# Supplementary material for: A temperature-regulated circuit for feeding behavior
Source: PubMed Central journal article supplement (PMC9307622; doi:10.1038/s41467-022-31917-w), 2022-07-22
Supplement: 41467_2022_31917_MOESM1_ESM.pdf [file 41467_2022_31917_MOESM1_ESM.pdf]

## Supplementary Information for

# A temperature-regulated circuit for feeding behavior

Shaowen Qian<sup>1,2,\*</sup>, Sumei Yan<sup>1</sup>, Ruiqi Pang<sup>1,3</sup>, Jing Zhang<sup>4</sup>, Kai Liu<sup>2</sup>, Zhiyue Shi<sup>1</sup>, Zhaoqun Wang<sup>1</sup>, Penghui Chen<sup>1</sup>, Yanjie Zhang<sup>1</sup>, Tiantian Luo<sup>1</sup>, Xianli Hu<sup>1</sup>, Ying Xiong<sup>1,\*</sup>, Yi Zhou<sup>1,\*</sup>

<sup>1</sup> Department of Neurobiology, Chongqing Key Laboratory of Neurobiology, School of Basic Medicine, Army Medical University, Chongqing, China

<sup>2</sup> Department of Medical Imaging, The 960th Hospital of Joint Logistics Support Force of PLA (Former Jinan Military General Hospital), Jinan, Shandong, China

<sup>3</sup> Advanced Institute for Brain and Intelligence, School of Medicine, Guangxi University, Nanning, Guangxi, China

<sup>4</sup> Department of Radiation Oncology, Tianjin Medical University Cancer Institute and Hospital, National Clinical Research Center for Cancer, Tianjin, China

### \* Corresponding author:

Yi Zhou, PhD (Lead Contact, E-mail: zhouyisjtu@gmail.com)

Ying Xiong, PhD (E-mail: xiongying2001@163.com)

Shaowen Qian, PhD (E-mail: qianshaowen1110@163.com)

### Supplementary Information provided in this file:

**Supplementary Figure 1.** Food intake and rectal temperature during ambient temperature exposure.

**Supplementary Figure 2.** C-Fos expressions in multiple preoptic and hypothalamic nuclei in a hunger state.

**Supplementary Figure 3.** C-Fos expressions in the apMPOA of mice with different dietary states during ambient temperatures.

**Supplementary Figure 4.** Anterograde tracking of glutamatergic neurons in the apMPOA and the effect of optogenetic terminal activation on food intake and rectal temperature.

**Supplementary Figure 5.** Feeding behavior under optogenetic activation on the apMPOA-recipient PVH and ARC neurons.

**Supplementary Figure 6.** Retrograde and anterograde tracing of apMPOA → ARC/PVH pathways for the strategy using high titer AAV1.

**Supplementary Figure 7.** Effects of the genetic ablation of postsynaptic neurons of the apMPOA → ARC/PVH/DMH pathways on food intake and rectal temperature.

**Supplementary Figure 8.** Heat maps of GCaMP6s signal changes ( $\Delta F/F$ ) of PVH and

ARC-projecting apMPOA neurons in response to ambient thermal exposure and local stimuli.

**Supplementary Figure 9.** Anatomical identifications of the apMPOA to ARC/PVH pathways via retrograde labeling.

**Supplementary Figure 10.** Retrograde labeling for PVH and ARC-projecting apMPOA neurons in vGluT2-cre and GAD2-cre mice.

**Supplementary Figure 11.** Monosynaptic retrograde RV co-expressed locations for the two subsets of PVH and ARC-projecting apMPOA neurons.

**Supplementary Figure 12.** Controls for RV experiments.

**Supplementary Figure 13.** Characterization of *Aplnr*, *GalR1*, PVH and ARC-projecting apMPOA neurons that got C-Fos activated by fasting.

**Supplementary Table 1.** Gene expression values (in FPKM) of ARC and PVH-projecting apMPOA neurons from RNA-seq analysis.

**Supplementary Table 2.** Differentially expressed genes and their test statistical P values of ARC and PVH-projecting apMPOA neurons from RNA-seq analysis.



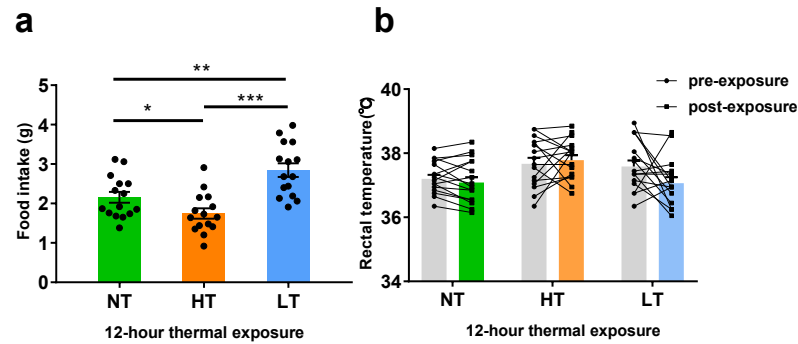

### Supplementary Figure 1. Food intake and rectal temperature during ambient temperature exposure

**a**, Food intake after overnight fasting during three different 12-hour ambient temperature conditions. One-way ANOVA and post hoc least significant difference (LSD) multiple comparison, \* $p = 0.035$ , \*\*  $p = 0.002$ , \*\*\* $p < 0.001$ ,  $n = 15$  animals for each group.

**b**, Rectal temperature changes after three different 12-hour ambient temperature exposure. Data were statistically analyzed using two-way repeated-measure ANOVA and post hoc LSD multiple comparison, no significance,  $n = 15$  animals for each temperature group. Interaction effect:  $F_{2,45}(\text{temperature} \times \text{time}) = 2.38$ ,  $p = 0.104$ ; main effect:  $F_{2,45}(\text{temperature}) = 4.79$ , \* $p = 0.013$ ;  $F_{1,45}(\text{time}) = 1.99$ ,  $p = 0.166$ .

All error bars show SEM.

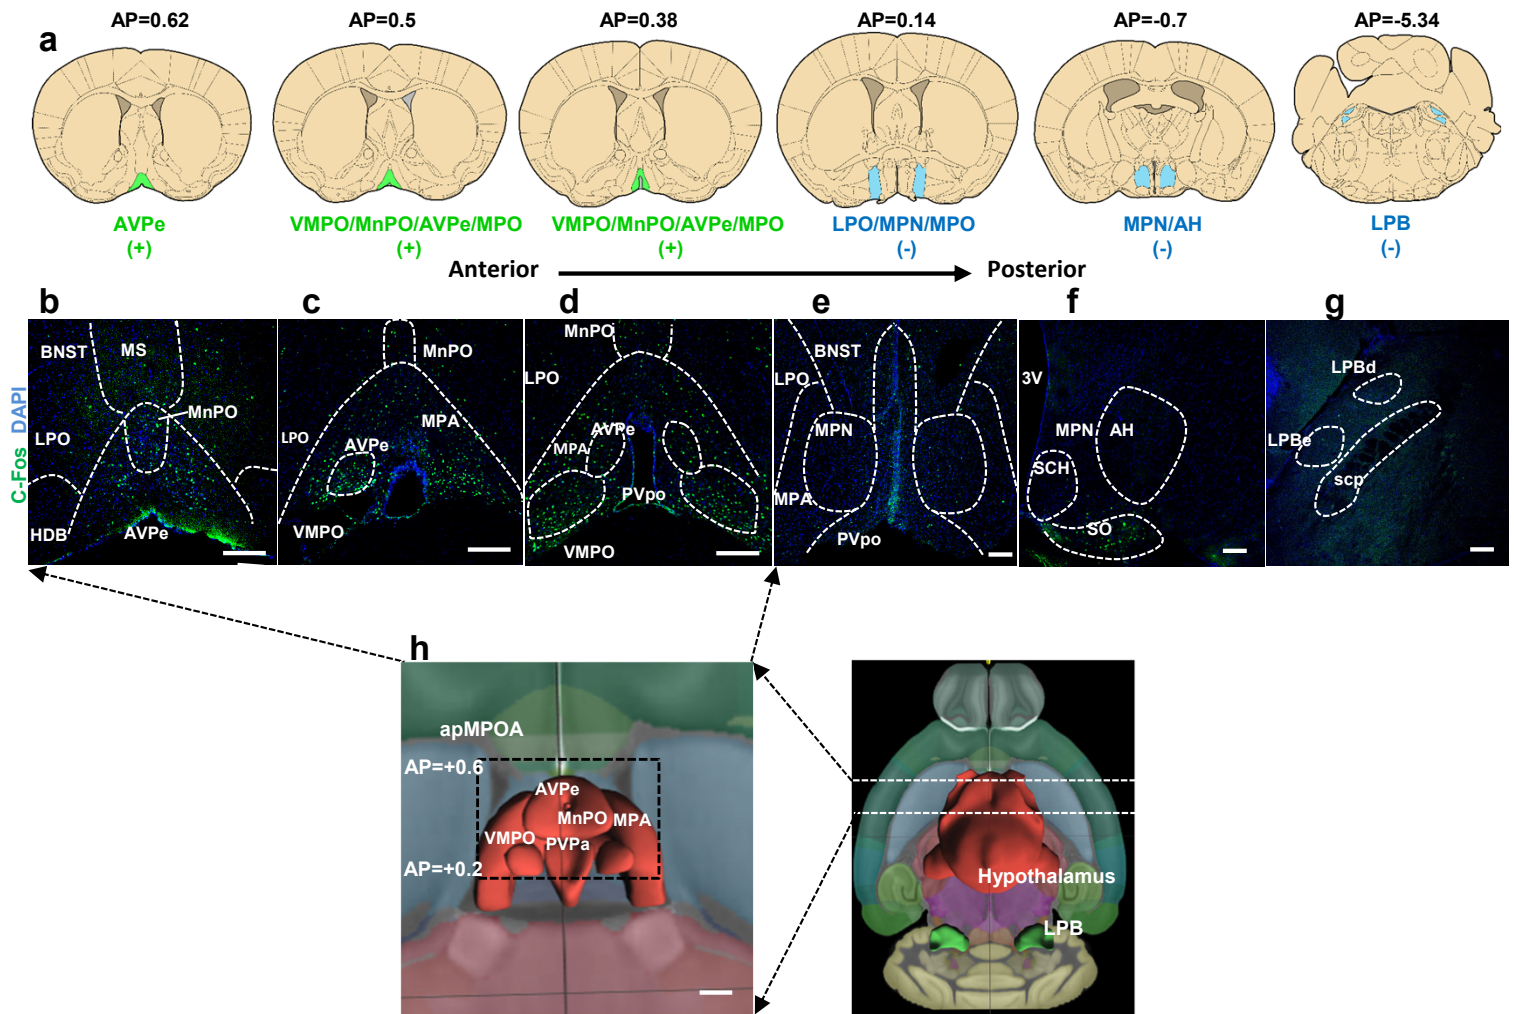

### Supplementary Figure 2. C-Fos expressions in multiple preoptic and hypothalamic nuclei in a hunger state

**a**, Schematic images corresponding to the coronal slices below show C-Fos staining in the hypothalamic nuclei and LPB in a hunger state. The green labeled areas represent C-Fos expression in a hunger state, whereas blue labeled areas do not.

**b-d**, Multiple hypothalamic nuclei showed C-Fos staining including AVPe, VMPO, anterior MPOA, ventral MnPO, and PVpo. These nuclei are defined as anteroventral and periventricular portions of medial preoptic area (apMPOA) in current study. AVPe, anteroventral periventricular nucleus; VMPO, ventromedial preoptic nucleus; MPOA, medial preoptic area; MnPO, median preoptic nucleus; PVpo, preoptic part of periventricular hypothalamic nucleus; 3V, the 3<sup>rd</sup> ventricle. The abbreviations can be looked up in Allen Brain Institute Reference Atlas. Image representative of  $n = 4$  mice. Scale bar, 100  $\mu\text{m}$ .

**e-g**, Other hypothalamic nuclei did not express C-Fos staining including LPO, posterior MPOA, MPN, posterior PVpo, AH, and LPB. LPO, lateral preoptic area; MPN, medial preoptic nucleus; AH, anterior hypothalamic nucleus; LPBe, external part of lateral parabrachial nucleus; LPBd, dorsal part of lateral parabrachial nucleus. Image representative of  $n = 4$  mice. Scale bar, 100  $\mu\text{m}$ .

**h**, The apMPOA consists of the AVPe, VMPO, anterior MPOA, ventral MnPO, and PVpo in a 3D viewer ranging from approximately  $AP = +0.6$  mm to  $AP = +0.2$  mm. Scale bar, 100  $\mu\text{m}$ .

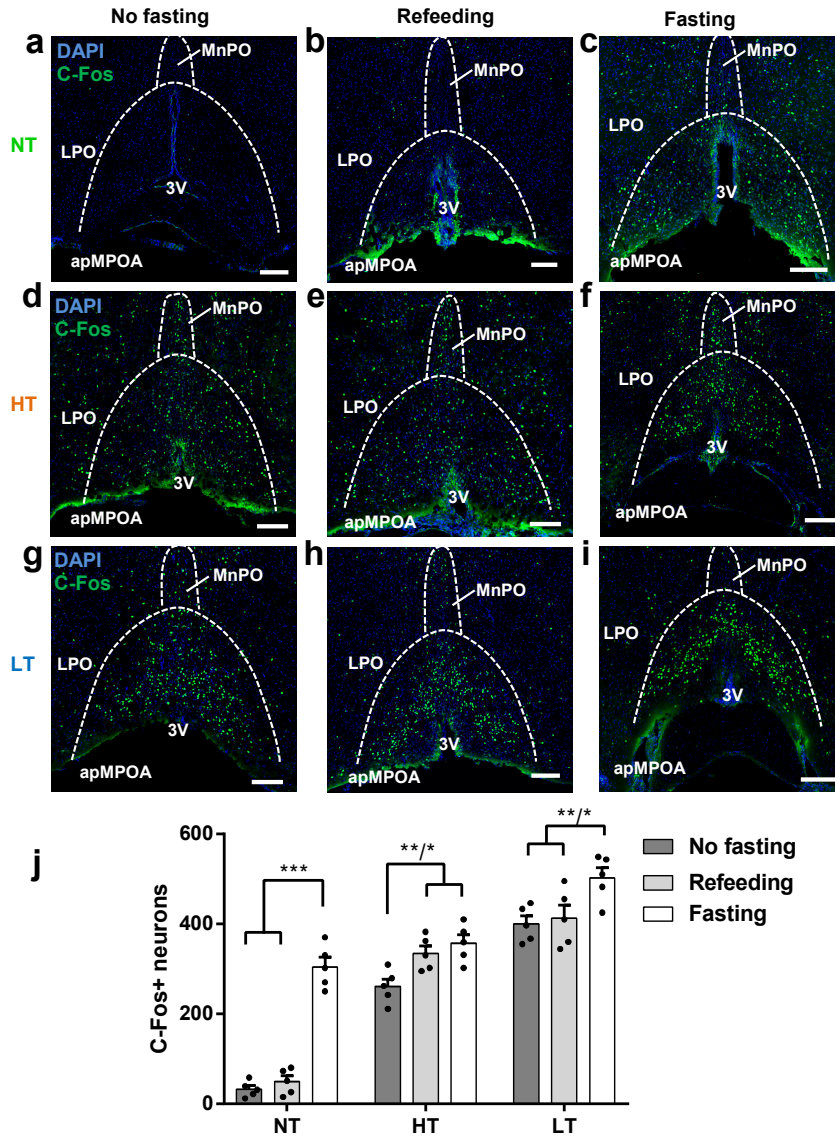

### Supplementary Figure 3. C-Fos expressions in the apMPOA of mice with different dietary states during ambient temperatures

**a-c**, C-Fos expressions in the apMPOA of no fasting (**a**), refeeding (**b**) and fasting (**c**) groups during neutral temperature. No significant C-Fos expressions during neutral temperature for no fasted mice (**a**). Substantial C-Fos expressions in apMPOA were induced by fasting (**c**) but significantly reduced (**b**) after refeeding. Scale bar, 100  $\mu$ m.

**d-f**, Substantial C-Fos expressions in the apMPOA during high temperature were found in no fasted (**d**), refeed (**e**) and fasted (**f**) mice. Scale bar, 100  $\mu$ m.

**g-i**, Substantial C-Fos expressions in the apMPOA during low temperature were found in no fasted (**g**), refeed (**h**) and fasted (**i**) mice. Scale bar, 100  $\mu$ m.

**j**, Quantitative statistically analysis of C-Fos expressions using two-way ANOVA showed interaction effect of temperature and dietary state:  $F(4,24) = 5.25$ ,  $**p = 0.003$ ; main effect of temperature:  $F(2,11) = 219.6$ ,  $***p < 0.001$ ; main effect of dietary state:  $F(2,12) = 67.8$ ,  $***p < 0.001$ . Pairwise comparisons showed that more C-Fos expressions in the fasted mice than no fasted and refeed mice during all the thermal exposures, especially during the neutral thermal exposure. All error bars show SEM.



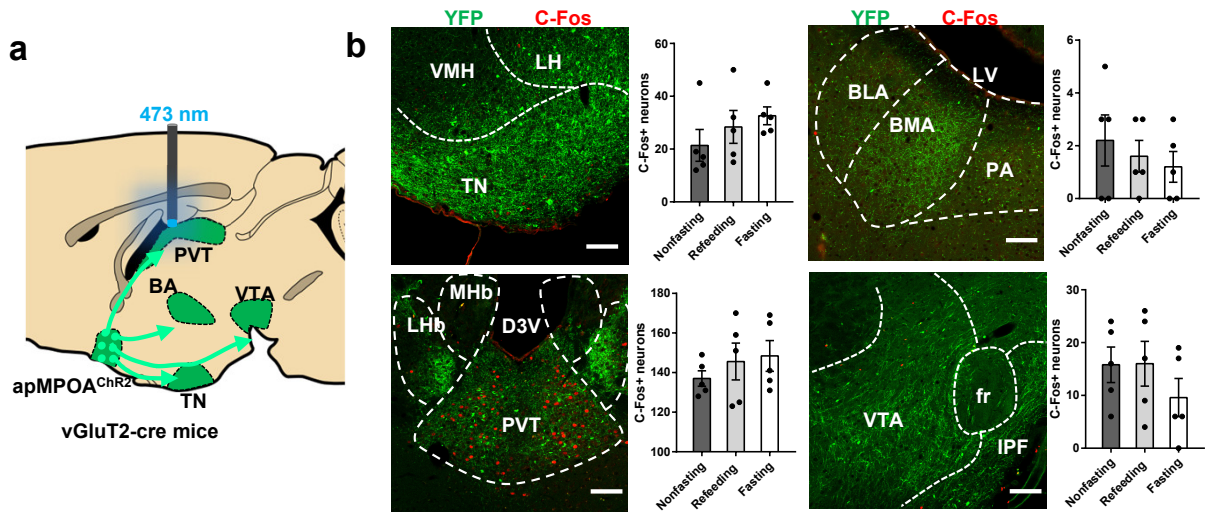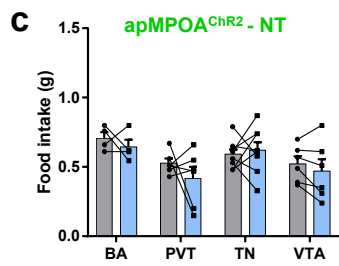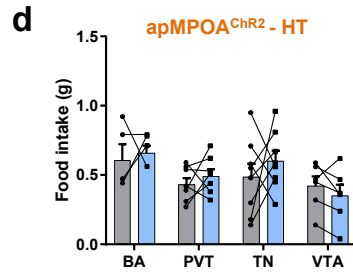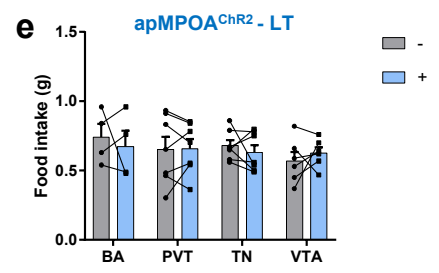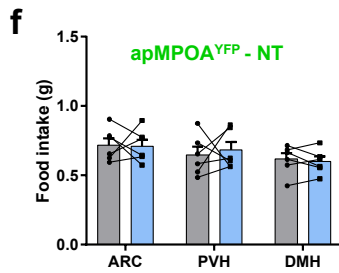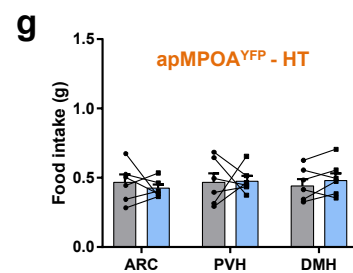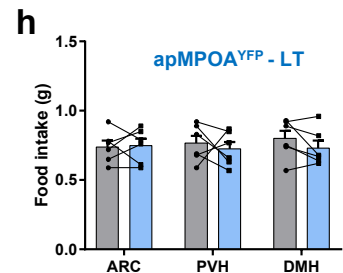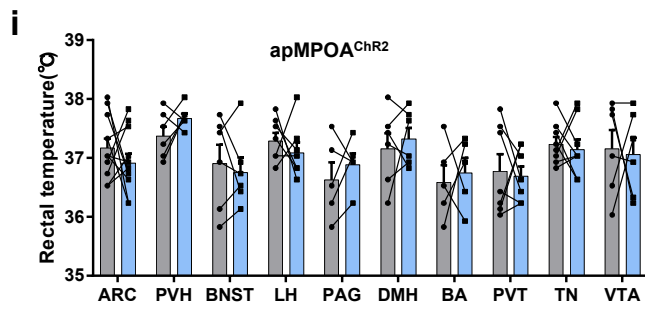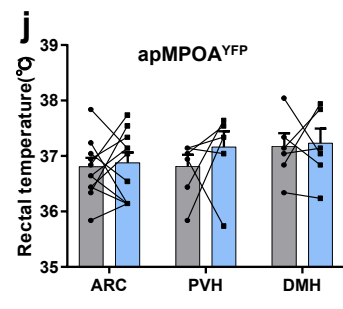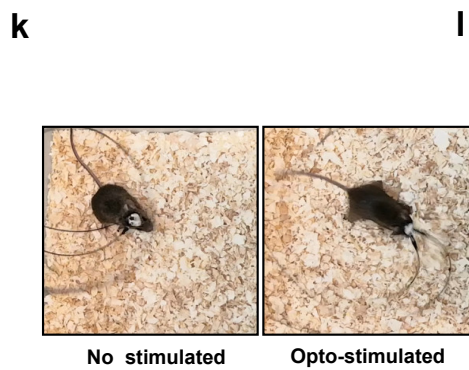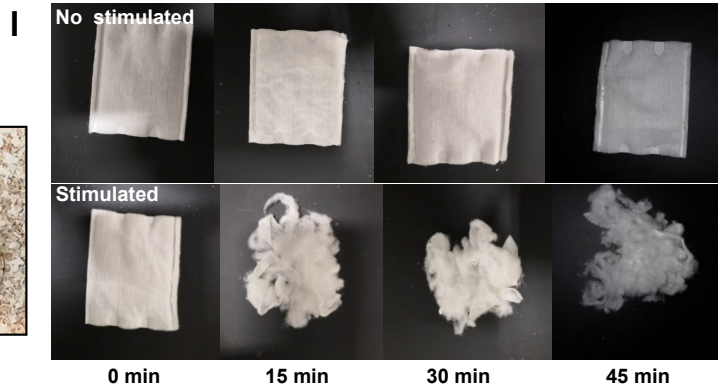

**Supplementary Figure 4. Anterograde tracking of glutamatergic neurons in the apMPOA and the effect of optogenetic terminal activation on food intake and rectal temperature**

**a**, Schematic sagittal image of terminal activation on individual target (PVT shown here), which allows for selective activation on the downstream target of apMPOA.

**b**, Representative images of target regions innervated by glutamatergic apMPOA neurons (green, ChR2), including the TN, PVT, VTA, and BA, in which no specific fasting-induced C-Fos expression can be observed compared to the re-feeding and no fasting conditions (red, C-Fos). Scale bar, 100  $\mu\text{m}$ .

**c-e**, Food intake with 2-hour opto-stimulation (+, blue boxes) and without opto-stimulation (-, gray boxes) on the target regions (BA, PVT, TN and VTA) during ambient temperatures. Two-way repeated-measure ANOVA and post hoc LSD multiple comparison, no significance.

**f-h**, Two-hour food intake with (+, blue boxes) and without (-, gray boxes) opto-stimulation on the PVH, ARC and DMH that expressed controlled YFP during ambient temperatures. Two-way repeated-measure ANOVA and post hoc LSD multiple comparison, no significance.

**i**, Rectal temperature with opto-stimulation (+, blue boxes) and without opto-stimulation (-, gray boxes) on the downstream terminal fibers of glutamatergic apMPOA neurons expressing ChR2. Paired t tests (two-sided), no significance.

**j**, Rectal temperature with opto-stimulation (+, blue boxes) and without (-, gray boxes) opto-stimulation on the PVH, ARC and DMH that expressed controlled YFP. Paired t tests (two-sided), no significance.

**k**, Terminal activation on the DMH induced nest building behavior. Representative photographs of a mouse that is scratching the sawdust in response to opto-stimulation.

**l**, Representative chewed cotton sheets in response to 45-min opto-stimulation and fresh cotton sheets in no-stimulation condition.

All error bars show SEM.

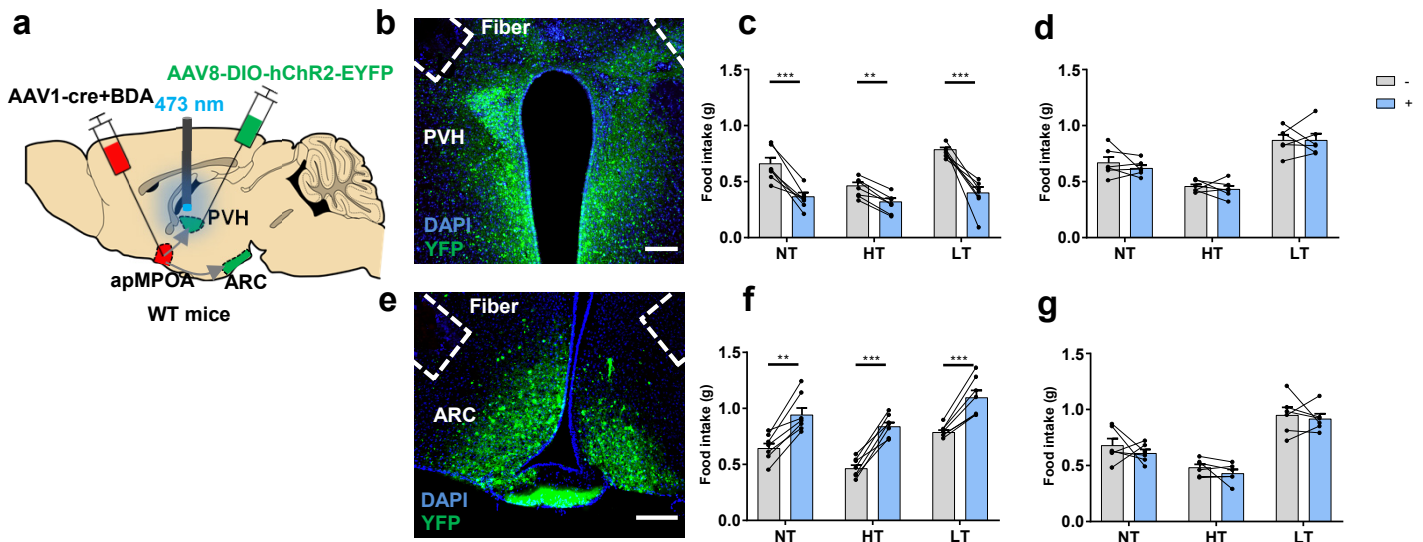

### Supplementary Figure 5. Feeding behavior under optogenetic activation on the apMPOA-recipient PVH and ARC neurons

**a**, Optogenetic activation on apMPOA-recipient PVH and ARC neurons by injecting high titer AAV1-cre into apMPOA and AAV8-DIO-hChR2 into PVH or ARC. BDA was mixed into the virus to indicate injection range.

**b, e**, Optical fiber implantation, apMPOA-recipient PVH and ARC neurons expressing hChR2-EYFP. Image representative of  $n = 7$  mice. Scale bar,  $100 \mu\text{m}$ .

**c**, Optogenetic activation on apMPOA-recipient PVH neurons significantly inhibited food intake in all thermal conditions. Interaction effect:  $F_{2,11}(\text{temperature} \times \text{treatment}) = 7.88$ ,  $**p = 0.008$ ; main effect:  $F_{2,11}(\text{temperature}) = 20.8$ ,  $***p < 0.001$ ;  $F_{1,12}(\text{treatment}) = 40.1$ ,  $***p < 0.001$ . Pairwise comparisons showed that optogenetic activating apMPOA-recipient PVH neurons inhibited food intake in all thermal conditions (NT:  $***p = 0.001$ , HT:  $**p = 0.009$ , LT:  $***p < 0.001$ ). Within-group tests showed significant simple effect of temperature in control group ( $F(2,11) = 27.14$ ,  $***p < 0.001$ ), but not in the optogenetic activating group ( $F(2,11) = 1.54$ ,  $p = 0.26$ ). Two-way repeated-measure ANOVA and post hoc LSD multiple comparison,  $n = 7$ .

**f**, Optogenetic activation on apMPOA-recipient ARC neurons significantly promoted food intake in all thermal conditions. Interaction effect:  $F_{2,11}(\text{temperature} \times \text{treatment}) = 0.52$ ,  $p = 0.61$ ; main effect:  $F_{2,11}(\text{temperature}) = 35.14$ ,  $***p < 0.001$ ;  $F_{1,12}(\text{treatment}) = 36.9$ ,  $***p < 0.001$ . Pairwise comparisons showed that optogenetic activating apMPOA-recipient ARC neurons increased food intake in all thermal conditions (NT:  $**p = 0.003$ , HT:  $***p < 0.001$ , LT:  $***p = 0.001$ ). Within-group tests showed significant simple effect of temperature in both of control group ( $F(2,11) = 20.73$ ,  $***p < 0.001$ ) and optogenetic activating group ( $F(2,11) = 14.93$ ,  $***p < 0.001$ ). Two-way repeated-measure ANOVA and post hoc LSD multiple comparison,  $n = 7$ .

**d, g**, The controlled groups that expressed YFP in apMPOA-recipient PVH and ARC neurons did not show food intake changes under optogenetic activation. PVH (**d**): interaction effect:  $F_{2,9}(\text{temperature} \times \text{treatment}) = 0.22$ ,  $p = 0.81$ ; main effect:  $F_{2,9}(\text{temperature}) = 46.83$ ,  $***p < 0.001$ ;  $F_{1,10}(\text{treatment}) = 0.34$ ,  $p = 0.57$ . ARC (**g**): interaction effect:  $F_{2,9}(\text{temperature} \times \text{treatment}) = 0.19$ ,  $p = 0.83$ ; main effect:  $F_{2,9}(\text{temperature}) = 82.89$ ,  $***p < 0.001$ ;  $F_{1,10}(\text{treatment}) = 0.82$ ,  $p = 0.39$ . Two-way repeated-measure ANOVA and post hoc LSD multiple comparison,  $n = 6$ .

All error bars show SEM.

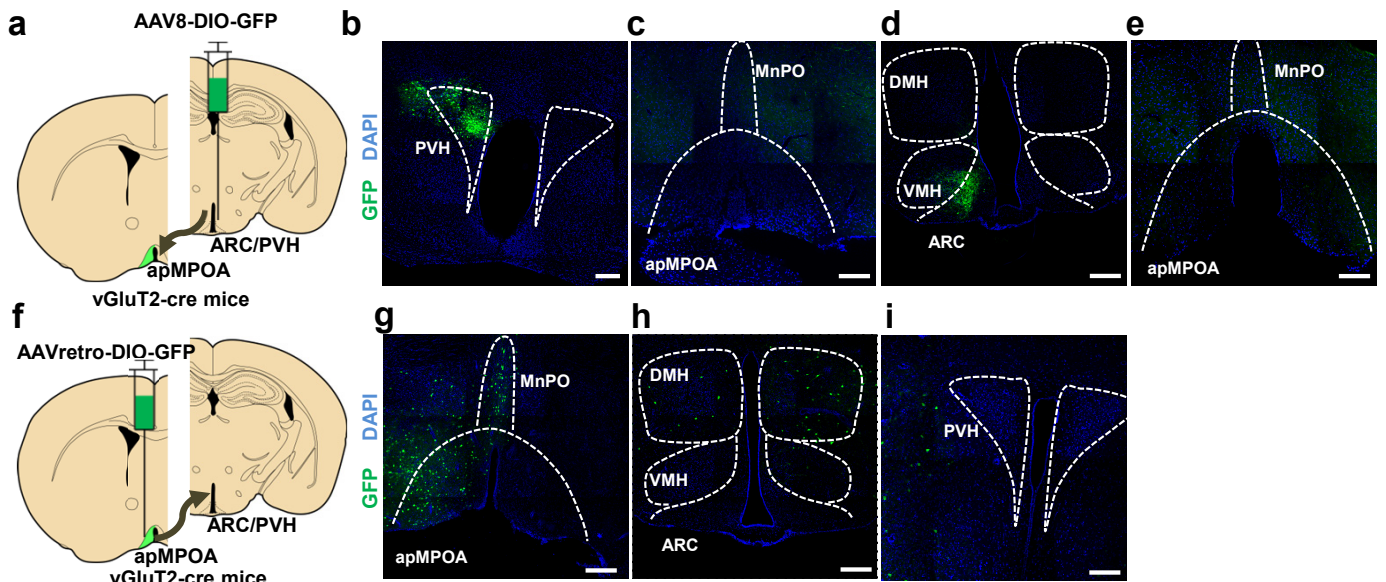

**Supplementary Figure 6. Retrograde and anterograde tracing of apMPOA→ARC/PVH pathways for the strategy using high titer AAV1**

**a**, Schematic image of injecting anterograde AAV-syn-GFP into the PVH or ARC to investigate whether there are terminals in the apMPOA innervated by PVH or ARC.

**b, d**, Schematic coronal images showing neurons expressing GFP in the injection site PVH and ARC. Image representative of  $n = 4$  mice. Scale bar,  $100 \mu\text{m}$ .

**c, e**, Schematic coronal images showing no projections from PVH or ARC to apMPOA. Image representative of  $n = 4$  mice. Scale bar,  $100 \mu\text{m}$ .

**f**, Schematic image of injecting retrograde AAVretro-DIO-GFP in the apMPOA of vGluT2-cre mice to investigate whether there are retrogradely labeled neurons in PVH or ARC.

**g**, Schematic coronal images showing neurons expressing GFP in the injection site apMPOA. Image representative of  $n = 4$  mice. Scale bar,  $100 \mu\text{m}$ .

**h, i**, Schematic coronal images showing there were no retrograde labeled neurons in the PVH or ARC from the apMPOA. Image representative of  $n = 4$  mice. Scale bar,  $100 \mu\text{m}$ .



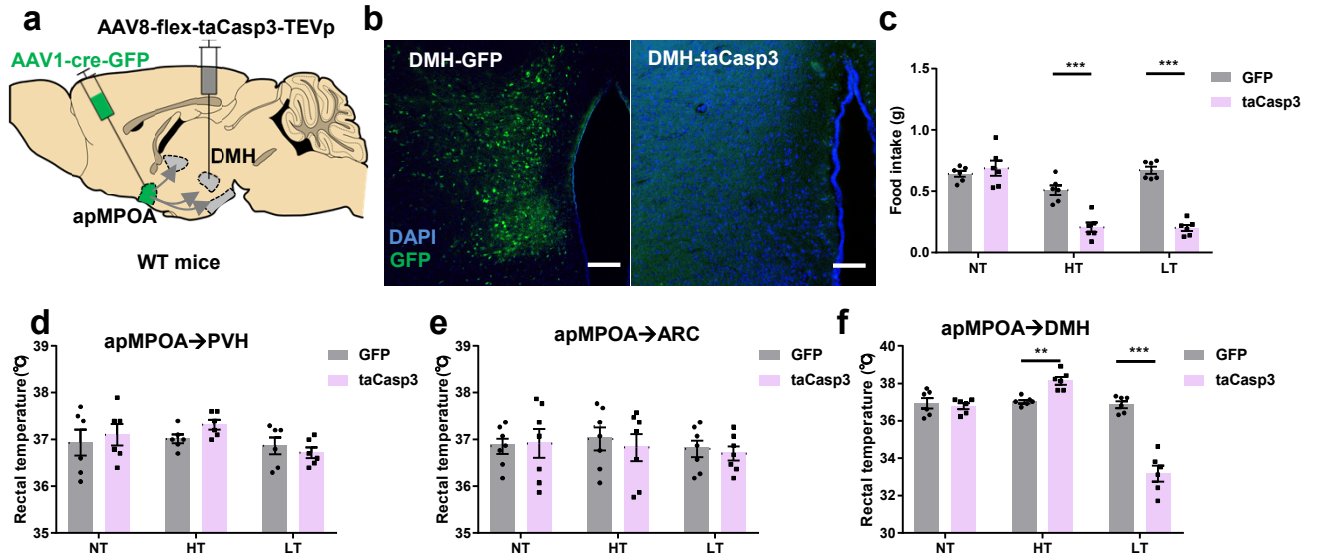

### Supplementary Figure 7. Effects of the genetic ablation of postsynaptic neurons of the apMPOA→ARC/PVH/DMH pathways on food intake and rectal temperature

**a**, Schematic image showing genetic ablation of apMPOA-recipient neurons in ARC/PVH/DMH individually (PVH shown here).

**b**, Representative images showing preserved transsynaptic neurons in DMH in GFP-injected mice, but ablated transsynaptic neurons in the DMH in taCasp3-injected mice. Image representative of  $n = 6$  mice. Scale bar, 100  $\mu\text{m}$ .

**c**, The ablation of transsynaptic neurons in DMH did not induce food intake changes under normothermic conditions, but significantly decreased food intake under high and low temperatures. Two-way repeated-measure ANOVA and post hoc LSD multiple comparison. Interaction effect of temperature and treatment group:  $*F(2,9) = 36.29$ ,  $***p < 0.001$ ; ANOVA main effect of temperature:  $F(2,9) = 33.06$ ,  $***p < 0.001$ ; ANOVA main effect of treatment group:  $F(1,10) = 50.33$ ,  $***p < 0.001$ .  $n = 6$  mice for each group.

**d-e**, The genetic ablation of postsynaptic neurons of apMPOA→PVH and ARC pathways had no influence on rectal temperature changes under ambient temperature exposures. Two-way repeated-measure ANOVA and post hoc LSD multiple comparison. **d**, apMPOA→PVH: interaction effect of temperature and treatment group:  $*F(2,9) = 1.76$ ,  $p = 0.227$ ; main effect of temperature:  $F(2,9) = 4.08$ ,  $p = 0.055$ ; main effect of treatment group:  $F(1,10) = 1.15$ ,  $p = 0.309$ ,  $n = 6$  mice. **e**, apMPOA→ARC: interaction effect of temperature and treatment group:  $*F(2,11) = 0.154$ ,  $p = 0.859$ ; ANOVA main effect of temperature:  $F(2,11) = 0.368$ ,  $p = 0.7$ ; ANOVA main effect of treatment group:  $F(1,12) = 0.126$ ,  $p = 0.729$ ,  $n = 7$  mice.

**f**, The genetic ablation of postsynaptic neurons of the apMPOA→DMH pathway resulted in abnormal thermoregulation under ambient temperatures with an increased rectal temperature during high temperature but a decreased rectal temperature during low temperature. Two-way repeated-measure ANOVA and post hoc LSD multiple comparison. Interaction effect of temperature and treatment group:  $*F(2,9) = 37.28$ ,  $***p < 0.001$ ; ANOVA main effect of temperature:  $F(2,9) = 42.43$ ,  $***p < 0.001$ ; ANOVA main effect of treatment group:  $F(1,10) = 25.9$ ,  $***p < 0.001$ .

All error bars show SEM.



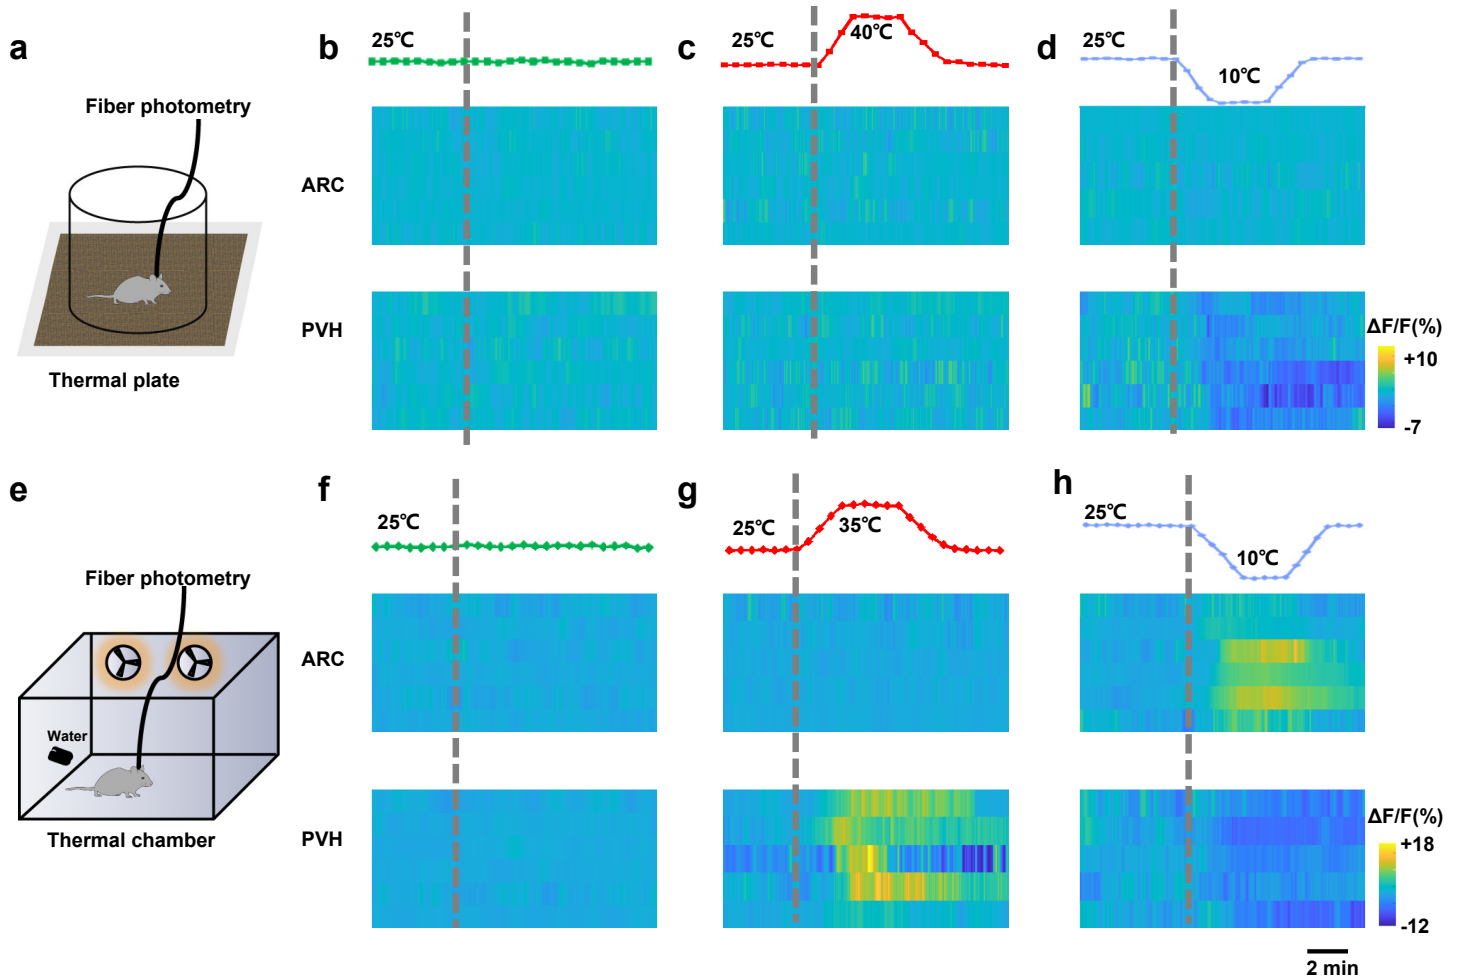

**Supplementary Figure 8. Heat maps of GCaMP6s signal changes ( $\Delta F/F$ ) of PVH and ARC-projecting apMPOA neurons in response to ambient thermal exposure and local stimuli**

**a**, Schematic of local thermal exposure on a temperature-controlled plate.

**b-d**, GcaMP6s signal changes ( $\Delta F/F$ ) of ARC (top) and PVH-projecting (bottom) apMPOA neurons in response to local thermal stimuli: neutral (25 °C, **b**), hot (25 °C  $\rightarrow$  40 °C, **c**), cold (25 °C  $\rightarrow$  10 °C, **d**).

**e**, Schematic of ambient exposure in a temperature-controlled chamber.

**f-h**, GcaMP6s signal changes ( $\Delta F/F$ ) of ARC (top) and PVH-projecting (bottom) apMPOA neurons in response to ambient exposure: neutral (25 °C, **f**), hot (25 °C  $\rightarrow$  35 °C, **g**), cold (25 °C  $\rightarrow$  10 °C, **h**).

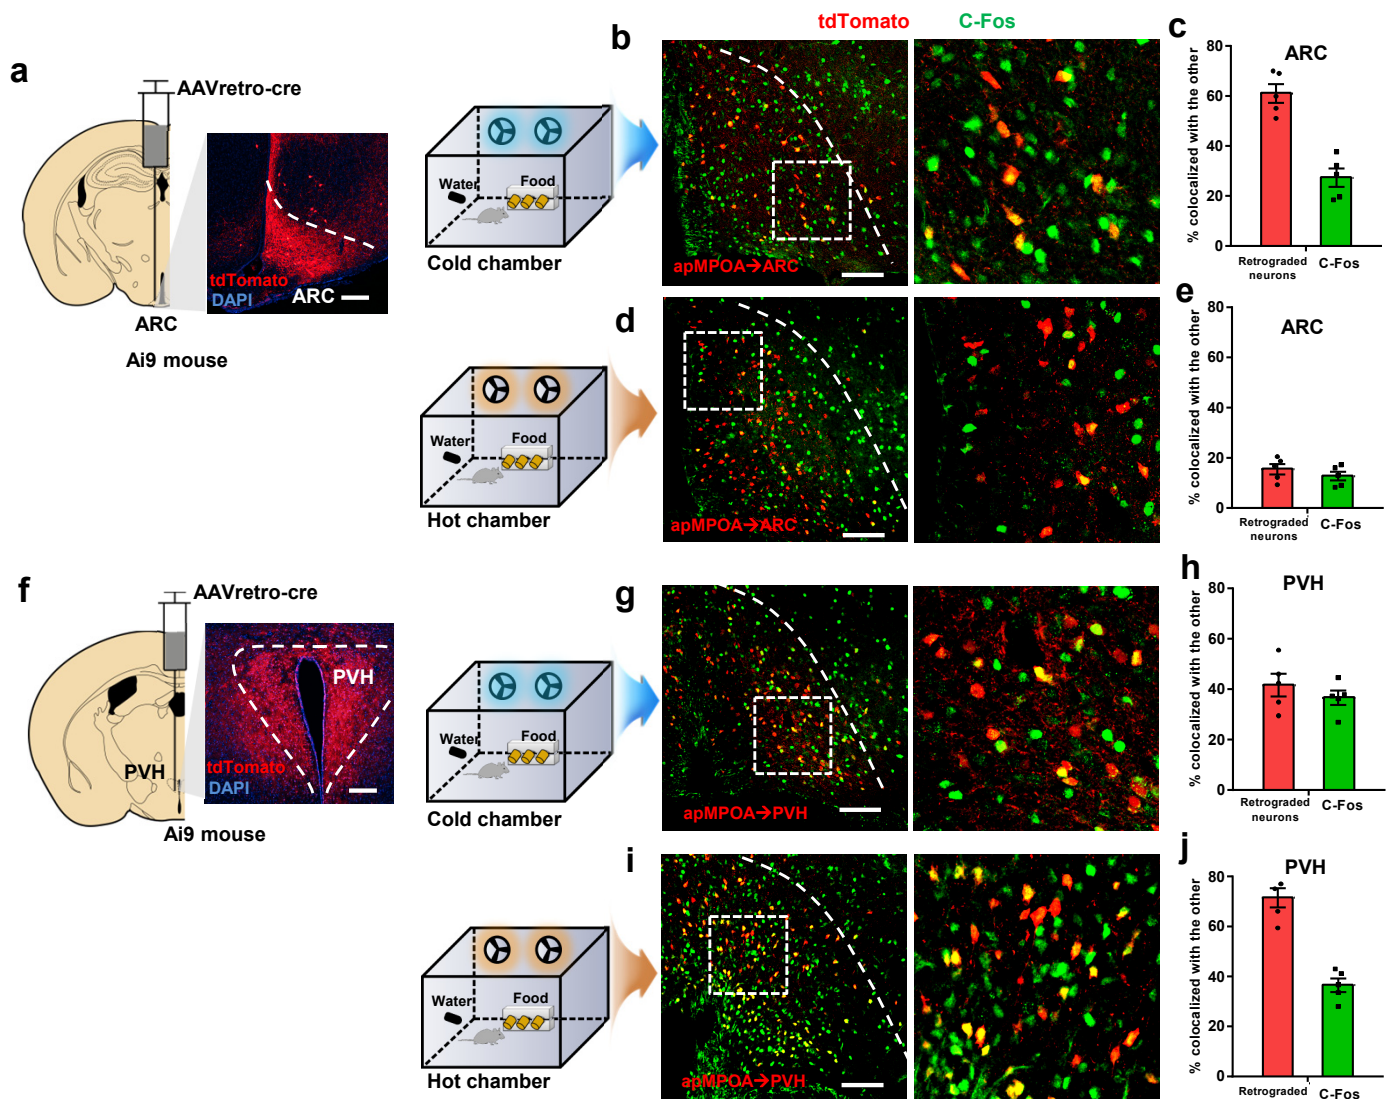

### Supplementary Figure 9. Anatomical identifications of the apMPOA to ARC/PVH pathways via retrograde labeling.

**a**, Schematic and representative coronal images of the injection of AAVretro-cre virus into ARC in Ai9 mice.

**b-c**, Colocalizations of ambient cooling-induced C-Fos (green) with retrograde-labeled neurons (red) by injecting AAVretro-cre into the ARC of Ai9 mice. The ARC-projecting apMPOA neurons were obviously overlapped with cooling-induced C-Fos (61.2  $\pm$  3.7% ARC-projecting apMPOA neurons expressed C-Fos). Scale bar, 100  $\mu$ m.

**d-e**, Colocalizations of ambient hot-induced C-Fos (green) with retrograde-labeled neurons (red) by injecting AAVretro-cre into the ARC of Ai9 mice. The ARC-projecting apMPOA neurons were sparsely overlapped with hot-induced C-Fos (15.7  $\pm$  2.1% ARC-projecting apMPOA neurons expressed C-Fos) Scale bar, 100  $\mu$ m.

**f**, Schematic and representative coronal images of the injection of AAVretro-cre virus into the PVH in Ai9 mice.

**g-h**, Colocalizations of ambient cooling-induced C-Fos (green) with retrograde-labeled neurons (red) by injecting AAVretro-cre into the PVH of Ai9 mice. The PVH-projecting apMPOA neurons were colocalized with the C-Fos induced by low temperature (41.9  $\pm$  4.5% PVH-projecting apMPOA neurons expressed C-Fos). Scale bar, 100  $\mu$ m.

**i-j**, Colocalizations of ambient hot-induced C-Fos (green) with retrograde-labeled neurons (red) by injecting AAVretro-cre into the PVH of Ai9 mice. The PVH-projecting apMPOA neurons were obviously colocalized with the C-Fos induced by high temperature (71.7  $\pm$  3.8% PVH-projecting apMPOA neurons expressed C-Fos). Scale bar, 100  $\mu$ m.

All error bars show SEM.

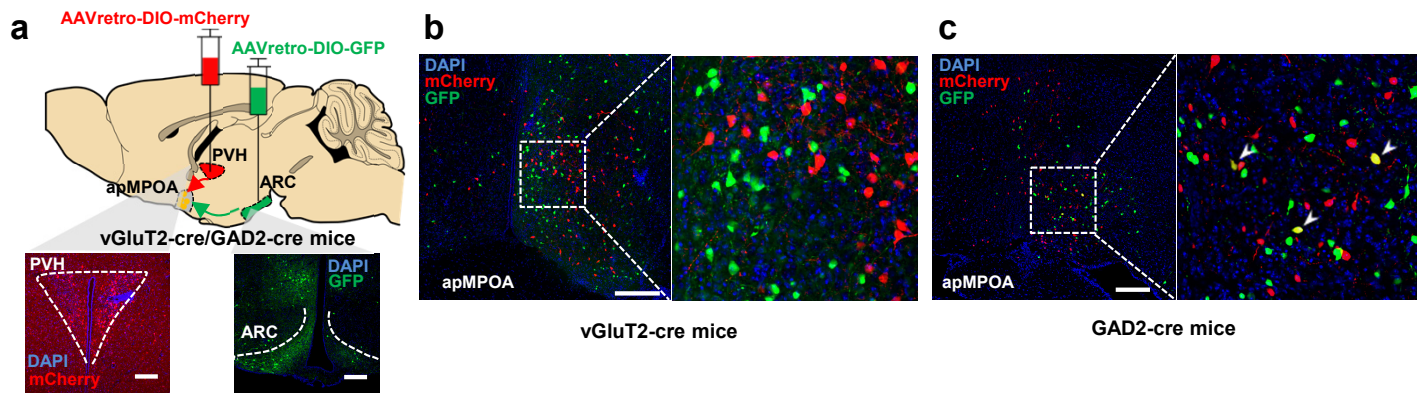

**Supplementary Figure 10. Retrograde labeling for PVH and ARC-projecting apMPOA neurons in vGluT2-cre and GAD2-cre mice**

**a**, Schematic and representative coronal images of the injection of AAVretro-DIO-mCherry and AAVretro-DIO-GFP into PVH and ARC of vGluT2-cre and GAD2-cre mice. Scale bar, 100  $\mu$ m.

**b**, Retrograde-labeled PVH (red) and ARC (green) projecting neurons in the apMPOA showed no colocalizations in the vGluT2-cre mice.  $n = 4$ , Scale bar, 100  $\mu$ m.

**c**, Retrograde-labeled PVH (red) and ARC (green) projecting neurons in the apMPOA showed a small fraction of colocalizations in the GAD2-cre mice.  $n = 4$ , Scale bar, 100  $\mu$ m.



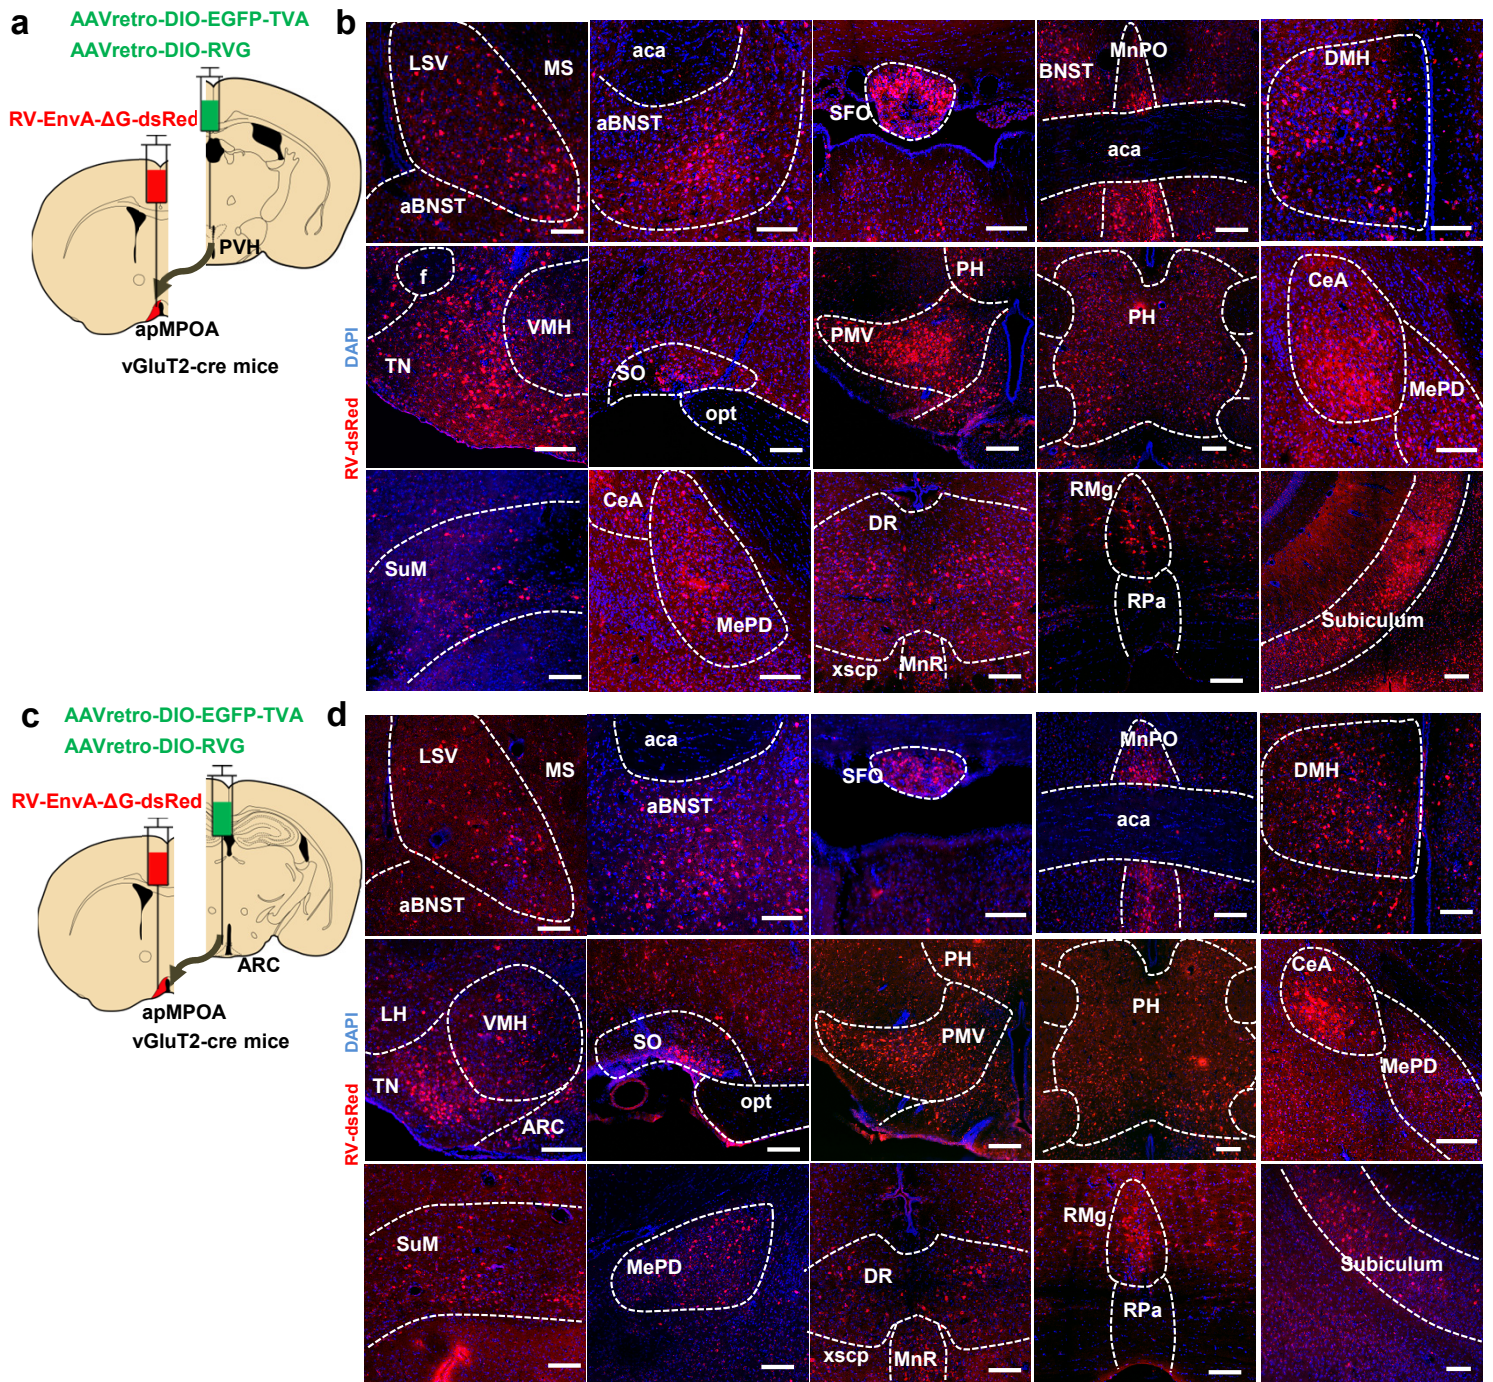

**Supplementary Figure 11. Monosynaptic retrograde RV co-expressed locations for the two subsets of PVH and ARC-projecting apMPOA neurons**

**a, c**, Schematic images of the injection of Cre-dependent AAVretro vector expressing RV helpers into the PVH (**a**) or ARC (**c**) on day 1 and RV-EnvA-ΔG-dsRed on day 21 into apMPOA of vGluT2-cre mice

**b, d**, Retrograde RV co-expressed nuclei for the two subsets of PVH and ARC-projecting apMPOA neurons, including ventral lateral septal nucleus (LSV), anterior BNST (aBNST), subfornical organ (SFO), MnPO, DMH, TN, supraoptic nucleus (SO), ventral premammillary nucleus (PMV), posterior hypothalamus (PH), central amygdaloid nucleus (CeA), supramammillary nucleus (SuM), posterodorsal part of medial amygdaloid nucleus (MePD), dorsal raphe nucleus (DR), raphe magnus nucleus (RMg), and subiculum. MS, medial septal nucleus; aca, anterior part of anterior commissure; f, fornix; opt, optic tract; xscp, decussation of the superior cerebellar peduncle; MnR, median raphe nucleus; RPa, raphe pallidus nucleus. Image representative of n = 4 mice. Scale bar, 100 μm.



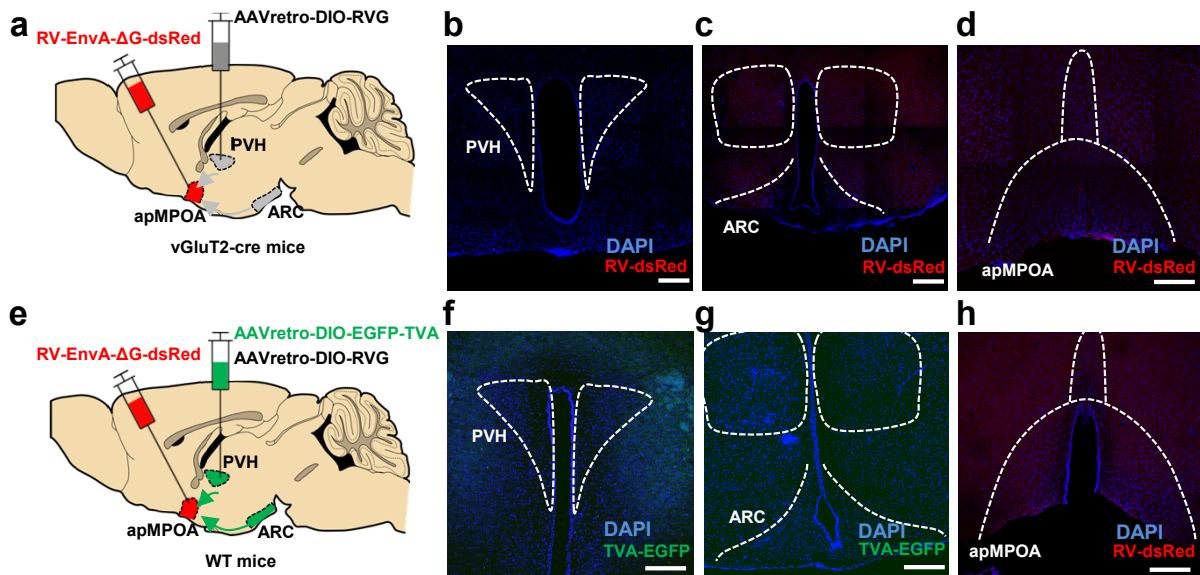

### Supplementary Figure 12. Controls for RV experiments

**a**, Schematic images of injecting AAVretro-DIO-RVG without TVA into the PVH or ARC on day 1 and RV-EnvA- $\Delta$ G-dsRed on day 21 into apMPOA of vGlut2-cre mice.

**b-d**, Coronal images of PVH, ARC and apMPOA showed no dsRed-labeled neurons in the apMPOA or other areas in the brain, indicating the dependence of the RV infection on the TVA expression. Image representative of  $n = 4$  mice for **b** and **c**, and  $n = 8$  mice for **d**. Scale bar, 100  $\mu$ m.

**e**, Schematic images of injecting mixed helper viruses with AAVretro-DIO-oRVG and AAVretro-DIO-TVA-EGFP into the PVH or ARC on day 1 and RV-EnvA- $\Delta$ G-dsRed on day 21 into apMPOA of wild-type mice.

**f-h**, Coronal images of PVH, ARC and apMPOA showed no TVA-GFP or RV-dsRed expression in the injection sites or apMPOA, suggesting no leaky expression of the helper viruses or RV. Image representative of  $n = 4$  mice for **f** and **g**, and  $n = 8$  mice for **h**. Scale bar, 100  $\mu$ m.

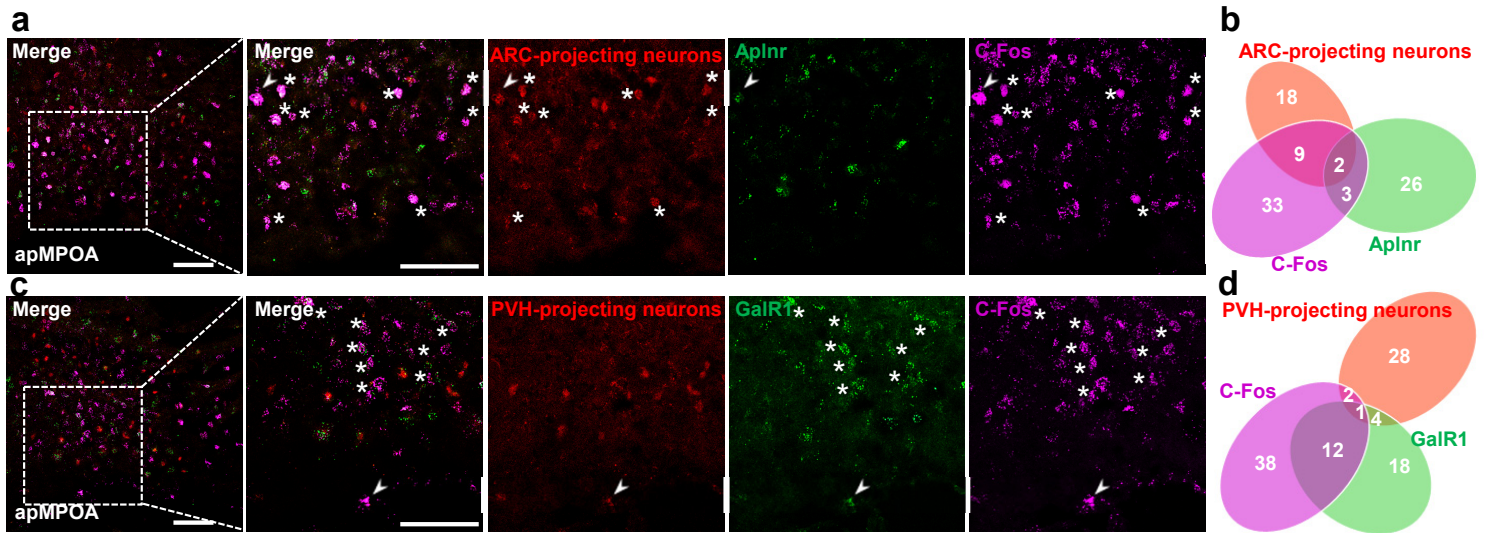

**Supplementary Figure 13. Characterization of *ApInr*, *GalR1*, PVH and ARC-projecting apMPOA neurons that got C-Fos activated by fasting**

**a**, Colocalizations of *ApInr* (green), ARC-projecting apMPOA neurons (red) and fasting-induced C-Fos (purple). Image representative of  $n = 5$  mice. Scale bar, 100  $\mu\text{m}$ . Arrowhead denotes *ApInr*<sup>+</sup>, ARC-projecting<sup>+</sup>, and C-Fos<sup>+</sup> neurons, asterisk denotes ARC-projecting<sup>+</sup> and C-Fos<sup>+</sup> neurons.

**b**, Diagram illustrating quantitative counts showed that ARC-projecting neurons present colocalization with fasting-induced C-Fos (approximately 42.5% ARC-projecting neurons), but rarely with apelin receptor (approximately 6.9% ARC-projecting neurons).

**c**, Colocalizations of *GalR1* (green), PVH-projecting apMPOA neurons (red) and fasting-induced C-Fos (purple). Image representative of  $n = 5$  mice. Scale bar, 100  $\mu\text{m}$ . Arrowhead denotes *GalR1*<sup>+</sup>, PVH-projecting<sup>+</sup>, and C-Fos<sup>+</sup> neurons, asterisk denotes *GalR1*<sup>+</sup> and C-Fos<sup>+</sup> neurons.

**d**, Diagram illustrating quantitative counts showed that PVH-projecting neurons present minor colocalizations with fasting-induced C-Fos (approximately 12.5% PVH-projecting neurons), and galanin receptor 1 (approximately 20% ARC-projecting neurons).

**Supplementary Table 1** Gene expression values (in FPKM) of ARC and PVH-projecting apMPOA neurons from RNA-seq analysis. Values from each biological replicate are all included. ARC-projecting apMPOA replicates: A5, A6, A8, A10, A12; PVH-projecting apMPOA replicates: P11, P12, P15, P16, P17

| Gene ID   | Gene Symbol     | A_10  | A_12  | A_5  | A_6  | A_8  | P_11  | P_12 | P_15  | P_16  | P_17   |
|-----------|-----------------|-------|-------|------|------|------|-------|------|-------|-------|--------|
| 100009600 | 'Zglp1'         | 5.17  | 0.3   | 0    | 1.47 | 0    | 0     | 0    | 0     | 0.44  | 0      |
| 100009614 | 'Gm10024'       | 0     | 0.19  | 0    | 0    | 0    | 0     | 0    | 0     | 0     | 0      |
| 100017    | 'Ldlrap1'       | 0     | 0     | 0    | 0    | 0.82 | 0     | 0    | 0     | 0     | 0.82   |
| 100019    | 'Mdn1'          | 1.25  | 2.58  | 1.87 | 2.25 | 3.13 | 2.75  | 2.39 | 0.21  | 3.03  | 1.82   |
| 100033459 | 'Ifi208'        | 0.13  | 0.18  | 0    | 0.09 | 0.1  | 0     | 0    | 0     | 0.01  | 0.01   |
| 100034251 | 'Wfdc17'        | 0     | 0     | 2.99 | 0    | 0    | 0     | 0    | 0     | 0     | 0      |
| 100034361 | 'Mfap1b'        | 75.49 | 41.7  | 54   | 35.3 | 40.7 | 39.91 | 36.6 | 53.43 | 33.55 | 36.55  |
| 100034363 | 'Tmsb15b2'      | 15.53 | 8.21  | 24.1 | 5.93 | 10.5 | 3.27  | 0.14 | 6.96  | 7.06  | 10.26  |
| 100034684 | 'BC100530'      | 0     | 0     | 0    | 0.76 | 0    | 0     | 0    | 0.21  | 0     | 0      |
| 100036521 | 'Umad1'         | 55.47 | 59.98 | 54.6 | 76.5 | 44.4 | 60.85 | 58.7 | 79    | 68.03 | 65.66  |
| 100037258 | 'Dnajc3'        | 13.63 | 18.89 | 13.6 | 21.7 | 12.1 | 25.42 | 9.84 | 10.11 | 19.37 | 31.45  |
| 100037278 | 'Fam129c'       | 0.27  | 0.45  | 3.36 | 0    | 0    | 0     | 5.12 | 1.82  | 4.82  | 6.92   |
| 100037282 | 'Rsph3b'        | 59.44 | 57.38 | 30.1 | 45.5 | 31.3 | 35.76 | 30.5 | 40.07 | 27.64 | 60.44  |
| 100037283 | 'Rnaset2a'      | 45.74 | 57.53 | 52.8 | 54.9 | 62.1 | 63.44 | 65.9 | 20.65 | 32.06 | 5.96   |
| 100038347 | 'Fam174b'       | 21.64 | 19.62 | 18.5 | 16.7 | 22.9 | 13.75 | 8.17 | 27.08 | 17.44 | 15.03  |
| 100038514 | 'Gm11837'       | 5.58  | 9.32  | 6.97 | 20.5 | 2.43 | 0.11  | 0    | 4.15  | 3.05  | 4.68   |
| 100038538 | 'Gm10767'       | 0.03  | 6.46  | 0.29 | 0    | 0.12 | 3.84  | 3.1  | 2.41  | 0     | 6.29   |
| 100038570 | 'Prcd'          | 2.57  | 3.04  | 1.54 | 0    | 11.9 | 5.66  | 0    | 1.59  | 2.17  | 3.46   |
| 100038725 | 'Cep85l'        | 1.82  | 3.83  | 2.79 | 1.6  | 0.22 | 2.81  | 1.37 | 0.06  | 2.07  | 0      |
| 100038847 | 'Gm10406'       | 15.9  | 6.82  | 12.4 | 2.32 | 11.4 | 12.5  | 4.97 | 13.11 | 19.41 | 8.38   |
| 100038860 | 'Olfr239'       | 0     | 0     | 2.52 | 0    | 0    | 0     | 0    | 0     | 0     | 0      |
| 100038882 | 'Isg15'         | 1.74  | 0     | 1.62 | 4.82 | 0.14 | 0     | 0    | 0.51  | 4     | 0.48   |
| 100038949 | 'Gm1979'        | 0     | 0.05  | 0    | 0    | 0    | 0     | 0.07 | 0     | 0     | 0      |
| 100038992 | 'Gm2001'        | 0     | 0     | 0    | 0    | 0    | 0     | 1.08 | 0.67  | 0     | 0      |
| 100038993 | 'Gm2002'        | 0     | 0.1   | 0.05 | 0.34 | 0.26 | 0     | 0    | 0.64  | 0.09  | 0      |
| 100039014 | 'Gm20793'       | 0     | 0     | 0    | 0    | 0    | 0.01  | 0    | 0     | 0     | 0      |
| 100039028 | 'Mup11'         | 0     | 0     | 0    | 0    | 0    | 0     | 0    | 1.75  | 0     | 0      |
| 100039034 | 'Gm20795'       | 0     | 0     | 0    | 0    | 0    | 0.01  | 0    | 0     | 0     | 0      |
| 100039042 | 'Gm2016'        | 0     | 0     | 0    | 0    | 0.21 | 0     | 0    | 0     | 0     | 0      |
| 100039045 | 'Gm10471'       | 0.13  | 0.21  | 0.03 | 0    | 0.75 | 0.07  | 0.01 | 0.08  | 3.09  | 0.51   |
| 100039053 | 'Gm2023'        | 0     | 0     | 0    | 0    | 0    | 0     | 0    | 0     | 0     | 0.48   |
| 100039060 | '0610010B08Rik' | 0     | 0.15  | 0.12 | 0    | 1.07 | 0     | 0.68 | 0     | 2.91  | 0      |
| 100039087 | 'Gm2042'        | 0     | 0     | 0.03 | 0    | 0    | 0     | 0    | 0     | 0     | 0      |
| 100039123 | 'Gm14295'       | 175   | 172.8 | 149  | 212  | 147  | 205.4 | 148  | 169.5 | 124.6 | 127.91 |
| 100039175 | 'Gm9780'        | 0     | 0     | 0    | 0.06 | 0    | 0     | 0    | 0     | 0     | 0      |
| 100039192 | 'Tmem254c'      | 31.04 | 6.56  | 32.1 | 21.9 | 10.8 | 11.97 | 0    | 40.26 | 21.84 | 53.96  |
| 100039227 | 'Duxbl2'        | 0.28  | 0.13  | 0.56 | 6.92 | 0    | 0.65  | 0    | 0.28  | 0     | 0.73   |
| 100039246 | 'Plac9b'        | 0.55  | 0     | 3.61 | 0    | 0    | 0     | 0    | 3.79  | 0     | 0      |
| 100039257 | 'Tmem254b'      | 30.63 | 28.04 | 50.7 | 70.4 | 85.7 | 78.86 | 86.9 | 42.19 | 69.1  | 58.51  |
| 100039284 | 'Gm2137'        | 3.09  | 3.09  | 2.43 | 3.07 | 2.85 | 1.38  | 3.76 | 0.86  | 9.63  | 1.88   |
| 100039293 | 'Duxbl3'        | 0.28  | 0.42  | 0.56 | 4.17 | 0    | 0.65  | 0    | 0.28  | 0     | 0.31   |
| 100039441 | 'Gm2237'        | 1.15  | 1.01  | 0.75 | 0.22 | 1.15 | 0.98  | 2.1  | 1.63  | 4.06  | 0.27   |
| 100039596 | 'Tcf24'         | 0     | 0     | 0    | 0.21 | 0    | 0     | 0    | 0     | 0     | 0      |
| 100039614 | 'Gm20809'       | 0     | 0     | 0    | 0    | 0    | 0     | 0    | 0     | 0.65  | 0      |
| 100039707 | 'Mthfs1'        | 21.35 | 16.81 | 24.4 | 87.3 | 22.8 | 58.19 | 24.5 | 21.28 | 36.78 | 22.58  |
| 100039795 | 'Ildr2'         | 6.6   | 3.14  | 1.97 | 5.17 | 8.72 | 7.41  | 0.28 | 2.59  | 3.38  | 8.28   |
| 100039815 | 'Gm2436'        | 7.49  | 0     | 4.19 | 0.14 | 4.31 | 0     | 0    | 9.86  | 0     | 2.96   |
| 100039830 | 'Gm2446'        | 0     | 4.36  | 0.36 | 0.14 | 1.73 | 0     | 12.9 | 0     | 0     | 0.75   |
| 100039863 | 'Gm13306'       | 0     | 0.98  | 0.58 | 6.23 | 0.33 | 0.44  | 0.26 | 0.96  | 3.6   | 0      |
| 100039939 | 'Gm2506'        | 12.18 | 5.09  | 3.48 | 2.38 | 6.43 | 2.12  | 5.17 | 6.93  | 12    | 6.11   |
| 100039968 | 'Tmem35b'       | 10.4  | 5.28  | 3.6  | 16   | 11.2 | 7.81  | 10.5 | 5.32  | 49.92 | 16.04  |
| 100040048 | 'Ccl27b'        | 0     | 0     | 0    | 5.43 | 0    | 12.44 | 0    | 2.3   | 7.92  | 13.74  |

|           |                 |       |       |      |      |      |       |      |       |       |       |
|-----------|-----------------|-------|-------|------|------|------|-------|------|-------|-------|-------|
| 100040171 | 'Gm20827'       | 0     | 0     | 0    | 0    | 0    | 0.01  | 0    | 0     | 0     | 0     |
| 100040335 | 'Gm20836'       | 0     | 0     | 0    | 0    | 0    | 0.01  | 0    | 0     | 0     | 0     |
| 100040462 | 'Mndal'         | 0.04  | 0.12  | 0.2  | 0.13 | 1.44 | 0.11  | 0.08 | 0.04  | 0.06  | 0.03  |
| 100040500 | 'Gm2808'        | 0     | 0.01  | 0.02 | 0.05 | 0.01 | 0     | 0    | 0     | 0     | 0     |
| 100040531 | 'Dynlt1f'       | 9.33  | 30.04 | 32   | 14   | 32.2 | 30.91 | 8.68 | 18.45 | 23.26 | 18.62 |
| 100040545 | 'Gm2832'        | 0     | 0     | 0    | 0    | 1.72 | 0     | 0.04 | 0     | 0     | 1.24  |
| 100040563 | 'Dynlt1c'       | 34.79 | 52.57 | 52.9 | 37.8 | 76.8 | 76.46 | 61.1 | 54.44 | 27.85 | 53.59 |
| 100040585 | 'Gm2854'        | 0.29  | 0     | 0    | 0    | 0    | 0     | 0    | 0     | 0     | 0     |
| 100040591 | 'Kcnj13'        | 0     | 0     | 0.11 | 0    | 0    | 0.12  | 0    | 0.53  | 0     | 0     |
| 100040599 | 'Gm15319'       | 0.01  | 0.03  | 0    | 0    | 1.15 | 0.03  | 0.05 | 0.27  | 0     | 0.01  |
| 100040608 | 'Fancf'         | 0.05  | 0     | 0    | 0    | 0.03 | 1.33  | 0    | 0.05  | 2.51  | 0     |
| 100040657 | 'Gm2888'        | 0     | 0     | 0    | 0    | 0.07 | 0     | 0    | 0     | 0     | 0     |
| 100040671 | 'Gm2897'        | 5.45  | 8.77  | 8.63 | 9.74 | 5.99 | 8.63  | 11   | 14.89 | 14.38 | 5.26  |
| 100040697 | 'Gm10340'       | 0     | 0.43  | 1.31 | 1.71 | 0    | 0     | 0    | 1.8   | 0.33  | 0     |
| 100040722 | 'Btbd35f13'     | 0     | 0     | 0.89 | 0    | 0    | 0     | 0    | 0     | 0     | 0     |
| 100040732 | 'Btbd35f14'     | 0     | 0     | 0    | 0    | 0.03 | 0     | 0    | 0     | 0     | 0     |
| 100040766 | 'Mroh2a'        | 0     | 0.01  | 0    | 0.06 | 0    | 0     | 0    | 0     | 0     | 0     |
| 100040771 | 'Gm2959'        | 0     | 0     | 0.19 | 0    | 0    | 0.04  | 0    | 0     | 0     | 0     |
| 100040807 | 'Gm2977'        | 0.07  | 0     | 0.9  | 0    | 0.03 | 0     | 1.24 | 2.07  | 0.47  | 0     |
| 100040870 | 'Gm3005'        | 6.77  | 4.78  | 4.13 | 5.17 | 11.6 | 2.02  | 5.8  | 9.32  | 12.45 | 5.85  |
| 100040935 | 'Gm3050'        | 0.61  | 0     | 0.09 | 0    | 0.03 | 0     | 0.39 | 1.21  | 0.38  | 0     |
| 100040944 | 'Gm3055'        | 4.34  | 1.74  | 4.5  | 0    | 1.11 | 0     | 1.17 | 2.47  | 0     | 2.39  |
| 100040972 | 'Tceal7'        | 2.46  | 0     | 0    | 0    | 5.32 | 0     | 0    | 1.37  | 4.33  | 2.92  |
| 100041012 | 'Gm3095'        | 3.19  | 3.6   | 1.69 | 0.84 | 0.61 | 2.42  | 3.88 | 4.23  | 2.89  | 2.45  |
| 100041057 | 'LOC100041057'  | 0     | 0.04  | 0.05 | 0    | 0    | 0     | 0.02 | 0     | 0     | 0     |
| 100041115 | 'Gm3147'        | 0     | 0     | 0    | 0    | 0    | 0     | 0    | 0     | 0.04  | 0     |
| 100041151 | 'Gm3636'        | 30.53 | 13.84 | 13.8 | 7.3  | 11.8 | 5.75  | 15.6 | 20.03 | 29.23 | 16.2  |
| 100041194 | 'Ahnak2'        | 0     | 0     | 0    | 0    | 0.44 | 0     | 0.34 | 0     | 0     | 0     |
| 100041230 | 'Hist1h4m'      | 6.24  | 2.72  | 28.1 | 13.4 | 1.13 | 21.14 | 20   | 10.47 | 4.73  | 12.66 |
| 100041256 | 'Gm20867'       | 0     | 0     | 0    | 0    | 0    | 0     | 0    | 0     | 0.06  | 0     |
| 100041262 | 'Gm3239'        | 2.27  | 1.36  | 1.1  | 0.16 | 1.71 | 0.29  | 2.38 | 2.39  | 0.44  | 1.69  |
| 100041273 | 'Ndufb4c'       | 34.4  | 31.97 | 50.3 | 61.4 | 36.8 | 88.95 | 52.3 | 36.33 | 49.86 | 34.71 |
| 100041279 | 'Gm3248'        | 4.47  | 8.39  | 0.85 | 0.88 | 1.42 | 1.74  | 0.73 | 4.28  | 0.68  | 3.8   |
| 100041294 | 'Supt4b'        | 0.24  | 0.18  | 0.52 | 0.29 | 0.09 | 0.16  | 0.06 | 0.95  | 0.54  | 0.31  |
| 100041306 | 'Gm3264'        | 11.56 | 7.4   | 9.25 | 2.32 | 10.4 | 5.15  | 11.6 | 17.19 | 15.56 | 9.52  |
| 100041420 | 'Gm3325'        | 1.21  | 0.11  | 0.19 | 0.29 | 0.28 | 0.73  | 5.61 | 0.24  | 3.13  | 0.47  |
| 100041504 | 'LOC100041504'  | 0     | 0     | 0    | 0    | 0.23 | 0.71  | 0    | 0     | 0     | 0     |
| 100041515 | 'Gm3383'        | 13.8  | 22.17 | 15.1 | 20.3 | 42.4 | 3.69  | 8.72 | 37.17 | 44.82 | 10.62 |
| 100041546 | 'Ly6c2'         | 0     | 0     | 0    | 0    | 0    | 0     | 0    | 0     | 5.51  | 0     |
| 100041574 | '9030025P20Rik' | 5.97  | 2.23  | 5.99 | 13   | 0    | 0.79  | 3.49 | 0.46  | 8.55  | 6.71  |
| 100041579 | 'Gm20878'       | 1.66  | 2.89  | 1.05 | 7.47 | 2.24 | 3.4   | 2.53 | 2.55  | 1.84  | 5.29  |
| 100041581 | 'Zkscan16'      | 4.4   | 2.57  | 9.02 | 2.87 | 8.33 | 11.13 | 10.5 | 1.88  | 5.72  | 2.59  |
| 100041585 | 'Amd2'          | 0.11  | 0.06  | 0.05 | 1.37 | 0.94 | 0     | 0.05 | 0.04  | 1.74  | 0.23  |
| 100041586 | 'Gm3417'        | 0     | 0     | 0    | 0    | 0    | 0     | 0    | 1.27  | 0     | 0     |
| 100041593 | 'LOC100041593'  | 0     | 0     | 0    | 0    | 0.28 | 3.16  | 0    | 0     | 0     | 0     |
| 100041599 | 'LOC100041599'  | 1.72  | 0.03  | 7.71 | 4.12 | 2.85 | 0     | 0.25 | 0.75  | 1.43  | 1.34  |
| 100041621 | 'Gm3435'        | 3.14  | 4.74  | 0.08 | 7.05 | 10.7 | 7.23  | 3.81 | 5.69  | 3.41  | 7.59  |
| 100041639 | 'Gm3448'        | 0     | 0     | 0    | 0.23 | 0    | 0     | 0    | 1.27  | 0     | 0     |
| 100041677 | 'Zfp984'        | 1.09  | 0.02  | 0.05 | 13.1 | 0.07 | 0.05  | 0    | 0     | 0     | 0.08  |
| 100041678 | 'Gm3500'        | 1.09  | 0.06  | 0.26 | 1.08 | 3.32 | 0.09  | 0    | 4.88  | 10.97 | 1.42  |
| 100041702 | 'Gm3476'        | 0     | 0     | 0.52 | 0    | 0    | 0     | 0.36 | 0     | 0.23  | 0     |
| 100041708 | 'LOC100041708'  | 0.13  | 0     | 0.05 | 0    | 0    | 0     | 0    | 0     | 0     | 0     |
| 100041712 | 'LOC100041712'  | 0     | 0     | 0.16 | 0    | 0    | 0     | 0    | 0     | 0     | 0     |
| 100041734 | '4930522L14Rik' | 2.18  | 0.06  | 0.1  | 0.55 | 5.04 | 1.14  | 1.1  | 0.24  | 10.6  | 2.63  |
| 100041735 | 'Gm3488'        | 7.13  | 13.54 | 20.2 | 2.19 | 10.4 | 2.17  | 7.89 | 21.24 | 19.63 | 8.9   |
| 100041774 | 'Gm10413'       | 0     | 0     | 0.06 | 0    | 0    | 0     | 0    | 0     | 0     | 0     |
| 100041840 | 'Gm10408'       | 0.04  | 0     | 0.11 | 0.15 | 0.22 | 0.19  | 0.04 | 0.13  | 0.31  | 0.61  |
| 100041874 | 'Gm3558'        | 13.35 | 9.44  | 10.3 | 5.01 | 12.4 | 9.65  | 5.73 | 11.63 | 10.23 | 16.21 |



|           |                 |       |       |      |      |      |       |      |       |       |       |
|-----------|-----------------|-------|-------|------|------|------|-------|------|-------|-------|-------|
| 100041953 | 'Sap18b'        | 272.9 | 292.4 | 254  | 294  | 291  | 358.4 | 195  | 280.5 | 198.4 | 233.7 |
| 100041958 | 'Gm3591'        | 1.04  | 0.14  | 0    | 0    | 0.12 | 0     | 0.34 | 0.11  | 0.15  | 0     |
| 100041964 | 'Gm3594'        | 0     | 0     | 0.14 | 0    | 0    | 0     | 0    | 0.06  | 0     | 0.06  |
| 100041979 | 'Gm3604'        | 0     | 1.3   | 0.48 | 0.02 | 0.16 | 0.1   | 0    | 1.24  | 0.52  | 0.14  |
| 100042054 | 'Gm3194'        | 1.15  | 0.37  | 1.17 | 5.34 | 0.7  | 0.03  | 7.35 | 1.13  | 1.09  | 1.44  |
| 100042074 | 'Gm3650'        | 0.98  | 0.5   | 0    | 0    | 0    | 0     | 2.17 | 2.68  | 1.4   | 0.16  |
| 100042100 | 'Gm3667'        | 2.11  | 2.78  | 2.87 | 0    | 2.2  | 0.9   | 1.16 | 2.85  | 3.2   | 3.07  |
| 100042149 | 'Gm3696'        | 3.71  | 5.56  | 4.6  | 0.17 | 6.17 | 7.46  | 6.69 | 11.39 | 6.84  | 4.98  |
| 100042150 | 'Nrg2'          | 2.27  | 0.12  | 2.74 | 0    | 0.17 | 1.76  | 2.05 | 0.63  | 0.79  | 0.82  |
| 100042165 | 'BC005561'      | 2.12  | 1.65  | 1.08 | 3.28 | 2.54 | 8.07  | 1.71 | 1.52  | 2.35  | 2.57  |
| 100042268 | 'Gm20907'       | 0     | 0     | 0.12 | 0    | 0    | 0     | 0    | 0     | 0     | 0     |
| 100042304 | 'Gm38418'       | 1.43  | 0.76  | 0.92 | 0    | 1.28 | 0.17  | 1.05 | 3.04  | 1.56  | 1.69  |
| 100042450 | 'Smim17'        | 3.11  | 3.15  | 2.46 | 0    | 2.04 | 8.61  | 5.94 | 2.98  | 0.23  | 2.41  |
| 100042480 | 'Nhsl2'         | 1.77  | 2.38  | 4.41 | 1.3  | 2.86 | 2.59  | 8.75 | 1.8   | 4.96  | 2.75  |
| 100042493 | 'Ccl21b'        | 0     | 0     | 0.79 | 0    | 7.13 | 4.14  | 6.01 | 0.1   | 1.97  | 2.71  |
| 100042499 | 'Vmn2r55'       | 0     | 0     | 0.02 | 0    | 0    | 0     | 0    | 0     | 0     | 0     |
| 100042503 | 'Ndufb4b'       | 15.07 | 9.34  | 12.1 | 7.05 | 29.9 | 18.33 | 16.1 | 16.1  | 32.54 | 19.31 |
| 100042514 | 'Sprr2a3'       | 0     | 0     | 0    | 0    | 0    | 0     | 0    | 0     | 6     | 0     |
| 100042555 | 'Gm13305'       | 0     | 0.04  | 0    | 0    | 0    | 0     | 0    | 0     | 0     | 0     |
| 100042591 | 'Vmn2r31'       | 0.02  | 0.04  | 0.02 | 0    | 0    | 0     | 0    | 0.02  | 0     | 0.03  |
| 100042636 | 'Vmn2r34'       | 0     | 0     | 0    | 0    | 0    | 0     | 0    | 0     | 0     | 0     |
| 100042653 | 'Vmn2r36'       | 0     | 0     | 0    | 0    | 0    | 0     | 0    | 0     | 0     | 0     |
| 100042698 | 'Gm3973'        | 1.89  | 0.06  | 0    | 0.07 | 0.9  | 0.86  | 0.3  | 0.56  | 0.06  | 0.71  |
| 100042781 | 'Vmn2r40'       | 0.02  | 0     | 0    | 0    | 0.01 | 0     | 0    | 0.01  | 0     | 0     |
| 100042784 | 'Prdm11'        | 0     | 0     | 1.94 | 0    | 0    | 0     | 0    | 0     | 0     | 0     |
| 100042786 | 'Gm16381'       | 0     | 0     | 0    | 0    | 0    | 0     | 0.11 | 0.27  | 0     | 0     |
| 100042807 | 'Eif3j2'        | 0     | 0     | 0.15 | 0.06 | 0    | 0.06  | 0    | 0     | 0.14  | 0     |
| 100042848 | 'Vmn2r41'       | 0     | 0     | 0    | 0    | 0.01 | 0     | 0    | 0     | 0     | 0     |
| 100042856 | 'Gm4070'        | 0     | 0     | 0    | 0    | 0.36 | 0     | 0    | 0     | 0     | 0     |
| 100042960 | 'Gm4131'        | 0     | 0     | 0    | 0    | 0    | 0     | 0.06 | 0     | 0     | 0     |
| 100043016 | 'Vmn1r131'      | 0     | 0     | 0.02 | 0    | 0    | 0     | 0    | 0     | 0     | 0     |
| 100043019 | 'Gm4175'        | 0     | 0     | 0    | 0.02 | 0    | 0     | 0    | 0     | 0     | 0     |
| 100043025 | 'Gm4177'        | 0     | 0     | 0    | 0.02 | 0    | 0     | 0    | 0     | 0     | 0     |
| 100043029 | 'Vmn1r138'      | 0     | 0     | 0.02 | 0    | 0    | 0     | 0    | 0     | 0     | 0     |
| 100043034 | 'Rex2'          | 0.34  | 0     | 0    | 0    | 0    | 0.05  | 0    | 0     | 0     | 0     |
| 100043037 | 'Gm10666'       | 0     | 0     | 0    | 0    | 0    | 2.64  | 0    | 0     | 0     | 0     |
| 100043079 | 'Gm4214'        | 0     | 0     | 0    | 0.02 | 0    | 0     | 0    | 0     | 0     | 0     |
| 100043083 | 'Gm4216'        | 0     | 0     | 0    | 0.02 | 0    | 0     | 0    | 0     | 0     | 0     |
| 100043088 | 'Vmn1r166'      | 0     | 0     | 0.02 | 0    | 0    | 0     | 0    | 0     | 0     | 0     |
| 100043133 | '9130023H24Rik' | 0     | 1.22  | 0    | 0    | 0.54 | 0.63  | 5.18 | 3.85  | 0     | 1.31  |
| 100043173 | 'BB114814'      | 0     | 0     | 0.3  | 0    | 0    | 0     | 0    | 0     | 0     | 0     |
| 100043272 | 'Inafm2'        | 14.9  | 17.84 | 6.69 | 22.2 | 17.1 | 4.67  | 8.82 | 6.36  | 6.01  | 5.69  |
| 100043314 | 'Tigit'         | 0     | 0.1   | 0    | 0.06 | 0.05 | 0     | 0    | 0     | 1.35  | 0.05  |
| 100043381 | 'Gm14308'       | 0.04  | 0.14  | 0.21 | 1.32 | 1.51 | 0     | 0    | 0.78  | 0     | 0     |
| 100043387 | 'Gm14305'       | 14.73 | 11.5  | 18.1 | 13.5 | 12.8 | 15.69 | 15.4 | 8.67  | 10.04 | 10.97 |
| 100043456 | 'Gm10681'       | 0     | 0     | 0    | 0    | 0    | 0.14  | 0    | 0     | 0     | 0     |
| 100043468 | 'Zfp955b'       | 8.88  | 6.93  | 1.94 | 4.62 | 14.8 | 4.63  | 13.1 | 3.72  | 7.43  | 5.86  |
| 100043474 | 'Olf1564'       | 0     | 0     | 0.06 | 0    | 0    | 0     | 0    | 0     | 0     | 0     |
| 100043497 | 'Nat8f7'        | 0.04  | 0     | 0    | 0.05 | 0    | 0     | 0.04 | 0.03  | 0     | 0     |
| 100043523 | 'Gm4498'        | 0     | 0     | 0.02 | 0    | 0    | 0     | 0    | 0     | 0     | 0     |
| 100043597 | 'Srcap'         | 1.18  | 1.95  | 7.66 | 3.2  | 5.8  | 1.63  | 3.67 | 3.77  | 3.16  | 0.87  |
| 100043604 | 'Vmn1r132'      | 0     | 0     | 0    | 0    | 0    | 0.05  | 0    | 0     | 0     | 0     |
| 100043617 | 'Gm4553'        | 0     | 0     | 0    | 0.02 | 0    | 0     | 0    | 0     | 0     | 0     |
| 100043638 | 'Gm4565'        | 0     | 0     | 0.02 | 0    | 0    | 0     | 0    | 0     | 0.47  | 0     |
| 100043665 | 'Gm10662'       | 0.83  | 0     | 0    | 0    | 0    | 0.03  | 0.03 | 0     | 0.3   | 0.02  |
| 100043684 | 'Amy2a4'        | 0     | 0.06  | 0.06 | 0.07 | 0.02 | 0.05  | 0.01 | 0.01  | 0.01  | 0.04  |
| 100043686 | 'Amy2a3'        | 0     | 0.06  | 0.06 | 0.07 | 0.02 | 0.05  | 0.01 | 0.01  | 0.01  | 0.04  |
| 100043688 | 'Amy2a2'        | 0     | 0.06  | 0.06 | 0.07 | 0.02 | 0.05  | 0.01 | 0.01  | 0.01  | 0.04  |

|           |                  |       |       |      |      |      |       |      |       |       |        |
|-----------|------------------|-------|-------|------|------|------|-------|------|-------|-------|--------|
| 100043757 | 'Zfp831'         | 0.38  | 0     | 2.37 | 0    | 0    | 0     | 0    | 0.01  | 0.01  | 0      |
| 100043772 | 'Zfp850'         | 0.01  | 1.37  | 2.56 | 0    | 1.12 | 0     | 2.95 | 1.52  | 4.67  | 1.89   |
| 100043861 | 'Klrb1'          | 0     | 2.95  | 0    | 0    | 0    | 0     | 0    | 0     | 0     | 0      |
| 100043914 | 'Zfp968'         | 0     | 0     | 0.12 | 0    | 0    | 1.14  | 0    | 0     | 0     | 0      |
| 100043915 | 'Gm4724'         | 0.58  | 0.73  | 1.22 | 0    | 1.02 | 0.13  | 0.59 | 0.79  | 0.47  | 0.52   |
| 100043920 | 'Fam205a4'       | 1.79  | 0     | 0.43 | 0.68 | 0.84 | 0.34  | 0.13 | 0     | 0     | 0.09   |
| 100044193 | 'Gm20939'        | 1.21  | 0.23  | 0.25 | 0    | 2.52 | 0.6   | 0.91 | 0.45  | 3.42  | 1.57   |
| 100044509 | 'Tgibr3'         | 0.04  | 1.34  | 4.57 | 0    | 2.12 | 2.9   | 2.74 | 4.39  | 5.41  | 2.87   |
| 100044627 | 'LOC100044627'   | 139.1 | 133.1 | 149  | 158  | 138  | 185.6 | 141  | 102.8 | 176.7 | 134.73 |
| 100045778 | 'Rnf223'         | 0     | 0     | 1.14 | 0    | 0    | 0     | 0    | 0     | 0     | 0      |
| 100045792 | 'Ect2'           | 0.73  | 0.12  | 0.09 | 0.41 | 0.68 | 0.16  | 0.03 | 0.18  | 0.47  | 0.8    |
| 100048534 | 'Cfap43'         | 0     | 0.1   | 0.44 | 0.01 | 0    | 0.14  | 0.6  | 0     | 0     | 0.18   |
| 100048644 | 'Pet117'         | 0.2   | 0     | 0    | 0    | 0.29 | 0     | 0    | 0.17  | 0     | 0      |
| 100072    | 'Camta1'         | 17.9  | 18.84 | 13.6 | 29.1 | 18.5 | 13.78 | 16.7 | 16.78 | 28.77 | 14.48  |
| 100073351 | 'Yy2'            | 1.8   | 2.29  | 1.91 | 4.55 | 0.6  | 3.14  | 0.29 | 0.98  | 0     | 0.63   |
| 100087    | 'Kti12'          | 16.14 | 15.11 | 20.8 | 0    | 19.7 | 17.92 | 8.85 | 20.2  | 1.42  | 20.1   |
| 100088    | 'Rcc1'           | 5.66  | 11.1  | 3.69 | 4.62 | 3.86 | 0.04  | 2.88 | 10.28 | 4.8   | 7.65   |
| 100090    | 'Zbtb48'         | 2.7   | 3.07  | 8.39 | 1.7  | 8.34 | 16.16 | 11.3 | 8.49  | 6.08  | 9.55   |
| 100101806 | 'Srp54c'         | 58.71 | 58.21 | 63.4 | 61.8 | 40.1 | 82.89 | 53.8 | 76.81 | 77.86 | 77.15  |
| 100101807 | '1700047117Rik2' | 37.38 | 39.97 | 30.8 | 25.4 | 27   | 17.47 | 25.2 | 18.62 | 27.95 | 16.73  |
| 100101919 | 'Dnah7c'         | 0.01  | 0.06  | 0.3  | 0    | 0.01 | 0.12  | 0    | 0     | 0     | 0.02   |
| 100102    | 'Pcsk9'          | 0     | 0     | 3.12 | 0.42 | 0    | 0     | 0    | 1.07  | 0     | 0      |
| 100113398 | 'Adat3'          | 2.1   | 0.86  | 6.09 | 14.3 | 1.45 | 0     | 3.71 | 0     | 0.62  | 0      |
| 100121    | 'Tdrd7'          | 1.8   | 3.46  | 0.63 | 6.94 | 3.14 | 4     | 10.5 | 0.24  | 4.65  | 4.56   |
| 100125586 | 'Vmn2r2'         | 0     | 0.07  | 0.35 | 1.96 | 0    | 0.12  | 0    | 0     | 0     | 0      |
| 100126824 | 'Sco2'           | 37.96 | 34.14 | 26.6 | 11.8 | 30.7 | 38.98 | 23.5 | 8.92  | 63.24 | 12.89  |
| 100129    | 'Gpr153'         | 4.76  | 3.44  | 4.88 | 0.52 | 0.24 | 2.16  | 8.22 | 0.02  | 0.39  | 0.78   |
| 100141474 | '4933428G20Rik'  | 0     | 0     | 0    | 0    | 0    | 0.1   | 0    | 0     | 0     | 0      |
| 100151772 | 'Srsx'           | 0     | 0     | 0    | 0    | 0    | 0.03  | 0    | 0     | 0     | 0      |
| 100155    | 'Al481877'       | 0.58  | 0     | 0    | 0    | 0.35 | 0     | 0    | 0     | 0     | 0      |
| 100163    | 'Pafah2'         | 0.25  | 5.2   | 2.75 | 0    | 5.9  | 0     | 3.42 | 3.37  | 1.19  | 2.9    |
| 100169    | 'Phactr4'        | 0.62  | 0.38  | 2.05 | 14.9 | 1.48 | 2.54  | 0.55 | 0.52  | 0.68  | 0.33   |
| 100169864 | 'Gm44504'        | 0     | 0.26  | 0.09 | 0.07 | 0    | 0     | 0.04 | 0     | 1.84  | 0.11   |
| 100169868 | 'Gm3173'         | 1.6   | 1.41  | 1.28 | 1.96 | 3.91 | 2.59  | 2.26 | 2.46  | 2.76  | 1.14   |
| 100177    | 'Zmym6'          | 8.42  | 5.66  | 9.47 | 6.98 | 8.7  | 4.65  | 5.86 | 4.28  | 7.96  | 10.99  |
| 100182    | 'Akna'           | 0.6   | 0     | 0.01 | 0    | 1.43 | 0.18  | 0.17 | 0     | 0.52  | 0      |
| 100188919 | 'Gm45915'        | 0.02  | 0     | 0.18 | 0.62 | 0    | 0     | 0.35 | 0     | 0.1   | 0      |
| 100198    | 'H6pd'           | 1.32  | 0     | 0.01 | 0    | 2.35 | 0.17  | 1.42 | 0.01  | 0.02  | 2.11   |
| 100201    | 'Tmem64'         | 2.95  | 2.21  | 2.92 | 6.31 | 0.54 | 2.07  | 4.2  | 3.01  | 0.61  | 0.01   |
| 100206    | 'Adprhl2'        | 12.57 | 21.57 | 39.3 | 3.99 | 29.2 | 36.58 | 26.7 | 29.96 | 8.18  | 23.58  |
| 100210    | 'Gpn2'           | 4.94  | 6.96  | 16.9 | 0    | 13.6 | 20.51 | 5.7  | 8.81  | 5.32  | 20.68  |
| 100213    | 'Rusc2'          | 6.85  | 11.13 | 8.39 | 1.66 | 8.69 | 4.55  | 3.87 | 6.55  | 3.61  | 7.97   |
| 100216455 | 'Gm14124'        | 0.01  | 0     | 0    | 0    | 0    | 0     | 0    | 0     | 0     | 0.01   |
| 100216474 | 'Ttl2'           | 0     | 0     | 1.03 | 0    | 0    | 0     | 0    | 0     | 0     | 0.02   |
| 100226    | 'Stx12'          | 71.62 | 82.32 | 96.2 | 67.8 | 77.9 | 53.32 | 84.9 | 78.29 | 85.99 | 64.04  |
| 100233175 | 'Gon7'           | 21.07 | 62.22 | 23   | 76.4 | 16.9 | 39.63 | 41   | 15    | 60.4  | 51.37  |
| 100233207 | 'Gm17359'        | 0     | 2.32  | 0.03 | 0    | 0    | 0     | 0    | 0.55  | 0     | 0      |
| 100233208 | 'Gm10778'        | 0.05  | 0.11  | 1.05 | 0.08 | 0.09 | 1.2   | 0    | 1.21  | 0.01  | 0.76   |
| 100270744 | 'Btbd18'         | 0.03  | 0     | 0.11 | 0    | 1.53 | 0     | 0.01 | 0     | 0     | 0      |
| 100271704 | 'Gm17660'        | 9.3   | 5.16  | 3.35 | 9.59 | 16.2 | 0     | 19.8 | 6.72  | 0     | 7.81   |
| 100271928 | 'Gm15881'        | 7.28  | 3.09  | 1.76 | 0.29 | 3.57 | 8.55  | 0    | 4.52  | 4.17  | 2.5    |
| 100273    | 'Osdbl9'         | 27.86 | 19.54 | 20   | 26.6 | 20   | 18.9  | 20.9 | 24.45 | 22.06 | 28.39  |
| 100294583 | 'Alkal2'         | 0.12  | 10.6  | 0    | 0    | 0    | 0     | 0    | 0     | 3.96  | 0      |
| 100294660 | 'Defa2'          | 0     | 0     | 0    | 0    | 0    | 0     | 0.14 | 0     | 0     | 0      |
| 100302688 | 'Gm17455'        | 0     | 2.76  | 0    | 0    | 0    | 0     | 4.59 | 0     | 5.08  | 0      |
| 100303732 | 'Zfp967'         | 2.12  | 0.31  | 1.97 | 1.81 | 0.95 | 0.47  | 0.51 | 1.04  | 0.48  | 1.1    |
| 100303744 | 'Sprr2a2'        | 0     | 0.01  | 0.01 | 0    | 0    | 0     | 0    | 0     | 0     | 0      |
| 100310872 | 'Dynlt1a'        | 12.37 | 8.28  | 14.9 | 0    | 6.1  | 5.55  | 4.91 | 7.68  | 13.28 | 6.43   |

|           |                |       |       |      |      |      |       |      |       |       |        |
|-----------|----------------|-------|-------|------|------|------|-------|------|-------|-------|--------|
| 100317    | 'AU040320'     | 12.53 | 22.27 | 19.8 | 9.63 | 8.39 | 6.02  | 11.9 | 11.11 | 14.27 | 39.11  |
| 100336    | 'Ppp1r8'       | 35.8  | 46.71 | 36.3 | 48.2 | 40.1 | 15.93 | 30.3 | 54.53 | 56.87 | 46.14  |
| 100340    | 'Smpdl3b'      | 11.89 | 4.66  | 7.64 | 0    | 15.5 | 11.23 | 0.03 | 2.94  | 0     | 9.44   |
| 100342    | 'Tent5b'       | 0     | 0.77  | 0    | 0    | 0    | 0     | 0    | 0     | 0     | 0      |
| 100383    | 'Bsdcl'        | 36.21 | 19.93 | 28.5 | 38.5 | 14   | 13.87 | 20.8 | 11.36 | 14.27 | 12.7   |
| 100384868 | 'Gm37013'      | 3.64  | 0.44  | 0.8  | 0.88 | 0.11 | 0.06  | 0.47 | 5.61  | 0.96  | 0.82   |
| 100416706 | 'Zfp729b'      | 1.95  | 1.16  | 1.19 | 0    | 5.07 | 0.01  | 2.08 | 0.55  | 0.76  | 0      |
| 100417514 | 'Adh6b'        | 0.79  | 0     | 0    | 0    | 0    | 0     | 0    | 0     | 0     | 0.02   |
| 100434    | 'Slc44a1'      | 0.02  | 2.21  | 4.1  | 4.1  | 4.43 | 1.67  | 5.08 | 1.58  | 0.66  | 1.27   |
| 100463512 | 'Gm20594'      | 524.4 | 378.1 | 487  | 376  | 679  | 822   | 507  | 195   | 300.8 | 447.85 |
| 100465    | 'Mob3c'        | 4.5   | 5.83  | 7.1  | 0.14 | 0.75 | 6.42  | 0    | 6.7   | 3.14  | 6.38   |
| 100494    | 'Zfand2a'      | 20.93 | 23.97 | 28.7 | 19.4 | 19.4 | 12.41 | 21.4 | 25.28 | 10.16 | 23.27  |
| 100502590 | 'Tex50'        | 0.96  | 0.89  | 1.94 | 0.25 | 1.55 | 1.1   | 0.44 | 1.18  | 0.23  | 0.42   |
| 100502698 | 'Rubcn'        | 7.02  | 6.7   | 12.9 | 10.6 | 7.82 | 3.26  | 16.9 | 11.95 | 17.2  | 11.4   |
| 100502736 | 'Gm19345'      | 13.49 | 13.46 | 2.8  | 0    | 0    | 8.67  | 0    | 11.38 | 8.5   | 19.98  |
| 100502766 | 'Kifc1'        | 1.73  | 2.49  | 0.38 | 0    | 0    | 0.41  | 2.36 | 0.03  | 0.26  | 0      |
| 100502777 | 'Gm38422'      | 0     | 1.41  | 1.52 | 0    | 0.18 | 0.31  | 1.15 | 2.5   | 5.27  | 0      |
| 100502825 | 'Rpl37rt'      | 0.36  | 0.6   | 0.61 | 2.23 | 3.29 | 1.54  | 0.61 | 0.51  | 0.38  | 0.39   |
| 100502841 | 'Epg5'         | 1.29  | 1.46  | 2.96 | 8.12 | 0.5  | 0.29  | 3.61 | 1.41  | 2.8   | 1.54   |
| 100502846 | 'Gm19410'      | 0     | 0     | 0    | 0    | 0    | 0.02  | 0    | 0.03  | 0.01  | 0      |
| 100502861 | 'Ccdc13'       | 1.79  | 3.35  | 0.02 | 0    | 3.84 | 3.47  | 8.03 | 0     | 0     | 1.66   |
| 100502876 | 'Kcnmb3'       | 0     | 0.31  | 0.34 | 0.76 | 0.19 | 0.03  | 2.3  | 0     | 0.98  | 0.25   |
| 100502921 | 'Gm10142'      | 0     | 2.79  | 0    | 0    | 0    | 0     | 0    | 0     | 0     | 0      |
| 100502940 | 'Colca2'       | 0     | 2.52  | 0    | 0    | 0    | 0     | 0    | 0     | 0     | 2.69   |
| 100502941 | 'Gm17353'      | 0     | 0.05  | 0.13 | 0.03 | 0    | 0     | 0    | 0.04  | 0     | 0      |
| 100502950 | 'Gm3336'       | 0     | 0     | 0    | 0    | 0    | 0     | 0    | 0.11  | 0     | 0.38   |
| 100502955 | 'Gm19470'      | 0     | 0.25  | 0    | 0    | 0    | 0     | 0    | 0     | 0     | 0      |
| 100502967 | 'Speer4c'      | 0.05  | 0.04  | 0    | 0    | 0.13 | 0.44  | 0.09 | 0.14  | 0     | 0      |
| 100503041 | 'Pdzd7'        | 0.01  | 0.91  | 0.04 | 0    | 2.89 | 10.62 | 2.04 | 0     | 0.07  | 1.04   |
| 100503043 | 'Armxc4'       | 1.19  | 2.89  | 2.5  | 4.53 | 2.45 | 1.72  | 1.87 | 3.13  | 0.91  | 2.03   |
| 100503085 | 'Klhl3'        | 1.36  | 3.92  | 0.03 | 1.78 | 0.19 | 6.72  | 2.1  | 2.05  | 4.3   | 2.41   |
| 100503185 | 'Btd8'         | 0.72  | 0     | 3.36 | 0.83 | 0.18 | 0     | 0    | 0     | 2.42  | 0      |
| 100503240 | 'Trpc5os'      | 0     | 0     | 0    | 0    | 0    | 0     | 0    | 0.45  | 0     | 3.15   |
| 100503280 | 'Gm38425'      | 0.74  | 0     | 0    | 0    | 0    | 0     | 0    | 0     | 0     | 0      |
| 100503311 | 'Pifo'         | 3.1   | 1.38  | 4.7  | 12.6 | 50.8 | 0     | 0    | 0     | 0     | 25.13  |
| 100503353 | 'Gm14440'      | 12.53 | 18.02 | 16.4 | 11.3 | 18.2 | 20.1  | 13.5 | 19.78 | 10.46 | 15.31  |
| 100503355 | 'Zfp648'       | 1.23  | 1.4   | 0    | 0.03 | 1.37 | 0     | 5.72 | 0.77  | 0     | 0      |
| 100503361 | 'Tmem95'       | 0     | 1.64  | 0    | 0    | 0    | 1.32  | 0    | 0     | 0     | 1.1    |
| 100503386 | 'Tpbgl'        | 1.65  | 0.17  | 0.42 | 0.54 | 2.22 | 0     | 0    | 0.2   | 0     | 0      |
| 100503545 | 'Nuggc'        | 0     | 0     | 0    | 0    | 0    | 0     | 4.8  | 0     | 0     | 0      |
| 100503549 | 'Gm10354'      | 0     | 0     | 0.06 | 0.08 | 0    | 0     | 0.91 | 0.12  | 0.14  | 0      |
| 100503572 | 'Bbip1'        | 13.89 | 32.29 | 17.3 | 21   | 28.1 | 17.15 | 25.2 | 24.61 | 15.15 | 18.66  |
| 100503583 | 'Fsbp'         | 0     | 0     | 0    | 0    | 0.33 | 0     | 0    | 0     | 0     | 0.68   |
| 100503584 | 'Zfp534'       | 0     | 0     | 0    | 0.03 | 0    | 0.36  | 0    | 0     | 0     | 0.03   |
| 100503605 | 'Hbb-bs'       | 2.02  | 0     | 6.17 | 81.7 | 0.08 | 0     | 7.42 | 13.75 | 29.53 | 6.43   |
| 100503659 | 'Cbarp'        | 113.4 | 90.31 | 69.6 | 69.8 | 117  | 39.51 | 67.2 | 140.4 | 181.1 | 107.85 |
| 100503670 | 'Rpl5'         | 149.1 | 142.2 | 144  | 165  | 176  | 98.31 | 172  | 139.8 | 135.7 | 151.59 |
| 100503710 | 'Gm5741'       | 0.33  | 0.18  | 0    | 1.07 | 0.18 | 0     | 0    | 0     | 0.48  | 0      |
| 100503884 | 'Ccdc149'      | 1.82  | 8.46  | 1.82 | 8.15 | 3.08 | 2.72  | 6.22 | 7.37  | 2.47  | 6.23   |
| 100503890 | 'Pet100'       | 16.43 | 16.05 | 35.2 | 33.5 | 28.4 | 58.99 | 24.6 | 21.65 | 18.07 | 21.5   |
| 100503915 | 'Smpd5'        | 1.07  | 0     | 1.59 | 0    | 0    | 0     | 0    | 0     | 0     | 0      |
| 100503949 | 'Zfp965'       | 0     | 0     | 0    | 0    | 0    | 0.32  | 0    | 0     | 0     | 0      |
| 100504112 | 'Ccer2'        | 16.28 | 4.74  | 54.7 | 0    | 15.4 | 12.88 | 0    | 9.45  | 32.51 | 5.59   |
| 100504156 | 'Fam181a'      | 12.91 | 17.6  | 3.37 | 12.3 | 5.65 | 3.64  | 0.04 | 5.45  | 0     | 0      |
| 100504180 | 'LOC100504180' | 0     | 0     | 0    | 0    | 0    | 0.78  | 0    | 0     | 0     | 0      |
| 100504183 | 'Krtap16-1'    | 0     | 0.13  | 0    | 0    | 0.18 | 0     | 4.86 | 0     | 0.02  | 2.53   |
| 100504195 | 'Micalcl'      | 0     | 1.8   | 0.72 | 0.31 | 0    | 0     | 0    | 0     | 0     | 0      |
| 100504200 | 'Gm8050'       | 0     | 0     | 0    | 0    | 0    | 0     | 0    | 0.21  | 0     | 0      |

|           |                 |       |       |      |      |      |       |      |       |       |        |
|-----------|-----------------|-------|-------|------|------|------|-------|------|-------|-------|--------|
| 100504234 | 'Cc dc170'      | 0     | 0     | 0    | 0    | 1.68 | 0     | 0    | 0     | 0     | 0      |
| 100504263 | '2210418O10Rik' | 8.31  | 4.12  | 4.68 | 1.38 | 1.76 | 1.13  | 0.62 | 2.82  | 0.43  | 3.06   |
| 100504323 | 'Gm20172'       | 1.21  | 0     | 0.03 | 0    | 2.41 | 0     | 1.99 | 0.31  | 3.14  | 0      |
| 100504429 | 'Spin2d'        | 0.05  | 0     | 0    | 0    | 0    | 0     | 0    | 0     | 0     | 0      |
| 100504446 | 'Prr22'         | 0     | 0     | 2.1  | 0    | 5.08 | 2.07  | 0    | 0     | 1.98  | 3.15   |
| 100504491 | 'Dcdc2b'        | 0     | 1.63  | 0.2  | 0.91 | 3.14 | 3.07  | 0    | 3.17  | 1.7   | 0.83   |
| 100504518 | '3425401B19Rik' | 0     | 0     | 0    | 0    | 0    | 0     | 0    | 0     | 0.01  | 0.02   |
| 100504608 | 'Eef1akmt3'     | 0     | 0.14  | 0    | 0    | 0    | 0.07  | 0    | 0     | 0.07  | 0.52   |
| 100504663 | 'Atg14'         | 8.17  | 4.8   | 8.08 | 7.02 | 3.2  | 2.36  | 11.6 | 7.99  | 2.03  | 5.49   |
| 100504715 | 'Tm ppe'        | 2.28  | 2.81  | 3.4  | 1.6  | 1.26 | 1.74  | 1.92 | 0.73  | 3.61  | 4.97   |
| 100505386 | 'lqschfp'       | 0     | 2.64  | 0    | 0    | 9.62 | 9.72  | 3.52 | 2.75  | 0     | 0      |
| 100505397 | 'Gm20385'       | 1.94  | 0     | 2.28 | 9.44 | 1.64 | 0     | 0.29 | 0.75  | 0.03  | 1.36   |
| 100515    | 'Zfp518b'       | 0.61  | 1.7   | 3.66 | 0.98 | 0.07 | 0     | 1.35 | 1.24  | 1.22  | 1.08   |
| 100529082 | 'Gm11127'       | 3.55  | 2.44  | 2.43 | 1.73 | 7.18 | 3.76  | 2.25 | 3.24  | 6.41  | 3.75   |
| 100532    | 'Rel1'          | 0.01  | 0     | 1.6  | 0    | 0.71 | 0.1   | 0    | 0.22  | 2.65  | 0      |
| 100534273 | 'Fer1l5'        | 0     | 0     | 0.23 | 0    | 0    | 0     | 0.25 | 0.02  | 0.01  | 0.32   |
| 100561    | 'Slc15a4'       | 13.7  | 9.2   | 10.1 | 27.3 | 10.9 | 0.37  | 13.6 | 3.94  | 27.27 | 4.4    |
| 100604    | 'Lrrc8c'        | 7.42  | 4.47  | 4.23 | 12.3 | 3.17 | 3.81  | 16.6 | 5.41  | 0.6   | 0.18   |
| 100608    | 'Noc4l'         | 23.35 | 25.87 | 29.3 | 29.2 | 27.5 | 18.15 | 24.7 | 18.24 | 21.01 | 15.79  |
| 100609    | 'Nsun5'         | 5.8   | 15.29 | 9.69 | 21.1 | 6.97 | 5.01  | 4.14 | 17.06 | 11.57 | 10.24  |
| 100637    | 'N4bp21l'       | 46.41 | 29.26 | 26.6 | 37.9 | 40.6 | 40.93 | 24.2 | 31.21 | 75.79 | 72.01  |
| 100678    | 'P sph'         | 12.35 | 0.66  | 13.1 | 7.4  | 11.7 | 13.69 | 13.3 | 12.38 | 16.36 | 6.2    |
| 100683    | 'Trrap'         | 3.8   | 5.19  | 6.81 | 3.49 | 4.83 | 6.4   | 3.84 | 3.25  | 3.82  | 6.21   |
| 100702    | 'Gbp6'          | 0     | 0.42  | 2.11 | 6.23 | 2.94 | 0     | 0    | 0     | 1.54  | 0.09   |
| 100705    | 'Acacb'         | 0.58  | 0.48  | 0.33 | 0.36 | 0.9  | 3.36  | 2.75 | 1.78  | 0.87  | 1.06   |
| 100710    | 'Pds5b'         | 9.72  | 5.35  | 8.12 | 11.4 | 7.8  | 4.31  | 8.29 | 3.98  | 8.24  | 7.58   |
| 100715    | 'Tent2'         | 18.16 | 10.73 | 8.26 | 18   | 6.74 | 13.98 | 5.66 | 18.44 | 10.57 | 2.43   |
| 100732    | 'Mapre3'        | 258.5 | 249.7 | 232  | 154  | 266  | 278.5 | 272  | 268.4 | 219.9 | 268.69 |
| 100737    | 'Dcun1d4'       | 49.44 | 47.41 | 46.2 | 28.2 | 38.8 | 13.97 | 51.6 | 65.87 | 36.02 | 31.2   |
| 100756    | 'Usp30'         | 9.77  | 6.67  | 6.24 | 0.95 | 3    | 3.84  | 0    | 3.01  | 8.31  | 0.75   |
| 100763    | 'Ube3c'         | 5.99  | 6.08  | 9.91 | 0.73 | 8.6  | 3.69  | 7.27 | 6.56  | 1.09  | 4.25   |
| 100764    | 'Rita1'         | 6.01  | 9.97  | 20.1 | 0.04 | 16.8 | 12.28 | 9.26 | 10.57 | 14.23 | 5.02   |
| 100855    | 'Tbc1d14'       | 19.73 | 15.36 | 11.8 | 17.2 | 18.7 | 10.86 | 6.16 | 6.45  | 7.97  | 19.91  |
| 100859931 | 'Gm20604'       | 23.04 | 22.65 | 17.8 | 23.6 | 5.84 | 13.21 | 13.9 | 24.58 | 21.04 | 21     |
| 100861615 | 'LOC100861615'  | 4.85  | 2.86  | 5.41 | 4.32 | 3.19 | 3.71  | 3.31 | 6.49  | 6.8   | 3.44   |
| 100861668 | 'Gm21119'       | 0.05  | 0     | 0.23 | 1.21 | 0.03 | 0.03  | 0.18 | 0     | 0     | 0.01   |
| 100861702 | 'Gm21149'       | 0.05  | 0.03  | 0.08 | 0    | 0.04 | 0.91  | 4.53 | 0.05  | 0     | 0.03   |
| 100861708 | 'Gm21154'       | 0     | 0     | 0.03 | 0    | 0.43 | 0     | 0    | 0     | 0     | 0      |
| 100861719 | 'Gm21162'       | 0     | 0     | 0.5  | 0    | 0.45 | 0     | 0    | 0     | 0     | 0.01   |
| 100861753 | 'Gm21188'       | 0.08  | 0     | 0.03 | 0.2  | 0.06 | 0.08  | 0.06 | 0     | 0     | 0      |
| 100861755 | 'Gm21190'       | 0     | 0     | 0    | 0    | 0    | 1.39  | 0.39 | 0     | 0     | 0      |
| 100861879 | 'Gm21292'       | 0     | 0     | 0    | 0    | 0    | 0     | 0    | 0     | 0.38  | 0      |
| 100861899 | 'Gm21310'       | 0     | 0     | 0    | 0    | 0    | 0.01  | 0    | 0     | 0     | 0      |
| 100861908 | 'Gm21319'       | 0.02  | 0     | 0    | 0.1  | 0    | 0     | 0    | 0     | 0     | 0.05   |
| 100861969 | 'LOC100861969'  | 0     | 0.04  | 0    | 0    | 0    | 0     | 0    | 0     | 0     | 0      |
| 100861978 | 'LOC100861978'  | 1.13  | 1.73  | 4.81 | 1.95 | 0    | 2.98  | 0    | 5.11  | 8.35  | 4.25   |
| 100862043 | 'LOC100862043'  | 0     | 0.06  | 0    | 0    | 0    | 0     | 1.3  | 0     | 0     | 0      |
| 100862066 | 'Cfap99'        | 0.59  | 0     | 0.68 | 3.07 | 0.03 | 0.29  | 0.76 | 0     | 0.6   | 0.18   |
| 100862072 | 'Gm21451'       | 0     | 0.07  | 0    | 0    | 0    | 0     | 0    | 0     | 0     | 0      |
| 100862085 | 'Gm16867'       | 2.16  | 0     | 0.99 | 2.52 | 3.97 | 2.64  | 3.02 | 0.61  | 0.03  | 0.24   |
| 100862192 | 'LOC100862192'  | 0     | 0     | 0    | 0    | 0    | 0     | 0    | 0     | 0.04  | 0      |
| 100862203 | 'Gm6712'        | 5.45  | 0.54  | 0.6  | 0    | 7.12 | 8.5   | 9.23 | 1.24  | 4.34  | 3.55   |
| 100862247 | 'Gm21586'       | 1.66  | 2.89  | 1.05 | 7.47 | 2.24 | 3.4   | 2.53 | 2.55  | 1.84  | 5.29   |
| 100862261 | 'Fam205a3'      | 0.73  | 0.21  | 0.05 | 0.3  | 0.31 | 0.36  | 0.07 | 0.14  | 1.72  | 0.07   |
| 100862314 | 'Gm21637'       | 0     | 0     | 0    | 0    | 0    | 0     | 0    | 0.03  | 0     | 0      |
| 100862324 | 'LOC100862324'  | 0.44  | 0.12  | 0.25 | 0    | 0.29 | 0.02  | 0.25 | 0     | 1.04  | 0.23   |
| 100862345 | 'Gm21660'       | 0     | 0     | 0    | 0    | 0    | 0.01  | 0    | 0     | 0     | 0      |
| 100862348 | 'Gm9295'        | 1.5   | 0.98  | 1.1  | 1.78 | 0.87 | 0.25  | 2.42 | 0.72  | 2.28  | 0.36   |

|           |                |       |       |      |      |      |       |      |       |       |        |
|-----------|----------------|-------|-------|------|------|------|-------|------|-------|-------|--------|
| 100862349 | 'Gm21663'      | 0.17  | 0.33  | 0.31 | 0    | 0.26 | 0     | 0    | 0.04  | 0     | 0      |
| 100862359 | 'Gm21671'      | 0.03  | 0.06  | 0    | 0    | 0    | 0     | 0    | 0     | 0     | 0.28   |
| 100862368 | 'Gm21680'      | 0.06  | 1.6   | 1.71 | 0    | 4.5  | 1.09  | 1.11 | 0.96  | 1.64  | 2.12   |
| 100862369 | 'Btbd35f9'     | 0     | 0     | 0.37 | 0    | 0    | 0     | 0    | 0     | 0     | 0      |
| 100862375 | 'Entpd4b'      | 24.06 | 25.76 | 50.2 | 10   | 20.4 | 40.65 | 61.3 | 21.82 | 38.57 | 9.79   |
| 100862388 | 'Gm21698'      | 0.02  | 0     | 0.04 | 0    | 0    | 1.48  | 0    | 0.19  | 0     | 0.13   |
| 100862433 | 'LOC100862433' | 0.64  | 0.31  | 0.53 | 0.48 | 0.24 | 0.57  | 0.17 | 0.14  | 0.62  | 0.7    |
| 100862446 | 'LOC100862446' | 3.32  | 5.97  | 3.97 | 9.91 | 3.6  | 4.79  | 5.61 | 4.73  | 5.57  | 5.58   |
| 100862455 | 'LOC100862455' | 139.1 | 133.1 | 149  | 158  | 138  | 185.6 | 141  | 102.8 | 176.7 | 134.73 |
| 100900    | 'Hscb'         | 19.03 | 14.69 | 7.68 | 20.8 | 2.65 | 21.22 | 22.7 | 8.72  | 11.15 | 18.16  |
| 100910    | 'Chpf2'        | 18.79 | 14.79 | 22.3 | 3.99 | 28.7 | 5.18  | 19.5 | 27.79 | 6.23  | 26.1   |
| 100929    | 'Tyw1'         | 6.73  | 13.43 | 22.4 | 7.51 | 7.86 | 1.55  | 9.09 | 18.69 | 10.09 | 10.19  |
| 100952    | 'Emilin1'      | 0     | 0     | 0    | 0    | 4.96 | 0     | 0    | 0     | 1.88  | 0      |
| 100972    | 'Rab28'        | 61.19 | 64.4  | 47   | 51.3 | 69.4 | 43.94 | 59.8 | 33.61 | 71.52 | 38.86  |
| 100978    | 'Nfxl1'        | 0.39  | 0     | 0.85 | 0.28 | 0.03 | 0.01  | 0    | 0.06  | 1.75  | 0.41   |
| 100986    | 'Akap9'        | 11.6  | 12.18 | 8.79 | 15.4 | 12   | 12.74 | 14.1 | 11.98 | 18.34 | 15.94  |
| 101023    | 'Zfp513'       | 2.24  | 3.54  | 0.41 | 0    | 0.72 | 1.71  | 0    | 0.16  | 0     | 1.62   |
| 101055630 | '101055630'    | 2.88  | 29.63 | 22.3 | 22.3 | 35.1 | 2.85  | 9.06 | 7.23  | 19.1  | 16.37  |
| 101055663 | 'LOC101055663' | 0     | 1.57  | 1.4  | 0    | 0    | 0     | 0    | 0     | 0     | 0      |
| 101055671 | 'Lipo2'        | 0.18  | 0.13  | 0    | 0    | 0.09 | 0     | 0.03 | 0.29  | 0.67  | 0.09   |
| 101055672 | 'LOC101055672' | 0     | 0     | 0.04 | 0.05 | 0    | 0     | 0    | 0     | 0     | 0      |
| 101055676 | 'LOC101055676' | 0     | 0     | 0.4  | 0    | 0    | 0.47  | 4.46 | 1.17  | 3.47  | 0.11   |
| 101055754 | 'Gm2974'       | 1.61  | 0.12  | 0.56 | 0.65 | 1.38 | 0.85  | 0.04 | 2.16  | 0.32  | 1.43   |
| 101055758 | 'LOC101055758' | 0     | 0.9   | 0.09 | 0    | 0    | 0     | 0    | 0     | 0     | 0      |
| 101055806 | 'Gm10378'      | 0     | 0     | 0.59 | 0    | 0.36 | 0.66  | 0    | 0     | 0     | 0.12   |
| 101055837 | 'Gm38434'      | 0     | 0.12  | 0    | 0    | 0    | 0     | 0    | 0     | 0     | 0      |
| 101055854 | 'Gm29733'      | 0.59  | 2.26  | 3.64 | 27.1 | 0    | 0.05  | 6.66 | 1.69  | 2.47  | 0      |
| 101055864 | 'LOC101055864' | 0     | 0     | 0.02 | 0    | 0    | 0     | 0    | 0     | 0.47  | 0      |
| 101055907 | 'Gm15246'      | 18.13 | 5.68  | 2.58 | 0    | 11.4 | 1.93  | 5.72 | 5.9   | 2.65  | 7.94   |
| 101055987 | 'Gm29758'      | 0.37  | 0.45  | 2.38 | 4.27 | 0.31 | 0     | 0.12 | 0.96  | 0.57  | 0.08   |
| 101056073 | 'Zfp990'       | 0     | 0     | 0    | 0    | 0    | 0.14  | 0    | 0     | 0     | 0      |
| 101056102 | 'Gm29779'      | 1.47  | 0.24  | 2.11 | 0    | 0    | 0     | 18.3 | 4.31  | 0     | 6.32   |
| 101056115 | 'LOC101056115' | 0     | 0     | 0    | 0.01 | 0    | 0     | 0    | 0     | 0.01  | 0      |
| 101056159 | 'LOC101056159' | 0     | 0     | 0.49 | 0    | 1.87 | 0     | 0    | 0.41  | 0     | 0      |
| 101056205 | 'Gm29797'      | 0     | 0     | 0    | 0    | 0    | 2.26  | 0    | 0     | 0     | 0      |
| 101056210 | 'Gm28576'      | 0     | 0     | 0    | 0    | 0    | 0     | 0    | 0.23  | 0     | 0      |
| 101056241 | 'Gm29808'      | 0     | 0.03  | 0    | 0    | 0    | 0     | 0    | 0     | 0     | 0      |
| 101056296 | 'LOC101056296' | 0     | 0.04  | 0    | 0    | 0.08 | 0.03  | 0.06 | 0     | 0     | 0      |
| 101056300 | 'LOC101056300' | 0     | 0.04  | 0    | 0    | 0.08 | 0.03  | 0.06 | 0     | 0     | 0      |
| 101056408 | 'Gm15816'      | 0     | 0.16  | 1.11 | 0    | 0    | 0     | 0    | 0.75  | 0     | 0      |
| 101095    | 'Zfp282'       | 4.89  | 1.16  | 2.67 | 3.74 | 4.05 | 1.5   | 3.15 | 0.99  | 0     | 0.73   |
| 101100    | 'Tll3'         | 5.88  | 7.71  | 9.8  | 4.02 | 13.7 | 8.41  | 1.35 | 0     | 5.53  | 6.25   |
| 101113    | 'Snx21'        | 13.5  | 17.56 | 11.6 | 15.4 | 12.1 | 5.67  | 6    | 16.11 | 28.2  | 12.81  |
| 101118    | 'Tmem168'      | 3.09  | 2.32  | 0.85 | 1.56 | 5.45 | 0.23  | 0    | 2.77  | 1.82  | 7.43   |
| 101122    | 'Rpusd3'       | 11.21 | 12.22 | 10.2 | 7.25 | 5.95 | 17.7  | 15.8 | 3.37  | 21    | 15.78  |
| 101142    | 'lftg2'        | 45.61 | 22.18 | 29.7 | 36.8 | 25.7 | 39.82 | 33   | 30.67 | 44.8  | 35.49  |
| 101148    | 'Bmt2'         | 4.04  | 0.98  | 0.08 | 1.43 | 1.91 | 0.22  | 0.41 | 0.13  | 1.4   | 2.53   |
| 101185    | 'Pot1a'        | 3.53  | 21.54 | 6.26 | 2.41 | 0.96 | 9.41  | 4.48 | 10.82 | 7.36  | 11.75  |
| 101187    | 'Parp11'       | 12.75 | 8.97  | 5.25 | 0.01 | 8.97 | 7.47  | 19.9 | 9.29  | 19.9  | 15.74  |
| 101197    | 'Zfp956'       | 14.14 | 5.6   | 6.4  | 12.3 | 2.51 | 1.59  | 7.23 | 27    | 15.49 | 10.16  |
| 101202    | 'Hepacam2'     | 0     | 0     | 0    | 0    | 0    | 0.77  | 0    | 0.13  | 0     | 0.32   |
| 101206    | 'Tada3'        | 13.24 | 35.94 | 15.5 | 31.8 | 37.1 | 20.58 | 20.7 | 29.78 | 20.89 | 24.11  |
| 101214    | 'Tra2a'        | 47.29 | 52.49 | 45.5 | 23.8 | 28.9 | 50.22 | 30.7 | 35.3  | 45.01 | 42.99  |
| 101240    | 'Wdr91'        | 8.62  | 4.37  | 3.79 | 7.16 | 6.33 | 7.29  | 0.09 | 4.53  | 6.42  | 2.97   |
| 101314    | 'Brk1'         | 263.2 | 256.1 | 212  | 200  | 231  | 337.5 | 223  | 188.4 | 160.1 | 242.67 |
| 101351    | 'Eogt'         | 7.39  | 0.4   | 7.93 | 6.51 | 4.53 | 0.06  | 0    | 1.33  | 3.22  | 3.15   |
| 101358    | 'Fbxl14'       | 1.7   | 0.64  | 0.62 | 0    | 1.34 | 0.8   | 1.61 | 0.6   | 0.75  | 0.03   |
| 101359    | 'Prnt4'        | 0     | 0.75  | 2.8  | 1.24 | 1.17 | 0.01  | 2.91 | 0.13  | 0.38  | 0.49   |

|           |                 |       |       |      |      |      |       |      |       |       |        |
|-----------|-----------------|-------|-------|------|------|------|-------|------|-------|-------|--------|
| 101401    | 'Adamts9'       | 0     | 0.41  | 0.02 | 0.03 | 0    | 0.01  | 0    | 0.12  | 0     | 0      |
| 101434    | 'Ceacam15'      | 0     | 0     | 0.11 | 0    | 0    | 0     | 0    | 0     | 0     | 0      |
| 101437    | 'Dhx32'         | 15.34 | 21.5  | 8    | 4.87 | 11.4 | 6.95  | 6.74 | 13.65 | 11.54 | 7.37   |
| 101471    | 'Phrf1'         | 2.01  | 4.3   | 3.71 | 4.62 | 8.46 | 4.66  | 5.58 | 2.24  | 2.53  | 5.4    |
| 101476    | 'Plekha1'       | 16.73 | 9.49  | 9.13 | 12.5 | 4.79 | 6.61  | 11.6 | 10.73 | 13.25 | 8.86   |
| 101488    | 'Slco2b1'       | 0     | 0     | 0    | 0    | 0    | 0.8   | 0.36 | 0     | 0.72  | 0      |
| 101488143 | 'Hbb-bt'        | 0.16  | 3.37  | 0    | 11.6 | 0    | 0.95  | 0    | 6.67  | 0     | 0      |
| 101489    | 'Ric8a'         | 33.55 | 26.76 | 52.2 | 18.9 | 24.5 | 25.11 | 25.9 | 30.53 | 53.87 | 37.61  |
| 101490    | 'Inpp5f'        | 65.72 | 66.58 | 111  | 83.1 | 60   | 61.96 | 69.9 | 99.72 | 75.92 | 59.77  |
| 101497    | 'Plekhg2'       | 0     | 0     | 0    | 0    | 0    | 0     | 0    | 0     | 0     | 0.01   |
| 101502    | 'Hsd3b7'        | 6.46  | 10.78 | 0    | 0.03 | 11.3 | 12.32 | 21.2 | 7.11  | 15.82 | 14.71  |
| 101513    | 'Mob2'          | 57.51 | 44.48 | 36   | 9.74 | 65   | 37.94 | 34.4 | 33.43 | 50.42 | 27.33  |
| 101540    | 'Prkd2'         | 1.62  | 0.48  | 0.05 | 1.78 | 0.05 | 0     | 7.4  | 0     | 4.31  | 2.43   |
| 101543    | 'Wtip'          | 0     | 1.28  | 0.02 | 0    | 0    | 0     | 3.02 | 3.15  | 1.22  | 0      |
| 101544    | 'Zfp575'        | 14.44 | 15.32 | 12.4 | 16.8 | 8.52 | 22.63 | 16.6 | 17.64 | 11.09 | 5.24   |
| 101565    | 'Ccp110'        | 7.12  | 5.33  | 6.08 | 6.76 | 3.77 | 3.73  | 4.59 | 6.41  | 3.18  | 6.29   |
| 101568    | 'Vrk3'          | 31.5  | 21.34 | 33.6 | 43.7 | 28.3 | 35.77 | 22.4 | 22    | 26.79 | 12.27  |
| 101592    | 'Efl1'          | 0.78  | 7.45  | 2.02 | 10.5 | 6.74 | 3.32  | 1.89 | 4.68  | 9.44  | 10.24  |
| 101602    | 'Al467606'      | 15.69 | 21.1  | 3.82 | 18.2 | 3.97 | 11.35 | 0.05 | 18.8  | 0.07  | 31.64  |
| 101604    | 'E430018J23Rik' | 3.17  | 2.69  | 0    | 5.19 | 1.74 | 7.42  | 6.54 | 5.58  | 9.83  | 7.13   |
| 101612    | 'Grwd1'         | 25.33 | 29.4  | 29.9 | 28.8 | 32.5 | 51.24 | 68   | 47.38 | 52.68 | 21.37  |
| 101613    | 'Nlrp6'         | 0     | 0     | 0.01 | 0    | 0    | 0.49  | 0    | 0     | 0     | 0      |
| 101631    | 'Pwwp2b'        | 0.53  | 0     | 0    | 0    | 8.77 | 7.65  | 0    | 0     | 4.17  | 0      |
| 101685    | 'Spty2d1'       | 3.5   | 2.69  | 3.9  | 7.12 | 1.39 | 3.26  | 3.89 | 3.08  | 1.94  | 2.27   |
| 101700    | 'Trim68'        | 5.13  | 0     | 0    | 0    | 2.93 | 3.49  | 0    | 2.84  | 0     | 0      |
| 101706    | 'Numa1'         | 5.38  | 4.51  | 6.07 | 8.62 | 7.24 | 7.05  | 5.52 | 4.06  | 4.45  | 7.43   |
| 101739    | 'Psip1'         | 19.96 | 15.43 | 18.9 | 30.5 | 13.5 | 19.21 | 29   | 18.66 | 31.14 | 11.31  |
| 101744    | 'Acp7'          | 0     | 0     | 0    | 0    | 1.22 | 0     | 0    | 0     | 0     | 0      |
| 101772    | 'Ano1'          | 0.01  | 0     | 4.07 | 0.1  | 5.52 | 0.09  | 0    | 1.42  | 2.49  | 1.92   |
| 101809    | 'Spred3'        | 5.42  | 3.12  | 2.26 | 10   | 3.75 | 4.45  | 5.38 | 3.68  | 5.45  | 2.22   |
| 101831    | 'Faap24'        | 2.35  | 1.43  | 3    | 13.6 | 13.8 | 4.5   | 4.28 | 5.43  | 17.93 | 8.58   |
| 101835    | 'AW146154'      | 5.5   | 1.92  | 0.88 | 0    | 5.59 | 0     | 0    | 1.14  | 0.4   | 2.32   |
| 101861    | 'Ints4'         | 13.61 | 17.42 | 13.7 | 22.4 | 11.1 | 7.19  | 9.68 | 12.17 | 10.21 | 16.35  |
| 101867    | 'Rrp8'          | 0     | 8.06  | 8.77 | 10.2 | 9.36 | 5.51  | 3.37 | 12.42 | 7.49  | 2.74   |
| 101869    | 'Unc45a'        | 17.52 | 13.72 | 9.56 | 28.3 | 19.9 | 4.53  | 13.6 | 15.23 | 3.61  | 15.18  |
| 101883    | 'Igf1r1'        | 4.28  | 6.72  | 5.65 | 6.57 | 14.1 | 4.71  | 4.76 | 3.33  | 4.54  | 5.65   |
| 101943    | 'Sf3b3'         | 26.33 | 22.9  | 26.7 | 11.6 | 12.7 | 9.44  | 39   | 23.83 | 19.38 | 29.17  |
| 101966    | 'D8Ertd738e'    | 259.7 | 185.4 | 229  | 362  | 293  | 252.4 | 158  | 185.2 | 320.1 | 220.38 |
| 101985    | 'Usb1'          | 13.57 | 8.16  | 17.2 | 13.2 | 14.5 | 15.09 | 13.5 | 8.51  | 26.43 | 5.5    |
| 101994    | 'Champ1'        | 11.01 | 8.13  | 10.7 | 10.4 | 4.78 | 2     | 11.4 | 5.82  | 8.52  | 17.81  |
| 102032    | 'Smim19'        | 47.17 | 31.55 | 27.5 | 38.6 | 23.9 | 74.89 | 98.9 | 18.84 | 31.22 | 29.83  |
| 102058    | 'Exoc8'         | 2.64  | 4.33  | 1.6  | 1.29 | 3.81 | 1.33  | 2.97 | 2.88  | 2.91  | 6.6    |
| 102060    | 'Gadd45gip1'    | 77.07 | 61.13 | 79.7 | 63.4 | 111  | 90.18 | 80.3 | 83.81 | 98.42 | 74.91  |
| 102075    | 'Plekhg4'       | 3.48  | 0.48  | 0.6  | 0    | 0    | 1.66  | 0    | 0.11  | 0     | 2.54   |
| 102093    | 'Phkb'          | 7.88  | 4.98  | 1.89 | 5.04 | 7.05 | 2.46  | 5.73 | 4.55  | 9.55  | 2.59   |
| 102098    | 'Arhgef18'      | 1.61  | 3.11  | 9.69 | 7.4  | 8.35 | 3.27  | 7.16 | 3.82  | 6.94  | 8.41   |
| 102103    | 'Mtus1'         | 18.3  | 10.9  | 3.61 | 2.93 | 10.2 | 1.08  | 6.31 | 17.54 | 6.15  | 6.33   |
| 102115    | 'Dohh'          | 82.58 | 117.2 | 109  | 112  | 146  | 169.4 | 150  | 132.5 | 122.3 | 131.81 |
| 102122    | 'Fam192a'       | 28.55 | 30.36 | 32.7 | 28.7 | 35.1 | 26.98 | 41.6 | 41.41 | 55.33 | 62.44  |
| 102124    | 'Enkd1'         | 12.36 | 18.81 | 13.7 | 2.67 | 19.4 | 4.68  | 28.1 | 10.03 | 7.57  | 3.79   |
| 102141    | 'Snx25'         | 2.42  | 4.07  | 4.61 | 1.23 | 0.62 | 0     | 0    | 1.73  | 0.41  | 3.54   |
| 102162    | 'Taf5l'         | 1.96  | 3.19  | 5.75 | 4.25 | 3.8  | 0     | 4    | 8.69  | 5.56  | 0      |
| 102182    | 'Prmt9'         | 3.61  | 1.87  | 5.83 | 14.1 | 7.7  | 9.17  | 9.44 | 9.54  | 0.37  | 2.98   |
| 102193    | 'Zdhhc7'        | 15.83 | 4.93  | 22.4 | 17.1 | 6.26 | 3.05  | 6.37 | 7.92  | 7.5   | 3.89   |
| 102209    | 'Snapc2'        | 79.96 | 75.27 | 67.7 | 43.4 | 27.4 | 26.08 | 66.8 | 22.45 | 40.35 | 26.14  |
| 102216272 | 'Ak6'           | 37.11 | 18.67 | 29.4 | 25.8 | 40.7 | 37.98 | 30.7 | 38.01 | 15.99 | 31.18  |
| 102247    | 'Gpat4'         | 34.93 | 35.56 | 34.9 | 40.4 | 28.5 | 26.85 | 18.8 | 28.11 | 30.57 | 29.01  |
| 102278    | 'Cpne7'         | 34.43 | 22.69 | 27.9 | 8.57 | 12.7 | 44.12 | 25.8 | 19.7  | 45.62 | 19.61  |

|           |                 |       |       |      |      |      |       |      |       |       |       |
|-----------|-----------------|-------|-------|------|------|------|-------|------|-------|-------|-------|
| 102294    | 'Cyp4v3'        | 3.93  | 2.24  | 2.2  | 0    | 0    | 0     | 3    | 1.3   | 0     | 0     |
| 102323    | 'Dcun1d2'       | 8.79  | 18.15 | 19.3 | 14.1 | 9.1  | 7.31  | 19   | 13.47 | 1.36  | 1.83  |
| 102334    | 'Ankrd10'       | 52.39 | 87.11 | 42.9 | 64.6 | 43.9 | 65.46 | 60.2 | 47.88 | 40.73 | 63.75 |
| 102339    | 'Cog4'          | 21.31 | 34.77 | 15.5 | 45.6 | 31.4 | 30.99 | 29.8 | 23.5  | 13.95 | 30.08 |
| 102371    | 'Myzap'         | 0.08  | 0     | 0.11 | 0.05 | 0.04 | 0.08  | 0.02 | 0.02  | 0.06  | 0.06  |
| 102414    | 'Clk3'          | 43.87 | 32.72 | 28.5 | 71   | 32.5 | 18.65 | 10.4 | 50.21 | 31.93 | 30.25 |
| 102423    | 'Hinfp'         | 0.58  | 6.58  | 0.62 | 0.01 | 1    | 5.39  | 9.3  | 4.75  | 0.56  | 0.28  |
| 102436    | 'Lars2'         | 8.61  | 12.73 | 11.6 | 4.62 | 1.45 | 2.04  | 0.05 | 7.21  | 2.77  | 8.02  |
| 102442    | 'Dennd4a'       | 1.12  | 1.5   | 1.96 | 1.23 | 1.79 | 2.05  | 0.23 | 0.89  | 1.79  | 1.26  |
| 102443350 | 'Xndc1'         | 8.1   | 3.2   | 5.85 | 5.05 | 5.46 | 6.12  | 6.97 | 2.93  | 0.22  | 4.34  |
| 102443351 | 'Xntrpc'        | 0     | 0     | 1.03 | 0    | 0    | 0     | 0    | 0.32  | 0     | 0     |
| 102448    | 'Xylb'          | 4.01  | 1.78  | 0.09 | 0.12 | 0.34 | 0.12  | 3.92 | 4.13  | 0.02  | 3.08  |
| 102462    | 'Imp3'          | 68.01 | 57.49 | 49.4 | 40.3 | 45.4 | 82.36 | 57.7 | 47.85 | 74.9  | 53.15 |
| 102502    | 'Pls1'          | 4.4   | 6.77  | 0.17 | 0.02 | 6.45 | 3.21  | 0    | 0.56  | 1.88  | 1.48  |
| 102545    | 'Cmtm7'         | 7.55  | 0     | 0    | 0    | 0    | 13.54 | 0    | 0.4   | 0     | 0     |
| 102566    | 'Ano10'         | 13.93 | 11.78 | 4.97 | 3.38 | 18.4 | 17.81 | 19.7 | 16.03 | 18.8  | 18.63 |
| 102570    | 'Slc22a13'      | 0     | 1.17  | 0    | 0    | 0    | 0     | 0    | 0     | 0.32  | 0.53  |
| 102580    | 'Alg9'          | 11.48 | 3.85  | 13.7 | 2.14 | 1.59 | 0.45  | 7.68 | 3.63  | 8.77  | 2.96  |
| 102595    | 'Plekho2'       | 3.67  | 0     | 2.37 | 0    | 1.94 | 0     | 0.14 | 0     | 0     | 0     |
| 102607    | 'Snx19'         | 13.42 | 10.1  | 23.5 | 12.5 | 3.91 | 5.56  | 16.6 | 9.06  | 9.64  | 10.2  |
| 102614    | 'Rpp25'         | 17.63 | 8.46  | 12.6 | 9.46 | 17.6 | 29.39 | 12.2 | 12.26 | 4.81  | 0     |
| 102626    | 'Mapkapk3'      | 2.26  | 2.47  | 0    | 0    | 5.93 | 6.38  | 0    | 0     | 4.1   | 3.48  |
| 102631585 | 'LOC102631585'  | 0.01  | 0     | 0    | 0    | 0    | 0     | 0    | 0     | 0.01  | 0     |
| 102631705 | 'Gm29975'       | 0.52  | 1.92  | 0.27 | 7.48 | 1.67 | 1.24  | 1.24 | 0.07  | 0.72  | 0.69  |
| 102631717 | 'Gm29986'       | 0     | 0     | 0    | 0    | 0.15 | 0     | 0    | 0     | 0     | 0     |
| 102631730 | '4930512M02Rik' | 15.33 | 13.17 | 19.3 | 34.6 | 23.4 | 19.79 | 20.8 | 11.33 | 26.32 | 11.93 |
| 102631805 | 'LOC102631805'  | 0     | 0     | 0    | 0.01 | 0    | 0     | 0    | 0     | 0.01  | 0     |
| 102631909 | 'Gm30124'       | 0     | 0.53  | 0    | 0.04 | 0.59 | 0     | 0.79 | 0.16  | 1     | 0     |
| 102632    | 'Acad11'        | 3.03  | 7.69  | 0    | 7.38 | 5.63 | 0.82  | 4.7  | 11.56 | 5.13  | 4.46  |
| 102632383 | 'LOC102632383'  | 1.5   | 0.45  | 0.05 | 1.88 | 1.39 | 3.2   | 0.24 | 1.22  | 4.45  | 1.24  |
| 102632483 | 'Gm17330'       | 0.2   | 0.12  | 0.68 | 0.28 | 0.21 | 0.16  | 0.75 | 0.15  | 2.43  | 0.19  |
| 102632554 | 'Gm30599'       | 0     | 0     | 0    | 0    | 0.03 | 0     | 0.53 | 0     | 0     | 0     |
| 102632693 | 'Gm30698'       | 0.04  | 0     | 0    | 0    | 0.26 | 0.29  | 0    | 0     | 0.19  | 0.38  |
| 102632737 | 'Gm30732'       | 0     | 0     | 0.02 | 3.02 | 0    | 0     | 0    | 0     | 0.02  | 0     |
| 102632738 | 'Gm30733'       | 0     | 0     | 0.23 | 0    | 0    | 0     | 0    | 0     | 0     | 0     |
| 102632739 | 'Gm19774'       | 0     | 0     | 0.34 | 0.49 | 0    | 0     | 0    | 0     | 0     | 0     |
| 102633032 | '1700064H15Rik' | 0     | 0.02  | 0.06 | 0    | 0.39 | 0     | 0    | 0     | 0.29  | 0     |
| 102633100 | 'Gm7682'        | 0     | 0     | 0    | 0    | 0    | 0     | 0    | 0     | 0.01  | 0     |
| 102633131 | 'Gm31035'       | 0     | 0     | 0    | 0    | 0.22 | 0     | 0    | 0     | 0     | 0     |
| 102633156 | 'LOC102633156'  | 4.74  | 4.27  | 1.04 | 2.36 | 3.27 | 2.05  | 4.03 | 2.42  | 2.29  | 2.2   |
| 102633301 | 'Gm31160'       | 0.03  | 0     | 0    | 0    | 0    | 0     | 0    | 0     | 0     | 0     |
| 102633345 | 'Gm9922'        | 0     | 0     | 0    | 0    | 0    | 0     | 0    | 0     | 0     | 0.02  |
| 102633458 | 'Gm11100'       | 0     | 0     | 0    | 0    | 0.09 | 0     | 0    | 0.3   | 0.08  | 0     |
| 102633498 | 'Gm31309'       | 0.63  | 0.03  | 0    | 0    | 0    | 0     | 0    | 0     | 0     | 0     |
| 102633740 | 'Gm31493'       | 0     | 2.08  | 0    | 0    | 0    | 0     | 0    | 0     | 0     | 0     |
| 102633750 | 'Gm10130'       | 3.81  | 0.17  | 1.54 | 0.11 | 0.16 | 0.04  | 0.11 | 1.78  | 0.19  | 0.09  |
| 102633888 | 'Gm31606'       | 0.45  | 0.42  | 1.47 | 1.62 | 2.28 | 1.07  | 1.81 | 1.35  | 1.32  | 0.57  |
| 102633951 | 'Gm31649'       | 0     | 0     | 1.03 | 0    | 0    | 0     | 0    | 0.26  | 0     | 0     |
| 102634072 | 'Gm38457'       | 0     | 0     | 0    | 0    | 0    | 0.11  | 0    | 0     | 0     | 0     |
| 102634078 | 'LOC102634078'  | 5.97  | 2     | 5.27 | 6.46 | 6.13 | 3.17  | 4.25 | 4.63  | 8.06  | 6.85  |
| 102634296 | 'Gm4779'        | 0     | 0.99  | 0    | 2.9  | 3.35 | 1.57  | 0    | 1.63  | 0     | 0     |
| 102634333 | '1110002E22Rik' | 0     | 0     | 0    | 0    | 0    | 0     | 0    | 0     | 0     | 0     |
| 102634429 | 'Gm6569'        | 0.11  | 0     | 0    | 0    | 0    | 0     | 0    | 0     | 0     | 0.05  |
| 102634529 | 'LOC102634529'  | 0     | 0     | 0    | 0    | 0    | 0     | 0    | 0     | 0.01  | 0     |
| 102634532 | 'Gm3642'        | 0     | 0     | 0    | 0.31 | 0    | 0     | 0    | 0.01  | 0     | 0     |
| 102634581 | 'LOC102634581'  | 0     | 0.75  | 0    | 0    | 0    | 2.01  | 0    | 0     | 2.49  | 0     |
| 102634611 | 'Gm32151'       | 0.53  | 0     | 0    | 0.13 | 2.83 | 0     | 5.01 | 1.59  | 1.08  | 4.46  |
| 102634746 | 'Gm13201'       | 0     | 0     | 0    | 0    | 0.36 | 0     | 0    | 0.03  | 0     | 0.02  |

|           |                 |      |      |      |      |      |      |      |      |      |       |
|-----------|-----------------|------|------|------|------|------|------|------|------|------|-------|
| 102634788 | 'Gm32289'       | 0    | 0    | 1.41 | 0    | 0.11 | 0.85 | 0    | 0    | 1.18 | 0     |
| 102634841 | 'Gm38469'       | 0    | 0    | 0    | 3.89 | 0    | 0    | 0    | 0    | 0.41 | 0     |
| 102634941 | 'Gm29376'       | 0.04 | 0    | 0.01 | 0.02 | 0.07 | 0.22 | 0    | 0.46 | 0    | 0     |
| 102635315 | 'Gm32687'       | 1.09 | 3.41 | 2.67 | 3.77 | 3.14 | 0.78 | 0    | 4.73 | 4.43 | 0.7   |
| 102635360 | 'Gm32719'       | 0.23 | 0    | 0.19 | 0    | 0.08 | 0.09 | 0    | 0.24 | 1.31 | 0.5   |
| 102635385 | 'Gm32742'       | 0    | 0    | 0.01 | 1.31 | 0    | 0    | 0    | 0    | 0    | 0     |
| 102635552 | 'Gm32856'       | 2.48 | 0.03 | 0.53 | 0.05 | 0.77 | 1.28 | 1.78 | 2.63 | 3.43 | 3.65  |
| 102635694 | 'Gm32966'       | 0.55 | 0    | 0.2  | 0    | 0.66 | 0    | 0    | 0    | 0.63 | 0.18  |
| 102635744 | 'Gm28729'       | 0.02 | 2.36 | 0    | 0.02 | 0.02 | 0    | 6.72 | 0.24 | 0    | 1.79  |
| 102635781 | 'Gm38481'       | 5.19 | 1.78 | 6.68 | 8.69 | 6.74 | 1.55 | 3.66 | 6.69 | 2.47 | 5.57  |
| 102635802 | 'Gm33049'       | 0.06 | 0.07 | 0.2  | 0    | 0    | 0    | 0.55 | 0    | 0.3  | 0     |
| 102635879 | '4933407O12Rik' | 1.95 | 0    | 0    | 0    | 0    | 0    | 0.23 | 0    | 0    | 1.08  |
| 102636251 | 'Gm33370'       | 0    | 0    | 0    | 0    | 0.1  | 0    | 0    | 0    | 0    | 0     |
| 102636264 | 'Gm33378'       | 0    | 0    | 0.01 | 0    | 0    | 0    | 0    | 0.03 | 0.01 | 2.65  |
| 102636554 | 'Als2cr11b'     | 0.28 | 0    | 0    | 0    | 0    | 0.04 | 0.82 | 0    | 0    | 0     |
| 102636690 | 'Gm33691'       | 0    | 0    | 0.14 | 3.46 | 0    | 0    | 0    | 0.99 | 0    | 0     |
| 102636907 | 'Gm4275'        | 2.12 | 4.13 | 1.68 | 0    | 0.03 | 0    | 3.35 | 0.08 | 2.88 | 2.15  |
| 102636931 | 'Gm33869'       | 0.46 | 0.06 | 0.56 | 0.38 | 0.73 | 0    | 0.2  | 0.38 | 0.04 | 2.26  |
| 102637020 | 'Gm33933'       | 0.6  | 0.29 | 0.37 | 0    | 0.56 | 0.09 | 0.6  | 1.03 | 0.45 | 0.35  |
| 102637087 | 'Gm33989'       | 0.42 | 0.28 | 0.39 | 0.05 | 0.4  | 0.78 | 0.04 | 0.01 | 1.07 | 0.14  |
| 102637099 | 'Gm38495'       | 2.77 | 2.37 | 1.19 | 5.67 | 1.23 | 2.79 | 2.7  | 2.06 | 3.79 | 0.91  |
| 102637189 | 'Gm34066'       | 0.44 | 0    | 0    | 0    | 0    | 0    | 0    | 0    | 0    | 0     |
| 102637366 | 'Gm10037'       | 1.14 | 8.23 | 0    | 0    | 7.22 | 1.36 | 0.08 | 5.28 | 13.8 | 3.85  |
| 102637400 | 'Gm34220'       | 0.45 | 0.05 | 0.16 | 2.75 | 0.41 | 0.53 | 0.04 | 0.15 | 1.16 | 2.38  |
| 102637572 | 'Gm38499'       | 0    | 1.04 | 0.66 | 0    | 0    | 0    | 0    | 0    | 2.36 | 0     |
| 102637593 | 'Gm34362'       | 0    | 0    | 1.48 | 0    | 0    | 0    | 0    | 0    | 0    | 0     |
| 102637806 | 'LOC102637806'  | 0    | 0    | 0    | 0    | 0.45 | 0    | 0    | 0    | 0    | 0     |
| 102637808 | 'LOC102637808'  | 0.03 | 0    | 0    | 0    | 0    | 0    | 0    | 0    | 0    | 0.03  |
| 102637839 | 'Gm10476'       | 0.06 | 0    | 0.24 | 0.28 | 0    | 0    | 0.4  | 0.17 | 0    | 0     |
| 102638047 | 'LOC102638047'  | 0    | 0.05 | 0.05 | 0.15 | 0.13 | 0    | 0.16 | 0.04 | 0.07 | 0.12  |
| 102638083 | 'Ccdc188'       | 0    | 0    | 0    | 0    | 0    | 0    | 0    | 0.22 | 0.02 | 0     |
| 102638132 | 'Gm34768'       | 0    | 0    | 0.33 | 0    | 0    | 0    | 0    | 0    | 0    | 0     |
| 102638268 | '1700014D04Rik' | 0    | 0    | 0    | 0    | 0    | 0    | 0    | 0    | 0    | 1.68  |
| 102638541 | 'Gm35078'       | 0.04 | 0    | 0    | 0    | 0    | 0    | 0    | 0    | 0    | 0     |
| 102638555 | 'Gm38510'       | 0    | 0.15 | 1.44 | 0.03 | 0    | 0    | 0    | 0    | 0    | 0     |
| 102638674 | 'LOC102638674'  | 0    | 0    | 0    | 0.31 | 0.03 | 0    | 0    | 0.03 | 0    | 0     |
| 102638847 | 'Gm35315'       | 0.25 | 0.34 | 0.57 | 0.29 | 0.4  | 0.07 | 0    | 0.27 | 0.53 | 0.52  |
| 102638882 | 'Gm35339'       | 0    | 0.05 | 0.25 | 0    | 0    | 0    | 0.23 | 0.56 | 0    | 0     |
| 102638888 | 'LOC102638888'  | 0.8  | 0.91 | 0.04 | 0.67 | 2    | 0.99 | 0.09 | 1.3  | 1.55 | 1.58  |
| 102638918 | 'Gm35364'       | 0.73 | 0    | 2.7  | 3.02 | 0.16 | 3.03 | 0    | 0    | 0    | 0.28  |
| 102639021 | 'LOC102639021'  | 1.01 | 0.62 | 2.61 | 0.07 | 0.99 | 0    | 1.27 | 0    | 1.61 | 0.22  |
| 102639037 | 'LOC102639037'  | 0    | 0    | 0.42 | 0    | 0.68 | 0    | 0    | 0    | 0    | 0     |
| 102639132 | 'Gm21885'       | 1.03 | 1.14 | 0.08 | 4.12 | 0.52 | 0.01 | 0.14 | 0.91 | 0.45 | 0.02  |
| 102639178 | 'Gm35549'       | 0    | 0    | 0    | 0    | 2.15 | 0    | 0.04 | 0    | 0    | 2.03  |
| 102639229 | 'Gm35588'       | 0    | 0    | 0.38 | 0    | 0    | 0    | 0    | 0    | 0    | 0     |
| 102639505 | 'LOC102639505'  | 0.35 | 1.36 | 0.94 | 2.67 | 1.04 | 3.4  | 0.49 | 0.96 | 0.3  | 1.01  |
| 102639543 | 'Ifi206'        | 0    | 0    | 0    | 0    | 0    | 0    | 0    | 0    | 0    | 0.23  |
| 102639598 | 'Gm14296'       | 0    | 1.6  | 4.83 | 1.6  | 3.22 | 3.15 | 3.28 | 4.06 | 1.89 | 2.61  |
| 102639650 | 'Vamp9'         | 0    | 0    | 0.41 | 0    | 0.88 | 1.26 | 0.73 | 0.71 | 0    | 0     |
| 102639653 | 'LOC102639653'  | 3.86 | 1.87 | 5.21 | 6.55 | 1.14 | 3.65 | 2.25 | 2.48 | 3.4  | 3.59  |
| 102640043 | 'Gm36210'       | 0    | 0.16 | 0    | 0    | 0.06 | 4.49 | 0    | 0    | 0    | 1.63  |
| 102640263 | 'Gm36375'       | 0    | 0.48 | 0    | 0    | 0    | 0    | 0    | 0    | 0.79 | 0     |
| 102640268 | 'Gm2956'        | 2.03 | 2.19 | 5.69 | 0    | 4.18 | 1.85 | 0.63 | 3.92 | 3.92 | 3.54  |
| 102640292 | '102640292'     | 0.43 | 0.46 | 0.76 | 0.72 | 0.37 | 0.11 | 1.03 | 0.63 | 0.03 | 0.15  |
| 102640376 | 'Gm36448'       | 0    | 0    | 0    | 0    | 0    | 0    | 0    | 0    | 1.74 | 0     |
| 102640399 | '102640399'     | 7.21 | 7.43 | 8.5  | 12.5 | 17.6 | 5.02 | 14.6 | 8.81 | 3.94 | 10.18 |
| 102640444 | 'Gm36504'       | 0    | 0    | 0    | 0    | 0    | 0    | 0    | 0    | 0    | 0.18  |
| 102640476 | 'Gm36527'       | 0.02 | 0.07 | 0.87 | 0.04 | 0.03 | 0.01 | 0.01 | 0.01 | 1.21 | 0.02  |



|           |                 |       |       |      |      |      |       |      |       |       |         |
|-----------|-----------------|-------|-------|------|------|------|-------|------|-------|-------|---------|
| 102640673 | 'LOC102640673'  | 6.31  | 6.23  | 1.19 | 0.04 | 8.99 | 8.39  | 5.53 | 5.14  | 9.91  | 5.63    |
| 102640710 | 'Gm36712'       | 1.14  | 3.65  | 0    | 0    | 0    | 0     | 3.14 | 0     | 0     | 0.04    |
| 102640809 | 'Gm36789'       | 0     | 0     | 0    | 2.2  | 0    | 0     | 0    | 0     | 0     | 0       |
| 102640833 | 'Gm36807'       | 0     | 0     | 0    | 0    | 0    | 0     | 0    | 0     | 0     | 1.38    |
| 102640920 | 'Pvrig'         | 0     | 0     | 0    | 0    | 0    | 0     | 0    | 0     | 2.23  | 0       |
| 102641028 | 'LOC102641028'  | 0     | 0.16  | 1.62 | 1.7  | 1.93 | 0.34  | 0.81 | 0     | 0.46  | 2.05    |
| 102641068 | 'Gm38529'       | 0.75  | 0.77  | 1.51 | 1.46 | 0.77 | 0.3   | 2.89 | 0.66  | 2.01  | 0       |
| 102641467 | 'Gm20684'       | 0.29  | 0     | 0    | 0    | 0    | 0     | 0    | 0     | 0     | 0       |
| 102641557 | 'Gm38564'       | 0     | 0     | 0.03 | 0    | 0    | 0     | 0    | 0     | 0.01  | 0       |
| 102642386 | 'LOC102642386'  | 0     | 0.02  | 0    | 0    | 0    | 0     | 0    | 0     | 0     | 0       |
| 102643088 | 'Gm38656'       | 0     | 0     | 0    | 0    | 0    | 0     | 0    | 0     | 0.23  | 0       |
| 102643210 | 'Gm38664'       | 0.02  | 0     | 0.12 | 0    | 0    | 0     | 0    | 0     | 0     | 0       |
| 102644    | 'Oaf'           | 0     | 0.16  | 0    | 0    | 0    | 0     | 3.72 | 0     | 0     | 0       |
| 102657    | 'Cd276'         | 3.21  | 2.56  | 6.74 | 7.1  | 0.32 | 7.01  | 0    | 0     | 0.6   | 4.21    |
| 102680    | 'Slc6a20a'      | 0     | 0     | 0    | 0    | 0    | 0     | 0.05 | 0     | 0     | 0.11    |
| 102693    | 'Phldb1'        | 8.46  | 1.8   | 4.5  | 6.15 | 5.79 | 5.78  | 5.97 | 0.99  | 0.08  | 1.17    |
| 102747    | 'Lrrc49'        | 52.9  | 44.62 | 56.4 | 47.5 | 39.6 | 42.55 | 45.7 | 43.04 | 40.64 | 42.31   |
| 102774    | 'Bbs4'          | 57.78 | 61.73 | 80.8 | 47   | 70.1 | 61.78 | 62.4 | 72.05 | 69.92 | 94.01   |
| 102791    | 'Tcta'          | 24.06 | 44.14 | 56.5 | 36.4 | 55.9 | 83.1  | 49.7 | 64.73 | 65.05 | 62.56   |
| 102857    | 'Slc6a8'        | 0.13  | 0.81  | 2.51 | 4.66 | 4.65 | 7.29  | 0    | 2.26  | 3.25  | 0       |
| 102866    | 'Pls3'          | 30.29 | 48.65 | 22.4 | 29.1 | 32.8 | 17.07 | 45.9 | 56.34 | 34.99 | 49.05   |
| 102871    | 'D330045A20Rik' | 1.06  | 6.5   | 3.64 | 14.5 | 1.17 | 6.59  | 0    | 1.09  | 34.4  | 31.51   |
| 102902673 | 'Gm21992'       | 2.25  | 0.31  | 2.36 | 1.33 | 0.18 | 0.07  | 0.43 | 8.92  | 0     | 0       |
| 102920    | 'Cenpi'         | 0     | 0     | 0    | 0    | 0    | 0.39  | 0.67 | 0     | 0     | 0       |
| 102954    | 'Nudt10'        | 39.38 | 60.51 | 18.3 | 27.6 | 36.1 | 34.09 | 35.1 | 21.45 | 43.46 | 11.93   |
| 103080    | 'Sept10'        | 2.08  | 1.82  | 0.13 | 0.29 | 0.13 | 0.32  | 0.09 | 0.06  | 2.47  | 0.12    |
| 103098    | 'Slc6a15'       | 26.09 | 28.49 | 21.2 | 25.1 | 19.7 | 2.56  | 10.5 | 18.66 | 7.46  | 20.43   |
| 103135    | 'Pan2'          | 14.09 | 8.09  | 10.7 | 5.76 | 13   | 5.72  | 7.93 | 5.27  | 9.86  | 9.29    |
| 103136    | 'Pwp1'          | 19.77 | 21.52 | 14.9 | 0.02 | 18.7 | 14.92 | 4.19 | 16.49 | 8.04  | 11.44   |
| 103140    | 'Gstt3'         | 3.42  | 1.44  | 5.59 | 7.91 | 0.05 | 0.27  | 0    | 0     | 0.23  | 3.56    |
| 103142    | 'Rdh9'          | 0.71  | 1.27  | 0.62 | 1.51 | 0.42 | 0.59  | 0.07 | 0.18  | 0.32  | 0.44    |
| 103149    | 'Upb1'          | 0     | 0     | 0.25 | 0    | 0    | 0     | 0    | 0     | 2.26  | 1.73    |
| 103172    | 'Chchd10'       | 566.5 | 351.1 | 663  | 414  | 566  | 928.6 | 544  | 543.4 | 580.3 | 380.55  |
| 103199    | 'Fig4'          | 16.08 | 14.81 | 25.3 | 10.4 | 19   | 17.24 | 13.8 | 25.1  | 14.31 | 17.58   |
| 103213    | 'Traf3ip2'      | 10.85 | 0.85  | 2.75 | 0.08 | 2.25 | 4.93  | 0.02 | 1.83  | 0.34  | 2.66    |
| 103220    | 'Ttc41'         | 6.04  | 7.59  | 4.18 | 5.59 | 2.59 | 6.58  | 3.2  | 6.13  | 6.26  | 8.62    |
| 103236    | 'Csnk1g2'       | 4.98  | 10.82 | 4.83 | 6.72 | 4.35 | 9.56  | 3.89 | 4.16  | 4.68  | 4.18    |
| 103266    | 'Tmem263'       | 31.31 | 30.35 | 13.8 | 14   | 19.7 | 8.63  | 16.5 | 16.97 | 6.03  | 17.98   |
| 103268    | 'Cep5711'       | 3.72  | 0.95  | 1.53 | 5.56 | 0    | 10.4  | 0    | 5.06  | 0.84  | 1       |
| 103284    | 'Zc3h10'        | 11.53 | 14.06 | 0.13 | 10.7 | 11.6 | 2.97  | 8.81 | 13.02 | 11.83 | 16.25   |
| 103406    | 'Zfr2'          | 15.94 | 13.77 | 38   | 7.71 | 21.5 | 10.51 | 27.8 | 5.9   | 24.91 | 6.6     |
| 103425    | 'Ncln'          | 17.68 | 16.52 | 17.7 | 17.7 | 22.5 | 10.68 | 15.3 | 14.67 | 9.81  | 8.3     |
| 103466    | 'Nt5dc3'        | 2.18  | 1.76  | 1.78 | 3.39 | 2.64 | 0.75  | 1.29 | 0.74  | 4.15  | 0.16    |
| 103468    | 'Nup107'        | 2.8   | 9.94  | 8.64 | 14.2 | 7.77 | 3.56  | 7.08 | 6.74  | 5.89  | 8.26    |
| 103511    | 'Calhm5'        | 14.02 | 0     | 3.22 | 0    | 0.03 | 7.79  | 8.26 | 6.73  | 9.08  | 3.19    |
| 103534    | 'Mgat4b'        | 1.26  | 2.26  | 3.35 | 1.73 | 1.43 | 0.02  | 4.62 | 0.13  | 3.92  | 0       |
| 103537    | 'Mbt1'          | 1.77  | 3.03  | 1.28 | 3.03 | 1.7  | 0.85  | 3.69 | 2.28  | 5.75  | 1.25    |
| 103554    | 'Psme4'         | 2.09  | 0.35  | 1.14 | 4.17 | 2.04 | 0.18  | 2.2  | 0.72  | 2.22  | 0.34    |
| 103573    | 'Xpo1'          | 7.7   | 7.98  | 9.15 | 10   | 4.05 | 2.27  | 8.87 | 4.95  | 22.3  | 11.41   |
| 103583    | 'Fbxw11'        | 21.53 | 23.4  | 14.3 | 29.3 | 19.6 | 19.87 | 12.7 | 18.6  | 21.11 | 15.32   |
| 103611158 | 'Gm38666'       | 0.16  | 1.9   | 0.57 | 1.27 | 1.08 | 0     | 0    | 0     | 2.06  | 1.61    |
| 103611159 | 'Gm38667'       | 3.78  | 2.94  | 0.57 | 0    | 0    | 7.69  | 0    | 1     | 1.21  | 4.4     |
| 103677    | 'Smg6'          | 8.21  | 5.73  | 5.9  | 5.03 | 5.99 | 3.77  | 4.71 | 6.02  | 4.54  | 6.58    |
| 103694    | 'Tmed4'         | 206.3 | 235.8 | 118  | 103  | 207  | 255.2 | 138  | 202.3 | 232.9 | 312.91  |
| 103710    | 'Slc35e4'       | 20.96 | 19.35 | 32   | 22.5 | 10.2 | 15.84 | 35.9 | 5.3   | 11.48 | 15.79   |
| 103711    | 'Pnpo'          | 30.56 | 65.05 | 73   | 42.4 | 102  | 105.1 | 109  | 76.55 | 73.98 | 109.16  |
| 103712    | '6330403K07Rik' | 2128  | 2232  | 1902 | 2417 | 1864 | 2283  | 1669 | 2821  | 1733  | 1767.71 |
| 103724    | 'Tbc1d10a'      | 14.76 | 11.9  | 2.35 | 32.9 | 12.2 | 4.62  | 33.2 | 16.8  | 23.17 | 10.27   |

|        |                 |       |       |      |      |      |       |      |       |       |         |
|--------|-----------------|-------|-------|------|------|------|-------|------|-------|-------|---------|
| 103733 | 'Tubg1'         | 95.7  | 81.97 | 80.2 | 50.6 | 88.3 | 138.7 | 65.4 | 82.56 | 98.99 | 79.38   |
| 103737 | 'Pex12'         | 13.59 | 8.83  | 8.98 | 16.8 | 9.26 | 5.99  | 14.7 | 3.37  | 8.6   | 17.01   |
| 103742 | 'Mien1'         | 186.6 | 190.8 | 125  | 313  | 207  | 244.5 | 198  | 212   | 189.6 | 199.52  |
| 103743 | 'Tmem98'        | 4.28  | 2.59  | 0    | 0    | 4.67 | 9.65  | 0    | 1.67  | 0     | 2.21    |
| 103765 | 'Tmem17'        | 16.74 | 28.92 | 16.1 | 38.1 | 22   | 21.07 | 28.5 | 10.96 | 34.84 | 34.54   |
| 103768 | 'Tubg2'         | 115.8 | 110.5 | 94.5 | 52.5 | 112  | 186.6 | 166  | 140.1 | 102.6 | 106.61  |
| 103775 | 'Slc25a41'      | 0.91  | 0     | 0    | 0    | 0.08 | 0     | 0    | 0     | 0.31  | 0       |
| 103784 | 'Wdr92'         | 13.97 | 10.2  | 7.41 | 5.75 | 3.49 | 5.78  | 10.8 | 8.09  | 11.02 | 7.5     |
| 103806 | 'Mam11'         | 0.04  | 0.6   | 1.51 | 1.98 | 0.01 | 0     | 1.14 | 0     | 0.54  | 0.02    |
| 103836 | 'Zfp692'        | 8.41  | 17.58 | 30.6 | 13.3 | 34.6 | 30    | 34.7 | 23.81 | 28.67 | 29.61   |
| 103841 | 'Cuedc1'        | 1.01  | 1.61  | 1.63 | 6.92 | 3.86 | 1.76  | 0.43 | 2.35  | 0.83  | 1.13    |
| 103844 | 'Inca1'         | 7.39  | 7.98  | 3.84 | 12.8 | 4.23 | 13.05 | 4.81 | 1.05  | 23.92 | 1.24    |
| 103850 | 'Nt5m'          | 76.17 | 22.63 | 46.1 | 34.7 | 38.2 | 60.65 | 46.8 | 40.21 | 43.18 | 37.66   |
| 103963 | 'Rpn1'          | 97.51 | 104   | 109  | 102  | 77.1 | 90.14 | 72.8 | 88.32 | 130.6 | 119.84  |
| 103967 | 'Dnm3'          | 33.3  | 24.7  | 30.1 | 20.5 | 29.1 | 33.57 | 31   | 19.82 | 33.26 | 16.95   |
| 103978 | 'Gpc5'          | 17.52 | 24.62 | 9.49 | 47.1 | 20.5 | 8.6   | 10.6 | 9.58  | 8.52  | 3.66    |
| 103988 | 'Gck'           | 51.48 | 37.42 | 7    | 51.7 | 41.5 | 25.71 | 15.7 | 41.67 | 9.71  | 30.97   |
| 104001 | 'Rtn1'          | 2015  | 1769  | 1793 | 1658 | 1607 | 2163  | 2174 | 1868  | 1602  | 1622.46 |
| 104009 | 'Qsox1'         | 23.8  | 22.66 | 39   | 20.6 | 29.2 | 15.93 | 27.1 | 23.9  | 28    | 31.3    |
| 104010 | 'Cdh22'         | 4.43  | 7.38  | 22.2 | 0.67 | 0.03 | 1.05  | 3.28 | 4.46  | 0     | 0.62    |
| 104015 | 'Synj1'         | 19.87 | 16.43 | 28.1 | 37.6 | 17.8 | 13.99 | 24.3 | 24.28 | 26.18 | 26.01   |
| 104027 | 'Synpo'         | 1.08  | 0.7   | 0.02 | 1.52 | 4.95 | 0.04  | 6.25 | 1.63  | 3.17  | 3.23    |
| 104069 | 'Sncb'          | 77.32 | 69.28 | 144  | 32.7 | 153  | 89.79 | 156  | 145.4 | 198.1 | 92.42   |
| 104079 | 'Nxph3'         | 0     | 0.07  | 0    | 1.2  | 0    | 0     | 0    | 0.48  | 0     | 0       |
| 104080 | 'Nxph4'         | 5.01  | 0.55  | 0.06 | 0.65 | 25.9 | 102.6 | 0.03 | 0     | 239.2 | 64.88   |
| 104082 | 'Wdr7'          | 8.49  | 7.91  | 23   | 10.2 | 8.48 | 5.38  | 19.3 | 6.94  | 11.71 | 15.11   |
| 104086 | 'Cyp27a1'       | 3.94  | 2.8   | 4.37 | 0    | 2.84 | 2.76  | 0    | 0     | 0     | 0.02    |
| 104099 | 'Itga9'         | 0     | 0     | 1.37 | 0    | 0    | 0     | 0    | 0.68  | 0     | 0       |
| 104111 | 'Adcy3'         | 7.11  | 6.05  | 5.8  | 2.59 | 4.58 | 2.02  | 5.81 | 2.53  | 9.83  | 2.71    |
| 104112 | 'Acly'          | 43.01 | 36.55 | 54.7 | 67   | 38.7 | 6.65  | 56.8 | 42.96 | 60.69 | 84.07   |
| 104130 | 'Ndufb11'       | 260.4 | 234.8 | 212  | 170  | 311  | 437.4 | 244  | 248.1 | 251.7 | 287.2   |
| 104156 | 'Etv5'          | 7.21  | 9.96  | 8.45 | 12.1 | 3.49 | 5.22  | 8.3  | 3.99  | 14.26 | 10.27   |
| 104158 | 'Ces1d'         | 0.04  | 4.9   | 0.02 | 0.06 | 0    | 6.14  | 0    | 0     | 0.02  | 1.69    |
| 104174 | 'Gldc'          | 0     | 0.95  | 1.25 | 3.42 | 0    | 0.02  | 0    | 0     | 0.67  | 0.5     |
| 104175 | 'Sbk1'          | 0.02  | 0     | 0.01 | 0    | 0.08 | 0     | 1.45 | 1.36  | 0     | 0.07    |
| 104184 | 'Blmh'          | 69.42 | 57.74 | 51.3 | 49.5 | 53.8 | 73.95 | 89.3 | 67.11 | 58.49 | 61.98   |
| 104215 | 'Rhoq'          | 1.05  | 2.92  | 0.74 | 0.01 | 1.32 | 0.67  | 0.13 | 0     | 5.81  | 1.51    |
| 104248 | 'Cabin1'        | 9.01  | 5.64  | 7.81 | 7.05 | 8.85 | 3.46  | 21.4 | 11.05 | 7.36  | 11.67   |
| 104252 | 'Cdc42ep2'      | 6.29  | 7.21  | 16.3 | 0    | 11.1 | 7.4   | 0    | 5.15  | 4.2   | 4.2     |
| 104263 | 'Kdm3a'         | 2.18  | 5.56  | 3.28 | 2.87 | 2.44 | 3.2   | 6.67 | 5.58  | 7.88  | 8.92    |
| 104271 | 'Tex15'         | 2.33  | 0     | 0    | 0    | 0    | 0     | 0    | 0     | 0.02  | 0       |
| 104303 | 'Arl1'          | 108.7 | 104.4 | 117  | 90.1 | 123  | 121   | 102  | 145.7 | 156.8 | 113.14  |
| 104318 | 'Csnk1d'        | 19.27 | 31.7  | 26.7 | 43.3 | 12.7 | 21.58 | 29   | 26.39 | 27.01 | 18.25   |
| 104346 | 'Gas8'          | 39.19 | 13.81 | 13.6 | 36.6 | 14.7 | 50.79 | 18.9 | 36.72 | 28.7  | 19.33   |
| 104348 | 'Zfp120'        | 2.72  | 3.57  | 1.01 | 0.01 | 3.75 | 0.06  | 1.99 | 2.08  | 1.21  | 6.07    |
| 104349 | 'Zfp119a'       | 0     | 0.14  | 2.58 | 0.12 | 2.4  | 1.78  | 0    | 1.58  | 4.03  | 1.02    |
| 104362 | 'Meig1'         | 16.07 | 33.09 | 10.6 | 8.61 | 20.1 | 30.77 | 16.2 | 24.82 | 7.02  | 61.82   |
| 104382 | 'Barhl2'        | 0     | 0     | 0    | 0    | 3.37 | 3.66  | 0.15 | 1.19  | 0     | 0.68    |
| 104383 | 'Rcor2'         | 0     | 0.74  | 1.51 | 0.45 | 0    | 1.3   | 0    | 2.75  | 0.13  | 0       |
| 104394 | 'E2f4'          | 2.08  | 5.65  | 6.5  | 11.5 | 4.23 | 0.09  | 3.17 | 2.94  | 1.49  | 0.43    |
| 104401 | 'Pcnx3'         | 1.45  | 0.64  | 1.98 | 1.82 | 1.44 | 2.63  | 1.07 | 1.68  | 0.17  | 0.71    |
| 104416 | 'Bap1'          | 46.18 | 40.45 | 56.6 | 17.4 | 34.2 | 34.16 | 51.9 | 55.01 | 60.65 | 70.51   |
| 104418 | 'Dgkz'          | 2.33  | 1.49  | 7.76 | 13.3 | 9.81 | 1.92  | 8.77 | 1.17  | 10.14 | 2.07    |
| 104443 | 'Npffr2'        | 0     | 0     | 0    | 0    | 0    | 0     | 0    | 2.1   | 0     | 0       |
| 104444 | 'Rexo2'         | 68.56 | 44.16 | 49.9 | 122  | 70.4 | 65.83 | 43   | 44.25 | 86.16 | 30.41   |
| 104445 | 'Cdc42ep1'      | 7.41  | 9.57  | 2.94 | 11.9 | 0.04 | 26.55 | 8.48 | 2.16  | 3.91  | 0       |
| 104457 | '0610010K14Rik' | 54.74 | 84.3  | 52   | 36.3 | 84.2 | 93.57 | 76.8 | 38    | 55.79 | 94.96   |
| 104458 | 'Rars'          | 42.52 | 32.56 | 47.4 | 36.7 | 36.5 | 45.98 | 45.3 | 30.62 | 44.92 | 43.58   |

|           |                |       |       |      |      |      |       |      |       |       |        |
|-----------|----------------|-------|-------|------|------|------|-------|------|-------|-------|--------|
| 104479    | 'Ccdc117'      | 3.88  | 0.45  | 0.89 | 7.12 | 2.05 | 1.11  | 2.14 | 0.02  | 0.06  | 0.95   |
| 104570    | 'Ppp4r3b'      | 7.54  | 11.53 | 8.85 | 7.24 | 6.8  | 9.87  | 6.46 | 10.34 | 7.42  | 11.98  |
| 104582    | 'Rprm1'        | 19.43 | 11.04 | 12.7 | 13   | 66.1 | 74.66 | 19.9 | 23.76 | 0.04  | 0      |
| 104601    | 'Mycbpap'      | 1.87  | 5.08  | 1.16 | 0    | 8.18 | 7.51  | 2.63 | 4.04  | 8.16  | 7.46   |
| 104625    | 'Cnot6'        | 1.65  | 0.73  | 0.39 | 4.38 | 3.06 | 0.2   | 0.02 | 2.81  | 2.4   | 1.99   |
| 104662    | 'Tsr1'         | 5.29  | 11.43 | 5.76 | 6.89 | 12.5 | 16.6  | 6.08 | 4.8   | 7.98  | 7.32   |
| 104681    | 'Slc16a6'      | 0.57  | 1.56  | 1.18 | 0    | 0.51 | 5.38  | 7.35 | 0.25  | 0.4   | 14.46  |
| 104709    | 'Pik3r6'       | 0     | 0     | 0    | 0    | 1.59 | 0     | 0    | 0     | 0     | 0      |
| 104718    | 'Ttc7b'        | 6.19  | 3.3   | 10.6 | 8.81 | 11.4 | 6.52  | 0.78 | 7.06  | 7.88  | 4.51   |
| 104721    | 'Ddx1'         | 92.05 | 60.29 | 104  | 71   | 43.2 | 56.7  | 98.6 | 79.51 | 114.2 | 121.86 |
| 104725    | 'Sptssa'       | 63.02 | 76.72 | 43.3 | 129  | 78.9 | 55.44 | 28.2 | 68.59 | 33.24 | 78.45  |
| 104732    | 'Tedc1'        | 4.91  | 0     | 0.25 | 0    | 0    | 0     | 1.22 | 0     | 0     | 2.43   |
| 104759    | 'Pld4'         | 0     | 0     | 0    | 0    | 0.05 | 13.97 | 12.9 | 0     | 5.17  | 0      |
| 104771    | 'Jkamp'        | 163.9 | 121.1 | 109  | 133  | 149  | 173.4 | 122  | 159.6 | 182.4 | 170.56 |
| 104776    | 'Aldh6a1'      | 32.11 | 22.07 | 22.5 | 17.3 | 21.4 | 17.32 | 39.1 | 18.36 | 24.08 | 16.62  |
| 104799    | 'Vipas39'      | 39.6  | 22.94 | 36.3 | 20.3 | 32.8 | 17.84 | 8.7  | 38.88 | 23.16 | 22.51  |
| 104806    | 'Fancm'        | 0.17  | 1.63  | 1.23 | 0    | 3.72 | 0.01  | 4.05 | 0.14  | 0.96  | 0.91   |
| 104816    | 'Aspg'         | 0     | 0     | 0    | 0    | 0.05 | 0     | 0    | 0     | 0     | 0      |
| 104831    | 'Ptpn23'       | 11.31 | 3.73  | 1.6  | 5.5  | 2.03 | 3.62  | 1.36 | 2.49  | 8.62  | 5.3    |
| 104836    | 'Cbl1'         | 4.02  | 4.2   | 7.36 | 0    | 4.41 | 4.26  | 2.64 | 8.66  | 10.43 | 4.01   |
| 104859    | 'Tecpr2'       | 0.34  | 1.21  | 2.98 | 3.16 | 3.96 | 0.83  | 0    | 0.32  | 0.72  | 0.94   |
| 104871    | 'Spat7'        | 17.49 | 9.73  | 14.9 | 11.6 | 10.2 | 13.17 | 24   | 10.91 | 15.44 | 4.2    |
| 104884    | 'Tdp1'         | 12.32 | 9.06  | 27.3 | 22.9 | 8.57 | 0.04  | 16.7 | 5.96  | 10.76 | 12.15  |
| 104885    | 'Tmem179'      | 265.7 | 288.8 | 291  | 86.2 | 275  | 264   | 316  | 256.4 | 214.6 | 241.38 |
| 104886    | 'Rab15'        | 11.39 | 8.87  | 12.1 | 27.8 | 12.2 | 0     | 20.6 | 8.39  | 17.71 | 6.2    |
| 104910    | 'Slc25a47'     | 0     | 2.12  | 0.74 | 0    | 7.75 | 3.13  | 3.36 | 8.86  | 0     | 0.71   |
| 104923    | 'Adi1'         | 27.28 | 54.6  | 54.7 | 11.9 | 38.3 | 43.01 | 48.4 | 44.52 | 15.75 | 57.94  |
| 105000    | 'Dnal1'        | 3.92  | 1.99  | 3.62 | 0.05 | 6.3  | 5.59  | 1.16 | 0.8   | 4.02  | 1.81   |
| 105005    | 'Fam84a'       | 49.54 | 29.65 | 27.7 | 19.5 | 5.6  | 16.1  | 27.8 | 84.69 | 16.98 | 2.7    |
| 105014    | 'Rdh14'        | 32.29 | 32.49 | 34.2 | 21.9 | 26.6 | 32.03 | 24.2 | 29.17 | 40.67 | 33.32  |
| 105083    | 'Pelo'         | 3.09  | 0.12  | 0.06 | 0    | 2.82 | 5.56  | 1.32 | 1.6   | 4.8   | 3.54   |
| 105148    | 'lars'         | 18.61 | 11.09 | 20.1 | 3.96 | 7.05 | 4.15  | 21   | 19.75 | 14.22 | 14.74  |
| 105171    | 'Arrdc3'       | 3.64  | 6.78  | 6.07 | 0.11 | 4.63 | 5.26  | 5.24 | 2.78  | 1.03  | 6.79   |
| 105180375 | 'Tmem265'      | 2     | 0.36  | 0.81 | 0    | 6.96 | 2.15  | 0    | 1.04  | 0.5   | 4.01   |
| 105193    | 'Nhlrc1'       | 12.44 | 4.82  | 5.54 | 16.2 | 1.63 | 0.02  | 4.94 | 11.5  | 15.09 | 4.07   |
| 105203    | 'Fam208b'      | 3.92  | 3.25  | 4.74 | 7.91 | 3.19 | 2.51  | 2.39 | 2.13  | 1.99  | 1.5    |
| 105239    | 'Rnf44'        | 7.73  | 2.24  | 8.41 | 1.14 | 4.96 | 3.98  | 11.1 | 8.94  | 9.63  | 9.81   |
| 105242399 | 'Gm21083'      | 0     | 0.29  | 0    | 0    | 0.5  | 0.55  | 0.05 | 0.12  | 0     | 0      |
| 105242416 | '105242416'    | 0     | 0.03  | 0.06 | 0    | 0    | 0.12  | 0    | 0     | 0     | 0      |
| 105242418 | 'Gm38690'      | 3.94  | 1.29  | 1.8  | 0    | 4.34 | 0.53  | 0.65 | 2.79  | 7.01  | 4.73   |
| 105242430 | 'Gm38699'      | 1.21  | 0.3   | 0.75 | 3.19 | 0.33 | 0.74  | 0.43 | 1.28  | 1.48  | 0.22   |
| 105242433 | 'Gm38702'      | 0.65  | 0.73  | 1.92 | 0.25 | 0.97 | 0.37  | 1.61 | 0.44  | 1.31  | 0.4    |
| 105242435 | 'Gm38704'      | 0.05  | 0     | 0.47 | 0.14 | 0.08 | 0     | 0.17 | 0.13  | 0.25  | 0.18   |
| 105242449 | 'LOC105242449' | 0     | 0     | 0    | 0    | 0    | 0     | 0.08 | 0     | 0.06  | 0      |
| 105242453 | 'LOC105242453' | 0.08  | 0.41  | 0.13 | 0    | 0    | 0     | 0    | 0     | 0     | 0      |
| 105242736 | 'LOC105242736' | 0.21  | 0.08  | 0.72 | 3.82 | 0    | 0.08  | 0.17 | 0.47  | 0.94  | 0.07   |
| 105242930 | 'Gm39002'      | 0     | 0     | 0.05 | 0    | 0    | 0.17  | 0    | 0     | 0.54  | 0      |
| 105243090 | 'LOC105243090' | 0     | 0     | 0    | 0    | 0    | 0     | 0    | 0     | 0     | 0.53   |
| 105243585 | 'Gm39469'      | 8.4   | 8.26  | 17.8 | 18.5 | 17.6 | 7.15  | 10.2 | 20.68 | 18.68 | 17.34  |
| 105243944 | 'Gm39653'      | 0     | 0     | 0    | 0    | 0    | 0     | 0    | 3.56  | 0     | 0      |
| 105244006 | 'Gm39701'      | 0.25  | 0.27  | 0.3  | 0.87 | 0.36 | 0.71  | 1.72 | 0.43  | 0.38  | 0.92   |
| 105244063 | 'Gm39743'      | 0     | 0     | 0    | 0    | 0    | 0     | 0    | 0.04  | 0     | 0      |
| 105244392 | 'Gm40011'      | 0     | 0     | 0    | 0    | 0    | 0     | 0.02 | 0     | 0     | 0      |
| 105244402 | 'LOC105244402' | 0.41  | 0.42  | 0.04 | 5.2  | 0    | 0     | 0    | 1     | 1.36  | 0.37   |
| 105244808 | 'Gm40353'      | 0     | 0.04  | 0.08 | 0    | 0    | 0     | 0    | 0     | 0     | 0      |
| 105244826 | 'Gm40363'      | 7.91  | 7.84  | 13.6 | 9.98 | 8.91 | 4.58  | 2.39 | 9.46  | 7.15  | 9.15   |
| 105244829 | 'Gm40365'      | 1.42  | 0.55  | 0.49 | 0    | 0    | 0     | 0.4  | 0     | 1.8   | 0.74   |
| 105244832 | 'Gm40368'      | 9.18  | 5.1   | 8.24 | 7.62 | 8.09 | 12.76 | 8.98 | 7.78  | 14.43 | 7.34   |

|           |                 |       |       |      |      |      |       |      |       |       |        |
|-----------|-----------------|-------|-------|------|------|------|-------|------|-------|-------|--------|
| 105244833 | 'Gm40369'       | 0.07  | 0     | 0    | 0    | 0    | 0     | 2.78 | 0.18  | 0     | 0      |
| 105244844 | 'Gm40378'       | 0     | 0     | 0    | 0    | 0    | 0     | 0.08 | 0     | 0.06  | 0      |
| 105244925 | 'Gm40447'       | 0.02  | 0     | 0    | 0    | 0    | 0     | 0    | 0     | 0     | 0      |
| 105244931 | 'Gm40453'       | 0.55  | 0.34  | 0    | 0.13 | 0.55 | 1.09  | 0    | 0     | 0     | 0      |
| 105244938 | 'Gm40460'       | 0     | 0     | 0    | 0    | 0    | 0     | 0    | 0     | 0     | 0.03   |
| 105244980 | 'Gm40498'       | 0     | 0.02  | 0.31 | 0.01 | 0    | 0.76  | 0    | 0.04  | 0     | 0.13   |
| 105244999 | 'Gm40514'       | 0     | 0     | 0.02 | 0    | 0    | 0.03  | 0    | 0     | 0.03  | 0      |
| 105245    | 'Txndc5'        | 20.2  | 19.62 | 16.4 | 46.8 | 6.94 | 8.82  | 39.4 | 22.62 | 50.07 | 8.62   |
| 105245043 | 'LOC105245043'  | 0     | 0     | 0.01 | 0    | 0    | 0     | 0    | 0     | 0     | 0.85   |
| 105245047 | 'Gm40556'       | 0.62  | 0     | 0.15 | 0    | 0    | 0     | 0    | 0     | 2.18  | 0      |
| 105245097 | 'Gm40595'       | 0.03  | 0.56  | 0.82 | 0    | 0.22 | 2.25  | 0.79 | 0.34  | 0.74  | 0.61   |
| 105245106 | 'Gm40600'       | 0     | 0     | 0    | 0    | 0    | 0     | 0.09 | 0     | 0     | 0      |
| 105245236 | 'LOC105245236'  | 0     | 0     | 0    | 0    | 0    | 0     | 0.08 | 0     | 0     | 0.29   |
| 105245342 | 'Gm40814'       | 4.07  | 4.06  | 3.38 | 5.87 | 3.56 | 0     | 3.31 | 0.46  | 0.52  | 3.82   |
| 105245353 | 'Gm40824'       | 0.57  | 0.79  | 1.45 | 2.49 | 0.44 | 0.47  | 0.41 | 0.81  | 0.53  | 0.79   |
| 105245369 | 'Gm40835'       | 0.11  | 0.07  | 0    | 0    | 0.02 | 0     | 1.41 | 0.11  | 0     | 0      |
| 105245381 | 'Gm40847'       | 0.05  | 0.4   | 1.31 | 0.04 | 0.23 | 0.44  | 1.26 | 0.7   | 0.75  | 0.3    |
| 105245383 | 'Gm40848'       | 1.21  | 1.97  | 1.67 | 1.38 | 1.94 | 0.91  | 4.39 | 1.42  | 2.35  | 1.13   |
| 105245389 | 'Gm40853'       | 1.79  | 2.82  | 3.56 | 0.93 | 5.22 | 0     | 4.92 | 2.66  | 9.13  | 1.14   |
| 105245400 | 'Gm40862'       | 0.42  | 0     | 0.08 | 0    | 0.36 | 0.12  | 0.13 | 0.14  | 0.39  | 0.06   |
| 105245402 | 'Gm40864'       | 0.05  | 0.02  | 0.07 | 0    | 0    | 0.05  | 0.39 | 0     | 0.64  | 0      |
| 105245406 | 'LOC105245406'  | 0     | 0.1   | 0    | 0    | 0.12 | 0     | 0    | 0.03  | 0.93  | 0.03   |
| 105245424 | 'Gm40881'       | 0.13  | 0.05  | 0.25 | 0.43 | 0.07 | 0     | 0.21 | 0.11  | 0.06  | 0.04   |
| 105245547 | 'Gm40991'       | 0     | 0     | 0    | 0    | 0    | 0.09  | 0.13 | 0     | 0.04  | 0      |
| 105245580 | 'A930018O16Rik' | 5.06  | 2.05  | 0    | 0    | 0    | 0     | 0    | 0     | 0     | 0      |
| 105245604 | 'Gm41035'       | 0     | 0     | 0    | 0    | 0    | 0.04  | 0    | 0.11  | 0     | 0      |
| 105245668 | 'Gm26650'       | 0     | 0.09  | 0    | 0    | 0    | 0     | 0    | 0.14  | 1.25  | 0      |
| 105245673 | 'LOC105245673'  | 0     | 0     | 0    | 0    | 0    | 0     | 0    | 0.04  | 0     | 0      |
| 105245675 | 'LOC105245675'  | 0     | 0     | 0.23 | 0    | 0    | 0     | 0    | 0     | 0     | 0      |
| 105245682 | 'Gm41099'       | 0     | 0.02  | 0.13 | 0    | 0    | 0.26  | 0.18 | 0     | 0.17  | 0      |
| 105245737 | 'LOC105245737'  | 0     | 0     | 0.5  | 0    | 0.45 | 0     | 0    | 0     | 0     | 0.01   |
| 105245911 | 'Gm41291'       | 2.02  | 0.78  | 3.05 | 3.14 | 4.84 | 0.82  | 4.46 | 5.15  | 0.97  | 3.32   |
| 105246    | 'Brd9'          | 14.44 | 33.64 | 34.8 | 18.8 | 24.5 | 42.98 | 16.3 | 29.9  | 31.87 | 30.96  |
| 105246138 | 'Gm41476'       | 0     | 0     | 0.07 | 0    | 0    | 0.05  | 0    | 0.19  | 0     | 0      |
| 105246320 | 'Gm26637'       | 0     | 0.05  | 0.01 | 0    | 0    | 0     | 0    | 0     | 0     | 1.14   |
| 105246512 | 'Gm41793'       | 0     | 0.2   | 0    | 0    | 0    | 0     | 0    | 0     | 0     | 0      |
| 105246572 | 'Gm41844'       | 2.12  | 1.54  | 2.77 | 1.93 | 2.02 | 1.98  | 2.28 | 0.62  | 0.7   | 2.63   |
| 105246807 | 'Gm42031'       | 0.05  | 0     | 0.82 | 0    | 0    | 0.95  | 0    | 0     | 0.01  | 0.39   |
| 105246811 | '105246811'     | 54.78 | 67.56 | 62.7 | 30.3 | 45   | 53.67 | 46.9 | 40.24 | 60.55 | 83.89  |
| 105246828 | 'Gm42052'       | 1.23  | 0.81  | 1.54 | 1.68 | 0.65 | 2.08  | 0.71 | 0.66  | 4.48  | 1.35   |
| 105246872 | 'Gm42078'       | 0     | 0     | 0    | 0.07 | 0    | 0     | 2.23 | 0     | 0     | 0.7    |
| 105246961 | 'AB010352'      | 0.22  | 2.56  | 0.04 | 0.59 | 1.05 | 0.01  | 2.17 | 0.03  | 0.38  | 2.27   |
| 105246978 | 'Gm42166'       | 0.16  | 0.43  | 0.39 | 1.2  | 0.69 | 0.2   | 0.25 | 0.15  | 0.32  | 0.15   |
| 105247075 | 'LOC105247075'  | 0     | 0     | 0    | 0    | 0    | 0     | 0    | 0     | 1.83  | 0      |
| 105247125 | '105247125'     | 0     | 0     | 0    | 0    | 0    | 0     | 1.54 | 0     | 0     | 0      |
| 105247180 | 'Gm42323'       | 0     | 0.07  | 0    | 0    | 0    | 0     | 0    | 0     | 0     | 0      |
| 105247240 | 'Gm42372'       | 10.72 | 10.62 | 12.8 | 14.1 | 13.4 | 13.38 | 13.7 | 9.93  | 3.77  | 17.61  |
| 105247297 | 'LOC105247297'  | 0     | 0     | 0.06 | 0    | 0    | 0.03  | 0.03 | 0     | 0     | 0      |
| 105278    | 'Cdk20'         | 24.59 | 16.29 | 28.8 | 8.94 | 9.73 | 41.51 | 46.6 | 17.46 | 5.79  | 11.93  |
| 105298    | 'Epd1'          | 204.1 | 200.3 | 165  | 160  | 107  | 153.4 | 126  | 108.7 | 262   | 110.39 |
| 105348    | 'Golm1'         | 2.82  | 1.65  | 0.91 | 0    | 1.46 | 10    | 0    | 0     | 0.14  | 0      |
| 105351    | 'AW209491'      | 34.32 | 45.07 | 45.8 | 40.6 | 43.8 | 47.05 | 40.9 | 63.9  | 73.51 | 72.53  |
| 105352    | 'Dusp22'        | 21    | 20.98 | 18.5 | 6.9  | 17.5 | 6.95  | 10.5 | 14.28 | 10.07 | 12.2   |
| 105372    | 'Utp15'         | 8.99  | 8.89  | 15.1 | 19.3 | 7.38 | 3.69  | 8.84 | 8.87  | 4.21  | 13.6   |
| 105377    | 'Sif1'          | 3.17  | 1.64  | 1.14 | 5.96 | 3.13 | 4.3   | 4.02 | 5.35  | 3.12  | 8.23   |
| 105418    | 'E330034G19Rik' | 0.03  | 0     | 0.1  | 0    | 0    | 0     | 0    | 0     | 0     | 0      |
| 105428    | 'Fam149b'       | 9.01  | 5.03  | 0.08 | 6.38 | 2.08 | 9.83  | 0    | 1.62  | 3.44  | 2.74   |
| 105439    | 'Slain1'        | 1.82  | 2.69  | 0.37 | 5.85 | 2.07 | 0     | 0    | 0.1   | 3.07  | 2.96   |

|           |            |       |       |      |      |      |       |      |       |       |        |
|-----------|------------|-------|-------|------|------|------|-------|------|-------|-------|--------|
| 105440    | 'Kctd9'    | 0.44  | 2.83  | 0.96 | 2.26 | 4.09 | 0.03  | 0.03 | 2.59  | 0     | 5.58   |
| 105445    | 'Dock9'    | 3.62  | 1.94  | 4.31 | 6.28 | 1.07 | 1.89  | 4.56 | 5.77  | 2.48  | 0.46   |
| 105446    | 'Gmpr2'    | 39.34 | 26.15 | 25.1 | 24.9 | 30   | 46.51 | 23.2 | 30.03 | 34.18 | 34.68  |
| 105450    | 'Mmrrn2'   | 0.47  | 0.05  | 0    | 0.95 | 0    | 0     | 0    | 0.57  | 0.15  | 0      |
| 105501    | 'Abhd4'    | 19.98 | 13.62 | 25.6 | 9.84 | 5.55 | 59.4  | 7.28 | 12.9  | 23.02 | 12.85  |
| 105504    | 'Exoc5'    | 11.06 | 6.68  | 14.4 | 13.8 | 5.87 | 4.89  | 3.82 | 9.58  | 10.83 | 0.37   |
| 105513    | 'Chmp7'    | 29.28 | 19.98 | 19.8 | 29.5 | 15.2 | 4.32  | 36.8 | 12.6  | 16.58 | 4.73   |
| 105522    | 'Ankrd28'  | 0     | 1.19  | 1.71 | 0    | 2.74 | 0.03  | 0.69 | 0.34  | 2.83  | 0.56   |
| 105559    | 'Mbnl2'    | 72.24 | 61.09 | 38   | 40.2 | 54.6 | 48.2  | 73.3 | 65.52 | 59.64 | 100.71 |
| 105590    | 'Zfp957'   | 0     | 0     | 0.02 | 0    | 0    | 0     | 0    | 0     | 0     | 0      |
| 105638    | 'Dph3'     | 19.02 | 15.31 | 18.6 | 17.2 | 20.2 | 10.99 | 31.3 | 8.47  | 19.1  | 19.65  |
| 105651    | 'Ppp1r3e'  | 0     | 0     | 0    | 0    | 0.03 | 1.09  | 1.85 | 0     | 0.09  | 0      |
| 105653    | 'Phyhip'   | 119.3 | 135.4 | 143  | 42.9 | 103  | 85.57 | 151  | 114.6 | 55.83 | 94.04  |
| 105663    | 'Thtpa'    | 10.56 | 8.95  | 22.3 | 14   | 20.1 | 17.84 | 15.8 | 18.21 | 13.06 | 14.85  |
| 105670    | 'Rcbtb2'   | 7.9   | 6.14  | 9.31 | 16.3 | 3.18 | 5.58  | 4.34 | 6.2   | 7.06  | 8.83   |
| 105675    | 'Ppif'     | 14.48 | 16.3  | 40.5 | 19   | 27.6 | 35.79 | 23.1 | 17.16 | 42.86 | 9.86   |
| 105689    | 'Mycbp2'   | 6.72  | 12.71 | 11.8 | 20.8 | 11.9 | 9.07  | 18.5 | 8.24  | 8.58  | 10.47  |
| 105704528 | 'Gm13090'  | 0.02  | 0.58  | 0    | 0    | 0    | 0     | 0    | 0     | 0     | 0      |
| 105722    | 'Ano6'     | 4.99  | 5.82  | 6.39 | 2.74 | 8.19 | 1.24  | 0    | 4.28  | 4.02  | 8.84   |
| 105727    | 'Slc38a1'  | 30.42 | 36.18 | 42.8 | 22.6 | 36.1 | 25.82 | 37.5 | 29.96 | 55.28 | 35.19  |
| 105732    | 'Fam83h'   | 0     | 0     | 0    | 0    | 1.04 | 0     | 0    | 0     | 0     | 0      |
| 105734    | 'Tigd5'    | 0.02  | 0.02  | 0    | 2.28 | 0    | 0.07  | 0.04 | 0.05  | 0     | 0.66   |
| 105734727 | 'Gm27021'  | 3.14  | 0     | 6    | 0    | 0    | 4.07  | 0    | 5.29  | 11.88 | 2.15   |
| 105734734 | 'Gm11715'  | 0     | 0     | 0    | 0    | 0    | 1.65  | 0    | 0     | 0.31  | 0      |
| 105782    | 'Scrib'    | 2.64  | 3.5   | 0.93 | 5.22 | 1.95 | 0.1   | 0    | 3.19  | 8.42  | 1.24   |
| 105785    | 'Kdelr3'   | 0     | 0     | 0    | 0    | 0    | 1.12  | 0    | 0     | 0     | 0      |
| 105787    | 'Prkaa1'   | 6.53  | 7.67  | 12.2 | 5.53 | 16.4 | 2.96  | 7.94 | 2.45  | 4.83  | 4.62   |
| 105827    | 'Amigo2'   | 12.1  | 7.23  | 13.8 | 5.7  | 1.31 | 3.58  | 3.6  | 12.37 | 16.67 | 1.09   |
| 105833    | 'Ccadc65'  | 11.34 | 14.18 | 10.3 | 1.19 | 17.1 | 26.82 | 0    | 6.38  | 8.66  | 16.73  |
| 105835    | 'Sgsm3'    | 36.11 | 33.24 | 29.4 | 53.8 | 42.8 | 35.33 | 39.2 | 47.46 | 31.28 | 46.21  |
| 105837    | 'Mtbp'     | 0     | 0     | 0    | 4.87 | 0    | 0     | 0    | 0     | 0.44  | 0      |
| 105841    | 'Dennd3'   | 1.44  | 0     | 0.77 | 0.05 | 0.58 | 2.65  | 0    | 0.03  | 0.02  | 1.41   |
| 105844    | 'Card10'   | 0     | 0.13  | 1.66 | 0    | 0    | 0     | 0    | 0.01  | 0.61  | 0      |
| 105847    | 'Lmf2'     | 13.06 | 1.72  | 4.76 | 17.4 | 12.2 | 2.21  | 9.22 | 2.62  | 9.45  | 9.51   |
| 105853    | 'Mal2'     | 17.74 | 7.77  | 12   | 0.71 | 12.7 | 19.06 | 23.5 | 15.74 | 15.45 | 3.29   |
| 105855    | 'Nckap1l'  | 0     | 0     | 0    | 0    | 1.33 | 0     | 0    | 0     | 0     | 0      |
| 105859    | 'Csdc2'    | 97.95 | 107.7 | 138  | 36.3 | 111  | 107.6 | 115  | 101.7 | 152.6 | 83.35  |
| 105886298 | 'Cmc4'     | 19.54 | 13.84 | 1.2  | 3.75 | 14.6 | 8.02  | 25.2 | 13.21 | 15.88 | 13.57  |
| 105940408 | 'Gm20498'  | 46.88 | 46.77 | 49.9 | 49.7 | 34.7 | 60.39 | 32.6 | 41.44 | 41.92 | 22.68  |
| 105943584 | 'Gm45927'  | 0.82  | 0.07  | 0    | 0    | 0.97 | 1.09  | 0    | 0.39  | 0.77  | 0      |
| 105980076 | 'Gm45929'  | 0     | 0.01  | 0    | 0    | 0    | 0     | 0    | 0     | 0     | 0      |
| 105988    | 'Esp1l'    | 0     | 0.09  | 0    | 0    | 0    | 0     | 0    | 0     | 1.94  | 0.03   |
| 106014    | 'Fam19a5'  | 21.6  | 21.06 | 15.5 | 26.2 | 23.1 | 7.03  | 3.64 | 12.62 | 8.48  | 10.59  |
| 106021    | 'Topors'   | 18.18 | 17.04 | 9.37 | 9.1  | 4.5  | 7.06  | 20.7 | 14.35 | 14.87 | 19.12  |
| 106025    | 'Sharpin'  | 22.04 | 24.08 | 34   | 25.1 | 53.8 | 31.06 | 39.2 | 61.17 | 30.37 | 39.68  |
| 106039    | 'Gga1'     | 13.51 | 14.18 | 16.7 | 11.2 | 12.4 | 15.66 | 31.2 | 15.91 | 24.68 | 18.84  |
| 106042    | 'Prickle1' | 4.37  | 3.7   | 1.19 | 0    | 3.86 | 0.98  | 2.39 | 2.37  | 5.53  | 2.91   |
| 106052    | 'Fbxo4'    | 3.2   | 0.51  | 2.89 | 0.7  | 2.37 | 0     | 0.03 | 0.14  | 0.05  | 1.44   |
| 106064    | 'AW549877' | 2.5   | 3.54  | 8    | 4.11 | 4.43 | 4.01  | 7.62 | 3.1   | 20.83 | 8.14   |
| 106068    | 'Slc45a4'  | 1.38  | 3.38  | 1.73 | 2.82 | 4.53 | 3.5   | 0.13 | 3.75  | 0.39  | 2.5    |
| 106073    | 'Mfsd5'    | 11.18 | 8.74  | 11.7 | 3.13 | 17.7 | 17.48 | 18.2 | 20.09 | 16.49 | 12.79  |
| 106143    | 'Cggbp1'   | 12.25 | 5.4   | 10   | 12.4 | 5.37 | 2.96  | 5.25 | 4.23  | 9.59  | 8.04   |
| 106200    | 'Txndc11'  | 0.85  | 5.96  | 3.86 | 4.22 | 9.37 | 6.14  | 8.51 | 3.16  | 12.04 | 10.73  |
| 106205    | 'Zc3h7a'   | 7.77  | 10.89 | 10.4 | 4.06 | 18.2 | 9.44  | 2.18 | 8.53  | 12.56 | 17.52  |
| 106248    | 'Qtrt2'    | 6.55  | 2.85  | 4.33 | 3.45 | 6.44 | 6.1   | 4.4  | 3.11  | 3.84  | 4.21   |
| 106298    | 'Rrn3'     | 35.33 | 54.74 | 44.4 | 22.2 | 30.3 | 9.7   | 30.2 | 40.03 | 50.82 | 44.21  |
| 106326    | 'Osbp111'  | 4.35  | 0.89  | 1.92 | 0.3  | 2.46 | 0.36  | 0.13 | 0.61  | 1.43  | 0.62   |
| 106338    | 'Nsun3'    | 3.51  | 4.7   | 3.07 | 0    | 10.6 | 3.79  | 0.2  | 4.04  | 10.86 | 11.92  |

|        |            |       |       |      |      |      |       |      |       |       |         |
|--------|------------|-------|-------|------|------|------|-------|------|-------|-------|---------|
| 106344 | 'Rfc4'     | 7.59  | 2.15  | 4.86 | 1.87 | 10.6 | 0.04  | 0    | 4.29  | 0.11  | 13.22   |
| 106347 | 'Ildr1'    | 0     | 0.57  | 0    | 0    | 0    | 0     | 0    | 0     | 0     | 0       |
| 106369 | 'Ypel1'    | 1.58  | 4.41  | 3.52 | 0    | 2.77 | 5.53  | 11.1 | 6.77  | 0     | 0       |
| 106389 | 'Eaf2'     | 1.46  | 2.23  | 3.45 | 3.17 | 2.9  | 1.48  | 1.69 | 1.35  | 10.47 | 2.7     |
| 106393 | 'Srl'      | 0.04  | 0.01  | 0.06 | 0.02 | 0    | 0.01  | 0.05 | 0.34  | 0.02  | 0.05    |
| 106407 | 'Slc51a'   | 0     | 0     | 0.13 | 0    | 0    | 0     | 0    | 0     | 0     | 0.45    |
| 106489 | 'Sft2d1'   | 95.57 | 53.93 | 44.7 | 102  | 87.8 | 103.4 | 61.7 | 104.7 | 62.5  | 115.77  |
| 106504 | 'Stk38'    | 18.82 | 5.16  | 13.2 | 0.67 | 5.53 | 6.27  | 11.3 | 11.82 | 13.05 | 9.67    |
| 106512 | 'Gpsm3'    | 0     | 1.86  | 0    | 1.38 | 0    | 1.42  | 0    | 2.95  | 2.09  | 2.17    |
| 106522 | 'Pkdcc'    | 2.63  | 2.61  | 0    | 3.17 | 1.5  | 0     | 0.04 | 1.81  | 1.83  | 0.04    |
| 106529 | 'Tecr'     | 1897  | 1472  | 1477 | 1512 | 1525 | 1800  | 1502 | 2109  | 1800  | 1843.64 |
| 106564 | 'Ppcs'     | 31.7  | 10.74 | 22.3 | 44.8 | 22.8 | 18.31 | 36.4 | 35.68 | 18.69 | 29.73   |
| 106565 | 'Dlk2'     | 10.32 | 13.13 | 8.66 | 17.1 | 8.93 | 12.21 | 21.5 | 9.7   | 8.73  | 5.07    |
| 106572 | 'Rab31'    | 7     | 10.73 | 15.4 | 6.23 | 6.69 | 14.51 | 19.2 | 12.17 | 2.8   | 1.6     |
| 106581 | 'Fam234a'  | 5.32  | 7.54  | 12.4 | 13.6 | 14.5 | 12.82 | 12.4 | 1.04  | 2.32  | 2.57    |
| 106582 | 'Nrm'      | 0     | 0.03  | 0.03 | 0    | 3.95 | 0     | 8.91 | 2.25  | 0     | 0       |
| 106583 | 'Scaf8'    | 3.39  | 1.35  | 4.44 | 6.67 | 0.58 | 2.19  | 8.34 | 0.94  | 2.93  | 3.21    |
| 106585 | 'Ankrd12'  | 11.41 | 7.01  | 9.66 | 12.8 | 15.5 | 14.16 | 11.1 | 9.14  | 7.21  | 8.67    |
| 106618 | 'Wdr90'    | 2.41  | 1.13  | 0.19 | 1.74 | 0    | 0     | 2.67 | 0.15  | 4.56  | 2.53    |
| 106628 | 'Trip10'   | 0.25  | 0     | 0.02 | 0.02 | 0.37 | 0.02  | 2.27 | 8.06  | 8.26  | 0       |
| 106633 | 'Ift140'   | 3.16  | 2.38  | 1.56 | 0.12 | 2.36 | 0.78  | 3.01 | 6.92  | 1.79  | 7.16    |
| 106639 | 'Vmac'     | 6.26  | 10.28 | 6.71 | 0    | 31   | 17.11 | 5.1  | 14.83 | 10.93 | 10.65   |
| 106648 | 'Cyp4f15'  | 3.03  | 1.21  | 3.7  | 2.8  | 0.02 | 0.02  | 6.13 | 0.03  | 2.28  | 1.23    |
| 106672 | 'Al413582' | 242.4 | 111.8 | 157  | 193  | 153  | 211.2 | 233  | 207.3 | 162.8 | 207.86  |
| 106707 | 'Rpusd1'   | 70.96 | 69.21 | 67.5 | 45.1 | 92.1 | 60.5  | 54.6 | 53.82 | 47.36 | 56.19   |
| 106757 | 'Catsperd' | 0     | 0     | 0    | 0    | 0    | 2.61  | 5.09 | 1.64  | 0.1   | 0.37    |
| 106759 | 'Ticam1'   | 0     | 0     | 0.2  | 0    | 0    | 0     | 0    | 0     | 4.38  | 2.45    |
| 106763 | 'Ttbk1'    | 0.43  | 0.26  | 0.53 | 0.04 | 5.08 | 0.15  | 1.17 | 0.38  | 0.44  | 0.12    |
| 106766 | 'Stap2'    | 0.12  | 2     | 0    | 0    | 5.09 | 0.08  | 0    | 0.84  | 0     | 0       |
| 106794 | 'Dhx57'    | 6.99  | 9.69  | 5.14 | 16.7 | 12.3 | 8.23  | 10.5 | 10.14 | 12.64 | 14.38   |
| 106795 | 'Tcf19'    | 0     | 0     | 2.52 | 0    | 0    | 0     | 0    | 2.04  | 4.02  | 0       |
| 106821 | 'Oard1'    | 18.26 | 26.92 | 31.6 | 55.3 | 30.9 | 19.01 | 33.6 | 18.15 | 52.5  | 18.12   |
| 106840 | 'Unc119b'  | 7.43  | 7.05  | 9.78 | 0.02 | 1.73 | 0     | 7.59 | 1.88  | 2.92  | 0       |
| 106861 | 'Abhd3'    | 64.09 | 28.8  | 31.7 | 59.3 | 16   | 59.4  | 14.8 | 45    | 48.37 | 30.89   |
| 106869 | 'Tnfaip8'  | 4.5   | 0     | 0.07 | 0    | 0    | 0.05  | 4.32 | 0.02  | 0     | 0.86    |
| 106877 | 'Afap111'  | 1.25  | 2.02  | 1.41 | 0    | 5.39 | 0     | 1.63 | 0.73  | 2.35  | 2.71    |
| 106878 | 'Smim3'    | 0     | 0.43  | 4.01 | 6.9  | 3.83 | 0     | 4.85 | 6.11  | 12.38 | 0       |
| 106894 | 'Hmgxb3'   | 5.38  | 1.25  | 6.87 | 6.71 | 5.55 | 0.15  | 6.41 | 0.33  | 5.73  | 2.9     |
| 106931 | 'Kctd1'    | 1.08  | 0.22  | 1.99 | 0    | 0.95 | 11    | 6.25 | 0.66  | 1.07  | 0.07    |
| 106947 | 'Slc39a3'  | 1.21  | 2.99  | 8.67 | 8.36 | 0.72 | 9.58  | 6.17 | 7.02  | 2.89  | 6.96    |
| 106952 | 'Arap3'    | 0     | 0.49  | 0.28 | 0    | 0    | 0     | 0    | 0     | 0.04  | 0       |
| 106957 | 'Slc39a6'  | 35.96 | 37.43 | 49.4 | 44.8 | 24.7 | 30.42 | 40.8 | 45.95 | 51.36 | 30.49   |
| 107022 | 'Gramd3'   | 4.3   | 0     | 0.08 | 0.26 | 6.09 | 0     | 5.14 | 3.32  | 3.07  | 0       |
| 107029 | 'Me2'      | 24.75 | 20.11 | 6.48 | 23   | 16   | 8.74  | 6.72 | 22.6  | 14.86 | 16.96   |
| 107035 | 'Fbxo38'   | 11.48 | 10.97 | 12.9 | 21.8 | 4.86 | 4.46  | 13.8 | 18.04 | 21.86 | 12.26   |
| 107045 | 'Lars'     | 13.33 | 10.59 | 17   | 5.5  | 9.8  | 5.71  | 15.7 | 10.9  | 8.02  | 11.79   |
| 107047 | 'Psmg2'    | 31.97 | 45.58 | 27.8 | 17.5 | 26.3 | 52.35 | 42.3 | 31.86 | 30.09 | 56.25   |
| 107065 | 'Lrrtm2'   | 11.14 | 9.89  | 10.6 | 13.1 | 5.93 | 2.86  | 8.73 | 4.81  | 2.56  | 7.41    |
| 107071 | 'Wdr74'    | 28.78 | 49.63 | 51.3 | 31.3 | 58   | 54.48 | 20.1 | 52.78 | 41.88 | 39.09   |
| 107094 | 'Rrp12'    | 6.94  | 17.64 | 13.9 | 16.7 | 2.08 | 2.88  | 6.69 | 3.15  | 16.59 | 6.46    |
| 107173 | 'Gpr137'   | 51.76 | 38.48 | 68.3 | 4.39 | 54.2 | 33.02 | 79.5 | 57.82 | 31.06 | 46.81   |
| 107182 | 'Btaf1'    | 1.15  | 0.46  | 0.79 | 2.71 | 1.23 | 1.68  | 0.33 | 0.14  | 2.05  | 0.85    |
| 107197 | 'Uqcc3'    | 20.83 | 46.61 | 57.4 | 61   | 84.9 | 62.59 | 35.1 | 63.87 | 35.92 | 43.55   |
| 107221 | 'Ffar4'    | 0     | 0     | 0    | 0    | 0.11 | 0     | 0    | 0     | 0     | 0       |
| 107227 | 'Macrod1'  | 0.01  | 4.35  | 1.37 | 5.96 | 2.79 | 0.11  | 0.2  | 1.6   | 4.06  | 0.17    |
| 107239 | 'Carns1'   | 1.71  | 6.57  | 5.23 | 0.09 | 11.9 | 7.27  | 0    | 2.73  | 1.92  | 0.19    |
| 107242 | 'Al837181' | 5.12  | 18.43 | 2.94 | 5.16 | 26.1 | 29.45 | 15.7 | 13.93 | 4.31  | 9.46    |
| 107250 | 'Kazald1'  | 0     | 0     | 14.3 | 3.84 | 3.51 | 0.03  | 5.95 | 6.05  | 0     | 0       |

|           |            |       |       |      |      |      |       |      |       |       |        |
|-----------|------------|-------|-------|------|------|------|-------|------|-------|-------|--------|
| 107260    | 'Otub1'    | 360.6 | 352.3 | 404  | 418  | 491  | 446.2 | 451  | 570.6 | 432   | 371.96 |
| 107271    | 'Yars'     | 87.11 | 72.19 | 70.9 | 92.3 | 45   | 86.42 | 93.7 | 77.4  | 47.4  | 70.28  |
| 107272    | 'Psat1'    | 20.42 | 20.75 | 35.2 | 10.3 | 18.1 | 24.11 | 15.8 | 14.62 | 14.71 | 17.2   |
| 107303348 | 'Gm45935'  | 0     | 0     | 0    | 0    | 0    | 0     | 0    | 0     | 0     | 0.04   |
| 107305    | 'Vps37c'   | 9.38  | 11.3  | 4.38 | 0.02 | 19.9 | 18.66 | 16.2 | 16.22 | 37.12 | 14.47  |
| 107321    | 'Lpxn'     | 0     | 0     | 0    | 0    | 0    | 12.78 | 4.83 | 0     | 0     | 0      |
| 107328    | 'Trpt1'    | 16.94 | 15.9  | 2.89 | 13.4 | 20.8 | 20.28 | 13.5 | 13.7  | 7.15  | 6.29   |
| 107338    | 'Gbf1'     | 8.39  | 11.21 | 10.9 | 12.2 | 6.42 | 8.17  | 13.2 | 12.87 | 18.27 | 12.93  |
| 107351    | 'Kank1'    | 0.2   | 3.54  | 3.29 | 0.7  | 0.14 | 3.28  | 16.3 | 4.41  | 0.05  | 0      |
| 107358    | 'Tm9sf3'   | 5.41  | 4.18  | 3.75 | 3.55 | 7.46 | 1.02  | 6.78 | 3.02  | 1.66  | 4.62   |
| 107368    | 'Pdzd8'    | 1.12  | 3.22  | 2.49 | 3.64 | 6.52 | 1.13  | 5.43 | 0.67  | 2.15  | 1.49   |
| 107371    | 'Exoc6'    | 6.28  | 2.47  | 6.6  | 5.71 | 1.83 | 0.38  | 4.93 | 4.55  | 9.75  | 5.7    |
| 107373    | 'Fam111a'  | 0     | 0     | 0.11 | 0    | 0    | 0.45  | 0    | 0     | 1.88  | 0      |
| 107375    | 'Slc25a45' | 0     | 0     | 0    | 0.56 | 4.43 | 0     | 0    | 1.36  | 0     | 0      |
| 107392    | 'Brms1'    | 38.97 | 24.82 | 14.2 | 16.8 | 20.7 | 28.63 | 0.8  | 20.22 | 20.74 | 25.08  |
| 107435    | 'Hat1'     | 26.04 | 20.39 | 15.6 | 5.52 | 14.5 | 30.96 | 40.3 | 15.79 | 51.35 | 35.5   |
| 107448    | 'Unc5a'    | 6.64  | 5.89  | 4.98 | 1.45 | 7    | 18.63 | 11.6 | 10.14 | 5.88  | 6.92   |
| 107449    | 'Unc5b'    | 0.85  | 0.13  | 0    | 0    | 4.55 | 2.84  | 0.01 | 0     | 0.59  | 2.46   |
| 107476    | 'Acaca'    | 2.04  | 0.89  | 4.76 | 6.66 | 2.32 | 1.33  | 2.53 | 2.87  | 1.5   | 3.25   |
| 107477    | 'Guca1b'   | 0.4   | 0     | 0.03 | 0    | 0    | 0     | 0    | 0.12  | 0     | 3.35   |
| 107503    | 'Atf5'     | 0.03  | 0.86  | 0    | 5.55 | 5.6  | 0.61  | 0    | 0.23  | 6.4   | 0.07   |
| 107508    | 'Eprs'     | 22.57 | 21.25 | 40.3 | 47   | 22.2 | 37.34 | 31.7 | 24.73 | 33.72 | 46.1   |
| 107513    | 'Ssr1'     | 80.24 | 116.6 | 67.6 | 117  | 63.3 | 92.63 | 52.5 | 78.57 | 108.2 | 148.14 |
| 107515    | 'Lgr4'     | 2.23  | 6.08  | 2.53 | 3.33 | 2.63 | 1.48  | 1.16 | 3.08  | 4.29  | 3.21   |
| 107522    | 'Ece2'     | 33.97 | 28.57 | 39.7 | 18.6 | 40.6 | 24.55 | 28.8 | 39.48 | 36.86 | 51.88  |
| 107527    | 'Il1rl2'   | 0     | 0     | 0    | 0    | 0    | 2.04  | 0    | 0     | 0     | 0      |
| 107528    | 'Magee1'   | 137.8 | 121.9 | 146  | 42.8 | 99.3 | 76.11 | 129  | 110.8 | 131.8 | 153.28 |
| 107566    | 'Arl2bp'   | 9.17  | 17.2  | 23   | 15.6 | 13   | 3.34  | 7.48 | 11.64 | 14.2  | 8.29   |
| 107568    | 'Wwp1'     | 0.76  | 1.24  | 2    | 1.84 | 2.36 | 0.3   | 1.21 | 0.24  | 1.13  | 0.83   |
| 107569    | 'Nt5c3'    | 45.46 | 80.25 | 62   | 8.92 | 45.5 | 36.66 | 57.5 | 55.01 | 40.67 | 45.47  |
| 107581    | 'Col16a1'  | 0.87  | 2.97  | 8    | 4.29 | 5.77 | 1.94  | 12.9 | 4.05  | 0     | 0      |
| 107589    | 'Mylk'     | 0.04  | 0.16  | 0.42 | 0    | 0.31 | 0     | 0.2  | 0.32  | 0.02  | 0      |
| 107605    | 'Rdh1'     | 0.51  | 0.75  | 1.06 | 1.15 | 1.27 | 0.67  | 0.93 | 0.51  | 1.3   | 0.55   |
| 107607    | 'Nod1'     | 0     | 0     | 0.09 | 0    | 0.87 | 0     | 0    | 0.79  | 0     | 0      |
| 107650    | 'Pi4kb'    | 6.34  | 6.52  | 5.13 | 0    | 8.17 | 0.95  | 2.79 | 6.96  | 4.62  | 2.57   |
| 107652    | 'Uap1'     | 8.14  | 11.67 | 3.57 | 1.3  | 7.83 | 3.72  | 3.98 | 6.95  | 5.07  | 4.24   |
| 107684    | 'Coro2a'   | 1.05  | 0.74  | 3.35 | 2.64 | 7.96 | 1.51  | 2.09 | 3.36  | 2.6   | 0.04   |
| 107686    | 'Snrpd2'   | 202.8 | 214.6 | 216  | 356  | 201  | 336.5 | 138  | 168.6 | 311.7 | 227.29 |
| 107701    | 'Sf3b4'    | 90.14 | 69.41 | 98.7 | 43   | 64.1 | 79.8  | 71.7 | 113.2 | 98.52 | 93.99  |
| 107702    | 'Rnh1'     | 92.18 | 70.92 | 53.2 | 47.8 | 40.6 | 75.94 | 77.7 | 69.03 | 96.23 | 87.73  |
| 107723    | 'Slc12a6'  | 4.83  | 3.57  | 4.66 | 3.55 | 2.39 | 1.58  | 4.46 | 3.92  | 4.05  | 1.08   |
| 107732    | 'Mrpl10'   | 55.06 | 72.67 | 74.9 | 41   | 69.9 | 101.2 | 131  | 79.3  | 48.37 | 60.85  |
| 107733    | 'Mrpl41'   | 82.02 | 64.33 | 57.3 | 56.2 | 49.3 | 108.2 | 72   | 83.58 | 48.16 | 77.4   |
| 107734    | 'Mrpl30'   | 123.4 | 149   | 109  | 224  | 95.2 | 149.1 | 133  | 139.8 | 150.3 | 132.51 |
| 107746    | 'Rapgef1'  | 0.02  | 1.42  | 2.9  | 9.97 | 4.79 | 0.04  | 2.99 | 2.34  | 1.91  | 3.47   |
| 107747    | 'Aldh1l1'  | 17.32 | 2.84  | 4.4  | 0.02 | 2.1  | 6.16  | 9.93 | 2.73  | 8.7   | 0.15   |
| 107751    | 'Prrxl1'   | 0     | 0     | 2.09 | 0    | 0    | 0     | 0    | 0     | 0     | 0      |
| 107765    | 'Ankrd1'   | 0.28  | 0.05  | 1.21 | 0.23 | 0.22 | 0.34  | 0.54 | 0.09  | 0.29  | 0.29   |
| 107766    | 'Haao'     | 0     | 0.36  | 0    | 0    | 0    | 0.02  | 0    | 0     | 0     | 0      |
| 107767    | 'Scamp1'   | 89.48 | 76.2  | 77   | 54.7 | 77.6 | 28.17 | 94.1 | 86.31 | 92.14 | 76.79  |
| 107769    | 'Tm6sf1'   | 1.76  | 0.53  | 1.9  | 0.29 | 0.28 | 9.45  | 0.04 | 4.77  | 0.64  | 3.32   |
| 107770    | 'Tm6sf2'   | 0.03  | 0.67  | 0    | 1.28 | 2    | 0     | 0    | 0     | 0     | 0      |
| 107771    | 'Bmyc'     | 185.3 | 161.1 | 174  | 92.1 | 184  | 272.2 | 206  | 162.4 | 171.6 | 206.32 |
| 107815    | 'Scml2'    | 0     | 0.1   | 0    | 2.19 | 0    | 0     | 0    | 0     | 0     | 0      |
| 107817    | 'Jmjd6'    | 11.84 | 15.25 | 15.4 | 33.7 | 26.3 | 23.74 | 10.6 | 11.97 | 25.31 | 21.35  |
| 107823    | 'Nsd2'     | 5.54  | 3.32  | 2.49 | 4.63 | 5.05 | 3.99  | 7.22 | 0.83  | 5.62  | 4.58   |
| 107829    | 'Thoc5'    | 6.32  | 16.36 | 21.4 | 0.84 | 15.6 | 22.58 | 15.4 | 21.48 | 13.56 | 5.89   |
| 107831    | 'Adgrb1'   | 2.87  | 2.29  | 1.32 | 2.67 | 3.25 | 2.85  | 1.37 | 1.6   | 3.15  | 1.54   |

|        |            |       |       |      |      |      |       |      |       |       |        |
|--------|------------|-------|-------|------|------|------|-------|------|-------|-------|--------|
| 107869 | 'Cth'      | 3.44  | 6.77  | 0    | 0    | 3.82 | 10.08 | 0.07 | 0     | 3.23  | 0      |
| 107885 | 'Mthfs'    | 3.42  | 5.09  | 7.38 | 24   | 12.4 | 13.11 | 13.1 | 8.77  | 4.76  | 17.47  |
| 107895 | 'Mgat5'    | 5.22  | 4.39  | 2.4  | 1.4  | 9.23 | 4.69  | 4.24 | 3.85  | 8     | 5.4    |
| 107932 | 'Chd4'     | 7.38  | 8.06  | 5.68 | 9.48 | 11   | 10.73 | 6.31 | 6.7   | 14.04 | 10.15  |
| 107934 | 'Celsr3'   | 0.53  | 1.7   | 2.82 | 1.74 | 1.59 | 1.04  | 3.4  | 1.24  | 2.48  | 0.74   |
| 107939 | 'Pom121'   | 2.54  | 3.37  | 2.72 | 0.5  | 2.45 | 0.08  | 5.41 | 1.67  | 1.44  | 1.22   |
| 107951 | 'Cdk9'     | 9.48  | 3.38  | 6.34 | 41.2 | 20   | 9.25  | 10.4 | 8.32  | 11.34 | 1.84   |
| 107970 | 'Hist1h1t' | 0     | 0     | 0    | 0    | 0    | 0     | 0    | 0     | 2.06  | 0      |
| 107971 | 'Frs3'     | 7.55  | 21.24 | 23.3 | 0    | 10.9 | 23.39 | 15   | 23.05 | 29.51 | 13.07  |
| 107975 | 'Pacs1'    | 4.37  | 5.71  | 13.5 | 4.65 | 4.34 | 11.24 | 7.22 | 10.76 | 5.34  | 5.27   |
| 107976 | 'Babam2'   | 14.96 | 9.56  | 16.5 | 24   | 10.9 | 29.65 | 9.46 | 15.87 | 17.89 | 38.02  |
| 107986 | 'Ddb2'     | 2.5   | 10.45 | 3.84 | 5.75 | 0.33 | 10.67 | 20.8 | 10.56 | 8.54  | 15.27  |
| 107993 | 'Bfsp2'    | 0     | 2.2   | 3.56 | 0    | 0    | 0     | 6.09 | 0     | 0.03  | 0      |
| 107995 | 'Cdc20'    | 0.02  | 0     | 0    | 0    | 3.97 | 0     | 0    | 0     | 0     | 0      |
| 107999 | 'Gtpbp6'   | 17.54 | 9.88  | 16.1 | 24.3 | 23   | 24.05 | 11   | 10.28 | 15.95 | 11.19  |
| 108000 | 'Cenpf'    | 0.02  | 0.64  | 0.04 | 0.1  | 0.03 | 0.08  | 1.05 | 0.19  | 0.12  | 0.05   |
| 108011 | 'Ap4e1'    | 0.62  | 5     | 1.63 | 0.11 | 3.56 | 3.12  | 1.33 | 1.63  | 4.23  | 2.14   |
| 108012 | 'Ap1s2'    | 13.14 | 46.54 | 38.4 | 48   | 78   | 77.77 | 168  | 115.1 | 114.7 | 182.77 |
| 108013 | 'Celf4'    | 272.2 | 262.8 | 171  | 229  | 233  | 311.9 | 222  | 233.8 | 216.3 | 287.68 |
| 108014 | 'Srsf9'    | 11.47 | 7.63  | 5.69 | 24.7 | 9.43 | 3.8   | 3.98 | 9.18  | 5.28  | 7.96   |
| 108015 | 'Chrn4'    | 6.62  | 1.28  | 0.03 | 0.05 | 21.1 | 0.01  | 0.03 | 0     | 0     | 3.21   |
| 108017 | 'Fxyd4'    | 0     | 0.38  | 0    | 0    | 2.41 | 0     | 0.03 | 1.71  | 0     | 0      |
| 108030 | 'Lin7a'    | 3.42  | 6.97  | 5.99 | 8.14 | 3.61 | 10.59 | 10.6 | 7.87  | 5.16  | 6.26   |
| 108037 | 'Shmt2'    | 11.14 | 10.19 | 5.35 | 31.6 | 8.31 | 15.02 | 9.75 | 3.57  | 12.26 | 17.22  |
| 108043 | 'Chrn3'    | 1.29  | 0     | 0    | 0    | 0    | 0     | 0    | 0     | 0     | 0      |
| 108052 | 'Slc14a1'  | 3.18  | 6.62  | 3.94 | 0    | 0.38 | 0.19  | 6.16 | 2.08  | 3.43  | 0.93   |
| 108058 | 'Camk2d'   | 40.28 | 21.67 | 31.5 | 13.3 | 36.7 | 27.43 | 32.1 | 27.26 | 25.36 | 34.39  |
| 108062 | 'Cstf2'    | 22.9  | 24.23 | 26   | 8.62 | 15.2 | 11.3  | 19.7 | 22.03 | 21.77 | 34.2   |
| 108067 | 'Eif2b3'   | 20.21 | 20.6  | 29.9 | 68.9 | 43.9 | 51.92 | 28.7 | 49.8  | 29.85 | 47.84  |
| 108068 | 'Grm2'     | 1.95  | 0.89  | 2.06 | 0    | 10.8 | 7.97  | 6.14 | 1.88  | 3.54  | 8.18   |
| 108069 | 'Grm3'     | 2.24  | 5.38  | 1.33 | 0.48 | 0.63 | 0.13  | 0    | 2.15  | 0.74  | 1.16   |
| 108071 | 'Grm5'     | 15.66 | 5.23  | 7.53 | 8.02 | 10.5 | 6.91  | 24.1 | 5.38  | 8.11  | 4.58   |
| 108073 | 'Grm7'     | 21.06 | 10.09 | 18.7 | 45   | 12.7 | 7.23  | 47.7 | 17.67 | 30.33 | 26.33  |
| 108075 | 'Ltbp4'    | 3.12  | 6.39  | 2.74 | 5.84 | 3.46 | 3.69  | 3.69 | 4.51  | 1.86  | 8.45   |
| 108077 | 'Skiv2l'   | 19.43 | 21.51 | 25   | 5.73 | 25.2 | 12.72 | 15.9 | 8.97  | 11.37 | 21.01  |
| 108079 | 'Prkaa2'   | 3.43  | 1.93  | 0.78 | 2.79 | 3.96 | 0.93  | 0.12 | 1.62  | 1.12  | 3.02   |
| 108083 | 'Pip4k2b'  | 2.95  | 3.25  | 2.26 | 1.59 | 1.46 | 0.67  | 1.14 | 2.12  | 0.45  | 1.62   |
| 108086 | 'Rnf216'   | 13.57 | 10.64 | 10.6 | 3.54 | 10   | 5.3   | 6.59 | 14.23 | 8.92  | 6.11   |
| 108089 | 'Rnf144a'  | 0.95  | 0.68  | 0.94 | 0.36 | 0.98 | 0     | 3    | 0.98  | 2.58  | 0.01   |
| 108097 | 'Prkab2'   | 7.61  | 2.11  | 2.46 | 1.8  | 2.11 | 0.05  | 0    | 2.64  | 0     | 5.84   |
| 108098 | 'Med21'    | 91.07 | 105.5 | 79.9 | 137  | 97.5 | 82.33 | 82.6 | 108.4 | 104.5 | 72.35  |
| 108099 | 'Prkag2'   | 23.85 | 33.98 | 19.4 | 7.24 | 28.8 | 11.38 | 17.8 | 26.28 | 19.08 | 30.36  |
| 108100 | 'Baiap2'   | 29.28 | 76.06 | 34.9 | 60.4 | 41.6 | 16.81 | 33.7 | 15.38 | 16.45 | 15.28  |
| 108101 | 'Fermt3'   | 1.38  | 0     | 0    | 2.52 | 0    | 3.86  | 0    | 2.63  | 0.1   | 0      |
| 108105 | 'B3gnt5'   | 0     | 0.15  | 1.58 | 0    | 0    | 0     | 0    | 0.22  | 0     | 0      |
| 108112 | 'Eif4ebp3' | 0     | 0.69  | 2.19 | 0    | 1.23 | 1.76  | 4.69 | 1.9   | 0.15  | 0.95   |
| 108114 | 'Slc22a7'  | 0     | 0.02  | 0    | 0    | 0    | 0.02  | 0.2  | 0     | 0     | 0.09   |
| 108115 | 'Slco4a1'  | 1.98  | 0     | 4.04 | 1.09 | 1.99 | 0     | 4.1  | 0.1   | 5.04  | 8.62   |
| 108116 | 'Slco3a1'  | 5.06  | 5.83  | 1.79 | 7.81 | 4.16 | 4.49  | 20.7 | 5.06  | 2.33  | 3.63   |
| 108121 | 'U2af1'    | 97.71 | 82.15 | 125  | 93   | 80.7 | 138.7 | 116  | 130   | 162.6 | 98     |
| 108123 | 'Napg'     | 49.97 | 60.05 | 45.5 | 46.1 | 43.4 | 19.65 | 62.4 | 54.94 | 46.48 | 39.67  |
| 108124 | 'Napa'     | 233.1 | 283.7 | 211  | 241  | 292  | 310.5 | 241  | 316   | 271.6 | 262.24 |
| 108138 | 'Xrcc4'    | 4.94  | 10.68 | 5.25 | 1.45 | 16.8 | 10.91 | 12.2 | 4.07  | 20.76 | 6.7    |
| 108143 | 'Taf9'     | 147.1 | 167.5 | 147  | 264  | 138  | 163.7 | 136  | 156.3 | 166.2 | 120.46 |
| 108147 | 'Atic'     | 12.88 | 11.87 | 9.13 | 5.38 | 2.14 | 16.33 | 4.48 | 11.59 | 17.51 | 12.58  |
| 108148 | 'Galnt2'   | 8.91  | 7.66  | 5.59 | 9.62 | 6    | 8.04  | 8.4  | 11.82 | 7.45  | 11.16  |
| 108150 | 'Galnt7'   | 5.14  | 5.23  | 0.47 | 0.01 | 0.38 | 0     | 0.14 | 1.9   | 2.9   | 2.29   |
| 108151 | 'Sema3d'   | 1.29  | 1.72  | 1.08 | 0    | 0.01 | 1.82  | 1.6  | 0.46  | 1.51  | 0.19   |



|           |                |       |       |      |      |      |       |      |       |       |       |
|-----------|----------------|-------|-------|------|------|------|-------|------|-------|-------|-------|
| 108153    | 'Adamts7'      | 0     | 0.08  | 0    | 0    | 0    | 0     | 0    | 0.08  | 0     | 0     |
| 108154    | 'Adamts6'      | 0     | 0.06  | 7.07 | 7.3  | 1.39 | 0.01  | 0    | 0     | 0.57  | 0.01  |
| 108155    | 'Ogt'          | 51.55 | 46.8  | 50.3 | 40.4 | 43   | 34.36 | 56.4 | 47.31 | 48.72 | 59.48 |
| 108156    | 'Mthfd1'       | 10.07 | 20.72 | 35.6 | 23.9 | 16.9 | 8.86  | 31.8 | 24.52 | 20.98 | 19.93 |
| 108159    | 'Ubxn8'        | 4.89  | 10.58 | 6.74 | 18.5 | 11.1 | 14.67 | 28.4 | 12.56 | 8.01  | 16.25 |
| 108160    | 'Fam50a'       | 32.93 | 30.9  | 34.6 | 21.2 | 40.7 | 25.26 | 32.6 | 44.24 | 33.04 | 16.47 |
| 108167320 | 'LOC108167320' | 15.92 | 9.59  | 10.8 | 13.5 | 11   | 12.42 | 8.7  | 6.52  | 6.87  | 16.29 |
| 108167321 | 'LOC108167321' | 1.76  | 1.02  | 2.83 | 0.56 | 1.36 | 0.36  | 2.56 | 0.93  | 3.78  | 0.51  |
| 108167339 | 'LOC108167339' | 0.02  | 0.11  | 0.44 | 0    | 0.26 | 0.02  | 0.73 | 0.09  | 0.02  | 0.41  |
| 108167344 | 'Gm45951'      | 6.82  | 7.17  | 7.72 | 2.16 | 5.08 | 6.71  | 5.48 | 3.66  | 4.97  | 2.58  |
| 108167358 | 'LOC108167358' | 0.03  | 0.04  | 0.02 | 0.31 | 0.08 | 0.01  | 0.02 | 0.06  | 0.36  | 0.06  |
| 108167362 | 'Gm45961'      | 0.19  | 0.31  | 1.27 | 1.94 | 0.24 | 0.13  | 0.27 | 0.49  | 0.64  | 0.15  |
| 108167368 | 'LOC108167368' | 0.66  | 3.51  | 2.19 | 0.89 | 0.83 | 0.35  | 2.03 | 0.75  | 1.99  | 0.75  |
| 108167370 | 'Gm45965'      | 0     | 0     | 0    | 0    | 0.04 | 0     | 0    | 0     | 0     | 0     |
| 108167412 | 'Gm45975'      | 0     | 0     | 0    | 0    | 0    | 0.02  | 0    | 0     | 0     | 0     |
| 108167434 | 'Gm45988'      | 0.79  | 1.15  | 0    | 0    | 0.23 | 1.35  | 0    | 0     | 2.02  | 1.15  |
| 108167466 | 'Gm45618'      | 0     | 0.08  | 0    | 0    | 0    | 0     | 0    | 0     | 0     | 0.34  |
| 108167476 | 'Gm46008'      | 0.12  | 0.11  | 0.29 | 0.02 | 0.11 | 0     | 0.01 | 0.1   | 0     | 0     |
| 108167482 | 'Gm46011'      | 0.1   | 0.04  | 0.06 | 0    | 0.02 | 0     | 0    | 0.02  | 0     | 0.12  |
| 108167549 | '108167549'    | 0.33  | 0.12  | 0.67 | 0.34 | 0.85 | 1.64  | 0.29 | 0.29  | 0.65  | 0.08  |
| 108167560 | 'Gm46058'      | 0     | 0     | 2.8  | 2.83 | 0    | 0     | 0    | 0     | 0     | 0     |
| 108167571 | 'Gm43263'      | 1.56  | 1.14  | 0.56 | 3.87 | 2.56 | 1.04  | 1.13 | 0.64  | 0.44  | 0     |
| 108167576 | 'Gm46066'      | 1.16  | 0.59  | 0.44 | 3.77 | 0.66 | 1.03  | 0.46 | 1.47  | 0.1   | 0.72  |
| 108167614 | 'Gm46084'      | 0     | 0     | 0.54 | 0    | 0    | 0     | 0.67 | 0     | 0.03  | 0     |
| 108167694 | 'LOC108167694' | 1.24  | 1.54  | 1.95 | 2.83 | 1.05 | 1.69  | 1.39 | 0.86  | 0.46  | 1.2   |
| 108167700 | 'Gm46139'      | 0.17  | 0.02  | 0.05 | 0    | 0.98 | 0.92  | 0.61 | 1.07  | 0     | 0.19  |
| 108167735 | 'Gm46164'      | 0     | 0.72  | 0    | 0    | 0    | 0     | 0    | 0     | 0     | 0     |
| 108167752 | 'Gm46175'      | 0     | 0     | 2.37 | 0    | 0.06 | 0.01  | 0    | 0     | 0     | 0     |
| 108167806 | 'Gm46221'      | 0.37  | 0.36  | 0.15 | 0.08 | 0.53 | 1.37  | 0    | 0.26  | 0.23  | 0     |
| 108167809 | 'Gm46223'      | 0     | 0.23  | 0    | 0    | 0    | 0     | 0.41 | 0     | 0     | 0.9   |
| 108167814 | 'LOC108167814' | 0     | 0     | 0    | 0    | 0    | 0.02  | 0    | 0     | 0.03  | 0     |
| 108167830 | 'Gm46240'      | 0.16  | 0     | 0.13 | 0.21 | 0.14 | 0     | 0.05 | 0     | 0     | 0.08  |
| 108167848 | 'Gm12258'      | 7.15  | 3.7   | 2.62 | 7.35 | 2.82 | 2.39  | 0.01 | 4.17  | 1.18  | 6.93  |
| 108167855 | 'Gm46255'      | 0.66  | 0.33  | 0.79 | 0.02 | 0.03 | 0     | 0    | 0.58  | 0.3   | 0     |
| 108167858 | 'Gm46257'      | 0     | 0.89  | 0.22 | 0    | 0    | 5.11  | 2.12 | 0.28  | 1.9   | 0.63  |
| 108167883 | 'Gm46270'      | 0.29  | 0.48  | 3.12 | 0.25 | 0.49 | 0     | 0.22 | 0.52  | 0.12  | 1.42  |
| 108167886 | 'Gm46272'      | 0     | 0.05  | 0    | 0    | 0    | 3.06  | 0    | 0     | 0     | 0     |
| 108167918 | 'Gm46290'      | 0     | 0     | 0    | 3.45 | 0.35 | 0     | 0    | 0     | 2.15  | 0.12  |
| 108167922 | 'LOC108167922' | 0.09  | 0.16  | 0.15 | 0.12 | 0    | 0.04  | 0.12 | 0.01  | 0.23  | 0.07  |
| 108167925 | 'Gm46294'      | 0     | 0.51  | 0    | 1.7  | 0.99 | 1.69  | 0    | 0.83  | 0     | 0.27  |
| 108167946 | 'Gm46306'      | 0     | 0.07  | 0.06 | 0.49 | 0.19 | 0     | 0.69 | 0.1   | 0.05  | 0     |
| 108167951 | 'Gm46310'      | 0.28  | 0.1   | 0.85 | 0.15 | 0.51 | 0     | 0    | 0     | 0.14  | 0     |
| 108167961 | 'Gm46319'      | 0     | 0.13  | 0    | 0    | 0    | 0     | 0    | 0     | 0     | 0.06  |
| 108167963 | 'Gm46320'      | 0     | 0     | 0    | 0    | 0    | 0.07  | 0.07 | 0     | 0     | 0     |
| 108167986 | 'Gm46339'      | 0.43  | 1.5   | 1.37 | 0.81 | 0.69 | 0.19  | 0.44 | 0.35  | 1.16  | 0.27  |
| 108167989 | 'Gm46340'      | 0.11  | 0.16  | 0.87 | 0.29 | 0.08 | 0.02  | 0.36 | 0.81  | 0.28  | 0.19  |
| 108167995 | 'Gm46345'      | 0     | 0     | 0    | 0    | 0    | 0.37  | 0    | 0     | 0.25  | 0     |
| 108168003 | 'Gm46353'      | 0     | 0     | 0.4  | 0    | 0    | 0.71  | 0    | 0.49  | 0     | 0     |
| 108168034 | 'Gm46382'      | 0     | 0     | 0    | 0.28 | 0    | 0     | 0    | 0     | 0     | 0     |
| 108168049 | 'Gm46390'      | 0.77  | 2.45  | 3.25 | 0    | 5.76 | 0.42  | 0.12 | 1.54  | 2.23  | 1.26  |
| 108168067 | 'Gm46403'      | 1.52  | 1.95  | 1.71 | 8.3  | 1.86 | 3.97  | 2.74 | 1.16  | 3.69  | 3.49  |
| 108168097 | 'Gm46426'      | 0     | 0.18  | 0.06 | 0.07 | 0.13 | 0     | 0    | 0.1   | 0     | 0     |
| 108168098 | 'Gm46427'      | 0     | 0     | 0    | 0    | 0    | 0     | 0    | 0.03  | 0     | 0     |
| 108168101 | 'Gm46430'      | 10.15 | 8.24  | 5.34 | 11.1 | 9.49 | 0.44  | 8.6  | 8.17  | 2.93  | 6.86  |
| 108168108 | 'LOC108168108' | 0     | 0     | 0    | 0    | 0    | 0     | 0.02 | 0     | 0.03  | 0.7   |
| 108168152 | 'Gm8126'       | 0     | 0     | 0    | 0    | 0.05 | 0     | 0    | 0     | 0     | 0     |
| 108168162 | 'Gm43305'      | 1.4   | 4.29  | 10.3 | 10.6 | 18.6 | 12    | 14.7 | 12.96 | 7.74  | 2.97  |
| 108168219 | 'Gm46500'      | 0.28  | 0.27  | 0.37 | 0    | 0.45 | 0.01  | 1.27 | 0     | 0.4   | 0.03  |

|           |                |       |       |      |      |      |       |      |       |       |        |
|-----------|----------------|-------|-------|------|------|------|-------|------|-------|-------|--------|
| 108168225 | 'Gm26513'      | 0     | 0     | 0    | 1.5  | 0    | 0     | 0    | 0     | 0     | 0      |
| 108168226 | 'Gm46504'      | 0.13  | 0.14  | 0.77 | 0    | 0    | 1.2   | 0    | 0     | 0.25  | 0.19   |
| 108168313 | 'LOC108168313' | 0     | 0     | 0.16 | 0.55 | 0.24 | 0     | 0.08 | 0.13  | 0     | 0      |
| 108168323 | 'Gm46580'      | 0.37  | 0.33  | 0.03 | 0.24 | 1.23 | 0     | 0    | 0     | 1.02  | 0.42   |
| 108168336 | 'Gm46592'      | 0     | 0     | 0    | 0    | 0    | 0     | 0    | 0     | 0.04  | 0.01   |
| 108168358 | 'Gm46608'      | 0     | 0     | 0.84 | 0.87 | 1.11 | 2.52  | 0.54 | 0.86  | 0.56  | 0      |
| 108168367 | 'LOC108168367' | 0     | 0     | 0.99 | 0    | 0.46 | 4.08  | 0    | 0     | 0.12  | 0      |
| 108168395 | 'Gm45871'      | 1.99  | 1.71  | 2.88 | 0.42 | 2.91 | 0.92  | 3.47 | 6.71  | 6.51  | 4.79   |
| 108168405 | 'LOC108168405' | 0.32  | 0.04  | 0.07 | 0.46 | 0.3  | 0.56  | 0.04 | 0.36  | 0.12  | 0.26   |
| 108168534 | 'Gm46714'      | 0     | 0.69  | 1.02 | 1.88 | 0.03 | 0     | 0    | 0.14  | 0.89  | 0      |
| 108168543 | 'LOC108168543' | 0     | 0     | 0.12 | 0    | 0    | 0     | 0    | 0     | 0     | 0      |
| 108168553 | 'LOC108168553' | 0     | 0     | 0    | 0    | 0    | 0     | 0    | 0.23  | 0     | 0      |
| 108168572 | 'Gm46715'      | 0     | 0     | 0    | 0    | 0    | 0     | 0    | 0.04  | 0.02  | 0      |
| 108168573 | 'Gm46716'      | 0     | 0     | 0    | 0    | 0    | 0     | 0    | 0.04  | 0.02  | 0      |
| 108168574 | 'LOC108168574' | 0     | 0     | 0    | 0    | 0    | 0     | 0    | 0     | 0.31  | 0      |
| 108168644 | 'Gm46717'      | 0.16  | 0.2   | 0.22 | 0.18 | 0.24 | 0     | 0.04 | 0.02  | 0.05  | 0      |
| 108168679 | 'LOC108168679' | 6.61  | 12.99 | 13   | 8.94 | 0.07 | 16.61 | 7.15 | 4.55  | 2.92  | 10.34  |
| 108168680 | 'LOC108168680' | 0.01  | 0     | 0    | 0.12 | 0.01 | 0.01  | 0    | 0     | 0.02  | 0      |
| 108168683 | 'LOC108168683' | 0     | 0     | 0    | 0    | 0    | 0.06  | 0    | 0     | 0     | 0      |
| 108168685 | 'LOC108168685' | 0     | 0     | 0    | 0    | 0    | 0.06  | 0    | 0     | 0     | 0      |
| 108168691 | 'LOC108168691' | 0     | 0     | 0.55 | 2.11 | 0.71 | 1.08  | 0    | 0.45  | 0.55  | 0      |
| 108168724 | 'LOC108168724' | 0     | 0     | 0.08 | 0    | 0    | 0     | 0.43 | 0.21  | 0.45  | 0.6    |
| 108168740 | 'Gm46731'      | 2.29  | 0     | 0.04 | 0    | 0    | 0     | 0    | 0     | 2.81  | 0      |
| 108168771 | 'LOC108168771' | 1.46  | 1.2   | 2.71 | 3.09 | 1.41 | 1.61  | 1.25 | 0.96  | 1.87  | 2.21   |
| 108168884 | 'Gm37500'      | 0.03  | 1.61  | 0.99 | 0.55 | 4.39 | 0     | 2.82 | 0.24  | 0.54  | 2.14   |
| 108168906 | 'Gm43707'      | 0.06  | 0.01  | 0.52 | 0.01 | 0.01 | 0.33  | 0    | 0     | 0.27  | 0      |
| 108168936 | 'LOC108168936' | 0     | 0     | 0    | 0    | 0.15 | 0.63  | 0    | 0.01  | 0     | 0      |
| 108168952 | '108168952'    | 0.01  | 0     | 0    | 0.12 | 0.01 | 0.01  | 0    | 0     | 0.02  | 0      |
| 108168953 | 'Gm46858'      | 0     | 0     | 0    | 0    | 0    | 0.27  | 0    | 0     | 0     | 0      |
| 108168959 | 'LOC108168959' | 0.13  | 0.05  | 0    | 0    | 0    | 0     | 0    | 0     | 0     | 0.06   |
| 108168960 | 'Gm45533'      | 0     | 0     | 0    | 0    | 0    | 0     | 0    | 1.09  | 0     | 0      |
| 108168962 | 'LOC108168962' | 0     | 0.26  | 0.24 | 0.34 | 0.29 | 0     | 0    | 0.02  | 0     | 0      |
| 108169010 | 'LOC108169010' | 0.7   | 0     | 0    | 0.05 | 0    | 0.75  | 0    | 1.23  | 0     | 0      |
| 108169023 | 'Gm46901'      | 0     | 1.2   | 2.29 | 4.41 | 5.07 | 1.03  | 3.27 | 2.51  | 0.4   | 0.86   |
| 108169043 | 'Gm46911'      | 3.61  | 4.26  | 2.79 | 24.4 | 6.56 | 1.8   | 0.58 | 3.59  | 15.66 | 6.05   |
| 108169060 | 'LOC108169060' | 0.34  | 0.05  | 0.07 | 0.08 | 0    | 0.06  | 0.22 | 0.06  | 0.07  | 0.07   |
| 108169061 | 'Gm46918'      | 3.62  | 2.68  | 1.92 | 0.19 | 4.63 | 11.37 | 0    | 0.69  | 1.21  | 1.26   |
| 108169096 | 'Gm46933'      | 0     | 0.12  | 2.28 | 5.38 | 4.76 | 3.35  | 0.46 | 0.96  | 1.65  | 1.91   |
| 108169098 | 'Gm46934'      | 0     | 0     | 0    | 0    | 0    | 0.06  | 0    | 0     | 0     | 0      |
| 108169100 | 'LOC108169100' | 0     | 0     | 0    | 0    | 0    | 0.06  | 0    | 0     | 0     | 0      |
| 108169150 | 'Gm46963'      | 0     | 0.09  | 0.26 | 0    | 0    | 0     | 0    | 0     | 0     | 0      |
| 108169152 | 'Gm46965'      | 0     | 0     | 2.12 | 0    | 0    | 0     | 0    | 0     | 0     | 0.52   |
| 108169171 | 'Gm46977'      | 0     | 0     | 0    | 0    | 0    | 0     | 0    | 0     | 0.5   | 0      |
| 108169182 | 'Gm46982'      | 0.46  | 0.12  | 0    | 0    | 0    | 0.3   | 0.65 | 0     | 0.45  | 0      |
| 108169201 | 'Gm46988'      | 0     | 0     | 0.02 | 0    | 0    | 0.49  | 0    | 0     | 0     | 0      |
| 108645    | 'Mat2b'        | 107.8 | 73.24 | 74.8 | 84.6 | 102  | 102.2 | 145  | 94.34 | 112   | 64.19  |
| 108652    | 'Slc35b3'      | 5.46  | 7.91  | 11.2 | 12.4 | 8.4  | 15.03 | 1.54 | 14.3  | 6.21  | 11.27  |
| 108653    | 'Rimklb'       | 18.49 | 7.14  | 10.3 | 10.8 | 5.85 | 5.45  | 18.8 | 11.75 | 12.43 | 7.54   |
| 108654    | 'Fam210a'      | 1.69  | 5.14  | 3.26 | 0.41 | 1.02 | 2.21  | 3.06 | 2.86  | 4.44  | 1.73   |
| 108655    | 'Foxp1'        | 3.83  | 4.5   | 5.66 | 6.22 | 7.28 | 4.91  | 11   | 6.94  | 8.83  | 5.18   |
| 108657    | 'Rnpepl1'      | 0     | 6.95  | 5.42 | 3.34 | 2.94 | 1.84  | 3.98 | 1.49  | 0.81  | 1.54   |
| 108660    | 'Rnf187'       | 158.2 | 72.56 | 149  | 233  | 100  | 35.44 | 107  | 24.73 | 101.1 | 23.14  |
| 108664    | 'Atp6v1h'      | 178.8 | 228.6 | 215  | 169  | 166  | 202   | 197  | 234.4 | 206.5 | 209.23 |
| 108670    | 'Epsti1'       | 4.34  | 1.94  | 0    | 0    | 0    | 0     | 3.09 | 0.39  | 0     | 0      |
| 108671    | 'Dnajc9'       | 46.62 | 36.14 | 56.9 | 48.1 | 49.4 | 80.71 | 34.9 | 25.68 | 70.42 | 49.82  |
| 108672    | 'Zdhhc15'      | 0.02  | 0.9   | 3.4  | 0    | 0.8  | 0     | 1.71 | 0.78  | 1.44  | 1.72   |
| 108673    | 'Ccdc86'       | 9.96  | 9.57  | 4.41 | 4.43 | 13.9 | 15.98 | 12.8 | 13.92 | 9.52  | 12.26  |
| 108679    | 'Cops8'        | 122.2 | 131.1 | 131  | 84.2 | 145  | 218.7 | 121  | 140   | 140.7 | 110.88 |

|        |                 |       |       |      |      |      |       |      |       |       |        |
|--------|-----------------|-------|-------|------|------|------|-------|------|-------|-------|--------|
| 108682 | 'Gpt2'          | 9.24  | 8.41  | 9.66 | 9.81 | 4.81 | 6.04  | 23.2 | 5.03  | 8.32  | 0.63   |
| 108686 | 'Ccfdc88a'      | 3.24  | 4.06  | 3.34 | 5.2  | 5.72 | 4.06  | 4.38 | 3.58  | 1.99  | 6.95   |
| 108687 | 'Edem2'         | 31.1  | 28.4  | 26.1 | 44.6 | 5.11 | 21.3  | 10.4 | 22.77 | 28.42 | 30.02  |
| 108689 | 'Stn1'          | 5.33  | 4.51  | 11.8 | 15.2 | 17   | 8.3   | 15.2 | 15.67 | 9.18  | 11.91  |
| 108699 | 'Chn1'          | 87.77 | 120.7 | 80   | 79.6 | 64.7 | 80.37 | 64.9 | 104.5 | 41.29 | 34.95  |
| 108705 | 'Pttg1ip'       | 50.07 | 44.49 | 51.4 | 13.7 | 56   | 32.53 | 22.2 | 20.22 | 53.72 | 38.86  |
| 108707 | 'Fam207a'       | 10.7  | 15.33 | 25.6 | 12.6 | 8.1  | 19.28 | 15.5 | 7.94  | 32.45 | 4.96   |
| 108723 | 'Card11'        | 0     | 0     | 0    | 3.52 | 0    | 0     | 0    | 0     | 0     | 0      |
| 108735 | 'Sft2d2'        | 0.11  | 3.24  | 0.95 | 0    | 4.77 | 1.53  | 0.01 | 0.09  | 0.2   | 0.54   |
| 108737 | 'Oxsr1'         | 2.07  | 0.87  | 2.74 | 7.41 | 4.07 | 4.64  | 4.03 | 3.97  | 5.21  | 4.07   |
| 108755 | 'Lym2'          | 32.2  | 26.12 | 25.7 | 53.8 | 32.6 | 36.2  | 31.4 | 38.67 | 38.88 | 31.69  |
| 108760 | 'Galnt16'       | 92.29 | 109.6 | 78.3 | 53.5 | 69.5 | 55.84 | 91.2 | 70.69 | 78.89 | 180.97 |
| 108767 | 'Pnrc1'         | 13.47 | 14.07 | 6.92 | 18.5 | 6.98 | 13.49 | 3.44 | 11.53 | 9.94  | 16.99  |
| 108797 | 'Mex3b'         | 0.61  | 0.69  | 0    | 1.71 | 0.54 | 0     | 5.02 | 0.08  | 0     | 1.01   |
| 108800 | 'Ston2'         | 1.36  | 0.84  | 0.11 | 0.29 | 0.52 | 0.67  | 0.37 | 0.07  | 1.06  | 0.15   |
| 108802 | 'Calr4'         | 2.24  | 0     | 0    | 0    | 0    | 0     | 0    | 0     | 0     | 0      |
| 108811 | 'Ccfdc122'      | 0.04  | 0     | 0    | 0    | 1.08 | 0.56  | 0    | 0     | 0     | 0      |
| 108829 | 'Jmjd1c'        | 7.07  | 10.38 | 5.54 | 30.1 | 3.22 | 6.15  | 5.42 | 2.39  | 2.99  | 4.41   |
| 108832 | 'Tmem74b'       | 6.9   | 12.58 | 11   | 10.6 | 7.46 | 5.42  | 14.3 | 17.51 | 11.44 | 2.84   |
| 108837 | 'Ibtk'          | 1.78  | 1.69  | 3.15 | 2.38 | 1.33 | 4.46  | 4.4  | 2.85  | 3.2   | 1.79   |
| 108841 | 'Rdh13'         | 21.73 | 21.89 | 10.8 | 28.6 | 14.7 | 25.29 | 10.2 | 27.16 | 35.52 | 20.72  |
| 108853 | 'Mtrf1l'        | 4.02  | 3.97  | 6.49 | 5.83 | 5.79 | 2.2   | 0.68 | 1.54  | 3.73  | 0      |
| 108857 | 'Ankhd1'        | 2.17  | 1.83  | 2.84 | 4.56 | 2.64 | 1.58  | 3.84 | 3.13  | 2.99  | 2.19   |
| 108888 | 'Atad3a'        | 20.76 | 18.79 | 39.6 | 36.2 | 26.9 | 19.59 | 17.8 | 11.93 | 13.13 | 1.96   |
| 108897 | 'Aif1l'         | 1.08  | 0.98  | 3.66 | 0    | 0    | 0     | 0    | 0     | 0     | 0      |
| 108899 | '2700081O15Rik' | 3.08  | 1.39  | 1.9  | 0    | 3.87 | 0     | 3.15 | 1.85  | 10.46 | 0.82   |
| 108900 | 'Fam72a'        | 0.07  | 0     | 2.24 | 0    | 0    | 0     | 0.11 | 0.54  | 0     | 0      |
| 108902 | 'B4gat1'        | 159.7 | 156.2 | 176  | 132  | 144  | 203.1 | 135  | 169.4 | 156.2 | 145.86 |
| 108903 | 'Tbcd'          | 17.18 | 8.42  | 15.4 | 7.21 | 25.1 | 9.03  | 21   | 8.97  | 15.22 | 11.82  |
| 108907 | 'Nusap1'        | 0.02  | 1.71  | 0    | 0.06 | 0    | 0.51  | 0    | 0     | 0     | 0.04   |
| 108909 | 'Aida'          | 5.45  | 7.6   | 14.5 | 22.7 | 8.61 | 6.21  | 5.41 | 8.33  | 9.73  | 5.05   |
| 108911 | 'Rcc2'          | 11.9  | 13.52 | 4.35 | 10.2 | 11.2 | 6.9   | 4.65 | 4.32  | 9.85  | 9.94   |
| 108912 | 'Cdca2'         | 0     | 0     | 0    | 0    | 0    | 0     | 0    | 1.26  | 0     | 0      |
| 108927 | 'Lhfp'          | 7.53  | 18.17 | 4.24 | 1.25 | 18.7 | 11.19 | 7.02 | 8.15  | 10.37 | 13.28  |
| 108934 | 'Smim13'        | 3.39  | 4.22  | 3.54 | 3.66 | 8.12 | 2.56  | 8.27 | 4.79  | 11.04 | 4.57   |
| 108937 | 'Rnf169'        | 2.11  | 1.08  | 0.7  | 2.47 | 1.02 | 0.51  | 0.01 | 3.48  | 0.57  | 0.23   |
| 108943 | 'Trmt10a'       | 9.62  | 4.53  | 8.66 | 2.5  | 2.36 | 24.98 | 6.06 | 11.52 | 10.39 | 10.4   |
| 108946 | 'Zzz3'          | 3.66  | 0.77  | 3.23 | 0.21 | 3.6  | 0.92  | 0.3  | 2.84  | 5.42  | 7.48   |
| 108954 | 'Ppp1r15b'      | 1.31  | 7.18  | 6    | 6.73 | 2.77 | 0.58  | 2.49 | 3.97  | 6.33  | 4.6    |
| 108958 | 'Miga2'         | 15.56 | 25.24 | 36.7 | 3.91 | 39   | 8.11  | 30.6 | 20.83 | 24.43 | 28.69  |
| 108960 | 'Irak2'         | 10.62 | 10.84 | 4.71 | 8.47 | 15.5 | 8.42  | 5.01 | 7.25  | 8.66  | 4.22   |
| 108978 | '4930555G01Rik' | 0.92  | 1.15  | 1.67 | 0.84 | 0.47 | 0.4   | 1.06 | 0.56  | 0.41  | 0.97   |
| 108989 | 'Tpr'           | 7.14  | 8.91  | 8.49 | 17.3 | 10.4 | 13.37 | 8.36 | 8.42  | 10.52 | 4.49   |
| 108995 | 'Tbc1d10c'      | 0     | 0     | 0    | 5.73 | 0    | 0     | 0    | 0     | 6.26  | 0      |
| 109006 | 'Ciapin1'       | 85.69 | 38.62 | 74.6 | 67.5 | 58.4 | 76.35 | 61.6 | 63.89 | 61.86 | 77.51  |
| 109019 | 'Nabp1'         | 7.7   | 12.02 | 5.6  | 2.05 | 5.16 | 0.04  | 16.3 | 1.19  | 0.58  | 4.73   |
| 109032 | 'Sp110'         | 0     | 0.05  | 0.03 | 0    | 0.06 | 0.03  | 0    | 0.05  | 0.07  | 6.62   |
| 109042 | 'Cavin3'        | 27.45 | 21.68 | 24.1 | 7.26 | 14.1 | 29.84 | 18.5 | 9.56  | 10.86 | 20.52  |
| 109050 | 'Inka2'         | 0.01  | 0     | 4.42 | 0.38 | 1.85 | 5.68  | 1.57 | 0     | 2.51  | 7.46   |
| 109054 | 'Pfdn4'         | 37.66 | 59.17 | 39.2 | 44.5 | 36.6 | 42.68 | 38.3 | 39.65 | 45.29 | 35.77  |
| 109065 | 'Dnaaf2'        | 3.56  | 7.4   | 10.7 | 29.5 | 2.24 | 6.13  | 5.41 | 7.31  | 3.51  | 6.11   |
| 109075 | 'Exosc4'        | 70.11 | 53.38 | 44   | 34.8 | 55.8 | 58.15 | 32.7 | 48.97 | 51.42 | 61.41  |
| 109077 | 'Ints5'         | 5.19  | 2.62  | 3.54 | 0.02 | 4.39 | 3.94  | 3.64 | 8.63  | 0.89  | 3.42   |
| 109079 | 'Sephs1'        | 0.25  | 2.29  | 3.77 | 3.65 | 1.52 | 5.2   | 6.14 | 1.47  | 4.11  | 3.95   |
| 109082 | 'Fbxw17'        | 29.34 | 26.85 | 8.81 | 0.17 | 11.1 | 28.04 | 8.63 | 9.29  | 17.89 | 35.29  |
| 109093 | 'Rars2'         | 23.14 | 24.55 | 21.8 | 49   | 23.7 | 21.83 | 29.8 | 48.58 | 37.76 | 16.94  |
| 109095 | 'Rbm15b'        | 2.62  | 4.17  | 2.42 | 8.23 | 0.11 | 0.3   | 4.8  | 5.47  | 1.49  | 1.29   |
| 109108 | 'Slc30a9'       | 31.83 | 28.28 | 31.9 | 51.9 | 25.1 | 18.45 | 32   | 20.41 | 50.76 | 6.38   |

|        |              |       |       |      |      |      |       |      |       |       |        |
|--------|--------------|-------|-------|------|------|------|-------|------|-------|-------|--------|
| 109113 | 'Uhrf2'      | 8.05  | 7.94  | 5.07 | 0.98 | 4.34 | 6.07  | 4.36 | 2.74  | 5.34  | 5      |
| 109115 | 'Supt3'      | 6.24  | 7.97  | 9.05 | 5.25 | 14   | 4.46  | 13.6 | 3.52  | 7.92  | 9.65   |
| 109129 | 'Mmadhc'     | 48.25 | 78.27 | 63.4 | 56.3 | 70.6 | 41.8  | 69.7 | 48.86 | 59.64 | 62.14  |
| 109135 | 'Plekha5'    | 5.98  | 5.79  | 6.16 | 3.42 | 10.8 | 9.8   | 9.34 | 9.27  | 7.32  | 6.7    |
| 109136 | 'Mmaa'       | 1.98  | 14.69 | 6.57 | 6.55 | 10.6 | 11.53 | 4.75 | 7.25  | 5.76  | 15.01  |
| 109145 | 'Gins4'      | 36.6  | 34.89 | 2.3  | 9.58 | 33.7 | 44.82 | 33.4 | 34.18 | 32.34 | 15.09  |
| 109151 | 'Chd9'       | 4.24  | 5.25  | 4.55 | 3.34 | 7.7  | 4.04  | 3.92 | 3.85  | 4.9   | 3.59   |
| 109154 | 'Mlec'       | 12.22 | 8.69  | 8.38 | 14.1 | 10.5 | 4.94  | 8.75 | 7.23  | 16.78 | 7.95   |
| 109161 | 'Ube2q2'     | 14.29 | 16.09 | 15.1 | 19.4 | 13.9 | 13.45 | 18.5 | 10.95 | 17.42 | 17.27  |
| 109168 | 'Atl3'       | 2.28  | 0     | 0.16 | 0.47 | 0.62 | 1.12  | 0.65 | 0.7   | 0.59  | 0      |
| 109169 | 'Igip'       | 12.11 | 4.22  | 9.26 | 2.86 | 7.48 | 22.73 | 18.3 | 1.24  | 8.75  | 3.46   |
| 109181 | 'Trip11'     | 5.64  | 8.52  | 8.84 | 12.9 | 14.5 | 14.14 | 8.89 | 7.19  | 11.84 | 10.59  |
| 109205 | 'Sobp'       | 4.01  | 0.67  | 2.5  | 7.08 | 2.05 | 1.95  | 1.47 | 0.58  | 0.93  | 3.88   |
| 109222 | 'Rarres1'    | 0     | 0     | 0.03 | 0    | 0    | 5.14  | 0    | 0     | 1.95  | 0      |
| 109229 | 'Fam118b'    | 19.93 | 25.66 | 15.5 | 14.5 | 24.2 | 6.62  | 5.26 | 23.03 | 15.02 | 5.8    |
| 109232 | 'Sccpdh'     | 252.4 | 220.6 | 167  | 309  | 126  | 203.6 | 114  | 208.6 | 127.8 | 120.41 |
| 109241 | 'Mbd5'       | 7.23  | 5.89  | 5.39 | 5.74 | 3.52 | 3.31  | 10.7 | 5.89  | 2.32  | 4.45   |
| 109242 | 'Kif24'      | 0.01  | 0.46  | 0.17 | 1.63 | 0.02 | 0.08  | 1.92 | 0.13  | 0.03  | 0.46   |
| 109245 | 'Lrrc39'     | 0.42  | 0.04  | 0.97 | 0.1  | 0.04 | 0.04  | 0.08 | 0.19  | 3.43  | 3.54   |
| 109246 | 'Tspan9'     | 5.75  | 3.27  | 1.37 | 0.02 | 6.21 | 5.41  | 0.01 | 2.8   | 0     | 0.02   |
| 109263 | 'Rlf'        | 0.93  | 2.26  | 2.41 | 5.72 | 1.85 | 1.69  | 1    | 0.91  | 4.29  | 2.14   |
| 109264 | 'Me3'        | 16.28 | 4.09  | 18   | 19.9 | 30.5 | 25.22 | 9.29 | 28.65 | 8.71  | 12.83  |
| 109267 | 'Ssc4d'      | 1.68  | 0     | 0.11 | 0    | 0.29 | 0     | 0    | 0.07  | 2.42  | 0.03   |
| 109270 | 'Prr5'       | 14.26 | 19.66 | 26.1 | 21.6 | 10.7 | 8.52  | 16.4 | 32.15 | 21.48 | 15.29  |
| 109275 | 'Actr5'      | 0.25  | 2.23  | 1.64 | 0.05 | 5.09 | 0     | 6.67 | 0     | 0     | 2.81   |
| 109284 | 'R3hdm4'     | 26.97 | 34.05 | 55.2 | 26.2 | 86.5 | 36.21 | 40.5 | 39.26 | 10.39 | 21.19  |
| 109294 | 'Prex2'      | 1.01  | 0.64  | 0.46 | 0    | 0    | 0.53  | 1.23 | 1.1   | 0.71  | 0.01   |
| 109299 | 'Tmem250-ps' | 149.5 | 163.4 | 72.8 | 109  | 195  | 243.7 | 137  | 189   | 149.6 | 231.94 |
| 109305 | 'Orai1'      | 0.17  | 0     | 7.23 | 0    | 0    | 2.28  | 0    | 0     | 0     | 0      |
| 109331 | 'Rnf20'      | 6.84  | 11.19 | 8.27 | 4.15 | 7.45 | 9.47  | 10.7 | 8.4   | 9.71  | 7.09   |
| 109332 | 'Cdcp1'      | 0     | 0.1   | 1.63 | 0    | 0    | 0     | 0    | 0.22  | 0.05  | 3.39   |
| 109333 | 'Pkn2'       | 0.01  | 0.11  | 3.25 | 1.28 | 0.07 | 0.88  | 1.06 | 0.04  | 0.04  | 1.97   |
| 109346 | 'Ankrd39'    | 16.25 | 25.08 | 36.5 | 19   | 31.3 | 13.89 | 24   | 23.27 | 21.22 | 53.56  |
| 109349 | 'Fam163b'    | 19.86 | 10.3  | 9.98 | 6.66 | 16.2 | 2.45  | 8.05 | 26.43 | 5.83  | 9.23   |
| 109359 | 'Abraxas2'   | 24.88 | 16.52 | 11   | 7.14 | 6.12 | 10.68 | 4.42 | 16.73 | 12.57 | 19.93  |
| 109552 | 'Sri'        | 37.62 | 29.48 | 38.6 | 14.5 | 72.1 | 45.53 | 66.3 | 50.42 | 53.5  | 34.32  |
| 109575 | 'Tbx10'      | 0     | 0     | 0    | 0    | 0    | 1.94  | 0.05 | 0     | 0     | 0.02   |
| 109593 | 'Lmo3'       | 5.24  | 23.48 | 5.75 | 0.06 | 24.2 | 7.63  | 17.8 | 8.85  | 0.08  | 3.24   |
| 109594 | 'Lmo1'       | 54.19 | 33.17 | 4.84 | 0    | 0    | 12.47 | 14.3 | 9.62  | 8.17  | 18.89  |
| 109620 | 'Dsp'        | 0.02  | 0     | 0.06 | 0    | 0.01 | 0.03  | 0.03 | 0.01  | 0.02  | 0.01   |
| 109624 | 'Cald1'      | 1.28  | 1.09  | 2.31 | 3.88 | 1.26 | 3.76  | 3.75 | 0.77  | 4.97  | 6.19   |
| 109637 | 'Upk1a'      | 0     | 0.15  | 0.04 | 0    | 2.69 | 0     | 0    | 0     | 2.51  | 0      |
| 109648 | 'Npy'        | 3.78  | 0     | 0    | 0    | 0    | 0     | 0    | 6.54  | 0     | 0      |
| 109652 | 'Acy1'       | 4.47  | 15.31 | 1.79 | 5.54 | 3.5  | 7.51  | 0    | 13.13 | 9.95  | 6.22   |
| 109658 | 'Txlna'      | 6.23  | 17.74 | 5.77 | 14.6 | 5.57 | 6.06  | 4.07 | 12.62 | 8.86  | 9.13   |
| 109660 | 'Ctrl'       | 1.88  | 0     | 0.11 | 8.42 | 2.03 | 0     | 0    | 5.58  | 0     | 2.47   |
| 109672 | 'Cyb5a'      | 130   | 160.8 | 85.5 | 170  | 111  | 183.7 | 192  | 103.2 | 117.8 | 166.02 |
| 109674 | 'Ampd2'      | 54.66 | 52.89 | 55.7 | 30.1 | 40.7 | 48.09 | 54.6 | 60.34 | 116.9 | 117.99 |
| 109676 | 'Ank2'       | 10.61 | 7.13  | 19.7 | 11.5 | 12.9 | 14.68 | 17.9 | 9.32  | 9.5   | 11.58  |
| 109685 | 'Hyal3'      | 1.43  | 5.68  | 3.02 | 0.45 | 0.09 | 0.16  | 0.21 | 2.35  | 8.22  | 0.26   |
| 109689 | 'Arrb1'      | 6.57  | 3.53  | 2.94 | 1.13 | 2.03 | 4.08  | 13.3 | 5.59  | 8.09  | 3.15   |
| 109711 | 'Actn1'      | 0.74  | 0.67  | 1.58 | 0.62 | 0.58 | 0.35  | 1.55 | 0.16  | 0.97  | 0.59   |
| 109731 | 'Maob'       | 9.53  | 10.55 | 17.7 | 11.1 | 2.99 | 32.43 | 11.4 | 47.76 | 26.82 | 6.21   |
| 109754 | 'Cyb5r3'     | 113.9 | 116.8 | 143  | 98.4 | 170  | 125.4 | 84.4 | 108.5 | 137.4 | 151.03 |
| 109778 | 'Blvra'      | 30.71 | 31.51 | 39.4 | 43.9 | 22.8 | 30.63 | 32   | 40.31 | 48.57 | 62.04  |
| 109785 | 'Pgm3'       | 20.15 | 17.76 | 23.3 | 29.6 | 3.17 | 20.68 | 19.6 | 29.11 | 31.9  | 29.67  |
| 109801 | 'Glo1'       | 127.9 | 133.6 | 65   | 49.1 | 111  | 130.3 | 75.9 | 80.19 | 101.4 | 119.42 |
| 109815 | 'Selenos'    | 63.5  | 54.01 | 52.7 | 157  | 40.5 | 48.1  | 81.7 | 89.7  | 86.73 | 72.85  |

|        |           |       |       |      |      |      |       |      |       |       |         |
|--------|-----------|-------|-------|------|------|------|-------|------|-------|-------|---------|
| 109828 | 'C7'      | 0.02  | 0     | 0.37 | 0    | 0    | 0.02  | 0    | 0     | 0     | 0.42    |
| 109857 | 'Cbr3'    | 0.08  | 3.72  | 9.68 | 0    | 3.37 | 8.54  | 8.93 | 0     | 0     | 0       |
| 109880 | 'Braf'    | 4.75  | 6.21  | 5.69 | 5.78 | 6.95 | 5.37  | 4.61 | 4.76  | 2.55  | 2.11    |
| 109889 | 'Mzf1'    | 2.71  | 4.48  | 3.1  | 0.02 | 7.27 | 11.12 | 8.27 | 7.77  | 6.17  | 6.71    |
| 109900 | 'Asl'     | 25.06 | 51.79 | 51.5 | 67.4 | 42   | 66.1  | 43.8 | 38.04 | 123.2 | 45.69   |
| 109901 | 'Cela1'   | 1.64  | 3.13  | 0    | 0    | 5.81 | 0     | 0    | 0     | 0     | 0       |
| 109904 | 'Mcf2'    | 0.07  | 0     | 0    | 1.24 | 2.73 | 0.33  | 3.26 | 1.35  | 1.49  | 0       |
| 109905 | 'Rap1a'   | 8.2   | 12.4  | 11.7 | 10.2 | 11.7 | 18.94 | 9.07 | 7.95  | 5.81  | 4.38    |
| 109910 | 'Zfp91'   | 3.98  | 3.07  | 3.03 | 7.93 | 4.11 | 2.39  | 2.49 | 1.94  | 1.59  | 1.06    |
| 109929 | 'Zbtb25'  | 6.82  | 5.68  | 6.33 | 9.89 | 6.11 | 3.24  | 11.3 | 12.66 | 6.48  | 6.1     |
| 109934 | 'Abr'     | 39.89 | 57.31 | 61.8 | 40.6 | 25.1 | 12.53 | 50.3 | 32.28 | 26.57 | 32.78   |
| 109959 | 'Amy2a5'  | 0     | 0     | 1.38 | 0    | 0    | 0     | 0    | 0     | 0     | 0       |
| 109978 | 'Art4'    | 0     | 0     | 0.02 | 0    | 0    | 0     | 0    | 0     | 0     | 0       |
| 109979 | 'Art3'    | 0.16  | 0.04  | 0.26 | 0.09 | 0    | 0.07  | 0.19 | 0.03  | 0.14  | 0.1     |
| 110006 | 'Gusb'    | 13.41 | 11.79 | 9.18 | 19.2 | 15.1 | 33.91 | 24.9 | 12.26 | 27.41 | 23.54   |
| 110012 | 'Tpgs1'   | 128.3 | 115.9 | 129  | 161  | 144  | 147.2 | 168  | 179.2 | 154.5 | 169.83  |
| 110033 | 'Kif22'   | 1.64  | 0.84  | 0.21 | 1.96 | 4.54 | 2.41  | 1.31 | 0.56  | 0.08  | 0.02    |
| 110052 | 'Dek'     | 15.15 | 14.29 | 20.4 | 27.7 | 16.7 | 6.96  | 34   | 12.63 | 20.24 | 7.55    |
| 110058 | 'Syt17'   | 15.63 | 2.09  | 27.8 | 10.9 | 23.8 | 19.69 | 7.76 | 9.59  | 5.18  | 6.63    |
| 110074 | 'Dut'     | 22.98 | 24.73 | 24.5 | 17.5 | 17.9 | 27.91 | 26.6 | 23.32 | 22.13 | 25.36   |
| 110075 | 'Bmp3'    | 0     | 2.95  | 5.38 | 5.31 | 0.01 | 0     | 7.66 | 0.26  | 0     | 0       |
| 110078 | 'Pygb'    | 68.45 | 53.53 | 61.2 | 23.6 | 43.3 | 29.45 | 73.2 | 58.82 | 91.91 | 54.81   |
| 110082 | 'Dnah5'   | 0     | 0.39  | 0.69 | 0.34 | 0    | 0     | 0    | 0.15  | 0     | 0.4     |
| 110083 | 'Dnah12'  | 0.64  | 0.94  | 0.69 | 0.18 | 0.07 | 0.01  | 0.03 | 0.83  | 0.03  | 0.17    |
| 110084 | 'Dnah1'   | 6.65  | 13.76 | 9.07 | 5.83 | 16.6 | 3.72  | 10.1 | 6.51  | 7.15  | 15.56   |
| 110094 | 'Phka2'   | 1.94  | 2.78  | 6.34 | 8.53 | 1.57 | 9.05  | 4.11 | 3.76  | 2.61  | 5.48    |
| 110095 | 'Pygl'    | 2.69  | 2.62  | 2.28 | 0    | 0    | 1.01  | 0    | 5.52  | 0     | 3.85    |
| 110109 | 'Nop2'    | 23.7  | 24.97 | 20   | 17.3 | 17.2 | 23.58 | 18.7 | 20.81 | 18.89 | 18.27   |
| 110119 | 'Mpi'     | 78.61 | 22.73 | 42.9 | 110  | 69.9 | 93.7  | 66.7 | 78.12 | 53.53 | 42.12   |
| 110147 | 'Ehmt2'   | 8.05  | 13.31 | 9.88 | 9.23 | 18.4 | 8.8   | 5.6  | 4.08  | 3.54  | 3.79    |
| 110157 | 'Raf1'    | 11.27 | 5.38  | 25.2 | 29.4 | 7.48 | 4.27  | 18.5 | 15    | 5.59  | 4.69    |
| 110168 | 'Gpr18'   | 0     | 0.86  | 0    | 0    | 0    | 0     | 0    | 0     | 0     | 0       |
| 110172 | 'Slc35b1' | 76.26 | 74.49 | 75.7 | 61   | 85.9 | 109.2 | 96.5 | 103.9 | 72.64 | 71.87   |
| 110173 | 'Manba'   | 7.38  | 0.41  | 6.9  | 0.92 | 0.99 | 2.27  | 4.39 | 3.47  | 8     | 20.49   |
| 110175 | 'Ggct'    | 15.02 | 23.72 | 18.6 | 13.3 | 16   | 20.93 | 13.9 | 8.07  | 19.46 | 8.17    |
| 110196 | 'Fdps'    | 204.1 | 142.2 | 201  | 326  | 201  | 258.9 | 192  | 197   | 157.5 | 191     |
| 110197 | 'Dgkg'    | 27.7  | 29.38 | 27.2 | 13.8 | 13.2 | 5.37  | 27.4 | 31.7  | 23.17 | 29      |
| 110198 | 'Akr7a5'  | 38.4  | 44.96 | 44.3 | 4.86 | 27.4 | 63.84 | 54.6 | 29.29 | 40.01 | 45.82   |
| 110208 | 'Pgd'     | 24.56 | 49.4  | 38.4 | 39.6 | 12.3 | 54.7  | 47.2 | 31.53 | 19.88 | 26.68   |
| 110213 | 'Tmbim6'  | 265.5 | 273.4 | 285  | 253  | 270  | 412.1 | 294  | 301.3 | 308.7 | 325.51  |
| 110253 | 'Triobp'  | 0.93  | 0.92  | 0    | 0    | 0.04 | 0     | 0    | 2.39  | 0.05  | 0.05    |
| 110257 | 'Hba-a2'  | 19.05 | 0     | 23.1 | 45.4 | 9.34 | 14.66 | 0    | 14.75 | 21.29 | 3.57    |
| 110265 | 'Msra'    | 21.75 | 3.38  | 24.9 | 9.07 | 5.03 | 19.09 | 35.4 | 52.15 | 11.84 | 10.19   |
| 110279 | 'Bcr'     | 4.44  | 1.76  | 2.65 | 12.5 | 5.85 | 3.01  | 2.31 | 2.81  | 2.35  | 7.92    |
| 110304 | 'Gfra3'   | 7.25  | 19.66 | 1.42 | 0.04 | 1.32 | 2.91  | 1.83 | 6.06  | 5.71  | 4.57    |
| 110323 | 'Cox6b1'  | 1219  | 1097  | 1389 | 1389 | 1165 | 1729  | 1334 | 956.6 | 1563  | 1216.78 |
| 110326 | 'Tas1r1'  | 1.03  | 3.6   | 1.37 | 0    | 2.75 | 0     | 0.02 | 0.87  | 0.7   | 0.02    |
| 110332 | 'Pp2d1'   | 0.67  | 0.02  | 0    | 0    | 0.09 | 0     | 0.34 | 1.79  | 1.15  | 1.02    |
| 110350 | 'Dync2h1' | 10.22 | 8.34  | 4.26 | 10.1 | 8.48 | 4.61  | 4.8  | 7.63  | 8.08  | 18.91   |
| 110351 | 'Rap1gap' | 53.05 | 34.56 | 77   | 46.2 | 37.5 | 35.35 | 73.3 | 42.69 | 82.45 | 31.03   |
| 110355 | 'Grk2'    | 10.23 | 10.68 | 7.19 | 5.51 | 19.8 | 19.38 | 7.12 | 8.95  | 19.44 | 9.13    |
| 110379 | 'Sec13'   | 92.67 | 98.6  | 112  | 97.3 | 98   | 135   | 119  | 95.16 | 100.1 | 139.74  |
| 110380 | 'Shroom2' | 9.59  | 15    | 13.6 | 9.5  | 10.5 | 2.55  | 20.6 | 18.11 | 8.04  | 8.05    |
| 110385 | 'Pde4c'   | 0.1   | 0.07  | 0.17 | 0.15 | 0.03 | 0.11  | 0.18 | 0.08  | 0     | 0.07    |
| 110391 | 'Qdpr'    | 282.7 | 233   | 207  | 212  | 391  | 498.1 | 171  | 222.7 | 262.8 | 276.63  |
| 110417 | 'Pigh'    | 5.18  | 15.54 | 3.26 | 6.76 | 14.5 | 3.11  | 15.3 | 24.53 | 10.6  | 11.99   |
| 110446 | 'Acat1'   | 66.48 | 49.45 | 61   | 46.8 | 43.9 | 65.34 | 98.4 | 60.93 | 71.03 | 56.06   |
| 110454 | 'Ly6a'    | 0     | 0     | 0    | 0    | 0    | 5.54  | 0    | 0     | 0     | 0       |

|        |               |       |       |      |      |      |       |      |       |       |        |
|--------|---------------|-------|-------|------|------|------|-------|------|-------|-------|--------|
| 110460 | 'Acat2'       | 82.28 | 66.31 | 71.5 | 85.2 | 72.3 | 58.77 | 86.1 | 79.65 | 61.28 | 51.44  |
| 110521 | 'Hivep1'      | 0.56  | 0.75  | 4.42 | 0.32 | 0.31 | 0.66  | 0.5  | 0.77  | 0.02  | 0.6    |
| 110524 | 'Dgkq'        | 12.91 | 7.4   | 14.9 | 18.8 | 6.43 | 10.88 | 14.8 | 10.81 | 19.66 | 3.89   |
| 110532 | 'Adarb1'      | 6.82  | 0.7   | 2.95 | 3.86 | 6.41 | 2.81  | 6.4  | 3.99  | 3.45  | 3.2    |
| 110542 | 'Amhr2'       | 0     | 0.32  | 0    | 0.03 | 0.08 | 5.3   | 0    | 0     | 0     | 0.73   |
| 110557 | 'H2-Q6'       | 0     | 0     | 0    | 0    | 0    | 0.14  | 0    | 0     | 0     | 0      |
| 110558 | 'H2-Q9'       | 0     | 0.41  | 0.03 | 0.6  | 0.82 | 1.03  | 0    | 0.43  | 1.55  | 0      |
| 110593 | 'Prdm2'       | 5.4   | 3.32  | 7.33 | 7.01 | 3.8  | 4.73  | 3.02 | 2.87  | 4.4   | 5.91   |
| 110595 | 'Timp4'       | 37.99 | 23.24 | 21.5 | 3.38 | 5.31 | 19.48 | 31.8 | 12.93 | 10.98 | 12.06  |
| 110596 | 'Arhgef28'    | 5.39  | 6.55  | 5.44 | 2.37 | 6.48 | 6.11  | 1.41 | 5.68  | 4.07  | 4.44   |
| 110606 | 'Fntb'        | 24.74 | 45.45 | 21.8 | 21.2 | 22.1 | 14.07 | 12.4 | 34.86 | 23.7  | 26.02  |
| 110611 | 'Hdlbp'       | 12.93 | 11.6  | 18.7 | 12.4 | 11.1 | 1.69  | 18.5 | 9.02  | 5.66  | 14.83  |
| 110616 | 'Atxn3'       | 0.14  | 3.53  | 3    | 3.86 | 6.46 | 0     | 3.79 | 1.28  | 2.23  | 4.2    |
| 110637 | 'Grik4'       | 1.13  | 6.24  | 1.07 | 2.97 | 7.76 | 0.64  | 15.5 | 2.92  | 15.41 | 7.62   |
| 110639 | 'Prps2'       | 2.54  | 8.75  | 17   | 5.11 | 7.31 | 1.12  | 7.36 | 4.55  | 11.36 | 4.56   |
| 110648 | 'Lmx1a'       | 0     | 0     | 0    | 0.51 | 0    | 0     | 0    | 0     | 0     | 0.45   |
| 110651 | 'Rps6ka3'     | 0.01  | 0.13  | 0.01 | 0.62 | 0.05 | 0     | 1.56 | 0     | 0.73  | 0      |
| 110695 | 'Aldh7a1'     | 29.01 | 19.66 | 13.1 | 5.97 | 13.8 | 38.72 | 21   | 9.8   | 17.95 | 28.56  |
| 110749 | 'Chaf1b'      | 0     | 0.63  | 0.04 | 0    | 0    | 0     | 0    | 0     | 0     | 0      |
| 110750 | 'Cse1l'       | 31.7  | 17.56 | 26.4 | 11.1 | 13.7 | 10.1  | 30.3 | 32.08 | 16.27 | 37.79  |
| 110751 | 'Adam33'      | 0.02  | 8.26  | 0    | 0    | 0    | 0     | 0    | 0     | 0.06  | 3      |
| 110784 | 'Nr3c2'       | 3.42  | 1.35  | 4.57 | 5.58 | 0.24 | 1.97  | 1.15 | 1.39  | 1.39  | 1.39   |
| 110789 | 'Adgrv1'      | 0.16  | 0.18  | 0    | 0.01 | 0.42 | 0     | 0    | 0.01  | 0     | 0.03   |
| 110796 | 'Tshz1'       | 0.04  | 1     | 0.09 | 1.5  | 1.38 | 0.17  | 0.51 | 0     | 0.01  | 1.96   |
| 110809 | 'Srsf1'       | 7.24  | 9.43  | 10.5 | 14.3 | 7.88 | 5.71  | 9.87 | 6.98  | 9.24  | 7.25   |
| 110816 | 'Pwp2'        | 5.26  | 8.37  | 13.8 | 15.3 | 1.95 | 4.05  | 6.28 | 5.23  | 3.96  | 10.64  |
| 110821 | 'Pcca'        | 10.81 | 13.13 | 8.65 | 15.4 | 19.8 | 13.7  | 2.32 | 15.85 | 0.78  | 20.98  |
| 110826 | 'Etfb'        | 139.2 | 120.5 | 134  | 157  | 163  | 210.8 | 74   | 147.8 | 140.5 | 134.23 |
| 110829 | 'Lims1'       | 10.19 | 3.77  | 7.81 | 4.24 | 5.98 | 7.35  | 4.52 | 5.09  | 6.87  | 2.81   |
| 110834 | 'Chrna3'      | 22.84 | 4.6   | 18.7 | 5.12 | 0.14 | 0     | 2.19 | 1.47  | 0     | 6.34   |
| 110842 | 'Etf1a'       | 51.54 | 42.88 | 63.7 | 53.4 | 60.8 | 97.03 | 36   | 61.32 | 89.64 | 51.6   |
| 110854 | 'Ptpa'        | 132.2 | 126.4 | 135  | 78.1 | 88.9 | 113.9 | 156  | 130.6 | 141.5 | 122.3  |
| 110862 | 'Kcnq3'       | 1.27  | 3.55  | 0.09 | 0.24 | 2.54 | 1.46  | 0.83 | 0.31  | 0.11  | 2.88   |
| 110876 | 'Scn2a'       | 14.8  | 13.77 | 24.2 | 17.7 | 18.3 | 12.38 | 27.5 | 15.91 | 12.85 | 23.12  |
| 110877 | 'Slc18a1'     | 0     | 0.56  | 0.97 | 0    | 2.67 | 1.42  | 0    | 0     | 1.46  | 5.96   |
| 110880 | 'Scn4a'       | 0.01  | 0     | 0    | 0    | 0    | 0.01  | 0    | 0     | 0     | 0      |
| 110886 | 'Gabra5'      | 16.21 | 36.77 | 32.9 | 54.2 | 20.2 | 10.55 | 28.9 | 86.78 | 29.47 | 15.06  |
| 110891 | 'Slc8a2'      | 0.33  | 0.42  | 0.6  | 0.83 | 0.03 | 0.26  | 0.21 | 1.11  | 0.04  | 0      |
| 110893 | 'Slc8a3'      | 7.03  | 2.11  | 9.15 | 12.6 | 5.07 | 9.65  | 10.7 | 4.32  | 2.88  | 1.3    |
| 110902 | 'Chrna2'      | 0     | 0     | 0    | 0    | 0    | 0     | 0    | 0     | 0.02  | 0      |
| 110911 | 'Cds2'        | 15.76 | 15.89 | 21.6 | 23.1 | 20.5 | 17.21 | 26   | 15.09 | 17.49 | 15.03  |
| 110920 | 'Hspa13'      | 39.21 | 41.88 | 30.5 | 31.8 | 6.42 | 15.24 | 23.7 | 21.31 | 26.39 | 28.65  |
| 110935 | 'Atp6v1b1'    | 0.44  | 0     | 0    | 0    | 0    | 0     | 0    | 0     | 0     | 0      |
| 110948 | 'Hlcs'        | 2.4   | 5.4   | 4.46 | 3.61 | 0.21 | 3.13  | 4.67 | 0.81  | 2.29  | 8.45   |
| 110954 | 'Rpl10'       | 301.4 | 347.4 | 298  | 369  | 266  | 287   | 299  | 276.1 | 162.7 | 325.36 |
| 110956 | 'D17H6S56E-5' | 0.25  | 0.27  | 2.39 | 0.73 | 0.26 | 0.19  | 3.54 | 2.41  | 0.2   | 0.52   |
| 110957 | 'D1Pas1'      | 0     | 0     | 0.03 | 0    | 0    | 0.07  | 0    | 0.01  | 0     | 0      |
| 110959 | 'Nudt19'      | 50.33 | 64.56 | 72.3 | 68   | 47.9 | 73.29 | 49.6 | 57.52 | 65.64 | 25.51  |
| 110960 | 'Tars'        | 19.16 | 32.31 | 16   | 36.6 | 11.5 | 21.28 | 14.1 | 17.73 | 16.61 | 38.96  |
| 110962 | 'Mbd6'        | 1.96  | 2.69  | 0.71 | 1.16 | 1.86 | 3.44  | 0.02 | 0.24  | 5.15  | 0.98   |
| 111173 | 'Erc1'        | 7.88  | 9.27  | 7.94 | 1.91 | 10   | 2.47  | 8.28 | 5.78  | 7.83  | 6.18   |
| 111174 | 'Taar1'       | 0     | 0     | 0    | 7.06 | 0    | 0     | 0    | 0     | 0     | 0      |
| 111175 | 'Pecr'        | 14.12 | 2.45  | 3    | 11.4 | 15.7 | 13.68 | 0    | 3.13  | 6.25  | 6.25   |
| 111241 | 'Hmga1b'      | 0.07  | 0     | 0    | 0.06 | 0    | 0.02  | 0    | 0.05  | 0.13  | 0.04   |
| 112403 | 'Dxo'         | 32.37 | 19.04 | 12   | 44.2 | 25.1 | 31.68 | 25.8 | 15.31 | 44.39 | 18.52  |
| 112405 | 'Egln1'       | 0.29  | 0     | 4.72 | 2.3  | 5.44 | 1.76  | 6.56 | 2.42  | 0.06  | 1.28   |
| 112406 | 'Egln2'       | 54.48 | 45.48 | 55.5 | 10.3 | 39.4 | 22.4  | 67.2 | 38.97 | 78.11 | 18.68  |
| 112407 | 'Egln3'       | 2.21  | 0     | 2.48 | 0.02 | 0    | 2.37  | 0    | 0.54  | 0     | 0      |

|        |                 |       |       |      |      |      |       |      |       |       |        |
|--------|-----------------|-------|-------|------|------|------|-------|------|-------|-------|--------|
| 112415 | 'Zfp607b'       | 1.4   | 2.25  | 0.4  | 5.97 | 3.72 | 6.47  | 6.44 | 3.33  | 5.97  | 2.75   |
| 112418 | '1700102P08Rik' | 0     | 1.53  | 3.07 | 0    | 0.41 | 0     | 0    | 1.76  | 1.17  | 0.12   |
| 112419 | 'lfit1bl2'      | 0.01  | 0     | 0.03 | 0.05 | 0.03 | 0.03  | 0.16 | 0     | 0.04  | 0      |
| 112422 | 'Zfp979'        | 0.48  | 0     | 0    | 0    | 0    | 0     | 0    | 0     | 0     | 0      |
| 11287  | 'Pzp'           | 0     | 0.12  | 0    | 0    | 0    | 0.03  | 0.01 | 0.02  | 0     | 0      |
| 11298  | 'Aanat'         | 1.77  | 0     | 0    | 0    | 0    | 0     | 0    | 1.42  | 2.97  | 0      |
| 11302  | 'Aatk'          | 7.11  | 16.59 | 26   | 17.5 | 12.2 | 7.54  | 17.2 | 6.15  | 9.77  | 7.67   |
| 11303  | 'Abca1'         | 0.01  | 0.18  | 0    | 1.42 | 0.67 | 0.17  | 0    | 1.4   | 0     | 0      |
| 11304  | 'Abca4'         | 0.01  | 0.17  | 0    | 0    | 0    | 0     | 0    | 0     | 0     | 0      |
| 11305  | 'Abca2'         | 8.81  | 7.02  | 6.91 | 6.46 | 8.94 | 2.72  | 7.05 | 5.15  | 10.23 | 9.73   |
| 11306  | 'Abcb7'         | 0.93  | 0.71  | 4.4  | 5.8  | 0.69 | 1.59  | 0.53 | 0.28  | 1.52  | 7.06   |
| 11307  | 'Abcg1'         | 37.69 | 32.57 | 45.6 | 29.4 | 45.6 | 51.71 | 35.3 | 36.12 | 31.84 | 35.82  |
| 11308  | 'Abi1'          | 39.13 | 38.52 | 34.6 | 26   | 31.6 | 27.75 | 58   | 24.44 | 37.73 | 32.55  |
| 11350  | 'Abl1'          | 2.26  | 1.03  | 2.13 | 0.93 | 1.16 | 0.01  | 1.48 | 0.7   | 1.38  | 1.55   |
| 11352  | 'Abl2'          | 1.09  | 1.47  | 2.53 | 3.68 | 3.08 | 0.24  | 2.58 | 1.86  | 0.62  | 0.71   |
| 11363  | 'Acadl'         | 16.35 | 4.3   | 8.29 | 0.18 | 2.64 | 28.76 | 24   | 2.27  | 13.49 | 2.85   |
| 11364  | 'Acadm'         | 31.44 | 23.13 | 24.2 | 18.5 | 21.1 | 20.84 | 13.9 | 18.07 | 21.74 | 11.89  |
| 11370  | 'Acadvl'        | 47.98 | 66.97 | 55.6 | 43.1 | 67.5 | 51.03 | 39.6 | 74.15 | 65.2  | 35.04  |
| 113868 | 'Acaa1a'        | 71.19 | 77.04 | 71.3 | 51.4 | 79.6 | 121.5 | 89   | 79.07 | 67.36 | 92.71  |
| 11409  | 'Acads'         | 2.67  | 1.21  | 5.76 | 1.9  | 0.16 | 2.84  | 6.29 | 4.58  | 4.03  | 16.02  |
| 114128 | 'Laptm4b'       | 37.69 | 76.41 | 74.2 | 49.8 | 39.9 | 57.63 | 33.8 | 64.56 | 44.22 | 69.19  |
| 114142 | 'Foxp2'         | 0.74  | 0.22  | 1.93 | 0    | 19.5 | 6.1   | 0.22 | 0     | 0.22  | 2.41   |
| 114143 | 'Atp6v0b'       | 703.2 | 608   | 650  | 767  | 723  | 875.1 | 677  | 702.5 | 800.6 | 863.47 |
| 11416  | 'Slc33a1'       | 12.04 | 9.48  | 14.4 | 3.48 | 12.6 | 4.72  | 13.3 | 13.89 | 19.66 | 21.91  |
| 11418  | 'Asic2'         | 10.46 | 26.64 | 33.2 | 18.4 | 14.1 | 12.85 | 20.7 | 9.95  | 27.09 | 14.31  |
| 11419  | 'Asic1'         | 9.31  | 7.09  | 5.86 | 14.1 | 11.7 | 11.28 | 14.8 | 6.85  | 2.91  | 5.68   |
| 11421  | 'Ace'           | 1.68  | 0.62  | 3.81 | 3.15 | 1.03 | 0.79  | 5.62 | 1.63  | 10.48 | 3.21   |
| 114229 | 'Kiss1r'        | 2.44  | 2.46  | 5.8  | 0    | 28.1 | 7.18  | 0.04 | 4.64  | 0.41  | 1.18   |
| 11423  | 'Ache'          | 243.2 | 220.7 | 199  | 48.9 | 309  | 252.5 | 209  | 289.8 | 208.8 | 239.6  |
| 114230 | 'Aipl1'         | 0     | 0     | 0    | 0    | 0    | 0     | 0    | 0     | 0     | 2.06   |
| 114249 | 'Npnt'          | 0     | 0     | 0.01 | 0    | 0    | 0     | 2.74 | 0.01  | 6.95  | 0.92   |
| 114255 | 'Dok4'          | 2.15  | 5.67  | 5.52 | 9.78 | 0    | 3.75  | 5.94 | 13.31 | 5.83  | 0.27   |
| 11426  | 'Macf1'         | 7.07  | 7.21  | 6.76 | 5.01 | 5.34 | 7.42  | 6.4  | 4.92  | 6.2   | 6.85   |
| 11428  | 'Aco1'          | 8.24  | 4.3   | 4.65 | 0.01 | 3.7  | 4.71  | 13.8 | 2.94  | 3.69  | 10.53  |
| 11429  | 'Aco2'          | 123.6 | 186.6 | 295  | 97   | 172  | 215.5 | 165  | 190.9 | 97.12 | 164.33 |
| 11430  | 'Acox1'         | 25.49 | 28.45 | 41.3 | 18.1 | 23.2 | 11.02 | 34.9 | 21.61 | 30.07 | 41.89  |
| 114301 | 'Palmd'         | 16.05 | 3.46  | 0    | 8.58 | 18.9 | 0.46  | 5.12 | 4.35  | 2.25  | 2.46   |
| 114304 | 'Slc28a3'       | 0.14  | 0.18  | 0.13 | 0.3  | 0.19 | 0.11  | 0.09 | 0.05  | 0.14  | 0.08   |
| 11431  | 'Acp1'          | 66.26 | 55.23 | 54.8 | 62.9 | 78   | 103.9 | 53.1 | 72.25 | 77.06 | 67.87  |
| 11432  | 'Acp2'          | 23.93 | 43.06 | 34.9 | 43.5 | 38.1 | 22.39 | 30.4 | 44.45 | 31    | 52.81  |
| 11434  | 'Acr'           | 1.14  | 0.42  | 0.13 | 4.09 | 0.03 | 0.07  | 1.12 | 1.01  | 3.31  | 1.73   |
| 11435  | 'Chrna1'        | 0.29  | 1.41  | 0.95 | 0.76 | 0.89 | 1.13  | 0.53 | 0.35  | 0.63  | 1.21   |
| 11438  | 'Chrna4'        | 1.63  | 0     | 9.81 | 0    | 0.17 | 4.4   | 4.91 | 2.85  | 1.99  | 0.76   |
| 11440  | 'Chrna6'        | 2.36  | 0     | 0    | 0.02 | 0    | 0.02  | 0    | 0     | 0     | 0      |
| 11441  | 'Chrna7'        | 14.37 | 3.45  | 0.81 | 4.2  | 0.45 | 0     | 8.62 | 5.25  | 1.11  | 8.13   |
| 11443  | 'Chrn1'         | 0     | 0     | 0    | 0    | 0.3  | 0     | 0    | 0     | 0     | 0.04   |
| 11444  | 'Chrn2'         | 8.17  | 5.44  | 13.8 | 0.69 | 11.2 | 9.57  | 6.6  | 10.05 | 4.11  | 9.9    |
| 11447  | 'Chrnd'         | 0     | 0     | 0.05 | 0    | 0    | 0     | 0    | 0     | 0     | 0      |
| 114479 | 'Slc5a5'        | 22.1  | 19.58 | 44.5 | 23.1 | 10.7 | 5.46  | 10.9 | 75.42 | 3.33  | 0.01   |
| 11449  | 'Chrng'         | 0     | 0     | 0.52 | 0    | 0    | 0.02  | 0    | 0     | 0     | 0      |
| 114565 | 'Zbtb21'        | 6.5   | 8.13  | 7.76 | 8.19 | 3.73 | 8.98  | 3.6  | 4.09  | 8.29  | 3.81   |
| 114584 | 'Clic1'         | 11.93 | 5.49  | 3.07 | 9.06 | 33.1 | 37.83 | 5.45 | 8.43  | 7.09  | 37.01  |
| 114585 | 'D17H6S53E'     | 12.71 | 8.07  | 8.07 | 7.83 | 27.5 | 10.99 | 6.02 | 8.78  | 13.98 | 18.14  |
| 11459  | 'Acta1'         | 15.27 | 8.32  | 15   | 7.3  | 6.67 | 7.45  | 10.9 | 10.62 | 20.25 | 25.75  |
| 114601 | 'Ehbp111'       | 25.45 | 34.16 | 29.3 | 23.9 | 27.5 | 69.55 | 27.9 | 25.47 | 18.54 | 16.14  |
| 114602 | 'Zmynd10'       | 2.99  | 6.68  | 4.97 | 11.2 | 13.5 | 12.22 | 10.4 | 0     | 4.46  | 5.11   |
| 114604 | 'Prdm15'        | 1.15  | 1.04  | 1.22 | 0    | 0.47 | 0     | 0    | 0     | 1.52  | 2.63   |
| 114606 | 'Tle6'          | 1.66  | 2.01  | 0    | 3.18 | 4.47 | 0.02  | 5.82 | 2.22  | 1.42  | 0.79   |

|        |             |       |       |      |      |      |       |      |       |       |        |
|--------|-------------|-------|-------|------|------|------|-------|------|-------|-------|--------|
| 11461  | 'Actb'      | 1748  | 1508  | 1867 | 1754 | 1960 | 1289  | 1553 | 1709  | 1512  | 1754.8 |
| 114615 | 'Elac1'     | 12.52 | 8.02  | 10.1 | 8.09 | 11.1 | 4.88  | 5.35 | 7.84  | 9.77  | 15.88  |
| 11464  | 'Actc1'     | 4.47  | 0.77  | 13.6 | 2.5  | 2.8  | 3.94  | 6.91 | 1.48  | 4.47  | 3.97   |
| 114641 | 'Rpl31'     | 123   | 132.1 | 130  | 195  | 114  | 157.4 | 117  | 98.41 | 136   | 98.03  |
| 114642 | 'Brdt'      | 2.19  | 0.91  | 0.19 | 7.37 | 2.36 | 1.36  | 0.1  | 1.27  | 1.41  | 1.33   |
| 114643 | 'Oas1c'     | 0     | 3.57  | 3.3  | 0    | 0    | 6.5   | 6.05 | 0     | 0     | 0.25   |
| 114644 | 'Slc13a3'   | 2.25  | 0.12  | 2.3  | 7.89 | 5.59 | 1.2   | 3.23 | 0.06  | 3.36  | 1.8    |
| 11465  | 'Actg1'     | 846.4 | 707.6 | 986  | 543  | 790  | 834.2 | 963  | 741.7 | 761.7 | 748.97 |
| 114652 | 'Ly6g5c'    | 0     | 0     | 0    | 0.72 | 0    | 0     | 0    | 0     | 0.11  | 0.43   |
| 114654 | 'Ly6g6d'    | 3.27  | 0     | 0    | 0    | 0    | 0     | 0    | 0     | 0     | 0      |
| 114663 | 'Impa2'     | 0     | 0.39  | 4.37 | 0    | 0    | 0     | 0    | 1.21  | 0     | 1.25   |
| 114664 | 'Hsd17b11'  | 8.84  | 7.92  | 6.99 | 2.4  | 9.72 | 7.32  | 1.72 | 2.92  | 9.47  | 13.25  |
| 114674 | 'Gtf2ird2'  | 8.77  | 5.31  | 2.48 | 0.02 | 5.5  | 0     | 7.11 | 5.23  | 7.12  | 0.84   |
| 114679 | 'Selenom'   | 266.5 | 188.7 | 350  | 334  | 343  | 399.2 | 235  | 297.9 | 392.3 | 350.21 |
| 11471  | 'Actl7b'    | 0     | 3.43  | 0    | 0    | 0    | 0     | 0    | 0     | 0     | 0      |
| 114713 | 'Rasa2'     | 1.6   | 3.91  | 5.78 | 0    | 1.56 | 3.54  | 6.15 | 3.33  | 5.86  | 2.73   |
| 114714 | 'Rad51c'    | 6.22  | 0     | 1.18 | 0    | 0    | 0.98  | 0    | 0.48  | 4.15  | 2.08   |
| 114715 | 'Spred1'    | 2.91  | 3.13  | 2.46 | 4.04 | 1.15 | 2.59  | 7.03 | 1.4   | 1.48  | 5.65   |
| 114716 | 'Spred2'    | 1.51  | 3.18  | 3.52 | 8.79 | 1.43 | 0.92  | 2.1  | 1.59  | 4.08  | 2.05   |
| 11472  | 'Actn2'     | 3.74  | 2.02  | 0.42 | 1.3  | 1.98 | 0.11  | 0.98 | 0.59  | 4.45  | 0.17   |
| 11474  | 'Actn3'     | 0.92  | 1.17  | 0    | 0    | 0    | 0     | 0    | 0     | 1.07  | 0      |
| 114741 | 'Supt16'    | 21.46 | 15.81 | 31.8 | 33.1 | 13.5 | 23.91 | 21.7 | 25.44 | 36.74 | 33.17  |
| 11475  | 'Acta2'     | 0.14  | 0.07  | 0.04 | 0.4  | 0.02 | 0.02  | 0    | 0.02  | 0.25  | 0      |
| 11477  | 'Acvr1'     | 2.18  | 0.48  | 0.33 | 5.37 | 1.67 | 0.55  | 0    | 2.08  | 3.15  | 4.93   |
| 11479  | 'Acvr1b'    | 7.21  | 8.65  | 11.5 | 0    | 4.46 | 5.97  | 11.5 | 6.39  | 0.22  | 5.6    |
| 11480  | 'Acvr2a'    | 2.47  | 4.11  | 1.17 | 7.2  | 1.04 | 0.85  | 2.73 | 1.45  | 11.85 | 7.35   |
| 11481  | 'Acvr2b'    | 1.96  | 1.39  | 6.01 | 3.35 | 4.53 | 1.52  | 0.13 | 0.71  | 0.26  | 3.34   |
| 11482  | 'Acvrl1'    | 0     | 0.35  | 0    | 0    | 0    | 0     | 0    | 0     | 0     | 0      |
| 11484  | 'Aspa'      | 20.06 | 8.56  | 0.03 | 0    | 7.97 | 7.46  | 0    | 5.93  | 0     | 0      |
| 11486  | 'Ada'       | 3.39  | 0     | 0.03 | 0    | 0.03 | 5.58  | 0    | 0     | 0     | 10.07  |
| 114863 | 'Plpbbp'    | 56.91 | 29.25 | 30.7 | 28.6 | 29.1 | 37.99 | 51.4 | 43.43 | 32.02 | 45.89  |
| 11487  | 'Adam10'    | 9.65  | 13.35 | 7.15 | 12.7 | 14.4 | 7.14  | 5.45 | 6.69  | 7.04  | 9.03   |
| 114871 | 'Psg28'     | 0.02  | 0     | 0    | 0    | 0    | 0.12  | 0.03 | 0     | 0.07  | 0      |
| 114872 | 'Psg29'     | 0.03  | 0.02  | 0.01 | 0.21 | 0.04 | 0.14  | 0.01 | 0.04  | 0.05  | 0.02   |
| 114873 | 'Dscaml1'   | 2.35  | 0.9   | 6.82 | 2.81 | 1.23 | 2.59  | 2.33 | 0.08  | 2.91  | 2.26   |
| 114874 | 'Ddhd1'     | 3.79  | 2.34  | 0.63 | 7.21 | 3.15 | 0.29  | 0.93 | 2.19  | 1.72  | 1.65   |
| 114875 | 'Plcz1'     | 0.02  | 0     | 0    | 0    | 0    | 4.29  | 0    | 1.31  | 0     | 2.25   |
| 11488  | 'Adam11'    | 9.77  | 0.64  | 14.6 | 10.4 | 20.1 | 2.9   | 23.3 | 10.61 | 8     | 1.78   |
| 114886 | 'Cygb'      | 27.2  | 30.87 | 48.5 | 32.9 | 36.2 | 43.95 | 63.3 | 37.28 | 71.54 | 24.72  |
| 11489  | 'Adam12'    | 0     | 1.22  | 0.23 | 1.88 | 0    | 0     | 1.8  | 0.43  | 0     | 0.02   |
| 114893 | 'Dcun1d1'   | 9.41  | 12.37 | 9.33 | 24.4 | 17.8 | 11.87 | 1.97 | 13.21 | 10.17 | 15.82  |
| 114896 | 'Afg3l1'    | 5.66  | 5.37  | 4.9  | 7.27 | 5.21 | 4.47  | 8.35 | 3.06  | 9.85  | 6.85   |
| 11490  | 'Adam15'    | 7.57  | 15.79 | 27.4 | 18.4 | 10.7 | 6.47  | 7.28 | 14.69 | 10.53 | 7.26   |
| 11491  | 'Adam17'    | 0.7   | 3.89  | 0.03 | 0    | 0.21 | 0.13  | 0    | 0.05  | 1.71  | 4.21   |
| 11492  | 'Adam19'    | 0.42  | 0.05  | 2.68 | 0    | 0.69 | 1.65  | 0.45 | 0.27  | 0.45  | 0.62   |
| 11496  | 'Adam22'    | 53.63 | 58.36 | 77   | 9.39 | 36.3 | 28.93 | 68.7 | 28.36 | 33.99 | 29.54  |
| 11498  | 'Adam4'     | 0     | 0     | 0    | 0    | 0    | 0     | 2.22 | 0     | 1.71  | 0      |
| 11499  | 'Adam5'     | 0     | 2.49  | 0    | 0    | 0    | 0.02  | 0    | 1.18  | 0     | 0      |
| 11500  | 'Adam7'     | 0.1   | 0     | 0    | 0    | 0    | 0     | 0    | 0     | 0     | 0.81   |
| 11501  | 'Adam8'     | 0.13  | 4.57  | 2.37 | 2.5  | 0.02 | 1.61  | 0.97 | 1.78  | 3.5   | 2.81   |
| 11502  | 'Adam9'     | 3.03  | 2.16  | 11.4 | 8.76 | 0.94 | 0.01  | 5.02 | 1.53  | 0     | 2.89   |
| 11504  | 'Adamts1'   | 0.4   | 3.74  | 8.49 | 2.83 | 0    | 5.04  | 8.41 | 2.25  | 0.32  | 0      |
| 11512  | 'Adcy6'     | 3.15  | 7.24  | 6.55 | 4.27 | 5.16 | 1.51  | 3.37 | 2.88  | 0.32  | 2.02   |
| 11513  | 'Adcy7'     | 1.94  | 1.16  | 7.82 | 1.45 | 5.94 | 10.73 | 7.47 | 3.41  | 6.04  | 4.39   |
| 11514  | 'Adcy8'     | 1.01  | 1.31  | 1.86 | 0    | 3.8  | 2.14  | 0.03 | 2.48  | 3.87  | 0.96   |
| 11515  | 'Adcy9'     | 1.26  | 1.19  | 1.41 | 2.1  | 2.6  | 2.04  | 4.25 | 0.32  | 0.7   | 1.64   |
| 11516  | 'Adcyap1'   | 51.17 | 174.8 | 86.4 | 90.9 | 3.05 | 22.45 | 82.1 | 20.93 | 42.31 | 78.59  |
| 11517  | 'Adcyap1r1' | 18.47 | 15.12 | 40.4 | 10.7 | 17.4 | 4.47  | 20.7 | 14.73 | 30.68 | 15.33  |



|       |           |       |       |      |      |      |       |      |       |       |        |
|-------|-----------|-------|-------|------|------|------|-------|------|-------|-------|--------|
| 11518 | 'Add1'    | 64.98 | 36.96 | 39.7 | 10   | 54.6 | 36.32 | 37   | 44.63 | 50.11 | 54.23  |
| 11519 | 'Add2'    | 11.93 | 7.36  | 10.2 | 6.04 | 17.7 | 8.95  | 19.6 | 6.73  | 15.31 | 6.87   |
| 11520 | 'Plin2'   | 10.48 | 4.95  | 2.71 | 18.9 | 3.63 | 8.92  | 2.05 | 2.9   | 38.49 | 15.49  |
| 11529 | 'Adh7'    | 0.93  | 5.72  | 0.35 | 0    | 0    | 0     | 0    | 2.41  | 0     | 0      |
| 11532 | 'Adh5'    | 33.15 | 55.74 | 37.4 | 59.5 | 83   | 46.83 | 29.8 | 44.97 | 55.87 | 58.49  |
| 11534 | 'Adk'     | 43.33 | 54.51 | 34.1 | 26.3 | 21.3 | 41.35 | 47.1 | 47.41 | 42.13 | 37.16  |
| 11535 | 'Adm'     | 0     | 0     | 0.07 | 0    | 0    | 0     | 0    | 0     | 0.03  | 1.79   |
| 11536 | 'Gpr182'  | 0     | 0     | 0    | 0    | 5.77 | 0     | 4.44 | 0     | 10.57 | 2.16   |
| 11538 | 'Adnp'    | 5.42  | 6.57  | 13.1 | 21   | 2.37 | 6.04  | 9.37 | 8.17  | 2.4   | 8.62   |
| 11539 | 'Adora1'  | 7.78  | 2.41  | 9.47 | 7.39 | 11.5 | 2.32  | 17.9 | 6.78  | 5.15  | 0.1    |
| 11540 | 'Adora2a' | 3.54  | 0.83  | 0    | 0    | 0.03 | 3.44  | 0    | 0.98  | 1.68  | 0      |
| 11541 | 'Adora2b' | 0     | 2.17  | 0    | 0    | 0    | 0     | 0    | 0     | 0     | 0      |
| 11542 | 'Adora3'  | 0     | 0     | 0    | 0    | 0    | 0.69  | 2.42 | 0     | 0     | 0      |
| 11544 | 'Adprh'   | 113.2 | 145.7 | 154  | 112  | 107  | 153.1 | 86.5 | 138.6 | 166.8 | 116.2  |
| 11545 | 'Parp1'   | 7.14  | 2.59  | 13   | 1.7  | 0.38 | 1.38  | 15.7 | 10.36 | 0.49  | 3.36   |
| 11546 | 'Parp2'   | 20.94 | 19.54 | 7.72 | 22.5 | 19.1 | 37.82 | 1.1  | 28.87 | 16.99 | 20.26  |
| 11548 | 'Adra1b'  | 1.33  | 0     | 3.46 | 2.39 | 4.12 | 0.18  | 0    | 2.72  | 1.8   | 0      |
| 11549 | 'Adra1a'  | 0.12  | 4.35  | 2.31 | 5    | 0.39 | 1.09  | 0.6  | 0.12  | 2.54  | 2.7    |
| 11551 | 'Adra2a'  | 0.01  | 1.57  | 0    | 0    | 0    | 0     | 2.64 | 1.44  | 0.02  | 0      |
| 11552 | 'Adra2b'  | 0     | 0     | 0    | 0    | 0    | 0     | 0    | 0     | 2.12  | 0      |
| 11553 | 'Adra2c'  | 0     | 0     | 0    | 0    | 0    | 1.16  | 0    | 0     | 1.06  | 0.9    |
| 11554 | 'Adrb1'   | 0.72  | 0.02  | 0.02 | 0    | 0.59 | 0     | 0    | 0     | 0     | 0.02   |
| 11555 | 'Adrb2'   | 0     | 0     | 0    | 0    | 3.72 | 5.54  | 0    | 1.16  | 0     | 0      |
| 11556 | 'Adrb3'   | 3.18  | 1.34  | 0    | 0    | 0.02 | 1.81  | 0    | 1.06  | 0.79  | 0      |
| 11564 | 'Adsl'    | 22.59 | 22.46 | 24.9 | 12   | 28.5 | 21.38 | 26.1 | 23    | 29.28 | 26.5   |
| 11565 | 'Adssl1'  | 11.23 | 9.2   | 46.9 | 29.4 | 14   | 15.87 | 8.96 | 12.83 | 30.01 | 6.8    |
| 11566 | 'Adss'    | 32.02 | 21.44 | 26.7 | 15.4 | 32.6 | 12.62 | 36.4 | 19.28 | 18.38 | 38.91  |
| 11567 | 'Avil'    | 0     | 0.28  | 0    | 2.34 | 1.85 | 0     | 0    | 0.12  | 0.23  | 0.08   |
| 11568 | 'Aebp1'   | 0.01  | 0.05  | 2.27 | 0    | 4.42 | 0     | 0    | 0     | 0.06  | 0.36   |
| 11569 | 'Aebp2'   | 0.31  | 1.7   | 1.95 | 1.61 | 0.98 | 0     | 1.28 | 1.23  | 1.35  | 0.24   |
| 11576 | 'Afp'     | 0     | 0     | 0    | 0    | 0    | 2.54  | 0    | 0     | 0     | 0      |
| 11593 | 'Aga'     | 1.99  | 32.67 | 6.88 | 17.2 | 20.1 | 23.86 | 41   | 8.38  | 37.01 | 14.52  |
| 11595 | 'Acan'    | 0     | 0     | 0.13 | 0    | 0    | 0     | 0.06 | 0     | 0     | 0      |
| 11596 | 'Ager'    | 0.25  | 0.26  | 0    | 7.46 | 0    | 0     | 0.04 | 0     | 0     | 0      |
| 11600 | 'Angpt1'  | 0.01  | 8.77  | 1.49 | 0.03 | 6.1  | 2.96  | 6.32 | 0.07  | 2.79  | 0      |
| 11601 | 'Angpt2'  | 0.43  | 0     | 0.79 | 0    | 1.28 | 0     | 0.18 | 0     | 0     | 2.3    |
| 11602 | 'Angpt4'  | 0     | 0     | 0    | 0    | 0    | 0     | 0    | 1.01  | 0     | 0      |
| 11603 | 'Agrn'    | 3.03  | 5.01  | 21.9 | 2.32 | 6.34 | 5.55  | 11   | 4.73  | 11.41 | 5.71   |
| 11604 | 'Agrp'    | 2.4   | 0     | 2    | 0    | 3.2  | 6.7   | 13.7 | 0     | 0     | 0      |
| 11605 | 'Gla'     | 0.89  | 7.63  | 2.72 | 5.15 | 6.18 | 6.39  | 0    | 0.99  | 5.72  | 4.95   |
| 11606 | 'Agt'     | 106.2 | 139.7 | 49.6 | 106  | 45.5 | 66.44 | 72.3 | 69.42 | 82.98 | 12.36  |
| 11607 | 'Agtr1a'  | 4.5   | 0     | 0    | 0.03 | 0    | 8.77  | 0    | 0.02  | 2.93  | 17.72  |
| 11609 | 'Agtr2'   | 0     | 0     | 5.05 | 0    | 0    | 0     | 0    | 0     | 0     | 0      |
| 11610 | 'Agtrap'  | 4.97  | 5.4   | 4.71 | 6.11 | 9.77 | 10.01 | 3.24 | 11.14 | 8.39  | 17.06  |
| 11614 | 'Nr0b1'   | 0     | 0     | 0    | 0    | 0    | 0     | 0    | 0     | 0     | 3.1    |
| 11615 | 'Gm4737'  | 0     | 2.83  | 0.4  | 5.32 | 0    | 0     | 0    | 0.1   | 0.09  | 0.1    |
| 11622 | 'Ahr'     | 0     | 0     | 0    | 0    | 0    | 0     | 0    | 0     | 0     | 0.03   |
| 11629 | 'Aif1'    | 9.21  | 14.75 | 3.97 | 51.7 | 17.1 | 31.61 | 43.9 | 9.28  | 4.64  | 2      |
| 11630 | 'Crybg1'  | 0     | 0     | 0    | 0    | 0    | 0     | 1.28 | 0     | 0     | 0      |
| 11632 | 'Aip'     | 124.9 | 96.12 | 145  | 125  | 129  | 245.1 | 113  | 160   | 130.1 | 175.95 |
| 11634 | 'Aire'    | 0     | 0     | 0    | 0    | 0    | 0     | 0    | 0.31  | 0     | 0      |
| 11636 | 'Ak1'     | 65.62 | 92.42 | 115  | 130  | 138  | 148.2 | 127  | 162.5 | 88.89 | 95.8   |
| 11637 | 'Ak2'     | 34.95 | 31.03 | 28.6 | 69.9 | 29.6 | 56.33 | 20.1 | 30.02 | 28.52 | 43.33  |
| 11639 | 'Ak4'     | 5.85  | 7.48  | 7.99 | 11.1 | 7.21 | 4.16  | 20.3 | 14.96 | 8.84  | 6.39   |
| 11640 | 'Akap1'   | 2.25  | 1.78  | 0.45 | 2.07 | 0.26 | 0.57  | 0.01 | 0.7   | 0.91  | 1.4    |
| 11641 | 'Akap2'   | 4.52  | 5.36  | 5.44 | 3.5  | 3.27 | 2.79  | 3.63 | 5.96  | 7.02  | 4.54   |
| 11642 | 'Akap3'   | 0     | 0     | 0    | 0    | 0    | 0     | 0    | 0.58  | 0     | 0      |
| 11647 | 'Alpl'    | 5.05  | 0     | 0    | 8.72 | 0.41 | 0     | 7.12 | 3.45  | 0     | 1.59   |

|        |                 |       |       |      |      |      |       |      |       |       |         |
|--------|-----------------|-------|-------|------|------|------|-------|------|-------|-------|---------|
| 11651  | 'Akt1'          | 7.82  | 8.72  | 13   | 15.9 | 10.4 | 3.29  | 12   | 8.3   | 10.77 | 7.83    |
| 11652  | 'Akt2'          | 9.03  | 5.78  | 9.43 | 12.3 | 4.53 | 5.83  | 6.44 | 6.18  | 14.49 | 7.22    |
| 11655  | 'Alas1'         | 21.74 | 10.68 | 19.6 | 15.7 | 31.6 | 20.93 | 16.5 | 35.42 | 19.27 | 31.18   |
| 11656  | 'Alas2'         | 0.42  | 0.65  | 0.12 | 0    | 0    | 0     | 0.16 | 0.5   | 0     | 0.24    |
| 11658  | 'Alcam'         | 43.88 | 35.14 | 25   | 7.53 | 38   | 50.39 | 131  | 43.27 | 148.2 | 159.36  |
| 11666  | 'Abcd1'         | 4.35  | 5.73  | 2.21 | 6.85 | 5.28 | 7.35  | 8.9  | 5.02  | 1.16  | 6.19    |
| 11668  | 'Aldh1a1'       | 9.22  | 1.75  | 1.73 | 0.03 | 19.1 | 18.69 | 0    | 5.47  | 2.05  | 5.08    |
| 11669  | 'Aldh2'         | 15.23 | 25.71 | 38.5 | 15.2 | 17.9 | 43.29 | 24.6 | 24.67 | 14.64 | 12      |
| 116701 | 'Fgfr11'        | 0.18  | 0     | 6.6  | 0.02 | 1.36 | 7.61  | 0    | 3.59  | 0     | 0.02    |
| 11671  | 'Aldh3a2'       | 26.65 | 6.6   | 19.2 | 18.6 | 5.87 | 10.13 | 23.1 | 19.94 | 26.96 | 31.61   |
| 116731 | 'Pcdha1'        | 0     | 0     | 4.45 | 0    | 0    | 0     | 0    | 0     | 0     | 0.11    |
| 116732 | 'Tsga13'        | 0     | 0     | 0    | 0    | 0    | 0.46  | 0    | 0.9   | 0     | 0       |
| 116733 | 'Vps4a'         | 78    | 67.24 | 62.5 | 44.3 | 53   | 76.62 | 78.2 | 80.76 | 67.18 | 107.39  |
| 11674  | 'Aldoa'         | 2058  | 1786  | 2303 | 1734 | 2201 | 2624  | 2229 | 2545  | 2241  | 2144.97 |
| 116748 | 'Lsm10'         | 43.05 | 33.65 | 11.5 | 39.8 | 52.9 | 25.46 | 21   | 46.88 | 31.55 | 44.99   |
| 11676  | 'Aldoc'         | 196.9 | 241   | 294  | 215  | 69.9 | 310.7 | 381  | 348.5 | 265.2 | 177.15  |
| 11677  | 'Akr1b3'        | 89.6  | 51.55 | 87.4 | 66.9 | 81.9 | 125.2 | 88   | 67.63 | 106.8 | 49.83   |
| 11682  | 'Alk'           | 0.01  | 0.87  | 0.27 | 0    | 0    | 0     | 1.87 | 0     | 2.07  | 0.18    |
| 116837 | 'Rims1'         | 1.74  | 0.64  | 1.88 | 0.61 | 3.54 | 2.21  | 2.11 | 5.22  | 1.48  | 3.15    |
| 116838 | 'Rims2'         | 17.97 | 10.36 | 14.4 | 2.77 | 15.7 | 12.08 | 7.28 | 12.86 | 10.31 | 7.91    |
| 116847 | 'Prelp'         | 1.17  | 2.13  | 0    | 0    | 1.93 | 0     | 2.09 | 1.1   | 3.59  | 0       |
| 116848 | 'Baz2a'         | 0.67  | 5.13  | 2.97 | 2.29 | 3.96 | 1.46  | 1.55 | 2.09  | 0.73  | 2.98    |
| 11686  | 'Alox12b'       | 0     | 0     | 0.02 | 0    | 0    | 0.02  | 13.1 | 0     | 0     | 0       |
| 11687  | 'Alox15'        | 0     | 0     | 1.27 | 0.2  | 0    | 1.75  | 0.03 | 0.28  | 0     | 0       |
| 116870 | 'Mta1'          | 9.67  | 1.3   | 8.86 | 7.07 | 10.3 | 2.9   | 2.82 | 2.98  | 4.02  | 2.94    |
| 116871 | 'Mta3'          | 8.97  | 25.82 | 30   | 5.56 | 14.6 | 7.96  | 24.7 | 17.42 | 3.25  | 16.69   |
| 116872 | 'Serpib7'       | 0     | 0     | 0    | 0    | 0    | 0     | 0    | 1.83  | 0     | 0       |
| 116873 | 'Stim2'         | 6.67  | 5.99  | 5.01 | 6.83 | 0.91 | 6.16  | 7.03 | 3.19  | 3.59  | 6.13    |
| 11688  | 'Alox8'         | 0.59  | 0.91  | 3.76 | 2.19 | 3.13 | 1.67  | 0.71 | 0.29  | 1.14  | 2.5     |
| 116891 | 'Derl2'         | 15.38 | 5.4   | 4.51 | 7.96 | 8.29 | 6.97  | 11   | 9.41  | 9.68  | 12.73   |
| 11690  | 'Alox5ap'       | 9.47  | 5.2   | 5.3  | 68.3 | 11.2 | 18.93 | 0    | 0.29  | 8.27  | 9.4     |
| 116904 | 'Alpk3'         | 0.01  | 0     | 0.02 | 0    | 0.02 | 0.02  | 0    | 0.25  | 0.01  | 0       |
| 116905 | 'Dph1'          | 16.65 | 24.19 | 18.2 | 0    | 14.6 | 13.28 | 9.07 | 10    | 25.42 | 9.78    |
| 116914 | 'Slc19a2'       | 6.24  | 2.1   | 0.44 | 5.07 | 3.72 | 2.42  | 12.1 | 1.6   | 4.32  | 3.32    |
| 11692  | 'Gfer'          | 18.94 | 15.49 | 23.1 | 18   | 22.3 | 11.26 | 8.01 | 8.72  | 12.85 | 16.31   |
| 116939 | 'Pnpla3'        | 0.81  | 3.05  | 1.91 | 0.44 | 1.67 | 0     | 4.26 | 2.99  | 0.74  | 0.12    |
| 116940 | 'Tgs1'          | 15.42 | 15.77 | 8.29 | 8.3  | 5.8  | 6.83  | 16.1 | 4.57  | 10.62 | 8.79    |
| 11695  | 'Alx4'          | 0     | 0.05  | 0    | 0    | 0    | 0     | 0    | 0     | 0     | 0       |
| 116972 | 'Fam57a'        | 4.44  | 11.32 | 12.9 | 1.27 | 4.84 | 24.2  | 1.01 | 12.38 | 5.6   | 12.06   |
| 11702  | 'Amd1'          | 34.56 | 28.43 | 28.8 | 28.5 | 39.8 | 18.08 | 43.4 | 55.65 | 36.78 | 26.22   |
| 11704  | 'Amelx'         | 0     | 0     | 0    | 0    | 0    | 0     | 0    | 0     | 0     | 0.82    |
| 11705  | 'Amh'           | 0     | 0     | 0    | 0    | 0    | 0     | 0    | 0.85  | 0     | 0.23    |
| 117109 | 'Pop5'          | 113.2 | 94.12 | 53.7 | 129  | 65   | 61.77 | 43.1 | 82.29 | 59.27 | 76.63   |
| 117146 | 'Ube3b'         | 0.73  | 6.58  | 8.35 | 4.8  | 9.4  | 3.15  | 6.27 | 4.39  | 0.01  | 5.79    |
| 117147 | 'Acsm1'         | 0     | 0     | 0    | 0    | 0    | 0     | 0    | 0.04  | 0     | 0       |
| 117148 | 'Necab2'        | 27.49 | 23.52 | 13.7 | 23.4 | 107  | 24.2  | 2.54 | 17.98 | 6.22  | 22.01   |
| 117149 | 'Tirap'         | 1.29  | 1.38  | 1.46 | 0.4  | 0.29 | 0.99  | 0.13 | 0.1   | 1.7   | 1.34    |
| 117150 | 'Pip4k2c'       | 12.71 | 10.44 | 17.4 | 0    | 10.8 | 6.75  | 15.2 | 18.26 | 15.27 | 7.54    |
| 117160 | 'Ttyh2'         | 8.12  | 15.78 | 9.63 | 9.47 | 15.4 | 17.38 | 1.17 | 1.05  | 7.72  | 3.22    |
| 11717  | 'Ampd3'         | 6.67  | 5.36  | 16.3 | 0.25 | 4.26 | 0.02  | 7.02 | 10.6  | 11.1  | 2.5     |
| 117171 | '1110038F14Rik' | 39.94 | 53.21 | 22.8 | 18.2 | 40.3 | 26.69 | 38.5 | 38.32 | 30.32 | 50.12   |
| 117197 | 'Bloc1s4'       | 2.41  | 6.49  | 3.08 | 26.8 | 6.61 | 6.76  | 1.72 | 3.38  | 6.14  | 3.1     |
| 117198 | 'lvns1abp'      | 53.1  | 47.11 | 36.4 | 22.4 | 42.1 | 23.33 | 43.2 | 41.86 | 37.69 | 41.36   |
| 11722  | 'Amy1'          | 6.95  | 10.89 | 22.4 | 32   | 6.72 | 7.43  | 16.3 | 19.18 | 33.57 | 16.58   |
| 117229 | 'Stk33'         | 11.8  | 18.1  | 6.03 | 10.8 | 0    | 0.02  | 19.2 | 2.83  | 0     | 9.73    |
| 11727  | 'Ang'           | 2.57  | 3.9   | 5.96 | 0    | 0    | 8.27  | 0.36 | 1.09  | 6.25  | 2.82    |
| 11732  | 'Ank'           | 10.16 | 7.92  | 15.4 | 19.4 | 11.5 | 16.45 | 7.48 | 3.67  | 3.67  | 2.37    |
| 11733  | 'Ank1'          | 1.83  | 5.45  | 1.54 | 2.62 | 1.71 | 0.35  | 0.99 | 1.4   | 0.59  | 1.09    |

|        |           |       |       |      |      |      |       |      |       |       |         |
|--------|-----------|-------|-------|------|------|------|-------|------|-------|-------|---------|
| 11735  | 'Ank3'    | 8.08  | 7.78  | 6.7  | 10.9 | 8.19 | 6.65  | 3.92 | 6.41  | 8.25  | 5.74    |
| 11736  | 'Ankfy1'  | 3.99  | 3.91  | 8.44 | 6.88 | 0.61 | 1.33  | 1.36 | 2.81  | 2.84  | 4.83    |
| 11737  | 'Anp32a'  | 26.01 | 21.27 | 18.3 | 17.8 | 35.6 | 38.62 | 23.6 | 26.75 | 39.52 | 26.38   |
| 11739  | 'Slc25a4' | 1168  | 989.1 | 1204 | 1016 | 1078 | 1215  | 1024 | 1441  | 1029  | 1208.21 |
| 11740  | 'Slc25a5' | 248.7 | 164.3 | 380  | 236  | 270  | 393.7 | 275  | 288.1 | 238.2 | 157.91  |
| 11744  | 'Anxa11'  | 0.66  | 0     | 0    | 1.61 | 1.99 | 0.25  | 2.89 | 0     | 1.91  | 6.04    |
| 11745  | 'Anxa3'   | 0     | 0     | 0    | 11.5 | 0.12 | 8.38  | 3.77 | 5.45  | 0     | 0       |
| 11746  | 'Anxa4'   | 0     | 0     | 0    | 0    | 0    | 0     | 0.93 | 0     | 0     | 0.6     |
| 11747  | 'Anxa5'   | 68.56 | 36.67 | 72.6 | 173  | 115  | 123   | 25.8 | 50.89 | 120.5 | 117.87  |
| 11749  | 'Anxa6'   | 76.68 | 71.59 | 51.1 | 66.2 | 45.1 | 47.55 | 33.8 | 55.99 | 27.1  | 43.96   |
| 11750  | 'Anxa7'   | 26.39 | 45.48 | 21.2 | 24.5 | 14.6 | 31.91 | 30.3 | 37.07 | 47.29 | 30.66   |
| 11757  | 'Prdx3'   | 77.94 | 89.67 | 95.8 | 62.5 | 91.2 | 67.38 | 118  | 103.3 | 73.84 | 55.07   |
| 11758  | 'Prdx6'   | 102.1 | 85.68 | 56.5 | 96.1 | 118  | 84.74 | 86.8 | 63.97 | 49    | 51.24   |
| 117589 | 'Asb7'    | 1.49  | 0.38  | 0.62 | 6.96 | 1.36 | 1.32  | 1.28 | 3.91  | 0.05  | 3.64    |
| 117590 | 'Asb10'   | 0     | 0     | 0.02 | 0    | 0.02 | 0.04  | 0    | 0     | 0.02  | 0.02    |
| 117591 | 'Slc2a9'  | 0     | 0.06  | 0    | 0    | 0    | 0     | 0    | 0     | 0     | 0       |
| 117592 | 'B3galt6' | 17.08 | 19.66 | 16.3 | 4.57 | 13.1 | 16.02 | 25.8 | 4.98  | 32.17 | 4.27    |
| 117599 | 'Helb'    | 0     | 0.03  | 0.13 | 0.02 | 0.98 | 0.01  | 0    | 0.06  | 0.06  | 0.02    |
| 117600 | 'Srgap1'  | 1.21  | 2.38  | 1    | 1.5  | 2.27 | 2.77  | 0.5  | 0.57  | 1.07  | 1.34    |
| 117606 | 'Boc'     | 3.13  | 0.42  | 0.04 | 0    | 0.62 | 2.83  | 0.4  | 0     | 0     | 0.74    |
| 11761  | 'Aox1'    | 0.6   | 0     | 0    | 0    | 0    | 0     | 0    | 0     | 0.01  | 0       |
| 11764  | 'Ap1b1'   | 56.18 | 50.53 | 86   | 18.6 | 50.3 | 29.04 | 73   | 71.89 | 39.71 | 68.04   |
| 11765  | 'Ap1g1'   | 5.98  | 1.94  | 4.63 | 1.92 | 7.5  | 3.07  | 10.3 | 2.85  | 6.28  | 6.96    |
| 11766  | 'Ap1g2'   | 0.32  | 0.38  | 2.97 | 0    | 0.02 | 5.46  | 1.85 | 5.32  | 0     | 1.65    |
| 11767  | 'Ap1m1'   | 93.54 | 90.48 | 122  | 46.1 | 40.9 | 105   | 101  | 76.71 | 95.44 | 137.04  |
| 11768  | 'Ap1m2'   | 0     | 0     | 0    | 0    | 0.23 | 0.04  | 0    | 0     | 0     | 0       |
| 11769  | 'Ap1s1'   | 181.4 | 231.7 | 180  | 203  | 215  | 196.6 | 158  | 228.9 | 264.9 | 189.62  |
| 11770  | 'Fabp4'   | 0     | 0     | 0.08 | 0    | 10.3 | 0.08  | 0.17 | 0     | 0.07  | 0.23    |
| 11771  | 'Ap2a1'   | 29.5  | 30.1  | 68.6 | 19.3 | 36.9 | 13.4  | 49.5 | 36.21 | 42.39 | 42.05   |
| 11772  | 'Ap2a2'   | 57.79 | 46.56 | 63.6 | 45.4 | 41.1 | 14.79 | 79   | 33.84 | 60.34 | 51.31   |
| 11773  | 'Ap2m1'   | 499.3 | 428.6 | 459  | 443  | 588  | 689.6 | 557  | 581.5 | 556.4 | 573.69  |
| 11774  | 'Ap3b1'   | 11.12 | 15.72 | 5.42 | 5.63 | 6.89 | 11.74 | 27.4 | 11.78 | 14.26 | 19.98   |
| 11775  | 'Ap3b2'   | 65.07 | 52.7  | 70   | 44.7 | 46.8 | 25.99 | 22.2 | 44.98 | 35.34 | 57.7    |
| 11776  | 'Ap3d1'   | 33.98 | 43.88 | 61.9 | 30.3 | 36.5 | 30.06 | 60.4 | 28.41 | 44.65 | 42.83   |
| 11777  | 'Ap3s1'   | 11.46 | 20.11 | 24.1 | 16.6 | 16.4 | 26.29 | 15.8 | 14.87 | 38.69 | 10.75   |
| 11778  | 'Ap3s2'   | 12.79 | 16.24 | 6.2  | 6.29 | 11.7 | 8.97  | 6.99 | 12.24 | 11.29 | 8.98    |
| 11781  | 'Ap4m1'   | 1.84  | 3.05  | 7.23 | 2.64 | 13.4 | 8.51  | 11.7 | 4.16  | 8.33  | 7.23    |
| 11782  | 'Ap4s1'   | 84.95 | 65.2  | 76.8 | 68   | 53.8 | 64.95 | 73.4 | 69.9  | 105.9 | 41.85   |
| 11783  | 'Apaf1'   | 0.77  | 0.87  | 0.31 | 0.02 | 1.27 | 0.43  | 0.01 | 0.59  | 0.1   | 0.39    |
| 11784  | 'Apba2'   | 41.76 | 44.91 | 87   | 26.3 | 46   | 43.38 | 27.3 | 83.19 | 41.53 | 31.44   |
| 11785  | 'Apbb1'   | 229.2 | 250.2 | 258  | 200  | 300  | 226.4 | 202  | 280.1 | 299.5 | 329.76  |
| 11787  | 'Apbb2'   | 10.34 | 11.4  | 10   | 15.5 | 13.7 | 6.95  | 12.9 | 3.17  | 13.89 | 10.49   |
| 11789  | 'Apc'     | 7.64  | 4.9   | 10.1 | 5.2  | 5.17 | 5.31  | 6.82 | 6.96  | 8.93  | 15.66   |
| 11790  | 'Speg'    | 3.73  | 9.73  | 2.55 | 2.16 | 11.6 | 8.97  | 2.57 | 6.66  | 0.27  | 0.73    |
| 11792  | 'Apex1'   | 122.4 | 93.93 | 80   | 144  | 105  | 138.9 | 112  | 142.5 | 101.7 | 113.21  |
| 11793  | 'Atg5'    | 22.63 | 32.66 | 12   | 38.6 | 21.1 | 37.1  | 20.9 | 29.21 | 32.81 | 27.84   |
| 11796  | 'Birc3'   | 0     | 0     | 3.03 | 0    | 2.16 | 0     | 0    | 0     | 0     | 0.93    |
| 11797  | 'Birc2'   | 19.18 | 9.5   | 6.6  | 24   | 10.4 | 7.09  | 23.6 | 24.87 | 14.13 | 15.39   |
| 11798  | 'Xiap'    | 1.7   | 2.81  | 0.82 | 2.28 | 3.98 | 1.5   | 3.9  | 0.82  | 1.89  | 1.16    |
| 11799  | 'Birc5'   | 2.52  | 0.35  | 0.26 | 0.27 | 0.21 | 0.14  | 0.06 | 0.09  | 3.2   | 4.8     |
| 11800  | 'Api5'    | 25.8  | 26.04 | 33.2 | 11.7 | 27.7 | 11.34 | 48.4 | 33.55 | 21.75 | 42.42   |
| 11801  | 'Cd5l'    | 0.02  | 0     | 0    | 0    | 0    | 0     | 0    | 0     | 0     | 0       |
| 11803  | 'Aplp1'   | 176.1 | 190.1 | 139  | 203  | 153  | 194.6 | 177  | 193.6 | 211   | 125.18  |
| 11804  | 'Aplp2'   | 140.2 | 96.82 | 222  | 83.9 | 130  | 99.22 | 240  | 157.3 | 175.6 | 130.26  |
| 11806  | 'Apoa1'   | 2.83  | 0.81  | 1.62 | 7.74 | 0.98 | 7.56  | 2.73 | 4.6   | 0.59  | 0       |
| 11807  | 'Apoa2'   | 13.59 | 9.58  | 6.87 | 20.8 | 5.01 | 0     | 17.2 | 13.82 | 9.47  | 22.33   |
| 11808  | 'Apoa4'   | 0     | 0.67  | 0    | 0    | 0    | 0     | 0    | 0     | 0     | 0       |
| 11810  | 'Apobec1' | 0     | 0     | 0    | 0    | 0    | 0     | 0    | 2.63  | 3.76  | 7.61    |

|        |           |       |       |      |      |      |       |      |       |       |        |
|--------|-----------|-------|-------|------|------|------|-------|------|-------|-------|--------|
| 11811  | 'Apobec2' | 0.11  | 2.62  | 0.12 | 0    | 0    | 0.08  | 0.04 | 0     | 0.11  | 5.81   |
| 11812  | 'Apoc1'   | 6.01  | 9.34  | 8.6  | 18.6 | 0    | 10.32 | 0    | 2.02  | 0     | 2.28   |
| 11814  | 'Apoc3'   | 45.45 | 83.22 | 18.9 | 143  | 0    | 6.97  | 14.1 | 21.49 | 26.77 | 0      |
| 11815  | 'Apod'    | 15.9  | 26.54 | 0.87 | 3.56 | 45.3 | 24.53 | 0.03 | 1.26  | 4.18  | 1.81   |
| 11816  | 'Apoe'    | 1568  | 1109  | 1006 | 1351 | 826  | 1371  | 1178 | 785.4 | 758.3 | 528.18 |
| 11818  | 'Apoh'    | 0     | 0.25  | 3.24 | 0    | 0    | 7.01  | 0    | 0     | 0     | 0      |
| 11819  | 'Nr2f2'   | 0.64  | 17.57 | 7.1  | 6.68 | 0.02 | 0.29  | 20.3 | 14.83 | 1.29  | 0      |
| 11820  | 'App'     | 155.3 | 215.5 | 154  | 246  | 133  | 103.9 | 218  | 198.7 | 153.9 | 101.49 |
| 11821  | 'Aprt'    | 63.6  | 96.71 | 102  | 114  | 60.9 | 99.25 | 73.7 | 88    | 108.6 | 90.15  |
| 11826  | 'Aqp1'    | 0     | 0     | 0    | 4.87 | 0.6  | 0     | 0    | 0     | 0     | 0.02   |
| 11829  | 'Aqp4'    | 5.5   | 6.92  | 1.18 | 22.5 | 5.33 | 8.65  | 0    | 2.81  | 7.17  | 2.76   |
| 11830  | 'Aqp5'    | 0     | 0     | 2.41 | 0.04 | 0    | 0     | 0    | 0     | 0     | 0      |
| 11831  | 'Aqp6'    | 0     | 0.57  | 0    | 0    | 0    | 1.86  | 0    | 0     | 0     | 0      |
| 11832  | 'Aqp7'    | 0.09  | 0.22  | 0.67 | 3.75 | 0.48 | 0.25  | 0.3  | 0.93  | 0.19  | 0.2    |
| 11834  | 'Aqr'     | 14.89 | 6.77  | 8.36 | 8.53 | 6.59 | 9.52  | 3.88 | 5.75  | 11.15 | 5.28   |
| 11835  | 'Ar'      | 10.68 | 14.58 | 6.39 | 10.8 | 2.31 | 3.12  | 6.14 | 17.52 | 1.91  | 8.87   |
| 11836  | 'Araf'    | 565.9 | 513.4 | 476  | 498  | 437  | 581.5 | 460  | 566.2 | 549   | 507.72 |
| 11837  | 'Rplp0'   | 191   | 233.2 | 160  | 230  | 163  | 191.5 | 199  | 188.6 | 225.2 | 197.41 |
| 11838  | 'Arc'     | 7.11  | 39.28 | 41.5 | 37.1 | 4.26 | 22.38 | 16.2 | 20.1  | 2.38  | 52.74  |
| 11840  | 'Arf1'    | 531.3 | 553.6 | 467  | 410  | 536  | 599.5 | 545  | 555.7 | 456.1 | 600.62 |
| 11841  | 'Arf2'    | 34.86 | 25.9  | 46.2 | 63.5 | 47.1 | 23.37 | 26.7 | 50.68 | 52.45 | 71.3   |
| 11842  | 'Arf3'    | 44.88 | 38.43 | 31.7 | 47.3 | 52.9 | 37.08 | 38.4 | 55.47 | 53.41 | 35.2   |
| 11843  | 'Arf4'    | 110.4 | 117.3 | 118  | 123  | 79.3 | 108.5 | 110  | 102.9 | 115.8 | 91.66  |
| 11844  | 'Arf5'    | 35.16 | 36.76 | 69.6 | 60   | 55.3 | 40.75 | 37.3 | 26.51 | 51.73 | 29.13  |
| 118445 | 'Klf16'   | 0.59  | 1.98  | 2.38 | 16.8 | 6.51 | 0.51  | 2.42 | 3.26  | 5.52  | 5.41   |
| 118446 | 'Gjc3'    | 4.53  | 3.28  | 19.1 | 8.21 | 10.2 | 3.09  | 11.1 | 3.08  | 3.46  | 2.92   |
| 118449 | 'Synpo2'  | 0.02  | 0.26  | 0.05 | 0    | 0.23 | 0.03  | 0    | 0.74  | 2.09  | 1.09   |
| 11845  | 'Arf6'    | 3.05  | 4.38  | 5.12 | 2.06 | 5.66 | 2.91  | 3.24 | 1.59  | 2.76  | 4.9    |
| 118451 | 'Mrps2'   | 9.18  | 24.8  | 24.8 | 27.6 | 24.4 | 14.76 | 19   | 20.83 | 9.18  | 17.36  |
| 118452 | 'Baalc'   | 11.13 | 4.88  | 5.73 | 0.72 | 3.82 | 14.9  | 14   | 17.9  | 13.54 | 5.37   |
| 118453 | 'Mmp28'   | 0     | 0     | 0    | 0    | 1.13 | 0     | 0    | 0     | 0     | 0      |
| 118454 | 'Gjc2'    | 0.28  | 0     | 0    | 0.03 | 3.37 | 7.47  | 0.02 | 0.26  | 0     | 0      |
| 11846  | 'Arg1'    | 0     | 0     | 3.07 | 0    | 30   | 0     | 0    | 0     | 0.91  | 0.7    |
| 11847  | 'Arg2'    | 5.83  | 10.05 | 12.7 | 0.25 | 4.21 | 7.8   | 12.2 | 6.41  | 0     | 0.37   |
| 11848  | 'Rhoa'    | 94.6  | 79.92 | 48   | 64.9 | 89.2 | 82.58 | 83   | 42.71 | 64.41 | 51     |
| 11852  | 'RhoB'    | 12.86 | 18.32 | 15   | 28.5 | 9.93 | 10.55 | 19.1 | 16.18 | 14.83 | 6.6    |
| 11853  | 'RhoC'    | 16.68 | 4.51  | 41.6 | 16.5 | 0    | 13.9  | 13.2 | 5.75  | 19.58 | 8.07   |
| 11855  | 'Arhgap5' | 5.67  | 4     | 6.99 | 4.76 | 6.27 | 6.7   | 0.42 | 4.41  | 2.71  | 6.64   |
| 11856  | 'Arhgap6' | 8.44  | 3.52  | 0    | 0    | 7.16 | 11.64 | 2.46 | 7.79  | 5.81  | 6.35   |
| 11857  | 'Arhgdib' | 2.06  | 0.05  | 4.05 | 18.3 | 7.41 | 42.25 | 0    | 13.22 | 7.53  | 0      |
| 11858  | 'Rnd2'    | 19.65 | 57.5  | 41.4 | 49.9 | 55.5 | 46.56 | 40.4 | 36.78 | 50.31 | 23.77  |
| 11861  | 'Arl4a'   | 6.41  | 12.05 | 7.36 | 32.4 | 2.41 | 3.65  | 25.2 | 5.02  | 18.33 | 10.46  |
| 11863  | 'Arnt'    | 2.32  | 5.11  | 5.43 | 1.02 | 8.23 | 1.39  | 2.86 | 4.56  | 1.97  | 1.93   |
| 11864  | 'Arnt2'   | 5.55  | 3.56  | 4.11 | 3.4  | 2.46 | 5.75  | 18.1 | 4.55  | 7.16  | 1.01   |
| 11865  | 'Arntl'   | 7.58  | 21.76 | 8.83 | 4.08 | 9.76 | 4.11  | 3.42 | 7.62  | 5.8   | 5.47   |
| 11867  | 'Arpc1b'  | 7.51  | 8.55  | 0.13 | 9.3  | 9.82 | 35.18 | 9.04 | 10.96 | 36.62 | 64.34  |
| 11870  | 'Art1'    | 0.06  | 1.17  | 0.17 | 0.04 | 0    | 0     | 0.14 | 0     | 4.53  | 0.09   |
| 11875  | 'Art5'    | 0     | 0     | 0.09 | 0    | 0    | 0.04  | 2.72 | 0     | 0     | 0      |
| 11876  | 'Artn'    | 2.48  | 1.94  | 0    | 0    | 0    | 1.73  | 2.68 | 2.85  | 1.78  | 0.68   |
| 11877  | 'Arvcf'   | 2     | 8.8   | 8.55 | 10.5 | 8.28 | 7.83  | 10.1 | 4.14  | 6.99  | 3      |
| 11878  | 'Arx'     | 0     | 1.16  | 1.51 | 0    | 6.7  | 0.26  | 3.29 | 0     | 0     | 0.28   |
| 11881  | 'Arsb'    | 20.58 | 23.6  | 22.5 | 5.66 | 12.2 | 1.01  | 13.4 | 26.4  | 13.29 | 24.39  |
| 11883  | 'Arsa'    | 26.97 | 28.18 | 27.9 | 25.9 | 30.9 | 19.12 | 34.5 | 25.79 | 48.56 | 34.38  |
| 11886  | 'Asah1'   | 62.66 | 49.92 | 61.2 | 53.9 | 27.8 | 37.07 | 30.6 | 51.75 | 41.59 | 54.24  |
| 11889  | 'Asgr1'   | 1.28  | 1.44  | 0.05 | 4.73 | 0    | 0     | 0.85 | 0.27  | 0.77  | 1.73   |
| 11891  | 'Rab27a'  | 5.96  | 6.7   | 3.86 | 9.9  | 6.99 | 10.04 | 0.18 | 3.07  | 0.63  | 4.17   |
| 11898  | 'Ass1'    | 275.1 | 213   | 194  | 123  | 303  | 324   | 250  | 193.6 | 289.1 | 304.82 |
| 11899  | 'Astn1'   | 19.91 | 13.41 | 36.1 | 21.6 | 10.1 | 2.84  | 22.3 | 9.46  | 15.91 | 20.2   |

|       |            |       |       |      |      |      |       |      |       |       |         |
|-------|------------|-------|-------|------|------|------|-------|------|-------|-------|---------|
| 11905 | 'Serpinc1' | 0     | 0     | 0.27 | 0    | 0    | 0     | 0    | 0     | 0     | 0       |
| 11906 | 'Zfxh3'    | 1.08  | 2.14  | 2.77 | 2.01 | 1.78 | 0.92  | 3.53 | 1.77  | 2.86  | 1.29    |
| 11907 | 'Ate1'     | 92.79 | 85.4  | 86.4 | 61.6 | 91.4 | 90.05 | 98.3 | 53.24 | 80.06 | 79.3    |
| 11908 | 'Atf1'     | 2.75  | 4.87  | 1.11 | 7.27 | 0.02 | 0     | 3.02 | 4.42  | 8.62  | 1.24    |
| 11909 | 'Atf2'     | 39.59 | 26.6  | 41.7 | 30.9 | 36.4 | 10.82 | 34.7 | 28.84 | 42.4  | 51.93   |
| 11910 | 'Atf3'     | 0     | 16.92 | 5.61 | 63.9 | 0.02 | 86.51 | 4.97 | 0     | 0.02  | 0       |
| 11911 | 'Atf4'     | 61.7  | 55.88 | 120  | 123  | 53.6 | 24.62 | 46.6 | 66.1  | 45.22 | 44.8    |
| 11920 | 'Atm'      | 0.75  | 0.71  | 0.77 | 4.69 | 1.8  | 0.09  | 3.2  | 0.04  | 0.39  | 0.05    |
| 11927 | 'Atox1'    | 202.4 | 167.1 | 177  | 220  | 156  | 272.2 | 189  | 147.7 | 215.9 | 210.42  |
| 11928 | 'Atp1a1'   | 56.22 | 33.46 | 31.8 | 55.4 | 33.8 | 21.64 | 40.6 | 33    | 51.9  | 36.98   |
| 11931 | 'Atp1b1'   | 822.5 | 683.2 | 804  | 487  | 725  | 711.4 | 683  | 642.2 | 749.4 | 463.28  |
| 11932 | 'Atp1b2'   | 170.1 | 109.3 | 115  | 61.6 | 105  | 133.2 | 195  | 165.3 | 206.9 | 138.47  |
| 11933 | 'Atp1b3'   | 123.3 | 161.2 | 87   | 145  | 90.9 | 179.1 | 140  | 117.5 | 116.3 | 169.18  |
| 11936 | 'Fxyd2'    | 13.17 | 57.6  | 10.1 | 42   | 15   | 16.15 | 25.2 | 7.27  | 8.68  | 10.79   |
| 11937 | 'Atp2a1'   | 0     | 0     | 0    | 0.41 | 0    | 0     | 0    | 0     | 0.65  | 0       |
| 11938 | 'Atp2a2'   | 18.3  | 11.41 | 18.4 | 16.5 | 17.6 | 9.29  | 18.7 | 13.16 | 9.84  | 13.34   |
| 11941 | 'Atp2b2'   | 17.48 | 12.73 | 18.2 | 11.8 | 27.6 | 7.02  | 19.8 | 10.36 | 17.78 | 15.51   |
| 11944 | 'Atp4a'    | 0.03  | 0     | 1.18 | 0    | 0    | 3.76  | 0    | 1.73  | 0     | 1.91    |
| 11945 | 'Atp4b'    | 0     | 0     | 1.22 | 0    | 0    | 0     | 0    | 0.4   | 0     | 0       |
| 11946 | 'Atp5a1'   | 409.5 | 358.1 | 625  | 416  | 444  | 404.5 | 436  | 421   | 355.3 | 382.03  |
| 11947 | 'Atp5b'    | 941.9 | 906.6 | 1516 | 687  | 990  | 1184  | 1178 | 1002  | 921.4 | 998.33  |
| 11949 | 'Atp5c1'   | 437.8 | 431.2 | 496  | 307  | 476  | 516.5 | 537  | 509.2 | 399.6 | 422.46  |
| 11950 | 'Atp5f1'   | 256.8 | 239.2 | 295  | 262  | 255  | 332.9 | 285  | 327.6 | 301.7 | 297.19  |
| 11951 | 'Atp5g1'   | 652.4 | 589.9 | 727  | 813  | 741  | 694   | 554  | 742.2 | 580.5 | 538.46  |
| 11957 | 'Atp5j'    | 760.9 | 632.1 | 836  | 791  | 705  | 920.3 | 756  | 569.4 | 672.5 | 679.86  |
| 11958 | 'Atp5k'    | 155.1 | 200.9 | 254  | 413  | 146  | 528.6 | 173  | 96.69 | 297.2 | 127     |
| 11964 | 'Atp6v1a'  | 159.7 | 146.6 | 169  | 149  | 135  | 112.4 | 145  | 165.1 | 126.9 | 145.74  |
| 11966 | 'Atp6v1b2' | 464.1 | 505.1 | 522  | 502  | 587  | 453.4 | 631  | 661.4 | 587.3 | 524.02  |
| 11972 | 'Atp6v0d1' | 194.7 | 165.2 | 233  | 167  | 188  | 220.6 | 230  | 216   | 325.6 | 264.25  |
| 11973 | 'Atp6v1e1' | 446.4 | 535.1 | 526  | 406  | 464  | 692.9 | 586  | 585.6 | 492.3 | 420.29  |
| 11974 | 'Atp6v0e'  | 70.23 | 38.93 | 26.6 | 40.9 | 45.7 | 87.15 | 71.6 | 20.01 | 34.75 | 30.96   |
| 11975 | 'Atp6v0a1' | 101   | 98.68 | 118  | 74.4 | 89.4 | 30.06 | 82.5 | 117.1 | 102.4 | 123.03  |
| 11977 | 'Atp7a'    | 4.39  | 0.76  | 0.65 | 1.23 | 0.76 | 0.56  | 0    | 0.91  | 0     | 0.85    |
| 11979 | 'Atp7b'    | 0.38  | 0.77  | 1    | 4.88 | 2.17 | 0.26  | 1.48 | 0.42  | 1.9   | 0.72    |
| 11980 | 'Atp8a1'   | 13.15 | 12.49 | 11.3 | 14.6 | 12.3 | 9.51  | 12.8 | 8.34  | 12.32 | 8.43    |
| 11981 | 'Atp9a'    | 31.72 | 50.74 | 35.7 | 45.9 | 80.5 | 61.4  | 44.2 | 35.03 | 32.67 | 63.75   |
| 11982 | 'Atp10a'   | 1     | 0.41  | 2.65 | 0.01 | 0.14 | 0     | 0    | 0.09  | 0     | 0.1     |
| 11983 | 'Atpif1'   | 303.5 | 283.8 | 316  | 340  | 338  | 433.8 | 298  | 253.4 | 321.7 | 307.24  |
| 11984 | 'Atp6v0c'  | 2562  | 2245  | 2245 | 2518 | 2702 | 3031  | 2391 | 2445  | 2123  | 2666.18 |
| 11987 | 'Slc7a1'   | 3.1   | 4.6   | 8.15 | 5.59 | 4.18 | 0.59  | 1.96 | 1.91  | 2.54  | 3.75    |
| 11988 | 'Slc7a2'   | 0.53  | 0.04  | 0.02 | 0.03 | 0.02 | 0.02  | 0.01 | 0.04  | 0.02  | 0.01    |
| 11989 | 'Slc7a3'   | 38.27 | 76.29 | 46.9 | 13.9 | 33.5 | 59.12 | 76.7 | 93.33 | 82.9  | 30.82   |
| 11990 | 'Atrn'     | 3.98  | 2.08  | 5.05 | 4.81 | 5.92 | 4.23  | 5.08 | 4.96  | 4.36  | 3.5     |
| 11991 | 'Hnrnpd'   | 2.69  | 2.66  | 7.12 | 12.6 | 11.3 | 4.87  | 4.51 | 2.37  | 5.04  | 2.65    |
| 11992 | 'Auh'      | 61.81 | 71.85 | 95.7 | 51.7 | 83.7 | 88.83 | 71.7 | 94.81 | 82.05 | 83.13   |
| 11993 | 'Aup1'     | 98.33 | 65.96 | 77.7 | 54   | 68.8 | 99.46 | 86.3 | 59.44 | 86.43 | 64.06   |
| 11994 | 'Pcdh15'   | 0.73  | 0.32  | 6.93 | 4.89 | 1.75 | 1.6   | 9.06 | 2.94  | 1.57  | 0       |
| 11997 | 'Akr1b7'   | 0     | 0     | 4.21 | 0    | 0    | 0     | 0    | 0     | 0     | 0       |
| 11998 | 'Avp'      | 0     | 4.51  | 0.09 | 0    | 0    | 0     | 0    | 0     | 0     | 0.46    |
| 12005 | 'Axin1'    | 7.6   | 1.92  | 0.48 | 7.63 | 3.74 | 6.42  | 9.93 | 1.48  | 3.68  | 0       |
| 12006 | 'Axin2'    | 0.27  | 0.16  | 0.86 | 0.77 | 0.43 | 0.88  | 0.02 | 0     | 0.02  | 3.46    |
| 12009 | 'Cep131'   | 3.85  | 0.49  | 5.78 | 9.14 | 2.8  | 3.07  | 2.25 | 3.17  | 5.12  | 3.28    |
| 12010 | 'B2m'      | 111.1 | 93.11 | 91.4 | 156  | 72.3 | 450.5 | 108  | 53.48 | 208.3 | 248.57  |
| 12013 | 'Bach1'    | 0.16  | 0.38  | 0.57 | 2.79 | 1.64 | 0     | 0    | 0.74  | 0.45  | 0.01    |
| 12014 | 'Bach2'    | 0.01  | 0.91  | 0.18 | 0.81 | 0.65 | 0.21  | 0.13 | 0.26  | 0.03  | 0.9     |
| 12015 | 'Bad'      | 91.95 | 35.11 | 49.2 | 43.8 | 81.2 | 70.8  | 74.5 | 61.39 | 51.14 | 42.79   |
| 12017 | 'Bag1'     | 16.49 | 16.53 | 15.4 | 35.5 | 16.7 | 23.9  | 11.6 | 10.08 | 38.98 | 4.86    |
| 12018 | 'Bak1'     | 0.57  | 0.89  | 3.23 | 0.24 | 0    | 0     | 0.4  | 0.56  | 2.95  | 0.41    |

|        |           |       |       |      |      |      |       |      |       |       |         |
|--------|-----------|-------|-------|------|------|------|-------|------|-------|-------|---------|
| 12021  | 'Bard1'   | 0     | 0.1   | 0    | 0    | 0.6  | 0     | 0.01 | 0     | 0.82  | 0       |
| 12023  | 'Barx2'   | 0     | 2.16  | 0.54 | 0.19 | 0.66 | 0     | 0    | 1.17  | 2.43  | 0       |
| 12028  | 'Bax'     | 78.18 | 54.7  | 47.6 | 152  | 108  | 66.75 | 73.4 | 65.91 | 86.49 | 70.04   |
| 12029  | 'Bcl6b'   | 0     | 0     | 2.63 | 0    | 0    | 0     | 0    | 0     | 0     | 0       |
| 12032  | 'Bcan'    | 23.19 | 33.71 | 73.1 | 43   | 16.7 | 38.1  | 83.4 | 28.82 | 41.66 | 4.58    |
| 12033  | 'Bcap29'  | 52.75 | 55.33 | 49.3 | 65.8 | 39   | 67.17 | 41.2 | 52.01 | 73.39 | 66.41   |
| 12034  | 'Phb2'    | 90.97 | 90.97 | 84.8 | 138  | 72.4 | 121.5 | 68.6 | 110.7 | 98.53 | 50.23   |
| 12035  | 'Bcat1'   | 22.42 | 24.57 | 28.2 | 21.8 | 24.6 | 32.08 | 28.6 | 21.5  | 5.83  | 24.19   |
| 12036  | 'Bcat2'   | 8.11  | 21.15 | 0.95 | 0    | 10.9 | 9.47  | 11.9 | 9.95  | 13.29 | 0       |
| 12038  | 'Bche'    | 0     | 0     | 0    | 0.01 | 0.02 | 0     | 0    | 0     | 0.01  | 0       |
| 12039  | 'Bckdha'  | 34.29 | 34.31 | 43.7 | 43.4 | 59   | 53.11 | 28.2 | 24.23 | 40.39 | 24.98   |
| 12040  | 'Bckdhb'  | 21.78 | 21.99 | 36.6 | 24.1 | 11.2 | 21.35 | 11.6 | 12.67 | 37.99 | 0.03    |
| 12041  | 'Bckdk'   | 38.07 | 34.19 | 25.8 | 37.5 | 39.9 | 46.06 | 58.3 | 42.28 | 39.47 | 48.01   |
| 12042  | 'Bcl10'   | 3.92  | 18.36 | 12   | 18.7 | 4.56 | 5.35  | 21.5 | 15.48 | 0.86  | 16.79   |
| 12043  | 'Bcl2'    | 2.07  | 2.73  | 2.79 | 2.81 | 1.57 | 1.57  | 2.29 | 4.06  | 3.96  | 1.05    |
| 12044  | 'Bcl2a1a' | 1.41  | 0     | 0    | 0    | 0    | 4.73  | 0    | 0     | 0     | 0       |
| 12045  | 'Bcl2a1b' | 0     | 2.37  | 0    | 8.05 | 0    | 15.34 | 0    | 0     | 0     | 6.21    |
| 12047  | 'Bcl2a1d' | 0     | 0.28  | 0    | 1.26 | 0.46 | 5.8   | 0    | 0     | 0     | 0.59    |
| 12048  | 'Bcl2l1'  | 89.11 | 98.77 | 108  | 52.3 | 124  | 80.11 | 81.4 | 91.02 | 112.3 | 95.59   |
| 12050  | 'Bcl2l2'  | 3.55  | 2.62  | 0.76 | 0.23 | 1.81 | 0.04  | 2.63 | 0.54  | 3.16  | 1.91    |
| 12051  | 'Bcl3'    | 1.24  | 0.53  | 0.95 | 0    | 0    | 3.33  | 0    | 0     | 0.43  | 1.47    |
| 12053  | 'Bcl6'    | 3.49  | 3.22  | 0.62 | 4.7  | 1.57 | 3.83  | 0    | 1.16  | 2.82  | 1.14    |
| 12054  | 'Bcl7b'   | 46.83 | 64.31 | 48.7 | 18.9 | 68.9 | 40.74 | 58.3 | 63.08 | 64.97 | 42.64   |
| 12055  | 'Bcl7c'   | 0.99  | 0.57  | 2.43 | 0.01 | 0.59 | 2.1   | 0.74 | 0.13  | 0.46  | 1.08    |
| 12057  | 'Opn1sw'  | 0.56  | 0     | 1.39 | 0    | 0    | 0     | 0    | 0.65  | 0     | 0.02    |
| 12061  | 'Bdkrb1'  | 0     | 0     | 1.28 | 0.04 | 0    | 0     | 0    | 0     | 0     | 0       |
| 12062  | 'Bdkrb2'  | 0     | 0     | 0    | 0    | 0    | 0     | 0    | 0     | 0     | 1.46    |
| 12064  | 'Bdnf'    | 9.64  | 68.7  | 19.5 | 34.1 | 24.2 | 45.62 | 6.26 | 14.24 | 51.36 | 62.09   |
| 12068  | 'Bet1'    | 9.42  | 16.22 | 14.8 | 15.5 | 20.7 | 20.67 | 16.4 | 16.97 | 26.01 | 47.76   |
| 12069  | 'Bex2'    | 1796  | 1962  | 1521 | 2848 | 1822 | 2068  | 1396 | 1974  | 1711  | 2038.57 |
| 12070  | 'Bex3'    | 899.6 | 877.5 | 843  | 1162 | 848  | 1227  | 789  | 836.9 | 869.8 | 1206.79 |
| 12075  | 'Bfsp1'   | 0.02  | 2.81  | 0    | 12.1 | 3.46 | 0     | 6.3  | 0     | 0     | 0       |
| 12091  | 'Glb1'    | 23.06 | 35.34 | 13.6 | 28.1 | 15.6 | 34.83 | 35.3 | 32.41 | 40.86 | 39.33   |
| 12095  | 'Bglap3'  | 0     | 0     | 0    | 0    | 0    | 0     | 0    | 0     | 0.29  | 0       |
| 121021 | 'Cspg4'   | 0     | 0     | 11.2 | 1.76 | 1.14 | 0.73  | 9.61 | 0.38  | 0.01  | 0.01    |
| 121022 | 'Mrps6'   | 133.7 | 62.34 | 79.5 | 69.6 | 63.5 | 57.69 | 86.5 | 68.98 | 70.62 | 75.06   |
| 12116  | 'Bhmt'    | 0     | 0     | 0    | 0    | 0    | 0.02  | 0    | 0     | 0     | 0       |
| 12121  | 'Bicd1'   | 19.96 | 17.96 | 23.4 | 8.84 | 19.6 | 18.39 | 12.7 | 14.43 | 18.57 | 22.07   |
| 12122  | 'Bid'     | 27.65 | 27.55 | 41.1 | 32.1 | 12.6 | 42.8  | 16.6 | 28.89 | 46.6  | 37.98   |
| 12123  | 'Hrk'     | 0.51  | 1.79  | 0    | 2.36 | 0.03 | 1.81  | 0.82 | 0.16  | 1.38  | 0.73    |
| 12125  | 'Bcl2l11' | 0     | 1.07  | 0.02 | 0.2  | 0.03 | 0     | 0.01 | 0     | 0.01  | 0       |
| 12140  | 'Fabp7'   | 33.32 | 43.88 | 26.9 | 34.3 | 22.1 | 46.91 | 89   | 29.02 | 17.05 | 42.95   |
| 12142  | 'Prdm1'   | 0     | 0     | 1.49 | 0    | 0    | 0     | 0    | 0     | 0     | 0       |
| 12144  | 'Blm'     | 0     | 0     | 1.14 | 0    | 0    | 1.53  | 0    | 0.93  | 1.39  | 1.93    |
| 12145  | 'Cxcr5'   | 0     | 0     | 0    | 0    | 0    | 0     | 0    | 0     | 3.74  | 0       |
| 12151  | 'Bmi1'    | 12.29 | 3.67  | 2.77 | 1.58 | 1.56 | 0     | 1.56 | 1.86  | 2.46  | 2.77    |
| 12153  | 'Bmp1'    | 7.95  | 3.17  | 4.67 | 6.55 | 0.73 | 4.76  | 0.03 | 4.1   | 0.01  | 2.29    |
| 12156  | 'Bmp2'    | 0     | 0     | 1.12 | 0    | 0.79 | 0     | 0    | 0     | 0     | 0       |
| 12159  | 'Bmp4'    | 0     | 0     | 8.41 | 0    | 0    | 0     | 0    | 0     | 0     | 0       |
| 12161  | 'Bmp6'    | 0.48  | 0     | 0    | 0.02 | 0    | 0     | 0    | 0     | 0     | 0       |
| 12162  | 'Bmp7'    | 0     | 0.14  | 7.83 | 0.11 | 5.02 | 0     | 2.45 | 1.23  | 0     | 0       |
| 12163  | 'Bmp8a'   | 0     | 0     | 0    | 4.08 | 0    | 0     | 0    | 0     | 0     | 0       |
| 12164  | 'Bmp8b'   | 0     | 0     | 0    | 0    | 0    | 0     | 0    | 0     | 1.99  | 2.5     |
| 12166  | 'Bmpr1a'  | 2.18  | 1.35  | 1.47 | 1.89 | 1.13 | 1.33  | 2.85 | 1.12  | 1.47  | 2.95    |
| 12167  | 'Bmpr1b'  | 3.18  | 0.1   | 0    | 0.01 | 0.38 | 1.92  | 0    | 0.02  | 1.35  | 0.32    |
| 12168  | 'Bmpr2'   | 2.1   | 2.83  | 2.41 | 5.05 | 4.18 | 2.12  | 5.09 | 1.06  | 0.18  | 1.13    |
| 12175  | 'Bnip2'   | 15.78 | 18.12 | 12.6 | 25.3 | 10.5 | 6.17  | 10.3 | 10.77 | 11.86 | 15.26   |
| 12176  | 'Bnip3'   | 184   | 115.5 | 139  | 122  | 183  | 192.4 | 117  | 200.6 | 115.7 | 133.56  |

|       |            |       |       |      |      |      |       |      |       |       |         |
|-------|------------|-------|-------|------|------|------|-------|------|-------|-------|---------|
| 12177 | 'Bnip3l'   | 58.96 | 62.01 | 33.9 | 49.1 | 81.1 | 59.02 | 54.2 | 58.21 | 51.16 | 56.41   |
| 12180 | 'Smyd1'    | 1.01  | 0.01  | 0.01 | 0    | 0    | 1.78  | 0    | 0     | 0.01  | 0       |
| 12181 | 'Bop1'     | 21.45 | 28.21 | 23.2 | 13.6 | 18.1 | 17.84 | 15.4 | 31.32 | 9.51  | 30.53   |
| 12183 | 'Bpgm'     | 33.1  | 26.43 | 43.3 | 63.4 | 39.2 | 39.71 | 16.3 | 49.96 | 16.81 | 57.82   |
| 12189 | 'Brca1'    | 0     | 0     | 1.59 | 0    | 0    | 0     | 0    | 0     | 0.11  | 0       |
| 12190 | 'Brca2'    | 1.59  | 0.3   | 2.47 | 2.67 | 0.16 | 0.84  | 1.85 | 0.07  | 1.64  | 0.81    |
| 12192 | 'Zfp36l1'  | 0.99  | 6.88  | 11.6 | 18.1 | 3.37 | 8.65  | 12.5 | 2.69  | 5.16  | 0.61    |
| 12193 | 'Zfp36l2'  | 1.5   | 1.05  | 0.6  | 2.81 | 0.03 | 0.28  | 5.24 | 1.92  | 0.67  | 0.9     |
| 12209 | 'Brs3'     | 7.89  | 16.63 | 8.61 | 0.02 | 0.02 | 0.03  | 0.02 | 34.03 | 56.16 | 110.34  |
| 12211 | 'Birc6'    | 4.85  | 5.08  | 5.17 | 10.2 | 6.77 | 3.34  | 4.48 | 4.51  | 6.12  | 5.53    |
| 12212 | 'Chic1'    | 13.88 | 7.94  | 30.2 | 0.75 | 3.06 | 6.24  | 19.7 | 4.36  | 7.3   | 9.75    |
| 12215 | 'Bsg'      | 863.9 | 1092  | 797  | 914  | 869  | 992.5 | 784  | 1056  | 1011  | 1182.12 |
| 12217 | 'Bsn'      | 0.78  | 0.95  | 2.05 | 0    | 2.92 | 0.21  | 2.19 | 1.04  | 2.01  | 1.42    |
| 12223 | 'Btc'      | 0.91  | 0.7   | 0.23 | 3.63 | 0    | 0     | 0    | 0     | 0     | 0.04    |
| 12224 | 'Klf5'     | 1.49  | 5.26  | 0    | 14.5 | 0.17 | 0.03  | 2.16 | 0     | 0     | 0       |
| 12226 | 'Btg1'     | 5.11  | 5.7   | 1.81 | 19.6 | 3.64 | 2.34  | 1.64 | 4.25  | 5.34  | 1.12    |
| 12227 | 'Btg2'     | 12.33 | 23.34 | 14.8 | 46.5 | 10.7 | 20.65 | 5.61 | 3.33  | 20.86 | 32.39   |
| 12228 | 'Btg3'     | 12.35 | 8.51  | 1.41 | 11.2 | 11.4 | 0.19  | 0    | 0.37  | 8.28  | 5.31    |
| 12229 | 'Btk'      | 0     | 0.17  | 0    | 0.27 | 0    | 0     | 0    | 0     | 0     | 0       |
| 12231 | 'Btn1a1'   | 0     | 0     | 0    | 0    | 0    | 0     | 0    | 0.24  | 0     | 0       |
| 12234 | 'Btrc'     | 42.13 | 25.74 | 27.3 | 18.6 | 15.3 | 38.68 | 26.2 | 20.61 | 32.19 | 37.44   |
| 12235 | 'Bub1'     | 0.02  | 0     | 0    | 0    | 0    | 0     | 0    | 0     | 0     | 0       |
| 12236 | 'Bub1b'    | 0     | 0.9   | 0    | 0    | 2.5  | 0     | 0    | 0     | 1.76  | 0       |
| 12237 | 'Bub3'     | 138.9 | 109.8 | 182  | 210  | 104  | 147.7 | 109  | 270.9 | 191.4 | 148.33  |
| 12238 | 'Commd3'   | 126   | 119.8 | 136  | 131  | 140  | 189.7 | 75.1 | 113.7 | 91.47 | 109.78  |
| 12257 | 'Tspo'     | 0.38  | 0.18  | 4.65 | 7.57 | 0    | 31.14 | 0    | 3.45  | 0.05  | 8.44    |
| 12258 | 'Serping1' | 0     | 3.9   | 7.62 | 9.47 | 5.63 | 0.03  | 0    | 4.98  | 5.54  | 8.8     |
| 12259 | 'C1qa'     | 0     | 22.78 | 9.16 | 35.1 | 45.7 | 219.4 | 37   | 4.32  | 16.08 | 3.62    |
| 12260 | 'C1qb'     | 3.82  | 45.54 | 27.5 | 48.7 | 42.8 | 444.1 | 40   | 24.47 | 5.27  | 21.31   |
| 12261 | 'C1qbp'    | 101.2 | 90.77 | 111  | 70.4 | 84   | 104.6 | 80.5 | 120.4 | 93.68 | 81.09   |
| 12262 | 'C1qc'     | 8.31  | 8.98  | 2.92 | 44.9 | 29.9 | 50.07 | 0.05 | 1.22  | 0.04  | 0       |
| 12263 | 'C2'       | 1.62  | 0.02  | 0    | 0    | 0    | 0     | 0    | 0     | 0     | 0       |
| 12265 | 'Ciita'    | 0     | 0     | 0    | 0    | 0.25 | 0     | 0    | 0     | 0     | 0.01    |
| 12266 | 'C3'       | 0     | 0     | 0    | 0    | 1.08 | 0     | 4.48 | 2.15  | 0     | 0       |
| 12267 | 'C3ar1'    | 0.46  | 0.93  | 0    | 0    | 0    | 4.18  | 0    | 0     | 0     | 0       |
| 12268 | 'C4b'      | 0     | 0     | 3.43 | 5.43 | 24.3 | 0     | 0.01 | 0     | 0.01  | 0.01    |
| 12274 | 'C6'       | 0     | 0     | 0    | 0.08 | 0.07 | 0     | 0    | 0     | 0     | 0.03    |
| 12282 | 'Hyou1'    | 16.81 | 10.48 | 15   | 5.13 | 7.05 | 1.85  | 8.16 | 9.36  | 38.79 | 15.92   |
| 12283 | 'Cab39'    | 6.39  | 4.83  | 9.83 | 34   | 10.9 | 0.52  | 5.09 | 10.6  | 6.66  | 7.78    |
| 12286 | 'Cacna1a'  | 0.63  | 0.33  | 2.58 | 1.96 | 1.07 | 1.23  | 0.77 | 0.09  | 0.13  | 0.64    |
| 12287 | 'Cacna1b'  | 5.28  | 10.14 | 8.91 | 5.27 | 3.96 | 6.17  | 7.22 | 7.16  | 13    | 7.45    |
| 12288 | 'Cacna1c'  | 0.65  | 1.34  | 0.16 | 0.73 | 0.79 | 0.01  | 1.36 | 0.47  | 0.38  | 0.54    |
| 12289 | 'Cacna1d'  | 2.25  | 2.1   | 1.93 | 1.33 | 1.85 | 0     | 1.2  | 1.01  | 2.54  | 1.55    |
| 12290 | 'Cacna1e'  | 10.56 | 8.1   | 17.5 | 4.89 | 13.8 | 7.8   | 10.1 | 9.56  | 1.97  | 12.31   |
| 12291 | 'Cacna1g'  | 3.04  | 4.73  | 1.99 | 9.3  | 9.24 | 1.12  | 4.38 | 2.88  | 3.91  | 1.73    |
| 12292 | 'Cacna1s'  | 0.24  | 0.44  | 0    | 0    | 0    | 0     | 0    | 0     | 0     | 0       |
| 12293 | 'Cacna2d1' | 5.29  | 15.08 | 14.1 | 23   | 14.7 | 8.92  | 19.9 | 3.37  | 14.6  | 26.86   |
| 12294 | 'Cacna2d3' | 4.14  | 9.35  | 0.15 | 0.45 | 0.03 | 0     | 0    | 1.97  | 5.39  | 0       |
| 12295 | 'Cacnb1'   | 15.54 | 9.46  | 8.28 | 2.14 | 10.7 | 11.38 | 8.56 | 8.2   | 13.75 | 5.64    |
| 12296 | 'Cacnb2'   | 1.37  | 0.52  | 1.66 | 0.86 | 1.96 | 2.92  | 2.91 | 1.36  | 3.66  | 1.55    |
| 12297 | 'Cacnb3'   | 15.76 | 36.36 | 34.3 | 10.2 | 22.4 | 32.98 | 39.9 | 31.95 | 38.08 | 22.75   |
| 12298 | 'Cacnb4'   | 11.46 | 6.73  | 11.6 | 10.1 | 8.12 | 4.06  | 7.11 | 4.23  | 8.92  | 5.39    |
| 12299 | 'Cacng1'   | 0     | 0     | 0    | 0    | 0    | 0     | 0    | 1.98  | 0     | 0       |
| 12300 | 'Cacng2'   | 8.43  | 5.43  | 18   | 16.1 | 11.2 | 10.67 | 12   | 8.76  | 9.63  | 4.04    |
| 12301 | 'Cacybp'   | 183.6 | 186.4 | 143  | 171  | 106  | 120.5 | 105  | 141.1 | 154.7 | 179.34  |
| 12304 | 'Pdia4'    | 37.11 | 91.93 | 37.1 | 14.5 | 48.4 | 41.96 | 20.7 | 52.45 | 66.11 | 78.31   |
| 12305 | 'Ddr1'     | 5.41  | 5.57  | 3.11 | 3.68 | 13.3 | 2.91  | 1.5  | 5.2   | 4.5   | 4.5     |
| 12306 | 'Anxa2'    | 0     | 0     | 0.04 | 0    | 7.7  | 2.24  | 0    | 0     | 0.22  | 0       |





|       |            |       |       |      |      |      |       |      |       |       |        |
|-------|------------|-------|-------|------|------|------|-------|------|-------|-------|--------|
| 12395 | 'Runx1t1'  | 1.64  | 3.88  | 6.71 | 1.83 | 5.58 | 3.71  | 1.32 | 2.56  | 0.54  | 4.46   |
| 12396 | 'Cbfa2t2'  | 15.28 | 16.15 | 10.3 | 8.19 | 13   | 13.38 | 10.9 | 12.18 | 11.78 | 14.29  |
| 12398 | 'Cbfa2t3'  | 0.01  | 0.34  | 0.01 | 0.13 | 1.07 | 0     | 0    | 0     | 0     | 0.94   |
| 12399 | 'Runx3'    | 0.01  | 0     | 0    | 0.02 | 0.02 | 0     | 0.01 | 0.01  | 0.01  | 0      |
| 12400 | 'Cbfb'     | 3.2   | 7.09  | 2.25 | 9.67 | 3.91 | 1.44  | 1.98 | 8.36  | 12.5  | 10.25  |
| 12402 | 'Cbl'      | 1.52  | 2.2   | 6.89 | 5.46 | 1.95 | 0.91  | 0.09 | 1.52  | 2.45  | 3.33   |
| 12404 | 'Cbln1'    | 0.02  | 19.98 | 4.6  | 0    | 1.11 | 5.04  | 11.5 | 0     | 0.33  | 3.6    |
| 12405 | 'Cbln2'    | 16.26 | 112.8 | 51.8 | 130  | 7.75 | 51.91 | 5.47 | 11.58 | 305.6 | 75.39  |
| 12406 | 'Serpinh1' | 2.58  | 0     | 0.74 | 0    | 0.11 | 0     | 0    | 0.52  | 1.94  | 1.56   |
| 12408 | 'Cbr1'     | 146.5 | 133.5 | 134  | 117  | 184  | 181.4 | 198  | 179.6 | 134.7 | 133.61 |
| 12411 | 'Cbs'      | 2.82  | 10.71 | 1.93 | 16.4 | 1.83 | 5.7   | 13.5 | 1.31  | 1.09  | 1.4    |
| 12412 | 'Cbx1'     | 32.05 | 23.06 | 16.9 | 32.8 | 43.1 | 7.76  | 25.2 | 30.94 | 20.64 | 33.33  |
| 12416 | 'Cbx2'     | 0.81  | 0     | 0.14 | 0    | 0.01 | 0.29  | 3.6  | 0     | 1.06  | 0      |
| 12417 | 'Cbx3'     | 202.3 | 206   | 184  | 329  | 239  | 105.2 | 156  | 202.5 | 160.9 | 190.64 |
| 12418 | 'Cbx4'     | 3.17  | 4.87  | 6.29 | 9.29 | 0.16 | 0.75  | 1.98 | 1.72  | 4.76  | 2.99   |
| 12419 | 'Cbx5'     | 110.8 | 68.51 | 54.9 | 73.7 | 105  | 76.93 | 104  | 100.6 | 69.22 | 86.47  |
| 12421 | 'Rb1cc1'   | 4.91  | 3.57  | 4.61 | 17.3 | 7.4  | 2.66  | 3.96 | 4.71  | 8.22  | 5.86   |
| 12424 | 'Cck'      | 0     | 3.19  | 246  | 188  | 62.1 | 73.22 | 0    | 1.06  | 83.84 | 96.2   |
| 12425 | 'Cckar'    | 21.54 | 5.79  | 4.36 | 0    | 4.55 | 8.44  | 1.85 | 11.24 | 0.03  | 0.01   |
| 12426 | 'Cckbr'    | 3.02  | 4.38  | 2.45 | 0    | 0    | 0     | 4.93 | 7.94  | 0.02  | 1.39   |
| 12427 | 'Ccna1'    | 0.03  | 0.31  | 3.19 | 0    | 0    | 0     | 0    | 2.92  | 5.8   | 0      |
| 12428 | 'Ccna2'    | 1.91  | 2.96  | 0.05 | 0.21 | 0.15 | 2.37  | 0.59 | 0.83  | 0.32  | 1.37   |
| 12442 | 'Ccnb2'    | 2.23  | 0     | 2.27 | 0    | 0    | 0     | 0    | 0     | 0     | 1.74   |
| 12443 | 'Ccnd1'    | 0.13  | 17.87 | 28.4 | 0    | 15.1 | 6.16  | 16.2 | 3.89  | 17.96 | 29.76  |
| 12444 | 'Ccnd2'    | 0.03  | 4.75  | 5.08 | 0.04 | 3.39 | 1.41  | 4.61 | 4.85  | 4.77  | 3.95   |
| 12445 | 'Ccnd3'    | 27.78 | 30.19 | 30.2 | 12.8 | 23.9 | 15.4  | 21.3 | 8.04  | 31.15 | 47.53  |
| 12447 | 'Ccne1'    | 12.69 | 8.71  | 5.25 | 13.4 | 5.17 | 12.77 | 0.03 | 17.05 | 0     | 3.58   |
| 12448 | 'Ccne2'    | 3.98  | 0.15  | 0.14 | 6.95 | 3.56 | 3.88  | 0.18 | 1.58  | 0.41  | 0      |
| 12449 | 'Ccnf'     | 0     | 2.39  | 2.73 | 0    | 3.98 | 2.53  | 0    | 0.01  | 1.18  | 0.01   |
| 12450 | 'Ccng1'    | 15.45 | 10.21 | 8.36 | 9.78 | 29.6 | 4.61  | 9.16 | 14.13 | 13.41 | 8.86   |
| 12452 | 'Ccng2'    | 0     | 5.29  | 0.27 | 0.45 | 1.73 | 0     | 0    | 6.09  | 4.94  | 2.23   |
| 12453 | 'Ccnl'     | 6.96  | 1.95  | 0.34 | 17.1 | 7.79 | 3.56  | 0.02 | 2.11  | 5.46  | 5.87   |
| 12454 | 'Ccnk'     | 2.33  | 1.93  | 2.45 | 0.63 | 0.06 | 4.77  | 5.86 | 1.97  | 0.38  | 2.04   |
| 12455 | 'Ccnt1'    | 23.78 | 21.95 | 18.2 | 18.2 | 21.2 | 14.39 | 24.7 | 19.13 | 14.27 | 20.51  |
| 12457 | 'Noct'     | 3.77  | 0.98  | 7.66 | 8.26 | 4.76 | 0.38  | 2.38 | 2.33  | 3.16  | 0.3    |
| 12460 | 'Ccs'      | 25.09 | 31.79 | 57.2 | 84.1 | 26.7 | 26.65 | 45.4 | 79.68 | 48.13 | 45.55  |
| 12461 | 'Cct2'     | 67.84 | 125.5 | 75   | 97.9 | 66.2 | 90.88 | 122  | 81.11 | 65.32 | 74.55  |
| 12462 | 'Cct3'     | 230.8 | 225.5 | 193  | 228  | 157  | 231.8 | 218  | 164.3 | 214.6 | 229.35 |
| 12464 | 'Cct4'     | 145.4 | 143.2 | 106  | 65   | 74.7 | 134.8 | 88.5 | 144.3 | 157.5 | 157.21 |
| 12465 | 'Cct5'     | 204.7 | 200.1 | 221  | 213  | 170  | 262.5 | 237  | 226.6 | 290.5 | 267.16 |
| 12466 | 'Cct6a'    | 155.5 | 187.3 | 141  | 156  | 136  | 183.9 | 198  | 192   | 154.8 | 157.7  |
| 12467 | 'Cct6b'    | 0     | 0     | 0.05 | 0    | 0    | 0     | 0    | 0     | 0     | 0      |
| 12468 | 'Cct7'     | 360.8 | 312.3 | 294  | 440  | 293  | 382.2 | 343  | 298.8 | 356.7 | 413.1  |
| 12469 | 'Cct8'     | 246.1 | 282.7 | 266  | 229  | 160  | 255.9 | 282  | 258.7 | 227.6 | 268.98 |
| 12475 | 'Cd14'     | 0     | 0     | 0    | 0    | 3.05 | 20.37 | 0    | 0     | 0.03  | 0      |
| 12476 | 'Cd151'    | 27.27 | 24.56 | 21.1 | 49.6 | 37.4 | 37.48 | 22   | 29.88 | 11.56 | 40.09  |
| 12479 | 'Cd1d1'    | 0     | 6.77  | 0.65 | 0    | 0.03 | 12.38 | 11.4 | 4.69  | 55.75 | 77.25  |
| 12483 | 'Cd22'     | 0.02  | 0.01  | 0.02 | 0    | 0.06 | 0.03  | 0    | 0.02  | 0     | 0      |
| 12484 | 'Cd24a'    | 3.32  | 50.72 | 44.5 | 28.2 | 1.63 | 0.03  | 0.03 | 21.32 | 3.94  | 4.79   |
| 12488 | 'Cd2ap'    | 1.95  | 1.25  | 0.72 | 0.59 | 1.91 | 0.84  | 0.37 | 1.89  | 1.78  | 1.11   |
| 12489 | 'Cd33'     | 0     | 0     | 0    | 0    | 4.65 | 0.31  | 0    | 0     | 0     | 0.02   |
| 12490 | 'Cd34'     | 0     | 0     | 0    | 75.8 | 0    | 4.04  | 4.97 | 2.73  | 0     | 0      |
| 12491 | 'Cd36'     | 15.2  | 9.56  | 0.6  | 5.67 | 0.18 | 4.24  | 0.18 | 4.87  | 0.51  | 2.66   |
| 12492 | 'Scarb2'   | 16.88 | 19.17 | 14.3 | 7.19 | 10.2 | 8.82  | 19.1 | 18.22 | 22.22 | 17.66  |
| 12493 | 'Cd37'     | 0     | 0     | 0    | 0    | 0    | 25.75 | 0    | 0     | 0     | 4.31   |
| 12494 | 'Cd38'     | 10.11 | 5.8   | 0.02 | 3.97 | 0.12 | 2.85  | 0.02 | 3.21  | 3.17  | 3.04   |
| 12495 | 'Entpd1'   | 0     | 0     | 0    | 0    | 1.71 | 6.46  | 3.32 | 1.49  | 0     | 1.04   |
| 12496 | 'Entpd2'   | 4.04  | 12.51 | 0    | 15   | 3.93 | 12.81 | 0    | 5.02  | 5.82  | 3.97   |

|       |            |       |       |      |      |      |       |      |       |       |        |
|-------|------------|-------|-------|------|------|------|-------|------|-------|-------|--------|
| 12497 | 'Entpd6'   | 78.9  | 92.95 | 80.4 | 53.9 | 64   | 70.02 | 68.5 | 90.39 | 102.1 | 124.44 |
| 12499 | 'Entpd5'   | 6.77  | 12.15 | 6.02 | 7.46 | 8.07 | 6.64  | 8.77 | 4.91  | 11.93 | 10.01  |
| 12503 | 'Cd247'    | 0     | 0     | 0    | 0    | 0.41 | 0     | 1    | 0     | 0     | 0.14   |
| 12504 | 'Cd4'      | 0     | 0     | 0    | 0    | 0    | 0     | 0    | 0.65  | 0     | 0      |
| 12505 | 'Cd44'     | 0.01  | 2.04  | 0    | 0    | 0.26 | 0     | 0.01 | 0     | 0.01  | 2.66   |
| 12507 | 'Cd5'      | 0     | 3.06  | 0.02 | 0    | 0.02 | 0     | 7.49 | 0     | 0     | 0.02   |
| 12508 | 'Cd53'     | 0     | 0     | 0.05 | 0    | 0    | 10.14 | 3.49 | 0.55  | 0     | 2.53   |
| 12509 | 'Cd59a'    | 31.22 | 16.24 | 17.5 | 39.5 | 10.5 | 12.27 | 8.21 | 21.36 | 6.15  | 9.41   |
| 12511 | 'Cd6'      | 0     | 0     | 0    | 2.17 | 0    | 0     | 0    | 0     | 0     | 0      |
| 12512 | 'Cd63'     | 117   | 91.11 | 101  | 141  | 104  | 123.1 | 50.7 | 65.33 | 78.27 | 118.04 |
| 12514 | 'Cd68'     | 0.94  | 8.54  | 3.75 | 12.4 | 6.57 | 15.77 | 2.26 | 0.03  | 0.92  | 9.03   |
| 12515 | 'Cd69'     | 0     | 0     | 0.09 | 0    | 0    | 0     | 0    | 0     | 0     | 0      |
| 12517 | 'Cd72'     | 0     | 0.04  | 0.08 | 0    | 0    | 1.27  | 0    | 0     | 0     | 0      |
| 12518 | 'Cd79a'    | 0     | 0     | 0    | 0    | 0    | 0     | 2.57 | 0     | 0     | 0      |
| 12519 | 'Cd80'     | 0     | 0.08  | 0    | 0    | 0    | 0.16  | 0    | 0     | 0     | 0.03   |
| 12520 | 'Cd81'     | 699.7 | 688.8 | 672  | 681  | 478  | 761.3 | 613  | 643.8 | 633   | 624.73 |
| 12521 | 'Cd82'     | 17.26 | 26.39 | 11.6 | 13.8 | 5.08 | 54.1  | 0    | 23.1  | 12.24 | 5.38   |
| 12522 | 'Cd83'     | 66.78 | 56.5  | 82   | 29.7 | 75.6 | 115.9 | 97.4 | 103.4 | 103.1 | 54.67  |
| 12523 | 'Cd84'     | 0.75  | 0.38  | 1.14 | 0.06 | 0.64 | 3.85  | 1.17 | 0.4   | 0.93  | 1.6    |
| 12524 | 'Cd86'     | 1.32  | 0     | 0    | 2.17 | 0    | 0.02  | 0    | 0     | 0     | 0      |
| 12525 | 'Cd8a'     | 0     | 0     | 0.4  | 0    | 0.03 | 0     | 0    | 0     | 0.05  | 0      |
| 12526 | 'Cd8b1'    | 0.03  | 0.03  | 0    | 0    | 0.04 | 0.07  | 0    | 0.21  | 0     | 0.03   |
| 12527 | 'Cd9'      | 17.39 | 18.87 | 91.3 | 28.4 | 8.93 | 118   | 86.7 | 26.64 | 2.37  | 6.24   |
| 12530 | 'Cdc25a'   | 4.18  | 6.36  | 1.61 | 18.5 | 2.48 | 4.5   | 6.98 | 3.28  | 5.83  | 0.12   |
| 12531 | 'Cdc25b'   | 0.78  | 0.83  | 0.63 | 0    | 0.56 | 0     | 0    | 3.08  | 2.52  | 2.33   |
| 12532 | 'Cdc25c'   | 0     | 0     | 0    | 0    | 0    | 5.2   | 0.03 | 0     | 0     | 0      |
| 12537 | 'Cdk11b'   | 13.86 | 18    | 34.3 | 18.3 | 28.7 | 22.18 | 7.34 | 17.89 | 20.31 | 16.88  |
| 12539 | 'Cdc37'    | 99.76 | 90.3  | 110  | 105  | 97.3 | 87.76 | 82.2 | 103.6 | 106.2 | 91.8   |
| 12540 | 'Cdc42'    | 438.7 | 410.2 | 409  | 430  | 300  | 488   | 362  | 392.3 | 320.8 | 367.58 |
| 12544 | 'Cdc45'    | 3.82  | 0     | 2.63 | 0    | 0    | 0     | 4.53 | 4.48  | 0     | 0      |
| 12545 | 'Cdc7'     | 15.49 | 29.11 | 13.2 | 0    | 19.2 | 3.66  | 31.3 | 20.52 | 31.68 | 13.96  |
| 12549 | 'Arhgap31' | 0     | 0     | 0.42 | 0.18 | 0    | 0     | 2.15 | 0     | 0     | 0.04   |
| 12550 | 'Cdh1'     | 0     | 0     | 0.01 | 0    | 0    | 0     | 0    | 0     | 0     | 0      |
| 12552 | 'Cdh11'    | 7.08  | 13.36 | 14.4 | 6.33 | 9.89 | 8.27  | 14.4 | 12.13 | 12.34 | 9.12   |
| 12554 | 'Cdh13'    | 97.15 | 67.79 | 93.5 | 71   | 73.3 | 190.8 | 75.3 | 92.63 | 40.26 | 30.57  |
| 12555 | 'Cdh15'    | 1.38  | 5.56  | 7.57 | 18   | 4.31 | 7.89  | 1.83 | 1.94  | 2.99  | 4.45   |
| 12556 | 'Cdh16'    | 0     | 0.02  | 0    | 0.19 | 0.03 | 0     | 0.02 | 0.08  | 0.06  | 0.03   |
| 12557 | 'Cdh17'    | 0     | 0     | 0.01 | 0    | 1.9  | 0.83  | 0    | 0     | 0     | 0      |
| 12558 | 'Cdh2'     | 19.9  | 30.88 | 24.5 | 20.1 | 13.3 | 11.26 | 17   | 11.73 | 15.74 | 10.46  |
| 12561 | 'Cdh4'     | 5.11  | 7.28  | 7.31 | 2.94 | 0.8  | 0.01  | 11.5 | 4.99  | 1.53  | 6.36   |
| 12562 | 'Cdh5'     | 0     | 0     | 0.01 | 0    | 0    | 0     | 0    | 0     | 0     | 0      |
| 12563 | 'Cdh6'     | 2.12  | 1.4   | 1.64 | 3.37 | 2.55 | 0.15  | 0.76 | 4.49  | 0     | 0.3    |
| 12564 | 'Cdh8'     | 9.71  | 8.93  | 18.2 | 1.09 | 9.98 | 1.2   | 21.9 | 25.36 | 6.8   | 3.61   |
| 12565 | 'Cdh9'     | 2.95  | 0     | 0.19 | 0    | 1.69 | 6.14  | 0.05 | 1.37  | 0.01  | 12.1   |
| 12566 | 'Cdk2'     | 0     | 0     | 0    | 0    | 0    | 0     | 4.69 | 0     | 0     | 0      |
| 12567 | 'Cdk4'     | 53.06 | 65.4  | 53.2 | 40.8 | 82.1 | 55.02 | 86.4 | 100.4 | 51.02 | 48.71  |
| 12568 | 'Cdk5'     | 144.8 | 118.3 | 130  | 157  | 103  | 169.2 | 110  | 182.2 | 93.62 | 90.38  |
| 12569 | 'Cdk5r1'   | 3.74  | 1.24  | 4.33 | 6.87 | 7.4  | 4.29  | 2.75 | 2.77  | 8.28  | 3.27   |
| 12570 | 'Cdk5r2'   | 3.9   | 1.08  | 1.27 | 3.93 | 4.81 | 0.87  | 1.95 | 3.99  | 2.6   | 3.2    |
| 12571 | 'Cdk6'     | 0     | 0.35  | 0    | 0.01 | 0.01 | 0.73  | 0    | 0.01  | 0.01  | 0.01   |
| 12572 | 'Cdk7'     | 5.89  | 4.59  | 6.75 | 2.77 | 6.55 | 5.13  | 0.96 | 6.23  | 5.8   | 7.05   |
| 12575 | 'Cdkn1a'   | 2.08  | 3.8   | 5.45 | 24   | 2.25 | 10.44 | 0.34 | 1.53  | 13.25 | 13.7   |
| 12576 | 'Cdkn1b'   | 9.59  | 8.06  | 6.29 | 7.19 | 9.67 | 7.54  | 2.55 | 4.25  | 12.69 | 11.45  |
| 12577 | 'Cdkn1c'   | 0     | 0     | 0    | 0    | 0.93 | 0     | 1.21 | 0     | 0     | 0      |
| 12580 | 'Cdkn2c'   | 0     | 0     | 0    | 0    | 0.23 | 0     | 0    | 0     | 0     | 0      |
| 12581 | 'Cdkn2d'   | 166.6 | 153.6 | 132  | 136  | 163  | 235.9 | 136  | 186.8 | 164.1 | 130.95 |
| 12583 | 'Cdo1'     | 34.85 | 36.51 | 68.7 | 33.5 | 63.2 | 34.89 | 47.4 | 34.67 | 23.42 | 22.84  |
| 12585 | 'Cdr2'     | 3.89  | 1.32  | 0    | 0    | 2.04 | 0     | 0    | 0     | 3.41  | 0      |





|       |          |       |       |      |      |      |       |      |       |       |         |
|-------|----------|-------|-------|------|------|------|-------|------|-------|-------|---------|
| 12834 | 'Col6a2' | 0     | 4.36  | 0    | 0    | 2.67 | 0.29  | 0    | 0     | 0.01  | 0       |
| 12835 | 'Col6a3' | 0     | 0     | 0.16 | 0    | 0    | 0     | 0    | 0.59  | 0     | 0       |
| 12836 | 'Col7a1' | 0     | 0.19  | 0.03 | 0.16 | 0.14 | 0     | 1.37 | 0.48  | 0     | 0.16    |
| 12837 | 'Col8a1' | 0     | 0     | 0.06 | 0    | 0    | 0     | 0    | 0.95  | 0     | 0       |
| 12839 | 'Col9a1' | 0     | 1.14  | 2.24 | 1.46 | 7.1  | 3.07  | 0    | 1.54  | 0     | 2.01    |
| 12840 | 'Col9a2' | 2.85  | 2.85  | 11.4 | 8.11 | 6.78 | 5.73  | 4.94 | 4.42  | 11.01 | 4.59    |
| 12841 | 'Col9a3' | 6.16  | 4.91  | 6.11 | 0    | 1.84 | 3.76  | 6.75 | 2.07  | 3.15  | 3.38    |
| 12842 | 'Col1a1' | 0     | 0.02  | 0    | 0    | 0    | 0     | 0    | 0     | 0.06  | 0       |
| 12843 | 'Col1a2' | 0     | 0     | 0    | 0    | 0.02 | 0     | 2.63 | 0     | 0     | 0.87    |
| 12845 | 'Comp'   | 0     | 0.1   | 0    | 0    | 0    | 0     | 0.29 | 0.02  | 0     | 0       |
| 12846 | 'Comt'   | 93.43 | 70.94 | 84.5 | 34.5 | 69.8 | 133.2 | 83.9 | 84.91 | 75.35 | 83.23   |
| 12847 | 'Copa'   | 26.18 | 47.81 | 45.3 | 62.5 | 32.4 | 32.12 | 15.8 | 31.01 | 41.71 | 37.09   |
| 12848 | 'Cops2'  | 26.53 | 41.73 | 26.9 | 30.7 | 32.1 | 17.92 | 27.7 | 30.35 | 19.62 | 40.07   |
| 12850 | 'Coq7'   | 105   | 112.1 | 206  | 212  | 155  | 173.4 | 133  | 183.2 | 132.1 | 156.57  |
| 12854 | 'Cort'   | 0     | 0     | 1.07 | 0    | 0    | 0     | 0    | 0     | 0     | 0       |
| 12856 | 'Cox17'  | 209.3 | 277.1 | 302  | 455  | 150  | 331   | 228  | 125.9 | 370.6 | 175.59  |
| 12857 | 'Cox4i1' | 1452  | 1159  | 1344 | 1278 | 1703 | 1990  | 1741 | 1423  | 1262  | 1691.11 |
| 12858 | 'Cox5a'  | 617   | 484.7 | 662  | 561  | 565  | 813.4 | 682  | 663   | 560   | 515.39  |
| 12859 | 'Cox5b'  | 722.4 | 648.7 | 985  | 606  | 837  | 1015  | 893  | 681.7 | 739.8 | 608.93  |
| 12861 | 'Cox6a1' | 818.3 | 674.2 | 893  | 839  | 818  | 981.6 | 890  | 674.7 | 742.1 | 688.26  |
| 12862 | 'Cox6a2' | 2.75  | 0.7   | 16.2 | 31   | 5.68 | 22.35 | 2.94 | 13.85 | 5.79  | 3.85    |
| 12864 | 'Cox6c'  | 572   | 513.5 | 627  | 616  | 513  | 853.5 | 565  | 353.2 | 463.1 | 455.59  |
| 12865 | 'Cox7a1' | 4.61  | 0.31  | 11.9 | 2.6  | 3.77 | 9.93  | 8.97 | 4.94  | 2.53  | 3.06    |
| 12866 | 'Cox7a2' | 405.1 | 363.1 | 508  | 448  | 397  | 502.6 | 430  | 301.9 | 472.4 | 382.36  |
| 12867 | 'Cox7c'  | 362.8 | 442.1 | 472  | 459  | 350  | 536.9 | 449  | 223.9 | 462.4 | 320.08  |
| 12868 | 'Cox8a'  | 1286  | 1202  | 1358 | 1260 | 1124 | 1707  | 1441 | 984.1 | 1087  | 1184.36 |
| 12869 | 'Cox8b'  | 1.6   | 0.62  | 6.55 | 2.44 | 1.11 | 2.89  | 2.75 | 1.05  | 1     | 1.83    |
| 12870 | 'Cp'     | 0.01  | 0.11  | 4.47 | 0.25 | 0.25 | 0     | 5.82 | 1.13  | 0     | 0       |
| 12874 | 'Cpd'    | 0.72  | 0.36  | 1.41 | 0.12 | 0.34 | 0.52  | 1.44 | 0.44  | 0.69  | 0.34    |
| 12876 | 'Cpe'    | 257.3 | 222.2 | 142  | 594  | 169  | 208.5 | 194  | 213.9 | 428.8 | 156.55  |
| 12877 | 'Cpeb1'  | 18.36 | 12.7  | 23.4 | 5.4  | 13.9 | 19.87 | 21   | 24.84 | 11.06 | 14.16   |
| 12879 | 'Cys1'   | 2.01  | 0     | 0.25 | 0.26 | 2.04 | 2.19  | 0.4  | 0     | 0     | 0       |
| 12889 | 'Cplx1'  | 52.65 | 36.03 | 295  | 14.9 | 154  | 33.74 | 136  | 176.9 | 23.55 | 17.51   |
| 12890 | 'Cplx2'  | 33.68 | 33.89 | 49.9 | 35.3 | 64.1 | 24.37 | 29.3 | 56.04 | 48.88 | 28.15   |
| 12891 | 'Cpne6'  | 131.8 | 95.64 | 120  | 128  | 116  | 90.07 | 99.3 | 178.8 | 105.4 | 112.16  |
| 12892 | 'Cpox'   | 2.4   | 2.23  | 0.57 | 3.36 | 7.2  | 1.48  | 2.75 | 2.07  | 6.11  | 2.27    |
| 12894 | 'Cpt1a'  | 0.01  | 4.51  | 0    | 0    | 0.05 | 0     | 0    | 0.25  | 0.01  | 0       |
| 12895 | 'Cpt1b'  | 0.78  | 10.48 | 0.16 | 0.21 | 0.05 | 0.05  | 4.08 | 0.03  | 0.01  | 0.09    |
| 12896 | 'Cpt2'   | 18.54 | 7.64  | 12   | 26.5 | 18.9 | 17.49 | 1.74 | 7.85  | 8.29  | 21.39   |
| 12902 | 'Cr2'    | 0     | 0     | 0    | 0.03 | 0.02 | 0     | 0    | 0     | 0.01  | 0       |
| 12903 | 'Crabp1' | 0     | 6.31  | 0    | 0    | 3.68 | 0     | 0    | 2.64  | 0     | 0       |
| 12904 | 'Crabp2' | 0     | 0     | 0    | 0    | 0    | 0     | 5.57 | 0     | 5.15  | 0       |
| 12905 | 'Cradd'  | 6.15  | 11.49 | 12.7 | 2.08 | 3.08 | 25.7  | 8.81 | 14.91 | 5.24  | 12.51   |
| 12908 | 'Crat'   | 7.24  | 2.03  | 9.04 | 3.52 | 4.57 | 16.52 | 25.2 | 10.91 | 3.99  | 5.29    |
| 12909 | 'Crcp'   | 43.29 | 47    | 45   | 31.2 | 83.7 | 89.89 | 64.5 | 71.28 | 32.52 | 85.41   |
| 12912 | 'Creb1'  | 2.79  | 2.15  | 4.04 | 2.33 | 1.75 | 4.92  | 1.57 | 2.74  | 2.45  | 2.69    |
| 12913 | 'Creb3'  | 93.79 | 82.83 | 122  | 159  | 64.3 | 106.9 | 94.1 | 101.3 | 138.8 | 158.51  |
| 12914 | 'Crebbp' | 8.15  | 8.15  | 6.94 | 14.8 | 10.9 | 4.95  | 7.2  | 5.02  | 5.96  | 6.63    |
| 12915 | 'Atf6b'  | 12.74 | 16.29 | 20.4 | 6.97 | 14.2 | 5.88  | 11   | 5.84  | 11.77 | 23.72   |
| 12916 | 'Crem'   | 16.29 | 15.37 | 2.46 | 10.1 | 11.3 | 4.92  | 2.83 | 7.53  | 34.18 | 39.71   |
| 12918 | 'Crh'    | 0     | 7.79  | 0.37 | 7.45 | 0.15 | 0     | 131  | 16.7  | 2.75  | 0       |
| 12919 | 'Crhbp'  | 0.03  | 5.42  | 0.03 | 0    | 15.8 | 28.25 | 1.26 | 0.02  | 3.4   | 25.9    |
| 12921 | 'Crhr1'  | 0     | 1.51  | 2.07 | 2.68 | 1.39 | 0     | 3.92 | 0.03  | 0     | 0       |
| 12922 | 'Crhr2'  | 95.98 | 120.6 | 86.8 | 50   | 0    | 0     | 0    | 0     | 0     | 0       |
| 12925 | 'Crip1'  | 3.39  | 4     | 0.49 | 16.8 | 14.4 | 10.61 | 0    | 1.84  | 0     | 2.73    |
| 12927 | 'Bcar1'  | 5.49  | 10.4  | 5.63 | 21   | 2.56 | 0     | 3.8  | 9.45  | 0     | 11.21   |
| 12928 | 'Crk'    | 7.74  | 4.49  | 4.26 | 10.5 | 7.83 | 8.25  | 13.9 | 4.53  | 9.37  | 11.25   |
| 12929 | 'Crkl'   | 10.69 | 13.43 | 25.5 | 12.7 | 10.9 | 11.94 | 26.2 | 11.1  | 10.73 | 27.23   |

|       |           |       |       |      |      |      |       |      |       |       |         |
|-------|-----------|-------|-------|------|------|------|-------|------|-------|-------|---------|
| 12931 | 'Crif1'   | 0     | 0     | 3.05 | 0    | 0    | 0     | 0    | 0     | 0     | 0       |
| 12933 | 'Crmp1'   | 70.36 | 75.43 | 63.3 | 114  | 65.7 | 29.67 | 79.3 | 61.94 | 41.11 | 34.94   |
| 12934 | 'Dpysl2'  | 627.7 | 545.7 | 406  | 365  | 599  | 571   | 369  | 566.1 | 478.2 | 540.46  |
| 12936 | 'Pcdha4'  | 0.68  | 0.23  | 2.31 | 0.1  | 0    | 0     | 2.93 | 1.38  | 1.69  | 0.35    |
| 12937 | 'Pcdha6'  | 0     | 0.12  | 0.26 | 0    | 0.22 | 0     | 0    | 0     | 1.37  | 0       |
| 12939 | 'Pcdha7'  | 2.39  | 0.26  | 0    | 0    | 0    | 1.11  | 0    | 0.23  | 0     | 0       |
| 12941 | 'Pcdha5'  | 0.38  | 1.77  | 0.03 | 0    | 4.59 | 0.24  | 11.3 | 1.13  | 1.55  | 1.61    |
| 12942 | 'Pcdha11' | 1.82  | 1.4   | 1.08 | 0    | 8.93 | 0.37  | 0.84 | 0.96  | 5.2   | 1.08    |
| 12943 | 'Pcdha10' | 0.87  | 1.85  | 1.34 | 0    | 2.03 | 0.36  | 0    | 0.03  | 2.8   | 3.3     |
| 12946 | 'Cr1l'    | 18.23 | 19.2  | 29.6 | 23.3 | 8.03 | 15.12 | 20.5 | 13.29 | 12.8  | 27.62   |
| 12950 | 'Hapln1'  | 0     | 0     | 0.94 | 0.01 | 0    | 1.41  | 0    | 0     | 0     | 0       |
| 12951 | 'Crx'     | 0.06  | 0.09  | 0.16 | 0.2  | 0.07 | 0.08  | 0.1  | 0.04  | 0.12  | 0.04    |
| 12952 | 'Cry1'    | 9.78  | 11.36 | 12.6 | 20   | 11.4 | 1.83  | 25.8 | 18    | 12.55 | 5.16    |
| 12953 | 'Cry2'    | 26.1  | 32.81 | 41.4 | 44.3 | 16.2 | 14.56 | 44.1 | 27.76 | 15.96 | 10.81   |
| 12955 | 'Cryab'   | 62.5  | 100.6 | 54.8 | 31.1 | 161  | 222   | 73.7 | 38.86 | 19.04 | 22.69   |
| 12959 | 'Cryba4'  | 0     | 0     | 4.2  | 0    | 0    | 0     | 0    | 0     | 0     | 0       |
| 12960 | 'Crybb1'  | 0     | 2.81  | 1.89 | 0    | 4.46 | 0.22  | 3.94 | 0     | 0     | 8.53    |
| 12962 | 'Crybb3'  | 0.06  | 6.6   | 0.1  | 2.3  | 0    | 0.33  | 0    | 1.33  | 0.06  | 0       |
| 12964 | 'Cryga'   | 1.17  | 0     | 0    | 0    | 0    | 0     | 0    | 0     | 0     | 2.95    |
| 12971 | 'Crym'    | 8.44  | 0     | 0    | 0    | 10   | 0     | 0    | 0     | 0     | 4.66    |
| 12972 | 'Cryz'    | 23.71 | 5.82  | 6.61 | 5.43 | 4.23 | 10.89 | 11.1 | 5.43  | 3.77  | 4.95    |
| 12974 | 'Cs'      | 89.21 | 88.36 | 114  | 55.7 | 67.1 | 79.12 | 94   | 134.3 | 92.41 | 59.71   |
| 12977 | 'Csf1'    | 5.75  | 1.81  | 2.73 | 1.46 | 1.46 | 1.24  | 5.4  | 1.2   | 0.08  | 2.01    |
| 12978 | 'Csf1r'   | 0.47  | 0.17  | 1.15 | 0    | 4.08 | 61.79 | 8.84 | 1.66  | 1.89  | 2.3     |
| 12982 | 'Csf2ra'  | 6.84  | 12.01 | 10.9 | 8.42 | 9.28 | 3.34  | 0.62 | 1.94  | 5.3   | 20.77   |
| 12983 | 'Csf2rb'  | 0     | 0     | 0.01 | 0    | 0    | 0     | 0    | 0     | 0     | 0       |
| 12984 | 'Csf2rb2' | 0.01  | 0     | 0.01 | 0.08 | 0.03 | 0.01  | 0.01 | 0.01  | 0.01  | 0.04    |
| 12985 | 'Csf3'    | 0     | 0     | 0    | 6.73 | 0    | 0     | 0    | 0     | 0     | 0       |
| 12986 | 'Csf3r'   | 2.96  | 0.68  | 0.77 | 1.26 | 3.29 | 8.63  | 0.37 | 0.23  | 0.74  | 0.66    |
| 12988 | 'Csk'     | 0.25  | 6.24  | 4.57 | 2.68 | 1.66 | 1.84  | 5.35 | 2.96  | 0.02  | 0.8     |
| 12995 | 'Csnk2a1' | 68.49 | 61.07 | 52.3 | 39.3 | 62.8 | 46.16 | 29.9 | 60.79 | 58.03 | 54.85   |
| 13000 | 'Csnk2a2' | 1.44  | 0.44  | 5.02 | 6.56 | 2.55 | 4.1   | 1.63 | 0.29  | 4.48  | 6.22    |
| 13001 | 'Csnk2b'  | 133.3 | 101.1 | 164  | 185  | 66.8 | 113.6 | 81.8 | 110.8 | 94.99 | 64.41   |
| 13002 | 'Dnajc5'  | 91.96 | 73.38 | 114  | 51.7 | 63.1 | 45.14 | 128  | 102.3 | 111.1 | 81.89   |
| 13003 | 'Vcan'    | 0.02  | 1.53  | 4.76 | 2.94 | 2.5  | 0.14  | 9.21 | 0.76  | 0     | 2.7     |
| 13004 | 'Ncan'    | 20.95 | 33.23 | 37.9 | 37.2 | 16.9 | 18.82 | 23.2 | 27.86 | 23.26 | 17.16   |
| 13006 | 'Smc3'    | 19.56 | 31.97 | 16.5 | 13.9 | 28.6 | 23.04 | 22.4 | 14.86 | 19.91 | 23.53   |
| 13007 | 'Csrp1'   | 13.25 | 8.6   | 2.35 | 29.7 | 3.41 | 14.98 | 9.62 | 15.06 | 4.73  | 9.55    |
| 13008 | 'Csrp2'   | 12.02 | 22.52 | 11.9 | 40.6 | 15.4 | 0.05  | 13.2 | 13.94 | 5.98  | 2.57    |
| 13009 | 'Csrp3'   | 1.75  | 0.28  | 5.43 | 0.8  | 1.14 | 1.71  | 1.81 | 3     | 1.21  | 4.68    |
| 13010 | 'Cst3'    | 2944  | 2478  | 1784 | 3554 | 1719 | 5485  | 1948 | 1576  | 2321  | 2494.52 |
| 13011 | 'Cst7'    | 0     | 0     | 0    | 0    | 0    | 0     | 0.16 | 0     | 0     | 0       |
| 13013 | 'Cst9'    | 0     | 0     | 0    | 0    | 0    | 0     | 15.4 | 0     | 0     | 0       |
| 13014 | 'Cstb'    | 103.8 | 102.7 | 140  | 251  | 104  | 185.8 | 165  | 83.27 | 154.7 | 168.42  |
| 13016 | 'Ctbp1'   | 20.44 | 22.64 | 9.44 | 21.1 | 21   | 23.02 | 52.9 | 19.67 | 24.2  | 23.48   |
| 13017 | 'Ctbp2'   | 6.78  | 9.39  | 2.08 | 13.4 | 4.74 | 10.19 | 3.37 | 6.67  | 7.01  | 8.85    |
| 13018 | 'Ctcf'    | 3.52  | 4.11  | 1.67 | 7.3  | 6.06 | 2.48  | 10.1 | 4.11  | 0.23  | 1.19    |
| 13024 | 'Ctla2a'  | 6.57  | 5.28  | 7.19 | 9.84 | 10.4 | 6.5   | 6.17 | 3.7   | 9.36  | 4.67    |
| 13025 | 'Ctla2b'  | 0     | 0     | 0    | 12.5 | 0    | 0     | 0    | 0     | 0     | 0       |
| 13026 | 'Pcyt1a'  | 2.83  | 3.97  | 6.27 | 4.18 | 4.16 | 0.35  | 2.84 | 2.09  | 5.24  | 1.41    |
| 13030 | 'Ctsb'    | 591.5 | 587.5 | 695  | 501  | 616  | 737.8 | 696  | 573.9 | 779.5 | 679.88  |
| 13032 | 'Ctsc'    | 3.7   | 0     | 0    | 0    | 3.05 | 2.29  | 0.01 | 0     | 1.79  | 0.08    |
| 13033 | 'Ctsd'    | 268.5 | 350.1 | 403  | 258  | 296  | 699.5 | 294  | 354.4 | 438.3 | 513.94  |
| 13036 | 'Ctsh'    | 0.35  | 4.87  | 4.19 | 0.04 | 11.9 | 3.47  | 10.2 | 0.38  | 0.36  | 4.64    |
| 13038 | 'Ctsk'    | 0.22  | 1.93  | 0    | 0    | 3.83 | 0.22  | 0    | 1.59  | 0     | 0       |
| 13039 | 'Ctsl'    | 142.2 | 127.2 | 108  | 173  | 149  | 186.9 | 129  | 128.7 | 201.3 | 174.24  |
| 13040 | 'Ctss'    | 25.14 | 22.83 | 13.5 | 69.3 | 62.3 | 445.6 | 45   | 12.1  | 17.63 | 14.98   |
| 13041 | 'Ctsw'    | 0     | 0     | 1.05 | 0    | 0    | 0     | 0    | 0     | 3.91  | 0       |

|       |           |       |       |      |      |      |       |      |       |       |        |
|-------|-----------|-------|-------|------|------|------|-------|------|-------|-------|--------|
| 13043 | 'Cttn'    | 54.05 | 55.97 | 66.4 | 85.3 | 61.5 | 59.04 | 75.6 | 69.71 | 73.71 | 74.1   |
| 13046 | 'Celf1'   | 11    | 9.74  | 9.37 | 11   | 11.3 | 2.02  | 6.85 | 7.39  | 9.57  | 6.26   |
| 13047 | 'Cux1'    | 13.37 | 4.85  | 3.93 | 11.6 | 10   | 9.8   | 12.8 | 2.31  | 25.66 | 8.02   |
| 13048 | 'Cux2'    | 6.03  | 2.81  | 7.76 | 7.56 | 6.09 | 5.33  | 14.1 | 5.87  | 10.16 | 4.66   |
| 13051 | 'Cx3cr1'  | 0     | 2.01  | 0.03 | 0    | 0.21 | 17.12 | 11   | 0     | 2.73  | 1.6    |
| 13052 | 'Cxadr'   | 0.52  | 0     | 5.71 | 4.42 | 0.1  | 4.62  | 8.89 | 1.02  | 1.6   | 1.35   |
| 13056 | 'Cyb561'  | 85.87 | 107.7 | 95.3 | 85.1 | 93.9 | 105.5 | 100  | 72.95 | 129.1 | 195.54 |
| 13057 | 'Cyba'    | 4.83  | 6.9   | 11.6 | 22.3 | 0.08 | 10.67 | 0    | 4.49  | 0     | 0.12   |
| 13058 | 'Cybb'    | 0     | 0     | 0    | 0    | 0    | 0     | 0    | 0     | 0     | 0.03   |
| 13063 | 'Cycs'    | 128.4 | 119.8 | 142  | 147  | 158  | 144.6 | 113  | 150.6 | 139.4 | 144.16 |
| 13067 | 'Cyct'    | 0     | 0     | 0    | 11.5 | 0    | 0     | 0    | 0     | 0     | 0      |
| 13070 | 'Cyp11a1' | 1.82  | 0.38  | 0    | 0    | 4.95 | 0.33  | 0    | 3.84  | 0     | 0.15   |
| 13075 | 'Cyp19a1' | 0.02  | 4.87  | 0    | 0.17 | 0    | 0.2   | 0.02 | 0.03  | 0     | 0      |
| 13076 | 'Cyp1a1'  | 0     | 0     | 0.41 | 0    | 0    | 0     | 0    | 0     | 0     | 0      |
| 13078 | 'Cyp1b1'  | 0     | 1     | 0    | 0    | 0    | 0     | 0.09 | 0     | 0     | 0      |
| 13079 | 'Cyp21a1' | 0     | 0     | 0    | 4.25 | 0    | 0.02  | 0    | 0     | 0     | 0      |
| 13087 | 'Cyp2a5'  | 0     | 2     | 0    | 0    | 0    | 0     | 0    | 0.02  | 0     | 0.13   |
| 13089 | 'Cyp2b13' | 0     | 0     | 0    | 0    | 4.31 | 0     | 0    | 0     | 0     | 0      |
| 13090 | 'Cyp2b19' | 0     | 0     | 0    | 0    | 0    | 0.36  | 0    | 0     | 0.16  | 0      |
| 13101 | 'Cyp2d10' | 0.06  | 0     | 0    | 0    | 0    | 0     | 0    | 0     | 0     | 0      |
| 13105 | 'Cyp2d9'  | 0.11  | 0     | 0    | 0    | 0    | 0     | 0    | 0     | 0     | 0      |
| 13106 | 'Cyp2e1'  | 0.4   | 0.38  | 0.92 | 0.83 | 0.84 | 1.02  | 0.89 | 0.32  | 0.37  | 0.41   |
| 13109 | 'Cyp2j5'  | 0     | 0     | 0    | 0.03 | 0    | 0.01  | 0    | 0     | 0     | 0      |
| 13110 | 'Cyp2j6'  | 3.49  | 5.95  | 3.41 | 7.13 | 0.07 | 5.64  | 11   | 2.1   | 0.04  | 1.48   |
| 13116 | 'Cyp46a1' | 73.05 | 71.3  | 117  | 53.4 | 98.5 | 131   | 131  | 125.7 | 96.42 | 78.74  |
| 13120 | 'Cyp4b1'  | 0     | 0     | 0    | 0    | 0    | 0.02  | 0    | 0     | 0.02  | 0      |
| 13121 | 'Cyp51'   | 26.86 | 11.1  | 30   | 30.4 | 10.9 | 21.96 | 15.8 | 30.25 | 17.51 | 34.43  |
| 13122 | 'Cyp7a1'  | 0     | 0.19  | 0    | 0    | 0    | 0     | 0    | 0     | 0     | 0      |
| 13123 | 'Cyp7b1'  | 1.38  | 2.08  | 0    | 0    | 3.91 | 5.01  | 1.64 | 1.42  | 4.86  | 5.4    |
| 13131 | 'Dab1'    | 29.61 | 12.73 | 36.5 | 20.8 | 14.3 | 12.6  | 18   | 10.48 | 13.72 | 14.85  |
| 13132 | 'Dab2'    | 4.14  | 1.91  | 3.43 | 0.13 | 0    | 0.38  | 2.42 | 0.77  | 2.04  | 0      |
| 13134 | 'Dach1'   | 0.44  | 0     | 0    | 0    | 0    | 0     | 0    | 0     | 0.12  | 1.27   |
| 13135 | 'Dad1'    | 458.1 | 465.3 | 326  | 632  | 333  | 389.3 | 357  | 444.8 | 355.2 | 488.76 |
| 13136 | 'Cd55'    | 5.44  | 3.49  | 3.28 | 1    | 4.64 | 12.73 | 0.25 | 13.26 | 10.3  | 12.11  |
| 13138 | 'Dag1'    | 9.97  | 2.27  | 12.8 | 2.95 | 4.53 | 1.8   | 4.44 | 3.17  | 7.27  | 2.59   |
| 13139 | 'Dgka'    | 3.36  | 6.37  | 8.11 | 0.02 | 3.75 | 9.5   | 0    | 5.11  | 3.81  | 16.06  |
| 13142 | 'Dao'     | 0     | 0.19  | 0    | 0    | 0    | 2.78  | 0    | 0     | 0     | 0      |
| 13143 | 'Dapk2'   | 0     | 0     | 0    | 0    | 3.56 | 0     | 0.04 | 0     | 0     | 0      |
| 13144 | 'Dapk3'   | 4.45  | 4.93  | 3.3  | 14.4 | 4.29 | 0.93  | 3.3  | 0.13  | 1.01  | 0.42   |
| 13163 | 'Daxx'    | 21.38 | 3.83  | 12.1 | 13.9 | 13.2 | 4.41  | 38.4 | 15.08 | 10.38 | 20.32  |
| 13164 | 'Dazl'    | 0     | 0     | 0    | 0    | 0    | 0     | 0    | 0.6   | 0     | 0      |
| 13166 | 'Dbh'     | 1.96  | 0     | 0.02 | 0    | 1.03 | 0     | 0    | 0     | 0     | 7.89   |
| 13167 | 'Dbi'     | 442.4 | 302.4 | 503  | 353  | 378  | 570   | 434  | 248.6 | 254.2 | 213.18 |
| 13168 | 'Dbil5'   | 0     | 1.46  | 0.91 | 0    | 2.14 | 0     | 0    | 0     | 2.14  | 1.06   |
| 13169 | 'Dbnl'    | 81.61 | 93.35 | 60.7 | 38.5 | 67.1 | 80.54 | 87.5 | 69.68 | 113.4 | 77.28  |
| 13170 | 'Dbp'     | 7.57  | 4.16  | 1.59 | 25.8 | 17.5 | 16.53 | 18.4 | 15.39 | 6.93  | 15.55  |
| 13171 | 'Dbt'     | 4.49  | 4.91  | 8.98 | 7.59 | 0    | 3.04  | 1.89 | 0.73  | 4.94  | 5.96   |
| 13175 | 'Dclk1'   | 29.3  | 29.23 | 33.5 | 20.4 | 30.4 | 27.3  | 31.2 | 26.42 | 38.37 | 22.67  |
| 13176 | 'Dcc'     | 1.41  | 1.09  | 3.16 | 0.86 | 2.31 | 0.13  | 0.83 | 2.11  | 0.67  | 3.36   |
| 13177 | 'Eci1'    | 26.29 | 20.68 | 19.1 | 4.37 | 30.3 | 41.26 | 26.5 | 17.48 | 12.6  | 9.12   |
| 13178 | 'Dck'     | 16.7  | 17.31 | 9.46 | 0    | 5.63 | 10.04 | 4.13 | 16.02 | 7.05  | 8.56   |
| 13179 | 'Dcn'     | 0     | 0     | 0    | 0    | 3.04 | 0     | 0    | 0     | 0     | 0      |
| 13180 | 'Pcbd1'   | 222.6 | 150   | 203  | 224  | 151  | 210.2 | 49.4 | 227.1 | 132.5 | 242.29 |
| 13185 | 'Vps26c'  | 38.45 | 30.3  | 30   | 44.6 | 30.6 | 51.66 | 59   | 60.94 | 30.1  | 36.93  |
| 13190 | 'Dct'     | 0     | 0     | 0.02 | 0    | 8.89 | 2.13  | 3.55 | 0     | 0     | 0      |
| 13191 | 'Dctn1'   | 89.92 | 80.91 | 108  | 33   | 76.3 | 61.17 | 120  | 70.93 | 102.4 | 86.08  |
| 13193 | 'Dcx'     | 2.7   | 1.09  | 1.22 | 1.16 | 2.22 | 1.46  | 1.44 | 0.5   | 1.15  | 1.1    |
| 13194 | 'Ddb1'    | 52.43 | 47.14 | 89.7 | 24.1 | 35.8 | 19.28 | 67.2 | 40.33 | 83.99 | 80.54  |

|       |            |       |       |      |      |      |       |      |       |       |        |
|-------|------------|-------|-------|------|------|------|-------|------|-------|-------|--------|
| 13195 | 'Ddc'      | 117.7 | 81.17 | 29.8 | 94.9 | 31.2 | 12.03 | 4.26 | 12.82 | 16.34 | 7.03   |
| 13196 | 'Asap1'    | 5.59  | 3.94  | 7.57 | 5.71 | 9.15 | 2.19  | 9.84 | 4.5   | 7.45  | 6.85   |
| 13197 | 'Gadd45a'  | 4.91  | 11.64 | 6.47 | 12.8 | 6.58 | 7.43  | 4.56 | 4.87  | 4.49  | 3.5    |
| 13198 | 'Ddit3'    | 24.85 | 27.43 | 48.7 | 39.5 | 58.9 | 86.25 | 55.4 | 25.88 | 90.38 | 89.98  |
| 13199 | 'Ddn'      | 0.67  | 0.86  | 1.05 | 1.73 | 4.38 | 0.92  | 0.01 | 0.57  | 0     | 0      |
| 13200 | 'Ddost'    | 138.7 | 274.6 | 195  | 206  | 155  | 195.2 | 147  | 188.9 | 263.6 | 263.16 |
| 13202 | 'Ddt'      | 86.14 | 58.82 | 60.4 | 26.1 | 62.3 | 73.89 | 64.5 | 58.31 | 121.5 | 74.89  |
| 13204 | 'Dhx15'    | 24.76 | 16.31 | 20.8 | 13.1 | 14.8 | 5.34  | 24.8 | 14.75 | 13.45 | 30.98  |
| 13205 | 'Ddx3x'    | 22.4  | 12.64 | 31.7 | 45.8 | 12.1 | 9.69  | 16.7 | 14.03 | 16.86 | 10.06  |
| 13206 | 'Ddx4'     | 0     | 2.27  | 2.77 | 0    | 0    | 0     | 0    | 0     | 0     | 0.02   |
| 13207 | 'Ddx5'     | 388.9 | 512.4 | 356  | 534  | 278  | 160.8 | 412  | 320.6 | 261.4 | 448.03 |
| 13209 | 'Ddx6'     | 29.66 | 21.53 | 22.3 | 11   | 41.4 | 29.37 | 30.8 | 38.14 | 17.23 | 26.17  |
| 13211 | 'Dhx9'     | 7.31  | 5.7   | 5.37 | 5.11 | 10.4 | 6.82  | 2.17 | 4.78  | 2.42  | 3.72   |
| 13214 | 'Defb1'    | 0     | 0     | 0    | 0    | 0    | 0     | 35.1 | 0     | 0     | 0      |
| 13218 | 'Defa29'   | 0     | 0     | 0    | 0    | 0    | 0     | 6.37 | 4.07  | 0     | 0      |
| 13237 | 'Defa3'    | 0     | 0     | 0.13 | 0    | 0    | 0     | 0    | 0     | 0     | 0      |
| 13244 | 'Degs1'    | 106.7 | 70.73 | 50.3 | 39.9 | 63.8 | 98.39 | 92.8 | 103   | 76.35 | 109.55 |
| 13340 | 'Slc29a2'  | 5.48  | 2.44  | 7.3  | 8.73 | 1.85 | 9.74  | 3.47 | 8.08  | 19.09 | 5.99   |
| 13345 | 'Twist2'   | 0     | 6.85  | 0    | 0    | 0.75 | 5.27  | 0    | 0     | 2.85  | 0      |
| 13346 | 'Des'      | 0.1   | 0     | 0.22 | 0    | 0.05 | 0.03  | 0    | 0.05  | 0.07  | 0.04   |
| 13347 | 'Dffa'     | 4.17  | 7.92  | 24   | 18.3 | 9.07 | 10.33 | 5.69 | 15.2  | 14.54 | 14.37  |
| 13349 | 'Ackr1'    | 7.36  | 0.17  | 0.6  | 8.36 | 13   | 0.2   | 21.7 | 4.09  | 9.46  | 10.83  |
| 13350 | 'Dgat1'    | 7.99  | 20.33 | 26.9 | 4.77 | 20.2 | 2.75  | 29.3 | 14.03 | 18.01 | 2.94   |
| 13353 | 'Dgcr6'    | 63.73 | 97.21 | 50.6 | 51   | 89.5 | 126.5 | 62.1 | 87.34 | 90.3  | 80.53  |
| 13356 | 'Dgcr2'    | 91.69 | 103.1 | 127  | 72.5 | 71.8 | 115   | 117  | 105.8 | 111.7 | 100.05 |
| 13358 | 'Slc25a1'  | 80.25 | 92.83 | 90.4 | 74.2 | 75.3 | 98.25 | 113  | 45.45 | 87.72 | 78.39  |
| 13360 | 'Dhcr7'    | 18.94 | 28.31 | 44.5 | 18.3 | 13.7 | 33.59 | 23.5 | 23.04 | 20.85 | 14.57  |
| 13361 | 'Dhfr'     | 0.66  | 0.51  | 0.01 | 0    | 1.05 | 2.39  | 0    | 0.83  | 1.4   | 0      |
| 13363 | 'Dhh'      | 0     | 0     | 0    | 0    | 0.42 | 0     | 0    | 0     | 0     | 0      |
| 13367 | 'Diaph1'   | 1.9   | 4.57  | 2.5  | 1.51 | 0.58 | 3.59  | 3.28 | 2.36  | 2.12  | 3.62   |
| 13368 | 'Dffb'     | 0.27  | 12.25 | 2.47 | 22.1 | 0    | 4.75  | 9.18 | 3.89  | 11.68 | 1.01   |
| 13370 | 'Dio1'     | 0     | 0     | 0    | 0    | 0    | 0     | 0    | 0.05  | 0     | 0      |
| 13371 | 'Dio2'     | 0.17  | 0.01  | 0    | 1.42 | 0    | 0     | 0    | 0     | 0     | 0.98   |
| 13382 | 'Dld'      | 33.91 | 76.19 | 32.4 | 43.4 | 34.4 | 51.75 | 24.7 | 59.74 | 38.45 | 44.67  |
| 13383 | 'Dlg1'     | 11.32 | 12.41 | 18.7 | 17.8 | 8.31 | 4.49  | 10.6 | 7.66  | 9.62  | 13.62  |
| 13384 | 'Mpp3'     | 8.59  | 22.41 | 19.7 | 9.66 | 10.7 | 17.11 | 31.2 | 18.07 | 34.88 | 43.8   |
| 13385 | 'Dlg4'     | 14.51 | 9.38  | 6.88 | 5.36 | 16   | 10.58 | 3.9  | 10.72 | 25.36 | 21.82  |
| 13386 | 'Dlk1'     | 20.92 | 18.49 | 0.33 | 6.22 | 30.6 | 29.39 | 8.24 | 12.46 | 18.49 | 51.22  |
| 13388 | 'Dil1'     | 3.97  | 2.05  | 10.5 | 3.59 | 0    | 0.45  | 7.21 | 0     | 6.07  | 4.72   |
| 13389 | 'Dil3'     | 0.33  | 1.46  | 4.71 | 0    | 0    | 1.29  | 5.83 | 2.44  | 1.01  | 4.31   |
| 13390 | 'Dlx1'     | 46.03 | 20.55 | 20.3 | 31.5 | 0.95 | 4.18  | 6.09 | 39.83 | 15.26 | 1.85   |
| 13392 | 'Dlx2'     | 19.95 | 7.29  | 8.21 | 5.13 | 0.02 | 0.11  | 0.5  | 3.85  | 4.02  | 0      |
| 13393 | 'Dlx3'     | 0     | 0     | 0    | 0    | 0.11 | 0     | 0    | 0     | 0     | 0      |
| 13394 | 'Dlx4'     | 0     | 0     | 0    | 0    | 2.09 | 0     | 0    | 0     | 0     | 0.16   |
| 13395 | 'Dlx5'     | 15.76 | 13.57 | 6.06 | 7.56 | 53.3 | 18.89 | 0.13 | 20.23 | 23.87 | 0      |
| 13396 | 'Dlx6'     | 17.79 | 9.66  | 9.26 | 7.93 | 16.3 | 12.32 | 2.6  | 20    | 14.97 | 0.74   |
| 13400 | 'Dmpk'     | 1.23  | 2.53  | 1.83 | 8.5  | 1.54 | 2.65  | 2.03 | 1.03  | 0     | 2.39   |
| 13401 | 'Dmwd'     | 17.63 | 8.23  | 10.6 | 10.8 | 8.36 | 13.23 | 10.1 | 8.81  | 2.32  | 10.96  |
| 13405 | 'Dmd'      | 6.07  | 11.21 | 3.23 | 11.9 | 12.5 | 21.67 | 11   | 9.39  | 13.18 | 12.16  |
| 13411 | 'Dnah11'   | 1.95  | 0     | 0.3  | 0    | 0    | 0     | 0    | 0     | 0     | 0      |
| 13417 | 'Dnah8'    | 0.28  | 1.12  | 0    | 0    | 0    | 0     | 0.23 | 0     | 0     | 0.21   |
| 13418 | 'Dnajc1'   | 2.94  | 2.41  | 3.57 | 3.91 | 2.84 | 0.34  | 8.5  | 3.75  | 4.12  | 3.02   |
| 13419 | 'Dnase1'   | 0.57  | 0.79  | 0.61 | 0.82 | 1.69 | 0     | 0.52 | 0.26  | 0.1   | 0.58   |
| 13421 | 'Dnase1l3' | 1.36  | 0     | 2    | 0    | 0    | 0     | 0    | 0     | 0     | 1.52   |
| 13423 | 'Dnase2a'  | 0.46  | 0     | 0    | 0.04 | 0    | 4.49  | 0    | 0     | 0     | 0.05   |
| 13424 | 'Dync1h1'  | 7     | 4.86  | 9.17 | 9.07 | 7.82 | 7.1   | 13.2 | 5.12  | 7.26  | 7.91   |
| 13426 | 'Dync1i1'  | 167.3 | 143   | 137  | 106  | 106  | 76.72 | 57   | 202.9 | 116.8 | 97.94  |
| 13427 | 'Dync1i2'  | 78.73 | 84.13 | 61.6 | 103  | 54.4 | 81.97 | 120  | 84.01 | 97.2  | 101.82 |



|       |           |       |       |      |      |      |       |      |       |       |        |
|-------|-----------|-------|-------|------|------|------|-------|------|-------|-------|--------|
| 13429 | 'Dnm1'    | 41.35 | 35.97 | 38.5 | 10.2 | 56.2 | 50.83 | 59.3 | 42.15 | 36.76 | 33.77  |
| 13430 | 'Dnm2'    | 18.1  | 16.08 | 23.9 | 13.9 | 32.9 | 8.17  | 9.07 | 15.79 | 23.98 | 17.05  |
| 13433 | 'Dnmt1'   | 6.85  | 12.65 | 14.6 | 3.93 | 2.53 | 5.15  | 8.15 | 6.12  | 15.93 | 21.21  |
| 13434 | 'Trdmt1'  | 0.51  | 2.31  | 0.04 | 6.67 | 5.36 | 0.03  | 0    | 2.51  | 3.47  | 8.65   |
| 13435 | 'Dnmt3a'  | 4.68  | 5.32  | 5.92 | 3.85 | 8.94 | 2.26  | 3.11 | 3.65  | 4.37  | 1.36   |
| 13437 | 'Dnpep'   | 36.39 | 58.43 | 29   | 21.8 | 72.9 | 60.26 | 39.1 | 72.39 | 69.06 | 66.59  |
| 13445 | 'Cdk2ap1' | 21.66 | 14.96 | 18.5 | 24.8 | 26.5 | 13.26 | 23   | 11.29 | 17.55 | 22.21  |
| 13446 | 'Doc2a'   | 19.05 | 14.66 | 6.89 | 11.1 | 13.8 | 11.64 | 18.9 | 12.22 | 7.67  | 4.53   |
| 13447 | 'Doc2b'   | 1.4   | 2.59  | 1.16 | 7.42 | 2.63 | 1.61  | 0.98 | 0.61  | 1.33  | 0.74   |
| 13449 | 'Dok2'    | 0.05  | 0     | 0.04 | 0.06 | 1.79 | 0     | 0.2  | 1.12  | 0     | 0      |
| 13476 | 'Reep5'   | 239.5 | 199.6 | 180  | 163  | 204  | 204.7 | 236  | 148.9 | 154.8 | 218.96 |
| 13478 | 'Dpagt1'  | 11.15 | 21.53 | 22.3 | 0.5  | 25.6 | 6.69  | 16.6 | 9.97  | 15.46 | 20.75  |
| 13480 | 'Dpm1'    | 28.73 | 28.5  | 22   | 50.8 | 32.7 | 28.12 | 35.3 | 30.32 | 40.79 | 37.29  |
| 13481 | 'Dpm2'    | 88.25 | 125.5 | 50.9 | 126  | 130  | 115.8 | 93.6 | 86.84 | 96.31 | 90.67  |
| 13482 | 'Dpp4'    | 0.15  | 0.4   | 0.46 | 0.89 | 0.36 | 1.15  | 0.17 | 0.31  | 0.96  | 0.24   |
| 13483 | 'Dpp6'    | 114.7 | 62.54 | 102  | 84.6 | 96.7 | 61.18 | 106  | 106.5 | 88.11 | 124.99 |
| 13486 | 'Dr1'     | 7.64  | 2.32  | 10.6 | 10.7 | 8.69 | 4.04  | 2.72 | 10.72 | 6.62  | 4.8    |
| 13488 | 'Drd1'    | 0.07  | 0     | 0.01 | 0    | 2.36 | 0     | 0    | 0     | 0     | 4.17   |
| 13489 | 'Drd2'    | 3.03  | 0     | 5.18 | 0    | 0    | 0     | 0.02 | 0     | 0.26  | 1.03   |
| 13490 | 'Drd3'    | 36.3  | 0     | 64   | 0    | 40.5 | 190.2 | 0    | 114.3 | 154.3 | 267.35 |
| 13492 | 'Drd5'    | 0     | 0.76  | 1.6  | 0.77 | 5.84 | 5.69  | 0    | 0     | 8.13  | 2.25   |
| 13494 | 'Drg1'    | 183.2 | 133.7 | 142  | 208  | 113  | 131.8 | 147  | 180.4 | 115.5 | 182.09 |
| 13495 | 'Drg2'    | 85    | 78.47 | 106  | 152  | 44.3 | 96.98 | 69.1 | 83.73 | 87.76 | 44.8   |
| 13496 | 'Arid3a'  | 0.17  | 0.81  | 0.04 | 0    | 0.87 | 0.03  | 0    | 0.68  | 0.15  | 0.07   |
| 13497 | 'Drp2'    | 14.2  | 4.8   | 2.25 | 0.01 | 1.45 | 0.34  | 2.09 | 5.58  | 2.75  | 0.95   |
| 13498 | 'Atn1'    | 7.99  | 7.19  | 13.8 | 5.98 | 10.7 | 9.13  | 10.8 | 5.8   | 12.64 | 8.47   |
| 13506 | 'Dsc2'    | 1.7   | 2.62  | 0.08 | 0    | 0.78 | 0.07  | 0    | 1.94  | 0.01  | 0.01   |
| 13508 | 'Dscam'   | 3.04  | 1.41  | 6.26 | 3.1  | 5.72 | 1.43  | 9.15 | 3.82  | 6.36  | 3.3    |
| 13511 | 'Dsg2'    | 0     | 0     | 0    | 3.42 | 0.64 | 0     | 0.02 | 0.37  | 0     | 0.01   |
| 13518 | 'Dst'     | 5.93  | 3.4   | 7.96 | 8.36 | 6.59 | 5.86  | 8.32 | 3.09  | 8.69  | 7.57   |
| 13521 | 'Slc26a2' | 0.07  | 1.13  | 0    | 3.86 | 0.01 | 0.57  | 0    | 0.61  | 0.02  | 2.72   |
| 13522 | 'Adam28'  | 0.27  | 0.21  | 0.46 | 0.76 | 0.31 | 0.26  | 0.25 | 0.21  | 0.31  | 0.24   |
| 13524 | 'Adam18'  | 0     | 0     | 0    | 0    | 0    | 0     | 0.91 | 0     | 0     | 0      |
| 13527 | 'Dtna'    | 10.82 | 7.51  | 14   | 4.89 | 10.5 | 8.01  | 28.6 | 8.72  | 6.6   | 15.84  |
| 13528 | 'Dtnb'    | 12.22 | 13.16 | 16.2 | 4.43 | 14.6 | 10.86 | 20.8 | 5.38  | 21.5  | 13.01  |
| 13531 | 'Usp17la' | 0.08  | 0.05  | 0.02 | 0.19 | 0.12 | 0.05  | 0.11 | 0.03  | 0.03  | 0.06   |
| 13537 | 'Dusp2'   | 0     | 0     | 2.64 | 5.94 | 1.2  | 0     | 0    | 0     | 0     | 0      |
| 13542 | 'Dvl1'    | 3.49  | 4.15  | 2.28 | 6.61 | 9.85 | 7.47  | 6.94 | 9.43  | 7.61  | 10.33  |
| 13543 | 'Dvl2'    | 2.36  | 0.39  | 1.66 | 0.33 | 1.01 | 1.25  | 1.69 | 0.82  | 5.9   | 0.95   |
| 13544 | 'Dvl3'    | 4.37  | 5.35  | 6.04 | 7.44 | 3.34 | 6.65  | 11.6 | 3.48  | 6.47  | 0.01   |
| 13548 | 'Dyrk1a'  | 8.89  | 10.7  | 7.34 | 12.1 | 8.06 | 3.32  | 8.29 | 7.2   | 7.28  | 7.35   |
| 13549 | 'Dyrk1b'  | 2.86  | 1.94  | 3.52 | 0.01 | 1.34 | 0.24  | 2.13 | 2.16  | 0.81  | 7.81   |
| 13555 | 'E2f1'    | 0     | 1.26  | 0    | 0    | 0    | 0.02  | 0.07 | 0     | 0     | 0      |
| 13557 | 'E2f3'    | 0.02  | 1.36  | 0.31 | 2.64 | 1.53 | 0.77  | 0.78 | 1.48  | 0     | 0.04   |
| 13559 | 'E2f5'    | 2.56  | 0.28  | 4.66 | 0.67 | 1.5  | 4.58  | 6.06 | 0.99  | 1.68  | 0.72   |
| 13560 | 'E4f1'    | 11.58 | 19.08 | 15.3 | 0.9  | 8.96 | 0.73  | 9.37 | 16.52 | 15.49 | 19.24  |
| 13589 | 'Mapre1'  | 17.46 | 20.59 | 16.1 | 25.6 | 23.2 | 10.44 | 22.2 | 16.78 | 20.98 | 20.37  |
| 13590 | 'Lefty1'  | 0     | 2.48  | 0.03 | 0    | 0    | 0     | 0    | 0     | 0     | 0      |
| 13591 | 'Ebf1'    | 0.02  | 31.04 | 1.76 | 3.82 | 2.15 | 0     | 7.83 | 0     | 2     | 0      |
| 13592 | 'Ebf2'    | 0     | 2.05  | 0.77 | 0    | 0.58 | 0     | 0.01 | 0.33  | 2.79  | 1.22   |
| 13593 | 'Ebf3'    | 0     | 0     | 0    | 0    | 0.97 | 0.87  | 0    | 0     | 0     | 0      |
| 13595 | 'Ebp'     | 15.68 | 17.92 | 5.5  | 0.03 | 22.7 | 27.02 | 16.2 | 24.96 | 37.96 | 16.91  |
| 13599 | 'Ecel1'   | 366.7 | 166.3 | 178  | 45.2 | 104  | 52.98 | 144  | 281.6 | 78.75 | 72.52  |
| 13601 | 'Ecm1'    | 0     | 3.25  | 0    | 0    | 0    | 5.46  | 0    | 0.02  | 2.45  | 0      |
| 13602 | 'Sparcl1' | 290.6 | 222.5 | 170  | 219  | 138  | 220.9 | 236  | 144.7 | 207.5 | 145.11 |
| 13603 | 'Opn3'    | 5.16  | 3.87  | 0.07 | 28.1 | 2.29 | 0.03  | 0.09 | 0.56  | 6.26  | 2.08   |
| 13605 | 'Ect2'    | 0     | 0     | 0    | 0    | 0    | 0     | 0    | 1.46  | 0     | 0      |
| 13607 | 'Eda'     | 0.71  | 0.07  | 0    | 0.03 | 0    | 0.01  | 0    | 0.12  | 0.74  | 0.78   |

|       |            |       |       |      |      |      |       |      |       |       |        |
|-------|------------|-------|-------|------|------|------|-------|------|-------|-------|--------|
| 13608 | 'Edar'     | 2.35  | 0     | 0    | 1.22 | 0    | 0     | 0    | 0     | 0     | 0      |
| 13609 | 'S1pr1'    | 28.64 | 21.3  | 2.59 | 24.2 | 6.96 | 22.28 | 10.1 | 15.87 | 40.7  | 0.93   |
| 13610 | 'S1pr3'    | 2.26  | 2.74  | 0    | 0.09 | 2.19 | 0     | 0.01 | 1.61  | 5.25  | 0      |
| 13611 | 'S1pr4'    | 0     | 0.3   | 1.32 | 0    | 0    | 0     | 0    | 0     | 0     | 0      |
| 13612 | 'Edil3'    | 21.46 | 15.05 | 56.9 | 28.6 | 28.8 | 7.17  | 19.8 | 20.76 | 73.6  | 56.54  |
| 13616 | 'Edn3'     | 0     | 0     | 0    | 0.02 | 1.36 | 0     | 0    | 0     | 0     | 1.68   |
| 13617 | 'Ednra'    | 0     | 0     | 0.01 | 0    | 0    | 0     | 0    | 0     | 0     | 0      |
| 13618 | 'Ednrb'    | 38.72 | 21.55 | 11.7 | 27.3 | 2.02 | 9.54  | 15.1 | 15.49 | 20.4  | 4.2    |
| 13619 | 'Phc1'     | 4.57  | 2.32  | 4.79 | 9.88 | 1.34 | 0.01  | 3.51 | 1.8   | 0.57  | 6.96   |
| 13626 | 'Eed'      | 3.4   | 2.16  | 3.6  | 20.2 | 0    | 7.51  | 3.21 | 2.01  | 3.08  | 1.24   |
| 13627 | 'Eef1a1'   | 645.6 | 840.5 | 714  | 819  | 563  | 644.5 | 671  | 475.1 | 359.4 | 430.89 |
| 13628 | 'Eef1a2'   | 10.04 | 3.81  | 4.38 | 0.14 | 4.05 | 3.42  | 5.09 | 6.76  | 7.07  | 3.19   |
| 13629 | 'Eef2'     | 72.9  | 76.94 | 81.1 | 79.7 | 91   | 76    | 65.4 | 65.98 | 63.3  | 75.96  |
| 13631 | 'Eef2k'    | 3.59  | 3.58  | 8.66 | 4.36 | 4.36 | 9.28  | 6.02 | 4.17  | 5.43  | 2.51   |
| 13636 | 'Efna1'    | 0     | 2.63  | 2.99 | 0    | 0    | 10.81 | 0    | 3.56  | 0     | 0      |
| 13637 | 'Efna2'    | 4.15  | 1.04  | 0.09 | 1.39 | 2.45 | 0     | 0    | 2.82  | 3.32  | 0.82   |
| 13638 | 'Efna3'    | 14.47 | 3.95  | 14.9 | 11.3 | 15.8 | 7.39  | 5.03 | 3.5   | 15.43 | 3.64   |
| 13639 | 'Efna4'    | 0     | 0     | 1.92 | 0    | 0    | 0     | 0    | 0     | 0     | 0      |
| 13640 | 'Efna5'    | 41.49 | 47.47 | 29.8 | 57.3 | 14.5 | 11.25 | 30.2 | 25.98 | 22.8  | 27.59  |
| 13641 | 'Efnb1'    | 1.24  | 0.31  | 2.59 | 0.23 | 2.26 | 0.55  | 0.47 | 2.79  | 2.92  | 1.43   |
| 13642 | 'Efnb2'    | 0.66  | 1.96  | 0.7  | 1.09 | 1.48 | 2.55  | 1.47 | 2.77  | 0     | 0.94   |
| 13643 | 'Efnb3'    | 64.05 | 88.45 | 96.9 | 33.2 | 88.2 | 67.82 | 91.4 | 45.34 | 87.53 | 51.58  |
| 13644 | 'Efs'      | 3.55  | 3.23  | 4.65 | 0    | 0    | 0     | 2.75 | 2.35  | 0.4   | 2.47   |
| 13645 | 'Egf'      | 0     | 1.96  | 0    | 10.4 | 1.96 | 0     | 0    | 1.34  | 0     | 0      |
| 13649 | 'Egfr'     | 0     | 0     | 0    | 0.34 | 0.04 | 4.68  | 0    | 0     | 0.11  | 0      |
| 13650 | 'Rhdbdf1'  | 2.23  | 0.58  | 1.44 | 0    | 1.47 | 5.15  | 3.79 | 0     | 0.13  | 0.76   |
| 13653 | 'Egr1'     | 111   | 232.8 | 223  | 292  | 38.5 | 452.9 | 194  | 94    | 28.15 | 190.09 |
| 13654 | 'Egr2'     | 4.81  | 3.69  | 2.22 | 19.7 | 0.21 | 2.39  | 0.02 | 0     | 0     | 0.2    |
| 13655 | 'Egr3'     | 0     | 2.36  | 0    | 3.54 | 0    | 0     | 0    | 1.17  | 0.04  | 0.02   |
| 13656 | 'Egr4'     | 0     | 1.33  | 1.05 | 20.1 | 0    | 2.98  | 5.91 | 0     | 0     | 0.79   |
| 13660 | 'Ehd1'     | 13.79 | 9.67  | 2.89 | 0.02 | 8.04 | 14.28 | 1.63 | 8.53  | 9.97  | 4.64   |
| 13663 | 'Ei24'     | 7.45  | 16.39 | 6.77 | 11.6 | 16.4 | 11.38 | 3.42 | 11.81 | 28.67 | 8.58   |
| 13664 | 'Eif1a'    | 49.96 | 59.53 | 59.7 | 98   | 42.9 | 35.74 | 64   | 58.26 | 74.77 | 46.94  |
| 13665 | 'Eif2s1'   | 33.26 | 33.95 | 17.3 | 33   | 22.6 | 32.31 | 21.5 | 31.54 | 28.47 | 27.05  |
| 13666 | 'Eif2ak3'  | 2.2   | 0.4   | 2.87 | 4.62 | 3.06 | 0.06  | 0    | 0.01  | 0     | 0.85   |
| 13667 | 'Eif2b4'   | 34.19 | 14.91 | 32   | 21.7 | 39.8 | 28.84 | 36.9 | 35.02 | 36.66 | 32.5   |
| 13669 | 'Eif3a'    | 32.04 | 22.53 | 17.4 | 23.5 | 29.6 | 20.75 | 21.1 | 17.37 | 17.62 | 22.88  |
| 13680 | 'Ddx19a'   | 1.05  | 3.65  | 2.32 | 0.02 | 0.76 | 0.68  | 2.52 | 1.67  | 2.6   | 5.09   |
| 13681 | 'Eif4a1'   | 352.7 | 379.9 | 234  | 263  | 268  | 333.5 | 377  | 396.9 | 279.6 | 374.79 |
| 13682 | 'Eif4a2'   | 319.7 | 372.8 | 310  | 383  | 255  | 264.9 | 321  | 261.2 | 220.1 | 236    |
| 13684 | 'Eif4e'    | 190.9 | 256.6 | 145  | 175  | 166  | 194.7 | 141  | 219.2 | 181.7 | 243.43 |
| 13685 | 'Eif4ebp1' | 0.65  | 0     | 0.1  | 0    | 5.36 | 5.78  | 0.16 | 0     | 0.05  | 0      |
| 13688 | 'Eif4ebp2' | 6.53  | 8.6   | 1.39 | 2.05 | 4.02 | 0.03  | 1.14 | 0.79  | 2.41  | 8.09   |
| 13690 | 'Eif4g2'   | 40.04 | 25.59 | 36.3 | 35.6 | 35.7 | 13.45 | 29.7 | 32.81 | 53.31 | 58.85  |
| 13706 | 'Cela2a'   | 0     | 0.93  | 0    | 0    | 0    | 0     | 0    | 0     | 0     | 0      |
| 13709 | 'Elf1'     | 0     | 0.27  | 0.09 | 1.1  | 0.1  | 3.46  | 0.07 | 0.67  | 0.31  | 0.03   |
| 13710 | 'Elf3'     | 0     | 0     | 0.19 | 3.39 | 2.07 | 0     | 0    | 0     | 0     | 0      |
| 13712 | 'Elk1'     | 4.97  | 3.49  | 5.03 | 8.39 | 3.28 | 6.03  | 16   | 9.02  | 2.97  | 5.47   |
| 13713 | 'Elk3'     | 1.02  | 3.52  | 1.02 | 1.32 | 0.95 | 0.3   | 3.15 | 1.77  | 0     | 1.54   |
| 13714 | 'Elk4'     | 1.45  | 3.51  | 1.23 | 2.66 | 0.71 | 5.07  | 0.28 | 0.56  | 2.78  | 0      |
| 13716 | 'Eli'      | 1.36  | 8.34  | 4.61 | 15.4 | 10.8 | 1.49  | 5.65 | 6.55  | 8.35  | 3.88   |
| 13717 | 'Eln'      | 0     | 1.08  | 1.83 | 0    | 0.98 | 0     | 3.81 | 0.97  | 0     | 0.22   |
| 13722 | 'Aimp1'    | 46.37 | 52.16 | 36.1 | 41.3 | 35.8 | 13.74 | 44.4 | 51.93 | 31.52 | 35.88  |
| 13723 | 'Emb'      | 77.99 | 70.72 | 25.6 | 70.3 | 53.4 | 70.24 | 55.6 | 34.24 | 96.47 | 101.25 |
| 13726 | 'Emd'      | 38.54 | 40.04 | 60.6 | 38.3 | 52.9 | 45.67 | 60.8 | 54.14 | 42.39 | 78.35  |
| 13728 | 'Mark2'    | 11.71 | 10.26 | 7.03 | 8.89 | 13.7 | 5.56  | 10.8 | 10.09 | 7.37  | 11.08  |
| 13730 | 'Emp1'     | 0     | 0     | 0.04 | 1.56 | 0    | 0     | 0    | 0     | 0     | 0      |
| 13731 | 'Emp2'     | 0.72  | 0.8   | 2.59 | 0    | 3.21 | 2.24  | 0    | 0     | 3.66  | 5.41   |

|       |            |       |       |      |      |      |       |      |       |       |         |
|-------|------------|-------|-------|------|------|------|-------|------|-------|-------|---------|
| 13732 | 'Emp3'     | 0     | 0.19  | 0    | 0    | 0    | 0     | 0    | 0     | 0     | 0       |
| 13733 | 'Adgre1'   | 0     | 2.84  | 0.25 | 0    | 4.56 | 2.78  | 0    | 0     | 0.71  | 0       |
| 13796 | 'Emx1'     | 0     | 0     | 0    | 0    | 6.88 | 10.14 | 0    | 0     | 0     | 2.28    |
| 13797 | 'Emx2'     | 0     | 0     | 0    | 0    | 0    | 3.04  | 0    | 0     | 11.93 | 3.61    |
| 13800 | 'Enah'     | 9.7   | 3.76  | 7.33 | 12.9 | 6.63 | 4.1   | 5.65 | 7.05  | 1.1   | 3.09    |
| 13803 | 'Enc1'     | 46.94 | 44    | 19.8 | 4.73 | 39.4 | 15.51 | 67.5 | 41.29 | 23.83 | 16.62   |
| 13804 | 'Endog'    | 7.76  | 6.76  | 9.77 | 9.86 | 12.9 | 12.41 | 0    | 4.23  | 11.87 | 4.82    |
| 13805 | 'Eng'      | 0     | 0     | 0.01 | 0    | 0    | 0     | 0    | 0     | 0.01  | 0.86    |
| 13806 | 'Eno1'     | 1030  | 928.3 | 1000 | 851  | 876  | 1503  | 1320 | 1291  | 1390  | 1215.65 |
| 13807 | 'Eno2'     | 243.5 | 243.3 | 335  | 137  | 261  | 221.2 | 248  | 253.1 | 150.3 | 239.73  |
| 13808 | 'Eno3'     | 8.23  | 7.01  | 8.47 | 18.7 | 10.3 | 9.08  | 6.97 | 6.76  | 1.65  | 11.63   |
| 13813 | 'Eomes'    | 0     | 0.9   | 10.9 | 6.62 | 0    | 0     | 2.82 | 2.33  | 0.01  | 0       |
| 13819 | 'Epas1'    | 0.85  | 2.01  | 8.9  | 4.98 | 0.45 | 4.23  | 4.54 | 1.58  | 2.59  | 1.92    |
| 13821 | 'Epb4111'  | 15.72 | 12.59 | 12.2 | 18.8 | 19.9 | 6.04  | 18   | 15.93 | 8.12  | 12.52   |
| 13822 | 'Epb4112'  | 6.91  | 4.71  | 5.85 | 10.1 | 2.77 | 13.11 | 5.47 | 1.74  | 5.72  | 4.68    |
| 13823 | 'Epb4113'  | 41.31 | 50.59 | 48.6 | 24.6 | 43.7 | 31.4  | 40.2 | 57.78 | 28.75 | 46.91   |
| 13824 | 'Epb4114a' | 3.57  | 8.35  | 5.1  | 0    | 3.95 | 0.03  | 1.23 | 7.19  | 1.39  | 8.18    |
| 13829 | 'Dmtn'     | 218.3 | 283   | 156  | 119  | 194  | 213.5 | 192  | 257.2 | 240   | 252.08  |
| 13830 | 'Stom'     | 0     | 0     | 0    | 4.05 | 0.4  | 0     | 2.52 | 1.93  | 0     | 0       |
| 13831 | 'Epc1'     | 7.71  | 15.48 | 5.62 | 37   | 8.13 | 15.18 | 2.81 | 7.58  | 10.62 | 6.15    |
| 13835 | 'Epha1'    | 0     | 0     | 0.05 | 0.31 | 0.15 | 0.11  | 0    | 0     | 0     | 0       |
| 13837 | 'Epha3'    | 0     | 1.06  | 0.42 | 0    | 0    | 0     | 0    | 0.06  | 0     | 1.92    |
| 13838 | 'Epha4'    | 3.97  | 3.28  | 1.4  | 3.07 | 2.26 | 1.29  | 1.13 | 5.57  | 2.67  | 2.06    |
| 13839 | 'Epha5'    | 9.56  | 13.21 | 5.43 | 6.44 | 3.94 | 11.91 | 14   | 12.24 | 16.39 | 4.18    |
| 13840 | 'Epha6'    | 2.99  | 4.89  | 7.49 | 0.6  | 3.63 | 1.43  | 14.3 | 3.05  | 1.13  | 1.18    |
| 13841 | 'Epha7'    | 2.96  | 2.49  | 1.89 | 0    | 7.95 | 2.79  | 11.5 | 4.98  | 16.98 | 4.91    |
| 13842 | 'Epha8'    | 0.05  | 0     | 0    | 0    | 1.58 | 1.14  | 0    | 0     | 0     | 0       |
| 13844 | 'Ephb2'    | 0     | 0.02  | 0.02 | 0    | 0.54 | 0     | 0.65 | 0.77  | 0     | 0.72    |
| 13845 | 'Ephb3'    | 1.69  | 0     | 0.02 | 0    | 0.47 | 0.09  | 2.81 | 0     | 0     | 0       |
| 13846 | 'Ephb4'    | 0     | 0     | 0    | 1.51 | 0    | 0     | 0    | 0     | 1.5   | 0       |
| 13848 | 'Ephb6'    | 4     | 5.01  | 11   | 0    | 13.5 | 8.79  | 19.4 | 5.69  | 26.84 | 6.11    |
| 13849 | 'Ephx1'    | 25.54 | 2.89  | 5.76 | 0.17 | 0.94 | 15.4  | 2.4  | 15.9  | 4.05  | 18.83   |
| 13850 | 'Ephx2'    | 3.57  | 3.71  | 5.39 | 11.8 | 7.6  | 5.27  | 5.66 | 2.12  | 0.02  | 0.56    |
| 13852 | 'Stx2'     | 0.76  | 7.33  | 8.37 | 9.45 | 6.64 | 1.6   | 1.2  | 1.65  | 0.65  | 8.4     |
| 13853 | 'Epm2a'    | 0.97  | 0     | 0    | 0    | 0.05 | 0     | 0    | 1.57  | 0     | 0       |
| 13854 | 'Epn1'     | 3.45  | 5.11  | 11.9 | 0.18 | 4.04 | 3.98  | 6.14 | 3.64  | 6.13  | 3.46    |
| 13855 | 'Epn2'     | 15.03 | 8.02  | 20.3 | 14.2 | 9.48 | 11.93 | 32.2 | 16.24 | 12.74 | 3.87    |
| 13857 | 'Epor'     | 1.82  | 0     | 3.57 | 0    | 0    | 3.33  | 0    | 2.35  | 0     | 0       |
| 13858 | 'Eps15'    | 15.25 | 24.16 | 12.5 | 8.48 | 11   | 10.46 | 14.1 | 15.49 | 13.43 | 15.14   |
| 13859 | 'Eps15l1'  | 14.41 | 26.25 | 19.3 | 7.41 | 15   | 19.76 | 33.1 | 35.46 | 28.59 | 29.44   |
| 13860 | 'Eps8'     | 4.69  | 6.87  | 5.67 | 3.44 | 2.4  | 4.82  | 5.89 | 3.04  | 3.52  | 0.04    |
| 13861 | 'Epx'      | 0     | 2.06  | 0    | 0    | 0    | 0     | 0    | 0     | 0     | 0       |
| 13864 | 'Nr2f6'    | 8.81  | 2.47  | 1.24 | 7.75 | 5.38 | 2.9   | 10.8 | 0.53  | 1.13  | 2.94    |
| 13865 | 'Nr2f1'    | 1.8   | 6.5   | 0.79 | 3.57 | 1.39 | 0     | 4.05 | 0.05  | 0     | 0       |
| 13866 | 'Erbb2'    | 0     | 0     | 0    | 0    | 0    | 0     | 0.01 | 0.05  | 2.4   | 0       |
| 13867 | 'Erbb3'    | 0.17  | 0     | 0.75 | 0    | 0    | 0     | 0    | 0     | 0     | 0       |
| 13869 | 'Erbb4'    | 2.45  | 0.48  | 1.77 | 0.12 | 1.34 | 1.65  | 0.15 | 0.65  | 1.94  | 0.01    |
| 13870 | 'Ercc1'    | 33.8  | 22.54 | 24.5 | 14.3 | 31.7 | 26.5  | 36.5 | 31.58 | 44.75 | 26.77   |
| 13871 | 'Ercc2'    | 0.84  | 2.49  | 1.21 | 1.23 | 4.21 | 0.93  | 2.38 | 0.14  | 0.26  | 4.53    |
| 13872 | 'Ercc3'    | 12.2  | 6.26  | 9.02 | 13.7 | 9.9  | 14.74 | 13.1 | 12.74 | 15.69 | 8.48    |
| 13875 | 'Erf'      | 0     | 0     | 0.66 | 0.1  | 0.31 | 0     | 0    | 0     | 0.08  | 0.02    |
| 13877 | 'Erh'      | 305.1 | 287   | 224  | 449  | 201  | 381.5 | 224  | 340.2 | 239.7 | 328.31  |
| 13885 | 'Esd'      | 90.21 | 102   | 107  | 79.2 | 73.1 | 162.6 | 88.9 | 95.33 | 109.7 | 119.02  |
| 13924 | 'Ptpv'     | 0     | 0     | 0    | 0    | 0.01 | 0     | 0    | 0     | 0.12  | 0       |
| 13929 | 'Amz2'     | 15.66 | 19.21 | 11.1 | 0.02 | 8.78 | 24.71 | 15.8 | 6.25  | 13.39 | 15.91   |
| 13972 | 'Gnb1l'    | 1.12  | 1.89  | 4.7  | 0.02 | 7.29 | 0     | 9.25 | 5.47  | 3.01  | 0       |
| 13982 | 'Esr1'     | 26.19 | 11.6  | 6.7  | 30.2 | 2.73 | 1.65  | 4.89 | 20.49 | 0.02  | 2.95    |
| 13983 | 'Esr2'     | 2.38  | 0.11  | 0.01 | 0    | 0    | 0.01  | 0    | 0     | 2.67  | 0       |

|        |            |       |       |      |      |      |       |      |       |       |         |
|--------|------------|-------|-------|------|------|------|-------|------|-------|-------|---------|
| 13990  | 'Smarcad1' | 5.45  | 0.59  | 3.44 | 6.81 | 1.61 | 5.79  | 3.75 | 1.67  | 1.96  | 2.39    |
| 13992  | 'Khdrbs3'  | 27.51 | 11.36 | 9.61 | 36.3 | 7.54 | 4.72  | 15.5 | 11.44 | 16.34 | 15.27   |
| 13998  | 'Fgd6'     | 0.11  | 0.04  | 0    | 0    | 0    | 0     | 0.46 | 0.6   | 0     | 0       |
| 13999  | 'Gm14288'  | 38.81 | 65.13 | 46.9 | 56.4 | 56   | 62.04 | 40.9 | 34.67 | 37.05 | 39.55   |
| 14000  | 'Droscha'  | 9.17  | 15.3  | 15.4 | 20.5 | 13.6 | 4.06  | 17.7 | 15.61 | 20.86 | 27.51   |
| 14004  | 'Chchd2'   | 1103  | 967.8 | 911  | 798  | 1117 | 1563  | 1008 | 924.7 | 1014  | 1117.67 |
| 14007  | 'Celf2'    | 8.67  | 8.82  | 4.56 | 14.1 | 11.8 | 11.67 | 14.3 | 8.66  | 3.51  | 4.9     |
| 14009  | 'Etv1'     | 11.23 | 5.85  | 9.51 | 1.03 | 12.7 | 37.56 | 4.77 | 2.89  | 25.8  | 61.93   |
| 14011  | 'Etv6'     | 1.81  | 0.67  | 0.93 | 0.23 | 0.57 | 0     | 0    | 0.19  | 0.86  | 1.69    |
| 14013  | 'Mecom'    | 0     | 0.01  | 0    | 0    | 0    | 0     | 0    | 0     | 0     | 0       |
| 14017  | 'Evi2a'    | 5.28  | 16.78 | 14.5 | 0.59 | 21.8 | 34.48 | 19.3 | 3.29  | 3.61  | 5.62    |
| 14020  | 'Evi5'     | 6.2   | 1.65  | 5.61 | 15.4 | 7.12 | 6.67  | 7.3  | 4.08  | 5.84  | 3.58    |
| 14025  | 'Bcl11a'   | 5.9   | 6.39  | 26.7 | 12.4 | 16.5 | 4.51  | 0    | 16.17 | 11.86 | 3.13    |
| 14026  | 'Evl'      | 9.69  | 10.32 | 13.3 | 23   | 13.4 | 8.38  | 8.82 | 7.72  | 14.3  | 4.21    |
| 14027  | 'Evpl'     | 3.92  | 3.18  | 1.01 | 4.42 | 0.1  | 2.31  | 0.57 | 0.86  | 0.28  | 3.19    |
| 14030  | 'Ewsr1'    | 160.1 | 204.4 | 151  | 180  | 193  | 172.8 | 124  | 230.6 | 249.6 | 199.13  |
| 14038  | 'Wfdc18'   | 0     | 3.68  | 0    | 0    | 1.69 | 3     | 0    | 2.85  | 0     | 0       |
| 14042  | 'Ext1'     | 0.2   | 0.78  | 3.25 | 4.17 | 5.58 | 2.55  | 1.5  | 0.7   | 1.98  | 2.37    |
| 14043  | 'Ext2'     | 32.51 | 39.33 | 29   | 23.5 | 12.8 | 10.1  | 51.2 | 13.7  | 50    | 19.97   |
| 140476 | 'Strc'     | 0     | 0     | 0    | 0    | 0    | 0     | 0.48 | 0     | 0.07  | 0       |
| 140477 | 'Dmbx1'    | 0     | 0     | 0    | 0    | 0.01 | 0     | 0    | 0     | 0     | 0       |
| 14048  | 'Eya1'     | 1.47  | 0.13  | 4.18 | 8.97 | 0    | 0     | 8.16 | 0.18  | 0     | 1.79    |
| 140481 | 'Man2a2'   | 9.87  | 3.57  | 3.24 | 21.6 | 13.3 | 9.29  | 3.08 | 5.69  | 12.46 | 2.47    |
| 140482 | 'Zfp358'   | 6.67  | 2.36  | 13.5 | 6.88 | 10.5 | 12.12 | 10.3 | 6.11  | 15.02 | 17.14   |
| 140483 | 'Hnmt'     | 39.74 | 21.07 | 22.9 | 1.65 | 20.1 | 59.94 | 29.5 | 23.58 | 41.45 | 23.3    |
| 140484 | 'Pofut1'   | 0.45  | 2.45  | 0.67 | 1.16 | 1.34 | 2.8   | 0.49 | 0.69  | 1.72  | 1.29    |
| 140488 | 'Igf2bp3'  | 0.12  | 0.08  | 0.18 | 0.37 | 0.2  | 0.55  | 0    | 0.08  | 0     | 0.26    |
| 140489 | 'Bhlhe23'  | 0     | 1.42  | 0    | 0.02 | 0    | 0     | 0.02 | 0     | 0     | 0       |
| 14049  | 'Eya2'     | 0     | 0     | 0    | 0    | 0.72 | 0.02  | 0    | 0     | 0     | 0       |
| 140491 | 'Ppp1r3a'  | 0.01  | 0     | 0.03 | 0.01 | 0    | 0     | 0.01 | 0     | 0.01  | 0.01    |
| 140492 | 'Kcnn2'    | 3.4   | 2.46  | 11.9 | 0.03 | 8.01 | 13.21 | 13   | 1.5   | 1.46  | 1.44    |
| 140493 | 'Kcnn3'    | 3.08  | 0.91  | 4.46 | 3.47 | 1.42 | 2.87  | 4.31 | 0.74  | 0.36  | 1.1     |
| 140494 | 'Atp6v0a4' | 0     | 1.02  | 0    | 0    | 0    | 1.75  | 0    | 0.64  | 0     | 0       |
| 140497 | 'Cd300c2'  | 0     | 0     | 0.04 | 0    | 0    | 13.93 | 0    | 0     | 0     | 0       |
| 140498 | 'Rxfp2'    | 1.97  | 0     | 0.03 | 0    | 0    | 4.46  | 0    | 0     | 0     | 1.77    |
| 140499 | 'Ube2j2'   | 11.06 | 9     | 8.52 | 9.99 | 7.61 | 5.92  | 7.47 | 9.94  | 15.32 | 8.12    |
| 14050  | 'Eya3'     | 2.22  | 5.65  | 2.52 | 0    | 0.86 | 0.02  | 5.98 | 1.87  | 0     | 1.02    |
| 140500 | 'Acap3'    | 9.34  | 5.08  | 16.5 | 5.21 | 9.25 | 9.01  | 7.46 | 15.51 | 16.66 | 6.07    |
| 14051  | 'Eya4'     | 0     | 0     | 0    | 0    | 0    | 0.01  | 0    | 0     | 0     | 0       |
| 140546 | 'Eri3'     | 163.7 | 183.5 | 165  | 345  | 198  | 187.3 | 111  | 216.4 | 227.2 | 162.75  |
| 14055  | 'Ezh1'     | 15.96 | 16.26 | 18   | 10.2 | 10.7 | 17.68 | 25.5 | 15.16 | 26.29 | 19.24   |
| 140557 | 'Smc1b'    | 0.76  | 0     | 0    | 0.03 | 0    | 0     | 0.04 | 0     | 0     | 0.28    |
| 140559 | 'Igsf8'    | 64.96 | 72.83 | 103  | 38.6 | 135  | 51.98 | 133  | 107.8 | 128.8 | 81.66   |
| 14056  | 'Ezh2'     | 0     | 0     | 0    | 0    | 2.27 | 0.11  | 0    | 0     | 0     | 0       |
| 14057  | 'Sfxn1'    | 76.44 | 78.71 | 53.7 | 64.3 | 83.3 | 101.7 | 57.1 | 70.8  | 49.95 | 80.41   |
| 140570 | 'Plxnb2'   | 2.28  | 3.91  | 8.17 | 8.47 | 4.25 | 2.08  | 5.5  | 1.96  | 7.21  | 5.91    |
| 140571 | 'Plxnb3'   | 2.44  | 0     | 4.01 | 0.09 | 0    | 0.16  | 0.04 | 0     | 0     | 0       |
| 140577 | 'Ankrd6'   | 14.99 | 11.23 | 11.4 | 23.8 | 15.1 | 12.99 | 24.9 | 18.05 | 13.25 | 18.57   |
| 140579 | 'Elmo2'    | 24.76 | 51.15 | 22.7 | 22.1 | 41   | 26.41 | 40.7 | 55.1  | 54.77 | 29.43   |
| 14058  | 'F10'      | 0     | 0     | 0    | 0    | 0.02 | 0.02  | 0    | 0     | 0     | 1.47    |
| 140580 | 'Elmo1'    | 51.91 | 31.72 | 61.6 | 36.4 | 50.5 | 31.46 | 20.6 | 40    | 67.41 | 25.78   |
| 14061  | 'F2'       | 0     | 0     | 0    | 0.39 | 0    | 0     | 0    | 0.1   | 0.5   | 0.13    |
| 14062  | 'F2r'      | 7.19  | 10.62 | 14.8 | 0    | 0    | 0.55  | 4.28 | 7.74  | 5.52  | 3.91    |
| 140629 | 'Ubox5'    | 1.43  | 0     | 3.6  | 6.5  | 5.12 | 0     | 4.89 | 3.67  | 3.55  | 1.74    |
| 14063  | 'F2rl1'    | 0     | 0     | 1.4  | 0    | 0    | 0     | 0    | 0     | 0     | 0       |
| 140630 | 'Ube4a'    | 3.34  | 2.12  | 3.39 | 4.97 | 2.66 | 0.34  | 8.45 | 0.87  | 3.74  | 3.37    |
| 14064  | 'F2rl2'    | 12.18 | 3.26  | 1.88 | 0    | 0    | 3.43  | 0    | 0     | 0.05  | 6.42    |
| 14065  | 'F2rl3'    | 0     | 1.15  | 0    | 0    | 0    | 2.45  | 0    | 0     | 2.25  | 2.3     |

|        |           |       |       |      |      |      |       |      |       |       |        |
|--------|-----------|-------|-------|------|------|------|-------|------|-------|-------|--------|
| 14066  | 'F3'      | 41.03 | 36.53 | 16.9 | 61.6 | 7.67 | 38.31 | 16.2 | 24.62 | 49.85 | 3.17   |
| 14069  | 'F8'      | 0.45  | 0     | 0.43 | 0    | 0    | 0.04  | 0    | 0.82  | 1.13  | 0.81   |
| 14070  | 'F8a'     | 14.57 | 29.05 | 33.7 | 46.4 | 16.7 | 23.18 | 36.5 | 24.69 | 18.73 | 17.15  |
| 140703 | 'Emid1'   | 0     | 4.2   | 4.35 | 0    | 0    | 0     | 8.38 | 3.93  | 4.64  | 0      |
| 140709 | 'Col26a1' | 0     | 0.29  | 0.74 | 0    | 0.8  | 0.02  | 0.07 | 0     | 0     | 0.05   |
| 140721 | 'Caskin2' | 0.06  | 0.01  | 3.92 | 0    | 0.11 | 0.01  | 2.85 | 1.38  | 0.88  | 0.24   |
| 140723 | 'Cacng5'  | 31.24 | 2.04  | 27.8 | 10.4 | 15.7 | 20.65 | 2.95 | 12.23 | 69.11 | 109.68 |
| 14073  | 'Faah'    | 25.88 | 15.8  | 23.6 | 13.9 | 8.97 | 4.25  | 11.9 | 10.24 | 15.23 | 19.04  |
| 140740 | 'Sec63'   | 3.21  | 0.41  | 1.58 | 2.14 | 3.84 | 2.97  | 5.66 | 0.45  | 1.74  | 3.14   |
| 140741 | 'Gpr6'    | 25.67 | 3.77  | 3.23 | 29.6 | 0    | 10.24 | 0.02 | 12.55 | 14.06 | 11.35  |
| 140742 | 'Sesn1'   | 30.47 | 22.14 | 19.7 | 20.6 | 23.8 | 14.5  | 13.3 | 24    | 22.82 | 14.01  |
| 140743 | 'Rem2'    | 15    | 34.06 | 17.4 | 31.9 | 20.7 | 0.95  | 1.86 | 15.44 | 1.51  | 13.22  |
| 14077  | 'Fabp3'   | 252.5 | 156.9 | 186  | 250  | 122  | 252.6 | 152  | 203.2 | 336   | 306.3  |
| 140780 | 'Bmp2k'   | 0     | 0.12  | 0.14 | 0    | 0.01 | 1.14  | 0    | 0     | 1.2   | 0      |
| 140781 | 'Myh7'    | 4.89  | 8.85  | 4.75 | 8.04 | 3.29 | 4.83  | 9.88 | 2.86  | 2.79  | 5.27   |
| 140792 | 'Colec12' | 2.87  | 4.75  | 4.06 | 11.7 | 4.62 | 2.81  | 3.82 | 2.36  | 5.7   | 4.92   |
| 140795 | 'P2ry14'  | 2.05  | 0     | 0.09 | 3.98 | 0.03 | 0     | 0.55 | 0.31  | 2.43  | 0      |
| 140806 | 'Il25'    | 0     | 0     | 0    | 0    | 0    | 0     | 0    | 0     | 0     | 3.06   |
| 14081  | 'Acsl1'   | 11.86 | 15.12 | 16.3 | 7.05 | 12.6 | 5.68  | 15.5 | 16.83 | 10.02 | 23.21  |
| 140810 | 'Ttbk2'   | 1.81  | 3.21  | 1.91 | 2.07 | 4.87 | 0.36  | 2.09 | 1.61  | 2.97  | 1.92   |
| 14082  | 'Fadd'    | 0.67  | 0.07  | 3.13 | 0.14 | 1.76 | 0.93  | 0.04 | 0.28  | 2.21  | 4.23   |
| 14083  | 'Ptk2'    | 8.08  | 7.15  | 4.31 | 6.1  | 4.87 | 3.05  | 10.1 | 6.52  | 9.07  | 7.01   |
| 14084  | 'Faf1'    | 10.82 | 4.07  | 2.55 | 5.72 | 5.62 | 3.79  | 9.76 | 1.68  | 4.96  | 1.53   |
| 14085  | 'Fah'     | 11.44 | 4.32  | 10.1 | 12.6 | 12.9 | 18.74 | 14.8 | 4.12  | 25.37 | 17.86  |
| 140858 | 'Wdr5'    | 1.44  | 20.32 | 9.9  | 41.8 | 23.4 | 3.88  | 21   | 9.16  | 4.44  | 6.5    |
| 140859 | 'Nek8'    | 0     | 5.76  | 0.14 | 0.57 | 4.37 | 8.72  | 0.73 | 6.32  | 3.54  | 0.02   |
| 14086  | 'Fscn1'   | 35.75 | 36.67 | 43.5 | 28.3 | 36   | 26.03 | 40.1 | 38.85 | 37.19 | 43.53  |
| 14087  | 'Fanca'   | 0.03  | 0.01  | 0    | 0    | 0    | 0     | 0    | 0     | 0     | 0      |
| 14088  | 'Fancc'   | 4.02  | 5.58  | 7.48 | 6.67 | 8.96 | 0.11  | 6.77 | 0.16  | 5.67  | 9.31   |
| 140887 | 'Lnx2'    | 0.81  | 1.32  | 0.29 | 3.02 | 0.93 | 0.01  | 0    | 0.78  | 0.01  | 2.45   |
| 14089  | 'Fap'     | 0     | 0     | 0    | 0    | 0    | 0     | 2.91 | 0     | 0     | 0      |
| 140904 | 'Caln1'   | 11.95 | 15.21 | 13.8 | 8.6  | 28.5 | 13.72 | 13.9 | 16.79 | 6.9   | 3.69   |
| 140917 | 'Dclre1b' | 3.65  | 1.16  | 1.73 | 6.29 | 0.36 | 1.64  | 4.43 | 1.8   | 6.18  | 1.2    |
| 140919 | 'Slc17a6' | 39.26 | 68.01 | 110  | 104  | 78.4 | 83.55 | 155  | 67.8  | 72.68 | 134.26 |
| 14102  | 'Fas'     | 0     | 0     | 0    | 0    | 0    | 0     | 3.1  | 0     | 0.06  | 0      |
| 14104  | 'Fasn'    | 6.76  | 8.91  | 11.7 | 10.1 | 10.9 | 10.52 | 9.79 | 6.21  | 12.83 | 10.28  |
| 14105  | 'Srsf10'  | 40.01 | 30.63 | 30.7 | 31.7 | 28.1 | 24.3  | 30.2 | 25.32 | 36.74 | 19.85  |
| 14106  | 'Foxh1'   | 0.04  | 0.06  | 0.03 | 0.06 | 0.04 | 0.04  | 0.13 | 0.03  | 0     | 0.11   |
| 14107  | 'Fat1'    | 0.88  | 1.16  | 0.76 | 0.29 | 0.48 | 0     | 0    | 0.02  | 0.01  | 0.11   |
| 14109  | 'Fau'     | 486.2 | 450.8 | 698  | 682  | 444  | 569.1 | 514  | 247.6 | 493.5 | 460.07 |
| 14113  | 'Fbl'     | 27.27 | 25.81 | 31.6 | 57.5 | 30.7 | 15.09 | 28.6 | 13.86 | 42.11 | 39.18  |
| 14114  | 'Fbln1'   | 6.69  | 1.33  | 0.02 | 0    | 1.03 | 0     | 12.7 | 2.72  | 2.43  | 0.65   |
| 14115  | 'Fbln2'   | 0     | 0.58  | 0.01 | 3.42 | 0    | 0     | 7.06 | 0.76  | 0     | 0      |
| 14118  | 'Fbn1'    | 0     | 0     | 0    | 0.07 | 0.27 | 0.16  | 0    | 0.03  | 0     | 0      |
| 14119  | 'Fbn2'    | 2.16  | 1.41  | 1.14 | 0    | 1.38 | 0     | 0.01 | 0.03  | 0.14  | 0      |
| 14120  | 'Fbp2'    | 0     | 0     | 0.11 | 0.09 | 0    | 0.04  | 0    | 0     | 0.03  | 0      |
| 14121  | 'Fbp1'    | 0     | 0     | 6.3  | 0    | 0    | 0     | 0    | 0     | 0.03  | 0      |
| 14123  | 'Fbrs'    | 6.72  | 8.43  | 8.6  | 9.71 | 0.59 | 3.66  | 6.06 | 1.07  | 2.84  | 2.7    |
| 14127  | 'Fcer1g'  | 18.63 | 16.77 | 10.5 | 47.9 | 15.7 | 176.3 | 28.6 | 7.3   | 11.6  | 17.04  |
| 14128  | 'Fcer2a'  | 0.01  | 0.36  | 0.12 | 0.88 | 0.01 | 0.69  | 0.05 | 0     | 0     | 0.18   |
| 14129  | 'Fcgr1'   | 0     | 0     | 0    | 0    | 0    | 6.74  | 0    | 1.46  | 0     | 0.74   |
| 14130  | 'Fcgr2b'  | 0     | 0     | 0    | 0    | 6.73 | 0     | 0    | 0     | 0     | 0.06   |
| 14131  | 'Fcgr3'   | 13.59 | 2.67  | 3.87 | 18.9 | 3.91 | 100.8 | 6.74 | 2.78  | 0     | 3.37   |
| 14132  | 'Fcgrt'   | 2.99  | 8.26  | 0.03 | 0    | 0    | 8.55  | 0    | 6.55  | 0     | 0      |
| 14137  | 'Fdft1'   | 62.94 | 53.02 | 72.3 | 45.4 | 81.7 | 36.94 | 75.2 | 71.35 | 56.79 | 58.49  |
| 14148  | 'Fdx1'    | 13.55 | 14.59 | 22.4 | 16.2 | 26.7 | 23.14 | 22.3 | 10.89 | 8.34  | 7.85   |
| 14149  | 'Fdxr'    | 3.38  | 18.35 | 10   | 0    | 7.37 | 16.05 | 4.51 | 6.79  | 5.17  | 12.38  |
| 14151  | 'Fech'    | 39.18 | 43.2  | 34.1 | 21.4 | 31   | 24.19 | 13.8 | 32    | 32.6  | 51.3   |

|       |            |       |       |      |      |      |       |      |       |       |        |
|-------|------------|-------|-------|------|------|------|-------|------|-------|-------|--------|
| 14154 | 'Fem1a'    | 1.5   | 5.7   | 4.98 | 10.5 | 1.58 | 0.44  | 0.01 | 3.5   | 2.35  | 2.41   |
| 14155 | 'Fem1b'    | 8.89  | 6.84  | 6.59 | 16   | 1.86 | 5.52  | 8.01 | 3.75  | 8.14  | 2.96   |
| 14156 | 'Fen1'     | 3.53  | 6.95  | 6.37 | 17.8 | 23.4 | 24.77 | 0.07 | 8.41  | 5.7   | 31.33  |
| 14158 | 'Fer'      | 14.65 | 8.07  | 9.3  | 5.43 | 10.9 | 11.27 | 16.6 | 6.15  | 11.79 | 15.59  |
| 14159 | 'Fes'      | 0     | 0     | 0.59 | 3.05 | 0.07 | 0     | 1.76 | 0     | 4.5   | 6.07   |
| 14160 | 'Lgr5'     | 0.03  | 0.03  | 1.3  | 1.54 | 0.55 | 0.06  | 0.09 | 1.38  | 0.11  | 0.03   |
| 14163 | 'Fgd1'     | 0     | 0.63  | 0    | 0.71 | 0.02 | 0.54  | 0    | 1.45  | 0     | 0      |
| 14164 | 'Fgf1'     | 3.24  | 12.35 | 14   | 3.77 | 14.7 | 7.02  | 9.14 | 9.12  | 20.42 | 11.38  |
| 14165 | 'Fgf10'    | 0.01  | 0.06  | 0    | 0    | 0.35 | 0     | 0    | 0     | 0.47  | 1.58   |
| 14166 | 'Fgf11'    | 0.96  | 0     | 0.69 | 0    | 4.28 | 0     | 1.61 | 2.06  | 0     | 0.48   |
| 14167 | 'Fgf12'    | 44.6  | 47.94 | 40.2 | 46.8 | 29   | 36.39 | 52   | 49.74 | 31.3  | 32.94  |
| 14168 | 'Fgf13'    | 41.1  | 28.87 | 25   | 14.9 | 51.7 | 43.03 | 93.9 | 80.55 | 31.77 | 50.24  |
| 14169 | 'Fgf14'    | 12.96 | 10.16 | 18.7 | 17.1 | 24.5 | 12.57 | 7.49 | 13.55 | 6.08  | 16.23  |
| 14170 | 'Fgf15'    | 0     | 0     | 0    | 0    | 0    | 0     | 0.33 | 0     | 0     | 0      |
| 14171 | 'Fgf17'    | 2.16  | 2.46  | 1.32 | 0    | 14.3 | 26.9  | 1.75 | 0.03  | 21.94 | 33.82  |
| 14172 | 'Fgf18'    | 0     | 0     | 0.06 | 0    | 1.19 | 0     | 0.36 | 0     | 0     | 0      |
| 14178 | 'Fgf7'     | 0     | 1.05  | 0    | 0    | 0    | 1.07  | 0    | 0     | 0     | 0.98   |
| 14180 | 'Fgf9'     | 5.99  | 7.51  | 8.93 | 8.12 | 10.3 | 3.82  | 1.42 | 6.4   | 4.41  | 0.07   |
| 14182 | 'Fgfr1'    | 12.28 | 12.3  | 5.57 | 25.7 | 7.78 | 4.77  | 7.87 | 11.25 | 10.73 | 3.34   |
| 14183 | 'Fgfr2'    | 1.47  | 0.75  | 3.48 | 0    | 0.34 | 1.77  | 0    | 0.82  | 0.05  | 0      |
| 14184 | 'Fgfr3'    | 5.94  | 0.85  | 5.04 | 6.4  | 2.16 | 0.46  | 0    | 3.24  | 7.69  | 0.15   |
| 14187 | 'Akr1b8'   | 0     | 0     | 0.04 | 0    | 0    | 0     | 0    | 0     | 0     | 0      |
| 14190 | 'Fgl2'     | 0     | 0.91  | 0    | 0    | 0.61 | 0     | 0    | 0     | 0.91  | 0      |
| 14191 | 'Fgr'      | 0     | 0.14  | 0    | 0    | 0.68 | 0     | 0    | 0     | 0     | 0      |
| 14194 | 'Fh1'      | 96.05 | 95.23 | 84.9 | 60.6 | 89   | 127.8 | 143  | 109.1 | 94.48 | 86.29  |
| 14198 | 'Fhit'     | 4.65  | 0     | 14   | 1.05 | 20.3 | 2.01  | 3.65 | 13.1  | 8.06  | 7.88   |
| 14199 | 'Fhl1'     | 84.71 | 107.9 | 98.4 | 69.1 | 76.3 | 77.6  | 92.5 | 120   | 59.19 | 62.48  |
| 14200 | 'Fhl2'     | 7.48  | 8.46  | 14.5 | 0.41 | 0.55 | 6.85  | 25.8 | 8.35  | 0.43  | 8.87   |
| 14201 | 'Fhl3'     | 0     | 0.09  | 0    | 0    | 0.3  | 0     | 0    | 0     | 0     | 0      |
| 14202 | 'Fhl4'     | 0     | 4.24  | 0    | 0    | 0    | 0.07  | 0    | 1.76  | 0.02  | 0      |
| 14204 | 'Il4i1'    | 0     | 2.87  | 3.69 | 2.45 | 1.18 | 0     | 0    | 0.35  | 0.02  | 0      |
| 14205 | 'Vegfd'    | 0     | 0     | 0    | 0    | 0    | 4.26  | 0    | 0.23  | 0.28  | 0      |
| 14208 | 'Ppm1g'    | 78.06 | 54.16 | 65.1 | 56.6 | 59.8 | 39.36 | 83.2 | 43.79 | 55.73 | 67.05  |
| 14211 | 'Smc2'     | 2.74  | 1.98  | 3.01 | 1.28 | 1.29 | 1.05  | 13.2 | 0.87  | 2.65  | 4.92   |
| 14218 | 'Sh3pxd2a' | 0.06  | 0.08  | 1.45 | 0.01 | 0.28 | 0     | 0    | 0.08  | 0     | 0      |
| 14219 | 'Ctgf'     | 0     | 0     | 3.45 | 0.71 | 0    | 0     | 0.02 | 0     | 0     | 0.35   |
| 14221 | 'Fjx1'     | 0.34  | 0.47  | 0    | 3.44 | 0.73 | 1.22  | 2.09 | 0.02  | 2.18  | 0      |
| 14225 | 'Fkbp1a'   | 504.8 | 517.8 | 395  | 441  | 574  | 597.2 | 437  | 671.4 | 397.1 | 439.62 |
| 14226 | 'Fkbp1b'   | 33    | 4.37  | 17.6 | 3.67 | 8.81 | 17.62 | 9.27 | 27.63 | 9.99  | 14     |
| 14227 | 'Fkbp2'    | 541.3 | 474.6 | 476  | 412  | 538  | 716.8 | 436  | 474.2 | 657.7 | 673.05 |
| 14228 | 'Fkbp4'    | 150.8 | 168.3 | 139  | 156  | 134  | 167.3 | 144  | 160.7 | 244.8 | 169.94 |
| 14229 | 'Fkbp5'    | 1.27  | 0.59  | 2.4  | 13   | 0.05 | 1.25  | 0.03 | 5.89  | 2.53  | 1.94   |
| 14230 | 'Fkbp10'   | 0     | 1.5   | 0.72 | 0.33 | 1.05 | 0     | 0.15 | 0     | 1.13  | 0      |
| 14231 | 'Fkbp7'    | 4.54  | 5.69  | 4.45 | 12.6 | 0.08 | 5.53  | 0    | 8.79  | 0     | 2.49   |
| 14232 | 'Fkbp8'    | 88.48 | 115.9 | 127  | 115  | 118  | 155   | 127  | 108   | 119.4 | 130.13 |
| 14233 | 'Foxi1'    | 0     | 0     | 0    | 0    | 0    | 1.64  | 0    | 0     | 0     | 0      |
| 14234 | 'Foxc2'    | 0     | 0     | 0    | 0    | 0    | 0     | 0    | 0     | 0     | 0.02   |
| 14235 | 'Foxm1'    | 0.03  | 0.04  | 0.28 | 0    | 0    | 0.01  | 0    | 0.12  | 0     | 0.01   |
| 14236 | 'Foxn2'    | 2.08  | 1.08  | 0.94 | 4.41 | 0.71 | 0.56  | 0    | 0.53  | 0.59  | 0.48   |
| 14241 | 'Foxl1'    | 0.03  | 0     | 0    | 0    | 0.02 | 0     | 0    | 0     | 0.01  | 0      |
| 14245 | 'Lpin1'    | 11.1  | 10    | 7.67 | 7.47 | 18   | 1.57  | 9.2  | 16.86 | 9.01  | 13.7   |
| 14247 | 'Fli1'     | 0     | 0     | 0    | 3.91 | 0    | 0.25  | 0    | 0     | 0     | 0      |
| 14248 | 'Flii'     | 23.52 | 14.35 | 23.3 | 13.6 | 14.8 | 11.62 | 18.7 | 12.57 | 31.27 | 27.13  |
| 14251 | 'Flot1'    | 92.13 | 112.3 | 125  | 125  | 127  | 137.3 | 140  | 123.7 | 106.6 | 115.16 |
| 14252 | 'Flot2'    | 76.64 | 62.9  | 62.6 | 111  | 51.9 | 64.42 | 54.6 | 72.49 | 63.6  | 57.67  |
| 14254 | 'Flt1'     | 0     | 0     | 0    | 0    | 0.56 | 0     | 0    | 0     | 0     | 0      |
| 14255 | 'Flt3'     | 4.35  | 7.2   | 14.8 | 5.13 | 3.69 | 0.01  | 11   | 5.33  | 2.33  | 0      |
| 14256 | 'Flt3l'    | 0     | 7.68  | 0    | 0    | 0    | 4.36  | 0    | 0     | 5.24  | 13.42  |

|        |           |       |       |      |      |      |       |      |       |       |         |
|--------|-----------|-------|-------|------|------|------|-------|------|-------|-------|---------|
| 14260  | 'Fmn1'    | 0.36  | 0.46  | 0.9  | 0    | 1.06 | 2     | 0.22 | 0.46  | 1.76  | 0.16    |
| 14261  | 'Fmo1'    | 0     | 0.69  | 3.45 | 0    | 0    | 0.06  | 0    | 2.71  | 0.75  | 0       |
| 14263  | 'Fmo5'    | 1.87  | 1.16  | 0    | 0    | 1.25 | 0     | 0    | 0     | 0     | 2.13    |
| 14264  | 'Fmod'    | 0     | 0     | 0    | 0    | 0    | 0     | 1.93 | 0     | 0     | 0       |
| 14265  | 'Fmr1'    | 1.46  | 0.41  | 1.77 | 1.56 | 3.04 | 2.25  | 4.2  | 2.47  | 0.09  | 0.01    |
| 14266  | 'Aff2'    | 2.83  | 0.35  | 0.71 | 0.21 | 0.8  | 0.84  | 2.29 | 2.57  | 2     | 1.57    |
| 14268  | 'Fn1'     | 0     | 0.04  | 0    | 0    | 1.6  | 0     | 0    | 0     | 0.01  | 0       |
| 142681 | 'Slc34a3' | 0     | 0     | 0    | 0    | 1.97 | 0     | 0    | 0     | 0     | 0       |
| 142682 | 'Zcchc14' | 2.45  | 3.86  | 3.51 | 6.24 | 2.51 | 0.73  | 4.79 | 5.19  | 2.5   | 1.87    |
| 142687 | 'Asb14'   | 0     | 0.24  | 0.24 | 0    | 0.03 | 0     | 0.03 | 0     | 0     | 0.21    |
| 142688 | 'Asb13'   | 18.36 | 17.35 | 37.3 | 17   | 28.2 | 28.92 | 11.9 | 31.95 | 19.6  | 20.49   |
| 14269  | 'Fnbp1'   | 10.96 | 10.93 | 16   | 7.79 | 8.65 | 6.55  | 10.3 | 4.12  | 8.99  | 9.25    |
| 14270  | 'Srgap2'  | 5.72  | 4.2   | 4.08 | 6.34 | 2.53 | 6.45  | 4.08 | 5.68  | 2.54  | 9.22    |
| 14272  | 'Fnta'    | 14.62 | 15.92 | 17.5 | 44.1 | 2.29 | 17.79 | 8.07 | 37.82 | 31.82 | 7.03    |
| 14281  | 'Fos'     | 166.7 | 604.7 | 453  | 1226 | 12.1 | 367.2 | 336  | 82    | 39.46 | 122.88  |
| 14282  | 'Fosb'    | 2.45  | 30.72 | 52   | 77.7 | 0.04 | 5.97  | 43.3 | 3.55  | 1.93  | 30.82   |
| 14283  | 'Fosl1'   | 0     | 1.22  | 0    | 5.76 | 0.03 | 0     | 1.08 | 0     | 0     | 1.45    |
| 14284  | 'Fosl2'   | 0     | 1.16  | 0.5  | 0    | 0.07 | 1.25  | 0    | 0     | 1.35  | 1.2     |
| 14287  | 'Fpgs'    | 4.95  | 4.91  | 9.15 | 7.97 | 6.73 | 7.68  | 4.52 | 5.51  | 6.77  | 4.15    |
| 14289  | 'Fpr2'    | 0     | 0     | 0    | 0    | 0    | 0     | 0    | 0     | 1.29  | 0       |
| 14293  | 'Fpr1'    | 0.03  | 2.15  | 0    | 0    | 0    | 0     | 0    | 0     | 0     | 0       |
| 14296  | 'Frat1'   | 43.64 | 49.12 | 27.1 | 34.9 | 47.4 | 48.75 | 67.8 | 52.28 | 23.14 | 37.86   |
| 14297  | 'Fxn'     | 30.89 | 27.01 | 19.9 | 51.2 | 24.9 | 14.89 | 1.21 | 16.21 | 42.91 | 16.19   |
| 142980 | 'Tlr3'    | 0     | 0.45  | 0    | 0    | 0.12 | 0     | 0    | 1.58  | 0     | 1.15    |
| 14299  | 'Ncs1'    | 128.7 | 107.8 | 90.7 | 110  | 98.1 | 139.5 | 92.2 | 127   | 68.83 | 102.01  |
| 14300  | 'Frg1'    | 44.71 | 28.93 | 40.8 | 65.5 | 59.6 | 80.5  | 49.2 | 50.82 | 53.81 | 64.16   |
| 14312  | 'Brd2'    | 28.02 | 37.97 | 35.1 | 70.7 | 29.3 | 36.17 | 37.5 | 20.25 | 37.8  | 32.69   |
| 14313  | 'Fst'     | 0     | 0     | 0    | 0    | 0    | 0     | 0    | 0     | 0     | 1.06    |
| 14314  | 'Fstl1'   | 5.44  | 1.68  | 3.09 | 0    | 5.81 | 2.06  | 6.19 | 7.86  | 2.34  | 4.7     |
| 14317  | 'Ftcd'    | 0     | 0.38  | 0    | 0    | 0    | 0     | 0    | 0     | 0.26  | 0       |
| 14319  | 'Fth1'    | 1945  | 2060  | 1704 | 2059 | 9095 | 2966  | 2461 | 2095  | 1358  | 1916.33 |
| 14325  | 'Ftl1'    | 778.6 | 1024  | 635  | 1795 | 875  | 1294  | 674  | 879.7 | 802.6 | 1075.28 |
| 14339  | 'Aktip'   | 124.7 | 130.9 | 137  | 103  | 146  | 129.5 | 140  | 105.5 | 158.9 | 120.24  |
| 14345  | 'Fut4'    | 0     | 0     | 1.9  | 0    | 0.13 | 0     | 2.26 | 1     | 0     | 0       |
| 14348  | 'Fut9'    | 4.24  | 2.72  | 2.18 | 1.8  | 4.85 | 2.12  | 2.71 | 2.07  | 1.9   | 2.87    |
| 14349  | 'Fv1'     | 7.54  | 3.82  | 2.62 | 0    | 0    | 0.54  | 0    | 0     | 0.09  | 0       |
| 14356  | 'Timm10b' | 43.09 | 47.66 | 73.8 | 94.2 | 60.3 | 62.71 | 52.3 | 64.33 | 47.98 | 54.48   |
| 14357  | 'Dtx1'    | 8.92  | 9.1   | 9.07 | 10.8 | 6.35 | 2.41  | 7.96 | 6.97  | 15.11 | 1.96    |
| 14359  | 'Fxr1'    | 31.49 | 39.17 | 9.88 | 37.1 | 21   | 38.38 | 28.7 | 27.33 | 36.12 | 19.85   |
| 14360  | 'Fyn'     | 8.05  | 14.03 | 18.9 | 11.4 | 10.8 | 8.45  | 8.26 | 5.87  | 7.38  | 2.87    |
| 14362  | 'Fzd1'    | 0.01  | 3.7   | 0.01 | 0    | 1.2  | 0     | 0    | 0     | 0.87  | 0       |
| 14365  | 'Fzd3'    | 2.89  | 2.77  | 3.94 | 1.47 | 2.22 | 2.03  | 0.89 | 1.43  | 0.44  | 2.49    |
| 14367  | 'Fzd5'    | 0.21  | 0     | 0.01 | 0    | 0    | 0     | 0    | 0     | 0     | 1.81    |
| 14368  | 'Fzd6'    | 0     | 0     | 1.16 | 0    | 0.04 | 0     | 0    | 0     | 1.75  | 0       |
| 14369  | 'Fzd7'    | 0.01  | 0     | 0    | 0    | 0    | 0     | 0    | 0     | 0     | 0       |
| 14370  | 'Fzd8'    | 0.64  | 0     | 0    | 0    | 0    | 0     | 0    | 0.21  | 0.04  | 0       |
| 14371  | 'Fzd9'    | 3.44  | 0.52  | 0    | 9.29 | 1.87 | 1.77  | 4.98 | 0.04  | 0.02  | 0       |
| 14373  | 'G0s2'    | 7.28  | 9.14  | 5.39 | 27.1 | 3.43 | 0.11  | 19.5 | 10.36 | 0.05  | 2.29    |
| 14375  | 'Xrcc6'   | 20.94 | 20.68 | 7.33 | 21.6 | 21   | 8.48  | 2.3  | 15.91 | 22.34 | 25.03   |
| 14376  | 'Ganab'   | 33.62 | 22.62 | 21.4 | 23.4 | 28.6 | 17.74 | 23.5 | 27.21 | 27.84 | 27.86   |
| 14381  | 'G6pdx'   | 22.77 | 35.45 | 27.3 | 23.8 | 11.4 | 26.71 | 1.58 | 20.97 | 10.02 | 17.37   |
| 14385  | 'Slc37a4' | 7.74  | 10.9  | 11.5 | 10.8 | 3.39 | 19.58 | 14.1 | 10.37 | 21.87 | 4.27    |
| 14387  | 'Gaa'     | 964.3 | 1181  | 985  | 598  | 735  | 588.4 | 773  | 984.9 | 1024  | 1131.14 |
| 14388  | 'Gab1'    | 4.25  | 0.49  | 3.55 | 0    | 0.5  | 0     | 0    | 0.41  | 3.04  | 0.01    |
| 14389  | 'Gab2'    | 5.38  | 1.36  | 2.86 | 8.96 | 3.83 | 0.01  | 3.94 | 1.72  | 2.71  | 0       |
| 14390  | 'Gabpa'   | 7.83  | 2.6   | 2.59 | 0    | 1.88 | 2.39  | 3.05 | 1.3   | 4.01  | 7.14    |
| 14391  | 'Gabpb1'  | 17    | 16.58 | 15.4 | 3.47 | 10.7 | 18.4  | 6.27 | 12.8  | 5.74  | 10.61   |
| 14394  | 'Gabra1'  | 74.93 | 41.94 | 186  | 5.76 | 87.9 | 11.67 | 142  | 56.18 | 72.32 | 33.67   |

|       |            |       |       |      |      |      |       |      |       |       |         |
|-------|------------|-------|-------|------|------|------|-------|------|-------|-------|---------|
| 14395 | 'Gabra2'   | 60.23 | 75.01 | 29.2 | 11.5 | 9.36 | 27.61 | 43   | 37.51 | 39.05 | 48.73   |
| 14396 | 'Gabra3'   | 68.45 | 46.27 | 41.4 | 38.1 | 23.1 | 21.3  | 49   | 52.38 | 25.57 | 71.73   |
| 14397 | 'Gabra4'   | 16.76 | 11.49 | 14.9 | 21.6 | 7.81 | 9.56  | 11.5 | 19.51 | 10.81 | 23.21   |
| 14400 | 'Gabrb1'   | 134.4 | 131.1 | 103  | 58.4 | 61.1 | 89.48 | 139  | 175.6 | 84.49 | 83.69   |
| 14401 | 'Gabrb2'   | 13.88 | 9.95  | 30.7 | 4.25 | 23   | 3.97  | 12.9 | 9.54  | 10.82 | 6.28    |
| 14402 | 'Gabrb3'   | 12.54 | 9.38  | 7.79 | 11.9 | 10   | 4.9   | 5.29 | 5.33  | 5.88  | 6.5     |
| 14403 | 'Gabrd'    | 0.92  | 2.64  | 0    | 0    | 0    | 0     | 0    | 0     | 1.12  | 0       |
| 14404 | 'Gabre'    | 26.13 | 19.9  | 2.9  | 18.8 | 3.02 | 6.93  | 11.7 | 2.35  | 16.53 | 16.24   |
| 14405 | 'Gabrg1'   | 69.81 | 35.7  | 11   | 3.13 | 11.3 | 14.98 | 27.1 | 13.43 | 31.84 | 45.46   |
| 14406 | 'Gabrg2'   | 130.3 | 126.3 | 138  | 69.9 | 88.8 | 54.86 | 161  | 129.8 | 95.35 | 108.31  |
| 14407 | 'Gabrg3'   | 4.89  | 5.53  | 6.27 | 1.83 | 3.63 | 10.21 | 18.4 | 3.01  | 0.88  | 11.92   |
| 14409 | 'Gabbr2'   | 0     | 3.24  | 0    | 0    | 11.5 | 4.04  | 0    | 1.15  | 10.38 | 12.52   |
| 14415 | 'Gad1'     | 277.7 | 114.7 | 236  | 44.3 | 104  | 23.54 | 74.6 | 285.4 | 106.6 | 11.21   |
| 14417 | 'Gad2'     | 121.6 | 30.41 | 53.6 | 22.2 | 64.3 | 32.43 | 41.4 | 88.46 | 109.5 | 101.13  |
| 14419 | 'Gal'      | 1348  | 1976  | 1191 | 904  | 182  | 115.3 | 151  | 1404  | 446.6 | 240.42  |
| 14420 | 'Galc'     | 1.14  | 3.14  | 1.18 | 0.75 | 3.23 | 0.05  | 2.87 | 1.23  | 2.96  | 3.26    |
| 14421 | 'B4galnt1' | 41.01 | 58.94 | 43.3 | 14.8 | 26.2 | 48.2  | 45.6 | 24.6  | 67.52 | 32.97   |
| 14422 | 'B4galnt2' | 0.19  | 0.23  | 0.3  | 0.45 | 0.47 | 0.32  | 0.73 | 0.13  | 0.24  | 0.5     |
| 14423 | 'Galnt1'   | 5.95  | 3.79  | 4.16 | 6.39 | 5.5  | 1.45  | 11.4 | 1.72  | 6.87  | 9.72    |
| 14425 | 'Galnt3'   | 0     | 0     | 0    | 0    | 0    | 0     | 0.15 | 0     | 0     | 0       |
| 14426 | 'Galnt4'   | 0.7   | 0     | 1.2  | 0    | 0    | 0     | 0    | 0     | 0     | 0       |
| 14427 | 'Galr1'    | 8.2   | 18.8  | 23.8 | 0    | 0    | 75.9  | 45.5 | 51.7  | 49.6  | 60.3    |
| 14428 | 'Galr2'    | 0     | 2.4   | 17.5 | 0    | 0    | 0     | 0    | 0     | 9.4   | 0       |
| 14429 | 'Galr3'    | 0     | 0     | 0    | 13.6 | 0    | 0     | 0    | 0     | 0     | 0.9     |
| 14430 | 'Galt'     | 37.71 | 35.09 | 27.9 | 26.8 | 35.6 | 35.48 | 29.8 | 25.94 | 48.08 | 36.71   |
| 14431 | 'Gamt'     | 42.1  | 11.87 | 30.4 | 0    | 20   | 51.67 | 5.85 | 13.98 | 7.19  | 8.84    |
| 14432 | 'Gap43'    | 1080  | 1066  | 746  | 1410 | 1153 | 1539  | 817  | 1582  | 1141  | 1302.51 |
| 14433 | 'Gapdh'    | 2194  | 2252  | 2798 | 1387 | 2162 | 2788  | 2613 | 2251  | 1862  | 2094.59 |
| 14447 | 'Gapdhs'   | 0.09  | 0     | 0    | 0    | 2.07 | 0.03  | 0    | 1.38  | 0.03  | 1.21    |
| 14450 | 'Gart'     | 21.13 | 20.77 | 20.6 | 32   | 7.26 | 16.09 | 7.58 | 16.46 | 23.04 | 20.29   |
| 14451 | 'Gas1'     | 0.47  | 0     | 0.73 | 0    | 0.51 | 0     | 0.4  | 0     | 1.1   | 0       |
| 14453 | 'Gas2'     | 7.31  | 8.33  | 10.7 | 17.4 | 8.84 | 3.56  | 0.62 | 13.43 | 10.87 | 9.74    |
| 14456 | 'Gas6'     | 38.44 | 130.4 | 41.4 | 53.1 | 29.5 | 29.64 | 115  | 59.92 | 54.28 | 31.57   |
| 14457 | 'Gas7'     | 62.16 | 81.66 | 30.9 | 28.3 | 123  | 92.28 | 28   | 65.27 | 28.08 | 71.78   |
| 14459 | 'Gast'     | 21.7  | 172.8 | 0    | 47.3 | 3.59 | 15.57 | 0.12 | 33.26 | 6.71  | 11.71   |
| 14461 | 'Gata2'    | 0     | 0     | 0.01 | 0    | 0    | 0     | 0    | 0     | 0     | 0       |
| 14462 | 'Gata3'    | 0     | 0     | 0.04 | 0    | 0    | 0     | 0    | 0     | 0     | 0.09    |
| 14463 | 'Gata4'    | 0.01  | 0     | 0    | 0    | 0    | 0     | 0    | 0     | 0     | 0.01    |
| 14465 | 'Gata6'    | 0.01  | 0     | 0    | 0.02 | 0    | 0     | 0    | 0     | 0     | 0       |
| 14466 | 'Gba'      | 30.64 | 32.44 | 33.8 | 0.11 | 16.3 | 20.83 | 20.7 | 34.37 | 35.05 | 47.8    |
| 14467 | 'Nipsnap2' | 66.85 | 41.97 | 82.1 | 68   | 71.1 | 49.43 | 47.3 | 56.36 | 65.37 | 84.61   |
| 14469 | 'Gbp2'     | 0     | 0     | 1.09 | 0    | 0    | 4.81  | 0    | 0     | 0     | 0       |
| 14470 | 'Rabac1'   | 500.3 | 427.1 | 532  | 564  | 601  | 723.2 | 603  | 589.8 | 504.4 | 587.72  |
| 14472 | 'Gbx2'     | 0     | 0     | 0    | 0    | 0    | 0     | 0    | 1.49  | 0     | 0       |
| 14473 | 'Gc'       | 0     | 0.03  | 0    | 0    | 0    | 0.08  | 0    | 0     | 0.02  | 0       |
| 14479 | 'Usp15'    | 37.16 | 32.23 | 35.5 | 16.8 | 43.9 | 58.07 | 44.6 | 43.12 | 37.59 | 42.95   |
| 14489 | 'Mtpn'     | 47.95 | 57.55 | 49   | 59.6 | 67   | 18.67 | 54.4 | 52.43 | 44.24 | 63.55   |
| 14528 | 'Gch1'     | 1.41  | 0     | 0    | 1.47 | 0    | 0     | 4.71 | 0.16  | 4.92  | 0.61    |
| 14531 | 'Gcm1'     | 0.07  | 0.07  | 0.02 | 0.06 | 0.05 | 2.52  | 3.47 | 0.08  | 0.04  | 0       |
| 14533 | 'Bloc1s1'  | 108.6 | 127.1 | 193  | 209  | 164  | 151.6 | 143  | 142.1 | 139.7 | 183.97  |
| 14534 | 'Kat2a'    | 22.47 | 18.9  | 31.7 | 13.2 | 13.5 | 10.96 | 35.5 | 13.93 | 35.55 | 5.63    |
| 14536 | 'Nr6a1'    | 0     | 0     | 1.04 | 2.01 | 1.27 | 0     | 0    | 0     | 0     | 1.61    |
| 14537 | 'Gcnt1'    | 1.43  | 0     | 0    | 0    | 0    | 0.27  | 0    | 0     | 0     | 0       |
| 14538 | 'Gcnt2'    | 0     | 1.01  | 2.92 | 0    | 2.24 | 0.01  | 0.55 | 0     | 0.15  | 0       |
| 14539 | 'Opn1mw'   | 1.96  | 0     | 0    | 0    | 0    | 8.33  | 0    | 0     | 0     | 4.26    |
| 14544 | 'Gda'      | 30.55 | 22.64 | 16.8 | 28.6 | 9    | 1.44  | 14.3 | 12.44 | 2.69  | 7.28    |
| 14545 | 'Gdap1'    | 47.34 | 60.31 | 47.6 | 26   | 40   | 34.57 | 58.2 | 43.49 | 47.34 | 41.88   |
| 14547 | 'Gdap2'    | 22.66 | 28.39 | 15.2 | 8.29 | 14.9 | 5.25  | 12.3 | 19.94 | 8.89  | 18.64   |



|       |           |       |       |      |      |      |       |      |       |       |        |
|-------|-----------|-------|-------|------|------|------|-------|------|-------|-------|--------|
| 14548 | 'Mrps33'  | 167.8 | 167.2 | 155  | 202  | 215  | 220.7 | 130  | 167.5 | 195.8 | 209.18 |
| 14555 | 'Gpd1'    | 0.45  | 0.51  | 6.8  | 10.1 | 0.19 | 0.03  | 0    | 0.09  | 0.15  | 0.02   |
| 14559 | 'Gdf1'    | 21.23 | 0     | 34.1 | 27.5 | 0    | 0.01  | 0    | 9.67  | 0     | 0.01   |
| 14560 | 'Gdf10'   | 0     | 0     | 0.55 | 0    | 0    | 2.6   | 0    | 0     | 0     | 0      |
| 14561 | 'Gdf11'   | 1.49  | 0     | 0.05 | 0    | 2.98 | 0     | 0    | 0.67  | 0     | 1.73   |
| 14562 | 'Gdf3'    | 0.02  | 0     | 0    | 0    | 0.02 | 0     | 0    | 0     | 4.64  | 17.18  |
| 14566 | 'Gdf9'    | 0     | 4.34  | 2.78 | 0.51 | 0    | 1.22  | 0    | 0     | 3.37  | 9.1    |
| 14567 | 'Gdi1'    | 623.8 | 612.3 | 594  | 625  | 704  | 642.5 | 598  | 647.6 | 646.7 | 631.57 |
| 14569 | 'Gdi2'    | 76.92 | 77.23 | 103  | 91.1 | 84.7 | 88.38 | 112  | 81.54 | 91.56 | 90.59  |
| 14570 | 'Arhgdig' | 160   | 183.6 | 202  | 292  | 143  | 173.8 | 119  | 252.1 | 236.3 | 100.2  |
| 14571 | 'Gpd2'    | 16.96 | 23.08 | 24.4 | 32.3 | 17.3 | 9.89  | 17.5 | 27.06 | 7.7   | 22.85  |
| 14579 | 'Gem'     | 7.03  | 14.4  | 2.64 | 27.3 | 2.18 | 5.55  | 0.04 | 0.43  | 0     | 2.52   |
| 14580 | 'Gfap'    | 23.87 | 3.15  | 3.32 | 8.85 | 256  | 21.34 | 4.9  | 6.12  | 13.52 | 22.89  |
| 14583 | 'Gfpt1'   | 3.07  | 1.36  | 1.03 | 0.31 | 1.17 | 1.72  | 1.64 | 2.36  | 1.21  | 1.86   |
| 14584 | 'Gfpt2'   | 0.58  | 3.48  | 2.09 | 0.4  | 0.02 | 0     | 4.77 | 0     | 0     | 5.78   |
| 14585 | 'Gfra1'   | 33.49 | 15.91 | 40.6 | 15.3 | 18.8 | 10.49 | 16.4 | 21.07 | 33.14 | 15.35  |
| 14586 | 'Gfra2'   | 5.48  | 33.94 | 58.1 | 36.4 | 12.6 | 8.2   | 1.24 | 30.88 | 3.08  | 3.25   |
| 14587 | 'Gfra3'   | 1.94  | 0     | 0    | 0    | 0    | 0     | 0    | 0     | 0     | 0      |
| 14588 | 'Gfra4'   | 46.46 | 38.39 | 50.5 | 50.7 | 32.4 | 42.79 | 52.9 | 35.72 | 71.29 | 17     |
| 14590 | 'Ggh'     | 16.26 | 33.84 | 18.9 | 23.5 | 14.9 | 18.33 | 32.8 | 17.82 | 14.62 | 17.98  |
| 14593 | 'Ggps1'   | 29.13 | 37.83 | 19.7 | 20.8 | 41.5 | 36.4  | 17.6 | 26.94 | 50.32 | 31.61  |
| 14594 | 'Ggta1'   | 0.79  | 2.89  | 0    | 0    | 0    | 0     | 0    | 0     | 0     | 0      |
| 14595 | 'B4galt1' | 3.21  | 1.12  | 1.12 | 0.25 | 1.1  | 8.09  | 3.24 | 1.71  | 2.49  | 2.82   |
| 14600 | 'Ghr'     | 7.66  | 3.68  | 1.17 | 0.01 | 2.1  | 0.14  | 0.52 | 3.49  | 0.05  | 2.78   |
| 14601 | 'Ghrh'    | 8.82  | 102.5 | 1.5  | 259  | 0.51 | 5.7   | 0.49 | 22.61 | 0.03  | 0.07   |
| 14605 | 'Tsc22d3' | 88.18 | 49.72 | 89.1 | 46.3 | 91.1 | 78.64 | 50.6 | 84.87 | 32.77 | 34.74  |
| 14608 | 'Gpr83'   | 5.41  | 1.55  | 33.2 | 0.02 | 2.73 | 10.58 | 47.2 | 38.8  | 0     | 0.01   |
| 14609 | 'Gja1'    | 36.21 | 60.04 | 2.35 | 54.7 | 14.5 | 21.46 | 0.08 | 27.82 | 27.98 | 14.15  |
| 14612 | 'Gja4'    | 3.58  | 0     | 0    | 0    | 0    | 0     | 6.67 | 6.38  | 0     | 0      |
| 14615 | 'Gjc1'    | 0.02  | 0     | 0.02 | 0    | 0    | 0     | 0    | 0     | 0     | 0      |
| 14616 | 'Gja8'    | 0     | 0.15  | 0.27 | 0    | 0    | 0     | 0    | 0     | 0     | 0      |
| 14617 | 'Gjd2'    | 3.56  | 2.22  | 0.46 | 0    | 1.38 | 0     | 0    | 1.89  | 0.25  | 1.19   |
| 14618 | 'Gjb1'    | 6.06  | 8.15  | 0    | 0    | 3.76 | 8.49  | 0    | 0     | 0     | 0.14   |
| 14619 | 'Gjb2'    | 0     | 0     | 0    | 0    | 0.8  | 0     | 0    | 1.01  | 0     | 0      |
| 14623 | 'Gjb6'    | 31.04 | 37.21 | 12.9 | 0    | 0.39 | 37.52 | 15.4 | 27.35 | 7.38  | 0      |
| 14628 | 'Ostm1'   | 33.86 | 31.97 | 23.4 | 16.9 | 22.9 | 22.61 | 11.9 | 37.98 | 38.03 | 57.09  |
| 14629 | 'Gclc'    | 4.17  | 1.3   | 8.57 | 16.4 | 4.45 | 4.05  | 0.53 | 7.18  | 3.65  | 2.48   |
| 14630 | 'Gclm'    | 4.47  | 6.12  | 2.93 | 4.32 | 4.78 | 1.39  | 3.5  | 1.12  | 2.92  | 0.82   |
| 14632 | 'Gli1'    | 0     | 0.63  | 0.66 | 0.03 | 0    | 0.74  | 0    | 0     | 0     | 0.07   |
| 14633 | 'Gli2'    | 0.01  | 0.03  | 0    | 0.01 | 0    | 0     | 0.06 | 0     | 0.05  | 0      |
| 14634 | 'Gli3'    | 0.93  | 0     | 0    | 0.18 | 0.64 | 0.96  | 0.01 | 0     | 1.1   | 0.21   |
| 14635 | 'Galk1'   | 12.49 | 12.08 | 7.02 | 29.7 | 21.8 | 26.88 | 27.5 | 16.26 | 12.04 | 31.47  |
| 14645 | 'Glul'    | 114.9 | 81.61 | 39.3 | 58.4 | 51.9 | 165   | 82.8 | 63.29 | 76.68 | 41.72  |
| 14651 | 'Hagh'    | 221.7 | 227.3 | 253  | 181  | 163  | 259.7 | 163  | 226.9 | 240.9 | 296.5  |
| 14652 | 'Glp1r'   | 0.76  | 0.69  | 0    | 0    | 0    | 0.09  | 0    | 0     | 0     | 0      |
| 14654 | 'Glr1'    | 0.4   | 1.06  | 0.4  | 0    | 0.16 | 0.17  | 0.83 | 0.27  | 0     | 0.07   |
| 14657 | 'Glr4'    | 0.03  | 0     | 2.85 | 0    | 0.93 | 0.01  | 0    | 0     | 0     | 0      |
| 14658 | 'Glrb'    | 47.91 | 41.55 | 94.9 | 33.3 | 33.2 | 27.65 | 45.9 | 48.19 | 92    | 46.85  |
| 14660 | 'Gls'     | 10.91 | 5.02  | 14.2 | 17.1 | 14   | 10.74 | 24.2 | 10.75 | 16.04 | 10.22  |
| 14661 | 'Glud1'   | 38.22 | 48.96 | 55.8 | 48.7 | 20.7 | 26.74 | 59.2 | 6.9   | 50.06 | 20.36  |
| 14664 | 'Slc6a9'  | 14.31 | 17.67 | 4.39 | 10.4 | 8.65 | 27.65 | 16.3 | 17.83 | 12.12 | 3.43   |
| 14667 | 'Gm2a'    | 17.02 | 12.28 | 40.6 | 19.5 | 9.87 | 14.02 | 43.1 | 19.32 | 6.99  | 7.69   |
| 14670 | 'Gnl1'    | 34.42 | 37.58 | 23.6 | 58.5 | 44.3 | 24.18 | 25.5 | 21.47 | 20.96 | 26.67  |
| 14672 | 'Gna11'   | 47.26 | 62.16 | 63.8 | 97.9 | 67   | 55.92 | 54.4 | 88.12 | 43.85 | 48.69  |
| 14673 | 'Gna12'   | 5.03  | 0     | 2.18 | 6.33 | 3.79 | 0.02  | 0.08 | 0     | 0     | 0.71   |
| 14674 | 'Gna13'   | 4.42  | 0.37  | 3.22 | 10.2 | 2.63 | 5.67  | 2.57 | 2.84  | 2.6   | 1.24   |
| 14675 | 'Gna14'   | 0     | 2.18  | 0.01 | 0    | 0    | 0     | 0    | 3.05  | 0     | 0      |
| 14676 | 'Gna15'   | 0     | 0     | 0    | 0    | 0.05 | 3.91  | 0    | 0     | 0     | 0      |

|       |           |       |       |      |      |      |       |      |       |       |         |
|-------|-----------|-------|-------|------|------|------|-------|------|-------|-------|---------|
| 14677 | 'Gnai1'   | 32.55 | 31.04 | 8.72 | 25.5 | 17.2 | 13.27 | 30.9 | 15.58 | 69.38 | 12.35   |
| 14678 | 'Gnai2'   | 45.34 | 31.32 | 30.7 | 52.6 | 45.3 | 49.02 | 43   | 49.98 | 46.37 | 51.7    |
| 14679 | 'Gnai3'   | 9.53  | 17.3  | 13   | 7.74 | 13.7 | 0.01  | 7.67 | 9.47  | 5.97  | 13.63   |
| 14680 | 'Gnal'    | 12.89 | 9.85  | 5.8  | 8.24 | 6.82 | 3.65  | 10.5 | 1.93  | 7.39  | 6.67    |
| 14681 | 'Gnao1'   | 66.16 | 64.44 | 67.4 | 49.9 | 71.2 | 32.3  | 73.9 | 47.45 | 58.42 | 47.03   |
| 14682 | 'Gnaq'    | 44.29 | 51.25 | 27.5 | 48.8 | 39.6 | 37.2  | 31.4 | 31.34 | 28.12 | 32.61   |
| 14683 | 'Gnas'    | 773.3 | 644.3 | 555  | 630  | 701  | 817.7 | 664  | 574.2 | 785.5 | 745.97  |
| 14686 | 'Gnat2'   | 0     | 0     | 0    | 0    | 1.02 | 0     | 0    | 0     | 0     | 0       |
| 14687 | 'Gnaz'    | 45.4  | 58.85 | 37.1 | 98.5 | 39.2 | 24.69 | 51.4 | 38.43 | 58.3  | 18.62   |
| 14688 | 'Gnb1'    | 507.9 | 485.6 | 378  | 548  | 627  | 541.5 | 404  | 580.8 | 599.3 | 600.8   |
| 14693 | 'Gnb2'    | 38.8  | 29.13 | 33.8 | 62.3 | 56.8 | 26.16 | 44.3 | 39.27 | 55.45 | 43.35   |
| 14694 | 'Rack1'   | 97.93 | 131.6 | 86.1 | 136  | 88.3 | 83.44 | 80.2 | 110.3 | 105.5 | 113.34  |
| 14695 | 'Gnb3'    | 1.01  | 0     | 7.69 | 0    | 0    | 0     | 0.44 | 0.11  | 0     | 2.27    |
| 14696 | 'Gnb4'    | 5.77  | 28.75 | 17.4 | 5.16 | 17.8 | 3.44  | 20.6 | 11.68 | 52.92 | 37.39   |
| 14697 | 'Gnb5'    | 99.52 | 79.04 | 122  | 101  | 96.9 | 122.9 | 98.6 | 90.8  | 102.9 | 91.21   |
| 14699 | 'Gngt1'   | 0     | 0     | 0    | 0    | 0    | 0     | 0    | 0     | 0.05  | 0       |
| 14700 | 'Gng10'   | 70.48 | 140.1 | 49   | 231  | 58.6 | 109.9 | 68.3 | 94.91 | 23.48 | 81.87   |
| 14701 | 'Gng12'   | 2.35  | 2.96  | 5.94 | 11.1 | 1.19 | 1.53  | 4.85 | 3.18  | 3.15  | 1.05    |
| 14702 | 'Gng2'    | 74.96 | 68.38 | 53.9 | 46.4 | 61.6 | 61.02 | 49.5 | 72.74 | 69.21 | 65.8    |
| 14704 | 'Gng3'    | 586.7 | 512.1 | 509  | 754  | 526  | 637.4 | 528  | 585.9 | 475   | 543.11  |
| 14705 | 'Bscl2'   | 195.5 | 213.5 | 134  | 205  | 118  | 222.6 | 179  | 219.5 | 248.4 | 238.7   |
| 14706 | 'Gng4'    | 51.32 | 36.14 | 30.6 | 39.9 | 20.6 | 16.64 | 3.59 | 18.98 | 31.69 | 22.35   |
| 14707 | 'Gng5'    | 68.77 | 54.99 | 53   | 51.8 | 30.9 | 122.4 | 90   | 33.81 | 68.74 | 61.92   |
| 14708 | 'Gng7'    | 11.45 | 14.4  | 4.76 | 0.18 | 2.29 | 1.68  | 6.06 | 7.25  | 6.54  | 4.62    |
| 14709 | 'Gng8'    | 2.14  | 0     | 0    | 13.9 | 68.3 | 92.18 | 1.29 | 0.05  | 38.5  | 84.92   |
| 14710 | 'Gngt2'   | 8.51  | 12.6  | 0    | 33.6 | 13.5 | 21.6  | 7.08 | 0.09  | 0     | 5.78    |
| 14711 | 'Gnmt'    | 0     | 0     | 8.8  | 0    | 4.88 | 0     | 13   | 0.73  | 0     | 3.33    |
| 14712 | 'Gnpat'   | 31.13 | 16.89 | 26.1 | 28.8 | 28.5 | 21.26 | 34.7 | 35.71 | 36.34 | 26.85   |
| 14714 | 'Gnrh1'   | 0.94  | 0.28  | 4.52 | 0.99 | #### | 84.26 | 9.39 | 1.7   | 1.58  | 1836.64 |
| 14718 | 'Got1'    | 225.5 | 195.4 | 304  | 155  | 204  | 433   | 352  | 323.3 | 259.6 | 251.77  |
| 14719 | 'Got2'    | 124   | 149.7 | 211  | 106  | 145  | 173.2 | 237  | 176.3 | 148.9 | 104     |
| 14723 | 'Gp1ba'   | 0.86  | 0     | 0.4  | 0    | 0    | 0     | 0    | 0     | 0     | 0.31    |
| 14724 | 'Gp1bb'   | 0.35  | 0     | 0.89 | 5.33 | 0    | 0     | 0    | 0.67  | 0.5   | 0.04    |
| 14725 | 'Lrp2'    | 0     | 0.22  | 0    | 0    | 0    | 0     | 0    | 0.01  | 0     | 0       |
| 14726 | 'Pdpr'    | 6.5   | 5.27  | 8.49 | 22.1 | 7.22 | 4.86  | 9.98 | 3.48  | 0.74  | 0.05    |
| 14728 | 'Lilrb4a' | 0     | 0     | 0.03 | 0    | 0    | 0     | 0    | 0     | 0     | 0       |
| 14729 | 'Gp5'     | 0.92  | 0.44  | 0    | 0    | 0    | 4.14  | 1.45 | 1.36  | 6.99  | 0.7     |
| 14731 | 'Gpaa1'   | 44.94 | 34.56 | 52   | 27.3 | 45.8 | 25.61 | 10.3 | 34.49 | 17.69 | 31.57   |
| 14732 | 'Gpam'    | 2.44  | 2.21  | 2.16 | 5.72 | 0.78 | 1.75  | 2.41 | 2.65  | 4.86  | 2.37    |
| 14733 | 'Gpc1'    | 3.56  | 4.02  | 13.7 | 8.45 | 8.75 | 8.77  | 11.8 | 5.74  | 8.04  | 8.66    |
| 14734 | 'Gpc3'    | 14.91 | 20    | 49   | 61.5 | 11.6 | 0.04  | 34   | 46.25 | 2.88  | 14.25   |
| 14735 | 'Gpc4'    | 2.84  | 0.75  | 13.5 | 0.54 | 0.01 | 4.05  | 0    | 9.9   | 6.52  | 0.14    |
| 14738 | 'Gpr12'   | 3.43  | 1.06  | 6.52 | 0    | 10.3 | 9.45  | 2.83 | 9.34  | 7.6   | 3.88    |
| 14739 | 'S1pr2'   | 0     | 0.49  | 5.66 | 0    | 0    | 0     | 0    | 2.84  | 0     | 0       |
| 14744 | 'Gpr65'   | 0     | 0     | 0    | 0    | 0    | 0     | 0    | 0     | 0     | 0.02    |
| 14745 | 'Lpar1'   | 4.38  | 2.11  | 1.76 | 0    | 20.4 | 1.71  | 7.66 | 1.78  | 1.75  | 2.65    |
| 14747 | 'Cmklr1'  | 0     | 0     | 0    | 0    | 0    | 0.13  | 0    | 0.22  | 0     | 0       |
| 14748 | 'Gpr3'    | 0.02  | 1.34  | 12.8 | 0    | 0    | 0     | 0.16 | 0     | 0.68  | 3.79    |
| 14751 | 'Gpi1'    | 194   | 181.4 | 343  | 120  | 204  | 232.6 | 294  | 243   | 240.4 | 275.24  |
| 14755 | 'Pigq'    | 30.84 | 17.85 | 22.8 | 15.4 | 20.9 | 15.61 | 16.3 | 13.78 | 12.87 | 32.09   |
| 14756 | 'Gpld1'   | 32.34 | 18.94 | 22   | 51.6 | 5.52 | 14.5  | 11.9 | 16.19 | 20.98 | 15.18   |
| 14758 | 'Gpm6b'   | 79.31 | 60.21 | 54.9 | 63.7 | 102  | 97.07 | 93   | 52.18 | 42.15 | 48.58   |
| 14760 | 'Gpr19'   | 31.43 | 41.43 | 20.4 | 64.4 | 15.9 | 26.57 | 30   | 33.95 | 16.04 | 45.36   |
| 14761 | 'Gpr27'   | 0.68  | 0.91  | 0.17 | 0.41 | 0.62 | 0     | 0    | 0.11  | 0.35  | 0.12    |
| 14763 | 'Gpr37'   | 8.35  | 21.87 | 1.97 | 0.63 | 0.15 | 19.53 | 1.25 | 5.43  | 0.3   | 0.01    |
| 14765 | 'Gpr50'   | 0     | 0     | 0.02 | 32.2 | 0    | 0     | 0    | 0     | 0     | 0       |
| 14766 | 'Adgrg1'  | 33.13 | 58.3  | 44.8 | 24.1 | 52.3 | 29.77 | 43.5 | 33.45 | 32.86 | 64.51   |
| 14768 | 'Lancl1'  | 55.55 | 46.45 | 68.7 | 59.5 | 50   | 82.35 | 69.6 | 62.99 | 48.79 | 56.54   |

|       |          |       |       |      |      |      |       |      |       |       |         |
|-------|----------|-------|-------|------|------|------|-------|------|-------|-------|---------|
| 14772 | 'Grk4'   | 13.18 | 16.68 | 16.7 | 29.3 | 20.7 | 20.08 | 17.9 | 10.44 | 15.2  | 16.03   |
| 14773 | 'Grk5'   | 0.01  | 1.64  | 0.33 | 0    | 0    | 0     | 2    | 0.01  | 0.95  | 0       |
| 14775 | 'Gpx1'   | 218.6 | 179.2 | 208  | 212  | 259  | 242.9 | 211  | 200.3 | 242.9 | 314.26  |
| 14776 | 'Gpx2'   | 0     | 0     | 0    | 4.14 | 0    | 0.18  | 0    | 0     | 0     | 0       |
| 14778 | 'Gpx3'   | 973.3 | 1167  | 589  | 814  | 602  | 1059  | 595  | 929.7 | 1050  | 1290.07 |
| 14780 | 'Gpx5'   | 0     | 0     | 0    | 0    | 0    | 0     | 0    | 0     | 0.13  | 0       |
| 14782 | 'Gsr'    | 5.71  | 6.8   | 4.93 | 8.66 | 6.28 | 4.61  | 8.24 | 6.05  | 9.52  | 4.64    |
| 14783 | 'Grb10'  | 28.6  | 36.92 | 38.7 | 12.5 | 22   | 11.65 | 49.6 | 24.32 | 31.59 | 38.33   |
| 14784 | 'Grb2'   | 30.86 | 31.98 | 19.5 | 37.9 | 22.5 | 17.52 | 22.7 | 19.92 | 35.25 | 29.91   |
| 14786 | 'Grb7'   | 0     | 0.02  | 0    | 0    | 0    | 0     | 0    | 0     | 0     | 0       |
| 14787 | 'Rhpn1'  | 11.28 | 7.89  | 8.97 | 5.85 | 7.42 | 6.07  | 0.02 | 8.51  | 7.26  | 9.84    |
| 14788 | 'Gpr162' | 0.72  | 0.66  | 1    | 1.61 | 2.16 | 0.17  | 1.45 | 1.18  | 5.96  | 1.03    |
| 14789 | 'P3h3'   | 0.37  | 3.6   | 2.93 | 2.64 | 5.84 | 2.17  | 14.2 | 9.33  | 5.21  | 11.52   |
| 14790 | 'Grcc10' | 638.4 | 654.3 | 524  | 595  | 671  | 746   | 625  | 458.5 | 615.2 | 655.86  |
| 14791 | 'Emg1'   | 50.37 | 38.75 | 49.9 | 24.2 | 41.7 | 82.92 | 50.6 | 36.85 | 38.37 | 36.17   |
| 14792 | 'Lpcat3' | 7.94  | 13.8  | 13.8 | 0.03 | 7.34 | 21.41 | 3.59 | 6.17  | 5.54  | 7.05    |
| 14793 | 'Cdca3'  | 0     | 0     | 0    | 0.12 | 0    | 0     | 0    | 0     | 0.06  | 1.82    |
| 14794 | 'Spsb2'  | 9.14  | 6.97  | 3.64 | 3.58 | 7.91 | 26.56 | 9.13 | 2.21  | 12.78 | 30.15   |
| 14797 | 'Aes'    | 45.74 | 91.2  | 122  | 73.4 | 93.5 | 76.6  | 156  | 83.34 | 69.81 | 54.74   |
| 14799 | 'Gria1'  | 33.89 | 48.14 | 44.6 | 31.7 | 31.3 | 20.84 | 31.2 | 39.52 | 59.13 | 43.85   |
| 14800 | 'Gria2'  | 166.8 | 147.7 | 104  | 94.1 | 162  | 77.3  | 161  | 146.7 | 185.6 | 174.72  |
| 14802 | 'Gria4'  | 11.88 | 9.32  | 25.4 | 9.9  | 19.6 | 17.93 | 29.1 | 12.52 | 16.61 | 15.85   |
| 14803 | 'Grid1'  | 9.06  | 7.33  | 13   | 20.4 | 4.84 | 8.3   | 6.51 | 4.06  | 7.52  | 9.69    |
| 14804 | 'Grid2'  | 3.48  | 2.53  | 7.98 | 0.62 | 4.48 | 5.33  | 3.9  | 1.94  | 3.13  | 1.91    |
| 14805 | 'Grik1'  | 40.4  | 23.7  | 9.88 | 9.59 | 7.49 | 14.2  | 16.3 | 30.54 | 0.04  | 22.58   |
| 14806 | 'Grik2'  | 5.95  | 8.88  | 6.22 | 0.01 | 7.07 | 2.62  | 6.38 | 7.76  | 7.86  | 1.06    |
| 14807 | 'Grik3'  | 2.01  | 3.42  | 0.54 | 0.68 | 1.45 | 0.14  | 0.01 | 0.8   | 0     | 0.01    |
| 14809 | 'Grik5'  | 3.41  | 2.98  | 1.71 | 0.18 | 3.05 | 3.98  | 0.95 | 1.31  | 2.04  | 3.41    |
| 14810 | 'Grin1'  | 99.54 | 65.27 | 138  | 16.4 | 64.5 | 45.53 | 109  | 61.58 | 91.21 | 36.78   |
| 14811 | 'Grin2a' | 2.29  | 1.66  | 4.29 | 0    | 0.73 | 0.43  | 0.03 | 0     | 0.3   | 0.55    |
| 14812 | 'Grin2b' | 7.39  | 6.28  | 11.4 | 11.2 | 6.12 | 14.15 | 9.37 | 5.17  | 7.07  | 8       |
| 14813 | 'Grin2c' | 0     | 0.44  | 3.12 | 0    | 0    | 0.33  | 0    | 0     | 1.6   | 0.01    |
| 14814 | 'Grin2d' | 0.11  | 0.24  | 0.76 | 1.25 | 0.54 | 0.25  | 0.85 | 0.16  | 1.49  | 0.24    |
| 14815 | 'Nr3c1'  | 15.26 | 7.26  | 16.5 | 16.8 | 5.48 | 5.19  | 5.24 | 7.05  | 8.26  | 7.4     |
| 14816 | 'Grm1'   | 1.31  | 3.4   | 9.23 | 1.01 | 8.83 | 8.68  | 33.2 | 9.85  | 15.8  | 1.37    |
| 14823 | 'Grm8'   | 0.55  | 4.49  | 8.21 | 1.72 | 3.04 | 5.74  | 7.89 | 14.72 | 0.01  | 1.15    |
| 14824 | 'Grn'    | 19.66 | 33.81 | 31.5 | 18.4 | 20.6 | 55.3  | 14.2 | 42.41 | 25.07 | 21.55   |
| 14825 | 'Cxcl1'  | 0     | 0     | 0    | 8.72 | 0    | 0     | 0.05 | 0     | 0     | 0       |
| 14827 | 'Pdia3'  | 245.5 | 302.7 | 155  | 271  | 180  | 191.4 | 166  | 168.4 | 259.3 | 312.03  |
| 14828 | 'Hspa5'  | 421.1 | 625   | 286  | 502  | 251  | 381.4 | 265  | 282.2 | 493   | 655.53  |
| 14829 | 'Grpr'   | 0.92  | 0     | 3.85 | 0    | 0.85 | 0     | 7.9  | 0.02  | 0     | 0       |
| 14840 | 'Gsg1'   | 0     | 0     | 0.08 | 0    | 0    | 3.76  | 0.04 | 0.7   | 0     | 0.48    |
| 14842 | 'Gsx1'   | 0     | 0     | 3.41 | 0    | 0.03 | 0     | 4.91 | 0     | 0     | 0       |
| 14843 | 'Gsx2'   | 0     | 0     | 0    | 0    | 2.18 | 0     | 0.03 | 0     | 0     | 0       |
| 14852 | 'Gspt1'  | 5.63  | 1.62  | 2.61 | 0.6  | 1.2  | 2.71  | 1.65 | 2.85  | 1.4   | 0.63    |
| 14853 | 'Gspt2'  | 19.2  | 20.93 | 12.3 | 13.5 | 3.83 | 22.43 | 31.8 | 11.09 | 14.75 | 6.61    |
| 14854 | 'Gss'    | 19.8  | 22.31 | 13.9 | 8.9  | 28.9 | 24.15 | 5.32 | 11.89 | 20.11 | 22.37   |
| 14857 | 'Gsta1'  | 0     | 0     | 0    | 0    | 0    | 0     | 0.06 | 0     | 0     | 0       |
| 14859 | 'Gsta3'  | 0     | 0     | 1.85 | 4.86 | 0.15 | 4.4   | 0    | 0     | 0.35  | 1.87    |
| 14860 | 'Gsta4'  | 16.41 | 61.56 | 43.6 | 15.5 | 35.1 | 90.76 | 30.9 | 46.03 | 13.65 | 26.46   |
| 14862 | 'Gstm1'  | 257.6 | 157.4 | 164  | 311  | 101  | 441.7 | 277  | 178.9 | 152.5 | 154.2   |
| 14863 | 'Gstm2'  | 0.04  | 6.58  | 0.09 | 5.64 | 0    | 0.14  | 21.2 | 1.94  | 0.04  | 4.18    |
| 14864 | 'Gstm3'  | 0.04  | 4.67  | 0    | 0    | 0    | 0     | 0    | 0     | 0     | 0       |
| 14865 | 'Gstm4'  | 22.74 | 29.16 | 23.7 | 50   | 22.9 | 37.93 | 24.6 | 44.3  | 38.8  | 32.34   |
| 14866 | 'Gstm5'  | 297.6 | 359.7 | 288  | 381  | 271  | 414.6 | 323  | 421.8 | 247.7 | 253.04  |
| 14867 | 'Gstm6'  | 142.6 | 138.7 | 159  | 262  | 97.3 | 111.7 | 64.4 | 139.1 | 83.97 | 71.42   |
| 14869 | 'Gstp2'  | 19.77 | 13.9  | 1.46 | 0.31 | 0.7  | 3.87  | 0.11 | 3.53  | 0     | 1.89    |
| 14870 | 'Gstp1'  | 1307  | 1327  | 1001 | 1022 | 1335 | 1747  | 1219 | 1221  | 1082  | 1368.34 |

|       |             |       |       |      |      |      |       |      |       |       |        |
|-------|-------------|-------|-------|------|------|------|-------|------|-------|-------|--------|
| 14871 | 'Gstt1'     | 19.59 | 34.03 | 38.5 | 29.5 | 8.38 | 19.11 | 20.7 | 8.93  | 16.86 | 12.14  |
| 14872 | 'Gstt2'     | 9.08  | 12.35 | 6.78 | 16.2 | 5.88 | 39.35 | 28.7 | 9.83  | 19.1  | 36.51  |
| 14873 | 'Gsto1'     | 85.09 | 102.7 | 124  | 47.7 | 35.7 | 91.58 | 184  | 123.1 | 131.4 | 66.66  |
| 14874 | 'Gstz1'     | 40.49 | 50.56 | 45.7 | 47.1 | 29.2 | 72.48 | 9.39 | 51.84 | 50.92 | 28.65  |
| 14884 | 'Gtf2h1'    | 16    | 19.53 | 11.2 | 25.1 | 6.16 | 11.18 | 19.3 | 15.67 | 11.48 | 19.1   |
| 14885 | 'Gtf2h4'    | 21.57 | 8.39  | 19.7 | 0    | 22.2 | 20.25 | 24.6 | 12.66 | 11.14 | 10.51  |
| 14886 | 'Gtf2i'     | 28.8  | 22.32 | 21.3 | 36.4 | 23.1 | 17.19 | 23.8 | 14.84 | 30.61 | 20.69  |
| 14894 | 'Cfap20'    | 131.2 | 155.5 | 129  | 195  | 124  | 109.2 | 81.7 | 125.5 | 77.42 | 108.74 |
| 14897 | 'Trip12'    | 3.93  | 6.64  | 9.28 | 11.6 | 4.62 | 4.52  | 12.1 | 4.52  | 4.92  | 4.68   |
| 14904 | 'Gtpbp1'    | 11.29 | 2.07  | 4.4  | 0    | 3.62 | 1.08  | 6.31 | 3.18  | 4.11  | 3.51   |
| 14911 | 'Thumpd3'   | 26.8  | 25.98 | 40.6 | 28.1 | 19.8 | 6.43  | 16.8 | 26.97 | 27.09 | 24.94  |
| 14912 | 'Nkx6-2'    | 9.2   | 3.56  | 0.19 | 0.18 | 0.88 | 10.65 | 4.34 | 0.5   | 1.91  | 0      |
| 14913 | 'Guca1a'    | 0     | 0.88  | 0    | 0    | 0    | 0     | 0    | 0     | 0     | 0      |
| 14919 | 'Gucy2e'    | 0.78  | 0.21  | 0.97 | 0    | 0.79 | 0     | 0.23 | 0.3   | 0.49  | 0      |
| 14923 | 'Guk1'      | 283.5 | 289.9 | 291  | 275  | 310  | 361.3 | 219  | 317.5 | 216.6 | 303.34 |
| 14924 | 'Magi1'     | 20.09 | 36.77 | 17.1 | 22.6 | 18.8 | 11.19 | 28.2 | 23.14 | 25.61 | 17.66  |
| 14933 | 'Gk'        | 6.29  | 4.59  | 11   | 5.53 | 3.37 | 0.69  | 4.71 | 6.07  | 0     | 4.56   |
| 14934 | 'Gypa'      | 0     | 0.95  | 0    | 0    | 0    | 0     | 0    | 0     | 0     | 0      |
| 14936 | 'Gys1'      | 8.65  | 6.01  | 8.4  | 3.86 | 0.04 | 5.84  | 1.89 | 1.78  | 1.55  | 6.06   |
| 14938 | 'Gzma'      | 0     | 0     | 0    | 0    | 0    | 0     | 0    | 0     | 0.05  | 0      |
| 14945 | 'Gzmk'      | 0     | 2.17  | 0    | 0    | 0    | 0     | 0    | 0     | 0     | 0.23   |
| 14950 | 'H13'       | 133.8 | 122.8 | 63.3 | 98.4 | 81.4 | 121.9 | 115  | 110.7 | 132.9 | 154.06 |
| 14957 | 'Hist1h1d'  | 0     | 0     | 0    | 0    | 0    | 3.92  | 0    | 0     | 0     | 0      |
| 14958 | 'H1f0'      | 19.92 | 28.06 | 31.4 | 34.6 | 41.1 | 35.92 | 24.3 | 38.45 | 39.93 | 23.25  |
| 14960 | 'H2-Aa'     | 0     | 0     | 0    | 0    | 2.28 | 0     | 0    | 0     | 0     | 0      |
| 14961 | 'H2-Ab1'    | 0     | 0     | 0    | 0    | 0    | 9.44  | 0    | 0     | 0     | 0      |
| 14962 | 'Cfb'       | 0     | 0     | 0    | 0.82 | 0.11 | 2.7   | 0    | 0     | 0     | 0.2    |
| 14963 | 'H2-BI'     | 0.12  | 0     | 3.73 | 4.03 | 7.81 | 0     | 0    | 0     | 1.78  | 0      |
| 14964 | 'H2-D1'     | 70.01 | 41.7  | 82.2 | 133  | 64.5 | 223.8 | 83.5 | 34.4  | 339.7 | 362.98 |
| 14969 | 'H2-Eb1'    | 0.05  | 0.03  | 0    | 6.03 | 0.45 | 0.03  | 0    | 2.18  | 6.79  | 0      |
| 14972 | 'H2-K1'     | 4.29  | 1.69  | 9.03 | 22.3 | 9.37 | 31.34 | 6.82 | 0.34  | 14.37 | 25.17  |
| 14976 | 'Pfdn6'     | 187.3 | 100.3 | 147  | 168  | 240  | 139.6 | 214  | 254.6 | 196.2 | 123.24 |
| 14977 | 'Slc39a7'   | 50    | 98.05 | 109  | 67.5 | 74.9 | 105.4 | 87.7 | 85.4  | 100.2 | 125.56 |
| 14979 | 'H2-Ke6'    | 10.25 | 4.91  | 9.69 | 32.9 | 19.8 | 25.04 | 12.5 | 18.31 | 24.94 | 11.57  |
| 14991 | 'H2-M3'     | 19.49 | 3.56  | 0    | 13.3 | 2.28 | 12.16 | 0    | 3.6   | 5.57  | 14.87  |
| 14998 | 'H2-DMa'    | 3.83  | 8.75  | 9.81 | 28.3 | 5.01 | 26.24 | 1.34 | 11.95 | 3.76  | 11.7   |
| 14999 | 'H2-DMb1'   | 0.35  | 0     | 2.52 | 0    | 0    | 7.06  | 6.25 | 5.36  | 0     | 0      |
| 15000 | 'H2-DMb2'   | 0     | 0     | 10.7 | 0    | 0    | 0     | 0    | 0     | 0     | 0      |
| 15006 | 'H2-Q1'     | 0.09  | 0     | 0.08 | 0.25 | 0.09 | 0.27  | 0.15 | 0.07  | 0.26  | 0.4    |
| 15007 | 'H2-Q10'    | 0     | 0     | 0    | 0    | 0    | 0     | 0    | 0     | 0.06  | 0      |
| 15013 | 'H2-Q2'     | 31.12 | 19.62 | 24.8 | 50.9 | 10.7 | 10.36 | 0.05 | 14.21 | 17.94 | 11.18  |
| 15015 | 'H2-Q4'     | 16.97 | 18.92 | 18.7 | 20   | 26.6 | 20.32 | 18.9 | 12.23 | 29.57 | 17.52  |
| 15018 | 'H2-Q7'     | 0     | 0     | 0    | 0    | 0    | 0.11  | 0    | 0.95  | 0.03  | 1.18   |
| 15019 | 'H2-Q8'     | 2.86  | 0     | 0    | 0    | 0    | 0     | 0    | 0.25  | 0     | 0      |
| 15024 | 'H2-T10'    | 0.92  | 0.22  | 0.95 | 2.56 | 1.3  | 0.94  | 0.47 | 1.45  | 3.15  | 0.99   |
| 15033 | 'H2-T18'    | 0.04  | 0.05  | 0.07 | 0.3  | 0.01 | 0.13  | 0.02 | 0     | 0.08  | 0.02   |
| 15039 | 'H2-T22'    | 6.47  | 8.05  | 13.9 | 38.1 | 31.2 | 0.06  | 12.9 | 4.42  | 12.04 | 23.61  |
| 15040 | 'H2-T23'    | 18.86 | 35.6  | 47.3 | 133  | 21.4 | 70.14 | 37.2 | 26.98 | 52.45 | 24.95  |
| 15042 | 'H2-T24'    | 0.89  | 4.6   | 3.38 | 0.79 | 1.85 | 2.67  | 3.57 | 1.49  | 1.58  | 0.86   |
| 15064 | 'Mr1'       | 0     | 3.94  | 0    | 0    | 0    | 6.03  | 0    | 0     | 1.39  | 1.45   |
| 15077 | 'Hist2h3c1' | 0     | 0     | 0    | 0    | 0    | 0     | 0    | 0     | 1.04  | 0      |
| 15078 | 'H3f3a'     | 144.6 | 191.2 | 111  | 157  | 147  | 125.5 | 174  | 149.5 | 62.64 | 124.33 |
| 15081 | 'H3f3b'     | 254.5 | 364.1 | 345  | 508  | 386  | 430.6 | 292  | 341.4 | 411.8 | 349.91 |
| 15107 | 'Hadh'      | 8.65  | 0     | 5.84 | 11.7 | 9.8  | 14.25 | 0.03 | 3.18  | 5.43  | 5.15   |
| 15108 | 'Hsd17b10'  | 63.95 | 66.07 | 33.9 | 84.9 | 60.3 | 45.35 | 82.6 | 76.86 | 53.97 | 55.43  |
| 15109 | 'Hal'       | 0     | 0     | 0    | 1.67 | 0    | 0     | 0    | 0     | 0     | 0      |
| 15114 | 'Hap1'      | 225.1 | 282.2 | 282  | 111  | 209  | 98.42 | 226  | 354.8 | 345.6 | 272.72 |
| 15115 | 'Hars'      | 89.35 | 87.11 | 102  | 111  | 84.5 | 160.1 | 114  | 87.85 | 109.8 | 107.18 |

|       |              |       |       |      |      |      |       |      |       |       |       |
|-------|--------------|-------|-------|------|------|------|-------|------|-------|-------|-------|
| 15116 | 'Has1'       | 0     | 0.11  | 1.06 | 0    | 0.25 | 0.83  | 4.16 | 0.04  | 6.46  | 2.24  |
| 15117 | 'Has2'       | 0     | 0     | 0    | 0    | 0    | 0     | 0.39 | 0     | 0     | 0     |
| 15118 | 'Has3'       | 0     | 0     | 0.43 | 0.06 | 0    | 0.34  | 0    | 1.03  | 0     | 0     |
| 15122 | 'Hba-a1'     | 6.17  | 0     | 19.9 | 79.1 | 7.89 | 12.27 | 7.05 | 35.78 | 16.83 | 8.37  |
| 15129 | 'Hbb-b1'     | 0     | 0     | 0    | 0.23 | 0    | 0     | 0    | 0     | 0     | 0.09  |
| 15132 | 'Hbb-bh1'    | 0     | 0.09  | 0    | 0    | 0    | 0     | 0    | 0     | 0     | 0     |
| 15139 | 'Hc'         | 0     | 0     | 0    | 0    | 0    | 0     | 0    | 0.34  | 0     | 0.53  |
| 15159 | 'Hccs'       | 3.01  | 13.66 | 13.5 | 6.92 | 7.45 | 6.37  | 14   | 5.14  | 9.37  | 7.23  |
| 15160 | 'Serpind1'   | 0     | 2.09  | 0    | 0    | 0.85 | 0     | 0    | 0.02  | 0     | 0     |
| 15161 | 'Hcfc1'      | 12.88 | 18.48 | 21.8 | 21.6 | 15.2 | 15.13 | 24.3 | 16.71 | 13.83 | 23.75 |
| 15162 | 'Hck'        | 3.07  | 0     | 1.95 | 0    | 0    | 4.67  | 5.22 | 2.61  | 0     | 0     |
| 15163 | 'Hcls1'      | 0     | 0     | 0    | 0    | 0    | 0.72  | 0    | 0     | 0.26  | 0     |
| 15165 | 'Hcn1'       | 0.96  | 2.59  | 0.78 | 1.07 | 0.91 | 0.43  | 0    | 0.65  | 1.36  | 0.38  |
| 15166 | 'Hcn2'       | 0.01  | 0     | 0.06 | 0.32 | 0.5  | 0     | 0.76 | 0     | 0.32  | 0.3   |
| 15168 | 'Hcn3'       | 7.03  | 6.9   | 5.41 | 3.09 | 2.27 | 0.79  | 2.4  | 3.79  | 3.14  | 0.94  |
| 15170 | 'Ptpn6'      | 1.94  | 0     | 0    | 5.28 | 0    | 10.82 | 0    | 0.09  | 0     | 0.11  |
| 15171 | 'Hcrt'       | 0.25  | 1.61  | 0    | 0.96 | 0    | 0.95  | 0.09 | 0     | 0     | 0     |
| 15182 | 'Hdac2'      | 16.14 | 9.2   | 11.3 | 22.6 | 11.7 | 18.37 | 15.1 | 21.11 | 20.23 | 5.86  |
| 15183 | 'Hdac3'      | 85.27 | 106.1 | 104  | 85.8 | 103  | 56.63 | 77.7 | 131   | 104.4 | 87.82 |
| 15184 | 'Hdac5'      | 3.07  | 3.55  | 12.7 | 6.54 | 4.74 | 9.79  | 0.8  | 6.99  | 2.69  | 7.23  |
| 15185 | 'Hdac6'      | 10.2  | 11.85 | 17.9 | 0.93 | 16.1 | 6.34  | 27.9 | 16.25 | 24.98 | 19.63 |
| 15186 | 'Hdc'        | 0     | 0     | 0.73 | 0    | 2.31 | 0     | 0    | 0     | 0     | 0.1   |
| 15191 | 'Hdgf'       | 48.73 | 64.39 | 42.7 | 44.4 | 59.4 | 59.01 | 85.1 | 47.02 | 59.4  | 57.49 |
| 15193 | 'Hdglf2'     | 24.82 | 55.81 | 50   | 36.4 | 38.6 | 37.96 | 44.9 | 27.19 | 35.96 | 37.28 |
| 15194 | 'Htt'        | 1.56  | 1.8   | 0.92 | 0.52 | 1.12 | 3.44  | 2.35 | 1.47  | 3.23  | 0.88  |
| 15199 | 'Hebp1'      | 26.53 | 35.73 | 31.6 | 27.9 | 18.2 | 40.33 | 27.9 | 58.87 | 54.58 | 18.26 |
| 15200 | 'Hbegf'      | 6.58  | 11.39 | 4.06 | 22.2 | 1.69 | 0.04  | 1.93 | 9.13  | 8.92  | 3.7   |
| 15201 | 'Hells'      | 0.18  | 0.79  | 0.31 | 9.23 | 0.3  | 0.31  | 1.74 | 0.37  | 0.51  | 0.11  |
| 15202 | 'Gml2'       | 0     | 0     | 0.04 | 0    | 0    | 0     | 0    | 0     | 0     | 0     |
| 15204 | 'Herc2'      | 4.41  | 3.66  | 7.56 | 3.77 | 4.63 | 1.33  | 2.15 | 3.07  | 6.35  | 2.26  |
| 15205 | 'Hes1'       | 2.63  | 1.51  | 0.61 | 40.5 | 0    | 0.13  | 0.13 | 0     | 0.06  | 1.27  |
| 15207 | 'Hes3'       | 0     | 0     | 0    | 0    | 0    | 0     | 5.21 | 0     | 5.17  | 0.89  |
| 15208 | 'Hes5'       | 21.93 | 7.28  | 6.46 | 4.81 | 3.67 | 5.23  | 8.64 | 8.62  | 27.98 | 0.03  |
| 15211 | 'Hexa'       | 78    | 83.52 | 52.6 | 76.4 | 26.7 | 106.3 | 113  | 70.36 | 106.1 | 73.12 |
| 15212 | 'Hexb'       | 20.42 | 47.15 | 21.8 | 4.29 | 47   | 321.1 | 55.9 | 34.37 | 27.33 | 28.54 |
| 15213 | 'Hey1'       | 13.44 | 10.03 | 3.35 | 10.9 | 8.36 | 9.13  | 7.44 | 7.57  | 4.78  | 3.01  |
| 15214 | 'Hey2'       | 0     | 0     | 0    | 0    | 0    | 0     | 0    | 0     | 4.16  | 0     |
| 15216 | 'Hfe'        | 1.17  | 1.94  | 2    | 13.8 | 4.83 | 1.18  | 1.38 | 3.3   | 1.89  | 1.3   |
| 15220 | 'Foxq1'      | 0     | 0     | 0.02 | 0    | 0    | 0     | 0    | 0     | 0     | 0     |
| 15223 | 'Foxj1'      | 0.53  | 0.87  | 0.35 | 4.06 | 1.99 | 1.62  | 0.04 | 1.98  | 0     | 1.22  |
| 15227 | 'Foxf1'      | 0     | 0     | 0.02 | 0    | 0    | 0     | 0    | 0     | 0     | 0     |
| 15228 | 'Foxg1'      | 7.55  | 6.96  | 7.69 | 25.6 | 1.92 | 0     | 0    | 3.27  | 4.03  | 2.88  |
| 15233 | 'Hgd'        | 0.26  | 0     | 0    | 0    | 0    | 2.37  | 0    | 0     | 2.05  | 0     |
| 15234 | 'Hgf'        | 0     | 0     | 0    | 0    | 0    | 0.94  | 0    | 0     | 0     | 0.29  |
| 15239 | 'Hgs'        | 47.49 | 55.9  | 68.6 | 42.6 | 71.8 | 42.93 | 62.5 | 37.74 | 73.5  | 94.96 |
| 15245 | 'Hhip'       | 1.03  | 0.01  | 0    | 0    | 0    | 0     | 0    | 0.31  | 0.01  | 0     |
| 15247 | 'Mfsd14a'    | 35.67 | 46.46 | 21.6 | 11.7 | 34.6 | 32.11 | 21.7 | 38.64 | 44.25 | 26.88 |
| 15248 | 'Hic1'       | 0     | 0     | 0    | 0.77 | 0    | 0     | 0    | 0.14  | 0     | 0     |
| 15251 | 'Hif1a'      | 11.06 | 19.81 | 19.5 | 19.4 | 12.4 | 3.77  | 13.7 | 18.25 | 6.29  | 13.14 |
| 15254 | 'Hint1'      | 582.3 | 594   | 645  | 667  | 472  | 597.1 | 622  | 471.9 | 574.5 | 525.7 |
| 15257 | 'Hipk1'      | 3.17  | 2.66  | 4.88 | 22   | 0.3  | 2.7   | 6.51 | 0.89  | 1.95  | 4.11  |
| 15258 | 'Hipk2'      | 12.5  | 6.13  | 4.05 | 4.68 | 9.87 | 1.7   | 4.93 | 4.34  | 4.73  | 6.65  |
| 15259 | 'Hipk3'      | 1.48  | 2.82  | 2.19 | 6.53 | 3.89 | 1.07  | 1.66 | 1.8   | 0.13  | 1.31  |
| 15260 | 'Hira'       | 4.95  | 0.42  | 5.73 | 2.51 | 0.06 | 2.49  | 0.1  | 1.79  | 1.5   | 1.84  |
| 15267 | 'Hist2h2aa1' | 36.69 | 33.84 | 26   | 52   | 73.4 | 67.92 | 38.8 | 26.11 | 11.04 | 31.62 |
| 15270 | 'H2afx'      | 76.31 | 66.91 | 49.4 | 44.8 | 37.5 | 45.21 | 68.7 | 69.75 | 53.16 | 69.03 |
| 15273 | 'Hivep2'     | 2.39  | 1.58  | 1.51 | 1.56 | 4.26 | 0.71  | 4.78 | 1.73  | 3.69  | 2.42  |
| 15275 | 'Hk1'        | 33.74 | 40.47 | 62.6 | 24.1 | 37.2 | 25.52 | 47.3 | 47.68 | 30.59 | 29.59 |

|       |            |       |       |      |      |      |       |      |       |       |         |
|-------|------------|-------|-------|------|------|------|-------|------|-------|-------|---------|
| 15277 | 'Hk2'      | 0.05  | 9.13  | 0.61 | 3.23 | 0.95 | 2.66  | 0.02 | 1.24  | 0.03  | 1.41    |
| 15278 | 'Tfb2m'    | 16.55 | 12.7  | 8.44 | 21.3 | 18   | 7.53  | 13.4 | 17.42 | 11.49 | 16.23   |
| 15288 | 'Hmbs'     | 41.95 | 24.41 | 10.7 | 30   | 40.6 | 29.42 | 13.6 | 26.62 | 36.74 | 22.59   |
| 15289 | 'Hmgb1'    | 106.3 | 124   | 131  | 213  | 143  | 140.8 | 127  | 149.7 | 133.7 | 135.73  |
| 15312 | 'Hmgn1'    | 148.5 | 120.3 | 74.7 | 118  | 104  | 81.42 | 85.4 | 91.42 | 96.13 | 98.67   |
| 15331 | 'Hmgn2'    | 239   | 343.9 | 236  | 588  | 318  | 284.2 | 168  | 251.3 | 289   | 298.51  |
| 15353 | 'Hmg20b'   | 2.08  | 1.28  | 3.38 | 3.84 | 4.22 | 3.63  | 1.73 | 1.94  | 2.66  | 2.58    |
| 15354 | 'Hmgb3'    | 39.54 | 56.77 | 90.9 | 110  | 26.7 | 31.24 | 50.1 | 81.63 | 14.91 | 30.43   |
| 15356 | 'Hmgcl'    | 39.99 | 45.81 | 33.6 | 26.1 | 48.5 | 54.02 | 87.9 | 47.37 | 62.52 | 43.53   |
| 15357 | 'Hmgcr'    | 18.19 | 17.35 | 19.8 | 16.7 | 12.9 | 7.43  | 16.5 | 24.97 | 25.71 | 32.33   |
| 15360 | 'Hmgcs2'   | 4.74  | 1.69  | 0    | 0    | 0    | 0     | 2.51 | 0     | 2.99  | 1.8     |
| 15361 | 'Hmga1'    | 64.81 | 19.48 | 59.6 | 42   | 38.3 | 47.51 | 19.7 | 49.32 | 66.38 | 65.44   |
| 15364 | 'Hmga2'    | 0.03  | 0.27  | 0.09 | 0.13 | 0.15 | 0.06  | 0.22 | 0.09  | 0.09  | 0.11    |
| 15366 | 'Hmmr'     | 0.36  | 0.32  | 0.45 | 0.56 | 0.7  | 0.33  | 0.55 | 0.35  | 0.33  | 0.3     |
| 15368 | 'Hmox1'    | 6.53  | 0.34  | 3.95 | 18.6 | 0    | 0     | 0    | 0     | 1.87  | 3.75    |
| 15369 | 'Hmox2'    | 135.3 | 111.7 | 126  | 130  | 149  | 144.2 | 146  | 81.63 | 139.8 | 109.54  |
| 15370 | 'Nr4a1'    | 5.11  | 51.75 | 38.4 | 114  | 2.35 | 9.67  | 19.4 | 7.86  | 10.11 | 25.35   |
| 15371 | 'Hmx1'     | 0     | 0     | 0    | 0.03 | 0    | 0     | 0    | 0     | 0     | 0       |
| 15372 | 'Hmx2'     | 4.48  | 1.73  | 7.26 | 0.21 | 0    | 5.44  | 0    | 5.93  | 1.61  | 1.13    |
| 15373 | 'Hmx3'     | 0.03  | 0.09  | 10.8 | 0.12 | 0    | 0     | 0    | 1.46  | 0     | 0.19    |
| 15374 | 'Jpt1'     | 161   | 162.7 | 151  | 144  | 148  | 162.7 | 125  | 188.6 | 161.1 | 185.81  |
| 15379 | 'Onecut1'  | 0     | 0     | 0    | 0    | 0.79 | 4.88  | 0    | 0     | 0.02  | 2.96    |
| 15381 | 'Hnrnpc'   | 175.5 | 173.7 | 114  | 129  | 89.4 | 170.3 | 138  | 126.1 | 109.5 | 146.9   |
| 15382 | 'Hnrnpa1'  | 108.4 | 178.8 | 143  | 159  | 88.4 | 129   | 104  | 138.9 | 136.3 | 121.14  |
| 15384 | 'Hnrnpab'  | 8.36  | 7.18  | 5.27 | 16.5 | 7.67 | 6.94  | 15.8 | 12.84 | 13.58 | 7.39    |
| 15387 | 'Hnrnpk'   | 361.5 | 392.8 | 407  | 457  | 371  | 377.2 | 333  | 439   | 352.8 | 361.59  |
| 15388 | 'Hnrnpl'   | 6.9   | 8.46  | 7.34 | 12.4 | 10.3 | 6.2   | 4.59 | 5.37  | 16.54 | 9.39    |
| 15400 | 'Hoxa3'    | 0     | 0     | 0    | 0    | 0    | 0.02  | 0    | 0     | 0     | 0       |
| 15425 | 'Hoxc6'    | 0     | 0     | 0    | 0.01 | 0    | 0     | 0    | 0     | 0     | 0       |
| 15431 | 'Hoxd11'   | 0     | 0     | 0    | 0    | 0    | 0     | 0    | 0.01  | 0     | 0       |
| 15436 | 'Hoxd4'    | 0     | 0     | 0    | 0    | 0    | 0     | 0    | 0     | 0.33  | 0       |
| 15441 | 'Hp1bp3'   | 60.99 | 69.41 | 54.2 | 61.5 | 71.4 | 58.37 | 78.9 | 51.03 | 55.83 | 66.99   |
| 15442 | 'Hpse'     | 0     | 0     | 0    | 0    | 0    | 0     | 0    | 0.3   | 0     | 0       |
| 15444 | 'Hpca'     | 22.93 | 14.12 | 62.7 | 20   | 27.2 | 18.7  | 20   | 82.41 | 14.23 | 1.95    |
| 15446 | 'Hpgd'     | 1.16  | 8.61  | 1.78 | 0    | 1.82 | 6.48  | 0    | 1.08  | 1.71  | 0       |
| 15450 | 'Lipc'     | 0     | 0     | 0    | 0    | 3    | 0     | 0    | 0     | 0     | 0       |
| 15452 | 'Hprt'     | 414.8 | 498.6 | 348  | 432  | 408  | 550.1 | 313  | 474.4 | 392.6 | 413.83  |
| 15458 | 'Hpx'      | 0.21  | 0     | 0    | 0    | 0    | 0     | 0    | 0     | 0     | 0       |
| 15460 | 'Hr'       | 1.19  | 0.01  | 0.5  | 0    | 0    | 0.03  | 0    | 2.13  | 0     | 0       |
| 15461 | 'Hras'     | 36.04 | 11.88 | 32.8 | 42.9 | 35.4 | 70.54 | 43   | 20.31 | 18.62 | 17.11   |
| 15463 | 'Agfg1'    | 1.79  | 1.79  | 0    | 0.08 | 1.08 | 0.08  | 2.55 | 0.08  | 2.87  | 2.46    |
| 15464 | 'Hrc'      | 0.02  | 0     | 0.12 | 0.05 | 0.02 | 0.02  | 0.04 | 0     | 0.02  | 0       |
| 15465 | 'Hrh1'     | 10.67 | 20.02 | 11.8 | 10.4 | 8.39 | 6.6   | 23.6 | 16.22 | 18.84 | 10.71   |
| 15466 | 'Hrh2'     | 0     | 0     | 0    | 3.04 | 0.35 | 0     | 0    | 2.17  | 1.56  | 2.79    |
| 15467 | 'Eif2ak1'  | 6.86  | 23.25 | 28.9 | 9.79 | 21.6 | 8.88  | 19.4 | 26.39 | 21.8  | 9.68    |
| 15468 | 'Prmt2'    | 339   | 386.1 | 351  | 365  | 421  | 525.5 | 307  | 404.8 | 520.8 | 549.6   |
| 15469 | 'Prmt1'    | 28.05 | 24.69 | 29.8 | 33.8 | 19.7 | 16.79 | 30.3 | 28.53 | 60.15 | 35.91   |
| 15473 | 'Rida'     | 58.15 | 41.71 | 48.9 | 69.8 | 49.9 | 37.91 | 58.7 | 41.64 | 60.57 | 48.75   |
| 15476 | 'Hs3st1'   | 5.14  | 13.48 | 5.26 | 0    | 26.1 | 47.48 | 2.75 | 37.16 | 5.01  | 13.14   |
| 15478 | 'Hs3st3a1' | 0.01  | 0     | 0    | 0    | 0    | 0     | 0    | 0.04  | 0     | 0       |
| 15481 | 'Hspa8'    | 2342  | 2151  | 1859 | 1956 | 1452 | 1653  | 1935 | 2135  | 2266  | 2498.84 |
| 15482 | 'Hspa1l'   | 1.49  | 1.75  | 3.24 | 0    | 0    | 0     | 4.54 | 0     | 2.3   | 0       |
| 15483 | 'Hsd11b1'  | 10.67 | 5.47  | 0    | 0    | 0.04 | 0     | 0    | 1.61  | 0     | 0       |
| 15485 | 'Hsd17b1'  | 0     | 0     | 0    | 0    | 0    | 0     | 0    | 0     | 1.63  | 0       |
| 15486 | 'Hsd17b2'  | 0     | 0     | 0    | 0    | 0    | 0     | 0    | 4.32  | 0     | 0       |
| 15488 | 'Hsd17b4'  | 24.48 | 22.36 | 13.3 | 9.46 | 11.5 | 12.83 | 20.1 | 20.91 | 31.58 | 11.29   |
| 15490 | 'Hsd17b7'  | 1.66  | 0.76  | 2.18 | 3.22 | 2.57 | 0     | 8.29 | 4.17  | 0.63  | 1.47    |
| 15494 | 'Hsd3b3'   | 0     | 0.23  | 0.03 | 0.03 | 0.05 | 0     | 0.21 | 1.21  | 0.01  | 0.03    |

|       |            |       |       |      |      |      |       |      |       |       |         |
|-------|------------|-------|-------|------|------|------|-------|------|-------|-------|---------|
| 15496 | 'Hsd3b5'   | 0     | 0     | 0    | 0    | 0    | 0.2   | 0    | 0     | 0     | 0       |
| 15499 | 'Hsf1'     | 40.68 | 34.99 | 28.5 | 58.5 | 41.1 | 56.24 | 44.8 | 31.39 | 50.29 | 37.19   |
| 15500 | 'Hsf2'     | 22.45 | 33.84 | 18.5 | 39.4 | 30.2 | 11.92 | 8.45 | 24.64 | 18.89 | 23.8    |
| 15502 | 'Dnaja1'   | 194.4 | 221.2 | 156  | 114  | 147  | 150.4 | 144  | 185.5 | 181.5 | 174.81  |
| 15504 | 'Dnab3'    | 5.76  | 4.4   | 3.48 | 14.1 | 9.41 | 10.37 | 7.99 | 7.69  | 6.93  | 2.7     |
| 15505 | 'Hsph1'    | 181.7 | 172.5 | 70.5 | 114  | 87.6 | 62.11 | 177  | 133.2 | 117   | 170.43  |
| 15507 | 'Hspb1'    | 18.52 | 0     | 5.5  | 12.8 | 0.17 | 37.5  | 0.46 | 0.14  | 17.15 | 33.99   |
| 15510 | 'Hspd1'    | 212.4 | 172.9 | 130  | 190  | 144  | 209.5 | 134  | 165.4 | 170.8 | 197.9   |
| 15511 | 'Hspa1b'   | 0     | 0     | 0.04 | 0    | 0    | 0     | 0    | 0.25  | 0.02  | 0.63    |
| 15512 | 'Hspa2'    | 0.6   | 8.05  | 2.2  | 33.7 | 9.7  | 15.94 | 4.53 | 3.54  | 2.57  | 10.23   |
| 15516 | 'Hsp90ab1' | 1054  | 1033  | 742  | 733  | 942  | 1090  | 917  | 890   | 996   | 1153.26 |
| 15519 | 'Hsp90aa1' | 866.3 | 825.4 | 710  | 855  | 498  | 719.5 | 568  | 530.7 | 482   | 674.8   |
| 15525 | 'Hspa4'    | 14.51 | 18.81 | 14.2 | 17.6 | 11.5 | 19.97 | 16   | 19.32 | 21.71 | 8.02    |
| 15526 | 'Hspa9'    | 72.89 | 80.54 | 102  | 84.1 | 65.1 | 95.98 | 102  | 107.6 | 94.96 | 103     |
| 15528 | 'Hspe1'    | 300.7 | 238.7 | 299  | 329  | 185  | 329.9 | 250  | 238.8 | 308.5 | 299.68  |
| 15529 | 'Sdc2'     | 32.34 | 65.33 | 46.7 | 52.5 | 24.2 | 22.32 | 47   | 35.49 | 25.55 | 44.7    |
| 15530 | 'Hspg2'    | 0     | 0.06  | 0.75 | 0    | 0    | 0     | 1.18 | 0     | 0     | 0.01    |
| 15531 | 'Ndst1'    | 4.08  | 1.33  | 4.74 | 8.72 | 1.88 | 0.86  | 4.68 | 1.96  | 3.21  | 4.9     |
| 15547 | 'Trmt2a'   | 51.16 | 34.17 | 41.4 | 47.2 | 40.6 | 58.64 | 26   | 62.46 | 32.2  | 36.54   |
| 15550 | 'Htr1a'    | 3.4   | 41.4  | 10.7 | 0    | 72.9 | 2.2   | 57.2 | 27.4  | 32.1  | 14.1    |
| 15551 | 'Htr1b'    | 40.6  | 1.3   | 51.9 | 0    | 79.2 | 44.2  | 41.1 | 40.1  | 87.5  | 34.4    |
| 15552 | 'Htr1d'    | 0     | 0     | 0.2  | 0    | 29   | 0     | 0    | 0     | 0     | 18.4    |
| 15557 | 'Htr1f'    | 54.4  | 33.2  | 0    | 74   | 0    | 0     | 0    | 0     | 0     | 0       |
| 15558 | 'Htr2a'    | 39.8  | 0.3   | 42.3 | 0    | 9.7  | 0     | 0    | 0     | 16.6  | 38      |
| 15559 | 'Htr2b'    | 0     | 4.9   | 0    | 0    | 0    | 0     | 0    | 0     | 0     | 0       |
| 15560 | 'Htr2c'    | 53.8  | 39.4  | 94.8 | 0    | 164  | 16.7  | 77.1 | 25.5  | 46.7  | 34.5    |
| 15561 | 'Htr3a'    | 0     | 0     | 98.3 | 0    | 88.5 | 0     | 3.4  | 0     | 0     | 0       |
| 15562 | 'Htr4'     | 0.1   | 9.8   | 54   | 0    | 4.9  | 0     | 3.5  | 9.3   | 0     | 0       |
| 15563 | 'Htr5a'    | 0     | 1.4   | 27   | 0    | 12   | 0.3   | 24.1 | 8.6   | 2.2   | 0.1     |
| 15564 | 'Htr5b'    | 18.4  | 0     | 0    | 0    | 116  | 109   | 45.4 | 0.2   | 0     | 24.5    |
| 15565 | 'Htr6'     | 0     | 0     | 0    | 0    | 12.1 | 0     | 7    | 0     | 39.8  | 0       |
| 15566 | 'Htr7'     | 151.1 | 132.9 | 112  | 0    | 145  | 98.7  | 1.9  | 106.4 | 34    | 75.8    |
| 15567 | 'Slc6a4'   | 0     | 1.94  | 0    | 0.04 | 0    | 0     | 0    | 0.09  | 0     | 0       |
| 15568 | 'Elavl1'   | 4.22  | 2.74  | 10.4 | 3.36 | 3.33 | 1.91  | 2.03 | 2.41  | 2.22  | 2.8     |
| 15569 | 'Elavl2'   | 31.91 | 21.59 | 41.8 | 12.5 | 20.8 | 12.64 | 40.6 | 15.93 | 45.28 | 25.9    |
| 15571 | 'Elavl3'   | 29.3  | 12.55 | 14.1 | 18.7 | 38   | 15.82 | 14.3 | 13.46 | 20.05 | 18.81   |
| 15572 | 'Elavl4'   | 61.74 | 51.92 | 29.7 | 73.8 | 42.4 | 67.34 | 41.3 | 58.47 | 54.66 | 42.35   |
| 15574 | 'Hus1'     | 4.19  | 1.14  | 0.02 | 4.39 | 0.1  | 6.57  | 4.56 | 0     | 0.95  | 0       |
| 15586 | 'Hyal1'    | 6.5   | 0     | 0    | 0    | 0    | 0     | 0    | 0     | 2.15  | 0.02    |
| 15587 | 'Hyal2'    | 17.57 | 17.84 | 3.92 | 0    | 13   | 17.02 | 29   | 23.83 | 20.41 | 19.29   |
| 15874 | 'lapp'     | 0     | 0     | 0    | 0    | 0    | 0     | 0    | 2.59  | 0     | 0       |
| 15893 | 'lca1'     | 59.91 | 50.96 | 55.5 | 62   | 61.2 | 39.53 | 60.7 | 60.62 | 62.25 | 64.21   |
| 15894 | 'lcam1'    | 0     | 0     | 0    | 0    | 0    | 6.16  | 0    | 0     | 0     | 0       |
| 15896 | 'lcam2'    | 0     | 0     | 0.04 | 0    | 0    | 0     | 0    | 0     | 0     | 0       |
| 15898 | 'lcam5'    | 6.74  | 10.41 | 4.68 | 16.5 | 8.33 | 0.17  | 7    | 7.44  | 3.29  | 4.68    |
| 15900 | 'lrf8'     | 0.08  | 0     | 0    | 5.14 | 0    | 22.15 | 0    | 0     | 0     | 0.01    |
| 15901 | 'ld1'      | 5.57  | 5.57  | 4.07 | 40.3 | 3.56 | 0.05  | 0    | 0.76  | 0     | 0       |
| 15902 | 'ld2'      | 56.95 | 119.4 | 72.8 | 189  | 27.3 | 191   | 48.5 | 37.56 | 29.13 | 51.62   |
| 15903 | 'ld3'      | 8.78  | 36.07 | 2.78 | 68.3 | 22   | 30.14 | 0    | 6.58  | 12.41 | 0.05    |
| 15904 | 'ld4'      | 7.93  | 2.8   | 10.9 | 21.7 | 7.51 | 17.8  | 11   | 7.92  | 5.87  | 5.54    |
| 15925 | 'lde'      | 6.86  | 8.5   | 11.6 | 5.56 | 3.08 | 6.37  | 19.7 | 5.36  | 5.22  | 11.75   |
| 15926 | 'ldh1'     | 51.48 | 40.7  | 46   | 51.5 | 49.8 | 20.8  | 23.3 | 47.99 | 26.73 | 47.84   |
| 15929 | 'ldh3g'    | 296.7 | 264   | 285  | 321  | 306  | 506.2 | 315  | 268.2 | 303.1 | 293.4   |
| 15930 | 'ldo1'     | 1.63  | 4.26  | 3.1  | 0    | 0    | 17.36 | 3    | 2.73  | 8.25  | 5.03    |
| 15931 | 'lds'      | 1.87  | 3.89  | 2.76 | 5.05 | 5.61 | 7.26  | 12.3 | 5.43  | 4.7   | 3.07    |
| 15932 | 'ldua'     | 8.93  | 11.59 | 19   | 19.4 | 17   | 13.15 | 20.8 | 13.04 | 15.85 | 10.8    |
| 15936 | 'ler2'     | 1.64  | 40.98 | 42.3 | 120  | 0.79 | 14.6  | 32.7 | 4.21  | 0     | 5.28    |
| 15937 | 'ler3'     | 3.13  | 26.46 | 29.8 | 28.8 | 17.5 | 20.11 | 19.1 | 11.96 | 7.81  | 6.46    |

|       |           |       |       |      |      |      |       |      |       |       |       |
|-------|-----------|-------|-------|------|------|------|-------|------|-------|-------|-------|
| 15939 | 'ler5'    | 0.78  | 0.81  | 0.12 | 0.89 | 1.31 | 4.26  | 8.08 | 0.94  | 0.01  | 0.41  |
| 15944 | 'lrgm1'   | 11.46 | 7.54  | 13.5 | 24.2 | 0.04 | 13.47 | 27.1 | 6.02  | 13.77 | 0.91  |
| 15945 | 'Cxcl10'  | 0     | 0     | 0.04 | 13.3 | 5.7  | 0     | 0    | 0     | 0     | 0     |
| 15950 | 'lfi203'  | 0.01  | 0     | 0.01 | 0    | 0    | 0.03  | 0.01 | 0     | 0     | 0.64  |
| 15951 | 'lfi204'  | 0     | 0     | 0    | 0    | 0    | 0     | 0    | 0     | 0     | 0.07  |
| 15953 | 'lfi47'   | 0     | 0     | 0    | 13   | 0.6  | 0     | 0    | 0     | 0     | 0     |
| 15957 | 'lfit1'   | 2.82  | 0     | 17.3 | 29.9 | 0    | 0     | 0    | 0     | 7.1   | 4.59  |
| 15958 | 'lfit2'   | 0.72  | 1.71  | 1.52 | 2.71 | 1.4  | 0.24  | 7.95 | 0     | 2.47  | 2.91  |
| 15959 | 'lfit3'   | 8.3   | 2.97  | 35   | 134  | 6.27 | 11.05 | 10.1 | 2.18  | 2.32  | 4.25  |
| 15975 | 'lfnar1'  | 3.47  | 11.01 | 8.38 | 14   | 7.62 | 6.2   | 7.58 | 9.25  | 17.8  | 11.63 |
| 15976 | 'lfnar2'  | 20.64 | 32.29 | 9.77 | 17.5 | 12.4 | 22.71 | 20.1 | 12.35 | 24.26 | 31.61 |
| 15979 | 'lfngr1'  | 10.37 | 9.11  | 9.35 | 13.7 | 6.1  | 10.07 | 16.6 | 10.71 | 7.19  | 11.79 |
| 15980 | 'lfngr2'  | 17.84 | 26.93 | 20.9 | 26.2 | 14.4 | 8.54  | 4.19 | 27.31 | 20.12 | 16.52 |
| 15982 | 'lfrd1'   | 11.41 | 23.61 | 9.71 | 32   | 13.2 | 0.88  | 6.79 | 4.19  | 4.56  | 0.5   |
| 15983 | 'lfrd2'   | 3.66  | 1.77  | 1.44 | 5.08 | 4.51 | 3.16  | 6.03 | 3.33  | 6.49  | 6.06  |
| 16000 | 'lgf1'    | 0.43  | 0     | 0.44 | 0    | 0    | 1.82  | 0    | 0.71  | 0     | 0.25  |
| 16001 | 'lgf1r'   | 0.06  | 2.34  | 1.01 | 0.91 | 3.07 | 0.95  | 0.69 | 0.26  | 1.31  | 2.48  |
| 16002 | 'lgf2'    | 0.01  | 0     | 0    | 0    | 0    | 0     | 0    | 0     | 0     | 0     |
| 16004 | 'lgf2r'   | 1.6   | 1.63  | 3.38 | 4.16 | 2.23 | 1.4   | 0.17 | 0.63  | 0.45  | 2.3   |
| 16006 | 'lgfbp1'  | 0     | 0     | 0    | 1.44 | 0    | 0     | 0    | 0     | 0     | 0     |
| 16007 | 'Cyr61'   | 2.54  | 38.51 | 6.17 | 86.6 | 3.43 | 9.64  | 13   | 2.97  | 0.08  | 0.06  |
| 16008 | 'lgfbp2'  | 0     | 0     | 3.34 | 0    | 0.05 | 0     | 0    | 0     | 2.88  | 0     |
| 16009 | 'lgfbp3'  | 3.47  | 2.37  | 4.84 | 0    | 3.21 | 3.92  | 5.55 | 3     | 0.05  | 4.47  |
| 16010 | 'lgfbp4'  | 0.02  | 1.56  | 7.88 | 0    | 2.9  | 0     | 0    | 2.17  | 0     | 0     |
| 16011 | 'lgfbp5'  | 2.34  | 0.56  | 12.6 | 11.5 | 7.73 | 6.35  | 0.8  | 2.59  | 5.23  | 1.66  |
| 16012 | 'lgfbp6'  | 0     | 3.19  | 0    | 0    | 0    | 0.11  | 0    | 0     | 1.26  | 0     |
| 16068 | 'lI18bp'  | 2.65  | 1.39  | 7.7  | 0    | 4.75 | 0     | 6.57 | 2.33  | 17.6  | 12.22 |
| 16069 | 'Jchain'  | 0.98  | 0.02  | 0.02 | 0.03 | 0    | 0     | 0    | 0     | 0     | 0.02  |
| 16145 | 'lgtp'    | 2.59  | 0     | 0.15 | 31.3 | 4.14 | 0     | 0.02 | 0     | 0     | 0     |
| 16149 | 'Cd74'    | 0.07  | 0     | 0.04 | 0    | 0    | 1.95  | 0    | 0.69  | 0     | 3.19  |
| 16150 | 'lkbkb'   | 15.21 | 7.07  | 5.45 | 3.83 | 7.16 | 8.03  | 16.4 | 8.24  | 7.24  | 16.46 |
| 16151 | 'lkbkg'   | 4.09  | 8.03  | 6.65 | 0.31 | 4.26 | 2.8   | 9.02 | 7.1   | 6.43  | 8.89  |
| 16154 | 'lI10ra'  | 0     | 2.15  | 0    | 3.69 | 0.9  | 8.06  | 0    | 0     | 0     | 0     |
| 16155 | 'lI10rb'  | 8.68  | 0     | 0.03 | 16.7 | 1.95 | 1.36  | 4.27 | 2.39  | 3.89  | 0.05  |
| 16156 | 'lI11'    | 0     | 1.88  | 0.04 | 1.35 | 0.04 | 0     | 0.04 | 0     | 0     | 0     |
| 16157 | 'lI11ra1' | 8.91  | 23.14 | 17.1 | 30.7 | 34.3 | 51.79 | 11.2 | 0.72  | 22.31 | 53.9  |
| 16158 | 'lI11ra2' | 0     | 0.14  | 0.05 | 0.34 | 0.26 | 0     | 0    | 0.64  | 0.09  | 0     |
| 16159 | 'lI12a'   | 0     | 2.82  | 0    | 0    | 4.97 | 0     | 0    | 0     | 0     | 0     |
| 16162 | 'lI12rb2' | 0.7   | 0     | 1.15 | 5.78 | 0    | 0     | 0    | 0     | 0.5   | 0.34  |
| 16164 | 'lI13ra1' | 7.69  | 13.78 | 4.06 | 12.6 | 5.22 | 3.53  | 7.72 | 5.06  | 6.42  | 7.55  |
| 16168 | 'lI15'    | 0     | 0     | 0    | 0    | 0    | 0     | 0.57 | 0     | 0     | 0     |
| 16169 | 'lI15ra'  | 4.36  | 6.05  | 2.86 | 4.57 | 0.13 | 1.6   | 3.82 | 3.88  | 2.25  | 9.47  |
| 16170 | 'lI16'    | 0     | 0.35  | 0    | 0    | 0    | 7.73  | 0    | 0.97  | 0     | 0     |
| 16172 | 'lI17ra'  | 0     | 0     | 0    | 0    | 0    | 1.51  | 0.01 | 0     | 5.92  | 4.38  |
| 16173 | 'lI18'    | 8.62  | 25.58 | 23.9 | 5.33 | 18.9 | 26.16 | 35.9 | 10.86 | 17.44 | 35.64 |
| 16175 | 'lI1a'    | 7.18  | 0.12  | 0    | 13.9 | 6.87 | 8.94  | 0    | 0     | 0.22  | 0     |
| 16177 | 'lI1r1'   | 0.92  | 0     | 0    | 0    | 0    | 0     | 0    | 0     | 0     | 0     |
| 16178 | 'lI1r2'   | 0     | 3.97  | 4.52 | 0    | 0    | 0     | 0    | 0     | 0     | 0     |
| 16179 | 'lI1rak1' | 14.2  | 7.8   | 8.2  | 11.4 | 8.2  | 9.53  | 10   | 3.35  | 11.07 | 9.6   |
| 16180 | 'lI1rap'  | 8.89  | 5.11  | 6.23 | 15   | 9.47 | 3.42  | 5.91 | 14.16 | 2.65  | 4.66  |
| 16181 | 'lI1rn'   | 0     | 0     | 0.02 | 0    | 0    | 0     | 0    | 0     | 0     | 0     |
| 16184 | 'lI2ra'   | 0.08  | 0.01  | 0.06 | 0.04 | 0.1  | 0.1   | 0.06 | 0.02  | 0.1   | 0.05  |
| 16188 | 'lI3ra'   | 0     | 1.8   | 0    | 5.14 | 2.62 | 0     | 0.15 | 1.72  | 2.59  | 1.04  |
| 16190 | 'lI4ra'   | 0.54  | 3.37  | 2.59 | 0.56 | 0    | 3.98  | 0    | 0     | 0.01  | 4.27  |
| 16192 | 'lI5ra'   | 0.13  | 0.07  | 0.21 | 0.25 | 0.33 | 0.11  | 0.24 | 0.08  | 0.23  | 0.08  |
| 16194 | 'lI6ra'   | 0     | 1.03  | 0    | 0    | 0.14 | 2.33  | 0    | 0     | 0     | 2.14  |
| 16195 | 'lI6st'   | 7.1   | 7.29  | 4.06 | 0    | 3.09 | 4.82  | 5.26 | 1.44  | 7.77  | 2.79  |
| 16196 | 'lI7'     | 0     | 0     | 0    | 0    | 3.73 | 0     | 0.02 | 0     | 0     | 1.64  |



|       |            |       |       |      |      |      |       |      |       |       |        |
|-------|------------|-------|-------|------|------|------|-------|------|-------|-------|--------|
| 16197 | 'Ii7r'     | 0.46  | 0.12  | 0    | 0    | 0    | 0.58  | 0    | 0     | 0.03  | 0      |
| 16199 | 'Ii9r'     | 0     | 0     | 0.03 | 0.01 | 0    | 0.01  | 0.01 | 0.02  | 0.03  | 0.01   |
| 16201 | 'Ilf3'     | 55.02 | 64.61 | 42   | 23.1 | 53.5 | 42.61 | 62.4 | 48.85 | 64.3  | 60.37  |
| 16202 | 'Ilk'      | 24.14 | 25.4  | 38.7 | 34   | 36   | 22.5  | 41.3 | 30.92 | 32.77 | 16.21  |
| 16205 | 'Gimap1'   | 1.41  | 1.51  | 1.72 | 2.35 | 2.64 | 1.2   | 1.99 | 1.68  | 1.1   | 0.89   |
| 16206 | 'Lrig1'    | 1.16  | 3.43  | 0.01 | 3.43 | 2.18 | 2.79  | 1.26 | 4.05  | 2.02  | 1.57   |
| 16210 | 'Impact'   | 398.1 | 451.6 | 490  | 307  | 308  | 202.6 | 411  | 444.3 | 499.9 | 481.41 |
| 16211 | 'Kpnb1'    | 9.94  | 10.78 | 9.57 | 16.4 | 10.2 | 14.71 | 7.63 | 9.3   | 10.59 | 8.09   |
| 16319 | 'Incenp'   | 3.84  | 1.31  | 4.32 | 8.56 | 1.38 | 6.94  | 6.4  | 0.59  | 8.95  | 0      |
| 16322 | 'Inha'     | 2.44  | 12.46 | 8.53 | 16.3 | 17.9 | 6.97  | 9.51 | 5.17  | 3.63  | 11.89  |
| 16323 | 'Inhba'    | 2.89  | 0.84  | 0.53 | 1.24 | 0    | 0     | 0.22 | 0.17  | 0     | 0      |
| 16324 | 'Inhbb'    | 0     | 0     | 0.17 | 0    | 0    | 0     | 0    | 0     | 1.17  | 0      |
| 16325 | 'Inhbc'    | 0     | 0     | 0    | 0    | 0    | 0     | 0    | 0     | 0     | 0.41   |
| 16326 | 'Inhbe'    | 0     | 0.04  | 0    | 0    | 0    | 0.24  | 0    | 0     | 0     | 0      |
| 16328 | 'Cep250'   | 1.37  | 1.69  | 4.81 | 3.06 | 2.59 | 0.33  | 1.35 | 3.53  | 4.72  | 4.37   |
| 16329 | 'Inpp1'    | 26.93 | 25.77 | 26.9 | 9.14 | 22   | 32.89 | 15.6 | 24.97 | 25.33 | 14.89  |
| 16330 | 'Inpp5b'   | 9.38  | 6.99  | 11.6 | 12.3 | 1.69 | 1.99  | 4.5  | 6.82  | 3.93  | 14.6   |
| 16331 | 'Inpp5d'   | 0     | 0     | 2.05 | 0    | 0    | 1.24  | 0    | 0     | 0     | 0      |
| 16332 | 'Inppl1'   | 0.15  | 0     | 0.73 | 0.91 | 0    | 0     | 0    | 1.1   | 0     | 0.49   |
| 16334 | 'Ins2'     | 0     | 0     | 0    | 0    | 0    | 0     | 0    | 1.74  | 0     | 0      |
| 16336 | 'Insl3'    | 0     | 0     | 0    | 0    | 0    | 0     | 2.4  | 0     | 0     | 0      |
| 16337 | 'Insr'     | 1.52  | 9.53  | 3.94 | 2.56 | 0.75 | 3.01  | 8.92 | 1.94  | 1.84  | 1.16   |
| 16341 | 'Eif3e'    | 66.76 | 77.6  | 45.8 | 90.8 | 42.1 | 86.18 | 38.2 | 82.15 | 53.7  | 74.74  |
| 16348 | 'Invs'     | 0.91  | 0.8   | 0.75 | 0.87 | 2.3  | 0.16  | 0    | 0.55  | 1.12  | 5.46   |
| 16351 | 'lpp'      | 2.91  | 3.22  | 6.31 | 10.5 | 1.08 | 19.93 | 10   | 4.64  | 7.89  | 15.29  |
| 16362 | 'lrf1'     | 12.94 | 6.78  | 15.5 | 32.1 | 0    | 4.57  | 4.62 | 3.13  | 8.24  | 5.1    |
| 16363 | 'lrf2'     | 6.46  | 4.3   | 2.61 | 9.78 | 8.65 | 0.98  | 2.37 | 6.68  | 7.91  | 3.11   |
| 16367 | 'lrs1'     | 0.23  | 0.25  | 2.08 | 0.79 | 0.1  | 0.62  | 0    | 0.06  | 0     | 0.88   |
| 16370 | 'lrs4'     | 20.45 | 17.07 | 17.1 | 34.2 | 3.89 | 1.32  | 18.8 | 20.96 | 15.23 | 23.55  |
| 16373 | 'lrx3'     | 0     | 0     | 0.04 | 0    | 0    | 0     | 0    | 0     | 0     | 0      |
| 16391 | 'lrf9'     | 1.16  | 6.62  | 14.5 | 4.24 | 5.13 | 7.09  | 11.1 | 4.02  | 3.19  | 8.82   |
| 16392 | 'lsl1'     | 24.99 | 22.03 | 28.5 | 49.1 | 28.2 | 5.16  | 3.56 | 7.47  | 27.56 | 2.96   |
| 16396 | 'ltch'     | 4.29  | 2.13  | 7.04 | 0.56 | 4.14 | 3.46  | 1.01 | 4.97  | 9.45  | 3.33   |
| 16398 | 'ltga2'    | 0     | 0     | 0.85 | 0    | 0    | 0     | 0    | 0     | 0     | 0      |
| 16399 | 'ltga2b'   | 1.11  | 0.36  | 0.94 | 4.53 | 2.01 | 4.58  | 0.65 | 0.68  | 0.48  | 1.93   |
| 16400 | 'ltga3'    | 3.11  | 11.43 | 9.07 | 14   | 8.54 | 6.33  | 6.45 | 9.35  | 26.69 | 17.42  |
| 16401 | 'ltga4'    | 0.18  | 0.3   | 0.41 | 0.4  | 0.38 | 0.21  | 0.23 | 0.79  | 0.29  | 0.32   |
| 16402 | 'ltga5'    | 0     | 0.16  | 0.01 | 0.01 | 0.07 | 0.14  | 0    | 0     | 0     | 0.01   |
| 16403 | 'ltga6'    | 0.14  | 0.6   | 0.92 | 3.85 | 0.84 | 0.03  | 0    | 0.16  | 0.1   | 0.83   |
| 16404 | 'ltga7'    | 0.02  | 0.01  | 0.04 | 0    | 0.14 | 0.02  | 4    | 0.01  | 0.86  | 1.1    |
| 16409 | 'ltgam'    | 0     | 0     | 1.23 | 0    | 0    | 0.23  | 0    | 0     | 0     | 1.32   |
| 16410 | 'ltgav'    | 0.07  | 0.43  | 3.3  | 1.86 | 0.48 | 0.02  | 1.1  | 0.09  | 0.15  | 0      |
| 16412 | 'ltgb1'    | 12.35 | 2.48  | 7.54 | 10.7 | 14.5 | 3.01  | 6.86 | 6.96  | 7.39  | 10.39  |
| 16413 | 'ltgb1bp1' | 33.64 | 21.72 | 20.6 | 82.3 | 37.1 | 29.83 | 78.4 | 32.23 | 16.9  | 21.76  |
| 16414 | 'ltgb2'    | 0     | 0     | 0    | 0    | 0    | 5.89  | 0    | 0     | 0     | 0.08   |
| 16416 | 'ltgb3'    | 0     | 0     | 1.16 | 0    | 0    | 0     | 0    | 0     | 0     | 0      |
| 16418 | 'Eif6'     | 96.33 | 85.53 | 77.8 | 91.4 | 86.2 | 114.6 | 78.8 | 76.07 | 79.54 | 78     |
| 16419 | 'ltgb5'    | 20.01 | 5.2   | 10.1 | 0    | 30.8 | 58.03 | 80.8 | 101.2 | 50.03 | 40.01  |
| 16420 | 'ltgb6'    | 0     | 0     | 0    | 0    | 0.01 | 0     | 0    | 0     | 0     | 0      |
| 16421 | 'ltgb7'    | 0     | 0     | 0    | 0    | 0    | 0     | 0.49 | 0     | 0     | 0      |
| 16423 | 'Cd47'     | 135.5 | 152.9 | 120  | 72.6 | 114  | 103.4 | 154  | 118.1 | 148.3 | 129.94 |
| 16425 | 'ltih2'    | 0     | 0     | 0.05 | 0    | 0    | 0     | 0    | 0     | 0     | 0      |
| 16426 | 'ltih3'    | 151.8 | 154.1 | 44.4 | 135  | 13   | 148.7 | 41   | 43.26 | 91.23 | 48.84  |
| 16428 | 'ltk'      | 0     | 0     | 1.18 | 5.43 | 0    | 0.04  | 0    | 0     | 0     | 0      |
| 16430 | 'Stt3a'    | 16.22 | 20.38 | 22.1 | 38.5 | 24.7 | 7.93  | 18   | 18.1  | 27.34 | 20.62  |
| 16431 | 'ltm2a'    | 12.24 | 1.07  | 7.52 | 27.8 | 11   | 18.37 | 36.1 | 11.68 | 6.37  | 7.49   |
| 16432 | 'ltm2b'    | 698.3 | 918.6 | 742  | 864  | 884  | 961.6 | 742  | 792.9 | 736.2 | 951.29 |
| 16433 | 'Cuzd1'    | 0     | 0     | 0    | 0    | 0    | 0     | 0    | 0.05  | 0     | 0      |

|       |          |       |       |      |      |      |       |      |       |       |        |
|-------|----------|-------|-------|------|------|------|-------|------|-------|-------|--------|
| 16434 | 'ltpa'   | 92.05 | 60.99 | 90.5 | 76.9 | 72.6 | 73.06 | 89.8 | 71.82 | 61.7  | 101.6  |
| 16438 | 'ltp1'   | 5.5   | 5.55  | 6.05 | 6.88 | 3.3  | 1.84  | 1.9  | 0.26  | 2.39  | 2.11   |
| 16439 | 'ltp2'   | 0.28  | 1.45  | 0.82 | 2.01 | 0    | 0.59  | 1.63 | 0.59  | 1.48  | 0.03   |
| 16440 | 'ltp3'   | 0     | 0     | 0    | 1.33 | 0    | 0     | 0    | 0     | 0     | 0.18   |
| 16443 | 'ltsn1'  | 8.14  | 6.35  | 4.2  | 3.03 | 3.72 | 3.15  | 4.05 | 3.62  | 5.84  | 3.14   |
| 16449 | 'Jag1'   | 0.06  | 0.31  | 2.1  | 1.96 | 0.14 | 0     | 0.48 | 0.08  | 0.24  | 0      |
| 16450 | 'Jag2'   | 3     | 8.12  | 14   | 12.4 | 2.37 | 7.96  | 8.25 | 3.05  | 5.91  | 0.02   |
| 16451 | 'Jak1'   | 27.41 | 25.94 | 31.3 | 27.4 | 17.9 | 12.9  | 55.2 | 23.74 | 22.37 | 45.33  |
| 16452 | 'Jak2'   | 0.9   | 3.1   | 6.03 | 10.2 | 0.21 | 5.2   | 3.76 | 1.34  | 1.92  | 1.99   |
| 16453 | 'Jak3'   | 1     | 1.7   | 0    | 0    | 0.96 | 0     | 0.01 | 0.64  | 0     | 0.05   |
| 16456 | 'F11r'   | 0.46  | 0     | 0.04 | 0    | 35.2 | 23.24 | 0.02 | 0     | 0     | 5.69   |
| 16467 | 'Atcay'  | 85.62 | 76.83 | 93.9 | 62.3 | 96.8 | 82.21 | 115  | 117.6 | 86.35 | 87.49  |
| 16468 | 'Jarid2' | 1.4   | 2.79  | 4.57 | 7.73 | 2.15 | 2.2   | 0.71 | 2.74  | 5.04  | 4.54   |
| 16469 | 'Jrk'    | 2.28  | 0.9   | 0.96 | 0.01 | 2.78 | 1.42  | 1.77 | 1.36  | 0     | 1.86   |
| 16470 | 'Ush1g'  | 1.04  | 0     | 0    | 0    | 0    | 0     | 0    | 0     | 0     | 0      |
| 16475 | 'Ajuba'  | 0.05  | 0.01  | 0.07 | 0    | 0.33 | 0     | 0    | 0     | 0.02  | 0      |
| 16476 | 'Jun'    | 83.55 | 162.4 | 259  | 163  | 65.8 | 180.1 | 179  | 98.2  | 61.77 | 106.84 |
| 16477 | 'Junb'   | 100.9 | 281.6 | 143  | 311  | 10.2 | 150.6 | 121  | 87.83 | 65.88 | 194.1  |
| 16478 | 'Jund'   | 5.05  | 3.76  | 4.56 | 12.5 | 3.19 | 5.97  | 6    | 3.09  | 3.98  | 4.63   |
| 16480 | 'Jup'    | 8.99  | 10.54 | 3.19 | 6.67 | 7.48 | 0.73  | 2.43 | 2.95  | 4.75  | 13.87  |
| 16485 | 'Kcna1'  | 3.21  | 1.01  | 3.07 | 3.3  | 9.19 | 0.97  | 0.47 | 1.25  | 0     | 0.01   |
| 16490 | 'Kcna2'  | 1.36  | 1.33  | 2.54 | 0    | 4.26 | 0.92  | 1.91 | 1.21  | 1.09  | 1.33   |
| 16491 | 'Kcna3'  | 3.41  | 0.66  | 0.73 | 0    | 2.11 | 0     | 1.81 | 0.8   | 3.49  | 7.31   |
| 16492 | 'Kcna4'  | 1.25  | 2.89  | 0.19 | 0.32 | 3.07 | 1.71  | 1.97 | 2.75  | 4.77  | 2.73   |
| 16493 | 'Kcna5'  | 6.69  | 5.7   | 1.7  | 3.79 | 5.59 | 2.13  | 0.03 | 6.14  | 1.44  | 9.79   |
| 16494 | 'Kcna6'  | 6.91  | 3.26  | 15.1 | 2.81 | 8.18 | 5.79  | 15.7 | 7.08  | 13.23 | 1.79   |
| 16497 | 'Kcnab1' | 21.68 | 20.91 | 47.7 | 23   | 15.6 | 14.51 | 41.4 | 23.33 | 16.03 | 7.02   |
| 16498 | 'Kcnab2' | 13.45 | 7.11  | 33.9 | 6.23 | 28.6 | 7.68  | 25.9 | 20.21 | 6.14  | 8.24   |
| 16499 | 'Kcnab3' | 4.72  | 0.25  | 5.41 | 0    | 15.7 | 0.23  | 0.04 | 0     | 0.24  | 0.17   |
| 16500 | 'Kcnb1'  | 0.86  | 0.8   | 1.51 | 0.08 | 5.34 | 2.67  | 0.38 | 1.67  | 0.41  | 1.3    |
| 16502 | 'Kcnc1'  | 3.51  | 4.38  | 6.19 | 15.7 | 18.2 | 9.36  | 14.5 | 9.24  | 5.22  | 3.35   |
| 16504 | 'Kcnc3'  | 0.54  | 0.04  | 0.42 | 1.25 | 1    | 0.71  | 0.65 | 0.02  | 0.54  | 0.11   |
| 16506 | 'Kcnd1'  | 0.72  | 3.1   | 1.43 | 0.56 | 1.67 | 4.47  | 5.28 | 2.12  | 0.98  | 2.58   |
| 16508 | 'Kcnd2'  | 16.2  | 5.87  | 8.89 | 12.9 | 4.71 | 6.24  | 9.46 | 9.19  | 1.82  | 6.7    |
| 16509 | 'Kcne1'  | 0     | 0     | 0    | 0    | 0    | 0     | 0    | 0     | 0.01  | 0      |
| 16510 | 'Kcnh1'  | 2.29  | 0.91  | 2.41 | 0    | 1.72 | 2.91  | 4.44 | 4.46  | 3.22  | 1.3    |
| 16511 | 'Kcnh2'  | 3.27  | 1.71  | 2.7  | 1.52 | 9.17 | 5.21  | 0.03 | 0.31  | 2.4   | 5.34   |
| 16513 | 'Kcnj10' | 3.57  | 1.39  | 0.02 | 3.65 | 1.69 | 0.42  | 0.07 | 2.5   | 1.54  | 0.14   |
| 16514 | 'Kcnj11' | 0.07  | 0     | 0.02 | 5.98 | 3.82 | 4.73  | 0.47 | 0.92  | 4.21  | 0      |
| 16515 | 'Kcnj12' | 1.26  | 0     | 2.16 | 0    | 1.06 | 0.02  | 0.01 | 0.4   | 0     | 0      |
| 16517 | 'Kcnj16' | 7.86  | 0.17  | 8.18 | 0.09 | 0.32 | 5.8   | 0    | 5.34  | 4.42  | 11.15  |
| 16518 | 'Kcnj2'  | 1     | 0     | 0    | 0    | 0    | 0     | 0    | 0     | 0     | 0      |
| 16519 | 'Kcnj3'  | 8.67  | 7     | 5.37 | 11.4 | 3.46 | 1.19  | 4.13 | 5.25  | 3.51  | 4.92   |
| 16520 | 'Kcnj4'  | 0.02  | 0     | 0    | 0    | 1.92 | 0     | 0    | 0     | 0     | 1.03   |
| 16521 | 'Kcnj5'  | 0     | 3.62  | 0.03 | 0    | 0    | 4.45  | 1.41 | 0     | 2     | 5.72   |
| 16522 | 'Kcnj6'  | 4.1   | 9.29  | 1.6  | 9.91 | 3.9  | 15.03 | 4.74 | 3.68  | 17.18 | 0.82   |
| 16523 | 'Kcnj8'  | 0.02  | 0     | 0.02 | 0    | 0    | 0     | 0    | 0     | 0     | 0      |
| 16524 | 'Kcnj9'  | 17.51 | 18.83 | 26.6 | 2.72 | 15.5 | 26.98 | 24.4 | 16.8  | 22.86 | 32.75  |
| 16525 | 'Kcnk1'  | 31.34 | 30.31 | 36.8 | 11.9 | 44   | 28.64 | 28.1 | 52.04 | 24.7  | 30.75  |
| 16526 | 'Kcnk2'  | 5.98  | 14.73 | 7.78 | 7.97 | 2.13 | 1.99  | 17.1 | 11.91 | 6.99  | 3.95   |
| 16527 | 'Kcnk3'  | 0.13  | 1.18  | 1.54 | 0.04 | 7.59 | 3.51  | 5.89 | 2.36  | 5.46  | 3.36   |
| 16528 | 'Kcnk4'  | 0     | 0.55  | 0    | 0    | 2.32 | 2.03  | 5.67 | 3.89  | 3.83  | 1.57   |
| 16530 | 'Kcnk7'  | 0     | 1.58  | 0    | 0    | 0    | 0     | 0    | 0     | 0     | 0      |
| 16531 | 'Kcnma1' | 1.77  | 9.42  | 7.75 | 13.1 | 4.5  | 6.9   | 11   | 4.81  | 3.83  | 3.39   |
| 16532 | 'Kcnu1'  | 0     | 3.42  | 0    | 0    | 2.54 | 1.9   | 0    | 1.17  | 2.01  | 1.56   |
| 16535 | 'Kcnq1'  | 0     | 1.18  | 0    | 0    | 0    | 0     | 0    | 0     | 0     | 0.05   |
| 16536 | 'Kcnq2'  | 6.04  | 6.65  | 5.31 | 15.6 | 10.1 | 7.4   | 7.19 | 4.66  | 7.85  | 3.61   |
| 16538 | 'Kcns1'  | 0     | 2.43  | 4.01 | 0.04 | 4.71 | 4.39  | 1.39 | 0     | 12.03 | 7.22   |

|       |             |       |       |      |      |      |       |      |       |       |       |
|-------|-------------|-------|-------|------|------|------|-------|------|-------|-------|-------|
| 16539 | 'Kcns2'     | 0.79  | 2.08  | 9.15 | 3.37 | 0.37 | 0     | 3.28 | 3.2   | 0     | 3.34  |
| 16541 | 'Napsa'     | 0     | 0     | 0.26 | 0    | 0    | 0.09  | 0.82 | 0     | 0.44  | 0.47  |
| 16542 | 'Kdr'       | 0     | 0     | 0    | 0    | 0    | 0     | 0    | 0     | 1.05  | 0     |
| 16543 | 'Mdfic'     | 0     | 0     | 0    | 0    | 0    | 0.92  | 0    | 0.63  | 0     | 0     |
| 16545 | 'Kera'      | 0     | 0     | 0    | 0    | 0    | 1.13  | 0    | 0     | 0     | 0     |
| 16548 | 'Khk'       | 9.57  | 21.23 | 9.34 | 40.5 | 13.5 | 16.57 | 10.9 | 34.47 | 18.23 | 15.83 |
| 16549 | 'Khsrp'     | 1.78  | 0.85  | 1.99 | 2.28 | 4.02 | 1.76  | 4.24 | 1.65  | 2.34  | 1.94  |
| 16551 | 'Kif11'     | 0.76  | 0.1   | 1.99 | 2.51 | 0.45 | 0.1   | 0    | 0.33  | 0.29  | 0.4   |
| 16553 | 'Kif13a'    | 0.19  | 2.02  | 0.71 | 2.97 | 1.31 | 0.01  | 0.01 | 0.34  | 1.09  | 0.13  |
| 16554 | 'Kif13b'    | 1.01  | 1.42  | 0.31 | 0    | 2.16 | 0.81  | 0.51 | 1.01  | 0.35  | 0.95  |
| 16558 | 'Kif16b'    | 0.31  | 0.61  | 0.15 | 0    | 0.76 | 0.01  | 0    | 1.89  | 0.01  | 0.01  |
| 16559 | 'Kif17'     | 2.84  | 7.73  | 7.52 | 0.04 | 8.9  | 6.16  | 7.86 | 2.77  | 6.76  | 8.98  |
| 16560 | 'Kif1a'     | 56.3  | 49.14 | 72.1 | 56   | 53.7 | 44.29 | 57.2 | 31.74 | 35.55 | 66.09 |
| 16561 | 'Kif1b'     | 18.29 | 11.89 | 20.2 | 33.2 | 19.7 | 11.4  | 16   | 8.23  | 11.12 | 11.94 |
| 16562 | 'Kif1c'     | 0.56  | 0.56  | 0.65 | 0    | 0.23 | 1.06  | 1.26 | 0.28  | 2.28  | 0.33  |
| 16563 | 'Kif2a'     | 4.68  | 8.46  | 4.38 | 10.2 | 10.8 | 8.43  | 9.91 | 7.21  | 5.61  | 12.23 |
| 16564 | 'Kif21a'    | 36.49 | 48.76 | 35.6 | 39.3 | 37.8 | 45.76 | 43.3 | 37.38 | 28.17 | 31.64 |
| 16565 | 'Kif21b'    | 1.41  | 2.25  | 4.37 | 3.07 | 0.69 | 5.91  | 0.62 | 1.29  | 1.52  | 1.23  |
| 16568 | 'Kif3a'     | 73.07 | 71.92 | 71.2 | 61.7 | 66.9 | 75.33 | 75.3 | 86.3  | 56.74 | 82.84 |
| 16569 | 'Kif3b'     | 2.99  | 4.61  | 2.72 | 2.46 | 4.38 | 9.31  | 5.02 | 4.33  | 1.6   | 1.65  |
| 16570 | 'Kif3c'     | 15.94 | 12.24 | 31.2 | 15.7 | 6.91 | 4.63  | 8.75 | 15.97 | 20.33 | 12.98 |
| 16571 | 'Kif4'      | 0     | 0.02  | 0    | 0    | 0    | 0     | 0    | 0     | 0     | 0     |
| 16572 | 'Kif5a'     | 27.59 | 20.08 | 25.5 | 12.2 | 32.8 | 26.36 | 37.3 | 27.09 | 45.29 | 21.7  |
| 16573 | 'Kif5b'     | 35.27 | 35.76 | 21.6 | 42.9 | 57.9 | 28.64 | 31.1 | 27.73 | 32.98 | 36.16 |
| 16574 | 'Kif5c'     | 28.37 | 35.22 | 30   | 21.8 | 36.7 | 19.4  | 26.6 | 26.14 | 24.2  | 16.57 |
| 16576 | 'Kif7'      | 0     | 0.45  | 0    | 0    | 0.63 | 0.33  | 0.14 | 1.09  | 0.88  | 0     |
| 16578 | 'Kif9'      | 1.69  | 4.63  | 2.75 | 0    | 0.45 | 6.25  | 0    | 0.95  | 0.02  | 8.98  |
| 16579 | 'Kifap3'    | 62.46 | 50.98 | 77.1 | 31.6 | 47.9 | 51.88 | 84.3 | 65.82 | 62.05 | 55.16 |
| 16580 | 'Kifc5b'    | 3.8   | 0     | 0.35 | 0    | 0.91 | 4.2   | 0    | 2.56  | 0.53  | 0.02  |
| 16581 | 'Kifc2'     | 37.73 | 44.65 | 87.1 | 28.7 | 65.7 | 38.06 | 53.3 | 66.31 | 51.94 | 35.41 |
| 16582 | 'Kifc3'     | 11.7  | 3.93  | 8.73 | 4.09 | 4.99 | 4.43  | 21.4 | 4.18  | 8.71  | 4.56  |
| 16588 | 'Kin'       | 17.38 | 12.9  | 8.42 | 13.6 | 18.5 | 8.84  | 2.17 | 8.66  | 6.05  | 10.15 |
| 16589 | 'Uhmk1'     | 1.83  | 0.14  | 1.9  | 0.58 | 0    | 0     | 0    | 1.65  | 0     | 1.07  |
| 16590 | 'Kit'       | 0.02  | 3.23  | 3.86 | 0    | 3.89 | 0.38  | 3.78 | 0.49  | 6.38  | 3.65  |
| 16591 | 'Kl'        | 1.53  | 1.42  | 0    | 2.03 | 0.01 | 0.02  | 0.01 | 0     | 0     | 1.4   |
| 16592 | 'Fabp5'     | 127.5 | 113   | 158  | 222  | 97.8 | 144.3 | 127  | 176.8 | 100.9 | 69.73 |
| 16593 | 'Klc1'      | 314.7 | 291.7 | 317  | 313  | 279  | 226.8 | 386  | 261.6 | 248.7 | 175.6 |
| 16594 | 'Klc2'      | 6.7   | 4.55  | 9.31 | 3.81 | 11.7 | 1.35  | 7.54 | 7.81  | 16.48 | 6.07  |
| 16596 | 'Klf1'      | 0     | 0     | 0    | 0    | 3.57 | 0     | 0    | 0.9   | 0     | 0     |
| 16597 | 'Klf12'     | 4.81  | 2.26  | 7.27 | 2.8  | 4.83 | 7.25  | 15.2 | 4.78  | 3.24  | 6.77  |
| 16598 | 'Klf2'      | 0     | 3.16  | 2.13 | 0.06 | 0    | 0.03  | 0.03 | 0     | 0     | 0     |
| 16599 | 'Klf3'      | 0.11  | 0.88  | 4.09 | 0    | 0.01 | 3.16  | 0.02 | 0.05  | 1.47  | 2.72  |
| 16600 | 'Klf4'      | 0     | 2.3   | 2.69 | 13.7 | 0.42 | 6.61  | 0.91 | 0.85  | 0     | 3.59  |
| 16601 | 'Klf9'      | 6.04  | 3.86  | 5.29 | 5.57 | 5.22 | 0.57  | 4.69 | 4     | 0.03  | 0.25  |
| 16612 | 'Klk1'      | 4.48  | 0     | 0    | 0    | 0    | 0     | 0    | 0     | 0     | 0     |
| 16618 | 'Klk1b26'   | 0     | 0     | 0.05 | 0    | 0    | 0     | 0    | 0     | 0.05  | 0     |
| 16619 | 'Klk1b27'   | 0     | 0     | 0    | 0    | 0    | 0     | 0    | 0     | 0     | 3.52  |
| 16625 | 'Serpina3c' | 0     | 0     | 0.19 | 0    | 0    | 0     | 0    | 0.07  | 0     | 0     |
| 16633 | 'Klra2'     | 1.43  | 0.23  | 0    | 0    | 0    | 0     | 0    | 0     | 0     | 0     |
| 16646 | 'Kpna1'     | 20.06 | 10.75 | 22.4 | 27   | 16.3 | 3.62  | 15.8 | 18.8  | 20.16 | 18.1  |
| 16647 | 'Kpna2'     | 56.36 | 16.26 | 61.8 | 42.1 | 25.3 | 64.41 | 20.3 | 53.03 | 31.53 | 57.47 |
| 16648 | 'Kpna3'     | 34.59 | 23.56 | 21.8 | 14.7 | 16.4 | 7.19  | 17.8 | 25    | 14.89 | 15.63 |
| 16649 | 'Kpna4'     | 1.29  | 4.04  | 4.99 | 7.68 | 3.85 | 1.99  | 3.38 | 3.89  | 7.33  | 1.84  |
| 16650 | 'Kpna6'     | 5.7   | 4.7   | 0.97 | 2.75 | 4.89 | 1.44  | 0.52 | 5.27  | 1.54  | 3.87  |
| 16651 | 'Sspn'      | 3.44  | 3.99  | 1.88 | 0.01 | 3.46 | 1.77  | 0.02 | 1.59  | 2.42  | 3.65  |
| 16653 | 'Kras'      | 5.5   | 7.69  | 5.74 | 13.3 | 6.13 | 5.12  | 3.22 | 2.31  | 2.68  | 3.41  |
| 16656 | 'Hivep3'    | 9.4   | 14.15 | 3.79 | 18.2 | 6.05 | 7.56  | 9.69 | 2.03  | 17.26 | 4.61  |
| 16658 | 'Mafb'      | 0.46  | 0     | 0.03 | 3.77 | 0.73 | 4.24  | 2.8  | 1.4   | 0     | 0.02  |

|       |             |       |       |      |      |      |       |      |       |       |         |
|-------|-------------|-------|-------|------|------|------|-------|------|-------|-------|---------|
| 16661 | 'Krt10'     | 4.07  | 6.81  | 1.31 | 0    | 5.19 | 10.8  | 8.47 | 2.35  | 4.28  | 7.56    |
| 16667 | 'Krt17'     | 0     | 9.98  | 0.03 | 0    | 0    | 3.42  | 0.2  | 2.61  | 0     | 4.56    |
| 16668 | 'Krt18'     | 0     | 5.23  | 0    | 0    | 0    | 0     | 0    | 1.46  | 5.36  | 0       |
| 16669 | 'Krt19'     | 0.05  | 2.79  | 0    | 0    | 0    | 7.2   | 0    | 0     | 0     | 3.83    |
| 16673 | 'Krt36'     | 0.1   | 0     | 0    | 0    | 0    | 0     | 0    | 0     | 0     | 0       |
| 16675 | 'Krt27'     | 0     | 0     | 0    | 0    | 10.3 | 0     | 0    | 0     | 0     | 0       |
| 16678 | 'Krt1'      | 6.61  | 4.12  | 0.88 | 13.8 | 2.28 | 6.51  | 1.65 | 7.4   | 5.28  | 4.8     |
| 16680 | 'Krt84'     | 0     | 0     | 0    | 0    | 0    | 0     | 0    | 0     | 0.18  | 0       |
| 16681 | 'Krt2'      | 0     | 0     | 0    | 0    | 0    | 0     | 3.27 | 0     | 0     | 0       |
| 16691 | 'Krt8'      | 0     | 0     | 0.03 | 0.03 | 24.3 | 0     | 0    | 0     | 0     | 0.07    |
| 16694 | 'Krtap12-1' | 0     | 0.08  | 0    | 0    | 0    | 0     | 0    | 0     | 0     | 0       |
| 16706 | 'Ksr1'      | 1.88  | 1.11  | 0    | 3.38 | 1.49 | 0     | 1.96 | 0.1   | 2.03  | 0.26    |
| 16709 | 'Ktn1'      | 10.64 | 14.11 | 17.1 | 16.5 | 12.1 | 9.91  | 7.56 | 8.39  | 12.55 | 12.59   |
| 16716 | 'Ky'        | 0     | 0     | 0    | 0    | 0    | 0     | 0    | 0     | 0     | 1.08    |
| 16728 | 'L1cam'     | 24.05 | 18.29 | 44.9 | 6.97 | 32.3 | 6.61  | 37.4 | 26.18 | 27.5  | 45.9    |
| 16763 | 'Lad1'      | 0     | 0     | 2.01 | 0    | 0    | 0     | 0.02 | 0     | 0     | 0       |
| 16764 | 'Aff3'      | 1.26  | 0.82  | 1    | 0.18 | 3.34 | 0     | 0.66 | 1.46  | 1.74  | 1.08    |
| 16765 | 'Stmn1'     | 1226  | 931.3 | 993  | 1077 | 1525 | 1982  | 1264 | 1157  | 1240  | 1341.45 |
| 16768 | 'Lag3'      | 0.77  | 0.67  | 2.16 | 0    | 6.38 | 0     | 0    | 0.02  | 0     | 0       |
| 16772 | 'Lama1'     | 0.04  | 0     | 0    | 0    | 0    | 0     | 0    | 0.51  | 0     | 0       |
| 16773 | 'Lama2'     | 0.23  | 0.01  | 0    | 1.01 | 0    | 1.91  | 0    | 2.07  | 0.49  | 0       |
| 16774 | 'Lama3'     | 0.61  | 0     | 0    | 0.16 | 0    | 0     | 0.09 | 0.35  | 0     | 0       |
| 16775 | 'Lama4'     | 0     | 0     | 0.75 | 0.01 | 0    | 0     | 0    | 0     | 0     | 0       |
| 16776 | 'Lama5'     | 0     | 0.17  | 0.07 | 0    | 0.31 | 0.04  | 0    | 0     | 0     | 0       |
| 16777 | 'Lamb1'     | 0.94  | 3.13  | 1.95 | 1.95 | 0.83 | 1.44  | 0    | 1.3   | 0     | 2.67    |
| 16779 | 'Lamb2'     | 0.87  | 0.49  | 0.01 | 0    | 0.76 | 0.83  | 0.01 | 0     | 0.33  | 0.36    |
| 16780 | 'Lamb3'     | 8.37  | 60.5  | 1.54 | 30.3 | 1.02 | 9.02  | 0.05 | 3.64  | 0.03  | 3.06    |
| 16782 | 'Lamc2'     | 0     | 0.2   | 0.01 | 4.15 | 4.11 | 0     | 0.51 | 0.01  | 0     | 0.07    |
| 16783 | 'Lamp1'     | 70.76 | 29.41 | 65.2 | 186  | 73.7 | 24.4  | 59.8 | 12.38 | 37.26 | 16.81   |
| 16784 | 'Lamp2'     | 34.09 | 29.66 | 29.2 | 40.7 | 28.1 | 31.09 | 37   | 16.67 | 16.48 | 41.66   |
| 16785 | 'Rpsa'      | 145.4 | 102.6 | 146  | 76.1 | 173  | 165.5 | 111  | 125.4 | 103.1 | 90.91   |
| 16792 | 'Laptm5'    | 2.33  | 7.36  | 2.5  | 5.32 | 31.2 | 46.48 | 0    | 2.87  | 0     | 0       |
| 16795 | 'Large1'    | 1.96  | 6.47  | 6.86 | 5.5  | 2.31 | 0.42  | 3.69 | 4.71  | 0.01  | 4.93    |
| 16796 | 'Lasp1'     | 23.48 | 27.6  | 34.3 | 14.4 | 29.8 | 21.23 | 31.1 | 12.29 | 34.57 | 26.95   |
| 16797 | 'Lat'       | 0     | 0     | 0    | 1.83 | 0    | 0     | 2.11 | 0     | 1.42  | 0       |
| 16798 | 'Lats1'     | 0.4   | 1.2   | 0.07 | 1.52 | 1.26 | 1.51  | 0    | 0.75  | 1.94  | 1.07    |
| 16800 | 'Arhgef2'   | 8.06  | 3.91  | 11.3 | 7.99 | 11.2 | 5.43  | 6.89 | 3.21  | 8.63  | 15.07   |
| 16801 | 'Arhgef1'   | 6.25  | 10.54 | 6.61 | 12   | 9.05 | 7.39  | 4.4  | 4.14  | 8.12  | 7.15    |
| 16803 | 'Lbp'       | 0     | 0     | 0    | 0    | 0    | 0     | 0    | 0.03  | 0     | 0       |
| 16816 | 'Lcat'      | 8.08  | 4.27  | 2.55 | 8.57 | 0    | 4.72  | 0    | 0     | 6.61  | 6.7     |
| 16818 | 'Lck'       | 0.35  | 2.93  | 1.97 | 0    | 4.36 | 0.75  | 1.4  | 2.47  | 0.36  | 2.09    |
| 16822 | 'Lcp2'      | 2.22  | 2.84  | 3.46 | 6.01 | 0    | 6.78  | 2.54 | 0.4   | 0.04  | 1.22    |
| 16825 | 'Ldb1'      | 8.72  | 18.19 | 13.2 | 13.8 | 16.7 | 7.48  | 25.4 | 18.73 | 13.75 | 20.97   |
| 16826 | 'Ldb2'      | 34.69 | 19.72 | 26.3 | 11.5 | 44.9 | 16.47 | 37.6 | 28.19 | 5.94  | 11.4    |
| 16828 | 'Ldha'      | 410.9 | 462.9 | 443  | 381  | 441  | 543.1 | 510  | 475   | 420.6 | 612.17  |
| 16832 | 'Ldhb'      | 630.5 | 489.8 | 819  | 806  | 774  | 1101  | 714  | 843.6 | 756.4 | 612.38  |
| 16833 | 'Ldhc'      | 0     | 0     | 0    | 0    | 0    | 0     | 0    | 0     | 0     | 0.04    |
| 16834 | 'Cog1'      | 34.53 | 27.34 | 29.1 | 1.78 | 20.5 | 12.77 | 28.4 | 15.15 | 30.48 | 7.5     |
| 16835 | 'Ldlr'      | 1.6   | 4.5   | 8.19 | 8.97 | 1.32 | 0.03  | 2.63 | 2.47  | 0     | 1.26    |
| 16840 | 'Cnmd'      | 3.42  | 0     | 0    | 0    | 5.51 | 0.21  | 7.03 | 0     | 3.14  | 4.29    |
| 16841 | 'Lect2'     | 0     | 0.52  | 0    | 2.35 | 0.65 | 0     | 0    | 0     | 0.02  | 0.34    |
| 16842 | 'Lef1'      | 0     | 0     | 0    | 0    | 0    | 0     | 0    | 0.02  | 0     | 0       |
| 16847 | 'Lepr'      | 1.1   | 2.1   | 1.8  | 0    | 2.6  | 4.3   | 3.6  | 1.9   | 7.7   | 7.1     |
| 16848 | 'Lfng'      | 2.58  | 0.36  | 0.04 | 0.1  | 0    | 0.16  | 0    | 0.24  | 0.88  | 0       |
| 16852 | 'Lgals1'    | 0.35  | 4.81  | 2.98 | 11.5 | 7.13 | 5.34  | 0.2  | 1.33  | 1.08  | 1.81    |
| 16854 | 'Lgals3'    | 0     | 1.63  | 0    | 0    | 4.41 | 0     | 0.04 | 2.46  | 3.14  | 0       |
| 16855 | 'Lgals4'    | 0.44  | 13.28 | 3.32 | 1.29 | 0.03 | 0.03  | 0    | 0     | 0.61  | 5.28    |
| 16858 | 'Lgals7'    | 0     | 0     | 0    | 10.4 | 0    | 0     | 0    | 0     | 0     | 0       |

|       |           |       |       |      |      |      |       |      |       |       |        |
|-------|-----------|-------|-------|------|------|------|-------|------|-------|-------|--------|
| 16859 | 'Lgals9'  | 0     | 0     | 0.03 | 27.9 | 9.82 | 33.64 | 0    | 0     | 0.06  | 3.3    |
| 16865 | 'Eif2d'   | 21.2  | 18.73 | 33.1 | 19.7 | 14.9 | 27.39 | 52.4 | 27.44 | 26.74 | 17.86  |
| 16867 | 'Lhcgr'   | 0     | 0     | 0    | 0    | 0    | 0     | 0    | 0     | 0.97  | 0      |
| 16869 | 'Lhx1'    | 1.33  | 0     | 0    | 0    | 0.25 | 3.01  | 3.4  | 0.1   | 2.04  | 3.95   |
| 16870 | 'Lhx2'    | 1.67  | 1.41  | 3.53 | 0.03 | 4    | 13.13 | 0.06 | 0     | 3.34  | 5.33   |
| 16872 | 'Lhx4'    | 0     | 0.01  | 0.4  | 0    | 0    | 0     | 0    | 0.29  | 0     | 0      |
| 16873 | 'Lhx5'    | 7.15  | 1.85  | 10.3 | 8.47 | 3.25 | 18.41 | 4.34 | 5.94  | 11.13 | 8.96   |
| 16874 | 'Lhx6'    | 0     | 10.37 | 0    | 0    | 4.73 | 0.2   | 7.99 | 3.58  | 0     | 0.01   |
| 16875 | 'Lhx8'    | 0.02  | 0     | 0    | 0    | 31.5 | 6.08  | 7.16 | 0     | 0     | 0      |
| 16876 | 'Lhx9'    | 0.88  | 1.93  | 6.04 | 8.75 | 12.8 | 28.41 | 4.45 | 0.33  | 7.65  | 21.13  |
| 16880 | 'Lifr'    | 10.85 | 3.2   | 3.89 | 3.98 | 2.55 | 1.19  | 4.27 | 2.73  | 5.61  | 3.55   |
| 16881 | 'Lig1'    | 9.05  | 6.89  | 14.3 | 0.51 | 5.81 | 9.23  | 7.79 | 5.32  | 8.93  | 9.77   |
| 16882 | 'Lig3'    | 3.8   | 1.26  | 5.27 | 1.12 | 7.88 | 0     | 1.65 | 2.68  | 5.92  | 4.01   |
| 16885 | 'Limk1'   | 3.37  | 5.78  | 3.62 | 0    | 2.07 | 0.84  | 1.23 | 6.14  | 0.03  | 0.98   |
| 16886 | 'Limk2'   | 47.7  | 51.19 | 42.2 | 13.2 | 39.7 | 25.7  | 61.3 | 57.68 | 50.99 | 31.92  |
| 16889 | 'Lipa'    | 5.72  | 9.5   | 3.05 | 0    | 2.24 | 5.74  | 6.91 | 13.91 | 11.91 | 8.64   |
| 16890 | 'Lipe'    | 1.04  | 3.23  | 0.96 | 0.59 | 8.46 | 10.6  | 12.3 | 6.75  | 5.07  | 4.59   |
| 16891 | 'Lipg'    | 3.06  | 0.24  | 0.01 | 0    | 0    | 0     | 0    | 0     | 0     | 0      |
| 16897 | 'Ligl1'   | 13.64 | 3.52  | 3.26 | 6.41 | 2.43 | 3.69  | 0.54 | 1.53  | 6.96  | 2.4    |
| 16898 | 'Rps2'    | 104   | 161.9 | 187  | 250  | 129  | 53.15 | 113  | 64.17 | 126.2 | 47.51  |
| 16904 | 'Gzmm'    | 0     | 1.9   | 0.98 | 2.32 | 0    | 0     | 0    | 1.13  | 6.63  | 0.79   |
| 16905 | 'Lmna'    | 45.65 | 48.91 | 53.1 | 99.6 | 31.3 | 34.42 | 20.2 | 32.51 | 40.83 | 44.43  |
| 16906 | 'Lmnb1'   | 0.57  | 2.78  | 3.93 | 1.07 | 2.22 | 0     | 0    | 1.45  | 0     | 2.88   |
| 16907 | 'Lmnb2'   | 1.71  | 6.97  | 11.7 | 6.44 | 6.63 | 0.59  | 6.59 | 6.03  | 1.58  | 2.03   |
| 16909 | 'Lmo2'    | 1.32  | 0     | 3.88 | 16.6 | 1.61 | 4.08  | 4.84 | 0     | 3.18  | 0.2    |
| 16911 | 'Lmo4'    | 9.33  | 11.17 | 17.6 | 11.9 | 31.9 | 27.65 | 30.6 | 35    | 7.81  | 17.47  |
| 16912 | 'Psemb9'  | 0     | 0     | 0    | 13.2 | 5.29 | 10.23 | 0    | 0     | 4.52  | 0.06   |
| 16913 | 'Psemb8'  | 3.25  | 2.49  | 3.18 | 5.35 | 0    | 1.46  | 0.04 | 10.08 | 8.35  | 6.54   |
| 16918 | 'Mycl'    | 2.71  | 5.61  | 5.87 | 18.4 | 2.22 | 2.8   | 0.08 | 6.18  | 1.95  | 5.87   |
| 16922 | 'Phyh'    | 137.6 | 141.9 | 125  | 142  | 178  | 199.6 | 143  | 144.2 | 122.9 | 199.79 |
| 16923 | 'Sh2b3'   | 0.9   | 1.27  | 0    | 4.41 | 0.06 | 0     | 0    | 0.18  | 0.04  | 3.99   |
| 16924 | 'Lnx1'    | 16.73 | 24.31 | 18   | 10.2 | 12.2 | 15.51 | 50.9 | 18.25 | 23.17 | 24.73  |
| 16939 | 'Lor'     | 0.77  | 0.81  | 0.38 | 8.99 | 1.56 | 3.87  | 2.72 | 1.07  | 0.15  | 0.7    |
| 16949 | 'Loxl1'   | 2.64  | 0.26  | 6.07 | 6.02 | 8.77 | 25.04 | 0.01 | 7.79  | 17.82 | 6.14   |
| 16950 | 'Loxl3'   | 0.35  | 0     | 1.89 | 0    | 1.75 | 0.46  | 0.01 | 0.32  | 0.33  | 0      |
| 16956 | 'Lpl'     | 0.22  | 1.12  | 0.85 | 0.14 | 1.87 | 0.25  | 0.16 | 0.24  | 0.23  | 0.28   |
| 16969 | 'Zbtb7a'  | 7.43  | 3.79  | 6.13 | 5.91 | 7.96 | 0.95  | 6.22 | 2.77  | 4.66  | 3.39   |
| 16971 | 'Lrp1'    | 9.05  | 6.93  | 19   | 9.16 | 9.01 | 5.81  | 15.1 | 7.67  | 8.51  | 5.98   |
| 16973 | 'Lrp5'    | 0     | 0     | 0.04 | 0    | 0.01 | 0     | 0    | 0     | 0     | 0      |
| 16974 | 'Lrp6'    | 0.61  | 0.21  | 0.13 | 0.68 | 0.1  | 0.1   | 2.51 | 1.04  | 0.48  | 0      |
| 16975 | 'Lrp8'    | 0.77  | 5.33  | 1.28 | 8.16 | 1.65 | 3.17  | 3.25 | 1.63  | 3.33  | 1.78   |
| 16976 | 'Lrpap1'  | 287.3 | 434.8 | 218  | 378  | 261  | 426.1 | 277  | 365.8 | 501.9 | 558.69 |
| 16977 | 'Lrrc23'  | 0.03  | 5.45  | 0.82 | 0    | 0.42 | 0.74  | 0    | 4.72  | 0.11  | 6.64   |
| 16978 | 'Lrrfip1' | 30.57 | 19.38 | 17.3 | 63.5 | 27.3 | 6.81  | 31.5 | 20.79 | 24.54 | 14.97  |
| 16979 | 'Lrrn1'   | 7.06  | 9.61  | 16.4 | 7.44 | 4.19 | 0.92  | 36.1 | 6.37  | 3.97  | 4.16   |
| 16980 | 'Lrrn2'   | 33.55 | 33.86 | 46.5 | 17.3 | 39.1 | 26.43 | 30.8 | 53.13 | 54.71 | 27     |
| 16981 | 'Lrrn3'   | 43.54 | 25.96 | 14.5 | 15.9 | 27.3 | 13.23 | 21.8 | 37.33 | 11.73 | 43.72  |
| 16985 | 'Lsp1'    | 0     | 0     | 7.93 | 0    | 4.09 | 0.97  | 0    | 0     | 4.72  | 1.81   |
| 16987 | 'Lss'     | 8.22  | 3.5   | 10.6 | 18.7 | 7.33 | 1.51  | 0.03 | 0.27  | 6.33  | 0.46   |
| 16988 | 'Lst1'    | 0     | 1.45  | 2.38 | 0    | 3.78 | 1.67  | 20.6 | 0.22  | 0     | 2.03   |
| 16992 | 'Lta'     | 3.59  | 0.04  | 3.91 | 0    | 0    | 0     | 5.64 | 0     | 0     | 0      |
| 16993 | 'Lta4h'   | 39.53 | 44.11 | 67   | 61.6 | 25.1 | 42.44 | 23.4 | 33.77 | 50.25 | 56.22  |
| 16994 | 'Ltb'     | 0     | 0     | 0.05 | 0    | 0    | 0     | 3.81 | 0     | 0     | 2.61   |
| 16997 | 'Ltbp2'   | 0     | 0     | 3.15 | 1.42 | 0    | 0     | 0    | 0.37  | 0     | 0      |
| 16998 | 'Ltbp3'   | 4.86  | 10.79 | 3.9  | 8.02 | 3.23 | 0.71  | 5.93 | 2.8   | 5.36  | 2.73   |
| 17000 | 'Ltbr'    | 0     | 0     | 6.07 | 0.46 | 0    | 0.04  | 0    | 0     | 0.02  | 4.16   |
| 17001 | 'Ltc4s'   | 3.61  | 0     | 0    | 0    | 10.2 | 8.19  | 0    | 3.54  | 0     | 11.18  |
| 17005 | 'Ltk'     | 0     | 0     | 0    | 0    | 2.86 | 0     | 0.18 | 0     | 0     | 0      |

|        |           |       |       |      |      |      |       |      |       |       |        |
|--------|-----------|-------|-------|------|------|------|-------|------|-------|-------|--------|
| 17025  | 'Alad'    | 53.11 | 52.84 | 67.9 | 63   | 57.8 | 65.4  | 66.4 | 68.28 | 80.88 | 49.91  |
| 17035  | 'Lxn'     | 64.82 | 51.55 | 20.8 | 40.6 | 18   | 84.44 | 68.1 | 66.86 | 60.23 | 69.31  |
| 170439 | 'Elov16'  | 8.09  | 8.87  | 8.76 | 6.88 | 7.21 | 12.26 | 9.54 | 15.02 | 19.09 | 7.58   |
| 170441 | 'Slc2a10' | 0     | 0     | 0    | 0    | 0.01 | 0     | 0    | 0     | 0     | 0      |
| 170442 | 'Bbox1'   | 3.28  | 5.01  | 0.03 | 7.4  | 0    | 1.73  | 6    | 0     | 0     | 2.14   |
| 170459 | 'Stard4'  | 12.05 | 13.31 | 5.58 | 7.71 | 14.8 | 5.5   | 23.6 | 13.56 | 4.21  | 7.04   |
| 170460 | 'Stard5'  | 0.2   | 1.89  | 0.85 | 0.07 | 4.77 | 0     | 0    | 1.25  | 0     | 0.03   |
| 170461 | 'Stard6'  | 0.03  | 3.83  | 0    | 0    | 0    | 0     | 0.11 | 0.32  | 0.03  | 0      |
| 170472 | 'Recql5'  | 14.65 | 13.64 | 10.4 | 4.5  | 4.91 | 0.06  | 13.7 | 4.23  | 4.05  | 16.17  |
| 170483 | 'Grin3b'  | 0     | 0     | 0.31 | 0    | 0    | 0     | 0    | 0     | 0     | 0      |
| 170484 | 'Nphs2'   | 0     | 0     | 0    | 3.61 | 0    | 0     | 0    | 0     | 0     | 0      |
| 170571 | 'Cntnap4' | 40.62 | 21.19 | 16   | 11.5 | 21.2 | 7.02  | 30   | 30.93 | 36.69 | 32.17  |
| 170574 | 'Sp7'     | 0     | 0     | 0    | 2.04 | 0    | 0     | 0    | 0     | 0     | 0      |
| 17060  | 'Blnk'    | 0     | 0     | 0    | 0    | 0    | 2.31  | 0.02 | 2.58  | 0     | 0      |
| 170625 | 'Snx18'   | 0.6   | 0.96  | 1.38 | 2.3  | 1.94 | 0.6   | 0.45 | 1.17  | 0     | 1.61   |
| 170638 | 'Hpcal4'  | 110.5 | 143.7 | 60.5 | 79.7 | 67.9 | 92.18 | 87.5 | 112.7 | 46.9  | 80.93  |
| 17064  | 'Cd93'    | 0     | 0     | 0.01 | 0.02 | 0.02 | 0.01  | 0    | 0     | 0.01  | 0.11   |
| 170643 | 'Kirrel'  | 0     | 0.06  | 0    | 0    | 0    | 0     | 0.03 | 0.12  | 0.17  | 0      |
| 170644 | 'Ubn1'    | 1.58  | 0.56  | 2.21 | 6.46 | 2.69 | 0.92  | 0.91 | 0.21  | 1.37  | 2.71   |
| 17067  | 'Ly6c1'   | 0.05  | 0     | 0.12 | 0    | 0.91 | 0     | 0.06 | 0     | 0     | 0      |
| 170676 | 'Peg10'   | 2.95  | 1.72  | 1.58 | 0.07 | 0.2  | 2.24  | 7.16 | 3.79  | 10.58 | 13.92  |
| 170677 | 'Cdhr1'   | 0     | 0.53  | 2.37 | 0    | 1.52 | 0.01  | 0.01 | 0     | 4.33  | 2.17   |
| 17069  | 'Ly6e'    | 164.8 | 150.7 | 116  | 193  | 104  | 272.7 | 118  | 151.2 | 176.9 | 166.71 |
| 170706 | 'Tmem37'  | 0.04  | 0     | 0.05 | 0    | 0    | 0     | 0    | 0     | 0     | 0      |
| 170707 | 'Usp48'   | 6.46  | 10.2  | 10.8 | 15.8 | 15   | 3.94  | 9.96 | 4.55  | 11.11 | 4.96   |
| 170711 | 'Otud7a'  | 0     | 0.21  | 0.01 | 1.21 | 0.35 | 2     | 1.44 | 0.69  | 0.17  | 0.74   |
| 170716 | 'Cyp4f13' | 0.39  | 0     | 4.15 | 6.12 | 4.11 | 0     | 12   | 4.73  | 4.93  | 11.95  |
| 170718 | 'Idh3b'   | 271.6 | 233.3 | 422  | 221  | 336  | 348.4 | 401  | 325.2 | 304.7 | 312.7  |
| 170719 | 'Oxr1'    | 31.08 | 21.05 | 48.4 | 38.2 | 35   | 41.48 | 43.3 | 41.69 | 40.4  | 55.26  |
| 170721 | 'Papln'   | 0     | 0     | 0.19 | 1.69 | 0.35 | 0     | 0    | 0.26  | 0.6   | 1.03   |
| 170728 | 'Rtn4ip1' | 13.99 | 5.36  | 9.58 | 5.62 | 15.4 | 9.62  | 3.18 | 11.43 | 5.2   | 19.96  |
| 170729 | 'Scrt1'   | 0     | 0     | 0.08 | 0    | 0    | 0.01  | 0    | 0.06  | 0.73  | 0      |
| 170731 | 'Mfn2'    | 25.34 | 29.83 | 66.6 | 18.6 | 25.5 | 8.02  | 61.8 | 42.51 | 52.54 | 37.32  |
| 170732 | 'Trhr2'   | 0     | 0     | 0    | 0    | 0    | 0     | 0    | 2.34  | 0     | 0      |
| 170734 | 'Zscan5b' | 0.02  | 0.02  | 0    | 0    | 0.1  | 0     | 0    | 0     | 0.02  | 0.02   |
| 170735 | 'Arr3'    | 0     | 0     | 0    | 0    | 0    | 0     | 0    | 0     | 0     | 2.64   |
| 170736 | 'Parvb'   | 0.07  | 1.61  | 0.24 | 2.86 | 1.06 | 0     | 0    | 1.33  | 2.42  | 3.46   |
| 170737 | 'Znrf1'   | 12.07 | 13.14 | 13.2 | 15.9 | 11.7 | 15.19 | 13.3 | 10.35 | 8.33  | 9.93   |
| 170738 | 'Kcnh7'   | 6.09  | 2.03  | 1.97 | 5.03 | 2.4  | 3.45  | 3.85 | 3.32  | 2.21  | 10.83  |
| 170740 | 'Zfp287'  | 2.25  | 3.88  | 2.49 | 1.61 | 2.42 | 3.86  | 11   | 4.09  | 2.07  | 10.3   |
| 170741 | 'Pilrb1'  | 0     | 0     | 0    | 0    | 6.39 | 0     | 0    | 0     | 0     | 0      |
| 170742 | 'Sertad3' | 0     | 0     | 9.89 | 7.29 | 5.52 | 5.14  | 6.1  | 3     | 2.8   | 0.97   |
| 170743 | 'Tlr7'    | 0     | 0     | 0    | 0    | 0    | 0.05  | 0    | 0     | 0     | 0      |
| 170748 | 'Smco4'   | 2.36  | 3.14  | 0.05 | 0    | 0    | 4.85  | 13.6 | 4.38  | 2.87  | 3.59   |
| 170749 | 'Mtmr4'   | 11.06 | 4.02  | 12.1 | 7.17 | 3.92 | 2.86  | 3.15 | 7.12  | 7.02  | 6.62   |
| 17075  | 'Epcam'   | 0     | 0     | 2.03 | 0    | 22.2 | 0     | 0    | 0     | 0     | 0.04   |
| 170750 | 'Xpnpep1' | 20.02 | 17.75 | 10.1 | 31.1 | 15.7 | 9.66  | 16.7 | 37.61 | 38.06 | 41.09  |
| 170752 | 'Bco2'    | 0     | 1.62  | 0.05 | 0    | 0    | 0     | 0    | 0     | 0     | 0      |
| 170753 | 'Zfp704'  | 0.73  | 0.52  | 0.83 | 1.83 | 0.87 | 0.75  | 1.42 | 0.24  | 1.73  | 1.89   |
| 170755 | 'Sgk3'    | 0.44  | 0.14  | 0.07 | 0.09 | 0.02 | 0.04  | 0.04 | 0.3   | 0     | 0.02   |
| 170756 | 'Slc8b1'  | 0.64  | 0.96  | 0.15 | 0.12 | 0.59 | 5.83  | 2.47 | 0.03  | 0.02  | 0.09   |
| 170757 | 'Adgrl4'  | 0     | 0     | 0    | 0    | 0    | 0     | 0    | 0     | 0.6   | 0      |
| 170758 | 'Rac3'    | 239.9 | 107.2 | 230  | 154  | 134  | 146.1 | 246  | 83.96 | 122.2 | 64.76  |
| 170759 | 'Atp13a1' | 22.63 | 17.02 | 23.8 | 37.1 | 14.4 | 14.39 | 34.2 | 31.67 | 36.12 | 33.12  |
| 170760 | 'Acbd3'   | 4.47  | 3.61  | 2.27 | 12.7 | 7.39 | 6.49  | 4.1  | 2.54  | 1.3   | 2.8    |
| 170761 | 'Pdzd3'   | 1.21  | 5.48  | 2.97 | 10.6 | 7.4  | 0     | 0    | 1.89  | 4.83  | 1.27   |
| 170762 | 'Nup155'  | 2.24  | 0.23  | 4.59 | 0    | 1.15 | 0     | 0.06 | 2.33  | 1.27  | 0.41   |
| 170763 | 'Zfp87'   | 9.26  | 5.99  | 2.68 | 0.29 | 10.9 | 9.35  | 16.1 | 12.74 | 0.38  | 5.01   |

|        |            |       |       |      |      |      |       |      |       |       |        |
|--------|------------|-------|-------|------|------|------|-------|------|-------|-------|--------|
| 170765 | 'Ripply3'  | 1.6   | 1.17  | 1.18 | 2.71 | 1.91 | 0.47  | 0.63 | 0.6   | 1.82  | 1.05   |
| 170767 | 'Rfxap'    | 2.61  | 1.35  | 2.78 | 6.64 | 2.64 | 2.78  | 0    | 1.74  | 6.46  | 0      |
| 170768 | 'Pfkfb3'   | 9.83  | 3.98  | 6.74 | 5.43 | 2.35 | 1.12  | 7.05 | 6.27  | 3.22  | 8.36   |
| 170770 | 'Bbc3'     | 1.04  | 1.19  | 0.67 | 6.66 | 0    | 0.09  | 0    | 1.68  | 1.63  | 0.49   |
| 170771 | 'Khdrbs2'  | 23.52 | 23.46 | 43.8 | 18.3 | 54.5 | 38.61 | 38   | 23.75 | 11.61 | 30.76  |
| 170772 | 'Glcci1'   | 2.58  | 2.93  | 3.17 | 0.62 | 3.3  | 0.94  | 1.14 | 0.43  | 0.01  | 3.06   |
| 170776 | 'Cd209c'   | 5.98  | 8.9   | 9.77 | 16.9 | 7.39 | 11.81 | 10.9 | 9.07  | 9.21  | 6.88   |
| 170787 | 'Hdac10'   | 7.22  | 11.18 | 17.5 | 0.38 | 18.1 | 9.13  | 4.43 | 8.66  | 17.78 | 17.74  |
| 170788 | 'Crb1'     | 1.54  | 3.3   | 0    | 0    | 0.7  | 0.04  | 0    | 1.41  | 0.01  | 4      |
| 170789 | 'Acot8'    | 33.36 | 31.7  | 36.2 | 31   | 13.5 | 22.38 | 16.7 | 42.1  | 36.43 | 30.14  |
| 17079  | 'Cd180'    | 0     | 0     | 0    | 0    | 0    | 0.22  | 0    | 0     | 0.17  | 0      |
| 170790 | 'Mlc1'     | 59.63 | 33.48 | 30.6 | 65.6 | 35.1 | 68.56 | 27.9 | 15.25 | 45.66 | 31.45  |
| 170791 | 'Rbm39'    | 79.55 | 120.3 | 87.5 | 147  | 79   | 107.7 | 89.5 | 78.78 | 70.9  | 80.17  |
| 170799 | 'Rtkn2'    | 0.08  | 0.01  | 0.05 | 0    | 0.79 | 0.83  | 0.01 | 1.38  | 0     | 0      |
| 170813 | 'Ms4a3'    | 0     | 0     | 0.15 | 0    | 0    | 0     | 0    | 0     | 0     | 0      |
| 17082  | 'Il1rl1'   | 0     | 0     | 0.02 | 0.01 | 0.03 | 0.02  | 0    | 0.01  | 0.01  | 0.01   |
| 170822 | 'Usp33'    | 35.42 | 49.98 | 50   | 50.2 | 25.5 | 17.61 | 28.8 | 37.78 | 50.94 | 50.94  |
| 170823 | 'Glmn'     | 6.03  | 11.84 | 8.82 | 6.37 | 3.72 | 8.96  | 11.8 | 18.81 | 9.82  | 6.35   |
| 170826 | 'Ppargc1b' | 4.26  | 4.02  | 8.83 | 3.48 | 3.11 | 1.78  | 8.47 | 8.21  | 1.07  | 2.77   |
| 170829 | 'Tram2'    | 0.03  | 0     | 0.04 | 0    | 0    | 0     | 0    | 0     | 0     | 0.25   |
| 17083  | 'Tmed1'    | 42.92 | 46.26 | 44   | 32.6 | 90.8 | 35.76 | 36.9 | 46.23 | 59.33 | 84.77  |
| 170833 | 'Hook2'    | 37.16 | 14.69 | 19.5 | 46.8 | 34.1 | 15.93 | 9.33 | 18.84 | 26.8  | 22.83  |
| 170835 | 'Inpp5j'   | 4.9   | 5.61  | 20.4 | 6.1  | 5.03 | 5.45  | 0.78 | 4.17  | 6.01  | 1.98   |
| 17084  | 'Ly86'     | 3.26  | 11.13 | 1.05 | 11.8 | 12.4 | 69.04 | 5.67 | 9.56  | 2.6   | 2.36   |
| 17087  | 'Ly96'     | 0.09  | 0     | 0    | 0    | 0    | 0     | 0    | 0     | 0.96  | 9.28   |
| 17089  | 'Lyar'     | 6.04  | 11.44 | 4.9  | 29.8 | 8.71 | 15.62 | 18.9 | 17.21 | 18.32 | 18.98  |
| 170930 | 'Sumo2'    | 322.7 | 311.3 | 289  | 431  | 395  | 262.7 | 300  | 321.5 | 219   | 313.79 |
| 170935 | 'Grid2ip'  | 0     | 0.76  | 1.85 | 0    | 0.31 | 0.01  | 0    | 0     | 0     | 0      |
| 170936 | 'Zfp369'   | 0.42  | 0     | 2.04 | 0    | 0.22 | 0     | 0    | 0.18  | 1.61  | 2.1    |
| 170938 | 'Zfp617'   | 16.17 | 13.18 | 11.6 | 8.05 | 11.6 | 9.4   | 15.5 | 21.09 | 5.16  | 7.88   |
| 170947 | 'Myoz3'    | 0.93  | 0.01  | 0.01 | 0.03 | 0.01 | 0.01  | 0    | 0     | 0.02  | 0.01   |
| 17095  | 'Lyl1'     | 0     | 0     | 0.08 | 0    | 4.93 | 6.57  | 0    | 0     | 0     | 0.02   |
| 170952 | 'Prima1'   | 0     | 0.14  | 2.19 | 0    | 2.7  | 6.6   | 0    | 0     | 0     | 0.01   |
| 17096  | 'Lyn'      | 1.31  | 0     | 0.01 | 0    | 0    | 1.29  | 0    | 0     | 2.63  | 4.78   |
| 17101  | 'Lyst'     | 1.2   | 2.2   | 1.79 | 2.41 | 1.23 | 2.26  | 1.84 | 1.47  | 2.18  | 1.21   |
| 17105  | 'Lyz2'     | 0     | 3.61  | 6.44 | 0    | 0    | 8.92  | 0    | 0     | 0     | 6.51   |
| 171095 | 'Il17rc'   | 1.14  | 4.72  | 3.11 | 0    | 0.48 | 5.85  | 0.9  | 1.02  | 0.32  | 1.43   |
| 17110  | 'Lyz1'     | 0     | 0.2   | 0.5  | 0    | 0    | 0.48  | 0    | 0     | 0     | 0.34   |
| 17113  | 'M6pr'     | 85.61 | 90.7  | 91.6 | 82   | 78.6 | 108.4 | 66.7 | 96.93 | 136.3 | 132.64 |
| 17116  | 'Mab2111'  | 0     | 0     | 0.02 | 0    | 28.4 | 25.21 | 0.05 | 7.21  | 4.87  | 3      |
| 171166 | 'Mcoln3'   | 0     | 0     | 0    | 0    | 1.99 | 3.73  | 0    | 0     | 0     | 0      |
| 171167 | 'Fut10'    | 0     | 1.5   | 0.02 | 0    | 5.71 | 3.58  | 4.75 | 3.08  | 2.61  | 0      |
| 171168 | 'Acer1'    | 0.11  | 0.1   | 0.33 | 0.14 | 0.13 | 0.16  | 0.07 | 0.07  | 0.22  | 0.04   |
| 17117  | 'Amacr'    | 33.28 | 9.24  | 27   | 19.8 | 17.5 | 23.55 | 6.36 | 27.53 | 25.76 | 17.3   |
| 171170 | 'Mbnl3'    | 0.29  | 0     | 0.01 | 0    | 0.13 | 0     | 0    | 0     | 0     | 0      |
| 171171 | 'Ntng2'    | 0     | 0     | 0    | 0.2  | 0    | 0     | 0    | 0     | 0     | 0      |
| 17118  | 'Marcks'   | 32.91 | 25.92 | 26.4 | 16   | 24.7 | 16.38 | 23.2 | 15.09 | 13.81 | 24.45  |
| 171180 | 'Sy12'     | 6.93  | 3.98  | 12   | 0.1  | 3.08 | 5.07  | 22.3 | 10.66 | 5.07  | 8.44   |
| 17119  | 'Mxd1'     | 5.29  | 7.34  | 0.87 | 0.3  | 2.95 | 1.67  | 6.86 | 5.05  | 0.64  | 2.29   |
| 17120  | 'Mad111'   | 10.71 | 23.97 | 14.6 | 0.03 | 12.4 | 9.71  | 5.74 | 11.65 | 9.65  | 3.57   |
| 171207 | 'Arhgap4'  | 0     | 0.14  | 0.11 | 0    | 0    | 5.12  | 4.75 | 1.51  | 0.87  | 2.38   |
| 171209 | 'Asic3'    | 0.14  | 0.16  | 1.41 | 0.23 | 2.24 | 0.25  | 0.11 | 0.12  | 0.11  | 0.53   |
| 17121  | 'Mxd3'     | 0     | 0     | 0    | 0    | 5.16 | 0     | 0    | 0     | 0     | 0      |
| 171210 | 'Acot2'    | 2.54  | 13.3  | 5.53 | 6.43 | 12.5 | 8     | 5.02 | 5.25  | 6.52  | 15.37  |
| 171211 | 'Edaradd'  | 0     | 0     | 0.94 | 0    | 0    | 0     | 0    | 0     | 1.41  | 0      |
| 171212 | 'Galnt10'  | 3.32  | 1.46  | 0.1  | 2.89 | 0.89 | 0.35  | 3.05 | 0.84  | 0.27  | 0.87   |
| 17122  | 'Mxd4'     | 2.19  | 2.76  | 2.97 | 0    | 0.04 | 0     | 0    | 2.44  | 10.48 | 4.35   |
| 17123  | 'Madcam1'  | 0     | 0     | 4.67 | 0    | 0.22 | 9.78  | 0    | 0     | 0.29  | 0.49   |

|        |            |       |       |      |      |      |       |      |       |       |        |
|--------|------------|-------|-------|------|------|------|-------|------|-------|-------|--------|
| 17125  | 'Smad1'    | 4.02  | 4.1   | 5.62 | 7.62 | 1.31 | 3.08  | 2.2  | 5.74  | 2.74  | 0.03   |
| 17126  | 'Smad2'    | 2.77  | 4.46  | 3.4  | 3.33 | 1.81 | 2.97  | 3.22 | 5.7   | 5.81  | 6.15   |
| 17127  | 'Smad3'    | 1.68  | 2.13  | 4.09 | 0    | 0.01 | 0.31  | 0    | 0.24  | 2.35  | 0.01   |
| 171270 | 'Vmn1r203' | 0     | 0     | 0.11 | 0    | 0    | 0     | 0    | 0     | 0     | 0      |
| 17128  | 'Smad4'    | 1.54  | 2.15  | 2.5  | 12.5 | 5.07 | 2.12  | 0.38 | 1.5   | 2.53  | 0.88   |
| 171281 | 'Acot3'    | 1.28  | 4.45  | 5.51 | 0.2  | 1.14 | 3.54  | 8.93 | 0.12  | 0.32  | 1.34   |
| 171282 | 'Acot4'    | 1.49  | 0     | 0.29 | 0    | 2.34 | 0.1   | 0    | 0.78  | 2.81  | 0      |
| 171283 | 'Havcr1'   | 0     | 0.08  | 0    | 0    | 0    | 0     | 0    | 0     | 0     | 0      |
| 171285 | 'Havcr2'   | 0     | 0     | 0    | 0    | 0    | 8.3   | 0    | 0     | 4.65  | 0      |
| 171286 | 'Slc12a8'  | 0.1   | 0.28  | 0.2  | 0.4  | 1.91 | 0.22  | 0.05 | 3.92  | 0.15  | 0.18   |
| 17129  | 'Smad5'    | 0.82  | 5.15  | 6.9  | 0.26 | 1.38 | 0.05  | 0    | 0.92  | 6.55  | 1.04   |
| 17130  | 'Smad6'    | 0.59  | 0.17  | 0    | 0    | 0    | 0     | 0    | 0.69  | 0     | 0      |
| 17131  | 'Smad7'    | 1.13  | 2.27  | 2.33 | 3.63 | 0.02 | 0.06  | 2.27 | 0.03  | 0.97  | 0      |
| 17132  | 'Maf'      | 0     | 0     | 0.78 | 0    | 0.53 | 0     | 0.01 | 1.12  | 0     | 0.16   |
| 17133  | 'Maff'     | 0     | 1.19  | 0.03 | 14   | 0.31 | 0.16  | 0    | 0.62  | 0.04  | 0.66   |
| 17134  | 'Mafg'     | 8.55  | 6.36  | 9.67 | 12.2 | 7.98 | 8.09  | 15.3 | 8.35  | 4.94  | 8.52   |
| 17135  | 'Mafk'     | 11.11 | 15.28 | 16.2 | 7.62 | 18.3 | 0.06  | 10.7 | 6.5   | 8.18  | 16.13  |
| 17136  | 'Mag'      | 22.88 | 12.51 | 5.12 | 10.2 | 19.9 | 58.17 | 0.76 | 13.2  | 12.39 | 19.28  |
| 171382 | 'Trpm8'    | 0.02  | 0     | 0    | 0    | 0    | 0     | 0    | 0.05  | 0     | 0      |
| 171388 | 'Bnpl'     | 0.45  | 0     | 0    | 0    | 0    | 0     | 0    | 1.47  | 0     | 0      |
| 171395 | 'Pkd111'   | 0     | 0     | 0.03 | 0    | 0    | 0.41  | 0    | 0     | 0     | 0      |
| 171429 | 'Slc26a6'  | 4.6   | 0.67  | 0    | 3.79 | 2.38 | 5.07  | 2.24 | 0     | 5.41  | 0      |
| 171463 | 'Il17rd'   | 0.57  | 0.16  | 0    | 1.8  | 0    | 0     | 0.01 | 0.01  | 0.3   | 1.27   |
| 171469 | 'Gpr3711'  | 69.69 | 59.47 | 99.1 | 64.6 | 29.5 | 131.5 | 58.1 | 58.03 | 62.23 | 12.49  |
| 171486 | 'Cd99l2'   | 53.95 | 56.55 | 67.4 | 34.6 | 60.9 | 64.25 | 35.7 | 49.15 | 45.7  | 78.64  |
| 17149  | 'Magoh'    | 33.86 | 39.28 | 38.1 | 72.5 | 66.9 | 51.08 | 46.9 | 56.89 | 57.28 | 40.83  |
| 17150  | 'Mfap2'    | 15.9  | 20.87 | 20.9 | 44.8 | 17.7 | 3.68  | 11.6 | 9.08  | 5.75  | 18.03  |
| 171504 | 'Apobr'    | 0     | 0     | 0    | 0    | 0    | 3.12  | 0    | 1.47  | 0     | 0.02   |
| 171508 | 'Creld1'   | 81.16 | 112.8 | 65.8 | 30.5 | 62.5 | 50.93 | 75.6 | 90.86 | 84.55 | 92.02  |
| 17151  | 'Ccndbp1'  | 55.14 | 53.81 | 82.7 | 114  | 41.3 | 77.97 | 58.6 | 71.98 | 68.67 | 70.49  |
| 17152  | 'Mak'      | 0.04  | 5.57  | 2.49 | 2.64 | 0.93 | 0.94  | 0.02 | 1.99  | 0.05  | 0      |
| 17153  | 'Mal'      | 15.92 | 22.19 | 1.94 | 0    | 25.4 | 57.14 | 0.04 | 11.25 | 0.07  | 1.44   |
| 171531 | 'Mlph'     | 0.02  | 0     | 0    | 0.01 | 0.02 | 0.01  | 0.02 | 0.01  | 0     | 0.01   |
| 171543 | 'Bmf'      | 0.01  | 0     | 0    | 0    | 0.01 | 0.03  | 0    | 0     | 0     | 0      |
| 17155  | 'Man1a'    | 1.79  | 0     | 0.78 | 0    | 0    | 1.1   | 0    | 0.82  | 0.11  | 0      |
| 17156  | 'Man1a2'   | 7.63  | 11.39 | 7.48 | 12.8 | 7.4  | 1     | 8.55 | 4.05  | 6.06  | 3.5    |
| 171567 | 'Nme7'     | 2.79  | 5.86  | 6.31 | 0.02 | 14.1 | 5.28  | 10.5 | 15.35 | 12.73 | 9.08   |
| 17158  | 'Man2a1'   | 0     | 0     | 0.05 | 0.83 | 0    | 0.01  | 0    | 0     | 0.34  | 0      |
| 171580 | 'Mical1'   | 4.92  | 0.73  | 0    | 4.17 | 0    | 0     | 0    | 0     | 0     | 0.24   |
| 17159  | 'Man2b1'   | 5.31  | 12.78 | 19.7 | 11.2 | 11.4 | 11.87 | 9.48 | 24.2  | 29.17 | 12.38  |
| 17160  | 'Man2b2'   | 3.6   | 5.24  | 15.7 | 8.3  | 15   | 3.55  | 16.7 | 9.92  | 36.01 | 30.66  |
| 17161  | 'Maoa'     | 10.48 | 17.06 | 11.7 | 1.16 | 9.14 | 2.69  | 8.79 | 18.13 | 10.43 | 7.75   |
| 17164  | 'Mapkapk2' | 0.68  | 1.99  | 0.1  | 6.43 | 1.05 | 0.02  | 8.02 | 0.73  | 0.35  | 0      |
| 17165  | 'Mapkapk5' | 1.59  | 7.69  | 5.05 | 8.81 | 11.3 | 6.93  | 10.1 | 9.77  | 13.2  | 1.6    |
| 17168  | 'Nprl3'    | 23.91 | 30.69 | 21.7 | 6.1  | 23.1 | 14.88 | 25.7 | 21.37 | 23.48 | 37.07  |
| 17169  | 'Mark3'    | 1.78  | 3.05  | 2.14 | 4.08 | 5.04 | 4.38  | 2.86 | 1.83  | 3.33  | 5.53   |
| 17171  | 'Mas1'     | 0.03  | 0.01  | 0.01 | 0.04 | 0.14 | 0.01  | 0    | 0.02  | 0.1   | 0.01   |
| 17172  | 'Ascl1'    | 1.19  | 1.36  | 2.19 | 8.5  | 0    | 0     | 2.23 | 0.02  | 0     | 0.32   |
| 17173  | 'Ascl2'    | 0     | 0.57  | 0    | 0    | 0    | 0     | 0    | 0     | 0     | 0      |
| 17174  | 'Masp1'    | 0.07  | 1.72  | 2.71 | 0    | 0.17 | 0.32  | 4.63 | 0.12  | 3.78  | 0.67   |
| 17175  | 'Masp2'    | 1.37  | 0.02  | 0    | 0    | 0.77 | 0     | 0    | 0     | 0     | 0      |
| 17179  | 'Matk'     | 191.3 | 147.2 | 133  | 126  | 270  | 307.4 | 225  | 187.1 | 142   | 210.35 |
| 17180  | 'Matn1'    | 0     | 0     | 0.48 | 0    | 0    | 0     | 0    | 0     | 0     | 0      |
| 17181  | 'Matn2'    | 2.81  | 7     | 16.2 | 1.47 | 0.39 | 7.71  | 0.49 | 3.95  | 1.15  | 0.16   |
| 17183  | 'Matn4'    | 0.02  | 0     | 18.3 | 2    | 1.5  | 0     | 6.49 | 0.34  | 0     | 0.08   |
| 17184  | 'Matr3'    | 99.4  | 98.52 | 111  | 73.2 | 55.8 | 54.65 | 126  | 82.18 | 99.13 | 112.4  |
| 17187  | 'Max'      | 68.63 | 55.89 | 53   | 33.8 | 43.6 | 48.18 | 62.4 | 90.99 | 85    | 73.64  |
| 17188  | 'Maz'      | 7.5   | 5.64  | 5.44 | 9.42 | 8.81 | 0.69  | 9.44 | 2.96  | 2.61  | 4.26   |



|       |          |       |       |      |      |      |       |      |       |       |        |
|-------|----------|-------|-------|------|------|------|-------|------|-------|-------|--------|
| 17189 | 'Mb'     | 6.88  | 1.12  | 26.4 | 4.1  | 6.58 | 8.17  | 7.08 | 5.6   | 5.86  | 7.29   |
| 17190 | 'Mbd1'   | 11.2  | 5.28  | 8.28 | 8.12 | 17.9 | 10.98 | 11.1 | 5.08  | 13.18 | 7.57   |
| 17191 | 'Mbd2'   | 6.94  | 0.99  | 0    | 2.72 | 0.02 | 0     | 4.4  | 2.15  | 1.84  | 1.85   |
| 17192 | 'Mbd3'   | 16.49 | 13.24 | 11.9 | 50.7 | 25.9 | 13.12 | 27.4 | 29.71 | 31.77 | 15.12  |
| 17193 | 'Mbd4'   | 4.64  | 10.23 | 5.73 | 2.49 | 1.01 | 0.97  | 0.58 | 5.8   | 3.45  | 2.41   |
| 17196 | 'Mbp'    | 431.4 | 211.9 | 150  | 104  | #### | 1136  | 130  | 249.7 | 246.9 | 483.5  |
| 17199 | 'Mc1r'   | 0.4   | 2.7   | 2.1  | 0    | 0.4  | 1.1   | 0.1  | 0.5   | 20.9  | 0.6    |
| 17201 | 'Mc3r'   | 52.9  | 103.4 | 0    | 0    | 0.2  | 0     | 487  | 66.6  | 0     | 0.2    |
| 17202 | 'Mc4r'   | 54.3  | 36.3  | 23.3 | 0    | 0    | 69.9  | 0.2  | 145.2 | 36    | 36.3   |
| 17203 | 'Mc5r'   | 1.5   | 12.5  | 10   | 0    | 0.4  | 0     | 0    | 0     | 5.3   | 0      |
| 17207 | 'Mcf2l'  | 6.15  | 12.38 | 7.02 | 10.4 | 4.94 | 4.96  | 15.8 | 9.7   | 13.32 | 10.95  |
| 17210 | 'Mcl1'   | 5.69  | 7.11  | 2.94 | 22.7 | 2.22 | 4.28  | 1.03 | 3.41  | 4.77  | 4.6    |
| 17215 | 'Mcm3'   | 0     | 2.82  | 0    | 0    | 0    | 0     | 0    | 0     | 4.35  | 0      |
| 17216 | 'Mcm2'   | 0     | 0     | 3.06 | 0    | 0    | 0.01  | 0    | 1.6   | 4.18  | 2.81   |
| 17217 | 'Mcm4'   | 7.09  | 9.78  | 10   | 11.7 | 1.33 | 0.76  | 8.29 | 4.24  | 4.85  | 5.27   |
| 17218 | 'Mcm5'   | 0     | 0.03  | 3.55 | 0.02 | 0.45 | 0.04  | 0    | 0.58  | 0     | 0.02   |
| 17219 | 'Mcm6'   | 7.14  | 12.28 | 5.62 | 4.58 | 6.71 | 15.13 | 18.8 | 12    | 7.37  | 12.84  |
| 17220 | 'Mcm7'   | 5.58  | 4.43  | 4.72 | 8.45 | 14.7 | 11.31 | 13.3 | 12.11 | 2.7   | 1.65   |
| 17221 | 'Cd46'   | 1.28  | 0.73  | 1.58 | 1.57 | 0.6  | 0.65  | 0.52 | 0.65  | 1.07  | 2.29   |
| 17222 | 'Anapc1' | 2.79  | 2.1   | 9.3  | 2.31 | 5.06 | 4.25  | 2.52 | 1.42  | 3.44  | 0.93   |
| 17229 | 'Tpsb2'  | 0     | 0     | 0.68 | 0    | 0    | 0     | 0    | 0     | 0     | 0      |
| 17237 | 'Mgrn1'  | 52.77 | 43.48 | 73.1 | 50.1 | 55.3 | 42.58 | 79.1 | 73.04 | 88.11 | 82.21  |
| 17242 | 'Mdk'    | 28.71 | 13.81 | 12.7 | 27   | 9.29 | 29.13 | 30.7 | 15.1  | 19.73 | 6      |
| 17245 | 'Mdm1'   | 6.7   | 3.17  | 2.94 | 4.05 | 13.5 | 3.17  | 2.88 | 2.26  | 0.55  | 4.15   |
| 17246 | 'Mdm2'   | 9.8   | 12.26 | 13.9 | 33.2 | 20.1 | 7.52  | 10.3 | 13.83 | 5.43  | 15.18  |
| 17248 | 'Mdm4'   | 8.92  | 5.33  | 2.76 | 7.57 | 4.39 | 11.23 | 6.92 | 3.07  | 3.76  | 7.75   |
| 17250 | 'Abcc1'  | 7.17  | 1.08  | 0.16 | 5.46 | 1.21 | 2.44  | 0    | 7.55  | 2.41  | 2.8    |
| 17252 | 'Rdh11'  | 14.19 | 14.65 | 18.6 | 27.5 | 5.75 | 20.9  | 0.03 | 21.45 | 1.41  | 10.22  |
| 17254 | 'Slc3a2' | 55.27 | 92.18 | 84.8 | 99.9 | 60   | 116   | 45.7 | 55.23 | 64.72 | 75.48  |
| 17256 | 'Mea1'   | 318.7 | 231.2 | 267  | 266  | 274  | 340.7 | 199  | 251.4 | 199.6 | 209.49 |
| 17257 | 'Mecp2'  | 1.57  | 1.64  | 1.77 | 0.14 | 3.01 | 1.54  | 1.36 | 2.48  | 1.93  | 1.4    |
| 17258 | 'Mef2a'  | 3.22  | 3.77  | 5.61 | 10.7 | 5.89 | 2.27  | 2.34 | 2.04  | 5.21  | 0.19   |
| 17259 | 'Mef2b'  | 0     | 0     | 0    | 0    | 0    | 0     | 0    | 1.54  | 0     | 0      |
| 17260 | 'Mef2c'  | 12.37 | 10.75 | 2.74 | 14.4 | 19.7 | 18.09 | 7.42 | 5.34  | 21.84 | 6.2    |
| 17261 | 'Mef2d'  | 13.51 | 10.01 | 12.1 | 12.2 | 12.5 | 5.79  | 3.89 | 4.32  | 10.38 | 6.56   |
| 17268 | 'Meis1'  | 2.1   | 0.41  | 0.03 | 0.07 | 16.5 | 0     | 0.05 | 0     | 2.39  | 0      |
| 17274 | 'Rab8a'  | 58.56 | 62.29 | 53.5 | 58.9 | 43.3 | 55.39 | 43.2 | 65.19 | 62.3  | 75.54  |
| 17281 | 'Fyco1'  | 2.58  | 0.57  | 4.75 | 1.01 | 2.7  | 5.63  | 0.81 | 1.31  | 2.03  | 3.32   |
| 17283 | 'Men1'   | 35.53 | 17.85 | 22.4 | 28.6 | 33.2 | 36.85 | 33.8 | 28.4  | 36.3  | 30.59  |
| 17285 | 'Meox1'  | 1.69  | 3.61  | 0    | 13   | 0    | 0     | 0.02 | 2.07  | 0     | 6.82   |
| 17286 | 'Meox2'  | 5.59  | 0     | 0    | 0    | 0    | 0     | 0    | 0     | 0     | 0      |
| 17288 | 'Mep1b'  | 0     | 0     | 0    | 0    | 0    | 0     | 0    | 0     | 0     | 1.8    |
| 17289 | 'Mertk'  | 0     | 0.03  | 0    | 2.01 | 0.92 | 1.68  | 0.01 | 2.39  | 0.19  | 0      |
| 17293 | 'Mesp2'  | 0     | 0     | 0    | 0    | 0    | 1.51  | 0    | 0     | 4.02  | 0      |
| 17294 | 'Mest'   | 86.76 | 113.5 | 112  | 83.4 | 136  | 97.62 | 92.6 | 85.65 | 101.2 | 122.2  |
| 17295 | 'Met'    | 0     | 0     | 0    | 0    | 0.01 | 0     | 0    | 0     | 0     | 0.17   |
| 17299 | 'Mettl1' | 41.67 | 28.73 | 20.1 | 17.1 | 37.3 | 14.25 | 12.2 | 38.47 | 40.88 | 30.81  |
| 17300 | 'Foxc1'  | 0     | 0     | 0    | 0    | 0    | 0     | 0    | 0     | 0.05  | 0      |
| 17301 | 'Foxd2'  | 0     | 0     | 0    | 0    | 0    | 0     | 0    | 0.02  | 0     | 0      |
| 17304 | 'Mfge8'  | 48.73 | 56.54 | 15.5 | 9.63 | 17.1 | 48.23 | 21.2 | 21.23 | 29.05 | 56.16  |
| 17305 | 'Mfng'   | 4.56  | 1.31  | 6.95 | 15.2 | 0    | 7.67  | 0    | 0     | 0     | 24.59  |
| 17306 | 'Sypl2'  | 0     | 0     | 0    | 0    | 0    | 0     | 0    | 0     | 0     | 0.16   |
| 17308 | 'Mgat1'  | 2.94  | 2.91  | 0.7  | 25.5 | 8.97 | 9.21  | 15.7 | 4.91  | 12.64 | 3.55   |
| 17309 | 'Mgat3'  | 3.97  | 5.56  | 5.58 | 10.3 | 7.69 | 1.59  | 5.46 | 4.49  | 3.64  | 2.25   |
| 17311 | 'Kitl'   | 0.75  | 0     | 0.01 | 0    | 0.43 | 0.59  | 3.31 | 0.23  | 0     | 0.29   |
| 17313 | 'Mgp'    | 0     | 0     | 0    | 6.04 | 0.8  | 0     | 0    | 2.48  | 13.29 | 0      |
| 17314 | 'Mgmt'   | 4.72  | 0.07  | 0.07 | 0.84 | 0    | 0     | 12.3 | 0     | 3.55  | 0.06   |
| 17318 | 'Mid1'   | 2.32  | 2.97  | 1.86 | 1.95 | 1.63 | 0.02  | 1.23 | 1.06  | 3.57  | 2.04   |

|       |            |       |       |      |      |      |       |      |       |       |        |
|-------|------------|-------|-------|------|------|------|-------|------|-------|-------|--------|
| 17319 | 'Mif'      | 935.8 | 976.4 | 1408 | 1418 | 744  | 1242  | 1004 | 991.8 | 895.1 | 979.75 |
| 17329 | 'Cxcl9'    | 0     | 0     | 0    | 0.02 | 0    | 0     | 0    | 0     | 0     | 0      |
| 17330 | 'Minpp1'   | 53.63 | 44.12 | 58.4 | 33.6 | 28   | 36.82 | 54.2 | 27.09 | 55.44 | 23.93  |
| 17341 | 'Bhlha15'  | 0     | 0.03  | 0    | 5.66 | 0    | 0.01  | 0    | 0     | 0     | 0      |
| 17342 | 'Mitf'     | 0.78  | 0.69  | 0.33 | 2.4  | 0.2  | 2.98  | 0    | 0     | 0     | 0.02   |
| 17344 | 'Pias2'    | 6.15  | 8.02  | 3.94 | 11.7 | 13.7 | 5.12  | 6.44 | 4.34  | 14.1  | 5.51   |
| 17345 | 'Mki67'    | 0     | 0.02  | 0.01 | 0.01 | 0.01 | 0     | 0.3  | 0     | 0.03  | 0.01   |
| 17346 | 'Mknk1'    | 6.96  | 6.4   | 3.04 | 10.6 | 11.7 | 5.37  | 4.63 | 7.24  | 9.4   | 6.27   |
| 17347 | 'Mknk2'    | 0.59  | 0.63  | 1.94 | 0.29 | 3.08 | 0.01  | 0.03 | 1.85  | 1.68  | 1.11   |
| 17349 | 'Mlf1'     | 0.2   | 3.58  | 5.26 | 91.6 | 3.4  | 6.25  | 0.75 | 0.07  | 0.04  | 5.13   |
| 17350 | 'Mlh1'     | 14.37 | 11.03 | 9.16 | 0    | 15.4 | 11.78 | 5.27 | 6     | 12.96 | 11.3   |
| 17354 | 'Milt10'   | 5.78  | 6.75  | 6.09 | 8.2  | 8.16 | 2.88  | 5.09 | 2.69  | 8.61  | 6.84   |
| 17355 | 'Aff1'     | 0.24  | 0.55  | 0.47 | 0.51 | 0    | 0.33  | 0    | 0.44  | 0.43  | 0.03   |
| 17356 | 'Afdn'     | 4.72  | 3.16  | 3.64 | 5.36 | 4.96 | 1.64  | 2.99 | 0.92  | 4.19  | 2.29   |
| 17357 | 'Marcksl1' | 129.2 | 71.66 | 54.9 | 223  | 75.7 | 24.05 | 48.6 | 72.68 | 77.68 | 43.48  |
| 17380 | 'Mme'      | 0.11  | 0.01  | 0    | 0    | 1.47 | 0     | 1.29 | 0.1   | 0.84  | 0      |
| 17385 | 'Mmp11'    | 0.02  | 1.3   | 2.16 | 0.09 | 3.55 | 5.28  | 0.03 | 4.14  | 0     | 1.36   |
| 17387 | 'Mmp14'    | 2.77  | 1.11  | 2.81 | 1.86 | 1.7  | 0.2   | 0    | 1.68  | 2.04  | 0      |
| 17388 | 'Mmp15'    | 1.01  | 1.08  | 2.34 | 0    | 4.38 | 0.03  | 2.13 | 0.16  | 2.18  | 0.4    |
| 17389 | 'Mmp16'    | 4.5   | 2.12  | 3.93 | 1.13 | 8.4  | 5.64  | 8.53 | 4.51  | 5.89  | 3.75   |
| 17390 | 'Mmp2'     | 2.98  | 1.64  | 11.3 | 4.07 | 0    | 0     | 7.18 | 0     | 1.26  | 0.01   |
| 17391 | 'Mmp24'    | 22    | 15.86 | 13.1 | 7.63 | 12.5 | 25.12 | 21   | 18.34 | 24.43 | 16.97  |
| 17392 | 'Mmp3'     | 0     | 0     | 0    | 0    | 0.03 | 0     | 0    | 0     | 0     | 0      |
| 17394 | 'Mmp8'     | 0     | 0     | 0    | 0    | 0    | 0.06  | 0    | 0     | 0     | 0      |
| 17395 | 'Mmp9'     | 0     | 0.01  | 0    | 0    | 0.91 | 0     | 0.02 | 0     | 0     | 0.01   |
| 17420 | 'Mnat1'    | 18.52 | 28.49 | 28.7 | 18.6 | 10.8 | 34.46 | 10   | 11.41 | 8.92  | 20.3   |
| 17423 | 'Ndst2'    | 1.18  | 3.55  | 0.27 | 0.22 | 0.69 | 1.37  | 1.62 | 0.56  | 3.22  | 2.07   |
| 17425 | 'Foxk1'    | 0     | 0     | 1.18 | 0    | 0.63 | 0.39  | 0.63 | 0.02  | 0.01  | 0      |
| 17427 | 'Mns1'     | 0.43  | 0     | 0.13 | 4    | 0.2  | 3.83  | 0.79 | 0.77  | 0     | 0.18   |
| 17428 | 'Mnt'      | 1.09  | 0.85  | 0.57 | 8.32 | 2.83 | 0.03  | 2.21 | 1.11  | 3.98  | 1.06   |
| 17433 | 'Mobp'     | 101.8 | 51.9  | 6.67 | 8.32 | 3102 | 175.7 | 48.4 | 51.3  | 29.72 | 68.78  |
| 17434 | 'Mocs2'    | 40.23 | 41.86 | 44.7 | 48.3 | 38.9 | 65.41 | 25.4 | 39.43 | 61.72 | 37.94  |
| 17436 | 'Me1'      | 15.72 | 9.71  | 15   | 13.8 | 23.7 | 9.87  | 10.8 | 13.56 | 14.38 | 7.71   |
| 17441 | 'Mog'      | 21.14 | 19.67 | 0    | 0    | 18   | 84.91 | 0.05 | 15.19 | 0     | 0.6    |
| 17444 | 'Grap2'    | 0     | 0     | 0    | 0    | 0    | 0.49  | 0    | 0     | 0     | 0      |
| 17448 | 'Mdh2'     | 707.1 | 570.2 | 806  | 765  | 845  | 1083  | 843  | 1087  | 847.4 | 804.8  |
| 17449 | 'Mdh1'     | 756.9 | 673.5 | 1066 | 711  | 820  | 1153  | 1000 | 1062  | 847.3 | 795.35 |
| 17454 | 'Mov10'    | 8.85  | 10.34 | 7.94 | 0    | 12.1 | 1.9   | 3.45 | 6.76  | 5.91  | 4.97   |
| 17463 | 'Psmc7'    | 170.3 | 140.2 | 156  | 152  | 135  | 142.2 | 106  | 188.3 | 119.7 | 131.55 |
| 17470 | 'Cd200'    | 285.5 | 392.9 | 266  | 205  | 241  | 239.6 | 213  | 367.4 | 343.6 | 318.46 |
| 17475 | 'Mpdz'     | 0.41  | 0.66  | 1.52 | 6.43 | 0.5  | 4.65  | 3.16 | 0.33  | 0.97  | 2.5    |
| 17476 | 'Mpeg1'    | 1.55  | 0     | 0    | 0    | 1.91 | 4.9   | 0    | 0     | 0     | 0      |
| 17480 | 'Mpl'      | 0     | 0     | 0    | 0    | 0    | 0.19  | 0.02 | 0     | 0     | 0      |
| 17523 | 'Mpo'      | 0     | 0.02  | 0.49 | 0    | 0    | 0     | 0    | 1.11  | 0     | 0      |
| 17524 | 'Mpp1'     | 31.68 | 44.89 | 42.6 | 57.7 | 33.2 | 36.54 | 21.1 | 47.72 | 32.51 | 36.79  |
| 17527 | 'Mpv17'    | 48.28 | 85.42 | 52.8 | 66.3 | 65.7 | 107.6 | 78.5 | 110.3 | 110.5 | 97.87  |
| 17532 | 'Mras'     | 8.92  | 8.89  | 11.6 | 1.39 | 8.27 | 2.12  | 10.1 | 5.96  | 7.34  | 6.88   |
| 17534 | 'Mrc2'     | 0     | 0.2   | 0    | 0.25 | 0    | 0     | 0    | 0     | 0     | 0      |
| 17535 | 'Mre11a'   | 1.77  | 1.67  | 0.12 | 1.99 | 0.92 | 1.38  | 1.06 | 1.39  | 0.23  | 3.02   |
| 17536 | 'Meis2'    | 0.2   | 0     | 0    | 0    | 6.19 | 3.45  | 0    | 3.19  | 0.26  | 0      |
| 17537 | 'Meis3'    | 25.65 | 17.63 | 39.7 | 37   | 20.7 | 25.28 | 29.9 | 29.34 | 30.48 | 26.42  |
| 17540 | 'Mrvi1'    | 0     | 0     | 0    | 0    | 0    | 0.35  | 0    | 0     | 0     | 0      |
| 17681 | 'Msc'      | 0     | 0.08  | 1.04 | 0    | 0    | 0     | 0    | 0     | 3.69  | 1.4    |
| 17684 | 'Cited2'   | 4.17  | 6.33  | 2.18 | 4.82 | 3.23 | 3.07  | 21.5 | 1.49  | 12.18 | 3.04   |
| 17685 | 'Msh2'     | 171.8 | 224.6 | 256  | 0    | 184  | 175.8 | 90.7 | 327.8 | 292.4 | 278.4  |
| 17686 | 'Msh3'     | 57.6  | 75.4  | 82.6 | 0    | 19.8 | 2.6   | 63.8 | 23.9  | 69.3  | 38.5   |
| 17687 | 'Msh5'     | 0     | 0     | 0.06 | 0    | 0    | 0     | 0    | 0     | 0     | 0.09   |
| 17688 | 'Msh6'     | 65.4  | 21.2  | 22.9 | 0    | 12.7 | 1.9   | 35.1 | 12.8  | 18.3  | 66.8   |

|       |            |       |       |      |      |      |       |      |       |       |        |
|-------|------------|-------|-------|------|------|------|-------|------|-------|-------|--------|
| 17690 | 'Msi1'     | 1.47  | 0.69  | 4.31 | 3.08 | 2.3  | 0.2   | 1.32 | 0.5   | 1.34  | 0.76   |
| 17691 | 'Sik1'     | 0.88  | 3.89  | 3.27 | 7.02 | 0.19 | 2.16  | 2.26 | 0     | 1.02  | 0.89   |
| 17692 | 'Msl3'     | 2.1   | 5.15  | 3.26 | 7.49 | 2.18 | 5.23  | 0.02 | 0.81  | 0.45  | 3.54   |
| 17698 | 'Msn'      | 1.15  | 0     | 2.49 | 0    | 2.1  | 2.68  | 5.67 | 1.07  | 2.05  | 1.92   |
| 17701 | 'Msx1'     | 0     | 0     | 0    | 0    | 0.08 | 0     | 0    | 0     | 0     | 0      |
| 17702 | 'Msx2'     | 0     | 0     | 0    | 0    | 0.07 | 0     | 0    | 0     | 0     | 0      |
| 17713 | 'Grpel1'   | 35.71 | 31.74 | 55   | 41   | 39.2 | 36.92 | 48.9 | 47.28 | 37.16 | 28.31  |
| 17714 | 'Grpel2'   | 13.4  | 13.28 | 4.59 | 13.2 | 8.32 | 18.21 | 5.91 | 12.09 | 11.76 | 5.2    |
| 17748 | 'Mt1'      | 136.8 | 161.1 | 267  | 297  | 96.7 | 281.4 | 176  | 107.8 | 140   | 68.24  |
| 17749 | 'Polr2k'   | 74.26 | 144.3 | 94   | 160  | 110  | 85.97 | 88.9 | 67.24 | 114.9 | 130.36 |
| 17750 | 'Mt2'      | 30.97 | 45.47 | 86.7 | 78.8 | 36.9 | 96.16 | 62.7 | 27.03 | 5.39  | 8.99   |
| 17751 | 'Mt3'      | 348.5 | 470.6 | 531  | 415  | 501  | 968.4 | 495  | 303.5 | 389.6 | 349    |
| 17754 | 'Map1a'    | 5.23  | 5.5   | 12.8 | 11.3 | 15.1 | 10.63 | 8.56 | 6.39  | 5.57  | 9.57   |
| 17755 | 'Map1b'    | 144.5 | 159.5 | 139  | 149  | 155  | 161.3 | 103  | 187.5 | 126.2 | 156.49 |
| 17756 | 'Map2'     | 17.88 | 18.09 | 12.8 | 17.8 | 12.2 | 10.64 | 12.9 | 10.29 | 14.41 | 17.53  |
| 17758 | 'Map4'     | 77.12 | 67.29 | 74.5 | 61.4 | 98.3 | 41.52 | 64.5 | 84.72 | 84.52 | 77.88  |
| 17760 | 'Map6'     | 60.23 | 47.14 | 66.1 | 30.5 | 50.3 | 31.61 | 47.8 | 37.94 | 34.66 | 33.57  |
| 17761 | 'Map7'     | 11.33 | 11.39 | 2.65 | 20.5 | 10.7 | 7.24  | 13.3 | 5.52  | 2.43  | 11.06  |
| 17762 | 'Mapt'     | 109.6 | 91.51 | 110  | 53.5 | 95   | 113.8 | 82   | 109.6 | 84.5  | 77.96  |
| 17763 | 'Mtcp1'    | 3.13  | 2.52  | 0.04 | 0    | 0    | 0     | 0    | 3.99  | 3.49  | 0      |
| 17764 | 'Mtf1'     | 2.11  | 3.06  | 1.1  | 7.42 | 2.19 | 2.59  | 2.25 | 1.33  | 0.95  | 2.08   |
| 17765 | 'Mtf2'     | 23.79 | 9.78  | 11.9 | 33.1 | 28.6 | 26.15 | 21.8 | 19.83 | 30.38 | 23.35  |
| 17766 | 'Nudt1'    | 10.93 | 9.52  | 4.18 | 0.06 | 8.75 | 37.4  | 0    | 6.42  | 7.4   | 8.83   |
| 17768 | 'Mthfd2'   | 11.07 | 24.09 | 13.2 | 2.8  | 15   | 18.75 | 20.5 | 16.87 | 3.4   | 28.9   |
| 17769 | 'Mthfr'    | 0.01  | 3.4   | 7.1  | 0    | 2.25 | 2.2   | 6.43 | 1.41  | 4.61  | 2.72   |
| 17771 | 'Tesmin'   | 0.04  | 0     | 0.02 | 0    | 0.37 | 0.02  | 0    | 0.93  | 0     | 0      |
| 17772 | 'Mtm1'     | 1.08  | 0.61  | 2.91 | 4.93 | 1.79 | 2.01  | 5.58 | 1.1   | 9.9   | 3.09   |
| 17773 | 'Mtnr1a'   | 0     | 0     | 0    | 0    | 0    | 0     | 0    | 2.2   | 0     | 0      |
| 17775 | 'Laptm4a'  | 169.8 | 157.9 | 94.3 | 145  | 112  | 161.4 | 125  | 122.6 | 170.1 | 169.84 |
| 17776 | 'Mast2'    | 8.33  | 7.7   | 3.98 | 4.46 | 0.55 | 6.42  | 18.1 | 6.23  | 7.13  | 3.42   |
| 17777 | 'Mttp'     | 4.61  | 1.6   | 11.4 | 6.91 | 2.35 | 0.29  | 9.01 | 4.28  | 5.96  | 10.01  |
| 17826 | 'Fam89b'   | 28.46 | 31.15 | 23.3 | 36.8 | 20.8 | 17.34 | 38.3 | 33.62 | 19.59 | 28.47  |
| 17827 | 'Mtx1'     | 23.67 | 27.38 | 39.6 | 60.1 | 37.6 | 68.06 | 45.1 | 38.41 | 35.07 | 28.43  |
| 17828 | 'Bloc1s5'  | 44.33 | 21.23 | 28.3 | 10.4 | 18.1 | 19.82 | 6.32 | 29.82 | 35.73 | 9.31   |
| 17829 | 'Muc1'     | 0     | 0     | 0.17 | 1.39 | 0    | 0     | 0    | 0.07  | 0.38  | 0.09   |
| 17831 | 'Muc2'     | 0     | 0     | 0    | 0    | 0    | 0     | 0    | 0     | 0     | 0.57   |
| 17833 | 'Muc5ac'   | 0     | 0     | 0.01 | 0    | 0    | 0     | 0    | 0     | 0     | 0      |
| 17837 | 'Mug2'     | 0     | 0     | 0.02 | 0    | 0    | 0     | 0    | 0     | 0     | 0      |
| 17841 | 'Mup2'     | 0     | 0     | 0    | 0    | 0    | 0     | 0    | 1.14  | 0     | 0      |
| 17843 | 'Mup4'     | 0     | 0     | 0    | 0    | 0    | 0     | 0    | 0.1   | 0     | 0      |
| 17844 | 'Mup5'     | 0     | 0     | 0    | 0    | 0    | 0     | 0    | 0.1   | 0     | 0      |
| 17846 | 'Commd1'   | 79.98 | 85.02 | 28.5 | 113  | 121  | 118.1 | 110  | 83.34 | 62.01 | 84.06  |
| 17847 | 'Usp34'    | 4.37  | 3.64  | 6.9  | 10.5 | 1.62 | 3.24  | 5.66 | 3.11  | 7.68  | 4.68   |
| 17850 | 'Mut'      | 9.09  | 10.05 | 13.5 | 0.48 | 4.89 | 5.4   | 12.6 | 4.87  | 10.29 | 9.68   |
| 17855 | 'Mvk'      | 26.51 | 17.87 | 15   | 19.5 | 16.9 | 18.98 | 11.6 | 11.79 | 11.13 | 10.37  |
| 17859 | 'Mxi1'     | 4.73  | 4.9   | 3.3  | 7.98 | 7.37 | 12    | 12.7 | 2.88  | 7.43  | 3.22   |
| 17863 | 'Myb'      | 3.31  | 0.03  | 0    | 0    | 0    | 0     | 0    | 0.95  | 0     | 0.09   |
| 17864 | 'Mybl1'    | 0.01  | 0.07  | 0.22 | 0    | 1.05 | 0.01  | 0.21 | 0.04  | 0.31  | 1.11   |
| 17865 | 'Mybl2'    | 0.65  | 0     | 0    | 0    | 0.01 | 0     | 0    | 0.06  | 0     | 0.02   |
| 17868 | 'Mybpc3'   | 0.12  | 0     | 0.39 | 0.6  | 0.05 | 0.11  | 0.04 | 0.04  | 0.12  | 0.13   |
| 17869 | 'Myc'      | 0.51  | 13.95 | 4.51 | 34.9 | 0.04 | 0     | 19.6 | 3.69  | 2.6   | 2.48   |
| 17872 | 'Ppp1r15a' | 35.39 | 100.8 | 64.4 | 239  | 27.9 | 72.49 | 61.9 | 19.98 | 21.26 | 86.89  |
| 17873 | 'Gadd45b'  | 1.64  | 25.65 | 9.89 | 9.12 | 4.92 | 3.73  | 6.78 | 4.76  | 4.61  | 3.76   |
| 17874 | 'Myd88'    | 2.16  | 3.44  | 3.27 | 6.87 | 2.72 | 11.13 | 4.64 | 2.28  | 0.5   | 3.88   |
| 17876 | 'Myef2'    | 44.77 | 45.27 | 34.6 | 34.4 | 36.7 | 34.79 | 27   | 41.44 | 53.86 | 28.38  |
| 17880 | 'Myh11'    | 0     | 0.67  | 0    | 0    | 0    | 0     | 0    | 0     | 0     | 0      |
| 17882 | 'Myh2'     | 0     | 0     | 1.01 | 5.32 | 0    | 0     | 0    | 0     | 0     | 0      |
| 17883 | 'Myh3'     | 0     | 0     | 0    | 0.1  | 0    | 0     | 0    | 0     | 0     | 0.59   |

|       |            |       |       |      |      |      |       |      |       |       |         |
|-------|------------|-------|-------|------|------|------|-------|------|-------|-------|---------|
| 17884 | 'Myh4'     | 0     | 0     | 0.66 | 1.45 | 0    | 0     | 0    | 0.2   | 0     | 0       |
| 17885 | 'Myh8'     | 0     | 0.03  | 0    | 0    | 0    | 0     | 0    | 0.24  | 0     | 0       |
| 17886 | 'Myh9'     | 0.24  | 0.16  | 0.58 | 0.01 | 1.35 | 0     | 0.02 | 1.62  | 0.81  | 0.78    |
| 17888 | 'Myh6'     | 0.62  | 0.08  | 1.93 | 0.45 | 0.4  | 0.55  | 0.37 | 0.17  | 0.5   | 0.49    |
| 17896 | 'Myl4'     | 5.56  | 11.75 | 0.06 | 0    | 10.3 | 6.66  | 24   | 5.65  | 9.48  | 0.2     |
| 17897 | 'Myl3'     | 4.37  | 0.73  | 14.9 | 3.33 | 3.37 | 4.92  | 3.67 | 1.87  | 3.56  | 4.63    |
| 17898 | 'Myl7'     | 0.08  | 1.86  | 0.27 | 8.16 | 0.09 | 0     | 0    | 0     | 2.16  | 0       |
| 17901 | 'Myl1'     | 0.06  | 0.07  | 0.25 | 0.66 | 0.39 | 0.17  | 0    | 0     | 0.06  | 0.11    |
| 17904 | 'Myl6'     | 681.7 | 559.6 | 724  | 678  | 882  | 824.3 | 680  | 684.3 | 669   | 603.05  |
| 17906 | 'Myl2'     | 8.13  | 1.14  | 29.6 | 6.52 | 6.25 | 12.61 | 8.34 | 3.59  | 8.41  | 12.83   |
| 17907 | 'Mylpf'    | 0     | 0     | 0.15 | 0    | 0    | 0     | 0.62 | 0     | 0     | 0       |
| 17909 | 'Myo10'    | 6.32  | 6.61  | 7.63 | 10.1 | 2.33 | 1.17  | 2.8  | 3.63  | 2.78  | 5.57    |
| 17910 | 'Myo15'    | 0.27  | 0.17  | 1.03 | 0    | 0    | 0     | 0    | 0     | 0     | 0       |
| 17912 | 'Myo1b'    | 2.77  | 3.23  | 1.54 | 2.06 | 4.98 | 0.1   | 0.11 | 0.88  | 0.21  | 1.99    |
| 17913 | 'Myo1c'    | 0.01  | 0.12  | 4.97 | 2.82 | 1.07 | 1.52  | 5.7  | 2.86  | 2.52  | 5.93    |
| 17916 | 'Myo1f'    | 0     | 0     | 0    | 0    | 0    | 3.36  | 0    | 0     | 0     | 0       |
| 17918 | 'Myo5a'    | 7.8   | 7.25  | 14   | 9.96 | 5.48 | 7.12  | 10.9 | 6     | 6.99  | 5.55    |
| 17919 | 'Myo5b'    | 0.58  | 0     | 2.73 | 1.8  | 0.01 | 0.01  | 1.84 | 0.35  | 0     | 0       |
| 17920 | 'Myo6'     | 6.45  | 8.92  | 2.35 | 9.09 | 6.47 | 8.67  | 4.66 | 1.47  | 3.44  | 6.98    |
| 17921 | 'Myo7a'    | 0.28  | 3.67  | 0.96 | 1.59 | 1.84 | 0.76  | 1.62 | 0.41  | 0.94  | 1.29    |
| 17922 | 'Myo7b'    | 0     | 0     | 0    | 0.05 | 0    | 0     | 0    | 0     | 0     | 0       |
| 17925 | 'Myo9b'    | 4.93  | 2.44  | 0.76 | 8.2  | 7.25 | 1.09  | 5.81 | 2.9   | 7.18  | 4.26    |
| 17926 | 'Myoc'     | 2.8   | 0     | 0    | 0    | 0    | 0     | 0    | 0     | 0     | 0       |
| 17927 | 'Myod1'    | 0     | 1.87  | 0    | 0    | 0    | 0     | 0    | 0     | 0     | 0       |
| 17929 | 'Myom1'    | 0.01  | 0.01  | 0.22 | 0.04 | 0.01 | 1.6   | 0.01 | 0     | 0.01  | 0.05    |
| 17930 | 'Myom2'    | 0.02  | 0     | 1.22 | 6.04 | 0    | 0.06  | 0.02 | 3.06  | 0.03  | 0.03    |
| 17931 | 'Ppp1r12a' | 15.14 | 14.45 | 5.79 | 19.9 | 19   | 15.37 | 17.3 | 20.17 | 17.98 | 21.87   |
| 17932 | 'Myt1'     | 0.13  | 1.33  | 3.76 | 3.61 | 1.03 | 1.22  | 2.41 | 0.86  | 0.26  | 4.26    |
| 17933 | 'Myt1l'    | 37.78 | 43.35 | 30.8 | 24.4 | 35.4 | 30.32 | 28.4 | 37.06 | 19.55 | 25.17   |
| 17936 | 'Nab1'     | 2.18  | 1.67  | 0.35 | 0    | 1.54 | 2.81  | 0.11 | 3.78  | 3.53  | 0.16    |
| 17937 | 'Nab2'     | 0.61  | 1.21  | 1.69 | 3.33 | 8.54 | 0.1   | 0.02 | 0.03  | 0.07  | 0       |
| 17938 | 'Naca'     | 298.9 | 298.1 | 257  | 307  | 260  | 364.8 | 396  | 303.1 | 239.5 | 250.57  |
| 17939 | 'Naga'     | 7.96  | 28.68 | 23.9 | 7.73 | 21.4 | 37.68 | 23.4 | 27.41 | 66.12 | 52.08   |
| 17948 | 'Naip2'    | 0.01  | 0.05  | 0.1  | 0.16 | 0.06 | 1.46  | 0    | 0.29  | 0.05  | 0       |
| 17951 | 'Naip5'    | 0.42  | 2.85  | 1.33 | 2.16 | 1.53 | 0.99  | 2.08 | 0.54  | 1.63  | 0.64    |
| 17954 | 'Nap1l2'   | 55.53 | 88.8  | 97.6 | 47.9 | 56.1 | 48.41 | 96   | 82    | 52.18 | 44.93   |
| 17955 | 'Nap1l4'   | 141.2 | 152.9 | 133  | 200  | 138  | 165.6 | 157  | 122.7 | 134.1 | 126.48  |
| 17957 | 'Napb'     | 120.9 | 144   | 179  | 189  | 95.7 | 52.05 | 190  | 172   | 109.7 | 90.42   |
| 17960 | 'Nat1'     | 0     | 0.91  | 0    | 0    | 0    | 0     | 0    | 0     | 0     | 1.97    |
| 17961 | 'Nat2'     | 0     | 0     | 0    | 0    | 0.03 | 0     | 0    | 0     | 0.1   | 0       |
| 17965 | 'Nbl1'     | 0.05  | 2.08  | 0.06 | 0    | 20.7 | 0     | 3.09 | 2.12  | 0.02  | 0.15    |
| 17966 | 'Nbr1'     | 16.08 | 13.26 | 25.2 | 8.32 | 9.43 | 5.27  | 19.5 | 16.33 | 19.64 | 23.74   |
| 17967 | 'Ncam1'    | 137.5 | 165   | 129  | 100  | 96.8 | 55.11 | 136  | 154.5 | 144.4 | 154.54  |
| 17968 | 'Ncam2'    | 4.77  | 4.48  | 3.86 | 1.9  | 2.21 | 2.49  | 6.68 | 6.3   | 2.15  | 0.8     |
| 17969 | 'Ncf1'     | 0     | 0.05  | 0.05 | 0.04 | 0.25 | 7.55  | 0.07 | 1.52  | 0.02  | 0.02    |
| 17970 | 'Ncf2'     | 0.02  | 0     | 2.72 | 0    | 0    | 2.41  | 0    | 0.05  | 0     | 0.01    |
| 17972 | 'Ncf4'     | 0     | 1.32  | 0    | 0    | 0    | 1.69  | 0    | 0     | 0     | 0       |
| 17973 | 'Nck1'     | 21.5  | 18.69 | 13.9 | 6.5  | 12.3 | 24.86 | 10.3 | 18.69 | 8.58  | 3.39    |
| 17974 | 'Nck2'     | 0.83  | 0.22  | 0.53 | 3.75 | 6.76 | 0.16  | 1.32 | 3.05  | 3.91  | 4.9     |
| 17975 | 'Ncl'      | 28.96 | 25.43 | 29.9 | 51.1 | 31.1 | 30.02 | 25.1 | 33.35 | 33.52 | 24.94   |
| 17977 | 'Ncoa1'    | 7.83  | 6.33  | 5.96 | 6.9  | 4.34 | 4.44  | 3.21 | 3.82  | 5.19  | 4.3     |
| 17978 | 'Ncoa2'    | 2.25  | 3.55  | 6.61 | 0    | 0.88 | 1.64  | 6.26 | 1.51  | 1.18  | 5.72    |
| 17979 | 'Ncoa3'    | 6.96  | 7.32  | 8.83 | 18.1 | 6.69 | 5.79  | 5.88 | 3.64  | 6.62  | 5.96    |
| 17984 | 'Ndn'      | 1802  | 1607  | 1305 | 944  | 1295 | 1442  | 1404 | 609.2 | 1525  | 1780.72 |
| 17986 | 'Ndp'      | 2.83  | 1.94  | 0    | 6.04 | 3.23 | 0     | 0.28 | 0     | 3.35  | 1.67    |
| 17988 | 'Ndrgr1'   | 45.51 | 38.54 | 46.9 | 45.2 | 37.4 | 72.8  | 41.2 | 27.11 | 15.37 | 6.05    |
| 17991 | 'Ndufa2'   | 448.7 | 394.7 | 560  | 446  | 383  | 767.6 | 448  | 286.2 | 540.4 | 381.56  |
| 17992 | 'Ndufa4'   | 1027  | 991   | 1199 | 958  | 962  | 1161  | 1125 | 1000  | 1019  | 997.95  |



|       |           |       |       |      |      |      |       |      |       |       |         |
|-------|-----------|-------|-------|------|------|------|-------|------|-------|-------|---------|
| 18099 | 'Nlk'     | 6.87  | 2.43  | 1.76 | 2.43 | 5.8  | 1.57  | 4.24 | 1.28  | 0.32  | 2.04    |
| 18100 | 'Mrpl40'  | 97.8  | 71.7  | 103  | 73.8 | 82.4 | 125.5 | 113  | 139.1 | 115   | 122.96  |
| 18101 | 'Nmbr'    | 0     | 13.77 | 0    | 0    | 1.59 | 0     | 0    | 1.58  | 0     | 0.86    |
| 18102 | 'Nme1'    | 631.5 | 641   | 565  | 842  | 561  | 928.3 | 541  | 838.9 | 780.6 | 663.07  |
| 18103 | 'Nme2'    | 241.7 | 242   | 193  | 261  | 155  | 291   | 239  | 278.7 | 266.5 | 260.55  |
| 18104 | 'Nqo1'    | 0.29  | 2.82  | 1.41 | 0.04 | 0.38 | 11.32 | 0    | 2.64  | 0.03  | 3.92    |
| 18105 | 'Nqo2'    | 7.71  | 2.73  | 3.84 | 6.86 | 3.02 | 4.55  | 6.09 | 1.95  | 0.68  | 1.78    |
| 18107 | 'Nmt1'    | 40.68 | 30.41 | 26.2 | 42.4 | 39.6 | 23.71 | 48.9 | 25.02 | 36.46 | 42.61   |
| 18108 | 'Nmt2'    | 6.34  | 6.3   | 4.54 | 0.88 | 4.62 | 3.41  | 4.08 | 2.25  | 1.41  | 7.92    |
| 18109 | 'Mycn'    | 6.02  | 7.58  | 2.1  | 14.9 | 0    | 0     | 7.17 | 7.24  | 6.09  | 0       |
| 18111 | 'Nnat'    | 829.8 | 1300  | 752  | 728  | 958  | 1587  | 670  | 1013  | 757.9 | 1700.99 |
| 18113 | 'Nnmt'    | 5.39  | 2.1   | 3.61 | 13.3 | 0    | 0     | 0    | 16.04 | 0     | 1.49    |
| 18114 | 'Rrp1'    | 391.5 | 352   | 402  | 252  | 415  | 512.9 | 390  | 376.7 | 397   | 400.55  |
| 18115 | 'Nnt'     | 7.29  | 8.69  | 1.76 | 15   | 9.09 | 3.76  | 13   | 7.34  | 7.52  | 4.4     |
| 18117 | 'Emc8'    | 13.98 | 23.95 | 19.6 | 5.25 | 12.7 | 9.3   | 25.9 | 13.17 | 29.69 | 12.72   |
| 18119 | 'Nodal'   | 0     | 0     | 0    | 5.58 | 0    | 11.29 | 0    | 0     | 10.96 | 0.1     |
| 18120 | 'Mrpl49'  | 48.38 | 52.7  | 44.5 | 94.4 | 62.2 | 84.17 | 53.7 | 57.99 | 31.42 | 68.92   |
| 18121 | 'Nog'     | 0     | 0     | 0.08 | 1.67 | 0.08 | 0     | 0    | 0.65  | 0     | 0       |
| 18124 | 'Nr4a3'   | 0     | 0.85  | 0.09 | 0.46 | 0    | 0.06  | 0.02 | 0     | 0.06  | 0.01    |
| 18125 | 'Nos1'    | 17.72 | 8.89  | 1.45 | 3.45 | 5.85 | 15.42 | 2.05 | 3.19  | 11.6  | 13.24   |
| 18127 | 'Nos3'    | 1.05  | 0.63  | 2.57 | 0.62 | 0.61 | 2.07  | 0.78 | 1.45  | 1.36  | 2.75    |
| 18128 | 'Notch1'  | 0.99  | 0     | 0.02 | 2.67 | 1.25 | 0.76  | 1.27 | 0.81  | 1.84  | 0.3     |
| 18129 | 'Notch2'  | 1.39  | 0.46  | 1.97 | 1    | 2.36 | 0.42  | 0.33 | 1.33  | 1.56  | 1.8     |
| 18130 | 'Ints6'   | 2.77  | 1.04  | 4.13 | 1.09 | 0.52 | 1.59  | 5.31 | 2.56  | 5.05  | 3.56    |
| 18131 | 'Notch3'  | 1.07  | 0.72  | 0.08 | 1.19 | 0.02 | 0.06  | 0.74 | 0.12  | 0.07  | 0.23    |
| 18132 | 'Notch4'  | 0.21  | 0.36  | 0.19 | 0.27 | 0.11 | 0     | 0.07 | 0.14  | 0.76  | 0.2     |
| 18133 | 'Nov'     | 0     | 0     | 0    | 0    | 0    | 0.5   | 4.62 | 0.1   | 0.51  | 2.87    |
| 18139 | 'Zfp638'  | 9.83  | 9.42  | 9.4  | 7.09 | 5.03 | 5.31  | 12.4 | 12.12 | 10.92 | 13.82   |
| 18140 | 'Uhrf1'   | 0     | 0.01  | 0    | 0    | 0.01 | 2.42  | 0    | 0.01  | 0     | 0       |
| 18141 | 'Nup50'   | 4.96  | 9.91  | 11.3 | 11.4 | 6.36 | 5.58  | 7.34 | 11.88 | 12.51 | 8.46    |
| 18142 | 'Npas1'   | 0     | 0     | 0.39 | 0    | 0    | 0     | 0    | 0     | 0     | 0       |
| 18143 | 'Npas2'   | 0     | 3.14  | 0    | 4.85 | 0.67 | 0     | 7.78 | 0.02  | 0     | 2.16    |
| 18145 | 'Npc1'    | 3.24  | 1.89  | 11.2 | 1.65 | 6.83 | 5.06  | 3.75 | 4.94  | 1.94  | 3.62    |
| 18146 | 'Npdc1'   | 328.6 | 377.2 | 401  | 241  | 238  | 413.6 | 383  | 424.5 | 357.9 | 468.8   |
| 18148 | 'Npm1'    | 142.3 | 173.5 | 142  | 211  | 144  | 157.7 | 118  | 147.8 | 152.1 | 131.76  |
| 18150 | 'Npm3'    | 4.64  | 4.5   | 6.62 | 8.65 | 0    | 16.47 | 5.73 | 16.21 | 7.94  | 10.54   |
| 18155 | 'Pnoc'    | 103.6 | 80.23 | 77.5 | 105  | 84   | 99.73 | 15.9 | 159.9 | 97.42 | 19.31   |
| 18158 | 'Nppb'    | 0.3   | 0     | 0.39 | 0.16 | 0.25 | 0.38  | 0.17 | 0     | 0.07  | 0.06    |
| 18159 | 'Nppc'    | 5.3   | 4.67  | 5.44 | 5.5  | 2.78 | 3.41  | 10.4 | 10.24 | 5.21  | 8.14    |
| 18160 | 'Npr1'    | 0.29  | 0     | 0    | 0    | 0    | 0     | 0    | 0     | 2.98  | 10.95   |
| 18163 | 'Ctnnd2'  | 10.74 | 8.59  | 11.4 | 7.87 | 15.9 | 13.24 | 5.68 | 3.44  | 10.53 | 6.92    |
| 18164 | 'Nptx1'   | 13.16 | 2.64  | 6.03 | 3.74 | 6.92 | 2.51  | 7.79 | 4.31  | 3.91  | 6.91    |
| 18166 | 'Npy1r'   | 110.1 | 43    | 41.6 | 0    | 5.6  | 71.9  | 296  | 255.4 | 40.7  | 176.9   |
| 18167 | 'Npy2r'   | 322.4 | 72.8  | 218  | 0    | 216  | 13    | 639  | 81.4  | 21.6  | 40      |
| 18168 | 'Npy5r'   | 9.9   | 0     | 22.1 | 0    | 19.7 | 40.5  | 105  | 86.8  | 26.8  | 28.6    |
| 18173 | 'Slc11a1' | 0.02  | 0     | 0    | 0    | 0    | 7.17  | 0    | 0     | 0.02  | 0       |
| 18174 | 'Slc11a2' | 6.82  | 12.82 | 7.75 | 1.39 | 6.85 | 9.42  | 16.3 | 17.42 | 17.66 | 5.08    |
| 18175 | 'Nrap'    | 0.02  | 0     | 0.04 | 3.94 | 0.01 | 0.01  | 0.02 | 0.69  | 0.02  | 0.01    |
| 18176 | 'Nras'    | 7.53  | 9.63  | 5.08 | 9.14 | 11.1 | 8.95  | 3.48 | 4.91  | 8.12  | 5.36    |
| 18181 | 'Nrf1'    | 5.96  | 2.45  | 9.07 | 6.87 | 6.96 | 8.86  | 0.07 | 5.75  | 12.48 | 13.49   |
| 18183 | 'Nrg3'    | 1.48  | 0.02  | 1.24 | 2.39 | 1.9  | 2.71  | 0    | 1.34  | 1.43  | 0.78    |
| 18185 | 'Nrl'     | 0.8   | 1.44  | 0    | 6.58 | 0    | 4.42  | 0    | 0.03  | 5.41  | 0.04    |
| 18186 | 'Nrp1'    | 31.04 | 13.1  | 10.9 | 1.87 | 16.7 | 11.11 | 30.2 | 15.59 | 3.47  | 20.41   |
| 18187 | 'Nrp2'    | 18.43 | 20.09 | 5.45 | 2.2  | 20.4 | 1.34  | 9.11 | 4.64  | 4.81  | 5.91    |
| 18188 | 'Nrtn'    | 0     | 0     | 0.07 | 0    | 1.14 | 0     | 0    | 0     | 0     | 0       |
| 18189 | 'Nrxn1'   | 57.12 | 47.66 | 37.2 | 42.7 | 39.2 | 58.39 | 72.1 | 40.31 | 34.74 | 27.91   |
| 18190 | 'Nrxn2'   | 11.38 | 11.96 | 15.8 | 16.6 | 22.5 | 15.41 | 14.3 | 12.3  | 9.94  | 11.98   |
| 18191 | 'Nrxn3'   | 76.65 | 67.46 | 48.4 | 36.4 | 48.3 | 43.78 | 48.7 | 70.69 | 40.35 | 15.64   |

|       |             |       |       |      |      |      |       |      |       |       |        |
|-------|-------------|-------|-------|------|------|------|-------|------|-------|-------|--------|
| 18193 | 'Nsd1'      | 5.51  | 3.14  | 2.77 | 6.36 | 6.18 | 4.47  | 3.53 | 3.72  | 7.73  | 5.72   |
| 18194 | 'Nsdhl'     | 18.24 | 11.91 | 10.2 | 32.2 | 30.4 | 49.49 | 17.4 | 26.8  | 17.5  | 22.16  |
| 18195 | 'Nsf'       | 252.1 | 240.5 | 321  | 169  | 241  | 243.4 | 389  | 329.4 | 334.4 | 242.53 |
| 18196 | 'Nsg1'      | 497.9 | 482.9 | 477  | 384  | 471  | 440.4 | 486  | 618.1 | 447.7 | 433.66 |
| 18197 | 'Nsg2'      | 240.7 | 225.5 | 281  | 123  | 268  | 206.3 | 263  | 256.7 | 310.9 | 291.41 |
| 18201 | 'Nsmaf'     | 2.98  | 6.88  | 6.19 | 1.11 | 5.55 | 2.01  | 13.8 | 2.01  | 13.35 | 6.45   |
| 18203 | 'Ntan1'     | 55.04 | 63.71 | 61.8 | 34.7 | 49.7 | 44.09 | 36   | 60.18 | 46.1  | 56.84  |
| 18205 | 'Ntf3'      | 0     | 0     | 0    | 0    | 0    | 0     | 0    | 1.86  | 0     | 0      |
| 18207 | 'Nthl1'     | 0     | 4.67  | 0.78 | 0.05 | 6.48 | 9.9   | 0    | 3.21  | 2.51  | 2.29   |
| 18208 | 'Ntn1'      | 0     | 0     | 3.61 | 0.02 | 0.03 | 3.18  | 0    | 0     | 0     | 0.98   |
| 18209 | 'Ntn3'      | 2.28  | 1.33  | 1.49 | 1.66 | 0.6  | 0.64  | 0.97 | 1.84  | 2.51  | 0.99   |
| 18212 | 'Ntrk2'     | 42.84 | 49.94 | 34.5 | 35.2 | 24.2 | 39.68 | 46.6 | 33.25 | 43.15 | 37.45  |
| 18213 | 'Ntrk3'     | 31.17 | 22.06 | 20   | 10.7 | 20.8 | 28.28 | 18.8 | 17.37 | 15.99 | 16.12  |
| 18214 | 'Ddr2'      | 0     | 0     | 1.7  | 0    | 0.33 | 0.98  | 2.38 | 0     | 0     | 0      |
| 18216 | 'Ntsr1'     | 0.33  | 0.15  | 2.55 | 0    | 0    | 0     | 0    | 2.51  | 7.13  | 2.11   |
| 18217 | 'Ntsr2'     | 121   | 126.3 | 50.9 | 43.9 | 24.2 | 179.2 | 77.3 | 56.21 | 99.3  | 37.86  |
| 18218 | 'Dusp8'     | 31.06 | 26.13 | 53.7 | 31.1 | 50.5 | 49.66 | 46.1 | 47.65 | 31.51 | 38.12  |
| 18220 | 'Nucb1'     | 58.86 | 68.88 | 67.7 | 41   | 118  | 92.42 | 86.2 | 93.49 | 151.1 | 147.24 |
| 18221 | 'Nudc'      | 282.7 | 278.2 | 234  | 198  | 281  | 310   | 319  | 274.2 | 331.4 | 278.91 |
| 18222 | 'Numb'      | 2.65  | 6.51  | 1.52 | 6.65 | 3.83 | 1.22  | 7.61 | 4.46  | 2.32  | 5.18   |
| 18223 | 'Numbl'     | 6.57  | 5.22  | 2.33 | 3.31 | 3.76 | 4.49  | 10   | 6.82  | 1.91  | 1.14   |
| 18226 | 'Nup62'     | 2.48  | 5.63  | 7.33 | 10.2 | 13.4 | 8.18  | 7.58 | 6.5   | 7.53  | 10.46  |
| 18227 | 'Nr4a2'     | 7.45  | 3.28  | 6.8  | 0.79 | 4.98 | 5.07  | 0    | 6.99  | 0.01  | 7.87   |
| 18230 | 'Nxn'       | 0.94  | 3.44  | 2.21 | 0    | 1.51 | 0     | 1.18 | 0     | 0     | 0      |
| 18231 | 'Nxph1'     | 20.85 | 8.39  | 17.7 | 37   | 52.6 | 30.3  | 57.2 | 20.34 | 3.27  | 11.54  |
| 18242 | 'Oat'       | 52.46 | 62.28 | 85.2 | 56.8 | 77.5 | 125.2 | 72.2 | 85.9  | 131.9 | 123.71 |
| 18245 | 'Oaz1'      | 1018  | 860.2 | 731  | 903  | 1001 | 1327  | 985  | 936.7 | 823.7 | 963.91 |
| 18247 | 'Oaz2'      | 393.4 | 369.4 | 323  | 422  | 321  | 485.8 | 427  | 384.4 | 325.3 | 366.77 |
| 18260 | 'Ocln'      | 1.06  | 0     | 0    | 0    | 0    | 3.82  | 0    | 0     | 1.62  | 2.86   |
| 18261 | 'Ocm'       | 0     | 0.1   | 0    | 0    | 0    | 0     | 0    | 0     | 0     | 0      |
| 18263 | 'Odc1'      | 11.57 | 18.89 | 12.2 | 49.3 | 14.9 | 15.01 | 16.4 | 8.16  | 3.76  | 4.57   |
| 18286 | 'Odf2'      | 28.49 | 23.3  | 34.3 | 36.5 | 22.2 | 57.38 | 32   | 19.94 | 19.87 | 42.81  |
| 18291 | 'Nobox'     | 0     | 0     | 0    | 0    | 3.63 | 0     | 0    | 0     | 0     | 0      |
| 18293 | 'Ogdh'      | 50.07 | 55.04 | 91.6 | 43.4 | 63.5 | 51.42 | 73.9 | 56.56 | 82.91 | 86.65  |
| 18294 | 'Ogg1'      | 2.1   | 2.2   | 1.73 | 2.76 | 9.29 | 1.41  | 1.02 | 2.84  | 4.72  | 2.12   |
| 18295 | 'Ogn'       | 0     | 0     | 0.09 | 0    | 0    | 0     | 0    | 0     | 2.28  | 0.05   |
| 18301 | 'Fxyd5'     | 4.1   | 5.02  | 0    | 0    | 3.08 | 0     | 0    | 1.37  | 3.3   | 1.38   |
| 18302 | 'Oit3'      | 0     | 0     | 0    | 0    | 0    | 0     | 0    | 0     | 0.05  | 0      |
| 18307 | 'Olf10'     | 0     | 0     | 0    | 0.06 | 0    | 0     | 0    | 0     | 0     | 0      |
| 18323 | 'Olf25'     | 2.18  | 0     | 0    | 0    | 0    | 0     | 0    | 0     | 0     | 0      |
| 18330 | 'Olf31'     | 0     | 0     | 0.05 | 0    | 0    | 0     | 0    | 0     | 0     | 0      |
| 18341 | 'Olf263'    | 0     | 0     | 0.05 | 0    | 0    | 0     | 0    | 0     | 0     | 0      |
| 18359 | 'Olf59'     | 0     | 0.04  | 0    | 0    | 0    | 0     | 0    | 0     | 0     | 0      |
| 18377 | 'Omg'       | 106.5 | 102.4 | 95   | 105  | 72.5 | 145   | 132  | 167   | 85.54 | 69.21  |
| 18378 | 'Omp'       | 0.02  | 22.45 | 9.95 | 0    | 0    | 0     | 0    | 0     | 0.02  | 0      |
| 18383 | 'Tnfrsf11b' | 2.39  | 0     | 0    | 5.17 | 0    | 1.12  | 0    | 0     | 0     | 0      |
| 18386 | 'Oprd1'     | 0.83  | 0.86  | 0    | 3.55 | 0.04 | 0     | 0.01 | 0     | 0     | 0      |
| 18387 | 'Oprk1'     | 3.21  | 21.54 | 16.9 | 7.55 | 2.51 | 5.01  | 7.73 | 2.92  | 7.34  | 1.89   |
| 18389 | 'Oprl1'     | 64.73 | 79.73 | 57.8 | 93.2 | 41.9 | 63.58 | 90.5 | 92.11 | 55.15 | 89.73  |
| 18390 | 'Oprm1'     | 8.91  | 5.27  | 2.99 | 0    | 0    | 6.91  | 6.6  | 3.14  | 0     | 2.54   |
| 18391 | 'Sigmar1'   | 40.98 | 44.13 | 39   | 15.8 | 56.7 | 29.94 | 28.8 | 69.12 | 54.47 | 81.62  |
| 18392 | 'Orc1'      | 0     | 0.02  | 0    | 0    | 0.02 | 0     | 0    | 0     | 0.21  | 0.21   |
| 18393 | 'Orc2'      | 10.95 | 15.28 | 9.19 | 10.5 | 13.2 | 9.05  | 4.9  | 9.94  | 16.12 | 4.95   |
| 18407 | 'Orm3'      | 0     | 1.8   | 0    | 0    | 0    | 0.02  | 0    | 0     | 0     | 0      |
| 18408 | 'Slc25a15'  | 0     | 0     | 1.75 | 0    | 1.76 | 0     | 4.95 | 3.04  | 7.77  | 0      |
| 18412 | 'Sqstm1'    | 575.6 | 568.8 | 707  | 748  | 373  | 348.7 | 558  | 480.3 | 502.5 | 464.84 |
| 18414 | 'Osmr'      | 0     | 0     | 0    | 0    | 0.05 | 0     | 0    | 0     | 0     | 0      |
| 18415 | 'Hspa4l'    | 46.54 | 37.49 | 41.4 | 38.6 | 28   | 53.51 | 60.7 | 42.15 | 58.92 | 54.97  |

|       |            |       |       |      |      |      |       |      |       |       |        |
|-------|------------|-------|-------|------|------|------|-------|------|-------|-------|--------|
| 18417 | 'Cldn11'   | 28.55 | 52.55 | 2.91 | 0.03 | 58.4 | 94.95 | 0.03 | 24.05 | 0.9   | 1.9    |
| 18419 | 'Otog'     | 0     | 0     | 0.62 | 0    | 0    | 0     | 0    | 0     | 0     | 0      |
| 18420 | 'Otp'      | 0     | 7.37  | 0    | 0    | 0.03 | 0     | 23   | 0     | 0     | 0      |
| 18423 | 'Otx1'     | 0     | 0     | 0.02 | 0    | 31.1 | 3.73  | 0    | 0     | 0     | 0      |
| 18424 | 'Otx2'     | 0     | 2.34  | 3.8  | 0.05 | 1.28 | 0.02  | 0    | 0     | 0.02  | 8.62   |
| 18429 | 'Oxt'      | 1.54  | 0.2   | 2.15 | 5.18 | 0    | 6.88  | 3.96 | 1.04  | 14.34 | 0      |
| 18430 | 'Oxtr'     | 0.26  | 0     | 3.85 | 1.08 | 0.15 | 1.33  | 0    | 0.72  | 0     | 0      |
| 18431 | 'Oca2'     | 1.9   | 1.05  | 0    | 2.22 | 0    | 0     | 0    | 1.05  | 0     | 0      |
| 18432 | 'Mybbp1a'  | 14.57 | 13.81 | 17.8 | 0.39 | 7.71 | 8.49  | 20.9 | 11.33 | 18.7  | 18.39  |
| 18436 | 'P2rx1'    | 0     | 0     | 0    | 0    | 0    | 0     | 0.66 | 0     | 0     | 0      |
| 18438 | 'P2rx4'    | 4.36  | 12.87 | 0.09 | 0.07 | 8.2  | 13.9  | 11.6 | 9.91  | 5.76  | 2.32   |
| 18439 | 'P2rx7'    | 0     | 2.43  | 6.62 | 0    | 0    | 1.15  | 4.61 | 0     | 0     | 0      |
| 18440 | 'P2rx6'    | 0     | 1.33  | 2.88 | 0    | 0.37 | 0     | 0.87 | 0     | 0     | 8.13   |
| 18441 | 'P2ry1'    | 1.47  | 3.61  | 1.1  | 0    | 4.51 | 6.24  | 2.43 | 2.49  | 6.96  | 1.07   |
| 18442 | 'P2ry2'    | 0     | 0     | 0    | 0    | 0    | 0     | 0.02 | 0     | 2.07  | 0      |
| 18451 | 'P4ha1'    | 31.56 | 41.1  | 18.2 | 21.4 | 8.67 | 20.09 | 41.6 | 15.56 | 21.26 | 30.65  |
| 18452 | 'P4ha2'    | 23.23 | 17.21 | 12.7 | 13.5 | 10.1 | 24.66 | 5.35 | 22.07 | 19.02 | 20     |
| 18453 | 'P4hb'     | 118.8 | 119.4 | 102  | 105  | 87.2 | 85.97 | 89   | 95.37 | 124.7 | 114.21 |
| 18457 | 'Bloc1s6'  | 38.85 | 31.04 | 28.1 | 5.95 | 33.9 | 32.84 | 33.4 | 28.33 | 34.11 | 22.08  |
| 18458 | 'Pabpc1'   | 17    | 15.64 | 14.4 | 22.4 | 7.55 | 12.8  | 8.11 | 13.65 | 14.88 | 16.78  |
| 18472 | 'Pafah1b1' | 16.38 | 16.85 | 11.4 | 14.4 | 15.8 | 6.69  | 15.3 | 13.67 | 19.02 | 14.29  |
| 18475 | 'Pafah1b2' | 103.4 | 74.38 | 72.6 | 57   | 59.1 | 69.82 | 62.8 | 80.4  | 87.61 | 82.03  |
| 18476 | 'Pafah1b3' | 101.3 | 97.99 | 145  | 115  | 107  | 110.3 | 100  | 143.4 | 165.4 | 169.74 |
| 18477 | 'Prdx1'    | 361.3 | 315.8 | 328  | 281  | 395  | 480.9 | 295  | 363.6 | 345.3 | 446.42 |
| 18479 | 'Pak1'     | 64.53 | 117.2 | 96.1 | 32.8 | 69.9 | 46.27 | 93.1 | 80.21 | 85.79 | 56.37  |
| 18481 | 'Pak3'     | 70.18 | 77.35 | 41.9 | 67.7 | 30.4 | 53.27 | 35   | 59.3  | 51.8  | 52.68  |
| 18483 | 'Palm'     | 27.68 | 22.58 | 15.9 | 16.6 | 30.4 | 15.01 | 14.2 | 11.24 | 20.7  | 10.03  |
| 18484 | 'Pam'      | 62.38 | 32.44 | 60.2 | 93.1 | 52.7 | 17.19 | 36.1 | 14.82 | 62.18 | 54.38  |
| 18488 | 'Cntn3'    | 0.05  | 0     | 0    | 1.4  | 3.1  | 2.38  | 2.19 | 0.39  | 0     | 0      |
| 18491 | 'Pappa'    | 0     | 0.83  | 0    | 0    | 0    | 0     | 0    | 1.1   | 0     | 0.02   |
| 18504 | 'Pax2'     | 0     | 0     | 0.02 | 0    | 0.08 | 0     | 0    | 0     | 0.87  | 0      |
| 18506 | 'Pax4'     | 0     | 0     | 0    | 0.1  | 0    | 0     | 0    | 0     | 0     | 0      |
| 18508 | 'Pax6'     | 0     | 0     | 0.72 | 0    | 0.03 | 0     | 4.5  | 0     | 0.04  | 0      |
| 18511 | 'Pax9'     | 0     | 0     | 0.01 | 0    | 0.08 | 0.01  | 0    | 0     | 0     | 0      |
| 18514 | 'Pbx1'     | 4.44  | 10.15 | 3.91 | 5.64 | 12.3 | 5.48  | 4.38 | 6.68  | 2.43  | 4.31   |
| 18515 | 'Pbx2'     | 1.15  | 0.7   | 1.07 | 4.15 | 1.27 | 0.69  | 2.11 | 1.35  | 2.29  | 0.75   |
| 18516 | 'Pbx3'     | 6.39  | 0.01  | 2.56 | 0    | 16   | 0.62  | 8.21 | 8.06  | 0     | 1.79   |
| 18518 | 'lgbp1'    | 6.71  | 8.74  | 8.08 | 8.03 | 8.63 | 6.62  | 7.68 | 7.11  | 12.74 | 10.13  |
| 18519 | 'Kat2b'    | 1.06  | 0.62  | 0.42 | 2.33 | 1.65 | 0.02  | 0    | 0.11  | 0     | 0.01   |
| 18521 | 'Pcbp2'    | 21.93 | 46.01 | 26.1 | 43.2 | 55.7 | 81.81 | 29.4 | 19.04 | 35.15 | 63.57  |
| 18526 | 'Pcdh10'   | 5.37  | 6.18  | 12.8 | 6.31 | 7.83 | 7.96  | 4.03 | 7.31  | 11.32 | 8.02   |
| 18530 | 'Pcdh8'    | 0.01  | 5.89  | 6.08 | 0    | 10.3 | 4.47  | 8.93 | 7.09  | 4.48  | 3.52   |
| 18536 | 'Pcm1'     | 12.25 | 11.79 | 15   | 16.1 | 13.7 | 11.62 | 9.98 | 9.26  | 4.77  | 8.69   |
| 18537 | 'Pcmt1'    | 214   | 204.1 | 180  | 186  | 210  | 209.4 | 200  | 222.2 | 212.2 | 218.02 |
| 18538 | 'Pcna'     | 43.81 | 46.03 | 39.4 | 37.8 | 39.1 | 42.29 | 21   | 29.45 | 87.82 | 74.16  |
| 18541 | 'Pcnt'     | 1.89  | 2.42  | 0.59 | 1.57 | 1.87 | 1.91  | 0.01 | 2.63  | 2.09  | 0.91   |
| 18542 | 'Pcolce'   | 0     | 0     | 0    | 0    | 1.42 | 0     | 0    | 0.84  | 0     | 0      |
| 18546 | 'Pcp4'     | 2156  | 653.1 | 1614 | 3263 | 1144 | 1412  | 1302 | 1380  | 523.2 | 849.72 |
| 18548 | 'Pcsk1'    | 16.46 | 31.46 | 30.5 | 16.9 | 7.1  | 28.98 | 0.1  | 9.97  | 81.23 | 93.43  |
| 18549 | 'Pcsk2'    | 27.67 | 62.43 | 61.7 | 66.3 | 53.7 | 52.96 | 134  | 17.79 | 42.59 | 96.7   |
| 18550 | 'Furin'    | 0.07  | 0.16  | 0.4  | 2.42 | 0.16 | 0.72  | 0    | 0.33  | 0     | 0.28   |
| 18551 | 'Pcsk4'    | 6.25  | 5.79  | 7.68 | 7.38 | 2.62 | 13.42 | 3.32 | 7.67  | 8.78  | 7.29   |
| 18552 | 'Pcsk5'    | 5.93  | 3.29  | 0.37 | 13.2 | 3.57 | 7.62  | 36.5 | 1.4   | 21.85 | 3.19   |
| 18553 | 'Pcsk6'    | 0     | 0     | 0    | 0    | 0.02 | 0     | 0    | 2.53  | 0     | 0      |
| 18554 | 'Pcsk7'    | 10    | 1.53  | 5.71 | 8.6  | 9.07 | 0.53  | 5.32 | 4.01  | 4.35  | 6.93   |
| 18555 | 'Cdk16'    | 19.71 | 8.74  | 10.1 | 12.4 | 18.3 | 19.38 | 33.3 | 9.22  | 37.74 | 2      |
| 18557 | 'Cdk18'    | 11.54 | 19    | 25.6 | 22.3 | 30.3 | 27.89 | 23.8 | 25.87 | 24.5  | 23.72  |
| 18559 | 'Pctp'     | 0     | 0     | 1.73 | 0.04 | 5.71 | 0     | 0    | 0     | 0     | 0.09   |



|       |           |       |       |      |      |      |       |      |       |       |        |
|-------|-----------|-------|-------|------|------|------|-------|------|-------|-------|--------|
| 18563 | 'Pcx'     | 3.39  | 6.7   | 8.54 | 12.1 | 12.9 | 6.22  | 27.5 | 6.1   | 2.53  | 14.53  |
| 18567 | 'Pdcd2'   | 25.97 | 33.51 | 42   | 17.3 | 23   | 3.83  | 44.9 | 11.98 | 50.47 | 1.81   |
| 18569 | 'Pdcd4'   | 69.03 | 75.98 | 65   | 156  | 78   | 25.27 | 30.5 | 58.97 | 92.46 | 77.32  |
| 18570 | 'Pdcd6'   | 52.39 | 52.98 | 80.9 | 95.8 | 89.4 | 88.18 | 79.2 | 72.36 | 64.02 | 75.34  |
| 18571 | 'Pdcd6ip' | 12.45 | 10.51 | 18.8 | 10.7 | 6.49 | 5.37  | 17.1 | 5.84  | 17.39 | 12.74  |
| 18572 | 'Pdcd11'  | 2.1   | 2.65  | 4.93 | 6.52 | 0.51 | 1.26  | 1.4  | 1.82  | 1.79  | 7.19   |
| 18573 | 'Pde1a'   | 10.45 | 41.79 | 6.21 | 0.06 | 16.5 | 12.95 | 17.8 | 18.76 | 24.67 | 38.03  |
| 18574 | 'Pde1b'   | 22.22 | 14.49 | 42.4 | 6.58 | 14.5 | 20.66 | 56   | 30.03 | 14.27 | 3.6    |
| 18575 | 'Pde1c'   | 0.54  | 8.89  | 0.48 | 16   | 4.52 | 0.35  | 0.19 | 7.94  | 0     | 0.97   |
| 18576 | 'Pde3b'   | 0.15  | 0.16  | 0.3  | 2.43 | 0.83 | 0.11  | 1.92 | 0.68  | 0.32  | 1.94   |
| 18577 | 'Pde4a'   | 14.88 | 15.03 | 27.8 | 8.89 | 24   | 12.38 | 32.4 | 19.9  | 23.64 | 27.46  |
| 18578 | 'Pde4b'   | 26.79 | 30.5  | 34.6 | 16.5 | 24.9 | 36.96 | 20.9 | 41.48 | 12.15 | 24.57  |
| 18582 | 'Pde6d'   | 103.6 | 70.05 | 41.1 | 93.1 | 78.4 | 80.61 | 42.7 | 70.16 | 85.06 | 26.39  |
| 18583 | 'Pde7a'   | 6     | 1.82  | 0.11 | 4.69 | 0.23 | 0.09  | 0    | 0.08  | 5.51  | 0.01   |
| 18584 | 'Pde8a'   | 0.21  | 0.57  | 0    | 0.06 | 4.01 | 0     | 0    | 0     | 0     | 0      |
| 18585 | 'Pde9a'   | 8.16  | 13.29 | 6.14 | 15.6 | 8.58 | 12.5  | 19.3 | 32.23 | 24.94 | 11.31  |
| 18587 | 'Pde6b'   | 0     | 0     | 0    | 0    | 0    | 0.05  | 0    | 0     | 0     | 0.01   |
| 18590 | 'Pdgfa'   | 31.79 | 40.91 | 40.6 | 36.7 | 58.2 | 31.16 | 18.8 | 33.53 | 30.88 | 13.35  |
| 18591 | 'Pdgfb'   | 2.01  | 2.17  | 3.16 | 1.33 | 4.01 | 0.52  | 4.29 | 3.39  | 1.35  | 0.27   |
| 18595 | 'Pdgfra'  | 0     | 0     | 16.3 | 7.8  | 0.38 | 0     | 14.4 | 2.29  | 0     | 0      |
| 18596 | 'Pdgfrb'  | 0.74  | 0     | 1.26 | 0    | 0    | 1.34  | 0    | 0.68  | 1.97  | 0.16   |
| 18597 | 'Pdha1'   | 74.81 | 100.3 | 127  | 76.5 | 83.9 | 59.55 | 173  | 103.2 | 111.2 | 91.09  |
| 18599 | 'Padi1'   | 0     | 0     | 0    | 0    | 0    | 0.38  | 0    | 0     | 0     | 0      |
| 18600 | 'Padi2'   | 1.31  | 1.55  | 0.24 | 1.21 | 5.57 | 3.41  | 3.56 | 1.19  | 1.51  | 1.58   |
| 18602 | 'Padi4'   | 0     | 0.04  | 0.02 | 0.03 | 0    | 0     | 0    | 0     | 0     | 0.02   |
| 18604 | 'Pdk2'    | 27.51 | 47.4  | 59.4 | 22.3 | 31.7 | 51.67 | 71.5 | 67.77 | 31.39 | 36.92  |
| 18605 | 'Enpp1'   | 0     | 0     | 0    | 0    | 0.57 | 0     | 0    | 0.01  | 0     | 0.22   |
| 18606 | 'Enpp2'   | 46.27 | 90.39 | 21.3 | 34.6 | 7.55 | 61.6  | 29.9 | 27.24 | 62.26 | 60.06  |
| 18607 | 'Pdpk1'   | 14.78 | 14.58 | 27.7 | 9.73 | 6.39 | 27.34 | 15.4 | 14.48 | 21.2  | 7.16   |
| 18610 | 'Pdyn'    | 2.03  | 53.01 | 0.04 | 97.2 | 0.04 | 27.79 | 0.11 | 83.95 | 69.76 | 17.56  |
| 18611 | 'Pea15a'  | 379.6 | 426.7 | 258  | 417  | 386  | 402.8 | 269  | 341.7 | 442.6 | 408.03 |
| 18612 | 'Etv4'    | 0.56  | 2.05  | 5.24 | 1.72 | 0    | 0     | 5.24 | 1.01  | 1.03  | 0.35   |
| 18613 | 'Pecam1'  | 0     | 0     | 0    | 4.53 | 0    | 1.95  | 0    | 0     | 0     | 0      |
| 18616 | 'Peg3'    | 114.9 | 64.48 | 145  | 111  | 67.1 | 51.99 | 115  | 96.39 | 124.3 | 157.94 |
| 18617 | 'Rhox5'   | 0     | 0     | 0    | 0    | 0    | 0     | 0    | 2.26  | 0     | 0      |
| 18618 | 'Pemt'    | 4.87  | 21.67 | 10.8 | 10.6 | 1.32 | 3.71  | 0    | 7.21  | 6.88  | 20.29  |
| 18619 | 'Penk'    | 117.3 | 55.18 | 94.2 | 562  | 303  | 27.84 | 174  | 59.71 | 22.3  | 75.81  |
| 18624 | 'Pepd'    | 68.66 | 71.15 | 67.7 | 55.4 | 64.6 | 92.22 | 85.9 | 72.98 | 65.47 | 70.27  |
| 18626 | 'Per1'    | 1.2   | 6.53  | 2.99 | 24.2 | 3.08 | 1.7   | 3.2  | 2.22  | 1.54  | 9.12   |
| 18627 | 'Per2'    | 2.97  | 3.48  | 3.84 | 14.9 | 1.41 | 1.2   | 4.96 | 1.43  | 6.34  | 5.54   |
| 18628 | 'Per3'    | 16.08 | 7.58  | 7.9  | 23.5 | 16.8 | 10.82 | 5.11 | 11.17 | 11.61 | 15.15  |
| 18631 | 'Pex11a'  | 5.42  | 5.17  | 6.53 | 10.9 | 6.12 | 14.6  | 4.84 | 12.71 | 5.19  | 8.67   |
| 18632 | 'Pex11b'  | 68.69 | 50.22 | 41.7 | 58.9 | 45.7 | 68.48 | 60.3 | 45.45 | 54.6  | 65.92  |
| 18633 | 'Pex16'   | 49.41 | 25.18 | 37.3 | 20.4 | 21.6 | 44.16 | 39.3 | 42.54 | 42.4  | 36.78  |
| 18634 | 'Pex7'    | 39.34 | 22.24 | 39.4 | 27.6 | 19.3 | 45.8  | 28.2 | 32.09 | 17.95 | 27.75  |
| 18636 | 'Cfp'     | 5.71  | 7.44  | 4.69 | 1.2  | 4.22 | 0.03  | 5.22 | 2.6   | 6.65  | 0      |
| 18637 | 'Pfdn2'   | 279.6 | 194.2 | 229  | 320  | 292  | 358.4 | 166  | 230.8 | 297.8 | 255.78 |
| 18639 | 'Pfkfb1'  | 0.06  | 2.22  | 0.03 | 0    | 0    | 8.19  | 0    | 2.62  | 0     | 0      |
| 18640 | 'Pfkfb2'  | 6.11  | 4.21  | 9.58 | 0.1  | 6.5  | 1.74  | 9.13 | 3.89  | 5.4   | 3.63   |
| 18641 | 'PfkI'    | 68.93 | 99.23 | 80.4 | 106  | 81.6 | 90.55 | 92.1 | 96.63 | 96.5  | 91.12  |
| 18642 | 'PfkM'    | 91.8  | 88.96 | 145  | 54.8 | 72.9 | 126.6 | 97.7 | 92.87 | 74.54 | 107.55 |
| 18643 | 'Pfn1'    | 348.3 | 372.5 | 206  | 251  | 311  | 428.4 | 384  | 450.9 | 455   | 463.77 |
| 18645 | 'Pfn2'    | 183.8 | 188.5 | 196  | 195  | 258  | 242.5 | 285  | 226.6 | 148.1 | 184.47 |
| 18647 | 'Cdk14'   | 12.7  | 2.56  | 20.8 | 13.1 | 21.3 | 9.16  | 25.4 | 6.22  | 10.39 | 17.37  |
| 18648 | 'Pgam1'   | 545.4 | 612.9 | 676  | 434  | 613  | 802.8 | 704  | 655.9 | 524.4 | 599.53 |
| 18654 | 'Pgf'     | 0     | 6.99  | 8.51 | 11.2 | 2.78 | 0     | 3.75 | 14.77 | 31.13 | 15.89  |
| 18655 | 'Pgk1'    | 264   | 227.3 | 282  | 227  | 271  | 265   | 267  | 298   | 196.6 | 220.28 |
| 18667 | 'Pgr'     | 3.49  | 7.13  | 9.49 | 5.54 | 2.46 | 1     | 1.56 | 6.4   | 3.72  | 1.15   |

|       |           |       |       |      |      |      |       |      |       |       |        |
|-------|-----------|-------|-------|------|------|------|-------|------|-------|-------|--------|
| 18669 | 'Abcb1b'  | 0.86  | 0     | 0.54 | 0.04 | 0    | 0.05  | 0.03 | 0.09  | 0.01  | 0      |
| 18670 | 'Abcb4'   | 1.98  | 0.01  | 0.6  | 0.05 | 0    | 1.56  | 0    | 0     | 0     | 0.11   |
| 18671 | 'Abcb1a'  | 0.01  | 0     | 0    | 0.01 | 0    | 0     | 0    | 0.02  | 0.1   | 0      |
| 18673 | 'Phb'     | 144.5 | 165.2 | 172  | 164  | 97.9 | 185.5 | 151  | 141.1 | 168.8 | 157.56 |
| 18674 | 'Slc25a3' | 556.7 | 473.1 | 665  | 520  | 580  | 645.4 | 655  | 661.5 | 603.1 | 604.06 |
| 18675 | 'Phex'    | 0     | 0.02  | 0.04 | 0.04 | 0.03 | 0     | 0.05 | 0.03  | 0.02  | 0.02   |
| 18676 | 'Phf2'    | 1.82  | 2.38  | 0.87 | 2.95 | 0.07 | 0.04  | 2.68 | 0.25  | 0.55  | 1.17   |
| 18679 | 'Phka1'   | 6.8   | 7.94  | 5.59 | 6.1  | 1.75 | 3.29  | 1.39 | 1.68  | 2.41  | 6.43   |
| 18682 | 'Phkg1'   | 4.55  | 5.77  | 0.05 | 8.38 | 0    | 12.48 | 2.16 | 0.02  | 4.39  | 2.5    |
| 18685 | 'Phtf1'   | 4.25  | 4.7   | 5.52 | 3.28 | 6.99 | 10.32 | 3.28 | 2.83  | 1.15  | 12.22  |
| 18693 | 'Pick1'   | 48.75 | 51.67 | 38.1 | 51.5 | 75.7 | 75.45 | 21.6 | 44.88 | 57.19 | 76.64  |
| 18700 | 'Piga'    | 0     | 2.26  | 2.16 | 0    | 5.27 | 0     | 0    | 0     | 0     | 0      |
| 18701 | 'Pigf'    | 24.12 | 29.37 | 40.7 | 53.7 | 16.5 | 43.58 | 26.1 | 27.82 | 28.96 | 9.98   |
| 18703 | 'Pigr'    | 0.01  | 0.02  | 0.05 | 0.01 | 0.03 | 0.02  | 0.01 | 0.01  | 0.04  | 0.01   |
| 18704 | 'Pik3c2a' | 0.92  | 1.6   | 1.06 | 0.52 | 1.53 | 1.04  | 1.5  | 2.46  | 1.31  | 3.09   |
| 18706 | 'Pik3ca'  | 2.5   | 0.65  | 1.18 | 2.59 | 2.25 | 2.5   | 1.96 | 1.36  | 4.47  | 3.82   |
| 18707 | 'Pik3cd'  | 1.07  | 0.26  | 0.39 | 0.01 | 1.35 | 0.06  | 6.44 | 1.84  | 2.59  | 1.37   |
| 18708 | 'Pik3r1'  | 6.52  | 5.33  | 5.49 | 1.93 | 4.16 | 8.67  | 8.21 | 1.73  | 6.09  | 10.65  |
| 18709 | 'Pik3r2'  | 25.13 | 11.26 | 37.3 | 4.23 | 16.7 | 4.01  | 45   | 28.83 | 12.55 | 21.51  |
| 18710 | 'Pik3r3'  | 5.06  | 3.95  | 6.17 | 15.7 | 4.19 | 3.03  | 3.39 | 8.85  | 13.34 | 13.5   |
| 18711 | 'Pikfyve' | 0.12  | 0.76  | 2.09 | 0.66 | 0.53 | 0.15  | 1.23 | 0.5   | 1.69  | 1.03   |
| 18712 | 'Pim1'    | 0     | 0.6   | 0.17 | 1.7  | 0    | 1.18  | 0    | 0     | 0     | 0      |
| 18715 | 'Pim2'    | 56.36 | 82.72 | 61.9 | 53.4 | 47   | 84.53 | 53.5 | 65.16 | 79.66 | 75.58  |
| 18717 | 'Pip5k1c' | 7.1   | 9.13  | 22.8 | 13.4 | 9.7  | 5.61  | 11.7 | 10.4  | 4.73  | 4.26   |
| 18718 | 'Pip4k2a' | 11.28 | 2.28  | 0    | 1.59 | 9.35 | 1.81  | 0.14 | 2.72  | 1.27  | 3.41   |
| 18719 | 'Pip5k1b' | 11.22 | 11.99 | 7.54 | 2.18 | 0.12 | 0.11  | 5.34 | 1.26  | 2.53  | 2.38   |
| 18720 | 'Pip5k1a' | 13.18 | 19.81 | 24.9 | 14.7 | 21.3 | 19.17 | 6.78 | 13.84 | 13.44 | 11.47  |
| 18722 | 'Pira1'   | 0     | 0     | 0.2  | 0.13 | 0    | 0     | 0    | 0     | 0     | 0      |
| 18733 | 'Pirb'    | 0     | 0     | 0.09 | 0    | 0    | 0.47  | 0.14 | 0     | 0.06  | 0      |
| 18736 | 'Pou1f1'  | 0     | 0.11  | 0    | 0    | 0    | 0     | 0    | 0     | 0     | 0      |
| 18738 | 'Pitpna'  | 5.75  | 6.58  | 19.6 | 21.4 | 18.5 | 2.45  | 17.7 | 10.42 | 18.4  | 7.81   |
| 18739 | 'Pitpnm1' | 42.64 | 36.85 | 47.9 | 24.8 | 36.2 | 16.89 | 27.7 | 30.56 | 39.38 | 56.18  |
| 18744 | 'Pja1'    | 255.2 | 363.6 | 255  | 336  | 166  | 282.8 | 369  | 286.4 | 341.7 | 262.77 |
| 18746 | 'Pkm'     | 961.4 | 1007  | 1350 | 973  | 975  | 831.7 | 876  | 1200  | 878.9 | 803.57 |
| 18747 | 'Prkaca'  | 68.7  | 48.37 | 68.5 | 73.7 | 64.5 | 38.65 | 43.3 | 36.62 | 54.26 | 43.09  |
| 18749 | 'Prkacb'  | 225.4 | 177.7 | 127  | 131  | 100  | 28.25 | 140  | 125.3 | 118.9 | 172.73 |
| 18750 | 'Prkca'   | 3.05  | 3.37  | 3.05 | 8.69 | 2.24 | 0.67  | 2.55 | 1.05  | 0.89  | 1.53   |
| 18751 | 'Prkcb'   | 9.42  | 7.77  | 7.91 | 9.15 | 21.7 | 6.45  | 26.8 | 7.72  | 9.33  | 6.59   |
| 18752 | 'Prkcg'   | 23.29 | 13.86 | 25.4 | 12.1 | 38.2 | 35.26 | 19.7 | 22.09 | 5.63  | 12.54  |
| 18753 | 'Prkcd'   | 1.28  | 0     | 5.04 | 0    | 8.42 | 1.49  | 0    | 0.02  | 9.52  | 5.28   |
| 18754 | 'Prkce'   | 44.84 | 31.24 | 16.6 | 51.7 | 25.4 | 19.92 | 29.5 | 35.39 | 24.73 | 37.41  |
| 18755 | 'Prkch'   | 0.16  | 0     | 3.52 | 2.6  | 0.03 | 0     | 0    | 0.02  | 1.48  | 0      |
| 18759 | 'Prkci'   | 2.74  | 0.64  | 1.13 | 7.54 | 3.02 | 0.03  | 1.89 | 2.04  | 3.92  | 1.41   |
| 18760 | 'Prkd1'   | 1.4   | 0.07  | 0.03 | 4.36 | 0.25 | 0     | 1.66 | 2.66  | 0.08  | 0.03   |
| 18761 | 'Prkcd'   | 0.71  | 1.81  | 8.21 | 3.29 | 3.34 | 2.62  | 0.34 | 5.22  | 0     | 0      |
| 18762 | 'Prkcz'   | 24.9  | 33.04 | 35.5 | 29.3 | 33.7 | 33.07 | 22.1 | 31.73 | 30.49 | 22.32  |
| 18763 | 'Pkd1'    | 5.45  | 3.53  | 10   | 8.22 | 7.21 | 2.49  | 7.9  | 3.97  | 8.23  | 3.57   |
| 18764 | 'Pkd2'    | 1.99  | 0.04  | 0.04 | 0.98 | 1    | 0.45  | 1.31 | 0.45  | 0.28  | 1.27   |
| 18766 | 'Pkdrej'  | 0     | 0     | 0.11 | 0    | 0    | 0     | 0    | 0     | 0     | 0      |
| 18767 | 'Pkia'    | 58.8  | 96.94 | 71.2 | 41.1 | 52.2 | 15.96 | 103  | 40.46 | 32.06 | 22.65  |
| 18768 | 'Pkib'    | 12.72 | 20.64 | 8.31 | 0.37 | 15.4 | 11.31 | 0    | 13.13 | 11.4  | 15.12  |
| 18769 | 'Pkig'    | 60.73 | 67.47 | 69   | 207  | 75   | 54.77 | 38.2 | 60.18 | 42.43 | 77.19  |
| 18770 | 'Pkilr'   | 0.15  | 0     | 0.16 | 0.36 | 0.22 | 0     | 0    | 0     | 0.08  | 0      |
| 18771 | 'Pknx1'   | 2.3   | 2.91  | 0.26 | 5.65 | 1.7  | 0     | 1.23 | 5.32  | 2.83  | 0.47   |
| 18772 | 'Pkp1'    | 0     | 0     | 1.79 | 0    | 0    | 0     | 0    | 0     | 0     | 0      |
| 18777 | 'Lypla1'  | 33.25 | 22.07 | 15.7 | 2.54 | 3.83 | 11    | 21.8 | 15.03 | 11.85 | 17.3   |
| 18778 | 'Pla2g1b' | 0     | 0     | 0    | 0    | 0    | 0     | 0    | 0     | 0     | 0.43   |
| 18781 | 'Pla2g2c' | 1.51  | 0.48  | 0.24 | 0    | 0    | 0     | 0    | 0.95  | 0     | 3.09   |

|       |            |       |       |      |      |      |       |      |       |       |        |
|-------|------------|-------|-------|------|------|------|-------|------|-------|-------|--------|
| 18782 | 'Pla2g2d'  | 0     | 0.04  | 0.08 | 0.13 | 0.07 | 5.26  | 0.07 | 0.02  | 0.08  | 0.04   |
| 18783 | 'Pla2g4a'  | 0.02  | 0     | 0.2  | 0    | 0.24 | 0     | 0    | 0     | 0     | 0      |
| 18784 | 'Pla2g5'   | 0     | 0     | 0    | 0    | 4.29 | 0     | 0    | 0     | 0     | 0      |
| 18786 | 'Plaa'     | 8.73  | 8.11  | 8.15 | 6.07 | 2.66 | 6.76  | 9.88 | 8.51  | 11.8  | 7.49   |
| 18787 | 'Serpine1' | 2.05  | 0.66  | 0.16 | 1.17 | 0    | 0     | 0.51 | 0.08  | 0.38  | 0.56   |
| 18789 | 'Papola'   | 25.01 | 31.97 | 26.1 | 27.6 | 26.4 | 19.68 | 33.1 | 24.49 | 35.7  | 23.85  |
| 18791 | 'Plat'     | 13.51 | 13.75 | 4.29 | 7.03 | 15.7 | 5.22  | 4.7  | 16.61 | 3.8   | 16.2   |
| 18793 | 'Plaur'    | 0     | 0     | 0    | 0    | 0    | 1.75  | 0    | 0     | 1.47  | 0.69   |
| 18795 | 'Plcb1'    | 3.39  | 4.04  | 7.36 | 2.98 | 1.74 | 5.1   | 6.74 | 0.26  | 1.42  | 0.15   |
| 18796 | 'Plcb2'    | 0     | 0.74  | 0.04 | 0    | 0    | 0     | 0    | 0     | 0     | 0      |
| 18797 | 'Plcb3'    | 1.41  | 1.72  | 0    | 0    | 0.33 | 0.16  | 0    | 0.02  | 0     | 0      |
| 18798 | 'Plcb4'    | 3.07  | 12.46 | 5.61 | 28   | 12.6 | 7.59  | 6.77 | 9.13  | 4.9   | 6.61   |
| 18799 | 'Plcd1'    | 0     | 3.3   | 1.87 | 8.22 | 3.92 | 13.32 | 0    | 4.64  | 0     | 3.8    |
| 18802 | 'Plcd4'    | 8.09  | 23.08 | 14   | 22.7 | 6.4  | 18.47 | 0.75 | 9.73  | 8.79  | 12.84  |
| 18803 | 'Plcg1'    | 0.89  | 2.07  | 1.51 | 2.95 | 1.77 | 0.09  | 4.14 | 0.37  | 2.99  | 0.84   |
| 18805 | 'Pld1'     | 0     | 0.02  | 0.26 | 0    | 0    | 0.9   | 2.29 | 1.16  | 0.1   | 1.1    |
| 18806 | 'Pld2'     | 0     | 0.58  | 0.1  | 1.93 | 1.03 | 1.46  | 0.01 | 0     | 4.93  | 0.02   |
| 18807 | 'Pld3'     | 625.7 | 663.7 | 505  | 592  | 502  | 549   | 305  | 601.1 | 433.8 | 674.14 |
| 18810 | 'Plec'     | 1.26  | 2.09  | 4.53 | 3.33 | 2.78 | 4.48  | 4.41 | 3.77  | 1.09  | 1.89   |
| 18813 | 'Pa2g4'    | 40.57 | 43.45 | 39.8 | 26.9 | 38.4 | 36.08 | 44.1 | 43.04 | 16.07 | 42.21  |
| 18817 | 'Plk1'     | 0     | 0     | 0.37 | 0    | 0    | 0     | 2.75 | 0     | 0.58  | 0      |
| 18821 | 'Pln'      | 0.76  | 0.18  | 3.13 | 0.8  | 0.69 | 1.1   | 0.91 | 1.15  | 0.78  | 0.82   |
| 18822 | 'Plod1'    | 2.73  | 10.17 | 7.59 | 6.65 | 6.65 | 2.23  | 0    | 3.93  | 3.57  | 3.99   |
| 18823 | 'Plp1'     | 190.3 | 328.7 | 93.6 | 2.98 | 341  | 614.8 | 18.8 | 129   | 7.21  | 32.06  |
| 18824 | 'Plp2'     | 7.56  | 6.98  | 16.3 | 20.2 | 20   | 6.79  | 0.04 | 10.47 | 0     | 5.84   |
| 18826 | 'Lcp1'     | 0     | 1.31  | 0.61 | 0    | 0.01 | 7.45  | 0    | 0.01  | 0     | 0      |
| 18828 | 'Plscr2'   | 0     | 1.25  | 0.15 | 7.02 | 0    | 2.64  | 0    | 0     | 0     | 0      |
| 18829 | 'Ccl21a'   | 0     | 0     | 0    | 0    | 0.42 | 0     | 0    | 0     | 0     | 0      |
| 18830 | 'Pltp'     | 4.12  | 10.38 | 3.23 | 0    | 0.49 | 3.4   | 0    | 4.39  | 1.54  | 2.1    |
| 18844 | 'Plxna1'   | 0.89  | 5.91  | 2.04 | 9.17 | 6.68 | 3.42  | 5.54 | 3.59  | 2.5   | 2.29   |
| 18845 | 'Plxna2'   | 4.79  | 0.76  | 4.56 | 7.6  | 2.31 | 2.1   | 6.46 | 2.62  | 2.55  | 1.88   |
| 18846 | 'Plxna3'   | 1.11  | 2.82  | 2.7  | 2.75 | 0.42 | 2.18  | 4.44 | 2.84  | 7.05  | 5.44   |
| 18854 | 'Pml'      | 0     | 0.65  | 0.53 | 0.03 | 0.31 | 0     | 0    | 0     | 0     | 0      |
| 18858 | 'Pmp22'    | 5.21  | 7.05  | 0    | 1.08 | 7.79 | 26.14 | 24   | 4.29  | 4.3   | 0.03   |
| 18861 | 'Pms2'     | 5.93  | 8.63  | 3.79 | 5.65 | 14   | 1.07  | 12.5 | 8.64  | 11.83 | 6.28   |
| 18933 | 'Prrx1'    | 0     | 0.01  | 0    | 0    | 0    | 0.97  | 0.95 | 0.91  | 0.38  | 0.01   |
| 18938 | 'Ppp1r14b' | 0.35  | 4.41  | 0.05 | 5.78 | 2.34 | 3.13  | 2.04 | 5.56  | 0.05  | 1.07   |
| 18948 | 'Pnmt'     | 0.05  | 0     | 0    | 0    | 0    | 0     | 0    | 0     | 0     | 0      |
| 18949 | 'Pnn'      | 23.15 | 21.59 | 28   | 22.7 | 46.7 | 31.58 | 29.3 | 27.44 | 26.11 | 27.68  |
| 18950 | 'Pnp'      | 8.59  | 4.29  | 11   | 20.6 | 14.9 | 11.42 | 7.67 | 6.53  | 17.21 | 12.5   |
| 18951 | 'Sept5'    | 77.81 | 68.16 | 53.4 | 20.9 | 47.7 | 23.08 | 53   | 54.8  | 76.26 | 62.56  |
| 18952 | 'Sept4'    | 65.13 | 66.65 | 81.3 | 80.5 | 163  | 290.4 | 58.4 | 46.64 | 36.22 | 28.77  |
| 18968 | 'Pola1'    | 0.01  | 0.59  | 3.7  | 5.62 | 0    | 0     | 1.04 | 2.36  | 0.06  | 1.45   |
| 18969 | 'Pola2'    | 5.02  | 4.82  | 3.87 | 15.3 | 11.5 | 3.92  | 15.9 | 5.13  | 0.66  | 11.83  |
| 18970 | 'Polb'     | 83.02 | 46.72 | 50.5 | 60.9 | 73.9 | 61.35 | 96.6 | 36.6  | 43.84 | 54.39  |
| 18971 | 'Pold1'    | 2.72  | 1.15  | 0    | 0.02 | 4.05 | 2.09  | 0    | 0.43  | 2.95  | 0.01   |
| 18972 | 'Pold2'    | 5.45  | 25.01 | 25.9 | 8.69 | 22.3 | 16.03 | 56.5 | 25.28 | 50.32 | 25.76  |
| 18973 | 'Pole'     | 0     | 0.02  | 0    | 0.53 | 0    | 0     | 0    | 0.02  | 0     | 0      |
| 18974 | 'Pole2'    | 0     | 1.14  | 0.24 | 0    | 0    | 0.08  | 0.47 | 0.03  | 0     | 0      |
| 18975 | 'Polg'     | 3.39  | 4.37  | 11.5 | 0    | 6.51 | 10.02 | 5.57 | 4.24  | 2.34  | 5.65   |
| 18976 | 'Pomc'     | 149   | 109   | 53.4 | 0    | 120  | 151.3 | 227  | 57    | 116.8 | 79.5   |
| 18979 | 'Pon1'     | 0     | 0.87  | 0    | 0    | 0    | 0     | 0    | 0     | 0     | 0      |
| 18983 | 'Cnot7'    | 49.96 | 41.34 | 38.1 | 36.7 | 18.5 | 23.32 | 29.2 | 42.62 | 48.41 | 40.92  |
| 18984 | 'Por'      | 110   | 83.34 | 89.4 | 51.3 | 89.4 | 85.76 | 92.1 | 94.68 | 108   | 103.04 |
| 18985 | 'Pou2af1'  | 0.02  | 0.5   | 0    | 1.59 | 0.99 | 0.95  | 0    | 0     | 0     | 2      |
| 18986 | 'Pou2f1'   | 2.54  | 1.52  | 0.29 | 1.79 | 2.31 | 0.05  | 0.77 | 1.16  | 1.52  | 1.88   |
| 18987 | 'Pou2f2'   | 8.09  | 3.59  | 1.99 | 3.57 | 1.74 | 2.77  | 3.16 | 3.77  | 2.14  | 3.94   |
| 18991 | 'Pou3f1'   | 0     | 0     | 1.87 | 0.07 | 3.83 | 0     | 0    | 0     | 0     | 0.06   |

|       |            |       |       |      |      |      |       |      |       |       |        |
|-------|------------|-------|-------|------|------|------|-------|------|-------|-------|--------|
| 18992 | 'Pou3f2'   | 0.84  | 1.1   | 0.82 | 1.62 | 0.12 | 0.66  | 0.84 | 0.65  | 1.38  | 0.76   |
| 18993 | 'Pou3f3'   | 0.65  | 1.58  | 2.59 | 0.96 | 0.73 | 1.3   | 0.21 | 0.25  | 1.65  | 0.69   |
| 18994 | 'Pou3f4'   | 0.05  | 0.31  | 0.05 | 0    | 1.06 | 0     | 0    | 1.67  | 2.95  | 0      |
| 18996 | 'Pou4f1'   | 0     | 0     | 0    | 0    | 0.08 | 0     | 0    | 0     | 0     | 0      |
| 19009 | 'Pou6f1'   | 1.71  | 1.53  | 1.27 | 3.15 | 7.84 | 1.16  | 3.28 | 0.58  | 0.01  | 0.03   |
| 19011 | 'Endou'    | 0     | 2.27  | 0    | 0    | 0    | 0     | 0    | 0     | 0.02  | 0      |
| 19012 | 'Plpp1'    | 48.92 | 78.73 | 40.2 | 46.9 | 47.3 | 83.02 | 99.2 | 72.44 | 100.2 | 101.09 |
| 19013 | 'Ppara'    | 0     | 0     | 0    | 0.5  | 0    | 0     | 0    | 0     | 0     | 0      |
| 19014 | 'Med1'     | 8.78  | 9.8   | 11.9 | 0.78 | 8.95 | 5.66  | 4.74 | 17.98 | 8.79  | 10.89  |
| 19015 | 'Ppard'    | 0     | 0     | 0.24 | 3.46 | 0.59 | 0     | 0    | 0.65  | 0.01  | 0.55   |
| 19016 | 'Pparg'    | 0     | 0     | 0.03 | 0    | 0    | 0     | 0    | 0     | 0     | 0      |
| 19017 | 'Ppargc1a' | 2.18  | 4.79  | 3.67 | 3.02 | 1.1  | 0.02  | 3.02 | 0.12  | 0.54  | 0.84   |
| 19018 | 'Scand1'   | 15.85 | 10.7  | 12.8 | 30.9 | 11.1 | 7.58  | 7.88 | 9.5   | 14.3  | 1.43   |
| 19023 | 'Ppef2'    | 0     | 1.42  | 0.75 | 0    | 1.98 | 0     | 1.13 | 0.63  | 4.31  | 0.67   |
| 19024 | 'Ppfbp2'   | 1.93  | 1.78  | 0.86 | 5.72 | 0.15 | 1.73  | 2.39 | 0.8   | 0.88  | 4.01   |
| 19025 | 'Ctsa'     | 42.2  | 39.82 | 44.3 | 53.6 | 38.9 | 93.16 | 48.1 | 61.66 | 57.81 | 60.69  |
| 19027 | 'Sypl'     | 4.73  | 11.08 | 5.7  | 7.5  | 8.43 | 7.1   | 0.79 | 5.82  | 7.1   | 13.99  |
| 19035 | 'Ppib'     | 82.36 | 94.72 | 144  | 61.7 | 127  | 134.5 | 154  | 86.14 | 102.2 | 48.51  |
| 19039 | 'Lgals3bp' | 44.4  | 76.11 | 26.6 | 88.6 | 48.8 | 107.4 | 8.97 | 48.32 | 116.5 | 105.26 |
| 19041 | 'Ppl'      | 0     | 0     | 0    | 0    | 0.11 | 0     | 0    | 0     | 0     | 0      |
| 19042 | 'Ppm1a'    | 11.55 | 10.85 | 8.44 | 15.1 | 22.3 | 7.32  | 12   | 6.33  | 6.05  | 8.43   |
| 19043 | 'Ppm1b'    | 11.49 | 8.33  | 11.7 | 2.43 | 10.9 | 10.18 | 2.84 | 10.26 | 28.31 | 1.92   |
| 19044 | 'Ppox'     | 21.19 | 52.02 | 18.9 | 11.5 | 41   | 36.75 | 36.8 | 36.85 | 31.73 | 37.71  |
| 19045 | 'Ppp1ca'   | 240.6 | 224.1 | 246  | 303  | 190  | 313.2 | 257  | 275.1 | 190   | 256.26 |
| 19046 | 'Ppp1cb'   | 54.73 | 34.85 | 29.6 | 45.7 | 49.5 | 31.23 | 29.9 | 38.12 | 65.73 | 43.71  |
| 19047 | 'Ppp1cc'   | 12.96 | 8.09  | 10.6 | 10.2 | 17.3 | 13.22 | 24.3 | 19.29 | 24.06 | 17.52  |
| 19049 | 'Ppp1r1b'  | 12.89 | 8.32  | 3.74 | 0    | 4.43 | 26.85 | 0    | 50.65 | 16.75 | 0      |
| 19051 | 'Ppp1r17'  | 80.09 | 79.1  | 18.8 | 106  | 21.6 | 0.05  | 0.06 | 11.54 | 0.07  | 9.8    |
| 19052 | 'Ppp2ca'   | 30.65 | 29.4  | 16.5 | 73   | 48.1 | 46.31 | 31.6 | 13.56 | 10.43 | 33.64  |
| 19053 | 'Ppp2cb'   | 29.17 | 30.71 | 20.2 | 49.3 | 28.1 | 17.77 | 27.3 | 21.33 | 24.38 | 25.51  |
| 19054 | 'Ppp2r3d'  | 5.92  | 3.89  | 2.67 | 11.5 | 5.32 | 2.9   | 3.44 | 1.16  | 2.01  | 2.54   |
| 19055 | 'Ppp3ca'   | 40.6  | 58.49 | 32   | 41.9 | 58.9 | 47.73 | 41.6 | 54.85 | 19.88 | 38.18  |
| 19056 | 'Ppp3cb'   | 7.8   | 7.37  | 11.7 | 15.9 | 21.6 | 2.97  | 15.3 | 11.7  | 6.97  | 7.88   |
| 19057 | 'Ppp3cc'   | 0.07  | 4.57  | 0    | 0    | 5.29 | 6.04  | 0    | 1.54  | 7.66  | 0.52   |
| 19058 | 'Ppp3r1'   | 267   | 277.2 | 268  | 218  | 146  | 150.8 | 327  | 298.6 | 235.3 | 230.48 |
| 19059 | 'Ppp3r2'   | 2.04  | 0     | 0    | 0    | 0    | 0     | 0    | 0     | 0     | 0      |
| 19060 | 'Ppp5c'    | 92.08 | 87.55 | 103  | 83.2 | 114  | 129.4 | 117  | 119.5 | 137.6 | 136.8  |
| 19062 | 'Inpp5k'   | 21.25 | 37.51 | 23.9 | 26.4 | 28.7 | 54.15 | 15.7 | 28.27 | 30.17 | 29.3   |
| 19063 | 'Ppt1'     | 101.1 | 98.45 | 120  | 60.2 | 70.4 | 69.28 | 96.9 | 123.9 | 75.99 | 103.7  |
| 19065 | 'Npy4r'    | 0     | 2.28  | 0    | 0    | 0    | 0.02  | 0    | 0     | 0     | 0      |
| 19069 | 'Nup88'    | 99.08 | 55.67 | 55.4 | 12.7 | 70.4 | 63    | 62.1 | 86.56 | 101.5 | 78.66  |
| 19070 | 'Mob4'     | 49.55 | 48.68 | 40   | 19.2 | 43.9 | 58.29 | 57.1 | 40.91 | 34.21 | 54.23  |
| 19072 | 'Prep'     | 3.92  | 3.53  | 14.9 | 0    | 8.84 | 3.01  | 12.6 | 10.94 | 11.81 | 8.43   |
| 19073 | 'Srgn'     | 0.08  | 0.05  | 0.16 | 0.16 | 1.53 | 16.26 | 0.07 | 0     | 0.1   | 1.42   |
| 19075 | 'Prim1'    | 13.74 | 8.62  | 0.13 | 34.6 | 7.34 | 0     | 9.88 | 3.31  | 13.8  | 9.43   |
| 19076 | 'Prim2'    | 10.57 | 7.24  | 3.63 | 5.64 | 6.22 | 4.21  | 6.02 | 3.11  | 2.72  | 1.71   |
| 19079 | 'Prkab1'   | 3.16  | 19.47 | 7.93 | 8.08 | 12.5 | 11.13 | 18.4 | 7.6   | 0.99  | 6.51   |
| 19082 | 'Prkag1'   | 76.43 | 53.35 | 39.9 | 31.4 | 52.8 | 22.34 | 63.4 | 64.37 | 44.9  | 38.77  |
| 19084 | 'Prkar1a'  | 615.1 | 786.4 | 594  | 579  | 506  | 513.9 | 647  | 682.6 | 720.2 | 843.32 |
| 19085 | 'Prkar1b'  | 355.4 | 367.1 | 423  | 95.6 | 240  | 314   | 403  | 338.9 | 291.8 | 335.01 |
| 19087 | 'Prkar2a'  | 10.32 | 5.7   | 4.56 | 13.3 | 3.43 | 5.74  | 7.37 | 5.85  | 12.73 | 6.42   |
| 19088 | 'Prkar2b'  | 8     | 7.01  | 3.2  | 5.81 | 1.54 | 5.4   | 7.37 | 7.06  | 3.8   | 2.23   |
| 19089 | 'Prkcsh'   | 78.56 | 102.2 | 49.4 | 24.4 | 51.2 | 45.27 | 99.5 | 57.5  | 64.45 | 68.93  |
| 19090 | 'Prkdc'    | 1.45  | 1.6   | 4.09 | 0.75 | 0.76 | 1.92  | 5.06 | 1.16  | 3.76  | 0.68   |
| 19091 | 'Prkg1'    | 5.8   | 6.74  | 0.09 | 3.36 | 4.57 | 2.71  | 8.18 | 2.67  | 1.73  | 0.35   |
| 19092 | 'Prkg2'    | 2.04  | 0.86  | 0.42 | 0.07 | 0.07 | 0     | 0    | 1.35  | 4.89  | 0      |
| 19094 | 'Mapk11'   | 18.67 | 11.41 | 14.7 | 12.3 | 10.7 | 14.29 | 14.1 | 20.02 | 38.84 | 15.65  |
| 19099 | 'Mapk8ip1' | 9.14  | 10.78 | 12.3 | 6.57 | 11   | 9.64  | 15.7 | 6.78  | 11.33 | 9      |

|        |           |       |       |      |      |      |       |      |       |       |        |
|--------|-----------|-------|-------|------|------|------|-------|------|-------|-------|--------|
| 19106  | 'Eif2ak2' | 2.05  | 0.96  | 4.13 | 9    | 2.72 | 1.6   | 4.06 | 0.26  | 0.58  | 8.74   |
| 19108  | 'Prkx'    | 0.24  | 1.92  | 6.38 | 7.18 | 1.41 | 0     | 1.83 | 1.26  | 4.24  | 5.32   |
| 19116  | 'Prlr'    | 64.1  | 77.86 | 39.9 | 13.1 | 3.92 | 24.6  | 26.5 | 71.97 | 73.01 | 42.27  |
| 19118  | 'Prm1'    | 0     | 1.11  | 0.69 | 0    | 0    | 0     | 0    | 0.47  | 0     | 0      |
| 19122  | 'Prnp'    | 860.1 | 1149  | 690  | 840  | 716  | 846.3 | 687  | 906.4 | 765.8 | 914.56 |
| 19125  | 'Prodh'   | 6.31  | 1.45  | 0.63 | 0.02 | 2.04 | 10.56 | 2.67 | 1.31  | 8.63  | 1.36   |
| 19126  | 'Prom1'   | 2.08  | 0     | 0    | 0    | 0    | 0     | 0    | 0     | 0     | 0      |
| 19128  | 'Pros1'   | 2.44  | 6.03  | 3.13 | 9.27 | 1.23 | 8.24  | 8.22 | 2.08  | 0.62  | 0      |
| 19130  | 'Prox1'   | 2.1   | 1.32  | 2.3  | 3.45 | 0    | 0.07  | 0.01 | 0     | 0     | 0.01   |
| 19134  | 'Prpf4b'  | 9.67  | 14.66 | 14   | 12.7 | 10.3 | 9.94  | 6.15 | 14.31 | 14.09 | 13.82  |
| 19139  | 'Prps1'   | 179.7 | 195.1 | 124  | 198  | 183  | 319.4 | 177  | 178.8 | 170.6 | 138.5  |
| 19141  | 'Lgmn'    | 141.1 | 178.7 | 176  | 99.9 | 206  | 348   | 119  | 189.9 | 198.7 | 177.48 |
| 19142  | 'Prss12'  | 0     | 0     | 3.52 | 0    | 0    | 0     | 0    | 0.02  | 0.11  | 2.56   |
| 19143  | 'St14'    | 0     | 0     | 0    | 0.01 | 0    | 0     | 0    | 0     | 0     | 0.01   |
| 19144  | 'Klk6'    | 0     | 1.45  | 0    | 0    | 17.5 | 0     | 0    | 0     | 0     | 0      |
| 19152  | 'Prtn3'   | 6.47  | 8.41  | 3.44 | 8.19 | 9.14 | 5.69  | 0    | 3.05  | 6.86  | 0      |
| 19155  | 'Npepps'  | 27.2  | 15.76 | 18.7 | 28.6 | 31.1 | 20.84 | 31   | 13.04 | 24.68 | 23.16  |
| 19156  | 'Psap'    | 893.5 | 904   | 917  | 379  | 807  | 965.8 | 1115 | 817.7 | 827.8 | 741.47 |
| 19157  | 'Cyth1'   | 6.69  | 19.64 | 17.2 | 28.4 | 16.1 | 8.99  | 10.8 | 9.86  | 23.48 | 2.05   |
| 191578 | 'Helq'    | 3.03  | 2.05  | 5.82 | 10.2 | 2.69 | 1.91  | 0.17 | 1.77  | 0     | 2.49   |
| 19158  | 'Cyth2'   | 31.25 | 22.3  | 30.8 | 30.7 | 24.3 | 16.9  | 28.4 | 12.36 | 11.48 | 4.2    |
| 19159  | 'Cyth3'   | 13.02 | 9.16  | 9.9  | 8.08 | 3.96 | 4.25  | 12.8 | 6.9   | 4.99  | 7.13   |
| 19164  | 'Psen1'   | 27.51 | 23.21 | 37.6 | 21.3 | 17.8 | 22.05 | 27   | 24.88 | 33.47 | 50.73  |
| 19165  | 'Psen2'   | 30.39 | 14.17 | 28.7 | 10.9 | 25.1 | 23.68 | 22.6 | 20.03 | 34.96 | 17.13  |
| 19166  | 'Psm2'    | 396.3 | 328   | 342  | 306  | 360  | 442.1 | 240  | 419.1 | 360   | 376.96 |
| 19167  | 'Psm3'    | 281   | 246.7 | 251  | 330  | 304  | 288   | 257  | 326.7 | 251.7 | 283.89 |
| 19170  | 'Psm1'    | 415.4 | 436.5 | 390  | 466  | 347  | 397.7 | 372  | 457.1 | 401.8 | 412.66 |
| 19171  | 'Psm10'   | 56.49 | 53.78 | 96   | 98.8 | 68.6 | 113.5 | 80.3 | 80.16 | 64.57 | 89.64  |
| 19172  | 'Psm4'    | 294.8 | 302.4 | 424  | 576  | 289  | 372.1 | 279  | 303.8 | 328.7 | 295.68 |
| 19173  | 'Psm5'    | 383.5 | 269.7 | 345  | 388  | 393  | 337   | 350  | 408.5 | 311.9 | 366.24 |
| 19175  | 'Psm6'    | 441   | 393.3 | 338  | 421  | 472  | 652.2 | 364  | 488.1 | 430.7 | 478.28 |
| 19177  | 'Psm7'    | 234.3 | 297.9 | 286  | 414  | 348  | 345.3 | 340  | 387.2 | 336.1 | 306.02 |
| 19179  | 'Psmc1'   | 245.6 | 244.3 | 239  | 311  | 276  | 296.1 | 258  | 332.3 | 366.2 | 306.06 |
| 19181  | 'Psmc2'   | 152.9 | 147.9 | 174  | 206  | 119  | 181   | 138  | 139.4 | 142.4 | 165.82 |
| 19182  | 'Psmc3'   | 156.4 | 163.7 | 190  | 213  | 181  | 190.5 | 153  | 187.9 | 166.4 | 148.19 |
| 19183  | 'Psmc3ip' | 3.16  | 0     | 6.52 | 0    | 4.36 | 0.05  | 0    | 4.89  | 2.72  | 3.38   |
| 19184  | 'Psmc5'   | 354.2 | 350   | 399  | 381  | 374  | 560.3 | 349  | 461.3 | 383.9 | 401.47 |
| 19185  | 'Psm4'    | 273.7 | 237.2 | 265  | 306  | 250  | 377.2 | 289  | 253   | 216   | 276.78 |
| 19186  | 'Psm1'    | 159.6 | 156.9 | 163  | 216  | 120  | 147.5 | 182  | 124.3 | 142.3 | 207.48 |
| 19188  | 'Psm2'    | 118.6 | 114.9 | 96.9 | 304  | 134  | 188.5 | 119  | 123.4 | 106   | 147.98 |
| 19192  | 'Psm3'    | 7.61  | 3.72  | 2.74 | 32.6 | 14.7 | 16.5  | 6.06 | 18.82 | 23.71 | 8.12   |
| 19193  | 'Pipox'   | 4.75  | 4.68  | 0    | 0    | 0    | 1.76  | 0    | 0     | 9.44  | 0.87   |
| 19197  | 'Pspn'    | 4.01  | 1.81  | 5.23 | 11.7 | 0    | 0     | 3.43 | 0     | 0.82  | 2.14   |
| 19200  | 'Pstpip1' | 1.06  | 5.31  | 0    | 0    | 4.97 | 8.08  | 0    | 2.71  | 0     | 0      |
| 19201  | 'Pstpip2' | 2.41  | 0.83  | 1.63 | 14.8 | 2.45 | 0.14  | 0.02 | 5.41  | 0     | 0.02   |
| 19204  | 'Ptafr'   | 0     | 0.09  | 0.09 | 0.08 | 0.07 | 1.94  | 0.07 | 0.03  | 0.03  | 0.06   |
| 19205  | 'Ptbp1'   | 9.53  | 18.68 | 14.8 | 41.2 | 19.9 | 7.5   | 9.64 | 10.26 | 7.93  | 6.79   |
| 19206  | 'Ptch1'   | 6.41  | 0.48  | 0.46 | 18.4 | 0.1  | 4.06  | 1.42 | 2.48  | 2.8   | 0.1    |
| 19207  | 'Ptch2'   | 2.11  | 0.35  | 2.43 | 0    | 0    | 0     | 0    | 0.62  | 1.62  | 0      |
| 19208  | 'Ptcr1'   | 0.57  | 4.26  | 0.6  | 1.25 | 1.06 | 2.8   | 1.37 | 1.19  | 0.7   | 3.82   |
| 19210  | 'Ptdss1'  | 38.82 | 30.48 | 37.6 | 35.1 | 34.2 | 37.04 | 82.6 | 44.71 | 49.96 | 46.18  |
| 19211  | 'Pten'    | 2.08  | 2.28  | 1.02 | 4.92 | 2.73 | 2.59  | 1.84 | 1.47  | 0.5   | 1.52   |
| 192119 | 'Dicer1'  | 0.73  | 1.66  | 0.31 | 6.05 | 2.73 | 0.46  | 0.63 | 1.21  | 0.96  | 0.53   |
| 19212  | 'Pter'    | 0.14  | 2.3   | 1.41 | 2.38 | 0.27 | 1.25  | 0.16 | 0.12  | 3.21  | 0      |
| 192120 | 'Bspry'   | 0.66  | 0     | 0    | 0    | 0    | 0     | 0    | 0     | 0     | 0      |
| 192136 | 'Sugct'   | 0     | 3.13  | 7.28 | 0    | 4.62 | 0     | 7.19 | 0     | 3.22  | 0      |
| 19214  | 'Ptgdr'   | 0     | 0     | 0.31 | 0    | 0    | 0     | 0    | 0     | 0     | 0      |
| 192140 | 'Tmc2'    | 0.02  | 0.45  | 0    | 0.02 | 0.01 | 0     | 0.04 | 0.01  | 0.01  | 0.01   |

|        |            |       |       |      |      |      |       |      |       |       |         |
|--------|------------|-------|-------|------|------|------|-------|------|-------|-------|---------|
| 19215  | 'Ptgds'    | 175.3 | 194   | 11.1 | 12.8 | 62.7 | 738.6 | 22.7 | 27.55 | 95.88 | 35.16   |
| 192156 | 'Mvd'      | 5.72  | 19.9  | 24.5 | 32.5 | 12.4 | 44.14 | 18.7 | 19.45 | 9.88  | 7.53    |
| 192157 | 'Socs7'    | 2.75  | 2.46  | 1.7  | 5.26 | 3.74 | 0.49  | 1.83 | 1.66  | 1.56  | 0.44    |
| 192159 | 'Prpf8'    | 7.24  | 6.55  | 11.2 | 6.32 | 3.46 | 1.81  | 11   | 5.71  | 2.83  | 9.63    |
| 19216  | 'Ptger1'   | 0     | 0     | 0    | 0    | 0    | 1.8   | 0    | 0     | 0     | 0       |
| 192160 | 'Casc3'    | 7.22  | 4.34  | 5.06 | 16.9 | 3.16 | 6.13  | 4.71 | 5.74  | 14.01 | 3.6     |
| 192161 | 'Pcdha9'   | 0.66  | 5.83  | 1.99 | 0.02 | 2.16 | 0     | 1.22 | 0.93  | 3.6   | 2.53    |
| 192163 | 'Pcdha3'   | 1.34  | 0.67  | 2.18 | 0    | 0.02 | 0     | 3.68 | 0.66  | 0.74  | 3.86    |
| 192164 | 'Pcdha12'  | 10.15 | 2.05  | 2.16 | 0    | 0    | 7.29  | 4.03 | 1.49  | 4.17  | 2.7     |
| 192166 | 'Sardh'    | 1.29  | 0     | 2.35 | 0    | 1.16 | 0     | 0    | 0     | 3.52  | 0       |
| 192167 | 'Nlgn1'    | 8.23  | 11.26 | 12.3 | 7.71 | 18.1 | 14.51 | 20.4 | 9.9   | 12.74 | 9.79    |
| 192169 | 'Ufsp2'    | 51.61 | 53.79 | 63   | 37.8 | 41.9 | 63.92 | 48.3 | 78.66 | 41.78 | 58.56   |
| 19217  | 'Ptger2'   | 0.15  | 0     | 0.4  | 0    | 0    | 2.09  | 3.03 | 0.21  | 1.48  | 0       |
| 192170 | 'Eif4a3'   | 61.91 | 78.9  | 73.9 | 71.6 | 64.8 | 47.9  | 51.5 | 96.37 | 83.37 | 62.37   |
| 192173 | 'Mcrip1'   | 132.3 | 110.6 | 186  | 272  | 134  | 171.1 | 190  | 144.5 | 257.8 | 107.71  |
| 192174 | 'Rwdd4a'   | 7.89  | 10.05 | 6.93 | 19.5 | 3.39 | 9.06  | 7.55 | 9.99  | 7.58  | 8.56    |
| 192176 | 'Flna'     | 1.87  | 3.41  | 6.61 | 4.74 | 2.34 | 1.37  | 8.9  | 4.08  | 3.1   | 6.4     |
| 19218  | 'Ptger3'   | 1.14  | 1.63  | 1.07 | 0.03 | 0.33 | 19.02 | 2.94 | 0     | 2.95  | 11.84   |
| 192185 | 'Nadk'     | 17.39 | 14.27 | 11   | 20.4 | 6.32 | 16.51 | 16.8 | 34.84 | 11.81 | 15.3    |
| 192187 | 'Stab1'    | 0     | 0     | 0.01 | 0    | 0    | 0.84  | 0    | 0     | 0     | 0       |
| 192188 | 'Stab2'    | 0     | 0.59  | 0    | 0    | 0    | 0     | 0.01 | 0.12  | 0     | 0       |
| 19219  | 'Ptger4'   | 0     | 1.37  | 0    | 0    | 0.13 | 0     | 1    | 1.92  | 0.15  | 4.83    |
| 192190 | 'Pkhd111'  | 0.21  | 0     | 0    | 0    | 0.01 | 0     | 0    | 0     | 0     | 0.02    |
| 192191 | 'Med9'     | 16.71 | 23.6  | 15.1 | 11.1 | 16.7 | 9.5   | 22.6 | 24.25 | 16.58 | 21.23   |
| 192192 | 'Shkbp1'   | 3.98  | 9.26  | 7.21 | 2.98 | 9.91 | 16.93 | 5.16 | 7.18  | 5.22  | 10.39   |
| 192193 | 'Edem1'    | 0.24  | 1.04  | 0.5  | 0.12 | 0.69 | 0.2   | 1.41 | 0.97  | 0.09  | 0.27    |
| 192194 | 'Btl10'    | 0.01  | 0     | 0    | 0.98 | 0.01 | 0     | 0    | 0.01  | 0     | 0       |
| 192195 | 'Ash1l'    | 5.09  | 3.54  | 3.93 | 15.7 | 6.99 | 6     | 6.99 | 5.94  | 4.93  | 7.3     |
| 192196 | 'Luc7l2'   | 12.18 | 12.23 | 17.7 | 11.6 | 12.6 | 9.85  | 9.88 | 7.33  | 13.56 | 11.87   |
| 192197 | 'Bcas3'    | 14.97 | 12.8  | 17.3 | 33.2 | 12.8 | 18.11 | 21   | 6.1   | 19.47 | 17.36   |
| 192198 | 'Lrrc4'    | 3.45  | 0.58  | 3.92 | 1.35 | 4.03 | 1.89  | 0    | 7.43  | 2.88  | 0.78    |
| 192199 | 'Rspo1'    | 3.52  | 2.42  | 1.5  | 0.87 | 4.94 | 13.21 | 5.57 | 9.3   | 3.01  | 0.31    |
| 19220  | 'Ptgfr'    | 19.8  | 0     | 0    |      | 40.4 | 70.4  | 31.8 | 0     | 21    | 55.4    |
| 19221  | 'Ptgfrn'   | 0     | 0     | 0.01 | 0    | 0.01 | 0.48  | 0    | 0     | 0     | 0       |
| 192212 | 'Prom2'    | 0     | 0.03  | 0    | 0    | 0    | 0     | 0    | 0     | 0     | 0       |
| 192216 | 'Tmem47'   | 21.68 | 40.81 | 17   | 27   | 24.9 | 9.24  | 26.5 | 19.07 | 19.31 | 41.02   |
| 19222  | 'Ptgir'    | 0     | 0     | 0.01 | 0    | 0    | 0.01  | 1.16 | 0     | 0     | 0       |
| 19223  | 'Ptgis'    | 0     | 3.73  | 0.28 | 0    | 0    | 0.08  | 0    | 2.49  | 5.82  | 1.79    |
| 192231 | 'Hexim1'   | 5.83  | 6.91  | 3.31 | 0.81 | 2.89 | 9.05  | 7.93 | 13.64 | 5.47  | 9.02    |
| 192232 | 'Hps4'     | 0.8   | 4.54  | 8.3  | 7.36 | 8.99 | 9.85  | 7.79 | 8.39  | 3.85  | 5.74    |
| 192236 | 'Hps1'     | 8.61  | 7.83  | 5.75 | 12.4 | 7.96 | 4.67  | 0.01 | 10.04 | 6.07  | 8.5     |
| 19224  | 'Ptgs1'    | 2.4   | 0     | 0    | 5.59 | 0.02 | 33.59 | 5.63 | 5.65  | 0.03  | 0       |
| 19225  | 'Ptgs2'    | 0     | 0     | 0.13 | 0    | 0    | 0     | 0    | 0     | 0     | 0       |
| 19227  | 'Pthlh'    | 6.31  | 3.01  | 1.76 | 0    | 0    | 0     | 0    | 1.84  | 0     | 5.08    |
| 19228  | 'Pth1r'    | 4.28  | 3.31  | 7.15 | 0    | 7.39 | 6.19  | 0.27 | 4.98  | 3.54  | 8.38    |
| 192285 | 'Phf21a'   | 9.15  | 4.33  | 3.88 | 4.58 | 4.65 | 6.66  | 6.41 | 6.46  | 3.91  | 7.14    |
| 192287 | 'Slc25a36' | 15.87 | 17.09 | 25.3 | 15.4 | 23   | 15.55 | 23.1 | 24.92 | 25.61 | 24.9    |
| 192289 | 'Tmlhe'    | 0     | 0.26  | 0.02 | 0    | 0.89 | 0.38  | 0    | 0.89  | 0     | 0       |
| 19229  | 'Ptk2b'    | 3.44  | 5.72  | 30.5 | 55.7 | 5.29 | 5.5   | 2.61 | 5.52  | 15.82 | 32.22   |
| 192292 | 'Nrpb1'    | 82.13 | 96.86 | 102  | 95.1 | 60.2 | 88.08 | 80.6 | 60.53 | 110.2 | 99.96   |
| 19230  | 'Twf1'     | 48.2  | 52.25 | 36.3 | 47.9 | 52.1 | 36.57 | 22.8 | 45.88 | 50.87 | 49      |
| 19231  | 'Ptma'     | 144.1 | 207.7 | 153  | 214  | 147  | 122.9 | 211  | 120.5 | 130.5 | 202.28  |
| 19240  | 'Tmsb10'   | 1434  | 1278  | 1202 | 1591 | 1207 | 1274  | 1200 | 1119  | 1438  | 1195.29 |
| 19241  | 'Tmsb4x'   | 1477  | 1679  | 1307 | 1966 | 1937 | 2059  | 1765 | 1458  | 1226  | 1461.94 |
| 19242  | 'Ptn'      | 52.2  | 74.98 | 120  | 61.9 | 82.3 | 54.95 | 141  | 54.3  | 124.9 | 68.59   |
| 19243  | 'Ptp4a1'   | 62.33 | 94.83 | 57.3 | 158  | 26.1 | 22.44 | 41.9 | 36.49 | 30.77 | 12.57   |
| 19244  | 'Ptp4a2'   | 56.04 | 55.61 | 49.9 | 50.6 | 59.4 | 52.16 | 39   | 39.71 | 30.56 | 37.2    |
| 19245  | 'Ptp4a3'   | 21.57 | 13.9  | 20.8 | 13.5 | 21.3 | 16.9  | 2.92 | 13.16 | 11.97 | 23.23   |

|        |           |       |       |      |      |      |       |      |       |       |        |
|--------|-----------|-------|-------|------|------|------|-------|------|-------|-------|--------|
| 19246  | 'Ptpn1'   | 7.31  | 5.35  | 11.5 | 20.7 | 6.78 | 6.22  | 9.83 | 7.52  | 3.71  | 8.71   |
| 19247  | 'Ptpn11'  | 11.63 | 10.07 | 19.9 | 10.9 | 21.6 | 10.75 | 18.5 | 6.55  | 22.95 | 9.27   |
| 19248  | 'Ptpn12'  | 4.22  | 4.4   | 2.45 | 1.92 | 10.1 | 0.19  | 0.15 | 1.34  | 3.92  | 1.18   |
| 19249  | 'Ptpn13'  | 1.26  | 0.22  | 0.01 | 0.05 | 1.77 | 0.11  | 0    | 0.01  | 0     | 0      |
| 19250  | 'Ptpn14'  | 0     | 0     | 0.01 | 3.27 | 0.02 | 0     | 0    | 0     | 0     | 0      |
| 19252  | 'Dusp1'   | 78.91 | 222.2 | 290  | 534  | 121  | 371.9 | 81.2 | 87.2  | 68.22 | 266.95 |
| 19253  | 'Ptpn18'  | 0.06  | 0     | 0    | 4    | 0    | 1.71  | 2.52 | 0     | 0.03  | 0.03   |
| 19255  | 'Ptpn2'   | 20.63 | 11.31 | 15.4 | 5.28 | 13.6 | 15.81 | 21.1 | 17.33 | 22.44 | 35.51  |
| 19256  | 'Ptpn20'  | 0     | 0     | 0    | 0    | 0    | 0.79  | 0    | 0     | 0     | 3.52   |
| 19258  | 'Ptpn4'   | 5.75  | 0.91  | 3.24 | 1.62 | 1.76 | 1.19  | 0.09 | 1.96  | 4.61  | 1.35   |
| 19259  | 'Ptpn5'   | 89.15 | 119.2 | 80   | 141  | 51.6 | 53.78 | 103  | 98.05 | 96.12 | 69.9   |
| 19260  | 'Ptpn22'  | 0     | 0     | 0    | 0.02 | 0    | 0     | 5.59 | 0     | 0     | 0      |
| 19261  | 'Sirpa'   | 33.83 | 19.41 | 15.1 | 11.4 | 24.7 | 23.99 | 23.5 | 24.42 | 22.12 | 21.27  |
| 19262  | 'Ptpna'   | 18.17 | 24.3  | 20.5 | 40.5 | 9    | 23.29 | 33   | 18.52 | 19.98 | 16.6   |
| 19263  | 'Ptpnb'   | 0.03  | 0     | 0.78 | 0.33 | 0    | 0     | 0    | 0     | 0.41  | 0.47   |
| 192650 | 'Cabp7'   | 0     | 0     | 0    | 0    | 0.98 | 0     | 0    | 0     | 0     | 0      |
| 192651 | 'Zfp286'  | 8.32  | 7.36  | 7.28 | 7.76 | 4.44 | 12.3  | 3.97 | 5.97  | 7.91  | 3.41   |
| 192652 | 'Wdr81'   | 1.03  | 0.88  | 2.98 | 2.31 | 0.52 | 3.43  | 0    | 2.15  | 0.87  | 0.67   |
| 192653 | 'Ttc36'   | 0.68  | 0.93  | 0    | 1.83 | 0    | 0     | 0    | 0.06  | 0     | 0.18   |
| 192654 | 'Pla2g15' | 13.84 | 7.57  | 19.5 | 14.3 | 0.34 | 17.49 | 0.02 | 9.86  | 1.12  | 23.28  |
| 192656 | 'Ripk2'   | 0.1   | 0.32  | 0    | 0    | 0    | 4.65  | 0    | 0.04  | 0.09  | 0      |
| 192657 | 'Eil2'    | 0     | 2.74  | 0.61 | 1.34 | 1.98 | 1.24  | 2.8  | 0     | 0.35  | 0      |
| 192658 | 'Rfpl4'   | 0     | 0.37  | 0.1  | 0    | 0    | 0     | 0    | 0     | 0     | 0.06   |
| 19266  | 'Ptprd'   | 13.94 | 4.32  | 2.82 | 0.88 | 10.3 | 5.11  | 8.74 | 6.47  | 6.49  | 6.06   |
| 192662 | 'Arhgdia' | 155.9 | 152.4 | 195  | 112  | 210  | 149.5 | 249  | 140.7 | 150   | 166.06 |
| 192663 | 'Abcg4'   | 8.73  | 15.71 | 30.9 | 5.06 | 16.6 | 2.9   | 9.86 | 24.32 | 10.31 | 6.86   |
| 19267  | 'Ptpra'   | 3.43  | 3.52  | 2.73 | 4.79 | 5.41 | 8.37  | 12   | 4.37  | 9.65  | 1.07   |
| 192678 | 'Rassf3'  | 0.01  | 0     | 0    | 0.02 | 0.36 | 0.36  | 0    | 0     | 1.61  | 0.01   |
| 19268  | 'Ptprf'   | 10.9  | 10.94 | 8.24 | 10.9 | 9.45 | 5.59  | 8.1  | 10.07 | 8.26  | 4.55   |
| 19270  | 'Ptprg'   | 0.57  | 3.12  | 3.8  | 6.54 | 2.5  | 0.02  | 2.48 | 1.89  | 0     | 0.36   |
| 19271  | 'Ptprj'   | 0.85  | 1.49  | 2.3  | 1.32 | 2.32 | 0.56  | 3.66 | 1.53  | 1.4   | 0.98   |
| 19272  | 'Ptprk'   | 8.66  | 5.05  | 2.12 | 0.78 | 11   | 3.6   | 7.53 | 8.46  | 0.29  | 12.23  |
| 19273  | 'Ptpru'   | 3.69  | 2.77  | 8.96 | 1.96 | 1.24 | 0.89  | 8.62 | 0.78  | 7.28  | 2.69   |
| 192734 | 'Lrrc75b' | 1.87  | 2.16  | 2.41 | 0.07 | 1.47 | 5.26  | 4.79 | 0.62  | 6.65  | 3.98   |
| 19274  | 'Ptprm'   | 7.66  | 3.36  | 16.6 | 8.33 | 2.27 | 5.35  | 6.35 | 6.04  | 5.3   | 12.76  |
| 19275  | 'Ptprn'   | 48.79 | 69.76 | 54.3 | 157  | 66.6 | 58.15 | 36.9 | 53.72 | 86.54 | 93.07  |
| 19276  | 'Ptprn2'  | 15.85 | 11.98 | 14.3 | 9.27 | 18.8 | 11.39 | 4.68 | 17.22 | 30.32 | 18.31  |
| 19277  | 'Ptpro'   | 26.78 | 34.28 | 16.8 | 13.5 | 11.5 | 4.49  | 12.5 | 20.64 | 3.75  | 20.19  |
| 192775 | 'Kcnh6'   | 19.67 | 21.06 | 42.9 | 42.3 | 21.1 | 56.48 | 31.9 | 14.21 | 47.11 | 36.01  |
| 192786 | 'Rapgef6' | 14.01 | 10.43 | 3.6  | 25.9 | 7.56 | 8.45  | 7.67 | 11.48 | 11.52 | 16.59  |
| 19279  | 'Ptprp'   | 14.99 | 11.21 | 49.4 | 70.9 | 16.9 | 5.49  | 0.14 | 16.29 | 5.35  | 3.1    |
| 19280  | 'Ptprs'   | 34.49 | 30.29 | 61.5 | 18.5 | 53.8 | 20.16 | 45.9 | 42.88 | 49.02 | 54.03  |
| 19281  | 'Ptprt'   | 0.5   | 0.93  | 2.78 | 1.41 | 1.42 | 4.47  | 2.13 | 0.99  | 4.18  | 2.36   |
| 19283  | 'Ptprz1'  | 18.22 | 11.57 | 27.1 | 19.8 | 3.89 | 7.11  | 24.4 | 8.28  | 25.27 | 8.82   |
| 19285  | 'Cavin1'  | 1.34  | 3.1   | 0    | 4.39 | 0.74 | 0     | 0    | 0     | 0.01  | 0      |
| 192852 | 'Lrrc3c'  | 0     | 0     | 0    | 0    | 0    | 0.05  | 0    | 0     | 0     | 0      |
| 19286  | 'Pts'     | 77.89 | 99.31 | 61.9 | 76.7 | 74.7 | 65.82 | 61.4 | 72.02 | 101.4 | 61.09  |
| 19288  | 'Ptx3'    | 0     | 0     | 0    | 0    | 0    | 0     | 0    | 1.17  | 0     | 0      |
| 19289  | 'Igdcc3'  | 1.97  | 0     | 0    | 0    | 0    | 0     | 0    | 0     | 0     | 0      |
| 192897 | 'Itgb4'   | 1.94  | 0.95  | 0.01 | 0.04 | 0.72 | 0.01  | 0.39 | 0     | 0.03  | 0.08   |
| 19290  | 'Pura'    | 15.24 | 10.18 | 12.1 | 12.9 | 26.2 | 12.74 | 14.1 | 17.94 | 11.77 | 12.45  |
| 19291  | 'Purb'    | 6.34  | 6.74  | 8.55 | 9.71 | 5.64 | 6.42  | 14.1 | 4.56  | 4.29  | 5.73   |
| 19293  | 'Pvalb'   | 5.28  | 0     | 71.7 | 0.07 | 6.26 | 8.7   | 0    | 0.05  | 0.06  | 5.09   |
| 19294  | 'Nectin2' | 13.87 | 11.79 | 18   | 7.9  | 14   | 28.88 | 23.3 | 8.33  | 13.11 | 14.27  |
| 192950 | 'Nacad'   | 8.98  | 12.59 | 16.7 | 2.53 | 10.2 | 19.45 | 12.3 | 10.57 | 14.17 | 15.78  |
| 192970 | 'Dhrs11'  | 2.24  | 1.96  | 13.3 | 0    | 2.4  | 0.07  | 10.5 | 5.27  | 5.48  | 1.16   |
| 192976 | 'Lrrc75a' | 0     | 1.72  | 0    | 0    | 4.11 | 9.03  | 7.26 | 0.02  | 1.47  | 2.41   |
| 19298  | 'Pex19'   | 28.3  | 41.87 | 45.9 | 31.2 | 55.4 | 32.88 | 41.9 | 49.97 | 32.57 | 28.91  |

|        |            |       |       |      |      |      |       |      |       |       |        |
|--------|------------|-------|-------|------|------|------|-------|------|-------|-------|--------|
| 192986 | 'Cyb5d2'   | 13.22 | 8.64  | 2.66 | 9.22 | 7.62 | 4.05  | 19.1 | 11.29 | 21.65 | 15.59  |
| 19299  | 'Abcd3'    | 28.85 | 26.66 | 36.2 | 18.3 | 14.9 | 6.23  | 48.2 | 23.16 | 27.25 | 19.28  |
| 19300  | 'Abcd4'    | 6     | 7.03  | 7.86 | 14.7 | 11.8 | 15.45 | 5.77 | 1.09  | 5.36  | 15.75  |
| 193003 | 'Pirt'     | 0     | 0     | 0    | 0    | 8.14 | 0.01  | 0    | 0     | 0     | 0      |
| 19301  | 'Pxmp2'    | 5.41  | 10.95 | 3.19 | 1.24 | 0.07 | 8.11  | 0.07 | 2.65  | 0.22  | 0.12   |
| 19302  | 'Pex2'     | 16.56 | 24.32 | 22   | 6.86 | 18.2 | 12.77 | 14.3 | 25.64 | 18.97 | 13.96  |
| 19303  | 'Pxn'      | 0     | 0.73  | 2.64 | 1.95 | 1.14 | 0.02  | 4.93 | 2.24  | 1.46  | 0.51   |
| 193043 | 'Zfp3'     | 0.75  | 0.03  | 5.91 | 7.51 | 17.7 | 16.09 | 22.4 | 8.02  | 6.69  | 19.15  |
| 19305  | 'Pex5'     | 16.7  | 18.35 | 16.7 | 51.4 | 21   | 27.09 | 10   | 34.63 | 11.61 | 28.24  |
| 19309  | 'Pygm'     | 3.44  | 12.3  | 12.7 | 7.26 | 9.17 | 19.79 | 5.79 | 10.13 | 8.92  | 5.76   |
| 193116 | 'Slu7'     | 26.67 | 18.34 | 33.3 | 24.7 | 40.5 | 25.11 | 20.2 | 19.33 | 9.2   | 33.22  |
| 19317  | 'Qk'       | 14.22 | 23.68 | 16.2 | 17.4 | 14.1 | 13.95 | 13.5 | 3.52  | 3.19  | 6.09   |
| 19324  | 'Rab1a'    | 128.1 | 125.7 | 122  | 182  | 102  | 146   | 170  | 132.2 | 141.9 | 120.65 |
| 19325  | 'Rab10'    | 10.1  | 6.56  | 7.24 | 14.6 | 7.2  | 7.71  | 8.05 | 10.74 | 15.22 | 7.21   |
| 19326  | 'Rab11b'   | 233.2 | 236.3 | 268  | 205  | 244  | 236.7 | 204  | 314.5 | 276   | 293.49 |
| 19328  | 'Rab12'    | 6.04  | 8.87  | 11.3 | 22   | 7.66 | 5.91  | 17.1 | 6.39  | 4.39  | 6.24   |
| 193286 | 'BC049762' | 0     | 0.21  | 1.1  | 0    | 0.07 | 0     | 0    | 0.05  | 0     | 3.62   |
| 19330  | 'Rab18'    | 84.06 | 86.07 | 86.2 | 78.1 | 80.7 | 41    | 57.3 | 71.94 | 81.05 | 56.91  |
| 19331  | 'Rab19'    | 0     | 0     | 0    | 0    | 0    | 0     | 0    | 0     | 0     | 6.29   |
| 19332  | 'Rab20'    | 0     | 0     | 3.38 | 0.05 | 0    | 0.07  | 0    | 0     | 4.2   | 0.03   |
| 19334  | 'Rab22a'   | 1.27  | 3.96  | 0.73 | 0.6  | 6.65 | 0.07  | 8.47 | 1.43  | 13.61 | 2.87   |
| 19335  | 'Rab23'    | 5.59  | 10.43 | 4.59 | 6.65 | 2.74 | 2.66  | 16.7 | 6.47  | 5.24  | 2.39   |
| 19336  | 'Rab24'    | 7.12  | 10.34 | 7.11 | 85.4 | 13.3 | 13.92 | 34.7 | 16.71 | 54.85 | 9.02   |
| 19337  | 'Rab33a'   | 35.06 | 43.74 | 25.1 | 54.4 | 12.3 | 20.81 | 19.1 | 21.9  | 13.82 | 18.72  |
| 19338  | 'Rab33b'   | 24.3  | 20.54 | 16.8 | 29.1 | 14.8 | 13.98 | 27.1 | 25.02 | 20.81 | 15.24  |
| 193385 | 'Ripor2'   | 7.71  | 6.19  | 11.4 | 2.74 | 7.28 | 5.5   | 2.65 | 7.6   | 10.65 | 5.59   |
| 19339  | 'Rab3a'    | 948.3 | 796.3 | 1081 | 903  | 836  | 959.8 | 945  | 1124  | 846.9 | 878.72 |
| 19340  | 'Rab3d'    | 3.38  | 1.36  | 2.46 | 0    | 2.55 | 0.31  | 0    | 3.87  | 0     | 0      |
| 19341  | 'Rab4a'    | 78.11 | 96.85 | 77   | 84.8 | 61.6 | 67.11 | 81.5 | 76.16 | 74.15 | 56.45  |
| 19342  | 'Rab4b'    | 107.9 | 98.78 | 138  | 101  | 104  | 110.1 | 97.2 | 189.6 | 138.9 | 166.06 |
| 19344  | 'Rab5b'    | 32.43 | 42.89 | 50.6 | 20.4 | 49.3 | 40.12 | 26.8 | 42.06 | 58.12 | 27.91  |
| 19345  | 'Rab5c'    | 58.71 | 40.11 | 65   | 36.5 | 58.1 | 76.59 | 72.1 | 59.56 | 76    | 64.56  |
| 193452 | 'Zfp184'   | 0     | 3.72  | 0    | 9.16 | 2.01 | 2.96  | 5.29 | 3.05  | 2.32  | 4.76   |
| 19346  | 'Rab6a'    | 162.9 | 199.4 | 195  | 207  | 126  | 110.4 | 218  | 106.7 | 218.9 | 52.02  |
| 19347  | 'Dennd5a'  | 7.81  | 13.65 | 4.55 | 8.81 | 15.2 | 5.81  | 5.76 | 6.84  | 5.96  | 7.17   |
| 19348  | 'Kif20a'   | 0.01  | 0.1   | 0.03 | 0.03 | 0.05 | 0.07  | 0    | 0     | 2.28  | 0.89   |
| 19349  | 'Rab7'     | 247.6 | 238.3 | 258  | 287  | 237  | 266.6 | 251  | 309.2 | 242.9 | 291.02 |
| 19352  | 'Rabggtb'  | 59.84 | 61.65 | 54.6 | 99   | 73   | 60.03 | 47.2 | 62.91 | 61.73 | 51.96  |
| 19353  | 'Rac1'     | 51.27 | 29.12 | 38   | 184  | 58.7 | 14.88 | 57.9 | 19.75 | 34.48 | 16.18  |
| 19354  | 'Rac2'     | 2.11  | 0.06  | 0.06 | 3.52 | 1.47 | 0.02  | 0.45 | 0.09  | 0.08  | 0.04   |
| 19355  | 'Rad1'     | 24.2  | 10.62 | 4.8  | 7.99 | 19.8 | 13.45 | 12.7 | 26.83 | 35.12 | 16.44  |
| 19356  | 'Rad17'    | 12.51 | 12.48 | 6.6  | 5.78 | 11.2 | 2.2   | 5.26 | 8.01  | 3.17  | 6.02   |
| 19357  | 'Rad21'    | 7.25  | 7.73  | 5.46 | 11.5 | 4.07 | 8.5   | 0.12 | 8.21  | 1.85  | 3.33   |
| 19358  | 'Rad23a'   | 77.32 | 69.71 | 61.8 | 98.4 | 80.2 | 87.94 | 74.2 | 85.09 | 63.82 | 78.89  |
| 19359  | 'Rad23b'   | 4.86  | 13.67 | 9.02 | 17.7 | 9.39 | 1.89  | 12.2 | 10.9  | 16.12 | 5.65   |
| 19360  | 'Rad50'    | 3.69  | 1.36  | 1.73 | 8.63 | 1.55 | 8.16  | 2.58 | 3.8   | 5.55  | 2.89   |
| 19361  | 'Rad51'    | 7.31  | 5.03  | 1.37 | 0    | 11.7 | 4.16  | 0    | 5.99  | 0.02  | 0      |
| 19362  | 'Rad51ap1' | 0.05  | 0.51  | 0    | 0    | 7.51 | 0     | 5.61 | 0     | 0.61  | 2.26   |
| 19363  | 'Rad51b'   | 0     | 3.29  | 0    | 0    | 0    | 0.05  | 0    | 0     | 0.04  | 0      |
| 19364  | 'Rad51d'   | 23.93 | 17.69 | 12.7 | 5.89 | 28.2 | 8.09  | 29.1 | 22.73 | 22.87 | 12.58  |
| 19365  | 'Rad52'    | 13.92 | 8.47  | 10   | 14.6 | 11.5 | 1.26  | 3.46 | 2.78  | 11.69 | 4.48   |
| 19366  | 'Rad54l'   | 0     | 0.2   | 0.13 | 0    | 0.87 | 2.13  | 0    | 0.05  | 0.39  | 0      |
| 19367  | 'Rad9a'    | 13.62 | 20.11 | 6.82 | 11.9 | 20   | 19.25 | 7.43 | 19.3  | 13.36 | 13.5   |
| 193670 | 'Rnf185'   | 20.29 | 27.8  | 8.31 | 32.1 | 11.1 | 5.71  | 38.8 | 12.12 | 14.74 | 27.91  |
| 19373  | 'Rag1'     | 0     | 0     | 0    | 0    | 0    | 0     | 0    | 0     | 0.01  | 0.27   |
| 193736 | 'Zbtb12'   | 0     | 0     | 0    | 0    | 0    | 1.98  | 0    | 0.2   | 2.07  | 0.4    |
| 19374  | 'Rag2'     | 0     | 0     | 0    | 0    | 0.01 | 0     | 0    | 0     | 0     | 0      |
| 193740 | 'Hspa1a'   | 11.04 | 80.67 | 77.7 | 40.7 | 18.6 | 59.05 | 5.2  | 13.56 | 30.64 | 24.88  |



|        |                 |       |       |      |      |      |       |      |       |       |        |
|--------|-----------------|-------|-------|------|------|------|-------|------|-------|-------|--------|
| 193742 | 'Abhd16a'       | 90.84 | 98.15 | 118  | 61.7 | 83.5 | 108.2 | 159  | 135.1 | 102.2 | 105.49 |
| 19376  | 'Rab34'         | 20.07 | 12.98 | 18.9 | 16.9 | 17.2 | 15.41 | 60.6 | 26.13 | 16.43 | 19.79  |
| 19377  | 'Rai1'          | 2.57  | 2.37  | 3.99 | 2.84 | 1.55 | 4.27  | 4.45 | 4.6   | 1.58  | 3.57   |
| 19378  | 'Aldh1a2'       | 0     | 0     | 0    | 0    | 0    | 0     | 0    | 0     | 0.02  | 0      |
| 193796 | 'Kdm4b'         | 2.88  | 3.67  | 1.82 | 4.35 | 5.29 | 1.18  | 0.19 | 1.15  | 2.99  | 0.72   |
| 193813 | 'Mcf2'          | 261.8 | 242.4 | 138  | 218  | 148  | 280.1 | 173  | 184.8 | 262.8 | 263.49 |
| 19383  | 'Raly'          | 21.43 | 24.41 | 32.4 | 41.9 | 25.5 | 53.33 | 48.1 | 51    | 44.54 | 46.5   |
| 193838 | 'Eme2'          | 30.14 | 37.46 | 35.5 | 48.8 | 39.8 | 25.08 | 49.8 | 34.22 | 50.85 | 40.37  |
| 19384  | 'Ran'           | 315.2 | 291.5 | 264  | 247  | 221  | 303.6 | 324  | 280.2 | 234.3 | 316.65 |
| 19385  | 'Ranbp1'        | 228.7 | 168.7 | 237  | 249  | 186  | 280.2 | 233  | 228.2 | 157   | 136.63 |
| 19386  | 'Ranbp2'        | 1.7   | 2.11  | 1.89 | 3.56 | 0.37 | 0.28  | 0.55 | 0.91  | 1.73  | 2.99   |
| 19387  | 'Rangap1'       | 162.2 | 170.1 | 123  | 72.9 | 81   | 132.6 | 119  | 131.5 | 106.8 | 158.62 |
| 19395  | 'Rasgrp2'       | 12.81 | 7.03  | 19.2 | 31.3 | 10.8 | 20.98 | 11.1 | 19.22 | 23.7  | 1.69   |
| 19400  | 'Rapsn'         | 0     | 0     | 0    | 0    | 0.15 | 0     | 0    | 0     | 0     | 0.11   |
| 19401  | 'Rara'          | 4.24  | 1.65  | 1.45 | 0.15 | 1.75 | 0     | 0    | 2.29  | 2.37  | 2.21   |
| 19411  | 'Rarg'          | 0     | 0.33  | 3.48 | 8.56 | 3.36 | 0.12  | 2.24 | 0.04  | 1.07  | 0      |
| 194126 | 'Mtnr11'        | 4.06  | 4.11  | 8.97 | 7.11 | 4.22 | 0     | 1.64 | 5.87  | 4     | 2.08   |
| 19414  | 'Rasa3'         | 4.73  | 19.22 | 15.9 | 12.2 | 13.3 | 2.48  | 28.5 | 17.08 | 3.78  | 9.29   |
| 19415  | 'Rasal1'        | 8.99  | 45.69 | 12   | 2.75 | 8.92 | 11.26 | 0.99 | 17.82 | 1.97  | 0.92   |
| 19416  | 'Rasd1'         | 25.65 | 47.57 | 43.5 | 79.5 | 12.5 | 22    | 2.16 | 27.27 | 25.21 | 52.07  |
| 19417  | 'Rasgrf1'       | 264.4 | 160.5 | 198  | 59.3 | 118  | 98.82 | 233  | 244.7 | 138.3 | 194.4  |
| 19418  | 'Rasgrf2'       | 4.62  | 5.3   | 7.63 | 17.8 | 2.64 | 6.02  | 7.92 | 5.96  | 5.65  | 3.92   |
| 19419  | 'Rasgrp1'       | 14.11 | 5.56  | 21.1 | 17.5 | 45.6 | 16.81 | 6.13 | 3.41  | 17.75 | 47.32  |
| 194231 | 'Cnksr1'        | 0     | 0.03  | 0    | 0    | 0    | 0.03  | 0    | 0     | 0     | 0      |
| 194237 | 'Rimkla'        | 1     | 4.99  | 4.48 | 0    | 4.81 | 0     | 0    | 1.92  | 2.88  | 0      |
| 194268 | '9930104L06Rik' | 6.72  | 10.11 | 3.56 | 7.43 | 7.75 | 0.46  | 10.3 | 8.63  | 12.69 | 2.86   |
| 19428  | 'Rasl2-9'       | 0     | 0     | 0    | 0    | 0    | 0     | 0    | 0     | 0     | 1.76   |
| 194309 | 'Vps37d'        | 2.17  | 0.57  | 1.69 | 7.05 | 0.55 | 0     | 3.09 | 0.03  | 5.29  | 0.03   |
| 194388 | 'Tet3'          | 0.66  | 1.99  | 1.47 | 2.52 | 0.54 | 1.45  | 0.43 | 1.61  | 1.08  | 0.87   |
| 194401 | 'Mical3'        | 2.4   | 4.35  | 3.34 | 7.75 | 3.11 | 5.12  | 5.26 | 2.79  | 4.53  | 7      |
| 194590 | 'Reps2'         | 0.77  | 2.77  | 2.91 | 4.27 | 4.47 | 1.69  | 2.26 | 1.65  | 4.93  | 5.43   |
| 194655 | 'Klf11'         | 1.4   | 10.68 | 2.84 | 22.5 | 1.54 | 1.94  | 0.33 | 1.33  | 0     | 1.68   |
| 194744 | 'Slc25a43'      | 0     | 0.39  | 0    | 0    | 0    | 0     | 0    | 0     | 0     | 2.08   |
| 194908 | 'Pld6'          | 7.85  | 0.05  | 12.9 | 0    | 18.5 | 1.56  | 0.26 | 11.27 | 8.61  | 2.59   |
| 194952 | 'Jmjd4'         | 5.2   | 8.47  | 5.64 | 1.52 | 7.7  | 6.08  | 14.3 | 4.44  | 8.88  | 8.77   |
| 194974 | 'Sun3'          | 0     | 0     | 0    | 0    | 0    | 0.04  | 0    | 0     | 0     | 0      |
| 195018 | 'Zzef1'         | 3.8   | 5.07  | 5.62 | 10.8 | 2.72 | 4.37  | 3.93 | 1.81  | 2.03  | 4.75   |
| 195040 | 'Tmem199'       | 135.9 | 122.1 | 110  | 120  | 170  | 217.4 | 85.4 | 150   | 174.3 | 111.01 |
| 195046 | 'Nlrp1a'        | 0.27  | 0.13  | 0.23 | 0.33 | 0.27 | 0.32  | 0.26 | 0.17  | 0.11  | 0.2    |
| 195208 | 'Dcdc2a'        | 10.57 | 3.46  | 1.57 | 0    | 10.7 | 2.39  | 0    | 6.99  | 4.81  | 0.32   |
| 195209 | 'Zfp469'        | 0     | 0.02  | 0.28 | 0    | 0    | 0     | 0    | 0     | 0     | 0      |
| 195236 | 'Pom12112'      | 0     | 0     | 0    | 0    | 0    | 0     | 0    | 0     | 0     | 0.47   |
| 195434 | 'Utp14b'        | 1.49  | 0.88  | 4.25 | 2.95 | 0.33 | 2.51  | 0    | 0.02  | 0.01  | 0      |
| 195522 | 'Zfp691'        | 1.83  | 1.75  | 2.48 | 4.29 | 2.17 | 1.78  | 1.88 | 3.3   | 7.5   | 1.9    |
| 195531 | 'Zfp982'        | 1.11  | 1.13  | 1.33 | 0    | 0    | 0     | 0    | 0     | 0     | 0      |
| 195646 | 'Hs3st2'        | 0     | 1.35  | 2.25 | 30.9 | 8.18 | 0     | 0    | 25.23 | 3.63  | 2.81   |
| 195726 | 'Scml1'         | 0     | 0.07  | 0.69 | 0    | 0    | 0     | 0    | 0     | 0     | 0      |
| 195727 | 'Nhs'           | 1.27  | 0.5   | 1.16 | 0.85 | 1.32 | 0.34  | 0.84 | 1.64  | 0.36  | 0.24   |
| 195733 | 'Grhl1'         | 14.47 | 21.18 | 5.75 | 14.3 | 8.42 | 1.19  | 12.3 | 10.23 | 1.47  | 3.15   |
| 19645  | 'Rb1'           | 0     | 0     | 3.89 | 2.59 | 0.3  | 1.33  | 0    | 0.06  | 0.11  | 0.67   |
| 19646  | 'Rbbp4'         | 85.74 | 80.2  | 84.3 | 45.6 | 80.1 | 76.08 | 83.1 | 84.44 | 96.99 | 90.3   |
| 19647  | 'Rbbp6'         | 9.76  | 9.09  | 9.63 | 17   | 7.04 | 1.64  | 6.55 | 9.21  | 7.1   | 7.7    |
| 19649  | 'Robo3'         | 0.29  | 0     | 0    | 0    | 0.38 | 0     | 0    | 0.17  | 0.13  | 0      |
| 19650  | 'Rbl1'          | 0.01  | 0     | 1.78 | 2.29 | 0.02 | 0.08  | 0    | 0.26  | 0     | 0      |
| 19651  | 'Rbl2'          | 6.95  | 10.88 | 5.7  | 0.19 | 1.23 | 2.99  | 2.28 | 3.69  | 22.54 | 8.82   |
| 19652  | 'Rbm3'          | 33.99 | 42.64 | 151  | 256  | 86.2 | 45.37 | 37.2 | 123.3 | 47.98 | 53.56  |
| 19653  | 'Rbm4'          | 17.87 | 13.93 | 13.2 | 11.7 | 22.1 | 9.67  | 13   | 24.82 | 23.72 | 13.09  |
| 19654  | 'Rbm6'          | 21.81 | 29.34 | 18.5 | 18.5 | 18.3 | 12.52 | 16.7 | 23.71 | 30.64 | 13.48  |

|       |           |       |       |      |      |      |       |      |       |       |        |
|-------|-----------|-------|-------|------|------|------|-------|------|-------|-------|--------|
| 19655 | 'Rbmx'    | 17.86 | 21.25 | 17.9 | 9.48 | 34.4 | 18.27 | 41.7 | 31.01 | 27.83 | 15.85  |
| 19656 | 'Rbmx1'   | 62.63 | 69.86 | 73.1 | 69.2 | 38.4 | 92.67 | 67.9 | 63.95 | 59.98 | 60.34  |
| 19659 | 'Rbp1'    | 5.31  | 3.92  | 0.75 | 6.35 | 5.96 | 0.95  | 0    | 9.83  | 1.55  | 0.98   |
| 19660 | 'Rbp2'    | 2.34  | 0     | 0    | 0    | 0    | 0     | 0    | 0     | 0     | 0      |
| 19661 | 'Rbp3'    | 0     | 0     | 0    | 0    | 0    | 0     | 0    | 2.98  | 0     | 0.01   |
| 19662 | 'Rbp4'    | 7.65  | 14.2  | 3.61 | 8.98 | 3.3  | 2.21  | 2.35 | 2.57  | 5.75  | 0.1    |
| 19663 | 'Rbpms'   | 2.81  | 19.73 | 1.78 | 0.07 | 2.61 | 8.09  | 1.91 | 0.05  | 0     | 1.36   |
| 19664 | 'Rbpj'    | 8.86  | 4.58  | 4.26 | 0.98 | 8.59 | 1.92  | 1.68 | 4.12  | 5.04  | 1.17   |
| 19668 | 'Rbpjl'   | 0     | 0     | 2.09 | 0    | 0.1  | 0.02  | 6.21 | 0     | 0     | 0.09   |
| 19671 | 'Rce1'    | 27.45 | 26.28 | 34.6 | 6.1  | 20.9 | 15.9  | 16.1 | 31.91 | 18.18 | 23.82  |
| 19672 | 'Rcn1'    | 36.45 | 46.84 | 43.5 | 88.4 | 27.8 | 54.25 | 67.1 | 40.93 | 44.58 | 58.08  |
| 19674 | 'Rcvrn'   | 0     | 0     | 0    | 0.06 | 0    | 0     | 0    | 0     | 0     | 0      |
| 19679 | 'Pitpnm2' | 1.57  | 2.48  | 2.31 | 1.51 | 2.67 | 1.35  | 0.4  | 2.93  | 1.44  | 0.53   |
| 19682 | 'Rdh5'    | 8.37  | 6.27  | 0    | 2.27 | 2.67 | 0     | 0.04 | 4.52  | 6.91  | 2.92   |
| 19684 | 'Rdx'     | 29.97 | 30.49 | 29.1 | 28.5 | 17.7 | 7.27  | 37.1 | 32.21 | 27.85 | 26.54  |
| 19687 | 'Rfc1'    | 6.53  | 3.97  | 7.44 | 8.85 | 9.57 | 1.82  | 3.02 | 6.52  | 3.97  | 6.55   |
| 19691 | 'Recql'   | 4.87  | 1.78  | 0    | 7.08 | 7.52 | 7.01  | 2.32 | 5.53  | 4.97  | 3.61   |
| 19696 | 'Rel'     | 0     | 1.02  | 0.13 | 0.2  | 0    | 4.37  | 0    | 0     | 0     | 0      |
| 19697 | 'Rela'    | 12.8  | 4.58  | 2.98 | 18.7 | 1.79 | 3.21  | 11.7 | 3.89  | 8.95  | 0      |
| 19698 | 'Relb'    | 0     | 0.68  | 0    | 0    | 0    | 0     | 0    | 0     | 0     | 0      |
| 19699 | 'Reln'    | 0.92  | 0.62  | 5.55 | 1.09 | 7.66 | 6.08  | 3.91 | 2.98  | 2.69  | 3.76   |
| 19700 | 'Rem1'    | 0     | 1.54  | 0    | 0    | 0    | 0     | 0    | 3.51  | 0     | 2.55   |
| 19703 | 'Renbp'   | 0     | 5.54  | 10.4 | 32.3 | 6.52 | 0     | 14.9 | 6.58  | 25.77 | 4.91   |
| 19704 | 'Upf1'    | 1.51  | 2.35  | 1.13 | 1.13 | 1.12 | 0.43  | 1.31 | 0.38  | 0.5   | 4.72   |
| 19707 | 'Reps1'   | 1.67  | 3.3   | 4.75 | 4.65 | 2.32 | 9.99  | 15.5 | 7.36  | 11.15 | 4.26   |
| 19708 | 'Dpf2'    | 27.11 | 20.52 | 25.1 | 39.9 | 34.4 | 11.95 | 35.5 | 23.89 | 27.36 | 32.2   |
| 19711 | 'Resp18'  | 4177  | 4287  | 2047 | 4052 | 2718 | 3665  | 1926 | 3619  | 3638  | 4770.5 |
| 19712 | 'Rest'    | 0     | 0.51  | 0    | 0    | 0.01 | 0.38  | 3.63 | 1.02  | 0     | 0      |
| 19713 | 'Ret'     | 0.56  | 0.63  | 0    | 1.71 | 0.51 | 0     | 0.66 | 0     | 0.01  | 1.94   |
| 19714 | 'Rev3'    | 2.93  | 1.76  | 3.77 | 8.85 | 2.11 | 4.65  | 4.36 | 1.48  | 4.24  | 3.03   |
| 19716 | 'Bex1'    | 430   | 338.4 | 429  | 443  | 425  | 590.7 | 437  | 330.7 | 291.2 | 344.2  |
| 19718 | 'Rfc2'    | 45.15 | 43.21 | 34.4 | 95.2 | 38.8 | 48.82 | 61.4 | 59.67 | 51.41 | 44.78  |
| 19719 | 'Rfng'    | 23.48 | 26.21 | 33   | 19.5 | 22.1 | 20.06 | 27.8 | 26.48 | 26.35 | 6.17   |
| 19720 | 'Trim27'  | 8.93  | 7.9   | 3.19 | 17.4 | 19.4 | 5.01  | 0.32 | 3.02  | 6.76  | 14.35  |
| 19724 | 'Rfx1'    | 2.85  | 2.61  | 2.41 | 1.01 | 1.33 | 0.55  | 1.1  | 4.37  | 0.66  | 3.21   |
| 19725 | 'Rfx2'    | 0.08  | 3.35  | 0    | 0    | 3.16 | 0.01  | 0    | 2.46  | 0     | 1.67   |
| 19726 | 'Rfx3'    | 1.83  | 2.53  | 4.69 | 2.58 | 1.35 | 3.34  | 0.67 | 2.19  | 0.62  | 2.98   |
| 19727 | 'Rfxank'  | 1.04  | 0.79  | 5.74 | 6.72 | 2.21 | 11.73 | 10.9 | 6.88  | 7.53  | 9.7    |
| 19729 | 'Slc50a1' | 62.23 | 51.59 | 30.5 | 52.5 | 49.1 | 62.64 | 66.7 | 50.81 | 39.4  | 56.62  |
| 19730 | 'Ralgds'  | 6.11  | 6.6   | 14   | 16.7 | 2.28 | 8.24  | 11   | 2.29  | 3.23  | 2.5    |
| 19731 | 'Rgl1'    | 25.15 | 24.48 | 28.4 | 30.8 | 29.1 | 10.98 | 5.78 | 21.35 | 20.33 | 14.92  |
| 19732 | 'Rgl2'    | 9.33  | 15.95 | 11.1 | 12.1 | 10.4 | 13.85 | 8.56 | 7.57  | 12.81 | 2.71   |
| 19733 | 'Rgn'     | 3.26  | 0     | 0    | 0    | 0    | 0     | 0    | 0     | 0     | 0      |
| 19734 | 'Rgs16'   | 20.04 | 20.69 | 16.9 | 21.5 | 27.5 | 6.99  | 5.58 | 31.9  | 25.96 | 1.84   |
| 19735 | 'Rgs2'    | 33.66 | 27.39 | 47.4 | 20.4 | 17.7 | 59.21 | 22.6 | 46.27 | 29.94 | 31.94  |
| 19736 | 'Rgs4'    | 151.8 | 185.5 | 143  | 193  | 57.8 | 92.36 | 24   | 115.1 | 160.2 | 151.98 |
| 19737 | 'Rgs5'    | 0     | 0     | 0    | 0    | 0    | 0     | 0.01 | 0     | 0     | 4.26   |
| 19739 | 'Rgs9'    | 19.85 | 18.32 | 19.3 | 25   | 14.7 | 20.98 | 43.1 | 26.48 | 33.73 | 29.9   |
| 19743 | 'Rhag'    | 0.02  | 0     | 0.04 | 0.02 | 0    | 0     | 0    | 0     | 1.08  | 0      |
| 19744 | 'Rheb'    | 156.1 | 168.6 | 133  | 174  | 138  | 150   | 99.4 | 172.8 | 166.9 | 129.21 |
| 19746 | 'Rhd'     | 1.09  | 3.12  | 0.06 | 0    | 0    | 0     | 0    | 0     | 0     | 3.77   |
| 19752 | 'Rnase1'  | 0     | 0     | 0    | 0    | 0    | 13.17 | 0    | 0     | 0     | 0      |
| 19762 | 'Rit2'    | 310.3 | 187.2 | 192  | 273  | 301  | 336.9 | 247  | 192.3 | 252.5 | 351.47 |
| 19763 | 'Ring1'   | 2.99  | 2.08  | 2.58 | 9.62 | 14.3 | 1.8   | 2.09 | 2.31  | 9.26  | 1.78   |
| 19765 | 'Ralbp1'  | 11.66 | 10.24 | 9.34 | 23.2 | 9.86 | 15.98 | 14.6 | 4.18  | 11.86 | 11.88  |
| 19766 | 'Ripk1'   | 0.04  | 0.58  | 0.25 | 9.93 | 0.54 | 0.17  | 1.18 | 0.01  | 0.13  | 0.02   |
| 19769 | 'Rit1'    | 41.6  | 51.32 | 38.3 | 21.6 | 48.5 | 47.86 | 39.1 | 25.9  | 32.07 | 44.77  |
| 19771 | 'Rlbp1'   | 0     | 0     | 16.1 | 5.56 | 0.02 | 0     | 16   | 0     | 0     | 0.02   |

|       |           |       |       |      |      |      |       |      |       |       |        |
|-------|-----------|-------|-------|------|------|------|-------|------|-------|-------|--------|
| 19773 | 'Rln1'    | 3.94  | 7.72  | 4.27 | 6.24 | 5.5  | 6.43  | 0.08 | 8.82  | 4.57  | 12.56  |
| 19775 | 'Xpr1'    | 8.77  | 9.68  | 7.21 | 10.1 | 3.69 | 6.87  | 4.68 | 5.17  | 12.31 | 7.86   |
| 19777 | 'Uri1'    | 14.66 | 8.44  | 6.9  | 8.78 | 19.1 | 5.28  | 7.38 | 6.52  | 11.44 | 6.13   |
| 19819 | 'Rnaseh1' | 18.04 | 6.18  | 7.87 | 12.9 | 11.1 | 15.13 | 12.4 | 18.52 | 20.7  | 6.71   |
| 19820 | 'Rlim'    | 7     | 10.37 | 15   | 9.85 | 6.39 | 3.09  | 3.5  | 4.53  | 4.23  | 6.92   |
| 19821 | 'Rnf2'    | 17.45 | 12.1  | 13.4 | 10.2 | 11.6 | 1.52  | 22   | 16.41 | 10.32 | 5.28   |
| 19822 | 'Rnf4'    | 56.09 | 49.42 | 38.1 | 58.7 | 36.1 | 28.46 | 50.6 | 46.97 | 38.49 | 37.47  |
| 19823 | 'Rnf7'    | 160.3 | 162.4 | 107  | 100  | 182  | 160.3 | 156  | 94.47 | 127.6 | 158.68 |
| 19824 | 'Trim10'  | 0     | 0     | 1.84 | 0    | 0    | 0     | 0    | 0     | 0     | 0      |
| 19826 | 'Rnps1'   | 154.1 | 153.6 | 123  | 170  | 120  | 146.9 | 162  | 160.1 | 210   | 152.17 |
| 19876 | 'Robo1'   | 2.27  | 0.25  | 2.19 | 0.24 | 2.55 | 1.42  | 1.41 | 0.57  | 3.47  | 2.2    |
| 19877 | 'Rock1'   | 6.21  | 1.71  | 1.95 | 7.9  | 2.09 | 4.37  | 2.36 | 2.45  | 3.48  | 0.63   |
| 19878 | 'Rock2'   | 4.07  | 2.62  | 5.13 | 9.74 | 2.73 | 6.7   | 0.77 | 2.48  | 5.25  | 5.16   |
| 19879 | 'Slc22a8' | 0     | 0     | 0    | 0    | 0.04 | 0     | 0    | 0     | 0     | 0      |
| 19881 | 'Rom1'    | 7.25  | 0     | 0.29 | 0    | 8.95 | 0     | 0    | 1.01  | 10.68 | 15.42  |
| 19882 | 'Mst1r'   | 0     | 2.12  | 0    | 0    | 0    | 0     | 0    | 0     | 0     | 2.54   |
| 19883 | 'Rora'    | 2.19  | 3.11  | 1.17 | 8.04 | 1.12 | 0.97  | 6.18 | 1.21  | 0.32  | 2.47   |
| 19885 | 'Rorc'    | 0     | 0     | 0.02 | 0    | 0.03 | 0     | 0.03 | 2.31  | 0     | 0.02   |
| 19886 | 'Ros1'    | 0     | 0     | 0    | 0.01 | 0    | 0     | 0    | 0     | 0     | 0      |
| 19889 | 'Rp2'     | 1.5   | 1.22  | 0.03 | 0.03 | 4.21 | 8.96  | 0.23 | 2.27  | 0.72  | 3.26   |
| 19891 | 'Rpa2'    | 9.55  | 16.89 | 3.77 | 12.9 | 10.4 | 8.64  | 17.7 | 7.63  | 12.59 | 22.13  |
| 19893 | 'Rpgr'    | 5.07  | 5.97  | 4.64 | 8.2  | 13.6 | 10.13 | 8.78 | 7.87  | 10.97 | 12.89  |
| 19894 | 'Rph3a'   | 20.43 | 21.51 | 29.7 | 4.55 | 45.4 | 3.41  | 35.4 | 20.66 | 15.12 | 10.42  |
| 19895 | 'Rpia'    | 0.03  | 0.05  | 2.02 | 0    | 0.61 | 0     | 0    | 0.8   | 1.49  | 0      |
| 19896 | 'Rpl10a'  | 182.6 | 166   | 177  | 205  | 119  | 199.9 | 118  | 154.1 | 123.8 | 139.21 |
| 19899 | 'Rpl18'   | 293.5 | 206.5 | 251  | 295  | 199  | 330.2 | 336  | 222.9 | 250.1 | 302.37 |
| 19921 | 'Rpl19'   | 578.6 | 477.9 | 705  | 907  | 657  | 670.4 | 749  | 624.1 | 673.9 | 818.62 |
| 19933 | 'Rpl21'   | 143.1 | 137.2 | 152  | 161  | 107  | 163.9 | 157  | 108.2 | 130.6 | 124.53 |
| 19934 | 'Rpl22'   | 5.48  | 6.16  | 6.54 | 3.73 | 6.67 | 3.18  | 8.32 | 5.47  | 1.55  | 10.62  |
| 19935 | 'Mrpl23'  | 225.2 | 209.8 | 187  | 171  | 177  | 243.9 | 106  | 156   | 197.6 | 245.45 |
| 19941 | 'Rpl26'   | 338.2 | 323.8 | 350  | 361  | 288  | 421.7 | 339  | 310.1 | 363.6 | 247.85 |
| 19942 | 'Rpl27'   | 196   | 176.4 | 283  | 223  | 181  | 238.8 | 199  | 147.8 | 173.2 | 170.43 |
| 19943 | 'Rpl28'   | 299.6 | 229.6 | 361  | 257  | 255  | 392.9 | 356  | 268.2 | 343.3 | 352.62 |
| 19944 | 'Rpl29'   | 137.3 | 122.1 | 120  | 87.2 | 130  | 197.1 | 171  | 147.9 | 129   | 149.24 |
| 19946 | 'Rpl30'   | 180.5 | 202.5 | 209  | 231  | 118  | 235.1 | 155  | 148.8 | 159.4 | 139.86 |
| 19951 | 'Rpl32'   | 348.9 | 334.5 | 333  | 365  | 233  | 284   | 262  | 209.3 | 235.4 | 213.87 |
| 19981 | 'Rpl37a'  | 206.2 | 276.2 | 341  | 418  | 148  | 386   | 184  | 117.7 | 294.6 | 166.45 |
| 19982 | 'Rpl36a'  | 71.64 | 109.4 | 108  | 165  | 69.8 | 128.1 | 99.5 | 53.45 | 79.6  | 81.98  |
| 19988 | 'Rpl6'    | 402.6 | 366.3 | 406  | 502  | 326  | 426.2 | 388  | 319.3 | 311.1 | 330.96 |
| 19989 | 'Rpl7'    | 169.9 | 212.6 | 205  | 163  | 222  | 162.6 | 225  | 146.5 | 140.9 | 178.6  |
| 20005 | 'Rpl9'    | 507.4 | 402.8 | 359  | 689  | 409  | 452.8 | 284  | 366   | 291.3 | 282.74 |
| 20014 | 'Rpn2'    | 153.4 | 156.5 | 155  | 130  | 147  | 136.7 | 113  | 152.6 | 212   | 212.53 |
| 20016 | 'Polr1c'  | 37.87 | 38.24 | 19.2 | 20.8 | 28.4 | 48.9  | 50.5 | 28.97 | 42.49 | 29.02  |
| 20017 | 'Polr1b'  | 3.11  | 7.34  | 6.46 | 18.9 | 7.85 | 0.81  | 9.59 | 0.98  | 2.62  | 9.72   |
| 20018 | 'Polr1d'  | 92.19 | 73.21 | 85.8 | 113  | 89.3 | 79.15 | 45.7 | 87.6  | 76.37 | 90.15  |
| 20019 | 'Polr1a'  | 6.32  | 2.45  | 6.18 | 7.53 | 1.48 | 4.82  | 11.9 | 6.4   | 2.75  | 4.45   |
| 20020 | 'Polr2a'  | 2.33  | 2.09  | 4.95 | 1.03 | 3.4  | 2.58  | 2.28 | 3.17  | 4.2   | 2.51   |
| 20021 | 'Polr2c'  | 148.7 | 133.6 | 136  | 187  | 113  | 152.5 | 104  | 140.2 | 129.2 | 135.69 |
| 20022 | 'Polr2j'  | 108.2 | 142.4 | 139  | 129  | 142  | 127   | 151  | 156.8 | 122.6 | 105.8  |
| 20024 | 'Sub1'    | 189.2 | 194.7 | 143  | 264  | 142  | 150.3 | 145  | 218.9 | 185   | 177.97 |
| 20042 | 'Rps12'   | 54.16 | 68.52 | 78.1 | 111  | 86   | 94.06 | 50.9 | 62.68 | 70.24 | 37.83  |
| 20044 | 'Rps14'   | 447.3 | 380.7 | 326  | 682  | 406  | 583   | 374  | 290.6 | 339.6 | 371.73 |
| 20054 | 'Rps15'   | 297.7 | 268.7 | 333  | 429  | 301  | 350.9 | 400  | 247.1 | 325.8 | 337.25 |
| 20055 | 'Rps16'   | 301.8 | 266.2 | 281  | 263  | 203  | 304.1 | 276  | 228.8 | 227.2 | 232.46 |
| 20068 | 'Rps17'   | 383   | 318.8 | 457  | 553  | 203  | 378.8 | 333  | 202.9 | 258.8 | 222.91 |
| 20084 | 'Rps18'   | 208.4 | 229.4 | 200  | 357  | 213  | 286.8 | 211  | 151.9 | 128.9 | 162.49 |
| 20085 | 'Rps19'   | 327.3 | 405.8 | 427  | 554  | 324  | 345.5 | 302  | 227.9 | 254.2 | 258.23 |
| 20088 | 'Rps24'   | 208   | 199.5 | 234  | 242  | 161  | 229.3 | 254  | 167.1 | 176   | 168.44 |

|       |           |       |       |      |      |      |       |      |       |       |         |
|-------|-----------|-------|-------|------|------|------|-------|------|-------|-------|---------|
| 20090 | 'Rps29'   | 144.9 | 288.2 | 324  | 418  | 131  | 465.6 | 215  | 69    | 314.2 | 106.79  |
| 20091 | 'Rps3a1'  | 194.1 | 180.6 | 253  | 213  | 211  | 228.1 | 324  | 191.5 | 146.2 | 232.94  |
| 20102 | 'Rps4x'   | 197.9 | 172.9 | 152  | 284  | 197  | 148.1 | 172  | 121.2 | 85.78 | 142.64  |
| 20103 | 'Rps5'    | 184.2 | 230.5 | 245  | 285  | 242  | 270.1 | 208  | 193.8 | 153.8 | 173.83  |
| 20104 | 'Rps6'    | 22.7  | 43.75 | 15.5 | 22.1 | 20.6 | 18.15 | 18.3 | 24.97 | 10.78 | 17.14   |
| 20111 | 'Rps6ka1' | 5.05  | 0.06  | 0.05 | 0.02 | 2.3  | 19.26 | 0.02 | 0.33  | 5.1   | 2.85    |
| 20112 | 'Rps6ka2' | 6.7   | 11.36 | 8.2  | 6.63 | 9.61 | 4.8   | 8.44 | 13.42 | 8.34  | 20.34   |
| 20115 | 'Rps7'    | 162   | 159.1 | 155  | 169  | 174  | 201.9 | 157  | 141.5 | 115.6 | 164.9   |
| 20116 | 'Rps8'    | 283.6 | 264.5 | 358  | 486  | 246  | 341.8 | 253  | 251.4 | 231.3 | 232.16  |
| 20128 | 'Trim30a' | 0     | 0     | 2.33 | 0    | 0    | 4.81  | 0    | 0     | 0     | 0.01    |
| 20130 | 'Rras'    | 0.68  | 0     | 0    | 0    | 0    | 0     | 0    | 3.31  | 0     | 3.53    |
| 20133 | 'Rrm1'    | 3.75  | 5.23  | 4.44 | 8.16 | 7.89 | 6.26  | 5.95 | 2.38  | 6.73  | 4.16    |
| 20135 | 'Rrm2'    | 0     | 0.31  | 0.02 | 0    | 2.66 | 0     | 0    | 0     | 0.08  | 0       |
| 20147 | 'Rs1'     | 0     | 0.04  | 0    | 0    | 0.12 | 0     | 0    | 0.26  | 0     | 0       |
| 20148 | 'Dhrs3'   | 13.25 | 14.43 | 4.36 | 10.1 | 0    | 15.18 | 11.6 | 7.15  | 8.72  | 7.62    |
| 20163 | 'Rsu1'    | 9.94  | 0     | 12   | 14.9 | 13.4 | 19.33 | 7.82 | 11.97 | 7.66  | 13.16   |
| 20166 | 'Rtkn'    | 8.92  | 9.15  | 30.4 | 2.92 | 5.44 | 17.72 | 7.58 | 12.97 | 17.81 | 3.51    |
| 20167 | 'Rtn2'    | 3.72  | 6.1   | 2.16 | 12.2 | 1.97 | 11.51 | 15.8 | 9.2   | 7.96  | 8.95    |
| 20168 | 'Rtn3'    | 518.2 | 522.7 | 573  | 294  | 427  | 445.9 | 630  | 544.2 | 422.1 | 437.74  |
| 20170 | 'Hps6'    | 2.01  | 10.71 | 2.14 | 14.2 | 4.57 | 5.89  | 0.02 | 2.3   | 12.4  | 0.02    |
| 20174 | 'Ruvbl2'  | 27.97 | 40.48 | 56.1 | 44.5 | 54.2 | 52.97 | 59.4 | 67.45 | 50.53 | 33.95   |
| 20181 | 'Rxra'    | 2.77  | 0.2   | 1.23 | 2.01 | 1.52 | 0.89  | 2.5  | 4.47  | 5.26  | 0.79    |
| 20182 | 'Rxb'     | 6.6   | 5.46  | 3.74 | 4.46 | 13.4 | 1.41  | 0    | 5.15  | 2.32  | 5.3     |
| 20183 | 'Rxrg'    | 20.34 | 39.93 | 42.4 | 2.51 | 28   | 57.19 | 21.2 | 83.42 | 49.81 | 49.91   |
| 20184 | 'Uimc1'   | 16.36 | 16.23 | 7.43 | 7.32 | 7.29 | 7.42  | 2.11 | 6.92  | 2.56  | 3.1     |
| 20185 | 'Ncor1'   | 6.26  | 8.77  | 6.32 | 11.8 | 11.2 | 10.13 | 9.37 | 5.02  | 4.86  | 8.86    |
| 20186 | 'Nr1h4'   | 0     | 0     | 0    | 0.08 | 0    | 0     | 0    | 0     | 0     | 0       |
| 20187 | 'Ryk'     | 2.12  | 1.62  | 0    | 0.73 | 2.56 | 1.8   | 0    | 1.54  | 1.08  | 1.24    |
| 20190 | 'Ryr1'    | 0.81  | 0.22  | 0.15 | 0.02 | 0.48 | 2.41  | 0.85 | 0.38  | 0.02  | 0.68    |
| 20191 | 'Ryr2'    | 0.44  | 0.54  | 2.88 | 0.33 | 2.19 | 0.2   | 2.46 | 0.8   | 0.44  | 1.4     |
| 20192 | 'Ryr3'    | 1.27  | 1.29  | 1.31 | 0.71 | 2.65 | 3.44  | 0.36 | 2.1   | 3.47  | 2.2     |
| 20193 | 'S100a1'  | 47.8  | 44.59 | 151  | 107  | 137  | 138   | 98.7 | 51.43 | 58.31 | 47.06   |
| 20194 | 'S100a10' | 81.37 | 24.85 | 78.2 | 13.4 | 88   | 66.42 | 19.8 | 66.87 | 28.1  | 59.28   |
| 20195 | 'S100a11' | 9.43  | 0.32  | 31.9 | 0    | 9.84 | 0     | 0    | 2.31  | 3.65  | 12.92   |
| 20196 | 'S100a13' | 12.95 | 6.29  | 16.7 | 6.07 | 8.57 | 23.9  | 20.6 | 4.08  | 3.09  | 3.07    |
| 20197 | 'S100a3'  | 0     | 0     | 1.79 | 0    | 0    | 0     | 0    | 0     | 0     | 0       |
| 20198 | 'S100a4'  | 0     | 0     | 0    | 0.13 | 13.6 | 0     | 15.1 | 0     | 0     | 3.08    |
| 20200 | 'S100a6'  | 3.35  | 0.64  | 7.62 | 0    | 13.4 | 0.07  | 4.44 | 0     | 0     | 9.08    |
| 20201 | 'S100a8'  | 0     | 0     | 5.12 | 0    | 0    | 0     | 0    | 0     | 0     | 0       |
| 20203 | 'S100b'   | 13.78 | 15.87 | 21.4 | 36.9 | 116  | 28.47 | 31.5 | 14.14 | 7.38  | 6.65    |
| 20208 | 'Saa1'    | 0     | 24.99 | 0    | 0    | 0    | 0     | 0    | 5.8   | 6.43  | 0       |
| 20209 | 'Saa2'    | 0     | 3.15  | 0.09 | 0    | 0    | 0     | 0    | 20.14 | 0     | 0       |
| 20215 | 'Sag'     | 2.95  | 7.01  | 0.94 | 3.38 | 0.11 | 0     | 1.13 | 4.18  | 0     | 1.8     |
| 20216 | 'Acsm3'   | 0     | 0     | 0    | 0    | 0.11 | 0     | 0    | 0     | 0     | 0       |
| 20218 | 'Khdrbs1' | 13.89 | 10.6  | 17.6 | 20.4 | 10.3 | 1.12  | 17.7 | 11.19 | 12.08 | 11.89   |
| 20220 | 'Sap18'   | 41.51 | 55.87 | 45.3 | 51.2 | 38.1 | 39.19 | 25.6 | 31.23 | 31.26 | 43.31   |
| 20222 | 'Sf3a2'   | 5.43  | 6.73  | 9.85 | 4.23 | 13.1 | 1.95  | 2.22 | 8.49  | 25.26 | 15.91   |
| 20224 | 'Sar1a'   | 143.4 | 122.2 | 113  | 105  | 88.7 | 85.23 | 108  | 111.8 | 118.7 | 147.47  |
| 20226 | 'Sars'    | 70.65 | 50.9  | 73.8 | 40.5 | 69.7 | 74.07 | 71.6 | 78.24 | 65.05 | 57.69   |
| 20227 | 'Sart1'   | 2.77  | 7.8   | 4.29 | 7.78 | 1.08 | 5.72  | 4.87 | 7.81  | 4.77  | 3.31    |
| 20229 | 'Sat1'    | 43.19 | 96.63 | 45.9 | 154  | 33.3 | 117.8 | 40.5 | 44.25 | 86.39 | 62.05   |
| 20230 | 'Satb1'   | 0.38  | 2.07  | 2.83 | 0    | 1.35 | 2.96  | 3.25 | 2.1   | 0.22  | 0.48    |
| 20238 | 'Atxn1'   | 8.74  | 8.78  | 7.12 | 6.15 | 11.9 | 9.13  | 9.75 | 10.5  | 9.95  | 2.58    |
| 20239 | 'Atxn2'   | 6.57  | 5.22  | 6.22 | 15.5 | 8.95 | 4.53  | 7.66 | 7.84  | 4.5   | 10.43   |
| 20249 | 'Scd1'    | 2.23  | 2.3   | 3.29 | 7.47 | 11.9 | 0.77  | 8.65 | 6.02  | 4.85  | 5.78    |
| 20250 | 'Scd2'    | 67.99 | 45.35 | 72.7 | 46.5 | 40.8 | 23.11 | 54.1 | 32.63 | 46.84 | 55.67   |
| 20254 | 'Scg2'    | 1962  | 1985  | 717  | 2180 | 411  | 911.1 | 773  | 1300  | 1337  | 1307.36 |
| 20255 | 'Scg3'    | 102.3 | 126   | 92.1 | 142  | 69.4 | 73.74 | 62.1 | 87.26 | 75.29 | 79.31   |

|       |            |       |       |      |      |      |       |      |       |       |         |
|-------|------------|-------|-------|------|------|------|-------|------|-------|-------|---------|
| 20256 | 'Clec11a'  | 3.5   | 0     | 8.08 | 0.2  | 7.77 | 2.36  | 0.03 | 2.24  | 3.91  | 8.78    |
| 20257 | 'Stmn2'    | 302.7 | 261.4 | 294  | 233  | 363  | 299.8 | 218  | 324.9 | 294.3 | 298.82  |
| 20262 | 'Stmn3'    | 1380  | 1364  | 1655 | 1186 | 1498 | 1957  | 1592 | 1418  | 1079  | 1298.67 |
| 20265 | 'Scn1a'    | 11.62 | 2.54  | 22.7 | 12   | 13.8 | 2.63  | 6.07 | 6.5   | 6.69  | 4.69    |
| 20266 | 'Scn1b'    | 15.74 | 8.82  | 23.4 | 12.7 | 37   | 7.41  | 18.8 | 23.76 | 12.19 | 9.44    |
| 20269 | 'Scn3a'    | 9.91  | 6.52  | 10.8 | 20.9 | 8.71 | 5.07  | 9.5  | 8.07  | 12.09 | 16.91   |
| 20271 | 'Scn5a'    | 1.78  | 0.32  | 0.97 | 0.01 | 2.88 | 0     | 0.05 | 1.24  | 0.68  | 1.17    |
| 20272 | 'Scn7a'    | 0     | 0     | 0    | 0    | 0    | 0     | 0.4  | 0     | 0     | 0.05    |
| 20273 | 'Scn8a'    | 3.89  | 1.25  | 5.33 | 10.5 | 6.9  | 1.03  | 2.72 | 3.23  | 5.74  | 3.23    |
| 20274 | 'Scn9a'    | 25.45 | 8.58  | 6.36 | 18.7 | 10.2 | 11.63 | 4.46 | 7.13  | 16.27 | 13.63   |
| 20276 | 'Scnn1a'   | 0     | 0     | 0    | 7.07 | 0    | 0     | 0.04 | 1.28  | 3.71  | 2.24    |
| 20277 | 'Scnn1b'   | 0     | 6.09  | 0    | 0    | 0    | 0     | 0    | 0     | 0     | 0       |
| 20280 | 'Scp2'     | 55.31 | 48.05 | 47.5 | 45.3 | 54.5 | 74.22 | 63.2 | 54.79 | 60.77 | 60.92   |
| 20284 | 'Scrg1'    | 18.69 | 17.56 | 46   | 79.6 | 24.9 | 31.4  | 59.7 | 17.39 | 16.26 | 14.07   |
| 20286 | 'Zc3h7b'   | 4.39  | 3.55  | 0.84 | 0.11 | 3.24 | 1.96  | 0.24 | 1.57  | 1.94  | 2.76    |
| 20287 | 'Sct'      | 0     | 6.45  | 0    | 0    | 0    | 2.51  | 0    | 0     | 0     | 17.81   |
| 20289 | 'Scx'      | 0.16  | 0     | 1.09 | 0    | 0    | 2.36  | 2.54 | 0.94  | 0     | 1.89    |
| 20293 | 'Ccl12'    | 1.37  | 0     | 0    | 38.6 | 0.1  | 12.77 | 5.14 | 0     | 0     | 7.34    |
| 20295 | 'Ccl17'    | 1.92  | 0     | 13.8 | 8.69 | 6.34 | 0     | 0.11 | 1.22  | 0     | 4.74    |
| 20296 | 'Ccl2'     | 22.82 | 6.27  | 0    | 13.4 | 0    | 0     | 0    | 0     | 1.81  | 0       |
| 20297 | 'Ccl20'    | 0     | 0     | 0    | 0    | 0    | 0     | 0    | 0     | 0     | 3.94    |
| 20299 | 'Ccl22'    | 5.89  | 0     | 0    | 0    | 0    | 0     | 0    | 0     | 0     | 0       |
| 20300 | 'Ccl25'    | 3.1   | 13.78 | 7.56 | 0.06 | 0    | 14.56 | 1.79 | 4.86  | 11.98 | 8.35    |
| 20301 | 'Ccl27a'   | 132.1 | 133.1 | 112  | 146  | 144  | 126.8 | 88.3 | 141.4 | 214.7 | 201.65  |
| 20302 | 'Ccl3'     | 5.8   | 0     | 0    | 7.42 | 0    | 89.05 | 0    | 0     | 5.94  | 2.4     |
| 20303 | 'Ccl4'     | 46.75 | 0     | 0    | 0    | 0    | 91.37 | 6.43 | 0.33  | 3.59  | 2.59    |
| 20305 | 'Ccl6'     | 1.65  | 4.58  | 0    | 0    | 2.82 | 3.39  | 7.5  | 3.43  | 0     | 1.27    |
| 20306 | 'Ccl7'     | 4.37  | 0     | 0    | 0    | 0    | 15.2  | 0    | 0     | 0     | 0       |
| 20307 | 'Ccl8'     | 0     | 0     | 0    | 0    | 0    | 0     | 0    | 0     | 0.09  | 0       |
| 20308 | 'Ccl9'     | 1.3   | 0.13  | 0.18 | 0.12 | 0.05 | 0.09  | 0.13 | 0.01  | 0.04  | 0.17    |
| 20309 | 'Cxcl15'   | 0.04  | 0     | 0    | 0.03 | 0    | 0     | 0    | 0     | 0.02  | 0       |
| 20311 | 'Cxcl5'    | 0     | 0     | 0    | 0    | 0    | 1.81  | 0    | 0     | 0     | 1.92    |
| 20312 | 'Cx3cl1'   | 148.3 | 132   | 137  | 34   | 114  | 94.51 | 128  | 120.6 | 105.9 | 92.46   |
| 20315 | 'Cxcl12'   | 0     | 0.13  | 0    | 0    | 0.05 | 0     | 0.03 | 0     | 0     | 5.38    |
| 20316 | 'Sdf2'     | 186.3 | 196.6 | 117  | 229  | 151  | 195.3 | 140  | 148.5 | 195.8 | 223.05  |
| 20317 | 'Serpinf1' | 9.99  | 0     | 0.07 | 0.7  | 48.7 | 166.8 | 11.5 | 10.25 | 100.3 | 99.58   |
| 20318 | 'Sdf4'     | 81.52 | 98.53 | 87   | 98.1 | 58.9 | 72.96 | 79   | 67.02 | 93.3  | 104.8   |
| 20319 | 'Sfrp2'    | 0.84  | 1.59  | 4.43 | 0    | 4.71 | 3.91  | 6.01 | 2.81  | 31.24 | 22.4    |
| 20320 | 'Nptn'     | 179.2 | 189.9 | 178  | 90.5 | 229  | 165.4 | 187  | 277.7 | 252.4 | 278.4   |
| 20321 | 'Frrs1'    | 1.62  | 0.64  | 0.55 | 0.01 | 0.21 | 1.45  | 0    | 0     | 2.14  | 0.96    |
| 20322 | 'Sord'     | 4.78  | 17.46 | 8.99 | 9.59 | 12.7 | 16    | 11.1 | 9.86  | 7.59  | 17.23   |
| 20324 | 'Cavin2'   | 0.07  | 5.89  | 3.35 | 2.2  | 0    | 3.35  | 4.75 | 1.67  | 0.14  | 0.57    |
| 20333 | 'Sec22b'   | 57.18 | 57.14 | 55.1 | 64.7 | 31.5 | 74.21 | 56.4 | 49.5  | 41.43 | 52.21   |
| 20334 | 'Sec23a'   | 33.25 | 35.26 | 40.7 | 30.5 | 34.8 | 4.55  | 41.1 | 30.26 | 41.54 | 43.7    |
| 20335 | 'Sec61g'   | 111.3 | 136.2 | 143  | 191  | 96   | 210.1 | 92   | 71    | 145.3 | 109.31  |
| 20336 | 'Exoc4'    | 13.32 | 11.65 | 17.5 | 6.41 | 17.3 | 5.75  | 20.7 | 10.01 | 13.48 | 12.96   |
| 20338 | 'Sel1l'    | 41.41 | 36.08 | 35.8 | 30   | 26.7 | 21.12 | 34.4 | 33.1  | 42.21 | 49.74   |
| 20340 | 'Glg1'     | 15.56 | 14.33 | 14.8 | 27.2 | 16   | 16.01 | 21.5 | 9.47  | 29.45 | 20.82   |
| 20341 | 'Selenbp1' | 1.29  | 5.33  | 0.03 | 17.1 | 6.8  | 8.55  | 10.5 | 7.31  | 4.36  | 7.13    |
| 20342 | 'Selenbp2' | 0     | 0.33  | 0    | 0.47 | 0    | 0.23  | 0.25 | 0.13  | 0.11  | 0.16    |
| 20344 | 'Selp'     | 0     | 0.1   | 0    | 0    | 0    | 0     | 0    | 0     | 0     | 0       |
| 20345 | 'Selplg'   | 0.67  | 5.47  | 0.05 | 0.03 | 4.55 | 117.2 | 7.52 | 2.76  | 11.4  | 5.19    |
| 20346 | 'Sema3a'   | 2.59  | 8.72  | 2.63 | 4.68 | 0.47 | 0     | 0.04 | 1.61  | 1.5   | 1.7     |
| 20347 | 'Sema3b'   | 2.42  | 0     | 0    | 0    | 1.87 | 0     | 4.36 | 0     | 2.27  | 0       |
| 20348 | 'Sema3c'   | 0.63  | 0     | 2.01 | 0    | 5.48 | 1.65  | 0    | 1.07  | 10.62 | 4.99    |
| 20349 | 'Sema3e'   | 2.06  | 2.69  | 3.74 | 4.78 | 1.16 | 0     | 0.01 | 1.85  | 0.94  | 0.63    |
| 20350 | 'Sema3f'   | 2.31  | 0     | 4.83 | 0    | 1.71 | 0.01  | 0    | 0.48  | 5.49  | 1.97    |
| 20351 | 'Sema4a'   | 88.36 | 60.04 | 38.7 | 20   | 38.8 | 64.1  | 69   | 85.55 | 56.16 | 88.37   |

|       |           |       |       |      |      |      |       |      |       |       |         |
|-------|-----------|-------|-------|------|------|------|-------|------|-------|-------|---------|
| 20352 | 'Sema4b'  | 1.47  | 2.68  | 3.41 | 7.96 | 2.74 | 1.37  | 2.51 | 8.05  | 5.1   | 4.03    |
| 20353 | 'Sema4c'  | 0.36  | 0.18  | 0.04 | 0.51 | 0    | 0     | 0.31 | 0     | 1.33  | 0.09    |
| 20354 | 'Sema4d'  | 5.43  | 0.96  | 3.72 | 4.91 | 8.85 | 9.89  | 6.18 | 8.47  | 7.61  | 2.52    |
| 20355 | 'Sema4f'  | 2.69  | 4.44  | 8.13 | 3.84 | 3.6  | 2.38  | 14.5 | 2.2   | 5.39  | 4.94    |
| 20356 | 'Sema5a'  | 2.8   | 0.86  | 4.18 | 2.21 | 3.17 | 1.29  | 3.37 | 0.27  | 0.51  | 3.66    |
| 20357 | 'Sema5b'  | 0.8   | 0.52  | 6.88 | 5.88 | 0.12 | 3.11  | 1.69 | 0.35  | 9.87  | 8.14    |
| 20358 | 'Sema6a'  | 9.56  | 12.54 | 8.86 | 2.67 | 5.48 | 3.05  | 12.2 | 7.72  | 9.87  | 18.1    |
| 20359 | 'Sema6b'  | 2.16  | 1.58  | 2.65 | 2.28 | 2.67 | 0.12  | 3.37 | 1.38  | 3.49  | 0.29    |
| 20360 | 'Sema6c'  | 0.02  | 0.05  | 0.22 | 0.88 | 0.23 | 0.01  | 0.48 | 1.09  | 1.85  | 0.06    |
| 20361 | 'Sema7a'  | 0     | 0.04  | 1.31 | 0    | 0.3  | 0.04  | 0.65 | 0.52  | 0.36  | 0       |
| 20362 | 'Sept8'   | 42.7  | 37.92 | 43.4 | 37.1 | 29.3 | 47.95 | 48.3 | 31.62 | 56.41 | 6.54    |
| 20363 | 'Selenop' | 151.1 | 83.97 | 29.7 | 76.4 | 54.9 | 64.13 | 74.7 | 34.85 | 31.42 | 27.63   |
| 20364 | 'Selenow' | 1132  | 1054  | 893  | 1879 | 1634 | 1281  | 931  | 1380  | 1149  | 1025.19 |
| 20365 | 'Serf1'   | 29.41 | 46.08 | 32.5 | 30.2 | 30.8 | 22.48 | 47.2 | 23.76 | 46.73 | 34.72   |
| 20370 | 'Sez6'    | 19.31 | 10.43 | 41.2 | 11.4 | 7.01 | 35.65 | 44.5 | 28.04 | 33.65 | 19      |
| 20375 | 'Spi1'    | 0.46  | 0     | 0    | 0    | 0    | 15.43 | 5.07 | 2.1   | 0     | 0       |
| 20377 | 'Sfrp1'   | 0.02  | 0.37  | 0    | 0.77 | 0.02 | 0     | 0    | 1.19  | 0     | 0       |
| 20378 | 'Frzb'    | 0     | 0     | 0.41 | 0    | 0.03 | 0     | 4.37 | 0     | 0.01  | 0       |
| 20379 | 'Sfrp4'   | 0     | 2.28  | 3.9  | 0    | 0    | 0     | 11   | 0     | 0     | 0       |
| 20382 | 'Srsf2'   | 54.73 | 31.65 | 49.1 | 91.2 | 122  | 64.63 | 62.1 | 75.67 | 86.87 | 70.81   |
| 20383 | 'Srsf3'   | 62.38 | 81.18 | 66.7 | 41   | 69.1 | 78.12 | 61   | 60.73 | 56.62 | 78.61   |
| 20384 | 'Srsf5'   | 204.9 | 267.2 | 239  | 293  | 310  | 316.4 | 327  | 250   | 305.8 | 296.91  |
| 20388 | 'Sftpb'   | 0     | 1.24  | 0    | 0    | 0    | 0     | 0    | 0     | 0     | 0       |
| 20389 | 'Sftpc'   | 0     | 0     | 0    | 0    | 0    | 0     | 6.1  | 0.47  | 0     | 0       |
| 20391 | 'Sgca'    | 0     | 0     | 0.14 | 0.04 | 0    | 0.03  | 0.04 | 0.03  | 0     | 0.03    |
| 20392 | 'Sgce'    | 45.55 | 23.3  | 29.4 | 11.8 | 11.4 | 16.44 | 22.9 | 36.19 | 35.46 | 33.02   |
| 20393 | 'Sgk1'    | 16.16 | 7.94  | 21.8 | 8.16 | 5.71 | 58.34 | 9.55 | 5.05  | 17.68 | 6.92    |
| 20394 | 'Scg5'    | 516.2 | 598.9 | 514  | 737  | 665  | 657.3 | 540  | 584.5 | 606   | 674.64  |
| 20397 | 'Sgpl1'   | 1.96  | 4.94  | 14.2 | 12.1 | 1.25 | 0.39  | 6.19 | 4.38  | 6.06  | 1.17    |
| 20399 | 'Sh2b1'   | 31.87 | 16.05 | 21.7 | 8.52 | 31.5 | 39.98 | 31.5 | 22.63 | 13.05 | 33.63   |
| 20400 | 'Sh2d1a'  | 0     | 0     | 0    | 0    | 0    | 0     | 0.62 | 0     | 0     | 0.3     |
| 20401 | 'Sh3bp1'  | 0     | 2.26  | 5.36 | 1.38 | 1.69 | 4.8   | 13.4 | 4.22  | 3.71  | 0.63    |
| 20402 | 'Zfp106'  | 3.8   | 1.82  | 5.31 | 7.02 | 7.03 | 2.31  | 6.28 | 3.31  | 7.49  | 3.42    |
| 20403 | 'Itsn2'   | 8.18  | 0.56  | 10.2 | 0.72 | 4.13 | 6.25  | 8.54 | 2.98  | 9.42  | 2.85    |
| 20404 | 'Sh3gl2'  | 148.5 | 97.54 | 150  | 46.2 | 90.3 | 119.3 | 151  | 134.8 | 85.49 | 90.7    |
| 20405 | 'Sh3gl1'  | 42.48 | 26.34 | 21.7 | 16   | 19.9 | 34.52 | 23.4 | 30.45 | 33.32 | 21.97   |
| 20408 | 'Sh3gl3'  | 15.47 | 36.66 | 5.22 | 5.34 | 19.6 | 14.46 | 10.2 | 5.23  | 11.64 | 12.72   |
| 20409 | 'Ostf1'   | 9.27  | 6.75  | 9.58 | 6.49 | 7.64 | 22.38 | 15   | 13.72 | 16.72 | 13.55   |
| 20410 | 'Sorbs3'  | 2.01  | 3.07  | 9.93 | 3.24 | 9.19 | 0.84  | 0    | 0.02  | 0     | 3.94    |
| 20411 | 'Sorbs1'  | 28.37 | 20.29 | 17.7 | 18.6 | 21.5 | 22.44 | 11.5 | 30.77 | 18.81 | 13.73   |
| 20416 | 'Shc1'    | 0.24  | 4.31  | 2.31 | 9.86 | 3.17 | 0.01  | 0    | 0     | 1.4   | 2.13    |
| 20418 | 'Shc3'    | 2.38  | 0.76  | 0    | 11.6 | 1.78 | 0.45  | 0    | 0.05  | 0.08  | 0       |
| 20419 | 'Shcbp1'  | 0     | 0.65  | 0.86 | 0    | 0    | 0     | 0    | 0     | 0     | 0       |
| 20420 | 'Shd'     | 49.94 | 38.16 | 84.8 | 52.5 | 93.9 | 47.31 | 82.4 | 41.08 | 28.89 | 34.86   |
| 20422 | 'Sem1'    | 257.9 | 233.9 | 268  | 373  | 268  | 327.1 | 211  | 173.6 | 304.7 | 206.08  |
| 20423 | 'Shh'     | 3.9   | 0     | 6.41 | 1.78 | 1.1  | 0.05  | 0    | 0.51  | 1.88  | 0.06    |
| 20425 | 'Shmt1'   | 0     | 0     | 3.17 | 0.12 | 0    | 0.1   | 5.55 | 0     | 0     | 0       |
| 20429 | 'Shox2'   | 0     | 0     | 0    | 0    | 1.13 | 0     | 0    | 0     | 0     | 0.01    |
| 20430 | 'Cyfip1'  | 8.21  | 5.92  | 17.2 | 14.7 | 7.7  | 12.09 | 21.6 | 11.57 | 21.07 | 8.67    |
| 20431 | 'Pmel'    | 0     | 0     | 1.57 | 0    | 0.07 | 0     | 0    | 2.96  | 0     | 0.28    |
| 20437 | 'Siah1a'  | 0.06  | 3.99  | 0.3  | 0.46 | 0.68 | 0.39  | 2.38 | 0.86  | 1.59  | 0.89    |
| 20438 | 'Siah1b'  | 0     | 2.06  | 5.78 | 10.5 | 5.72 | 0     | 4.28 | 5.98  | 2.1   | 5.32    |
| 20439 | 'Siah2'   | 1.46  | 1.65  | 1.33 | 8.82 | 0.53 | 2.9   | 3.08 | 0     | 0     | 3.53    |
| 20440 | 'St6gal1' | 0     | 1.09  | 3.9  | 0    | 1.82 | 0.71  | 2.43 | 2.07  | 2.82  | 0.14    |
| 20441 | 'St3gal3' | 7.22  | 6.55  | 13.2 | 10   | 0.39 | 2.5   | 6.04 | 7.72  | 5.94  | 5.48    |
| 20442 | 'St3gal1' | 1.57  | 0     | 0.03 | 3.17 | 0.02 | 0     | 0    | 1.27  | 0     | 0.63    |
| 20443 | 'St3gal4' | 8.36  | 20.05 | 9.15 | 37.2 | 4.54 | 3.38  | 8.33 | 11.1  | 7.36  | 9.47    |
| 20444 | 'St3gal2' | 3.37  | 2.36  | 5.37 | 1    | 0.48 | 1.47  | 3.37 | 2.61  | 4.46  | 4.38    |

|       |              |       |       |      |      |      |       |      |       |       |        |
|-------|--------------|-------|-------|------|------|------|-------|------|-------|-------|--------|
| 20445 | 'St6galnac1' | 0     | 0     | 0.62 | 0    | 0    | 0.78  | 0    | 0     | 0     | 0      |
| 20446 | 'St6galnac2' | 0     | 0     | 0    | 0    | 0    | 0     | 0    | 0.06  | 0     | 0      |
| 20447 | 'St6galnac3' | 0.23  | 1.26  | 1    | 0    | 0.12 | 1.14  | 0.66 | 0.97  | 0.56  | 0      |
| 20448 | 'St6galnac4' | 16.21 | 9.85  | 4.99 | 1.47 | 15.3 | 9.18  | 4.52 | 4.1   | 15.02 | 9.68   |
| 20449 | 'St8sia1'    | 0.01  | 0.43  | 0.61 | 1.03 | 0.41 | 0     | 2.73 | 0     | 2.98  | 1.28   |
| 20450 | 'St8sia2'    | 0     | 2.1   | 3.51 | 0.82 | 2.98 | 1.38  | 6.58 | 0     | 0.5   | 3.51   |
| 20451 | 'St8sia3'    | 26.36 | 23.85 | 20   | 16.5 | 17.2 | 31.37 | 28   | 20.33 | 20.13 | 34.59  |
| 20452 | 'St8sia4'    | 0.12  | 1.23  | 1.47 | 0    | 3.85 | 0.03  | 1.08 | 0.12  | 0.6   | 2.57   |
| 20454 | 'St3gal5'    | 21.56 | 14.59 | 4.41 | 76.5 | 19.6 | 19.24 | 15.1 | 15.51 | 23.42 | 12.49  |
| 20459 | 'Ptk6'       | 0     | 0     | 0    | 0.05 | 0    | 0     | 0    | 0     | 0     | 0      |
| 20460 | 'Stil'       | 0     | 0     | 0    | 0    | 0.07 | 0     | 3    | 0     | 0     | 0      |
| 20462 | 'Tra2b'      | 110.3 | 131.9 | 90.1 | 183  | 75.7 | 105.3 | 66.8 | 104.1 | 122.4 | 121.08 |
| 20463 | 'Cox7a2l'    | 244.4 | 96.73 | 150  | 167  | 159  | 199.2 | 138  | 175   | 154.9 | 132.11 |
| 20464 | 'Sim1'       | 0.14  | 2     | 0    | 0    | 0.01 | 0     | 3.37 | 0     | 0     | 0      |
| 20465 | 'Sim2'       | 0     | 0.51  | 0    | 0    | 0    | 0     | 0    | 0.03  | 0     | 0      |
| 20466 | 'Sin3a'      | 4.06  | 4.14  | 7.03 | 1.71 | 3.31 | 0.6   | 6.61 | 2.95  | 13.36 | 4.39   |
| 20467 | 'Sin3b'      | 38.49 | 78.96 | 72   | 58.8 | 49.4 | 68.5  | 71.6 | 56.6  | 75.01 | 65.93  |
| 20469 | 'Sipa1'      | 5.64  | 1.47  | 7.96 | 10.2 | 6.56 | 19.18 | 7.14 | 4.37  | 9.27  | 1.38   |
| 20471 | 'Six1'       | 0     | 0     | 0    | 0    | 1.68 | 0     | 0.02 | 0     | 0     | 0.46   |
| 20473 | 'Six3'       | 0.81  | 5.6   | 3.57 | 5.03 | 11.6 | 7.68  | 1.17 | 1.15  | 4.11  | 14.02  |
| 20474 | 'Six4'       | 0     | 0     | 0.47 | 0    | 0    | 0     | 0    | 0     | 0     | 0      |
| 20476 | 'Six6'       | 0     | 0     | 0    | 0    | 18.8 | 0     | 0.01 | 0     | 0     | 0.06   |
| 20479 | 'Vps4b'      | 22.73 | 28.49 | 25.2 | 11.4 | 13.4 | 14.44 | 19.6 | 17.59 | 28.42 | 48.3   |
| 20480 | 'Clpb'       | 8.94  | 14.97 | 12.9 | 5.06 | 14.1 | 11.26 | 16.6 | 17.65 | 21.97 | 22.15  |
| 20481 | 'Ski'        | 2.05  | 2.66  | 2.27 | 9.48 | 3.2  | 0.63  | 4.27 | 1.98  | 1.51  | 3.25   |
| 20482 | 'Skil'       | 6.45  | 6.32  | 3.98 | 11.5 | 6.38 | 6.58  | 3.96 | 2.62  | 5.08  | 10.04  |
| 20491 | 'Sla'        | 0     | 0     | 0.05 | 0    | 0    | 0     | 0    | 0     | 0     | 0      |
| 20492 | 'Slbp'       | 82.44 | 94.17 | 78.9 | 93.8 | 62   | 73.77 | 73.5 | 82.1  | 66.95 | 57.87  |
| 20493 | 'Slc10a1'    | 0.06  | 0.1   | 0.1  | 0.31 | 0.23 | 0.06  | 0.13 | 0.1   | 1.35  | 1.33   |
| 20494 | 'Slc10a2'    | 0     | 0.01  | 0    | 0    | 0.01 | 0     | 0    | 0     | 0     | 0      |
| 20495 | 'Slc12a1'    | 0     | 0     | 0    | 0    | 0    | 0     | 0.89 | 0     | 0     | 0      |
| 20496 | 'Slc12a2'    | 0.03  | 0.04  | 1.42 | 6.14 | 1.25 | 0.4   | 0.71 | 0     | 1.39  | 1.08   |
| 20497 | 'Slc12a3'    | 0     | 0     | 0    | 0    | 0.04 | 1.45  | 0    | 0.15  | 0     | 0      |
| 20498 | 'Slc12a4'    | 2.18  | 0.67  | 10.5 | 7.64 | 0.01 | 0.02  | 8.81 | 2.85  | 4.97  | 0      |
| 20499 | 'Slc12a7'    | 1.02  | 0.01  | 0.01 | 0.51 | 9.52 | 3.72  | 0.01 | 0     | 0     | 10.58  |
| 20501 | 'Slc16a1'    | 5.83  | 6.49  | 7.31 | 6.23 | 7.35 | 1.68  | 0.02 | 0.73  | 7.66  | 1.29   |
| 20502 | 'Slc16a2'    | 0     | 5.78  | 2.48 | 8.14 | 3.09 | 0.86  | 2.69 | 1.99  | 5.33  | 3.32   |
| 20503 | 'Slc16a7'    | 1.18  | 0.38  | 1.58 | 1.24 | 0.12 | 0.09  | 5.48 | 1.37  | 0.12  | 1.66   |
| 20509 | 'Slc19a1'    | 15.01 | 12.4  | 32.1 | 0    | 9.53 | 23.4  | 15.4 | 12.02 | 18.44 | 14.44  |
| 20510 | 'Slc1a1'     | 23.53 | 13.01 | 31.8 | 15.9 | 11.9 | 12.75 | 5.51 | 13.59 | 11.17 | 11.11  |
| 20511 | 'Slc1a2'     | 10.31 | 8.83  | 6.79 | 7.74 | 6.39 | 6.17  | 16.9 | 3.14  | 7.92  | 6.39   |
| 20512 | 'Slc1a3'     | 87.98 | 66.67 | 39.7 | 101  | 22.5 | 45.73 | 41.7 | 29.26 | 43.22 | 39.61  |
| 20513 | 'Slc1a6'     | 9.16  | 4.49  | 6.95 | 7.41 | 6.11 | 7.08  | 3.11 | 11.95 | 10.27 | 1.92   |
| 20514 | 'Slc1a5'     | 0     | 0     | 0.53 | 0    | 1.58 | 1.37  | 0    | 1.31  | 3.64  | 0      |
| 20515 | 'Slc20a1'    | 13.51 | 17.1  | 22   | 28.7 | 8.55 | 11.68 | 5.37 | 19.51 | 22.63 | 25.21  |
| 20516 | 'Slc20a2'    | 12.89 | 14.58 | 13.8 | 6.45 | 6.64 | 8.97  | 14.7 | 8.67  | 13.12 | 15.75  |
| 20517 | 'Slc22a1'    | 0     | 0     | 0    | 0    | 0    | 1.01  | 0    | 0     | 0     | 0      |
| 20518 | 'Slc22a2'    | 0     | 0.38  | 0    | 1.17 | 0    | 0     | 0    | 0     | 0     | 0.34   |
| 20519 | 'Slc22a3'    | 0     | 4.23  | 2.89 | 0    | 0.03 | 0     | 0    | 1.15  | 0.63  | 0      |
| 20520 | 'Slc22a5'    | 2.92  | 2.59  | 0    | 1.31 | 0.09 | 0.05  | 1.94 | 4.52  | 7.51  | 10.88  |
| 20521 | 'Slc22a12'   | 0.16  | 0     | 0    | 0    | 0    | 0     | 0    | 0     | 0     | 0      |
| 20522 | 'Slc23a1'    | 0.92  | 0.22  | 0.19 | 0.14 | 0.13 | 0.06  | 0.19 | 0.08  | 0.2   | 0.19   |
| 20523 | 'Slc25a14'   | 117.6 | 93.99 | 71.9 | 85   | 67.6 | 49.55 | 83.4 | 76.75 | 125.4 | 108.02 |
| 20524 | 'Slc25a17'   | 58.08 | 65.61 | 47.8 | 39.3 | 59.3 | 36.46 | 50.1 | 83.26 | 52.91 | 21.38  |
| 20525 | 'Slc2a1'     | 21.72 | 34.64 | 33.5 | 4.91 | 26.7 | 30.59 | 26.3 | 19.04 | 0.02  | 23.43  |
| 20526 | 'Slc2a2'     | 0     | 0     | 0    | 0.02 | 0    | 0     | 2.32 | 0     | 0     | 0      |
| 20527 | 'Slc2a3'     | 18.49 | 18.97 | 43.7 | 21.5 | 23.4 | 16.85 | 9.52 | 20.01 | 37.7  | 47.08  |
| 20528 | 'Slc2a4'     | 0     | 0     | 0.07 | 0.05 | 0.02 | 0.02  | 0.02 | 0     | 0.02  | 0.04   |

|       |            |       |       |      |      |      |       |      |       |       |         |
|-------|------------|-------|-------|------|------|------|-------|------|-------|-------|---------|
| 20529 | 'Slc31a1'  | 9.57  | 12.73 | 13.4 | 6.67 | 7.83 | 9.73  | 0    | 6.44  | 11.02 | 8.11    |
| 20530 | 'Slc31a2'  | 6.27  | 6.71  | 7.64 | 0.62 | 0.03 | 4.89  | 4.48 | 12.22 | 4.56  | 15.51   |
| 20532 | 'Slc3a1'   | 0     | 0     | 0    | 0    | 0    | 0     | 0.06 | 0     | 0     | 0.05    |
| 20534 | 'Slc4a1ap' | 26.35 | 18.13 | 14.1 | 2.93 | 11.9 | 25.26 | 18.6 | 16.07 | 11.97 | 23.7    |
| 20535 | 'Slc4a2'   | 3.16  | 1.76  | 0.83 | 0    | 1.37 | 1.22  | 2.8  | 0.42  | 3.64  | 3.77    |
| 20536 | 'Slc4a3'   | 16.8  | 16.76 | 23.8 | 3.62 | 21.9 | 10.26 | 17.4 | 9.91  | 6.63  | 3.55    |
| 20538 | 'Slc6a2'   | 0.01  | 0     | 0.01 | 0.01 | 0.01 | 0     | 0    | 0     | 0.01  | 0       |
| 20539 | 'Slc7a5'   | 1.09  | 0.36  | 1.3  | 2.67 | 0.58 | 2.51  | 4.53 | 2.39  | 6.52  | 0.88    |
| 20540 | 'Slc7a7'   | 0     | 3.37  | 0.24 | 0    | 0    | 5.68  | 0    | 2.26  | 0     | 0       |
| 20541 | 'Slc8a1'   | 4.91  | 2.97  | 4.85 | 2.24 | 10.3 | 5.84  | 5.06 | 4.09  | 4.88  | 0.99    |
| 20544 | 'Slc9a1'   | 1.97  | 3.46  | 8.02 | 5.48 | 1.86 | 3.93  | 3.38 | 4.38  | 0.56  | 2.89    |
| 20556 | 'Slnf2'    | 1.07  | 0     | 0.03 | 0    | 0    | 0     | 0    | 0     | 0     | 0       |
| 20562 | 'Slit1'    | 15.94 | 29.39 | 9.46 | 0.04 | 12.3 | 13.03 | 15.1 | 18.42 | 30.16 | 28.84   |
| 20563 | 'Slit2'    | 0.4   | 0.05  | 1.2  | 1.91 | 2.38 | 0.58  | 1.11 | 1.02  | 3.39  | 1.64    |
| 20564 | 'Slit3'    | 1.24  | 1.07  | 0.22 | 0.35 | 1.93 | 0     | 0.37 | 2.08  | 0.02  | 0.3     |
| 20583 | 'Snai2'    | 0.02  | 3.06  | 0.22 | 5.5  | 0    | 0.3   | 0    | 0     | 1.3   | 0       |
| 20585 | 'Hltf'     | 4.08  | 2.1   | 2.47 | 1.35 | 1.62 | 2.07  | 5.02 | 6.26  | 7.3   | 6.9     |
| 20586 | 'Smarca4'  | 13.82 | 23.41 | 19.8 | 11.6 | 34.2 | 22.55 | 30.1 | 24.38 | 24.07 | 26.68   |
| 20587 | 'Smarcb1'  | 89.34 | 93.08 | 124  | 118  | 68.2 | 97.89 | 79.5 | 125.5 | 74.56 | 83.83   |
| 20588 | 'Smarcc1'  | 1.07  | 3.25  | 2.6  | 5.53 | 1.79 | 3.28  | 1.96 | 3.89  | 6.2   | 2.18    |
| 20589 | 'Ighmbp2'  | 4.68  | 2.19  | 6.09 | 0.23 | 0.02 | 9.12  | 9.13 | 6.64  | 0.04  | 1.54    |
| 20591 | 'Kdm5c'    | 1.38  | 3.5   | 3.61 | 10.8 | 3.75 | 1.19  | 2.45 | 1.8   | 6.66  | 5.32    |
| 20592 | 'Kdm5d'    | 2.34  | 1.55  | 0.02 | 0    | 2.04 | 0.42  | 9.69 | 1.85  | 0.9   | 2.76    |
| 20595 | 'Smn1'     | 18.83 | 10.01 | 21.2 | 25.7 | 14.5 | 13.4  | 18.2 | 17.29 | 18.81 | 16.69   |
| 20597 | 'Smpd1'    | 123.7 | 107.3 | 79.9 | 67.4 | 101  | 133   | 142  | 97.35 | 112.5 | 111.23  |
| 20598 | 'Smpd2'    | 29.36 | 30.94 | 22.2 | 29.7 | 0.18 | 46.37 | 12.9 | 30.69 | 26.48 | 46.37   |
| 20602 | 'Ncor2'    | 4.45  | 3.12  | 7.43 | 6.58 | 5.7  | 2.65  | 3.53 | 2.99  | 3.89  | 3.05    |
| 20603 | 'Sms'      | 22.96 | 16.86 | 56.1 | 37.6 | 25.2 | 6.46  | 34.7 | 28.29 | 29.68 | 19.61   |
| 20604 | 'Sst'      | 0.24  | 0     | 0.17 | 0.62 | 8.1  | 0.08  | 428  | 5.11  | 2.12  | 17.23   |
| 20605 | 'Sstr1'    | 5.99  | 15.78 | 16.3 | 3.7  | 6.48 | 3.91  | 28.2 | 15.07 | 5.59  | 5.31    |
| 20606 | 'Sstr2'    | 7.96  | 22.2  | 15   | 10.1 | 0.04 | 6.78  | 5.85 | 6.69  | 20.23 | 3.28    |
| 20607 | 'Sstr3'    | 1.19  | 0     | 0    | 3.17 | 1    | 0.35  | 3.68 | 0     | 0     | 0       |
| 20608 | 'Sstr4'    | 0     | 0     | 1.02 | 0    | 0    | 0.07  | 0    | 0     | 1.51  | 0       |
| 20609 | 'Sstr5'    | 5.77  | 0     | 6.39 | 7.85 | 2.9  | 2.78  | 0.04 | 0     | 0     | 2.52    |
| 20610 | 'Sumo3'    | 132.1 | 116.3 | 158  | 182  | 132  | 166.7 | 124  | 113.9 | 137.5 | 133.66  |
| 20611 | 'Ssty1'    | 0     | 0     | 0.19 | 0    | 0    | 0     | 0    | 0     | 0     | 0       |
| 20613 | 'Snai1'    | 0     | 0     | 0    | 5.61 | 0    | 0     | 0    | 0     | 1.66  | 0.5     |
| 20614 | 'Snap25'   | 802   | 656.4 | 810  | 563  | 1257 | 907.8 | 865  | 1180  | 877.3 | 861.84  |
| 20615 | 'Snapin'   | 65.22 | 53.87 | 38.9 | 60.9 | 65.5 | 82.48 | 61.7 | 45.09 | 61.05 | 54.47   |
| 20616 | 'Snap91'   | 50.52 | 39.68 | 34.2 | 25.8 | 40.3 | 24.3  | 52.1 | 44.96 | 38.05 | 23.33   |
| 20617 | 'Snca'     | 88.22 | 194.6 | 120  | 45.4 | 285  | 151.1 | 219  | 276.5 | 92.42 | 55.63   |
| 20618 | 'SnCG'     | 15.78 | 9.06  | 14.8 | 9.99 | 21.3 | 129.9 | 78.6 | 0     | 54.18 | 104.13  |
| 20619 | 'Snap23'   | 4.89  | 6     | 9.8  | 0.06 | 1.65 | 6.8   | 4.72 | 1.88  | 0.84  | 0.75    |
| 20620 | 'Plk2'     | 27.19 | 35.11 | 47.9 | 137  | 14.5 | 37.8  | 36.6 | 30.56 | 44.08 | 40.73   |
| 20621 | 'Snn'      | 10.39 | 9.1   | 14.3 | 11.5 | 4.59 | 5.6   | 21.2 | 8.23  | 14.5  | 4.07    |
| 20623 | 'Snrk'     | 31.36 | 42.08 | 48.9 | 21.3 | 21.8 | 18.74 | 55.8 | 26.16 | 44.66 | 14.08   |
| 20624 | 'Eftud2'   | 34.95 | 32.21 | 29.9 | 24.5 | 26.8 | 14.97 | 33.9 | 30.06 | 26.72 | 40.28   |
| 20630 | 'Snrpc'    | 99.07 | 63.38 | 98.1 | 132  | 93.1 | 83.19 | 94.7 | 53.75 | 76.68 | 95.87   |
| 20637 | 'Snrrp70'  | 72.96 | 85.49 | 71.2 | 66   | 85.3 | 65.44 | 61.8 | 61.97 | 78.26 | 83.6    |
| 20638 | 'Snrpb'    | 138.4 | 113.2 | 136  | 209  | 186  | 203.8 | 152  | 129.2 | 131.3 | 115.68  |
| 20639 | 'Snrpb2'   | 18.95 | 18.45 | 24.7 | 30.3 | 31.1 | 17.41 | 27.1 | 32.58 | 37.66 | 26.36   |
| 20641 | 'Snrpd1'   | 145.1 | 148.6 | 140  | 157  | 113  | 172.8 | 140  | 138   | 150   | 122.91  |
| 20643 | 'Snrpe'    | 216   | 166.9 | 167  | 189  | 146  | 239.9 | 177  | 139.6 | 102.6 | 139.73  |
| 20646 | 'Snrpn'    | 1409  | 1302  | 1144 | 1605 | 1764 | 1798  | 1351 | 1781  | 1407  | 1473.64 |
| 20648 | 'Snta1'    | 3.16  | 3.75  | 3.93 | 7.19 | 7.75 | 7.44  | 5.61 | 2.63  | 0.79  | 0.14    |
| 20649 | 'Sntb1'    | 0     | 0.56  | 0    | 0    | 0    | 0     | 0    | 0     | 0     | 0       |
| 20650 | 'Sntb2'    | 0.01  | 0.31  | 1.63 | 0    | 0.08 | 0.01  | 2.64 | 0.12  | 0     | 0       |
| 20652 | 'Soat1'    | 2.95  | 1.81  | 0.1  | 1.19 | 0.46 | 0.45  | 0.43 | 0.1   | 0.57  | 0.43    |



|        |             |       |       |      |      |      |       |      |       |       |         |
|--------|-------------|-------|-------|------|------|------|-------|------|-------|-------|---------|
| 20655  | 'Sod1'      | 1268  | 1150  | 1457 | 1762 | 1601 | 1054  | 1064 | 969.1 | 1196  | 1212.54 |
| 20656  | 'Sod2'      | 61.16 | 62.17 | 62.7 | 69.9 | 68.8 | 73.76 | 55.4 | 53.96 | 47.54 | 45.62   |
| 20657  | 'Sod3'      | 2.89  | 1.88  | 2.17 | 0    | 0    | 0     | 0    | 0     | 0     | 0       |
| 20658  | 'Son'       | 18.27 | 19.32 | 19   | 45.9 | 24.2 | 38.07 | 20.8 | 9.57  | 23.88 | 15.1    |
| 20660  | 'Sorl1'     | 4     | 2.07  | 4.45 | 6.12 | 3.29 | 1.27  | 3.7  | 2.7   | 3.8   | 0.52    |
| 20661  | 'Sort1'     | 4.69  | 0.61  | 2.41 | 2.48 | 8.56 | 2.53  | 7.28 | 2.46  | 1.25  | 2.34    |
| 20662  | 'Sos1'      | 2.18  | 1.58  | 2.21 | 8.61 | 1.72 | 3.16  | 1.62 | 1.82  | 2.7   | 2.62    |
| 20663  | 'Sos2'      | 1.49  | 1.73  | 2.01 | 7.93 | 0.56 | 1.97  | 1.05 | 3.46  | 0.48  | 2.68    |
| 20664  | 'Sox1'      | 0.76  | 0     | 0.62 | 0.01 | 0.79 | 0.23  | 0.04 | 0     | 0     | 0       |
| 20665  | 'Sox10'     | 0     | 4.66  | 1.62 | 0    | 0.34 | 0     | 7.57 | 3.09  | 0     | 0.08    |
| 20666  | 'Sox11'     | 7.64  | 6.5   | 7.53 | 10.3 | 4.68 | 7.78  | 6.99 | 15.71 | 5.2   | 8.51    |
| 20667  | 'Sox12'     | 1.28  | 0.04  | 0.03 | 1.4  | 0.03 | 0.02  | 1.15 | 0.71  | 0.29  | 1.43    |
| 20668  | 'Sox13'     | 0     | 0.91  | 1.1  | 0.06 | 1    | 1.8   | 2.83 | 0.59  | 0.7   | 3.74    |
| 20669  | 'Sox14'     | 0     | 0     | 0    | 0    | 0    | 0     | 0    | 3.09  | 0     | 0.02    |
| 20672  | 'Sox18'     | 0.66  | 0     | 0    | 0    | 0.03 | 0     | 0    | 0     | 0     | 0       |
| 20674  | 'Sox2'      | 2.06  | 5.56  | 1.79 | 7.56 | 1.67 | 1.18  | 2.24 | 7.73  | 0.43  | 3.13    |
| 20675  | 'Sox3'      | 1.43  | 0.77  | 2.05 | 0    | 0.93 | 2.76  | 0    | 0.95  | 1.64  | 0.5     |
| 20677  | 'Sox4'      | 1.87  | 1.28  | 0.45 | 7.47 | 0.94 | 0.59  | 2.76 | 1.6   | 0.46  | 0.81    |
| 20678  | 'Sox5'      | 4.76  | 0.41  | 8.48 | 4.17 | 0.14 | 0.77  | 1.06 | 2.74  | 1.37  | 5.4     |
| 20679  | 'Sox6'      | 1.11  | 2.46  | 2.7  | 0.58 | 0.96 | 0.98  | 5.65 | 1.45  | 0     | 0.07    |
| 20680  | 'Sox7'      | 0     | 0.7   | 0    | 2.72 | 0    | 0     | 0    | 0     | 0     | 0       |
| 20681  | 'Sox8'      | 13.24 | 5.17  | 27.4 | 6.45 | 2.88 | 16.6  | 49.2 | 13.1  | 0     | 3.68    |
| 20682  | 'Sox9'      | 15.61 | 12.59 | 1.72 | 20.7 | 3.17 | 14.48 | 4.9  | 3.53  | 2.15  | 5.73    |
| 20683  | 'Sp1'       | 0.76  | 0.19  | 0.84 | 0.52 | 0.02 | 0.02  | 0.01 | 0.09  | 0.73  | 0.78    |
| 20684  | 'Sp100'     | 0     | 0.63  | 0.02 | 0.03 | 0    | 0     | 0.07 | 0     | 0.04  | 0       |
| 20686  | 'Spa17'     | 10.89 | 8.6   | 2.34 | 7.57 | 32.6 | 13.65 | 6.3  | 8.4   | 11.8  | 8.09    |
| 20687  | 'Sp3'       | 5.53  | 7.27  | 3.18 | 0.87 | 3.21 | 0.27  | 5.69 | 1.18  | 4.37  | 1.93    |
| 20688  | 'Sp4'       | 0.21  | 0.9   | 1.42 | 8.35 | 2.15 | 0.54  | 5.02 | 1.01  | 0.86  | 3.42    |
| 20689  | 'Sall3'     | 0     | 0.12  | 2.09 | 0.29 | 0    | 0.42  | 0.04 | 0.13  | 0.01  | 0       |
| 20692  | 'Sparc'     | 258.7 | 153.6 | 146  | 192  | 154  | 335.7 | 211  | 116   | 113   | 132.06  |
| 20698  | 'Sphk1'     | 0     | 0.43  | 1.08 | 0    | 0    | 0     | 0    | 0     | 0     | 1.04    |
| 20700  | 'Serpina1a' | 2.66  | 0     | 0    | 0    | 0    | 0     | 0    | 0     | 0     | 0       |
| 20703  | 'Serpina1d' | 4.49  | 0     | 0    | 0    | 0    | 0     | 0    | 0     | 0     | 0       |
| 20708  | 'Serpina6b' | 0     | 0     | 0.03 | 0    | 0    | 0     | 0.06 | 0     | 0.02  | 2.49    |
| 20713  | 'Serpini1'  | 136.4 | 91.6  | 39.6 | 46.5 | 69.8 | 33.14 | 113  | 58.3  | 53.27 | 81.25   |
| 20715  | 'Serpina3g' | 0     | 0     | 0.27 | 0    | 0    | 0     | 0    | 0     | 0     | 0       |
| 20716  | 'Serpina3n' | 26.03 | 5.45  | 11.7 | 0    | 22.3 | 3.14  | 4.23 | 44.3  | 19.73 | 4.58    |
| 207165 | 'Bptf'      | 5.43  | 5.11  | 3.6  | 11   | 6.18 | 4.18  | 6.67 | 3.02  | 3.2   | 8.08    |
| 207175 | 'Cetn4'     | 16.54 | 9.87  | 11.2 | 29   | 24.7 | 9.25  | 11.2 | 11.98 | 10.79 | 15.96   |
| 207181 | 'Rbms3'     | 27.41 | 5.93  | 9.11 | 8.96 | 12.1 | 5.26  | 4.59 | 6.3   | 10.2  | 18.36   |
| 207182 | 'Ggt7'      | 59.14 | 45.86 | 115  | 47.5 | 64.1 | 65.12 | 71.3 | 102.3 | 61.49 | 67.78   |
| 20719  | 'Serpina6a' | 34.13 | 28.14 | 33.2 | 53.5 | 46.7 | 44.24 | 20.7 | 30.99 | 42.79 | 25.96   |
| 20720  | 'Serpine2'  | 113   | 141.6 | 241  | 139  | 28.9 | 139.1 | 197  | 204.7 | 113.1 | 46.24   |
| 207212 | 'Arhgef17'  | 3.41  | 3.35  | 3.74 | 13.2 | 6.03 | 3.39  | 5.72 | 5.33  | 4.85  | 5.94    |
| 207214 | 'Larp4'     | 3.56  | 3.9   | 6.78 | 3.61 | 3.74 | 0.79  | 3.77 | 2.99  | 3.84  | 4.62    |
| 207215 | 'Fbxo40'    | 0.02  | 0     | 0.03 | 0    | 0    | 0.01  | 0    | 1.08  | 0     | 0.01    |
| 207227 | 'Stxbp5l'   | 3.35  | 2.16  | 2.44 | 3.44 | 3.16 | 1.95  | 3.8  | 2.29  | 4.97  | 3.57    |
| 20723  | 'Serpina9'  | 0     | 5.61  | 3.85 | 7.77 | 7.42 | 0     | 0.04 | 8.07  | 0     | 2.62    |
| 207259 | 'Zbtb7c'    | 10.8  | 1.02  | 1.01 | 0.91 | 3.48 | 1.31  | 2.22 | 0.99  | 0.01  | 1.43    |
| 207278 | 'Fchs2'     | 9.09  | 13.44 | 6.85 | 16.7 | 7.4  | 5.52  | 5.87 | 8.69  | 2.21  | 4.33    |
| 20729  | 'Spin1'     | 42.12 | 26.97 | 36.9 | 51.1 | 23.6 | 17.81 | 21.5 | 25.74 | 35.95 | 18.65   |
| 207304 | 'Hectd1'    | 4.25  | 5.89  | 4.31 | 8.24 | 5.43 | 3.53  | 4.3  | 4.98  | 4.86  | 3.45    |
| 20732  | 'Spint1'    | 6.53  | 5.22  | 0.66 | 6.67 | 24.5 | 30.53 | 5.82 | 1.04  | 26.8  | 4.43    |
| 20733  | 'Spint2'    | 280.4 | 443.6 | 230  | 680  | 262  | 314.2 | 144  | 227.1 | 466   | 365     |
| 207352 | 'Sec23ip'   | 10.95 | 13.88 | 15.3 | 12.4 | 13   | 3.02  | 12.2 | 11.77 | 5.49  | 10.4    |
| 207375 | 'Fam120c'   | 2.89  | 2.46  | 2.28 | 2.32 | 1.93 | 0.15  | 2.51 | 1.88  | 6.89  | 2.98    |
| 207393 | 'Elfn2'     | 0.47  | 0.42  | 3.23 | 0.57 | 3.89 | 2.46  | 0.71 | 1.13  | 1.1   | 3.6     |
| 20740  | 'Sptan1'    | 9.3   | 14.36 | 23.1 | 21.8 | 15.4 | 7.1   | 19.3 | 13.39 | 10.78 | 17.67   |

|        |                 |       |       |      |      |      |       |      |       |       |        |
|--------|-----------------|-------|-------|------|------|------|-------|------|-------|-------|--------|
| 20741  | 'Sptb'          | 1.67  | 1.3   | 2.76 | 0.56 | 0.08 | 1.05  | 2.96 | 1.51  | 1.94  | 0.83   |
| 20742  | 'Sptbn1'        | 11.44 | 11.63 | 8.06 | 19   | 22.8 | 13.91 | 10.5 | 13.8  | 15.21 | 11.75  |
| 207425 | 'Wdr11'         | 5.59  | 7.36  | 9.48 | 9.32 | 11.2 | 2.42  | 9.09 | 7.17  | 12.8  | 9.32   |
| 20743  | 'Sptbn2'        | 3.17  | 4.76  | 3.71 | 3.2  | 4.18 | 3.73  | 5.17 | 1.49  | 0.98  | 7.85   |
| 20744  | 'Strbp'         | 3.89  | 5.35  | 6.62 | 7.07 | 6.7  | 11.87 | 5.17 | 3.9   | 11.43 | 3.29   |
| 20745  | 'Spock1'        | 40.72 | 36.73 | 63.7 | 42.7 | 68.2 | 32.1  | 102  | 110.5 | 97.73 | 25.09  |
| 20747  | 'Spop'          | 61.67 | 81.83 | 55   | 96.3 | 98.3 | 55.36 | 67.2 | 104   | 56.79 | 73.61  |
| 207474 | 'Kctd12b'       | 0     | 0     | 0    | 0    | 4.01 | 2.87  | 3.67 | 0.71  | 0     | 0      |
| 207495 | 'Baiap2l2'      | 0     | 0     | 1.61 | 0    | 0    | 2.07  | 0    | 0     | 0.22  | 0.8    |
| 20750  | 'Spp1'          | 0     | 0     | 13.2 | 0    | 0    | 0     | 0    | 0.57  | 5.78  | 0      |
| 20751  | 'Spr'           | 59.66 | 62.16 | 108  | 110  | 100  | 135.9 | 141  | 103.5 | 98.24 | 145.85 |
| 207521 | 'Dtx4'          | 1.67  | 1.64  | 1.23 | 0.02 | 4.17 | 3.7   | 5.08 | 1.71  | 1.45  | 1.01   |
| 20755  | 'Sprr2a1'       | 0     | 0.01  | 0.01 | 0    | 0    | 0     | 0    | 0     | 0     | 0      |
| 207565 | 'Camkk2'        | 4.82  | 8.36  | 7.84 | 1.75 | 10.1 | 1.87  | 2.25 | 9.8   | 14.17 | 0.24   |
| 207592 | 'Tbc1d16'       | 0.9   | 1.39  | 0.93 | 3.17 | 0.01 | 0     | 0.98 | 0.54  | 1     | 0      |
| 207596 | 'Thsd4'         | 0     | 0     | 0.01 | 0.06 | 0    | 0     | 0    | 0     | 0     | 0.23   |
| 207607 | 'Ccdc40'        | 1.03  | 1.92  | 2.73 | 5.36 | 2.5  | 3.96  | 1    | 1.72  | 4.01  | 4.48   |
| 207615 | 'Wdr37'         | 15.73 | 18.17 | 20.1 | 28.5 | 12   | 9.59  | 7.98 | 17.89 | 16.28 | 19.35  |
| 207618 | 'Zfp804b'       | 0.86  | 2.21  | 2.28 | 3.03 | 0.61 | 0     | 0    | 1.17  | 0     | 1.06   |
| 20768  | 'Sephs2'        | 23.94 | 58.63 | 53.4 | 21.3 | 28.2 | 78.41 | 62.5 | 72.69 | 55.52 | 32.93  |
| 207683 | 'Igsf11'        | 0.46  | 0.06  | 0    | 0.59 | 1.31 | 0.22  | 0.09 | 0.21  | 0.67  | 0.46   |
| 207686 | 'Cfap69'        | 4.44  | 5     | 4.79 | 3.76 | 2.49 | 5.83  | 6.4  | 5.47  | 3.35  | 3.76   |
| 207704 | 'Gtpbp10'       | 1.77  | 1.19  | 1.35 | 1.04 | 5.92 | 2.75  | 0    | 1.58  | 1.68  | 4.11   |
| 207728 | 'Pde2a'         | 47.45 | 36.75 | 17.4 | 24   | 38.4 | 7.18  | 33.2 | 34.59 | 42.5  | 32.96  |
| 20773  | 'Sptlc2'        | 0.98  | 3.19  | 6.59 | 6.39 | 3.26 | 7.15  | 5.53 | 3.16  | 1.58  | 3.4    |
| 207740 | 'Ubald1'        | 73.54 | 99.91 | 70.5 | 35.2 | 90   | 112.4 | 80   | 111   | 82.14 | 75.51  |
| 207742 | 'Rnf43'         | 0     | 0     | 1.19 | 0    | 0    | 0     | 0    | 0     | 0     | 0      |
| 20775  | 'Sqle'          | 48.58 | 57.32 | 56.7 | 33.5 | 48.7 | 42.99 | 52.6 | 70.04 | 37.55 | 41.39  |
| 20776  | 'Tmie'          | 39.24 | 35.03 | 30.7 | 14.3 | 10.7 | 25    | 16.5 | 27.12 | 36.28 | 19.63  |
| 207777 | 'Tspoap1'       | 6.31  | 5.71  | 21.2 | 26   | 18.4 | 7.79  | 10.5 | 8.21  | 11.04 | 6.75   |
| 20778  | 'Scarb1'        | 7.58  | 19.52 | 11.4 | 2.28 | 12.1 | 5.48  | 16.4 | 7.42  | 17.76 | 12.51  |
| 207781 | 'C2cd2'         | 3.19  | 1.5   | 0.79 | 0    | 2.04 | 1.94  | 0.3  | 1.91  | 0.93  | 1.06   |
| 207785 | 'Csrnp2'        | 1.39  | 1.66  | 1.15 | 1.43 | 7.43 | 1.23  | 6.54 | 4.14  | 2.22  | 1.1    |
| 20779  | 'Src'           | 2.6   | 5.5   | 6.67 | 11.4 | 4.67 | 2.98  | 6.87 | 2.21  | 0.11  | 3.59   |
| 207792 | 'BC034090'      | 0.01  | 0.67  | 0.01 | 0.03 | 0.81 | 2.35  | 2.34 | 0     | 0     | 0      |
| 207798 | 'Gramd1c'       | 0.74  | 0.12  | 0.45 | 2.34 | 2.24 | 1.14  | 0.28 | 0.06  | 0.24  | 0.03   |
| 207806 | 'Usf3'          | 0.58  | 0.06  | 0.01 | 1.94 | 0.22 | 0     | 0    | 0.04  | 0     | 0.02   |
| 207819 | '4930539E08Rik' | 1.89  | 1.71  | 1.34 | 0.04 | 0.07 | 2.17  | 0.06 | 0.03  | 0.03  | 1.81   |
| 207839 | 'Galnt6'        | 0.11  | 1.37  | 0    | 0    | 0.02 | 2.04  | 0    | 0     | 0     | 0      |
| 207854 | 'Fmr1nb'        | 0     | 0     | 0    | 0    | 0    | 0     | 0    | 0.36  | 0     | 0      |
| 20787  | 'Srebf1'        | 9.19  | 13.9  | 6.97 | 3.42 | 4.45 | 9.86  | 7.22 | 2.63  | 8.87  | 7.78   |
| 20788  | 'Srebf2'        | 40.34 | 26.84 | 53.8 | 21.7 | 21   | 12.29 | 43.7 | 34.56 | 40.21 | 48.5   |
| 207911 | 'Mchr1'         | 26.7  | 8.64  | 5.16 | 20.2 | 19.7 | 19.36 | 5.62 | 1.96  | 4.83  | 10.88  |
| 207920 | 'Esp1'          | 0     | 0     | 0    | 0.01 | 0    | 0     | 0    | 0     | 0.02  | 0      |
| 207921 | 'Fam228b'       | 4.48  | 3.08  | 0.24 | 0.93 | 0.14 | 8.89  | 0.27 | 1.97  | 0.02  | 3.02   |
| 207932 | 'Urb1'          | 1.18  | 2.92  | 0.99 | 0    | 0    | 0.88  | 0.37 | 1.56  | 1.04  | 0.78   |
| 207952 | 'Klhl25'        | 0     | 2.94  | 4.06 | 0    | 3.97 | 0     | 0    | 0     | 2.28  | 0      |
| 207958 | 'Alg11'         | 11.57 | 18.02 | 10.7 | 7.99 | 24   | 8.52  | 12.1 | 19.02 | 16.92 | 15.31  |
| 207965 | 'Vcpkmt'        | 25.91 | 1.01  | 14.2 | 32.6 | 4.45 | 11.4  | 5.65 | 22.84 | 21.28 | 13.34  |
| 208043 | 'Setd1b'        | 0.84  | 1.26  | 1.33 | 3.93 | 1.03 | 0.76  | 0.22 | 0.89  | 0.44  | 1.23   |
| 20807  | 'Srf'           | 5.29  | 4.63  | 8.47 | 16.6 | 2.55 | 14.71 | 5.52 | 3.43  | 3.84  | 9.02   |
| 208076 | 'Pknox2'        | 8.04  | 3.37  | 16.9 | 2.25 | 4.21 | 9.12  | 12.8 | 3.37  | 14.42 | 14.93  |
| 208080 | 'Ubap1l'        | 5.01  | 5.86  | 7.2  | 3.58 | 6.43 | 7.42  | 6.16 | 2.18  | 6.72  | 2.46   |
| 208084 | 'Pif1'          | 0.01  | 0     | 0    | 0    | 0    | 0     | 0    | 0.01  | 0     | 0      |
| 208092 | 'Chmp6'         | 53.39 | 47.93 | 37.3 | 33.7 | 83.4 | 30.16 | 25.6 | 54.28 | 59.38 | 41.94  |
| 20810  | 'Srm'           | 52.38 | 19.82 | 48.2 | 62.6 | 20.8 | 27.88 | 45.9 | 50.82 | 29.71 | 10.87  |
| 208104 | 'Mlxip'         | 1.73  | 4.31  | 1.6  | 4.89 | 3.2  | 1.81  | 1.43 | 2.34  | 3.83  | 2.15   |
| 208111 | 'Zfp976'        | 3.52  | 0.34  | 2.16 | 0.02 | 1.69 | 0.22  | 0.02 | 0.31  | 4.8   | 0.1    |

|        |            |       |       |      |      |      |       |      |       |       |        |
|--------|------------|-------|-------|------|------|------|-------|------|-------|-------|--------|
| 208117 | 'Aph1b'    | 7.92  | 5.82  | 7.11 | 7.04 | 3.75 | 0.7   | 9.34 | 6.84  | 14.71 | 12.05  |
| 20813  | 'Srp14'    | 422.7 | 410.5 | 368  | 489  | 368  | 463.2 | 386  | 395.7 | 369.2 | 482.2  |
| 208144 | 'Dhx37'    | 1.56  | 2.71  | 2.01 | 5.92 | 3.81 | 0.89  | 0.91 | 5.34  | 1.54  | 5.16   |
| 208146 | 'Yeats2'   | 11.21 | 6.19  | 10.2 | 4.27 | 3.04 | 7.95  | 10.6 | 7.95  | 10.78 | 9.83   |
| 20815  | 'Srpk1'    | 19.51 | 25.74 | 15.9 | 8.69 | 16.8 | 35.48 | 41.5 | 18.53 | 30.21 | 36.28  |
| 208151 | 'Tmem132b' | 1.3   | 2.48  | 1.79 | 6.33 | 0.85 | 1.45  | 6.69 | 1.62  | 2.12  | 2.12   |
| 208154 | 'Btla'     | 0     | 0     | 0    | 0    | 0.32 | 0     | 0    | 1.43  | 0     | 0      |
| 208158 | 'Map6d1'   | 1.93  | 10.04 | 10.9 | 13.6 | 4.2  | 2.67  | 7.73 | 4.05  | 3.58  | 0      |
| 208169 | 'Slc9c1'   | 0.02  | 0     | 0    | 0    | 0    | 0     | 0    | 0     | 0     | 0      |
| 20817  | 'Srpk2'    | 57.12 | 38.84 | 44   | 60.9 | 41.5 | 50.72 | 36.8 | 37.15 | 44.57 | 41.06  |
| 208171 | 'Tmprss7'  | 0     | 0.11  | 0    | 0.12 | 0.04 | 0     | 0.6  | 0     | 0     | 0.03   |
| 208177 | 'Phldb2'   | 0     | 0.23  | 0    | 0    | 0    | 0     | 0    | 0.01  | 0     | 0      |
| 20818  | 'Srpbr'    | 51.81 | 41.93 | 25.8 | 34.6 | 31.2 | 34.14 | 36.8 | 32.21 | 45.96 | 60.36  |
| 208188 | 'Ghsr'     | 4.8   | 4.6   | 5    | 0    | 0.2  | 0     | 14.6 | 16.7  | 0     | 0      |
| 208194 | 'Exog'     | 18.83 | 11.67 | 10.5 | 0.03 | 10.1 | 12.45 | 10.5 | 17.54 | 16.39 | 9.46   |
| 208198 | 'Btbd2'    | 10.65 | 4.58  | 1.72 | 10.4 | 23.4 | 10.19 | 1.33 | 8.46  | 5.75  | 7.11   |
| 208211 | 'Alg1'     | 47.18 | 55.22 | 34.9 | 41.8 | 37.9 | 66.76 | 48.1 | 40.97 | 39.06 | 34.75  |
| 208213 | 'Tmem132c' | 0.02  | 0.99  | 0.78 | 1.86 | 0.02 | 1.73  | 1.99 | 1.83  | 0.01  | 0.24   |
| 20822  | 'Trove2'   | 10.52 | 6     | 4.39 | 11.7 | 5.57 | 4.73  | 6.23 | 10.69 | 6.54  | 4.05   |
| 208228 | 'Mob3a'    | 15.17 | 17.33 | 19.2 | 17.6 | 12.1 | 15.32 | 16.7 | 19.29 | 10.32 | 30.11  |
| 20823  | 'Ssb'      | 107.8 | 86.57 | 84.3 | 120  | 81.2 | 103.4 | 108  | 84.67 | 85.52 | 70.19  |
| 208258 | 'Ankrd33'  | 0     | 0     | 0    | 0    | 0    | 0.54  | 0    | 0.67  | 0     | 0      |
| 20826  | 'Snu13'    | 342.8 | 334.4 | 286  | 248  | 262  | 287.1 | 268  | 284.1 | 290   | 327.05 |
| 208263 | 'Tor1aip1' | 2.91  | 7.55  | 4.03 | 4.61 | 6.96 | 0.97  | 5.63 | 5.7   | 0.85  | 2.83   |
| 208266 | 'Dot1l'    | 2.7   | 1.03  | 2.29 | 6.72 | 1.65 | 3.15  | 1.25 | 0.37  | 2.46  | 1.56   |
| 208285 | 'Cyp4f17'  | 7.52  | 0.84  | 5.58 | 2.74 | 3.92 | 4.11  | 6.14 | 8.52  | 5.12  | 8.01   |
| 208292 | 'Zfp871'   | 6.24  | 4.06  | 5.83 | 1    | 5.8  | 3.46  | 6.82 | 2.45  | 6.71  | 5.26   |
| 20832  | 'Ssr4'     | 193.3 | 318.7 | 184  | 281  | 130  | 428.8 | 161  | 191.7 | 241.7 | 429.06 |
| 20833  | 'Ssrp1'    | 24.24 | 27.59 | 40   | 52.6 | 36   | 20.19 | 55.4 | 41.09 | 39.78 | 33.65  |
| 20834  | 'Znrf4'    | 0     | 0     | 0    | 0.05 | 0    | 0     | 0    | 0     | 0     | 0      |
| 208366 | 'Rpp40'    | 0.05  | 8.52  | 3.78 | 3.68 | 8.24 | 0.23  | 0    | 9.02  | 1.8   | 3.71   |
| 208372 | 'Asb18'    | 0.99  | 0     | 0    | 0    | 0    | 0     | 0    | 0     | 0     | 0      |
| 20840  | 'Stac'     | 0.02  | 2.71  | 7.41 | 0    | 1.98 | 0     | 0    | 3.85  | 10.37 | 0      |
| 20841  | 'Zfp143'   | 3.83  | 1.95  | 3.38 | 4.79 | 4.19 | 1.38  | 6.79 | 2.36  | 5.01  | 0.83   |
| 20842  | 'Stag1'    | 1.4   | 2.17  | 3.53 | 1.8  | 0.99 | 0.72  | 2.3  | 3.6   | 3.91  | 4.43   |
| 208426 | 'lqcj'     | 0     | 0     | 0    | 0    | 0.67 | 1     | 5.25 | 0     | 0     | 0      |
| 20843  | 'Stag2'    | 1.33  | 1.01  | 1.6  | 4.32 | 0.46 | 2.37  | 3.57 | 1.58  | 1.33  | 9.94   |
| 208431 | 'Shroom4'  | 0     | 0     | 0.2  | 0    | 0    | 0     | 0    | 0     | 0     | 0      |
| 208439 | 'Klhl29'   | 1.76  | 1.07  | 0.28 | 0.19 | 2.91 | 2.36  | 1.83 | 2.73  | 3.67  | 1.34   |
| 20844  | 'Stam'     | 23.89 | 32.04 | 32.5 | 13.5 | 22   | 9.23  | 26.2 | 32.15 | 33.81 | 23.72  |
| 208440 | 'Dip2c'    | 2.1   | 0.37  | 1.08 | 8.5  | 2.37 | 1.34  | 0.61 | 1.54  | 1.36  | 2.03   |
| 208449 | 'Sgms1'    | 4.26  | 6.14  | 4.92 | 3.76 | 1.73 | 4.64  | 5.44 | 3.99  | 7.85  | 5.77   |
| 20845  | 'Star'     | 1.55  | 2.09  | 0.44 | 1.04 | 1.42 | 0.09  | 2.39 | 0.5   | 0.36  | 0      |
| 20846  | 'Stat1'    | 15.34 | 5.55  | 10.7 | 45.3 | 10.8 | 12    | 9.58 | 7.27  | 12.82 | 15.62  |
| 20847  | 'Stat2'    | 4.92  | 1.21  | 3.98 | 11.7 | 1.59 | 4.33  | 2.68 | 2.11  | 8.5   | 2.47   |
| 20848  | 'Stat3'    | 23.18 | 19.13 | 20.6 | 31.3 | 26.7 | 17.51 | 27.3 | 15.29 | 41    | 27.95  |
| 20849  | 'Stat4'    | 0     | 0     | 0    | 0    | 0    | 0     | 0    | 0.02  | 0.02  | 0      |
| 20850  | 'Stat5a'   | 2.2   | 4.78  | 0.69 | 6.28 | 0.03 | 1.09  | 0    | 0     | 6.13  | 1.51   |
| 208501 | 'Ndufaf8'  | 76.83 | 30.6  | 29.4 | 62.1 | 87   | 138   | 70   | 47.63 | 71.78 | 50.86  |
| 20851  | 'Stat5b'   | 6.29  | 7.11  | 9.64 | 1.85 | 13.7 | 9.25  | 18.2 | 11.17 | 9.25  | 8.13   |
| 208518 | 'Cep78'    | 1.15  | 3.81  | 2.96 | 6.72 | 0.48 | 1.44  | 5.1  | 1.87  | 4.29  | 2.31   |
| 20852  | 'Stat6'    | 0     | 0     | 0.83 | 0.01 | 5.3  | 4.41  | 0    | 0     | 15.98 | 4.56   |
| 20853  | 'Stau1'    | 8.72  | 18.36 | 20   | 8.78 | 25.7 | 6.65  | 18   | 15.94 | 22.03 | 15.78  |
| 20855  | 'Stc1'     | 4.96  | 12.48 | 14.2 | 10.4 | 5.74 | 4.68  | 5.32 | 13.17 | 1.66  | 5.73   |
| 20856  | 'Stc2'     | 0     | 0     | 0.03 | 11.6 | 0    | 0     | 0    | 1.1   | 0     | 0      |
| 208583 | 'Nek11'    | 0     | 1.45  | 3.36 | 0    | 5.28 | 0     | 0    | 0     | 0     | 0.37   |
| 208595 | 'Mterf1b'  | 0     | 0     | 0    | 0    | 0    | 11.24 | 0    | 0     | 2.52  | 0      |
| 208606 | 'Rsrc2'    | 50.47 | 48.25 | 40.2 | 61.8 | 50   | 42.71 | 45.1 | 42.59 | 53.79 | 40.47  |

|        |            |       |       |      |      |      |       |      |       |       |        |
|--------|------------|-------|-------|------|------|------|-------|------|-------|-------|--------|
| 20861  | 'Stfa1'    | 0     | 0     | 0    | 7.58 | 0    | 0     | 0    | 2.88  | 0     | 0      |
| 208613 | 'Tmem212'  | 0     | 0     | 0    | 0    | 0    | 0     | 0    | 0     | 0.64  | 3.63   |
| 208618 | 'Etl4'     | 0.35  | 1.33  | 6.63 | 0.34 | 1.02 | 1.43  | 0.12 | 0.68  | 5.42  | 0.92   |
| 208624 | 'Alg3'     | 17.97 | 17.89 | 5.78 | 8.62 | 31   | 57.93 | 11   | 14.64 | 3.83  | 10.01  |
| 208628 | 'Kntc1'    | 1.56  | 0.02  | 0    | 0.76 | 0    | 0     | 0    | 0     | 0     | 0      |
| 208638 | 'Slc25a38' | 34.6  | 16.63 | 46.6 | 79.2 | 24.5 | 23.55 | 17   | 19.3  | 23.73 | 19.01  |
| 208643 | 'Eif4g1'   | 11.72 | 11.54 | 16.6 | 35.3 | 10.9 | 16.37 | 15.2 | 10.62 | 17.38 | 14.14  |
| 208647 | 'Creb3l2'  | 1.41  | 1.93  | 0.24 | 7.58 | 3.6  | 0.01  | 0.04 | 0.9   | 0.03  | 2.59   |
| 208650 | 'Cblb'     | 0.95  | 1.07  | 2.47 | 1.29 | 2.29 | 0.22  | 2.63 | 2.32  | 1.42  | 1.16   |
| 208659 | 'Fam20a'   | 5.75  | 2.98  | 16   | 0.8  | 4.27 | 11.3  | 5.3  | 7.31  | 8.79  | 0      |
| 20866  | 'Stim1'    | 26.6  | 23.66 | 26.6 | 8.79 | 13.8 | 13.41 | 8.28 | 12.99 | 12.51 | 11.44  |
| 208665 | 'Akr1d1'   | 0     | 0     | 0    | 0    | 0.02 | 0     | 0    | 0     | 0     | 0.02   |
| 208666 | 'Diras1'   | 15.24 | 11.42 | 24.8 | 1.66 | 19.2 | 18.55 | 19   | 28.78 | 18    | 12.93  |
| 20867  | 'Stip1'    | 279   | 238.9 | 180  | 149  | 160  | 237   | 294  | 215.3 | 270.6 | 331.96 |
| 208677 | 'Creb3l3'  | 0     | 1.95  | 5.23 | 0    | 0    | 0     | 0    | 0     | 0     | 0      |
| 20868  | 'Stk10'    | 0     | 0.44  | 0    | 2.36 | 0    | 0     | 0    | 0     | 0     | 0      |
| 20869  | 'Stk11'    | 9.17  | 9.7   | 5.01 | 6.74 | 11.4 | 0.4   | 3.07 | 1.94  | 12.72 | 4.89   |
| 208691 | 'Eif5a2'   | 2.01  | 5.32  | 12.9 | 0    | 3.25 | 4.54  | 3.42 | 2.91  | 9.24  | 2.52   |
| 20871  | 'Aurkc'    | 0     | 0     | 0    | 0    | 0    | 0     | 1.78 | 2.25  | 0     | 0      |
| 208715 | 'Hmgcs1'   | 68.85 | 72.83 | 73.2 | 30.4 | 75.4 | 34.34 | 71   | 106.7 | 59    | 75.77  |
| 208718 | 'Dis3l2'   | 3.1   | 17.51 | 15.1 | 12.7 | 0.97 | 8.07  | 0.47 | 13.45 | 9.36  | 13.8   |
| 20872  | 'Stk16'    | 54.09 | 46.96 | 55.2 | 45.5 | 69.1 | 80.41 | 21.9 | 52.99 | 33.11 | 65.98  |
| 208727 | 'Hdac4'    | 8.92  | 11.84 | 7.66 | 8.6  | 14.4 | 7.09  | 7.13 | 7.84  | 6.45  | 11.04  |
| 20873  | 'Plk4'     | 0     | 0     | 0.19 | 0    | 0.25 | 0     | 0.7  | 2.64  | 4.01  | 0      |
| 20874  | 'Slk'      | 1     | 1.97  | 0.03 | 1.02 | 1.2  | 1.14  | 0.02 | 1.02  | 0.5   | 0.36   |
| 208748 | 'Prrg3'    | 2.45  | 2.54  | 1.75 | 2.01 | 3.69 | 3.27  | 4.11 | 2     | 1.62  | 1.13   |
| 208760 | 'Aqp12'    | 0     | 0     | 3.28 | 0    | 0    | 0     | 0    | 0     | 0     | 0      |
| 208768 | 'Sde2'     | 10.52 | 12.43 | 13.3 | 13.1 | 18.6 | 10.09 | 15   | 15.26 | 19.02 | 12.01  |
| 208777 | 'Sned1'    | 1.64  | 0.76  | 1.88 | 0    | 1.01 | 3.05  | 0.56 | 0     | 0.24  | 1.12   |
| 20878  | 'Aurka'    | 0     | 1.52  | 0    | 0    | 2.77 | 0     | 0.21 | 0     | 0     | 0      |
| 208795 | 'Tmem63a'  | 2.3   | 6     | 0    | 0    | 2.66 | 6.93  | 0.03 | 2.36  | 0     | 0      |
| 208820 | 'Triqk'    | 17.17 | 14.76 | 15.5 | 11.3 | 19.7 | 23.49 | 12.4 | 9.92  | 17.32 | 14.93  |
| 208836 | 'Fanci'    | 0     | 0.07  | 0.44 | 0.11 | 0.02 | 0.43  | 0    | 0     | 0     | 0      |
| 208846 | 'Daam1'    | 8.9   | 8.82  | 4.75 | 5.81 | 4.33 | 11.79 | 3.46 | 5.35  | 4.55  | 5.32   |
| 208869 | 'Dock3'    | 1.55  | 2.94  | 2.17 | 5    | 6.15 | 4.13  | 2.76 | 3.04  | 3     | 1.8    |
| 20887  | 'Sult1a1'  | 3.35  | 0.88  | 3.5  | 8.28 | 0    | 0     | 3.1  | 0     | 0     | 0      |
| 208884 | 'Zdhhc9'   | 1.35  | 1.26  | 1.32 | 0.19 | 9.17 | 0.12  | 0.81 | 6.58  | 0.03  | 6.36   |
| 208898 | 'Unc13c'   | 1.23  | 4.56  | 1.83 | 0.94 | 1.14 | 2.23  | 9.11 | 0.7   | 2.74  | 0.34   |
| 208908 | 'Ccdc62'   | 0.49  | 1.38  | 0    | 1.74 | 2.16 | 8.12  | 6.73 | 0.77  | 2.59  | 2.38   |
| 20892  | 'Cenpx'    | 70.71 | 24.22 | 63.4 | 47.2 | 22.3 | 52.55 | 98.3 | 40.01 | 51.66 | 61.5   |
| 208922 | 'Cpeb3'    | 2.21  | 6.21  | 13.5 | 3.38 | 2.98 | 1.09  | 5.3  | 1.64  | 6.37  | 4.29   |
| 20893  | 'Bhlhe40'  | 11.85 | 27.12 | 46.5 | 95.3 | 20.1 | 18.33 | 8.63 | 6.86  | 8.6   | 9.51   |
| 208936 | 'Adamts18' | 1.29  | 0.26  | 0.27 | 0    | 0.69 | 0     | 0.74 | 1.61  | 0     | 0      |
| 208943 | 'Myo5c'    | 0     | 0     | 0.14 | 0.02 | 0    | 0.83  | 0    | 0.01  | 0.33  | 0.03   |
| 208967 | 'Thns11'   | 15.26 | 15.33 | 2.94 | 22.6 | 15.3 | 8.18  | 6.06 | 17.95 | 13.83 | 17.17  |
| 208968 | 'Zfp280c'  | 2.87  | 1.39  | 2.29 | 0    | 3.7  | 0.43  | 1.47 | 1.6   | 0.93  | 1.37   |
| 20897  | 'Stra6'    | 0.05  | 0     | 0    | 0    | 0    | 0     | 0.16 | 0     | 0     | 0      |
| 208982 | 'Hmgcll1'  | 15.16 | 8.96  | 9.88 | 6.92 | 8.33 | 2.48  | 17.2 | 8.83  | 4.87  | 4.11   |
| 208990 | 'Npb'      | 2.2   | 2.82  | 0    | 0    | 5.42 | 10.76 | 1.72 | 0.66  | 0     | 0      |
| 208994 | 'Fam83b'   | 0.35  | 0     | 0    | 0    | 0    | 0     | 0    | 0     | 0     | 0      |
| 209003 | 'Rbmx2'    | 8.15  | 4.16  | 8.19 | 19.4 | 10.8 | 8.36  | 7.28 | 7.02  | 9.86  | 5      |
| 20901  | 'Strap'    | 108.9 | 101.6 | 69.8 | 90.5 | 61.5 | 89.79 | 111  | 98.32 | 81.01 | 83.99  |
| 209011 | 'Sirt7'    | 13.88 | 24.93 | 18.5 | 45.7 | 41.4 | 70.19 | 32.6 | 32.23 | 32.73 | 23.19  |
| 209012 | 'Ulk4'     | 5.26  | 0.6   | 2.41 | 2.75 | 7.26 | 0.28  | 3    | 0.73  | 2.67  | 11.2   |
| 209018 | 'Vps8'     | 3.05  | 2.21  | 13.6 | 0.91 | 4.98 | 3.83  | 6.16 | 8.39  | 9.59  | 20.15  |
| 209027 | 'Pycr1'    | 0     | 3.37  | 6.04 | 0    | 7.53 | 0     | 0    | 2.36  | 1.17  | 0      |
| 209032 | 'Zc3hav11' | 1.09  | 0.6   | 0.05 | 0.03 | 0.02 | 0.27  | 0    | 0.04  | 1.09  | 0      |
| 209039 | 'Tns2'     | 0     | 0.13  | 3.73 | 0    | 0    | 0     | 0.01 | 0.01  | 0.68  | 0      |

|        |            |       |       |      |      |      |       |      |       |       |        |
|--------|------------|-------|-------|------|------|------|-------|------|-------|-------|--------|
| 20907  | 'Stx1a'    | 35.26 | 59.64 | 23.8 | 32.4 | 37.6 | 34.94 | 49.4 | 51.23 | 36.93 | 20.79  |
| 20908  | 'Stx3'     | 13.51 | 16.86 | 17.8 | 8.87 | 16.6 | 3.64  | 9.54 | 4.38  | 11.01 | 12.74  |
| 209086 | 'Samd9l'   | 0     | 0.19  | 1.34 | 0.03 | 0    | 0     | 0    | 0     | 0.01  | 0      |
| 20909  | 'Stx4a'    | 11.25 | 14.78 | 23.1 | 22   | 19.3 | 29.24 | 30.9 | 21.46 | 39.93 | 26.92  |
| 20910  | 'Stxbp1'   | 198.3 | 200.9 | 314  | 196  | 134  | 104   | 190  | 204   | 213.8 | 138.74 |
| 20911  | 'Stxbp2'   | 14.28 | 43    | 26   | 47.6 | 38.7 | 75.39 | 6.12 | 21.99 | 77.9  | 77.68  |
| 20912  | 'Stxbp3'   | 13.09 | 9.53  | 2.43 | 5.05 | 3.79 | 5.57  | 5.14 | 0.05  | 6.46  | 5.61   |
| 20913  | 'Stxbp4'   | 12.95 | 4.79  | 3.53 | 0.82 | 1.12 | 14.01 | 4.45 | 10.15 | 7.52  | 18.21  |
| 209131 | 'Snx30'    | 3.41  | 1.71  | 2.42 | 1.59 | 2.52 | 2.95  | 1.06 | 1.53  | 6.46  | 2.08   |
| 20916  | 'Sucla2'   | 171.4 | 150.6 | 160  | 149  | 146  | 199.5 | 125  | 139.5 | 129   | 173.84 |
| 20917  | 'Suclg2'   | 0.05  | 1.27  | 0.03 | 2.39 | 4.33 | 0.01  | 0    | 0     | 3.64  | 2.01   |
| 209176 | 'Ido2'     | 0.05  | 0.64  | 0.65 | 3.84 | 0    | 0.56  | 1.63 | 0.6   | 0     | 1.16   |
| 20918  | 'Eif1'     | 327.4 | 381.2 | 480  | 533  | 433  | 201.8 | 368  | 386.6 | 404.9 | 502.94 |
| 209186 | 'Acnat2'   | 0.07  | 0     | 0    | 0    | 0    | 0     | 0    | 0     | 0.28  | 0      |
| 209195 | 'Clic6'    | 2.67  | 1.99  | 3.52 | 0    | 1.04 | 4.36  | 0    | 0.32  | 5.78  | 1.37   |
| 209200 | 'Dtx3l'    | 0.99  | 1.34  | 1.37 | 0.92 | 0.38 | 0.17  | 0.17 | 0.03  | 0.42  | 3.78   |
| 209212 | 'Osgin2'   | 5.28  | 0.17  | 4.56 | 16.5 | 2.34 | 4.12  | 2.88 | 3.42  | 0     | 0.49   |
| 20922  | 'Supt4a'   | 142.6 | 124   | 143  | 104  | 176  | 233   | 123  | 173.6 | 148.3 | 121.13 |
| 209224 | 'Enox2'    | 3.87  | 10.15 | 4.11 | 9.23 | 1.59 | 2.38  | 0    | 10.34 | 1.71  | 1.66   |
| 209225 | 'Zfp710'   | 2.12  | 0.73  | 0.81 | 0.06 | 1.46 | 4.13  | 0.03 | 0.08  | 1.09  | 0.2    |
| 209239 | 'Gan'      | 0     | 0.25  | 0    | 0    | 1.22 | 0     | 0    | 0.02  | 0     | 4.69   |
| 20924  | 'Supt5'    | 33.77 | 58.29 | 35.7 | 42.6 | 63.9 | 13.07 | 49.7 | 36.17 | 49.33 | 44.69  |
| 20926  | 'Supt6'    | 16.42 | 11    | 22.7 | 16.3 | 13.9 | 7.49  | 19.8 | 9.1   | 13.51 | 12.2   |
| 209268 | 'Igsf1'    | 75.7  | 60.44 | 24.5 | 17.1 | 5.22 | 13.11 | 3.54 | 29.06 | 13.96 | 24.35  |
| 20927  | 'Abcc8'    | 3.1   | 3.79  | 5.96 | 0.01 | 3.6  | 0.64  | 9.29 | 5.74  | 3.77  | 0.01   |
| 20928  | 'Abcc9'    | 0.07  | 0.15  | 0.15 | 0.18 | 0.21 | 0.2   | 0.1  | 0.09  | 0.18  | 0.11   |
| 209294 | 'Csta1'    | 0     | 0     | 0    | 1.78 | 0    | 0     | 0    | 0     | 0     | 0      |
| 20930  | 'Surf1'    | 94.52 | 77.36 | 117  | 122  | 70.8 | 146.4 | 102  | 92.18 | 107.6 | 165.95 |
| 20931  | 'Surf2'    | 53.7  | 26.46 | 36.7 | 30.1 | 49.9 | 57.42 | 14.5 | 21.25 | 45.14 | 30.79  |
| 209318 | 'Gps1'     | 177.2 | 118.4 | 178  | 44.7 | 137  | 151.3 | 153  | 176.3 | 128.1 | 164.12 |
| 20932  | 'Surf4'    | 74.08 | 64.69 | 52.2 | 47.5 | 34.1 | 56.96 | 50.8 | 43.44 | 52.01 | 56.08  |
| 20933  | 'Med22'    | 30.69 | 45.81 | 36.8 | 73.3 | 70.2 | 42.89 | 51.8 | 36.42 | 41.59 | 27.7   |
| 209334 | 'Gen1'     | 0.6   | 0.02  | 0.07 | 0.04 | 1.72 | 0.05  | 2.29 | 0.85  | 0.04  | 0.07   |
| 20935  | 'Surf6'    | 10.23 | 6.79  | 8.21 | 21   | 9.21 | 0.65  | 13.9 | 9.99  | 15.57 | 6.46   |
| 209354 | 'Eif2b1'   | 35.65 | 46.09 | 21.7 | 58.4 | 20.2 | 42.58 | 30.4 | 50.28 | 37.43 | 27.66  |
| 209357 | 'Gtf2h3'   | 7.5   | 7.95  | 8.27 | 0.02 | 13.7 | 6.15  | 8.34 | 8.2   | 2.94  | 3      |
| 209361 | 'Taf3'     | 9.28  | 6.83  | 3.75 | 8.15 | 6.92 | 5.08  | 2.8  | 10.23 | 3.67  | 9.08   |
| 20937  | 'Suv39h1'  | 21.76 | 41.95 | 25.5 | 7.03 | 21.7 | 13.12 | 34.7 | 26.99 | 11.43 | 24.63  |
| 209378 | 'Itih5'    | 0.01  | 0.73  | 0.43 | 0.6  | 0.04 | 2.16  | 0    | 0.7   | 0     | 0      |
| 209387 | 'Trim30d'  | 0     | 0     | 0.01 | 0.21 | 0    | 0     | 0    | 0     | 0     | 0      |
| 209416 | 'Gpkow'    | 15.87 | 10.87 | 30.1 | 9.21 | 20.2 | 7.52  | 24.1 | 20.99 | 24.17 | 16.26  |
| 209446 | 'Tfe3'     | 18.16 | 11.77 | 13.2 | 10.7 | 29.1 | 9.9   | 16.7 | 20.26 | 3.32  | 11.84  |
| 209456 | 'Trp53bp2' | 5.6   | 2.3   | 4.41 | 3.45 | 1.54 | 1.65  | 0.12 | 1.18  | 4.27  | 1.64   |
| 209462 | 'Hace1'    | 4.15  | 5.58  | 1.39 | 14   | 6.23 | 3.75  | 0.06 | 2.99  | 7.26  | 2.21   |
| 20947  | 'Swap70'   | 0.9   | 0     | 0    | 0    | 0    | 0.38  | 3.92 | 0     | 3.45  | 0      |
| 209478 | 'Tbc1d12'  | 0     | 2.12  | 0.96 | 1.06 | 0.77 | 2.59  | 0.55 | 1.08  | 7.01  | 0.83   |
| 209488 | 'Hsh2d'    | 0     | 0.12  | 0    | 0    | 0    | 0     | 0    | 0     | 0     | 0      |
| 209497 | 'Tmem164'  | 1.4   | 0.03  | 0.36 | 0.45 | 4.68 | 5.42  | 0.01 | 0.03  | 6.82  | 6.18   |
| 209540 | 'Rtl9'     | 0.66  | 0.06  | 1.05 | 5.56 | 0.32 | 0.92  | 0.01 | 0.03  | 4.3   | 0.06   |
| 20955  | 'Vamp7'    | 17.65 | 32.26 | 24   | 21   | 19.9 | 10.86 | 28.2 | 20.42 | 30.55 | 33.56  |
| 209550 | 'Rad51ap2' | 0     | 0.67  | 0.03 | 0    | 0.87 | 1.05  | 0    | 0     | 0.99  | 1.14   |
| 209558 | 'Enpp3'    | 0.11  | 0     | 0    | 0    | 0    | 0     | 0    | 0.42  | 0     | 0      |
| 209584 | 'Tyw3'     | 4.02  | 1.91  | 3.03 | 2.68 | 1.84 | 4.76  | 3.22 | 3.57  | 2.04  | 3.54   |
| 209586 | 'Nudcd3'   | 21.12 | 40.31 | 44.4 | 45   | 37.4 | 40.95 | 57.1 | 36.13 | 52.42 | 19.18  |
| 209601 | 'Erich3'   | 3.36  | 4     | 3.09 | 5.82 | 3.44 | 1.09  | 2.67 | 0.92  | 2.67  | 0.19   |
| 20962  | 'Sycp3'    | 11.95 | 0     | 0    | 0    | 0.09 | 5.92  | 0    | 0     | 0     | 3.21   |
| 20963  | 'Syk'      | 0     | 0.2   | 0.01 | 0    | 0    | 1.92  | 0.02 | 0     | 0     | 0      |
| 209630 | 'Frm4a'    | 4.89  | 2.96  | 4.23 | 7.71 | 5.47 | 6     | 4.93 | 4.25  | 8.52  | 5.88   |

|        |                 |       |       |      |      |      |       |      |       |       |        |
|--------|-----------------|-------|-------|------|------|------|-------|------|-------|-------|--------|
| 20964  | 'Syn1'          | 139.5 | 146.9 | 186  | 112  | 112  | 63.16 | 273  | 136.6 | 140.7 | 52.79  |
| 209645 | 'Bend7'         | 4.82  | 0     | 0    | 1.35 | 0.01 | 0     | 0    | 0.77  | 1.87  | 0.47   |
| 20965  | 'Syn2'          | 32.53 | 24.73 | 26.6 | 54.1 | 41.2 | 27.2  | 42.6 | 44.34 | 29.15 | 23.62  |
| 209683 | 'Ttc28'         | 0     | 0.61  | 0.55 | 0.68 | 1.3  | 0.44  | 2.37 | 0.13  | 1.25  | 0.23   |
| 20969  | 'Sdc1'          | 1.64  | 2.35  | 2.12 | 0    | 0    | 6.63  | 2    | 1.49  | 0     | 2.48   |
| 209692 | 'Dhtkd1'        | 0.85  | 1.71  | 3.63 | 2.19 | 5.26 | 5.14  | 1.93 | 3.03  | 3.11  | 1.59   |
| 20970  | 'Sdc3'          | 1.58  | 10.51 | 13.4 | 11.3 | 15.3 | 3.02  | 8.77 | 0.31  | 2.03  | 1.78   |
| 209707 | 'Lcorl'         | 3.54  | 7.87  | 5.36 | 4.72 | 4.55 | 1.44  | 1.58 | 2     | 2.23  | 2.34   |
| 20971  | 'Sdc4'          | 29.69 | 8.92  | 13.6 | 42   | 23.7 | 25.48 | 10.6 | 24.54 | 10.42 | 4.24   |
| 20972  | 'Syngr1'        | 69.3  | 40.48 | 83.8 | 38.1 | 60.2 | 76.84 | 44.1 | 57.16 | 97.9  | 65.13  |
| 20973  | 'Syngr2'        | 11.66 | 14.51 | 1.5  | 7.24 | 21   | 43.58 | 7.68 | 3.52  | 0.31  | 3.43   |
| 209737 | 'Kif15'         | 0.26  | 0.04  | 0.03 | 0    | 0.01 | 0     | 0.23 | 0.09  | 1.87  | 0      |
| 20974  | 'Syngr3'        | 471.4 | 387.5 | 387  | 342  | 381  | 613   | 591  | 517.1 | 455.1 | 555.9  |
| 209743 | 'AF529169'      | 3.11  | 0     | 0.01 | 0    | 5.7  | 1.59  | 0    | 0     | 0.22  | 0      |
| 20975  | 'Synj2'         | 1.89  | 1.71  | 0.93 | 0.79 | 3.58 | 2.88  | 5.71 | 2.25  | 15.83 | 4.72   |
| 209760 | 'Tmc7'          | 0     | 1.64  | 3.02 | 4.86 | 0.16 | 0.07  | 0.13 | 1.4   | 5.52  | 0      |
| 20977  | 'Syp'           | 393.8 | 330   | 467  | 289  | 353  | 202.1 | 375  | 365.2 | 388.7 | 381.41 |
| 209773 | 'Dennd2a'       | 1.79  | 0.39  | 0.05 | 1.42 | 0.12 | 0.01  | 1.76 | 0.35  | 0.08  | 0.47   |
| 209776 | 'Gpr139'        | 3.39  | 0     | 1.25 | 0    | 0    | 0     | 0    | 4.12  | 0     | 0      |
| 20979  | 'Syt1'          | 56.26 | 81.22 | 167  | 78.3 | 160  | 53.4  | 199  | 104.8 | 103.9 | 82.8   |
| 20980  | 'Syt2'          | 0     | 4.65  | 5.1  | 0    | 0.84 | 0.01  | 0    | 0.12  | 5.59  | 2.46   |
| 20981  | 'Syt3'          | 38.62 | 37.59 | 56.1 | 19.8 | 26.4 | 26.33 | 39.6 | 66.99 | 36.79 | 14.28  |
| 209815 | 'Tbc1d25'       | 5.73  | 11.6  | 15.3 | 9.08 | 15.6 | 1.76  | 1.55 | 6.86  | 4.55  | 8.5    |
| 20983  | 'Syt4'          | 173   | 114.1 | 100  | 106  | 91.3 | 87.6  | 92.8 | 96.63 | 119.8 | 116.63 |
| 209966 | 'Pgbd5'         | 3.9   | 9.27  | 1.88 | 9.16 | 3.06 | 0.42  | 8.76 | 1.91  | 0.02  | 4.25   |
| 210004 | 'B3gnt11'       | 7.73  | 1.86  | 2.37 | 0    | 5.22 | 0     | 0    | 4.9   | 7.79  | 11.01  |
| 210009 | 'Mtrr'          | 4.48  | 5.33  | 6.54 | 6.29 | 5.41 | 1.94  | 2.26 | 5.94  | 0     | 13.07  |
| 210027 | 'Slc35f3'       | 3.12  | 1.89  | 2.79 | 14   | 4.91 | 5.25  | 2.54 | 5.52  | 3.66  | 2.5    |
| 210029 | 'Metrl1'        | 0.02  | 3.49  | 1.55 | 4.27 | 1.51 | 5.13  | 0.02 | 0.97  | 2.23  | 0      |
| 210035 | 'Nemp1'         | 0     | 0     | 3.17 | 0    | 1.11 | 0     | 0.1  | 0     | 0     | 0      |
| 210044 | 'Adcy2'         | 10.98 | 3.75  | 0.02 | 1.81 | 11.3 | 13.04 | 0.23 | 9.29  | 17.77 | 2.84   |
| 210094 | 'Iglon5'        | 0     | 0.5   | 0    | 0    | 0    | 0     | 0    | 0.86  | 1.6   | 0.18   |
| 210104 | 'Zfp658'        | 5.65  | 0     | 0.08 | 6.6  | 3.1  | 0     | 1.08 | 5.67  | 1.21  | 2.33   |
| 210105 | 'Zfp719'        | 1.39  | 8.58  | 6.6  | 2.52 | 6.88 | 0.13  | 0    | 3.42  | 0.6   | 2.86   |
| 210106 | 'Tent4a'        | 2.6   | 3.6   | 1.24 | 1.82 | 0.55 | 0     | 2.01 | 2.69  | 0.01  | 0.22   |
| 210108 | 'D130043K22Rik' | 15.11 | 14.07 | 22.4 | 4.42 | 17.1 | 7.19  | 11.4 | 9.38  | 12.97 | 13.95  |
| 210126 | 'Lpp'           | 2.02  | 1.62  | 0.24 | 1.86 | 0.03 | 0.62  | 3.77 | 0.88  | 7.33  | 3.06   |
| 210135 | 'Zfp180'        | 11.51 | 16.88 | 6.67 | 9.97 | 3.4  | 1.65  | 4.22 | 16.3  | 6.14  | 10.11  |
| 210146 | 'Irgq'          | 5.38  | 2.8   | 3.7  | 19.3 | 2.47 | 0.79  | 5.75 | 3.23  | 4.64  | 2.85   |
| 210148 | 'Slc30a6'       | 24.46 | 13.29 | 10.3 | 21.6 | 12.8 | 7.4   | 13.1 | 10.16 | 5.47  | 9.38   |
| 210162 | 'Zkscan2'       | 1.54  | 0.13  | 3.39 | 0    | 0.65 | 0.32  | 0.91 | 0.95  | 4.59  | 1.56   |
| 210172 | 'Zfp526'        | 0.03  | 0     | 1.51 | 0    | 0.04 | 0.29  | 2.16 | 0.38  | 0     | 0.35   |
| 210274 | 'Shank2'        | 3.55  | 4.11  | 2.73 | 3.85 | 0.74 | 3.78  | 1.54 | 1.74  | 1.18  | 1.58   |
| 210293 | 'Dock10'        | 1.05  | 1.18  | 0.64 | 0.01 | 1.26 | 1.82  | 0.37 | 0     | 1.21  | 1.1    |
| 210297 | 'Lrch2'         | 2.15  | 2.32  | 0.18 | 1.42 | 1.32 | 1.59  | 1.64 | 0.78  | 2.25  | 1.95   |
| 210356 | 'Nckap5'        | 1.57  | 1.75  | 3.59 | 3.12 | 0.03 | 0.25  | 3.16 | 1.2   | 1.46  | 0.52   |
| 210376 | 'Mtmr9'         | 6.06  | 3.44  | 10   | 0.02 | 4.54 | 6.23  | 15.2 | 3.4   | 0.62  | 14.53  |
| 210417 | 'Thsd7b'        | 1.1   | 0.76  | 0.06 | 3.07 | 5.7  | 0.13  | 4.96 | 1.62  | 1.86  | 7.89   |
| 210503 | 'Zfp677'        | 0.39  | 1.44  | 0.03 | 0    | 0.74 | 3.06  | 9.97 | 1.5   | 0     | 5.29   |
| 210510 | 'Tdrd6'         | 0     | 0     | 0    | 0    | 0    | 0     | 0    | 0     | 0     | 0.08   |
| 210529 | 'Mettl14'       | 13.06 | 8.44  | 9.72 | 10.8 | 13.1 | 4.31  | 13.6 | 7.2   | 12.99 | 8.4    |
| 210530 | 'P3h2'          | 0.02  | 0.06  | 0    | 0    | 0    | 0     | 0    | 0     | 0     | 0      |
| 210544 | 'Tbc1d31'       | 1.3   | 3.21  | 4.72 | 1.41 | 1.01 | 1.49  | 0.43 | 1.85  | 5.27  | 0.91   |
| 210573 | 'Tmem151b'      | 13.39 | 15.16 | 19.2 | 8.1  | 15.6 | 19.07 | 14.1 | 12.52 | 4.47  | 9.14   |
| 210582 | 'Coq10a'        | 5.52  | 21.97 | 8.83 | 16.1 | 23.8 | 21.4  | 9.27 | 21.44 | 8.28  | 18.37  |
| 210583 | 'Gm4767'        | 0     | 2.19  | 2.17 | 0    | 4.73 | 13.37 | 0    | 4.02  | 0.02  | 8.47   |
| 210622 | 'Pamr1'         | 0.46  | 0     | 9.19 | 0    | 4.02 | 0     | 0    | 0.63  | 0.21  | 0      |
| 210673 | 'Prnt3'         | 9.17  | 3.58  | 20.3 | 2.65 | 9.15 | 5.67  | 26.5 | 7.62  | 16.11 | 3.59   |

|        |                 |       |       |      |      |      |       |      |       |       |        |
|--------|-----------------|-------|-------|------|------|------|-------|------|-------|-------|--------|
| 210710 | 'Gab3'          | 3.6   | 1.74  | 7.43 | 0    | 2.38 | 3.79  | 3.9  | 0.81  | 1.63  | 0.38   |
| 210711 | 'Mcmbp'         | 11.07 | 11.39 | 9.35 | 13   | 18.2 | 17.71 | 9.94 | 8.27  | 14.35 | 11.33  |
| 210719 | 'Mkx'           | 3.1   | 2.84  | 1.43 | 0    | 0.29 | 0.49  | 0    | 1.72  | 0     | 0      |
| 210741 | 'Kcnk12'        | 0.14  | 0.89  | 0.47 | 0    | 0.63 | 0     | 2.26 | 0     | 0     | 0      |
| 210762 | 'Ppp1r36'       | 3.36  | 0     | 0    | 0    | 0    | 0     | 0    | 2.1   | 0     | 0      |
| 210766 | 'Brcc3'         | 84.41 | 77.07 | 59.1 | 72.8 | 51.3 | 101   | 43.3 | 87.8  | 67.11 | 102.87 |
| 210789 | 'Tbc1d4'        | 0.02  | 7.76  | 4.68 | 5.59 | 3.14 | 2.41  | 6.58 | 0.98  | 0.04  | 0.5    |
| 210801 | 'Unc5d'         | 7.29  | 3.46  | 3.6  | 3.58 | 2.69 | 1.77  | 5.62 | 2.91  | 1.15  | 3.22   |
| 210808 | 'Lacc1'         | 0     | 0     | 0    | 2.32 | 0    | 0.08  | 0    | 0     | 0     | 0      |
| 210853 | 'Zfp947'        | 3.47  | 1.22  | 2.15 | 2.87 | 1.32 | 2.63  | 2.08 | 5.47  | 1.16  | 1.54   |
| 210925 | 'Ints9'         | 7.77  | 7.58  | 6.53 | 8.58 | 4.59 | 2.66  | 12.8 | 5.41  | 13.22 | 23.88  |
| 210933 | 'Adgrb3'        | 26.38 | 16.33 | 14.4 | 10.4 | 12.3 | 7.04  | 20.7 | 13.11 | 11.17 | 13.04  |
| 210973 | 'Kbtbd2'        | 22.28 | 10.06 | 13.9 | 17   | 18.6 | 4.35  | 20.9 | 12.56 | 12.15 | 15.42  |
| 210982 | 'Bicral'        | 1.5   | 2.6   | 2.94 | 0.82 | 1.4  | 0.46  | 6.63 | 4.77  | 7.56  | 3.67   |
| 210992 | 'Lpcat1'        | 15.97 | 7.35  | 13.7 | 16.1 | 9.75 | 13.58 | 12.6 | 17.12 | 25.47 | 6.27   |
| 210998 | 'Fam91a1'       | 2.54  | 1.3   | 3.74 | 3.55 | 3.61 | 3.55  | 2.72 | 3.67  | 5.22  | 4.7    |
| 211006 | 'Sepsecs'       | 4.38  | 4.79  | 1.98 | 0.43 | 2.65 | 8.46  | 3.79 | 1.86  | 2.78  | 1.87   |
| 211007 | 'Trim41'        | 0.33  | 3.26  | 1.47 | 1.63 | 9.04 | 0.29  | 2.91 | 0.77  | 8.66  | 5.32   |
| 211064 | 'Alkbh1'        | 8.77  | 13.17 | 24.7 | 15.6 | 6.7  | 5.19  | 17.9 | 7.71  | 8.56  | 19.86  |
| 211134 | 'Lzts1'         | 18.86 | 15.08 | 4.23 | 7.63 | 27.9 | 9.32  | 5.12 | 30.91 | 10.6  | 10.12  |
| 211135 | 'D130040H23Rik' | 2.96  | 1.75  | 2.01 | 0.1  | 0.59 | 4.03  | 5.1  | 1.46  | 0.45  | 1.85   |
| 211147 | 'March11'       | 2.31  | 2.17  | 0    | 6.11 | 0    | 0     | 0    | 1.38  | 0     | 0.9    |
| 211151 | 'Churc1'        | 340.2 | 161.6 | 306  | 297  | 206  | 291   | 298  | 231.5 | 230.2 | 228.89 |
| 211187 | 'Lrtm2'         | 14.21 | 11.04 | 20.3 | 0    | 15.6 | 6.02  | 17.3 | 14.96 | 8.35  | 14.56  |
| 211223 | 'Vmn2r15'       | 0     | 0     | 0    | 0    | 0    | 0     | 0    | 0.09  | 0     | 0      |
| 211228 | 'Lrrc25'        | 0     | 0     | 0    | 0    | 0    | 0.55  | 0    | 3.61  | 0     | 0      |
| 211232 | 'Cpne9'         | 17.15 | 0.91  | 14.2 | 6.05 | 0.02 | 7.78  | 0    | 1.77  | 1.91  | 0.05   |
| 211253 | 'Mtrf1'         | 5.57  | 9.53  | 13.7 | 6.28 | 5.32 | 17.84 | 4.47 | 17.97 | 13.57 | 5.31   |
| 211255 | 'Kbtbd7'        | 7.83  | 3.34  | 1.09 | 14.2 | 2.72 | 1.8   | 6.56 | 6.07  | 5.39  | 1.78   |
| 211286 | 'Cln5'          | 7.95  | 4.65  | 5.09 | 22.8 | 8.96 | 0.63  | 1.12 | 3.08  | 10.01 | 0.81   |
| 211323 | 'Nrg1'          | 0.86  | 4.35  | 1.45 | 5.71 | 4.76 | 0     | 4.12 | 2.88  | 3.59  | 8.5    |
| 211329 | 'Ncoa7'         | 5.78  | 10.01 | 10.1 | 5.36 | 11.4 | 6.79  | 9.21 | 8.93  | 12.33 | 21.61  |
| 211347 | 'Pank3'         | 1.17  | 0.21  | 3    | 0.33 | 2.33 | 0.91  | 0.28 | 1.1   | 1.58  | 0.16   |
| 211378 | '6720489N17Rik' | 1.75  | 1.18  | 3.06 | 0.65 | 1.96 | 0.97  | 0.02 | 0.16  | 0.35  | 1.31   |
| 211383 | 'Amer3'         | 6.62  | 3.19  | 4.18 | 0    | 3.49 | 6.51  | 2.25 | 7.36  | 14.1  | 3.59   |
| 211389 | 'Suox'          | 13.64 | 4     | 3.96 | 0    | 7.21 | 4.05  | 0.02 | 7.33  | 7.6   | 3.16   |
| 211401 | 'Mtss1'         | 9.36  | 11.77 | 8.72 | 18.9 | 3.76 | 8.51  | 4.28 | 8.37  | 7.19  | 8.27   |
| 211429 | 'Pla2g4b'       | 0.05  | 1.85  | 1.66 | 0.47 | 2.46 | 1.88  | 0.1  | 0.35  | 0.4   | 2.29   |
| 211446 | 'Exoc3'         | 33.34 | 22.8  | 36.6 | 36.8 | 24.7 | 23.95 | 28.5 | 19.97 | 43.37 | 31.98  |
| 211468 | 'Kcnh8'         | 3.25  | 0.78  | 0.59 | 0.01 | 0.66 | 1.69  | 0    | 1.96  | 1.44  | 1.6    |
| 211480 | 'Kcnj14'        | 5.44  | 7.31  | 3.95 | 1.54 | 3.88 | 0     | 5.81 | 4.87  | 1.4   | 15.45  |
| 211482 | 'Efhb'          | 3.91  | 2.24  | 0    | 4.55 | 4.06 | 0     | 3.78 | 0     | 2.53  | 2.46   |
| 211484 | 'Tsga10'        | 0.59  | 2.3   | 3.05 | 0.92 | 2.64 | 1.2   | 4.34 | 0.51  | 3.09  | 5.2    |
| 211488 | 'Ado'           | 14.57 | 11.43 | 9    | 8.59 | 11.9 | 4.31  | 4.67 | 4.3   | 4.1   | 1.74   |
| 211499 | 'Tmem87a'       | 6.29  | 1.88  | 2.34 | 5.86 | 7.13 | 9.59  | 4.51 | 4.96  | 12.56 | 2.17   |
| 211535 | 'Ccdc114'       | 0     | 0.17  | 0    | 0    | 0.02 | 0     | 2.03 | 0     | 0     | 0.29   |
| 211548 | 'Nomo1'         | 15.84 | 17.02 | 19   | 5.56 | 5.99 | 6.93  | 23.7 | 13.76 | 14.43 | 21.25  |
| 211550 | 'Tifa'          | 0     | 0     | 0.02 | 4.1  | 2.81 | 0.06  | 0    | 0.11  | 0     | 0      |
| 211556 | 'Ap1ar'         | 1.77  | 4.1   | 5.79 | 12.4 | 8.6  | 0.77  | 4.41 | 2.05  | 2.82  | 2.55   |
| 211577 | 'Mrgprf'        | 0     | 0     | 0    | 0    | 0.23 | 0     | 0    | 0     | 0     | 0      |
| 211586 | 'Tfdp2'         | 4.42  | 0.99  | 2.69 | 2.58 | 2.63 | 2.17  | 3.97 | 0.42  | 0.7   | 2.86   |
| 211612 | 'Ptchd1'        | 10.25 | 3.68  | 11.6 | 7.31 | 17.2 | 18.03 | 5.05 | 14.23 | 3.82  | 10.43  |
| 211623 | 'Plac9a'        | 5.03  | 0     | 19.8 | 0    | 0    | 0     | 0    | 8.1   | 0     | 0      |
| 211651 | 'Fancd2'        | 0     | 0.26  | 4.73 | 0    | 0.01 | 0.51  | 0    | 0.86  | 0     | 0      |
| 211652 | 'Wwc1'          | 1.94  | 1.66  | 0.36 | 4.55 | 2.03 | 0     | 0.01 | 1.12  | 0.14  | 1.1    |
| 211660 | 'Cspp1'         | 11.22 | 6.63  | 5.54 | 5.02 | 6.09 | 18    | 9.22 | 3.5   | 6.22  | 11.04  |
| 211666 | 'Mgst2'         | 0     | 0.85  | 2.36 | 0    | 0    | 0     | 0    | 0     | 0     | 0      |
| 211673 | 'Arfgef1'       | 3.96  | 1.83  | 1.8  | 2.58 | 5.63 | 0.73  | 4.78 | 1.35  | 0.06  | 3.76   |

|        |                 |       |       |      |      |      |       |      |       |       |        |
|--------|-----------------|-------|-------|------|------|------|-------|------|-------|-------|--------|
| 211712 | 'Pcdh9'         | 96.97 | 87.64 | 50.2 | 16.6 | 42.1 | 68.53 | 88.4 | 48.15 | 90    | 84.87  |
| 211739 | 'Vstm2a'        | 100.3 | 67.71 | 32.1 | 18.3 | 53.7 | 33.8  | 101  | 68.1  | 70.53 | 65.01  |
| 211770 | 'Trib1'         | 0     | 0.49  | 4.64 | 14.1 | 0.02 | 4.57  | 10.8 | 0.45  | 0.1   | 0.59   |
| 211798 | 'Mfsd9'         | 0     | 1.76  | 5.03 | 0    | 0.91 | 2.22  | 1.74 | 1.71  | 1.73  | 0      |
| 211896 | 'Depdc7'        | 0     | 2.72  | 0.48 | 0    | 0.03 | 0     | 0    | 0     | 4.61  | 0      |
| 211914 | 'Asap2'         | 1.42  | 0.76  | 1.51 | 1.68 | 1.49 | 1.86  | 0.5  | 0.27  | 2.86  | 2.84   |
| 211922 | 'Dennd6a'       | 2.05  | 5.93  | 1.4  | 4.3  | 2.33 | 1.24  | 1.14 | 1.57  | 12.49 | 3.31   |
| 211936 | 'Ccdc73'        | 0.27  | 1.58  | 1.27 | 0    | 1.7  | 0.51  | 1.53 | 0.32  | 1.18  | 2.43   |
| 211945 | 'Plekhh1'       | 0.49  | 0.02  | 1.04 | 0.68 | 0.52 | 1.48  | 1.01 | 0     | 0.1   | 0      |
| 211948 | 'Pde12'         | 16.3  | 15.18 | 11.9 | 27.3 | 5.97 | 8.72  | 9.3  | 4.2   | 13.72 | 3.83   |
| 211949 | 'Spsb4'         | 2.91  | 4.3   | 5.14 | 0    | 0.26 | 4.65  | 1.99 | 3.87  | 2.42  | 2.27   |
| 211961 | 'Asxl3'         | 1.2   | 0.15  | 0.47 | 0.02 | 0.19 | 0.02  | 0    | 0.56  | 0     | 0      |
| 211978 | 'Zfyve26'       | 1.8   | 0     | 0.9  | 1.64 | 0    | 1.12  | 1.03 | 0.85  | 3.04  | 1.97   |
| 211986 | 'Tmem18'        | 18.59 | 11.15 | 13.9 | 5.8  | 3.1  | 14.41 | 18.7 | 16.02 | 37.17 | 7.77   |
| 212032 | 'Hk3'           | 1.21  | 0.26  | 0.05 | 0.02 | 2.48 | 0.06  | 0    | 1.31  | 0     | 3.26   |
| 212090 | 'Tmem60'        | 81.52 | 57.73 | 65.1 | 43.5 | 92.4 | 136.6 | 65.3 | 60.93 | 113   | 112.38 |
| 212111 | 'Inpp5a'        | 4.84  | 0.11  | 3.1  | 11.3 | 2.89 | 4.64  | 4.86 | 2.07  | 2.68  | 0.41   |
| 212114 | 'Nhlrc3'        | 0.09  | 0.47  | 0    | 0    | 0.89 | 0     | 0    | 0     | 2.67  | 2.29   |
| 212123 | 'Dcaf15'        | 8.4   | 4.59  | 2.57 | 12.7 | 4.74 | 10.12 | 6.46 | 0.41  | 3.61  | 2.68   |
| 212124 | 'Cfap46'        | 1.04  | 3.52  | 4.43 | 1.95 | 2.68 | 6.06  | 4.57 | 2.86  | 1.18  | 4.39   |
| 212127 | 'Proser1'       | 0.99  | 0.37  | 2.41 | 1.97 | 3.48 | 0.01  | 2.61 | 0.5   | 0.64  | 1.02   |
| 212139 | 'Cc2d1a'        | 18.83 | 14.98 | 23.4 | 1.51 | 10.4 | 14.06 | 11.9 | 15.84 | 23.99 | 19.26  |
| 212153 | 'Ccdc191'       | 1.76  | 2.06  | 1.25 | 4.66 | 2.18 | 0     | 3.03 | 0.28  | 3.79  | 2.57   |
| 212163 | '8030462N17Rik' | 10.68 | 7.46  | 11.7 | 8.15 | 9.44 | 6.07  | 8.37 | 6.37  | 13.06 | 9.6    |
| 212167 | 'Gsap'          | 2.95  | 0.07  | 8.01 | 12   | 3.72 | 0.95  | 2.86 | 1.7   | 3.77  | 2.65   |
| 212168 | 'Zswim4'        | 3.12  | 1.7   | 2.61 | 2.64 | 0.33 | 0.72  | 0    | 1.41  | 0     | 2.68   |
| 212190 | 'Ubxn10'        | 3.9   | 3.1   | 2.89 | 0    | 8.67 | 0     | 0    | 3.32  | 3.08  | 4.94   |
| 212198 | 'Wdr25'         | 2.52  | 2.78  | 5.03 | 0    | 0.01 | 3.99  | 0.25 | 12.46 | 3.78  | 0.08   |
| 212276 | 'Zfp748'        | 2.49  | 1.95  | 1.2  | 0.36 | 1.95 | 0.02  | 2.68 | 3.82  | 6.05  | 2.73   |
| 212281 | 'Zfp729a'       | 0.06  | 0.14  | 0.06 | 3.64 | 0.12 | 2.14  | 0.01 | 0     | 1.1   | 0.04   |
| 212285 | 'Arap2'         | 1.07  | 0.77  | 0.03 | 0    | 1.6  | 2.78  | 1.83 | 0     | 0.92  | 0.01   |
| 212307 | 'Mapre2'        | 81.51 | 91.45 | 79.7 | 74.3 | 67.3 | 47.3  | 67.6 | 77.86 | 92.1  | 105.38 |
| 212326 | 'Fam149a'       | 9.75  | 6.54  | 6.1  | 21.7 | 6.83 | 6.44  | 4.44 | 9.53  | 3.94  | 7.06   |
| 212377 | 'Mms22l'        | 0     | 0     | 0    | 0.25 | 1.09 | 0     | 0.98 | 0.03  | 0     | 0      |
| 212390 | 'Klhl32'        | 9.85  | 11.57 | 22.3 | 0.12 | 24.1 | 17.16 | 1.76 | 25.01 | 13.67 | 17.57  |
| 212391 | 'Lcor'          | 1.85  | 2.07  | 5.59 | 7.2  | 2.81 | 3.85  | 1.89 | 1.62  | 0.34  | 2.54   |
| 212392 | 'Ccdc110'       | 0     | 0     | 0    | 0    | 0    | 0     | 0    | 0     | 0     | 0.43   |
| 212398 | 'Frat2'         | 0.02  | 0     | 1.13 | 1.76 | 0    | 0     | 1.78 | 3.56  | 3.59  | 0      |
| 212439 | 'AA986860'      | 1.16  | 0     | 0.07 | 1.22 | 0.12 | 0.79  | 0    | 0     | 0.02  | 0      |
| 212442 | 'Lactb2'        | 0.02  | 0.87  | 3.22 | 3.61 | 8.05 | 2.53  | 4.16 | 5.42  | 4.24  | 6.53   |
| 212448 | '9330159F19Rik' | 13.2  | 14.53 | 10.9 | 14.2 | 7.2  | 10.3  | 14.9 | 9.69  | 6.87  | 10.85  |
| 212483 | 'Fam193b'       | 1.14  | 3.65  | 4.64 | 19.1 | 14.5 | 13.04 | 8.56 | 7.31  | 4.67  | 2.99   |
| 212503 | 'Paox'          | 1.79  | 4.85  | 2.52 | 12.7 | 6.72 | 0.04  | 11.4 | 0     | 0.02  | 0      |
| 212508 | 'Mtg1'          | 18.35 | 47.99 | 45.8 | 9.3  | 49   | 44.67 | 52.9 | 31.33 | 29.49 | 45.31  |
| 212514 | 'Spice1'        | 7.25  | 6.88  | 5.71 | 0    | 5.6  | 1.94  | 4.94 | 2.1   | 2.8   | 12.94  |
| 212516 | 'Efcab12'       | 4.02  | 1.37  | 4.49 | 0.48 | 9.21 | 9.85  | 13.5 | 2.12  | 2.58  | 14.28  |
| 212517 | 'Cfap44'        | 2.76  | 2.86  | 1.22 | 2.5  | 3.68 | 1.23  | 0.01 | 0.22  | 1.2   | 5.19   |
| 212518 | 'Sprn'          | 10.76 | 12.83 | 19.4 | 7.46 | 18.9 | 5.99  | 12.4 | 9.53  | 7.5   | 8.51   |
| 212528 | 'Trmt1'         | 33    | 43.38 | 29.9 | 20.1 | 46.4 | 74.77 | 25.5 | 18.95 | 20.39 | 34.75  |
| 212531 | 'Sh3bgrl2'      | 4.79  | 1.73  | 1.28 | 0    | 0.03 | 0.17  | 3.22 | 1.05  | 4.54  | 2.42   |
| 212539 | 'Gm266'         | 2.27  | 0     | 1.99 | 0    | 0    | 0     | 6.11 | 0     | 0     | 0      |
| 212541 | 'Rho'           | 0     | 1.37  | 0    | 0    | 0    | 0     | 0    | 0     | 0     | 0      |
| 212547 | 'Nepro'         | 0.72  | 0.02  | 0.58 | 0    | 1.64 | 0.34  | 1.66 | 0.72  | 0.44  | 0.52   |
| 212555 | 'Pqlc2'         | 8.27  | 6.2   | 8.57 | 2.88 | 16   | 0     | 8.2  | 4.98  | 15.13 | 1.62   |
| 212569 | 'Zfp273'        | 4.77  | 0     | 0    | 6.8  | 2.03 | 1.49  | 0    | 2.36  | 0     | 5.3    |
| 212627 | 'Prpsap2'       | 32.69 | 33.43 | 49.7 | 7.14 | 25.4 | 38.92 | 14.6 | 39    | 35.44 | 52.92  |
| 212632 | 'Iffo2'         | 0.19  | 1.88  | 0.3  | 16.4 | 0.63 | 0.01  | 0.38 | 1.4   | 0.02  | 0.16   |
| 212647 | 'Aldh4a1'       | 19.54 | 13.12 | 12.4 | 26.3 | 15.2 | 3.57  | 15.1 | 13.88 | 12.17 | 16.83  |



|        |            |       |       |      |      |      |       |      |       |       |       |
|--------|------------|-------|-------|------|------|------|-------|------|-------|-------|-------|
| 212670 | 'Catsper2' | 4     | 0.71  | 0    | 0    | 1.41 | 0.1   | 0.01 | 0     | 2.04  | 1.35  |
| 212679 | 'Mars2'    | 3.72  | 0     | 1.69 | 0    | 0.05 | 6.48  | 1.46 | 3.69  | 6.5   | 0     |
| 212706 | 'N4bp3'    | 14.56 | 2.36  | 16   | 0    | 0    | 4.95  | 0    | 0.39  | 5.48  | 1.66  |
| 212712 | 'Satb2'    | 0     | 0     | 0.01 | 0    | 0    | 0     | 0    | 0     | 0     | 0     |
| 212728 | 'Tarbp1'   | 0.18  | 0.33  | 0.07 | 0.01 | 2.01 | 0.38  | 0.19 | 0.02  | 0.64  | 1.2   |
| 212733 | 'Bicdl2'   | 0     | 0     | 0    | 0    | 0    | 0.07  | 0    | 0     | 0     | 0     |
| 212772 | 'Arl14ep'  | 8.68  | 12.81 | 11.9 | 16.4 | 7.93 | 8.36  | 4.3  | 12.39 | 11.19 | 12.89 |
| 212862 | 'Chpt1'    | 5.38  | 2.55  | 4.51 | 5.82 | 3.58 | 5.39  | 0.48 | 2.16  | 2.97  | 3.56  |
| 212880 | 'Ddx46'    | 14.85 | 11.16 | 12.7 | 17.3 | 5.25 | 16.29 | 8.83 | 7.54  | 13.54 | 5.37  |
| 212892 | 'Rsph4a'   | 7.82  | 6.13  | 10.8 | 32.6 | 10.4 | 1.59  | 1.98 | 0.87  | 1.68  | 15.11 |
| 212898 | 'Dse'      | 2.91  | 0.05  | 1.2  | 0    | 0    | 0     | 0    | 0.11  | 0     | 0.17  |
| 212919 | 'Kctd7'    | 7.24  | 7.1   | 9.77 | 8.5  | 4.24 | 3.76  | 3.27 | 3.88  | 1.13  | 6.8   |
| 212933 | 'Pm20d1'   | 0     | 0     | 1.63 | 1.59 | 0    | 0.02  | 0    | 0     | 1.99  | 0     |
| 212937 | 'Tifab'    | 0     | 1.64  | 0    | 0    | 0    | 6.17  | 0    | 2.21  | 0     | 0     |
| 212943 | 'Tent5a'   | 0.42  | 9.58  | 1.24 | 14.9 | 0.01 | 1.7   | 1.66 | 2.66  | 11.71 | 4.38  |
| 212974 | 'Pggghg'   | 0     | 0     | 3.03 | 0    | 0.02 | 0     | 0    | 0     | 0.04  | 4.05  |
| 212980 | 'Slc45a3'  | 0     | 0     | 0    | 9.09 | 0    | 0     | 0    | 0     | 0     | 0     |
| 212986 | 'Scfd2'    | 10.71 | 4.72  | 0.77 | 14.7 | 6.22 | 10.35 | 7.64 | 9.8   | 3.92  | 2.61  |
| 212989 | 'Best2'    | 0     | 0     | 0    | 0    | 0    | 0     | 0    | 0.02  | 0     | 2.76  |
| 212996 | 'Wbscr17'  | 1.63  | 2.18  | 1.09 | 1    | 3.62 | 2.46  | 3.76 | 3.35  | 1.72  | 3.33  |
| 212999 | 'Tnpo2'    | 2.23  | 2.63  | 4.87 | 4.22 | 8.88 | 4.14  | 2.65 | 3.46  | 9.83  | 3.52  |
| 213002 | 'Ifitm6'   | 0     | 5.66  | 0    | 0    | 1.3  | 0     | 0    | 0     | 0     | 0     |
| 213006 | 'Mfsd4a'   | 19.96 | 13.91 | 27.7 | 28.4 | 31.5 | 16.24 | 20.7 | 15.79 | 20.04 | 23.76 |
| 213011 | 'Zfp583'   | 6.66  | 2.61  | 0.31 | 0.24 | 0.11 | 4.86  | 2.3  | 0.13  | 4.61  | 3.11  |
| 213012 | 'Abhd10'   | 46.1  | 65.2  | 57.5 | 52.9 | 58   | 47.04 | 91.4 | 54.89 | 67.9  | 73.92 |
| 213019 | 'Pdlim2'   | 0     | 11.06 | 0    | 0    | 43.5 | 35.02 | 0.04 | 3.42  | 0     | 3.64  |
| 213027 | 'Evi5l'    | 20.38 | 18.89 | 18.2 | 23.8 | 23.3 | 15.33 | 22.7 | 20.6  | 16.61 | 11.38 |
| 213053 | 'Slc39a14' | 1.48  | 0.71  | 1.22 | 1.83 | 1.18 | 0.89  | 0.01 | 0.44  | 0     | 1.58  |
| 213054 | 'Gabpb2'   | 1.12  | 0.28  | 0.17 | 0.35 | 2.14 | 1.03  | 0.21 | 0.09  | 1.34  | 0.76  |
| 213056 | 'Fam126b'  | 10.39 | 4.09  | 12   | 10.1 | 8.47 | 2.33  | 14   | 7.13  | 12.95 | 7     |
| 213068 | 'Tmem71'   | 0     | 0     | 0    | 4.95 | 0    | 0     | 0    | 0.03  | 0     | 0     |
| 213081 | 'Wdr19'    | 6.89  | 1.83  | 1.47 | 3.94 | 7.3  | 2.03  | 10.7 | 0.93  | 1.04  | 2.57  |
| 213084 | 'Cdkl3'    | 1.41  | 14.79 | 7.35 | 20.8 | 16.1 | 13.3  | 1.93 | 13.7  | 9.99  | 4.66  |
| 213109 | 'Phf3'     | 2.24  | 2.36  | 3.53 | 3.46 | 1.43 | 2.81  | 4.79 | 2.28  | 1.13  | 2.41  |
| 213119 | 'Itga10'   | 0     | 0     | 0.12 | 0.1  | 0.05 | 0     | 0    | 0.16  | 0     | 0.7   |
| 213121 | 'Ankrd35'  | 12.37 | 10.93 | 16.8 | 12.1 | 2.07 | 9.74  | 10   | 11.54 | 12.43 | 16.32 |
| 213171 | 'Prss27'   | 0.04  | 0     | 1.42 | 0    | 0    | 0     | 0    | 0.22  | 0     | 0     |
| 213208 | 'Il2orb'   | 1.84  | 0     | 1.91 | 0    | 0    | 0     | 0    | 0.02  | 0.24  | 0     |
| 213211 | 'Rnf26'    | 0.89  | 0.02  | 0.63 | 0    | 3.44 | 6.21  | 5.67 | 13.75 | 0     | 0.02  |
| 213233 | 'Tapbp1'   | 12.05 | 22.39 | 12.9 | 37.1 | 16.6 | 7.75  | 8.33 | 23.49 | 27.96 | 16.79 |
| 213234 | 'Zbbx'     | 1.31  | 2.74  | 0    | 0.1  | 0.7  | 3.65  | 1.94 | 1.2   | 1.97  | 8.35  |
| 213236 | 'Dnd1'     | 0     | 0.36  | 0.07 | 0    | 0    | 0     | 0.03 | 0.5   | 0     | 0     |
| 213262 | 'Fstl5'    | 103.1 | 55.51 | 17.4 | 47.8 | 6.59 | 3.96  | 55.2 | 34.63 | 19.48 | 33.52 |
| 213272 | 'Txnrc2'   | 0     | 0     | 0    | 0    | 0    | 0.13  | 0    | 0.23  | 0     | 0     |
| 21331  | 'T2'       | 4.02  | 1.96  | 0    | 0    | 2.88 | 0.05  | 0.09 | 0     | 0     | 0     |
| 213311 | 'Fbxl21'   | 11.93 | 4.22  | 6.93 | 4.19 | 7.15 | 3.12  | 11.6 | 10.23 | 21.68 | 12.95 |
| 213326 | 'Scyl2'    | 5.83  | 8.03  | 3.42 | 10   | 4.3  | 6.19  | 6.72 | 5.99  | 20.2  | 7.01  |
| 21333  | 'Tac1'     | 0.04  | 2.45  | 47.4 | 5.76 | 18.5 | 6.66  | 8.65 | 24.39 | 0     | 1.91  |
| 21334  | 'Tac2'     | 0     | 0     | 4.76 | 0    | 0    | 0     | 0    | 35.45 | 5.85  | 0     |
| 21335  | 'Tacc3'    | 6.99  | 0.37  | 3.77 | 9.24 | 3.33 | 0     | 0    | 2.84  | 6.19  | 0     |
| 213350 | 'Gatd1'    | 29.34 | 31.3  | 35.4 | 10.7 | 36.5 | 29.09 | 70.6 | 41.98 | 34.87 | 41.74 |
| 21336  | 'Tacr1'    | 0.6   | 9.53  | 3.37 | 6.04 | 3.21 | 1.11  | 3.46 | 13.83 | 15.45 | 7.43  |
| 21337  | 'Tacr2'    | 0     | 0     | 0    | 0    | 0    | 0     | 0    | 0     | 2.82  | 0     |
| 21338  | 'Tacr3'    | 0     | 0     | 2.49 | 3.8  | 0    | 0     | 0    | 0     | 0     | 5.39  |
| 213389 | 'Prdm9'    | 1.88  | 0.22  | 0.11 | 1.3  | 3.22 | 0.06  | 0.09 | 0.05  | 0.06  | 0.69  |
| 21339  | 'Taf1a'    | 13.15 | 9.16  | 5.7  | 6.78 | 9.62 | 0.15  | 2.47 | 10.04 | 8.05  | 10.78 |
| 213391 | 'Rassf4'   | 0.52  | 0.29  | 0.59 | 0    | 2.75 | 1.05  | 0.62 | 0.49  | 0.31  | 0.98  |
| 213393 | 'Depp1'    | 0.03  | 0.04  | 0.04 | 0.04 | 0    | 0     | 0    | 0     | 0     | 0     |

|        |                 |       |       |      |      |      |       |      |       |       |        |
|--------|-----------------|-------|-------|------|------|------|-------|------|-------|-------|--------|
| 21340  | 'Taf1b'         | 20.06 | 14.06 | 27.6 | 22.1 | 15.4 | 7.61  | 19   | 23.08 | 16.65 | 19.84  |
| 213402 | 'Armc2'         | 1.29  | 0.06  | 0.61 | 1.63 | 0.03 | 0.36  | 3.12 | 2.13  | 0.45  | 2.4    |
| 213409 | 'Lemd1'         | 0.52  | 0     | 0    | 0.3  | 2.23 | 15.08 | 6.08 | 2.99  | 25.89 | 11.09  |
| 21341  | 'Taf1c'         | 3.03  | 1.05  | 3.83 | 0    | 6.58 | 1.46  | 2.07 | 6.17  | 0     | 2.53   |
| 213417 | 'Klhdc8a'       | 5.26  | 1.67  | 4.04 | 0.02 | 7.01 | 0     | 5.16 | 5.29  | 0.7   | 9.82   |
| 21343  | 'Taf6'          | 18.39 | 30.27 | 31.7 | 50.1 | 25.1 | 36.57 | 13.1 | 42.6  | 31.9  | 47.59  |
| 213435 | 'Mylk3'         | 0.03  | 0     | 0.13 | 0.06 | 0.02 | 0.04  | 0.08 | 0.02  | 0     | 0.01   |
| 213438 | 'P2ry10b'       | 0.01  | 0     | 0    | 0    | 0    | 0     | 0    | 1.21  | 0     | 0      |
| 21345  | 'Tagln'         | 0     | 0.03  | 0    | 0.04 | 0    | 0     | 0.26 | 0     | 0     | 0.04   |
| 213452 | 'Dstyk'         | 4.51  | 2.96  | 4.1  | 1.49 | 4.04 | 2.49  | 6.84 | 5.71  | 7.79  | 4.32   |
| 21346  | 'Tagln2'        | 6.95  | 7.6   | 16.5 | 0    | 1.52 | 11.18 | 18.3 | 2.92  | 36.36 | 35.61  |
| 213464 | 'Rbbp5'         | 13.69 | 8.6   | 28.6 | 21.8 | 6.78 | 7.88  | 17.3 | 22.28 | 18.98 | 17.28  |
| 213469 | 'Lgi3'          | 30.09 | 17.08 | 47.4 | 10.2 | 24.2 | 17.7  | 27.1 | 16.98 | 13.33 | 15.51  |
| 213484 | 'Nudt18'        | 34.6  | 26.72 | 37.3 | 13.2 | 28.8 | 60.31 | 51.2 | 29.8  | 32.38 | 2.63   |
| 213491 | 'Szrd1'         | 3.13  | 7.91  | 10.3 | 3.89 | 5.11 | 4.2   | 4.69 | 6.46  | 2.8   | 1.25   |
| 213498 | 'Arhgef11'      | 1.75  | 0.81  | 2.9  | 2.08 | 2.06 | 0     | 2.35 | 2.05  | 1.9   | 3.86   |
| 213499 | 'Fbxo42'        | 9.9   | 7.24  | 22   | 9.05 | 1.61 | 1.47  | 12   | 10.29 | 13.65 | 13.38  |
| 21350  | 'Tal2'          | 0     | 0     | 0    | 5.08 | 0    | 0     | 0    | 0     | 0     | 0      |
| 21351  | 'Taldo1'        | 94.48 | 97.29 | 96.1 | 107  | 143  | 162.3 | 89.6 | 100.8 | 92.57 | 75.98  |
| 213522 | 'Plekhg6'       | 0     | 0     | 0    | 0    | 0.11 | 0     | 0    | 0     | 0     | 0      |
| 213527 | 'Pth2r'         | 0     | 1.5   | 3.22 |      | 8.12 | 0     | 0    | 0     | 0     | 0      |
| 21353  | 'Tank'          | 24.66 | 18.8  | 12.2 | 32.6 | 11.7 | 14.18 | 9.77 | 10.25 | 17.26 | 19.05  |
| 213539 | 'Bag2'          | 24.45 | 10.19 | 15.7 | 18.5 | 7.85 | 0.38  | 9.76 | 37.8  | 7.91  | 24.97  |
| 21354  | 'Tap1'          | 0     | 3.34  | 0    | 6.72 | 0.1  | 0     | 4.46 | 3.58  | 1.35  | 1.56   |
| 213541 | 'Ythdf2'        | 26.3  | 22.29 | 24.9 | 36.9 | 11.7 | 13.72 | 13.6 | 28.22 | 24.15 | 32.24  |
| 21355  | 'Tap2'          | 3.38  | 7.66  | 9.44 | 15.5 | 1.81 | 10.92 | 2.6  | 2.83  | 21.81 | 6.62   |
| 213550 | 'Dis3l'         | 2.19  | 5.67  | 10.7 | 9.51 | 6.58 | 5.37  | 5.64 | 2.83  | 7.3   | 6.56   |
| 213556 | 'Plekhh2'       | 0.46  | 0.01  | 0.79 | 0.03 | 0.03 | 0     | 1.13 | 0.01  | 0.02  | 0.15   |
| 21356  | 'Tapbp'         | 16.77 | 23.38 | 18.7 | 41.7 | 60.3 | 34.92 | 32.3 | 18.44 | 84.7  | 74.43  |
| 21357  | 'Tarbp2'        | 14.26 | 6.37  | 19.1 | 23.3 | 6.67 | 15.78 | 25.8 | 31.4  | 18.92 | 17.32  |
| 213573 | 'Cracr2b'       | 0.44  | 0.03  | 0.09 | 0.08 | 0.06 | 0.03  | 0.04 | 0.03  | 0.05  | 0.05   |
| 213575 | 'Dync2li1'      | 60.69 | 50.17 | 49.9 | 10.2 | 22.8 | 66.75 | 57   | 31.1  | 33.05 | 51.57  |
| 213582 | 'Map9'          | 22.31 | 20.83 | 15.9 | 19   | 25.4 | 11.2  | 12   | 15.24 | 9.92  | 21.47  |
| 213603 | 'Slc44a3'       | 0     | 0     | 0    | 0    | 0    | 0     | 0    | 1.84  | 0.02  | 0.36   |
| 213649 | 'Arhgef19'      | 0.01  | 0     | 0    | 0    | 2.33 | 0.16  | 0    | 0     | 0     | 0      |
| 21366  | 'Slc6a6'        | 6.07  | 17    | 14.4 | 17.7 | 18   | 12.77 | 12.9 | 27.45 | 23.94 | 28.64  |
| 21367  | 'Cntn2'         | 4.62  | 3.9   | 13.7 | 8.38 | 7.32 | 6.8   | 2.15 | 1.3   | 4.89  | 4.5    |
| 213673 | '9530068E07Rik' | 83.81 | 92.13 | 60.1 | 46.8 | 60.2 | 81.57 | 70.5 | 86.97 | 118.7 | 123.85 |
| 213696 | 'Duoxa1'        | 0     | 0     | 3.8  | 0    | 0    | 0     | 0    | 0     | 0     | 0      |
| 21371  | 'Tbca'          | 192.6 | 191.5 | 246  | 201  | 86.2 | 160.1 | 358  | 156.7 | 186.7 | 188.94 |
| 21372  | 'Tbl1x'         | 19.1  | 21.66 | 21   | 14.1 | 35.6 | 10.02 | 8.48 | 32.22 | 31.44 | 29.54  |
| 21374  | 'Tbp'           | 14.68 | 7.96  | 12.8 | 12.8 | 21.3 | 9.89  | 4.45 | 25.05 | 24.21 | 13.81  |
| 21375  | 'Tbr1'          | 0     | 0     | 0.01 | 0    | 0.68 | 11.58 | 0.04 | 0.27  | 3.3   | 3.53   |
| 213753 | 'Zfp598'        | 1.13  | 5.36  | 2.71 | 2.66 | 1.3  | 2.45  | 1.25 | 2.92  | 1.06  | 0.35   |
| 21376  | 'Tbrg1'         | 34.33 | 63.52 | 67   | 112  | 74.7 | 95.89 | 46.3 | 49.74 | 104.2 | 78.86  |
| 213760 | 'Prepl'         | 206.5 | 172.9 | 243  | 201  | 134  | 51.94 | 225  | 170   | 174.5 | 239.24 |
| 213773 | 'Tbl3'          | 6.09  | 25.69 | 14.8 | 18.2 | 32.3 | 28.43 | 9.82 | 31.74 | 21.42 | 12.41  |
| 213783 | 'Plekhg1'       | 1.48  | 0     | 0    | 2.13 | 0.05 | 0.15  | 0    | 0.6   | 0.01  | 0      |
| 213788 | 'Chrm5'         | 2.34  | 3.91  | 0    | 0    | 5.56 | 0     | 0    | 0     | 5.04  | 3.52   |
| 21379  | 'Tbrg4'         | 10.83 | 10.42 | 14.8 | 2.35 | 1.02 | 7.78  | 14.7 | 8.04  | 12.31 | 4.79   |
| 213819 | 'Casd1'         | 16.47 | 15.82 | 10.8 | 19.2 | 14.8 | 5.87  | 16   | 14.74 | 21.14 | 19.58  |
| 213827 | 'Arcn1'         | 55.09 | 52.88 | 64.5 | 54.8 | 36.9 | 21.02 | 52.1 | 60.42 | 48.87 | 48.85  |
| 21385  | 'Tbx2'          | 0     | 0     | 0.53 | 0    | 0    | 0     | 0    | 0     | 0     | 0      |
| 21388  | 'Tbx5'          | 0     | 0     | 0    | 0    | 0    | 0     | 0    | 0     | 0.01  | 0      |
| 21389  | 'Tbx6'          | 0     | 0     | 0    | 0    | 0    | 0     | 1.82 | 0     | 0     | 0.33   |
| 213895 | 'Bms1'          | 3.74  | 6.72  | 3.68 | 6.23 | 6.48 | 4.74  | 15.9 | 4.54  | 9.26  | 4.77   |
| 21390  | 'Tbxa2r'        | 0     | 0     | 0    | 0.03 | 0    | 0     | 0    | 0     | 0     | 0      |
| 21391  | 'Tbxas1'        | 0     | 0.92  | 0    | 0    | 0    | 3.1   | 0    | 0     | 0     | 3.64   |

|        |                 |       |       |      |      |      |       |      |       |       |         |
|--------|-----------------|-------|-------|------|------|------|-------|------|-------|-------|---------|
| 21393  | 'Tcap'          | 1.5   | 0.26  | 9.23 | 1.44 | 1.4  | 2.92  | 1.32 | 0.66  | 1.61  | 1.22    |
| 213945 | 'Col28a1'       | 0     | 0.8   | 0    | 0    | 0.31 | 0     | 0    | 0     | 0     | 0       |
| 213948 | 'Atg9b'         | 1.46  | 5.46  | 4.5  | 1.65 | 3.57 | 6.98  | 12.7 | 3.38  | 7.56  | 3.63    |
| 213980 | 'Fbxw10'        | 0     | 0     | 1.39 | 0    | 3.8  | 0     | 0    | 0.46  | 1.73  | 0       |
| 213988 | 'Tnrc6b'        | 3.02  | 1.73  | 3.95 | 4.22 | 3.53 | 3.21  | 1.85 | 2.08  | 4.02  | 2.08    |
| 213989 | 'Tmem82'        | 0.37  | 0.27  | 0.3  | 0.44 | 0.64 | 0.48  | 0.33 | 0.14  | 0.65  | 0.61    |
| 21399  | 'Tcea1'         | 55.35 | 49.88 | 58.4 | 49.2 | 39   | 36.79 | 26.5 | 50.71 | 54.86 | 33.93   |
| 213990 | 'Agap3'         | 18.68 | 14.53 | 26.6 | 28.3 | 19.1 | 24.61 | 23.8 | 8.23  | 22.68 | 19.43   |
| 213993 | 'Ccdc186'       | 9.52  | 10.34 | 8.3  | 7.51 | 14.6 | 10.56 | 5.72 | 11.51 | 5.56  | 9.97    |
| 21400  | 'Tcea2'         | 102.9 | 88.65 | 79.5 | 116  | 74.3 | 82.23 | 93.7 | 129.8 | 103.7 | 119.51  |
| 21401  | 'Tcea3'         | 0.29  | 1.93  | 0.08 | 0.05 | 0.85 | 0     | 0.04 | 1.35  | 0.46  | 0.14    |
| 21402  | 'Skp1a'         | 868.6 | 1026  | 735  | 597  | 966  | 1160  | 905  | 1181  | 871.3 | 1010.73 |
| 214048 | 'Larp1b'        | 1.46  | 0.48  | 0.08 | 0.03 | 2.78 | 0.23  | 0.58 | 0.58  | 1.54  | 2.25    |
| 21405  | 'Hnf1a'         | 0     | 0.42  | 1.3  | 0    | 0    | 0     | 0    | 0     | 0.88  | 0       |
| 214058 | 'Megf11'        | 6.8   | 3.2   | 30.2 | 2.55 | 12.5 | 4.41  | 2.17 | 4.1   | 0.97  | 2.04    |
| 21406  | 'Tcf12'         | 1.45  | 2.31  | 2.21 | 0.43 | 0.14 | 0.01  | 1.05 | 0.73  | 1.81  | 1.45    |
| 214063 | 'Dnajc16'       | 10.49 | 3.84  | 9.1  | 8.38 | 6.28 | 0.46  | 0.55 | 16.49 | 4.83  | 15      |
| 21408  | 'Zfp354a'       | 1.91  | 1.08  | 0    | 5.62 | 6.18 | 0     | 2.48 | 1.72  | 0.3   | 1.49    |
| 214084 | 'Slc18a2'       | 8.15  | 30.92 | 0.31 | 20.1 | 4.27 | 1.65  | 0.25 | 2.67  | 9.54  | 0.79    |
| 21410  | 'Hnf1b'         | 5.63  | 9.55  | 8.86 | 4.03 | 3.6  | 2.7   | 0    | 12.41 | 9.51  | 3.38    |
| 214106 | '4933430117Rik' | 0     | 0     | 2.44 | 0.23 | 0.13 | 0     | 0    | 0     | 0     | 1.16    |
| 21411  | 'Tcf20'         | 7.35  | 6.26  | 7.91 | 8.26 | 10.3 | 4.83  | 4.24 | 4.82  | 5.1   | 7.54    |
| 214111 | 'Slc24a1'       | 0.25  | 1.13  | 1.25 | 2.16 | 1.58 | 0     | 0    | 0     | 0.01  | 0       |
| 214112 | 'Nipal4'        | 0     | 0.89  | 0    | 0    | 0    | 2.94  | 0    | 1.3   | 0     | 0       |
| 21413  | 'Tcf4'          | 8.98  | 7.69  | 5.25 | 13.5 | 6.79 | 12.7  | 8.27 | 7.9   | 1.97  | 4.72    |
| 214133 | 'Tet2'          | 1.55  | 3.55  | 1.88 | 3.5  | 0.57 | 2.58  | 5.09 | 2.12  | 1.65  | 0.41    |
| 214137 | 'Arhgap29'      | 0.47  | 0.05  | 0.02 | 0    | 0    | 0.53  | 0    | 0     | 1.18  | 0       |
| 21414  | 'Tcf7'          | 0     | 0     | 0    | 0    | 0    | 0.02  | 0    | 0.2   | 0     | 0       |
| 21415  | 'Tcf7l1'        | 0.06  | 0.7   | 0    | 0    | 0    | 0     | 0.05 | 0     | 0     | 0       |
| 214150 | 'Ago3'          | 6.17  | 6.62  | 3.5  | 11.5 | 2.45 | 2.12  | 6.77 | 1.72  | 6.93  | 3.77    |
| 21416  | 'Tcf7l2'        | 12.11 | 4.15  | 3.35 | 4.55 | 1.1  | 1.54  | 2.61 | 4.71  | 7.04  | 0.36    |
| 214162 | 'Kmt2a'         | 5.39  | 3.36  | 4.26 | 7.61 | 3.8  | 6.85  | 7.43 | 3     | 5.3   | 4.05    |
| 21417  | 'Zeb1'          | 13.32 | 9.05  | 9.43 | 12.4 | 9.52 | 6.37  | 18.7 | 9.2   | 7.13  | 7.88    |
| 21418  | 'Tfap2a'        | 0     | 0     | 0    | 0    | 0    | 0     | 0    | 0     | 0.01  | 0.01    |
| 214189 | 'Scgn'          | 6.28  | 18.22 | 0.03 | 0.7  | 0.07 | 0.03  | 0    | 1.82  | 0     | 0       |
| 214191 | 'Ttc24'         | 0     | 1.15  | 0    | 0    | 0    | 0     | 0    | 0     | 0     | 0       |
| 21422  | 'Tfcp2'         | 11.1  | 7.79  | 5.99 | 11.3 | 7.67 | 4.29  | 12.4 | 6.4   | 11.07 | 13.5    |
| 21423  | 'Tcf3'          | 1.58  | 2.25  | 0.13 | 0.17 | 0.11 | 2.42  | 0    | 3.71  | 3.7   | 3.52    |
| 214230 | 'Pak6'          | 8.26  | 18.57 | 15.3 | 25.4 | 7.54 | 10.57 | 19.4 | 7.54  | 9.83  | 14.23   |
| 214239 | 'Ccdc9b'        | 0.32  | 0.28  | 1.18 | 0    | 0    | 0     | 1.59 | 1.36  | 0     | 0       |
| 214240 | 'Disp2'         | 39.95 | 40.36 | 100  | 30   | 33.9 | 23.23 | 64.4 | 39.53 | 47.71 | 54.95   |
| 21425  | 'Tfeb'          | 0     | 0     | 0.02 | 0    | 0.72 | 1.38  | 0    | 0     | 0     | 0       |
| 214253 | 'Etnk2'         | 9.37  | 2.82  | 10.1 | 11.1 | 10.6 | 9.93  | 6.25 | 14.61 | 12.78 | 4.92    |
| 214254 | 'Nudt15'        | 6.13  | 1.86  | 2.24 | 0    | 2.76 | 4.71  | 3.95 | 0.51  | 0.02  | 2.45    |
| 21427  | 'Vps72'         | 54.24 | 55.51 | 44   | 37.9 | 54.9 | 91.86 | 30.8 | 60.34 | 55.16 | 52.81   |
| 21428  | 'Mlx'           | 58.47 | 54.43 | 33   | 45.1 | 23.6 | 25.06 | 65.6 | 49.96 | 35.39 | 30.38   |
| 21429  | 'Ubf'           | 15.35 | 8.09  | 15.5 | 3.71 | 16.8 | 25.29 | 23   | 3.32  | 12.65 | 12.91   |
| 214290 | 'Tut7'          | 3.35  | 3     | 4.7  | 2.17 | 2.98 | 1.33  | 6.71 | 3.28  | 1.75  | 2.54    |
| 214292 | 'Syna'          | 0     | 1.34  | 1.5  | 0    | 0    | 0     | 0    | 0     | 2.76  | 0       |
| 214301 | 'Crygn'         | 0.4   | 0.09  | 0    | 0    | 0.26 | 0.25  | 0.27 | 0     | 0.55  | 0.23    |
| 214305 | 'Hhip1'         | 0.55  | 0     | 0.02 | 0    | 0.41 | 0     | 1.32 | 0     | 0     | 0.03    |
| 214321 | 'Gm4787'        | 0.28  | 0     | 3.35 | 0    | 0.41 | 0     | 0    | 1.17  | 0     | 0.65    |
| 214345 | 'Lrrc1'         | 0     | 1.02  | 0.03 | 0.06 | 5.39 | 0.66  | 0.02 | 2.1   | 2.84  | 0.26    |
| 214359 | 'Tmem51'        | 4.86  | 2.57  | 0.03 | 10.2 | 4.35 | 0     | 0    | 0     | 0     | 0       |
| 214384 | 'Myocd'         | 0     | 0.01  | 2.06 | 0.01 | 0    | 0     | 1.28 | 0.01  | 0.01  | 0.01    |
| 214424 | 'Parp16'        | 6.9   | 7.46  | 4.77 | 7.03 | 4.01 | 3.7   | 4.55 | 0.77  | 2.63  | 2.25    |
| 214425 | 'Cilp'          | 0     | 0     | 0    | 0    | 0    | 0     | 0    | 0     | 0     | 1.69    |
| 214444 | 'Cdk5rap2'      | 0     | 0.15  | 0    | 0.68 | 0.12 | 0     | 0.79 | 0.07  | 0.87  | 0.17    |

|        |            |       |       |      |      |      |       |      |       |       |        |
|--------|------------|-------|-------|------|------|------|-------|------|-------|-------|--------|
| 214459 | 'Fnbp1l'   | 12.34 | 16.15 | 13.1 | 9.51 | 12.7 | 16.04 | 18   | 18.59 | 16.11 | 21.78  |
| 214469 | 'Fam168b'  | 3.62  | 5.21  | 7.91 | 20.2 | 14.6 | 11.68 | 13.5 | 4.04  | 10.39 | 1.84   |
| 214489 | 'BC003965' | 18.68 | 19.63 | 17   | 17.4 | 13.8 | 21.68 | 15.3 | 22.95 | 13.52 | 7.86   |
| 214498 | 'Cdc73'    | 2.9   | 0.99  | 1.3  | 2.46 | 2    | 1.25  | 1.64 | 1.28  | 1.15  | 3.01   |
| 214505 | 'Gnptg'    | 182.7 | 253   | 155  | 146  | 162  | 272.6 | 188  | 137.2 | 213.9 | 308.82 |
| 21452  | 'Tcn2'     | 3.99  | 3.34  | 6.28 | 20.4 | 0.03 | 38.62 | 13.5 | 10.05 | 9.93  | 14.64  |
| 21453  | 'Tcof1'    | 6.78  | 2.28  | 4.58 | 7.58 | 0.99 | 1.03  | 9.8  | 9.32  | 4.7   | 4.81   |
| 21454  | 'Tcp1'     | 147.9 | 167.9 | 91.6 | 91.6 | 111  | 167.1 | 129  | 134.9 | 107.5 | 133.73 |
| 214552 | 'Cep164'   | 2.33  | 2.28  | 4.7  | 14.9 | 4.41 | 5.95  | 1.71 | 3.1   | 2.94  | 1.17   |
| 214568 | 'Gm136'    | 0     | 0     | 0    | 4.51 | 0    | 0     | 0    | 0     | 0     | 0      |
| 214572 | 'Prmt7'    | 26.77 | 65.66 | 36.7 | 66.7 | 66   | 93.31 | 43.8 | 70.55 | 55.9  | 50.37  |
| 214575 | 'Tdrd5'    | 0.22  | 0.68  | 2.99 | 0.59 | 0.38 | 1.1   | 0    | 2.02  | 0.12  | 5.7    |
| 214579 | 'Aldh5a1'  | 4.98  | 2.97  | 5.64 | 5.4  | 6.63 | 2.22  | 9.48 | 2.89  | 5.19  | 1.96   |
| 214580 | 'Pstk'     | 23    | 33.66 | 31.9 | 15   | 39.2 | 29.39 | 23.8 | 22.32 | 6.89  | 17.49  |
| 214585 | 'Spg11'    | 0.35  | 0.38  | 0    | 0.79 | 2.2  | 0.11  | 0.64 | 1.1   | 3.13  | 0.52   |
| 214597 | 'Sidt2'    | 2     | 4.06  | 8.6  | 7.14 | 9.47 | 2.67  | 10.1 | 6.92  | 8.15  | 3.02   |
| 214601 | 'Slc10a3'  | 6.78  | 7.69  | 3.87 | 0.03 | 0    | 3.21  | 0    | 3.23  | 8.41  | 13.99  |
| 21461  | 'Tcp10a'   | 0     | 0.03  | 0    | 0    | 0    | 0     | 0    | 0.07  | 0     | 0      |
| 214616 | 'Spata5l1' | 0.54  | 0.35  | 0    | 5.91 | 1.32 | 1.13  | 0    | 0     | 0     | 1.1    |
| 21462  | 'Tcp10b'   | 0     | 0.3   | 0    | 0    | 0    | 0     | 0    | 0.68  | 0     | 0      |
| 214627 | 'Tent4b'   | 0.74  | 0.78  | 5.39 | 6.16 | 1.98 | 2.36  | 3.56 | 0.9   | 0.19  | 4.2    |
| 21463  | 'Tcp11'    | 0.33  | 3.47  | 0.55 | 3.25 | 0    | 0     | 0    | 0.23  | 0.24  | 0.27   |
| 214642 | 'Cped1'    | 0     | 0     | 0.1  | 0.21 | 0    | 0.89  | 0.9  | 0     | 1.98  | 0.07   |
| 214663 | 'Slc25a29' | 17.6  | 27.14 | 20.6 | 15.2 | 25.3 | 10.2  | 30.4 | 7.87  | 31.8  | 9.68   |
| 214669 | 'L3mbtl2'  | 12.41 | 21.5  | 21.6 | 15.4 | 26.9 | 16.37 | 8.07 | 24.48 | 24.42 | 25.76  |
| 214685 | 'Chadl'    | 3.16  | 4.97  | 4.2  | 9.76 | 9.14 | 4.25  | 7.89 | 11.08 | 9.1   | 11.39  |
| 214704 | 'Iqub'     | 2.44  | 1.4   | 0.73 | 0    | 1.03 | 4.6   | 0.02 | 0.89  | 1.21  | 2.45   |
| 214742 | 'Rcor3'    | 10.75 | 11.9  | 12.4 | 16.2 | 11.4 | 8.85  | 4.38 | 9.8   | 6.77  | 14     |
| 214763 | 'Cgas'     | 0.64  | 0     | 0.1  | 0.03 | 1.28 | 0.02  | 0.02 | 0.06  | 0     | 0.92   |
| 214764 | 'Edrf1'    | 3.14  | 3.12  | 0.58 | 10.2 | 0.11 | 1.16  | 6.9  | 2.15  | 3.28  | 0.17   |
| 214766 | 'Mmp21'    | 0     | 0     | 0.21 | 0    | 0    | 0.38  | 0    | 0     | 0     | 0      |
| 214779 | 'Zfp879'   | 0.12  | 0     | 0    | 0    | 0.12 | 0     | 5.48 | 0.5   | 3.26  | 0      |
| 214791 | 'Sertad4'  | 3.27  | 1.35  | 0.77 | 7.09 | 8    | 1.44  | 0    | 2.48  | 6.42  | 3.9    |
| 214804 | 'Syde2'    | 0.22  | 0     | 0.01 | 0    | 0.26 | 0     | 0.01 | 0     | 0     | 0.06   |
| 214812 | 'Zfp609'   | 1.06  | 1.06  | 1.15 | 0    | 0.89 | 0.29  | 0.01 | 1.04  | 2.05  | 0.98   |
| 214854 | 'Neurl3'   | 0.03  | 3.09  | 0.14 | 0    | 0.02 | 0     | 0.02 | 0.02  | 0.02  | 0      |
| 214855 | 'Arid5a'   | 1.37  | 2.86  | 3.6  | 0.02 | 0.97 | 1.56  | 0    | 0     | 1.51  | 3.01   |
| 214895 | 'Lman2l'   | 76.61 | 62.39 | 37.2 | 26.4 | 71.1 | 76.49 | 59.3 | 48.63 | 68.08 | 117.91 |
| 214897 | 'Csnk1g1'  | 5.53  | 2.44  | 2.07 | 2.96 | 0.98 | 1.79  | 4.15 | 0.87  | 6.45  | 3.31   |
| 214899 | 'Kdm5a'    | 8.95  | 8.01  | 12.2 | 10.6 | 3.31 | 10.34 | 10.5 | 12.05 | 9.81  | 8.46   |
| 214901 | 'Chtf18'   | 0     | 0     | 0    | 0    | 0    | 0.1   | 0    | 0     | 0     | 0      |
| 214917 | 'Fam173a'  | 212   | 190.4 | 213  | 135  | 285  | 261.6 | 295  | 217.7 | 161.4 | 225.98 |
| 214922 | 'Slc39a2'  | 2.29  | 1.67  | 0    | 0    | 0.15 | 0     | 0    | 0     | 0     | 2.24   |
| 214931 | 'Fbxl16'   | 36.2  | 24.57 | 30.3 | 10.3 | 26.7 | 18.82 | 28.7 | 27.59 | 22.17 | 16.04  |
| 214932 | 'Hdhd5'    | 13.27 | 9.18  | 13.4 | 34.2 | 15   | 18.8  | 19.1 | 12.55 | 23.06 | 5.61   |
| 214944 | 'Mob3b'    | 2.32  | 0.68  | 0.03 | 0.01 | 0.92 | 0.02  | 0.01 | 2.5   | 0.01  | 0.01   |
| 214951 | 'Rhbdl1'   | 19.46 | 27.84 | 15.6 | 38.2 | 22.8 | 19.76 | 15.2 | 53.75 | 77.26 | 52.21  |
| 214952 | 'Rhot2'    | 24.57 | 23.24 | 15.8 | 36.1 | 16.1 | 31.65 | 10.5 | 20.15 | 22.73 | 27.84  |
| 214968 | 'Sema6d'   | 5.82  | 5.82  | 5.88 | 0.01 | 11.2 | 6.22  | 1.72 | 3.65  | 9.07  | 8.28   |
| 214987 | 'Chtf8'    | 10.71 | 21.47 | 15.2 | 6.99 | 13.9 | 6.73  | 13   | 18.27 | 14.86 | 23.32  |
| 215001 | 'Wfikkn1'  | 0     | 1.47  | 3    | 1.76 | 0    | 2.09  | 0    | 0     | 2.67  | 0      |
| 215008 | 'Vezt'     | 7.55  | 4.6   | 4.2  | 4.24 | 4.04 | 4.82  | 3.63 | 4.51  | 2.94  | 3.28   |
| 215015 | 'Fam20b'   | 8.84  | 13.39 | 7.44 | 11.5 | 12.6 | 4.7   | 2.76 | 6.01  | 23.14 | 13.03  |
| 215051 | 'Bud13'    | 5.16  | 2.54  | 1.15 | 5.02 | 8.53 | 1.91  | 9.74 | 3.13  | 6.32  | 6.66   |
| 215085 | 'Slc35f1'  | 4.91  | 2.63  | 9.7  | 9.37 | 11.1 | 1.7   | 7.43 | 4.54  | 6.02  | 8.86   |
| 215090 | 'Maneal'   | 4.71  | 6.05  | 18.7 | 2.65 | 15.6 | 5.29  | 14.3 | 13    | 1.5   | 1.33   |
| 215113 | 'Slc43a2'  | 5.94  | 7.73  | 2.62 | 11.2 | 5.15 | 4.97  | 11.1 | 6.71  | 6.51  | 3.42   |
| 215114 | 'Hip1'     | 1.45  | 1.05  | 2.17 | 1.75 | 0.26 | 2.37  | 0.45 | 2.54  | 1.14  | 0.1    |

|        |             |       |       |      |      |      |       |      |       |       |        |
|--------|-------------|-------|-------|------|------|------|-------|------|-------|-------|--------|
| 215160 | 'Rhbdd2'    | 219.5 | 167   | 232  | 144  | 193  | 249.3 | 252  | 228.1 | 226.2 | 316.25 |
| 215193 | 'Diexf'     | 1.37  | 4.93  | 1.21 | 5.01 | 8.11 | 0     | 15.7 | 5.97  | 5.29  | 4.34   |
| 215194 | 'Kri1'      | 15.71 | 16.12 | 8.53 | 14.2 | 8.33 | 12.76 | 5.12 | 5.81  | 4.09  | 12.82  |
| 215201 | 'Trmt2b'    | 2.29  | 3.77  | 4.03 | 4.2  | 4.12 | 0     | 0    | 8.84  | 20.98 | 13.04  |
| 215210 | 'Tmem120a'  | 32.65 | 37.79 | 11.1 | 16.6 | 12.6 | 35.29 | 11   | 29.97 | 16.35 | 5.53   |
| 215243 | 'Traf3ip3'  | 0     | 0     | 0    | 0    | 0.02 | 4.2   | 0    | 0     | 0     | 0      |
| 215257 | 'Il1f9'     | 1.62  | 1.53  | 1.71 | 2.34 | 2.2  | 1.68  | 0.58 | 0.98  | 2.31  | 1.46   |
| 215280 | 'Wipf1'     | 0     | 0     | 0.64 | 0.98 | 0.15 | 1.2   | 0.01 | 0.3   | 0     | 0.05   |
| 215303 | 'Camk1g'    | 46.91 | 36.08 | 41.1 | 13   | 25.5 | 60.81 | 50.9 | 45.14 | 40.74 | 36.56  |
| 215335 | 'Slc36a1'   | 1.35  | 0     | 2    | 0.88 | 0.01 | 1.67  | 0    | 2.14  | 2.01  | 1.83   |
| 215351 | 'Senp6'     | 1.21  | 3.31  | 3.25 | 11   | 6.98 | 4.99  | 1.89 | 2.48  | 2.06  | 4.05   |
| 215378 | 'Brinp3'    | 20.15 | 40.67 | 22   | 0.8  | 5.47 | 29.62 | 37.9 | 26.12 | 34.15 | 43.95  |
| 215387 | 'Ncaph'     | 0     | 0.11  | 2.57 | 0.02 | 0    | 2.76  | 0    | 0.92  | 0.05  | 0      |
| 215418 | 'Csrnp1'    | 0.55  | 9.97  | 8.91 | 24.7 | 0.07 | 7.08  | 9.1  | 0     | 5.08  | 5.08   |
| 215436 | 'Slc35e3'   | 3.34  | 6.4   | 7.77 | 8.44 | 6.12 | 0.63  | 3.61 | 4.43  | 13.58 | 9.06   |
| 215445 | 'Rab11fip3' | 5.28  | 4.95  | 3.18 | 7.12 | 4.46 | 3.02  | 5.27 | 6.44  | 2.01  | 0.56   |
| 215446 | 'Entpd3'    | 7.03  | 2.27  | 13.1 | 1.97 | 2.32 | 2.5   | 0    | 7.91  | 9.33  | 1.59   |
| 215449 | 'Rap1b'     | 15.67 | 6.81  | 7.64 | 16.8 | 9.86 | 16.33 | 5.96 | 6.85  | 25.91 | 10.79  |
| 215456 | 'Gpat2'     | 0     | 0     | 0    | 0    | 0.32 | 0     | 0    | 0     | 0     | 0      |
| 215467 | 'Gm4791'    | 0.45  | 0.57  | 1.24 | 1.81 | 1.2  | 1.02  | 1.49 | 0.33  | 0.92  | 1.04   |
| 215474 | 'Sec22c'    | 7.53  | 12.25 | 4.98 | 6.97 | 0.93 | 6.45  | 3.3  | 0.32  | 10.46 | 4.52   |
| 215476 | 'Prr14l'    | 3.13  | 7.55  | 5.84 | 4.89 | 2.24 | 3.23  | 6.82 | 5.45  | 3.73  | 3.88   |
| 215493 | 'A3galt2'   | 0     | 0.15  | 0.01 | 0    | 3.82 | 0     | 0    | 0     | 0.01  | 0      |
| 215494 | 'Pomgnt2'   | 109.1 | 93.47 | 103  | 63.2 | 58.1 | 102.9 | 56.8 | 120.1 | 67.51 | 121.06 |
| 215512 | 'Fam117a'   | 0.13  | 0.02  | 0.68 | 0.42 | 6.15 | 0.39  | 0.02 | 0.03  | 0     | 0.09   |
| 215615 | 'Rnpep'     | 28.81 | 29.46 | 15.1 | 2.97 | 17.7 | 56.16 | 16.7 | 27.05 | 26.72 | 30.29  |
| 215627 | 'Zbtb8b'    | 2.1   | 0.51  | 2.59 | 0.83 | 2.39 | 0.41  | 0.63 | 1.36  | 0.52  | 0.55   |
| 215632 | 'Psd4'      | 0     | 0     | 0    | 0    | 2.17 | 0     | 0    | 0     | 0     | 0      |
| 215653 | 'Rassf2'    | 2.92  | 3.29  | 3.95 | 0    | 7.64 | 0.12  | 8.66 | 1.34  | 0.67  | 3.27   |
| 215654 | 'Cdh12'     | 2.01  | 0.81  | 1.06 | 3.18 | 0.48 | 1.33  | 2.37 | 6.61  | 11.07 | 4.13   |
| 215690 | 'Nav1'      | 6.2   | 7.27  | 5.57 | 12   | 5.32 | 5.78  | 9.38 | 5.99  | 4.05  | 4.53   |
| 215693 | 'Zmat1'     | 18.87 | 14.19 | 16.5 | 12.9 | 7.57 | 20.46 | 7.96 | 26.86 | 18.59 | 20     |
| 215705 | 'Arrdc1'    | 9.72  | 17.07 | 12.2 | 26.6 | 12.5 | 16.02 | 3.82 | 17.67 | 26.23 | 23.43  |
| 215707 | 'Ccadc92'   | 58.14 | 26.29 | 49.1 | 64.7 | 18.7 | 26.3  | 62.7 | 40.42 | 48.54 | 11.83  |
| 215708 | 'Miga1'     | 4.86  | 2.35  | 4.28 | 8.65 | 5.01 | 6.94  | 6.79 | 6.88  | 5.6   | 9.94   |
| 215748 | 'Cnksr3'    | 0     | 0     | 0    | 0    | 0.03 | 0     | 0.01 | 0     | 0.58  | 0      |
| 215751 | 'Ginm1'     | 41.7  | 50.95 | 38.2 | 64.6 | 23.1 | 21.58 | 22.1 | 38.16 | 33.2  | 26.93  |
| 215772 | 'Adgb'      | 1.03  | 0     | 0.01 | 3.53 | 0    | 0     | 0    | 1.15  | 0     | 0      |
| 215789 | 'Phactr2'   | 13.95 | 10.7  | 8.37 | 11.4 | 21.3 | 29.37 | 3    | 18.14 | 4.17  | 16.6   |
| 215814 | 'Ccadc28a'  | 95.97 | 42.3  | 54.9 | 56.2 | 67.1 | 83.8  | 54.9 | 92.6  | 65.28 | 40.72  |
| 215819 | 'Nhsl1'     | 0.36  | 1.29  | 2.94 | 7.95 | 0.02 | 0.27  | 0.01 | 0.6   | 0.35  | 0.82   |
| 215821 | 'Arfgef3'   | 6.56  | 5.29  | 8.06 | 4.45 | 4.55 | 1.55  | 3.29 | 3.53  | 12.3  | 7.51   |
| 215890 | 'Clvs2'     | 9.77  | 17.96 | 27.6 | 6.09 | 12.6 | 16.04 | 16.7 | 28.76 | 20.37 | 15.21  |
| 215900 | 'Calhm6'    | 0.04  | 0     | 0    | 0    | 0    | 5.5   | 0    | 0     | 0     | 0      |
| 215928 | 'Mfsd4b5'   | 0.17  | 0.41  | 0.16 | 0.02 | 0.09 | 0.41  | 0.39 | 0.05  | 0.12  | 0.06   |
| 215929 | 'Mfsd4b1'   | 0.33  | 0.2   | 0.11 | 0    | 0.05 | 4.26  | 3.35 | 1.45  | 2.38  | 0.03   |
| 215951 | 'Afg1l'     | 7.41  | 9.64  | 5.26 | 11.8 | 10.9 | 11.2  | 6.3  | 10.23 | 2.47  | 11.86  |
| 215999 | 'Mcu'       | 11.01 | 6.93  | 20.1 | 9.45 | 17.6 | 3.19  | 8.3  | 10.69 | 7.36  | 0.06   |
| 216001 | 'Micu1'     | 33.79 | 32.48 | 42.5 | 17.3 | 26.9 | 27.43 | 22   | 23.86 | 10.51 | 17.93  |
| 216011 | 'Lrrc20'    | 5.86  | 2.2   | 3.52 | 0.05 | 11   | 4.7   | 1.5  | 8.24  | 4.97  | 3.29   |
| 216019 | 'Hkdc1'     | 0     | 0     | 0    | 0    | 0    | 0     | 0.35 | 0     | 0     | 0      |
| 216021 | 'Stox1'     | 2.54  | 0.54  | 0.96 | 1.63 | 2.55 | 1.97  | 0.03 | 0     | 1.94  | 1.43   |
| 216028 | 'Lrrtm3'    | 25.57 | 31.64 | 33.3 | 36.8 | 20.7 | 15.24 | 52   | 25.07 | 22.56 | 18.51  |
| 216033 | 'Ctnna3'    | 1.62  | 0     | 0.64 | 0    | 0.48 | 0.02  | 0    | 0     | 0.01  | 0      |
| 216049 | 'Zfp365'    | 20.96 | 17.2  | 11.3 | 9.18 | 29   | 8.23  | 9.44 | 7.07  | 11.86 | 8.89   |
| 216080 | 'Ube2d1'    | 27.5  | 16.39 | 27.3 | 8.78 | 20.3 | 14.57 | 32.6 | 15.14 | 22.67 | 9.54   |
| 216119 | 'Ybey'      | 2.6   | 3.22  | 1.17 | 6.08 | 5.09 | 0.13  | 5.05 | 4.93  | 1.28  | 2.66   |
| 216131 | 'Trappc10'  | 2.21  | 2.4   | 1.77 | 1.77 | 2.4  | 8.6   | 9.95 | 4.17  | 0.99  | 2.86   |

|        |                 |       |       |      |      |      |       |      |       |       |        |
|--------|-----------------|-------|-------|------|------|------|-------|------|-------|-------|--------|
| 216134 | 'Pdxk'          | 66.37 | 49.76 | 79.2 | 17.9 | 52.4 | 46.89 | 63.4 | 47.43 | 67.19 | 58.11  |
| 216136 | 'Ilvbl'         | 39.65 | 22.73 | 30.3 | 7.52 | 18.5 | 26.46 | 11.5 | 19.47 | 19.48 | 32.4   |
| 216148 | 'Shc2'          | 1.6   | 5.33  | 4.44 | 0.59 | 0.64 | 0.02  | 0.88 | 1.8   | 5.46  | 2.72   |
| 216150 | 'Cdc34'         | 40.4  | 31.75 | 28.4 | 7.13 | 35.5 | 27.99 | 7.74 | 20.92 | 24.1  | 12.58  |
| 216151 | 'Polrmt'        | 9.76  | 7.7   | 10.3 | 3.77 | 11.3 | 6.11  | 8.61 | 6.71  | 9.32  | 6.46   |
| 216152 | 'Plppr3'        | 78.51 | 71.31 | 80.7 | 44.6 | 63.8 | 50.55 | 84.4 | 83.96 | 92.82 | 104.45 |
| 216154 | 'Med16'         | 3.35  | 10.46 | 7.94 | 7.89 | 9.85 | 12.42 | 4.58 | 4.15  | 2.67  | 8.03   |
| 216156 | 'Wdr18'         | 66.74 | 68.14 | 46.8 | 56.6 | 66.1 | 134.2 | 78.3 | 98.09 | 90.89 | 75.18  |
| 216157 | 'Tmem259'       | 3.03  | 0.84  | 1.47 | 6.96 | 5.6  | 1.33  | 0.65 | 2.92  | 3.26  | 2.19   |
| 216161 | 'Sbno2'         | 2.27  | 0.89  | 2.24 | 0.39 | 2.25 | 0     | 3.66 | 0.21  | 0.36  | 1.37   |
| 216166 | 'Plk5'          | 3.96  | 5.97  | 0.05 | 0.3  | 57.8 | 6.09  | 24.4 | 8     | 0.02  | 16.72  |
| 216169 | 'Abhd17a'       | 5.12  | 5.76  | 6.03 | 8.09 | 14.7 | 10.54 | 9.92 | 2.54  | 18.39 | 13.24  |
| 216177 | 'AU041133'      | 7.77  | 0.05  | 0.54 | 1.68 | 0.69 | 2.91  | 0    | 0.82  | 2.83  | 9.44   |
| 216188 | 'Aldh1l2'       | 1.92  | 1.89  | 0.02 | 0    | 3.25 | 0     | 4.53 | 3.34  | 2.6   | 1.67   |
| 216190 | 'Appl2'         | 1.9   | 14.86 | 12.9 | 6.15 | 4.96 | 6.05  | 4.57 | 7.71  | 2.57  | 5.74   |
| 216197 | 'Ckap4'         | 4.88  | 2.61  | 8.78 | 0    | 7.65 | 3.12  | 1.19 | 4.79  | 2.46  | 3.75   |
| 216198 | 'Tcp11l2'       | 24.48 | 22.91 | 9.3  | 20.5 | 22.8 | 24.51 | 18.1 | 19.97 | 11.03 | 23.05  |
| 216225 | 'Slc5a8'        | 0     | 0     | 0.73 | 0    | 0    | 0     | 0    | 0     | 0     | 0      |
| 216227 | 'Slc17a8'       | 0.02  | 2.63  | 0.02 | 0.12 | 0.09 | 0.02  | 0.02 | 0.02  | 0.08  | 0.11   |
| 216233 | 'Socs2'         | 5.75  | 6.54  | 8.01 | 20.5 | 19.5 | 6.65  | 5.41 | 6.79  | 4.02  | 19.62  |
| 216238 | 'Eea1'          | 3.76  | 2.51  | 3.88 | 8.7  | 3.4  | 1.86  | 3.19 | 2.93  | 3.38  | 3.84   |
| 216274 | 'Cep290'        | 3.03  | 2.78  | 3.01 | 1.87 | 3.1  | 2.53  | 3.23 | 0.93  | 3.37  | 4.98   |
| 216292 | 'Mettl25'       | 6.12  | 10.07 | 8.76 | 4.01 | 7.91 | 8.41  | 7.43 | 6.11  | 13.11 | 11.35  |
| 216343 | 'Tph2'          | 0     | 0     | 0    | 0    | 1.42 | 0     | 0    | 0     | 0     | 7.94   |
| 216344 | 'Rab21'         | 6.46  | 6.12  | 3.1  | 13   | 4.5  | 0.03  | 3.67 | 1.62  | 2.84  | 8.55   |
| 216345 | 'Zfc3h1'        | 1.86  | 2.63  | 1.36 | 2.17 | 1.69 | 1.34  | 1.46 | 2.06  | 2.11  | 1.37   |
| 216363 | 'Rab3ip'        | 5.8   | 10.56 | 11.4 | 10.7 | 12.3 | 5.09  | 10.6 | 13.45 | 13.95 | 2.14   |
| 216393 | 'D930020B18Rik' | 0.11  | 1.37  | 0.21 | 22.7 | 6.48 | 2.8   | 2.42 | 0.45  | 0.92  | 5.08   |
| 216395 | 'Tmem5'         | 35.62 | 35.65 | 30.2 | 10.3 | 30.1 | 35    | 4.39 | 20.18 | 33.02 | 15.28  |
| 216438 | 'March9'        | 0.8   | 0     | 0    | 2.89 | 0    | 0     | 0    | 0     | 0     | 1.62   |
| 216439 | 'Agap2'         | 2.41  | 1.98  | 0.32 | 0.08 | 0.11 | 1.41  | 5.35 | 0.34  | 2.75  | 1.34   |
| 216440 | 'Os9'           | 49.77 | 87.71 | 53.6 | 34.8 | 41.1 | 56.13 | 53.1 | 67.93 | 95.18 | 57.38  |
| 216441 | 'Slc26a10'      | 2.71  | 0     | 0.15 | 0    | 0.42 | 0.1   | 0.02 | 0     | 0.26  | 0      |
| 216443 | 'Mars'          | 29.31 | 60.92 | 19.5 | 34.5 | 28.7 | 45.54 | 48.9 | 29.01 | 39.88 | 31.04  |
| 216445 | 'Arhgap9'       | 0.52  | 0     | 3.44 | 0.16 | 0    | 0     | 0    | 0     | 0     | 0      |
| 21645  | 'Tcte1'         | 0     | 4.75  | 0    | 0.57 | 0.05 | 0     | 0.07 | 0.28  | 11.12 | 0      |
| 216456 | 'Gls2'          | 10.91 | 15.03 | 11.5 | 0.07 | 2.16 | 0.19  | 11.3 | 5.06  | 13.58 | 4.96   |
| 216459 | 'Myl6b'         | 1.3   | 0.39  | 0.05 | 0.92 | 0.64 | 1.67  | 0.62 | 0.17  | 0.65  | 0.43   |
| 21646  | 'Tcte2'         | 0.03  | 3.85  | 0    | 0    | 0    | 0     | 0    | 0     | 0     | 2.83   |
| 21647  | 'Tcte3'         | 0     | 0     | 0    | 0    | 0    | 0.26  | 0    | 0     | 0     | 0      |
| 21648  | 'Dynl1b'        | 65.65 | 66.41 | 20.4 | 26   | 89.1 | 34.8  | 41.7 | 45.88 | 55.46 | 58.39  |
| 216505 | 'Pik3ip1'       | 37.57 | 24.1  | 17.2 | 25.2 | 47.2 | 19.04 | 36.5 | 20.56 | 21.49 | 6.74   |
| 216516 | 'Ccdc157'       | 3.17  | 6.48  | 8.96 | 7.44 | 3.76 | 4.62  | 3.38 | 0.79  | 5.98  | 2.6    |
| 21652  | 'Phf1'          | 32.2  | 40.07 | 38.3 | 17.6 | 32   | 27.37 | 22.9 | 16.8  | 16.14 | 13.48  |
| 216527 | 'Ccm2'          | 21.73 | 16.51 | 14.5 | 5.31 | 6.13 | 11.18 | 4.14 | 14.06 | 33.04 | 14     |
| 216543 | 'Cep68'         | 2.23  | 3.6   | 1.83 | 0    | 2.59 | 1.43  | 1.82 | 5.46  | 2.04  | 1.16   |
| 216549 | 'Aftph'         | 8.98  | 10.35 | 6.06 | 1.93 | 5.04 | 6.04  | 3.05 | 3.92  | 11.19 | 7.78   |
| 216551 | 'Lgalsl'        | 15.7  | 20.18 | 11.8 | 9.87 | 9.76 | 2.57  | 13.5 | 16.3  | 10.97 | 16.99  |
| 216558 | 'Ugp2'          | 16.7  | 10.03 | 14   | 19.5 | 29.9 | 16.11 | 12.8 | 16.22 | 25.78 | 17.03  |
| 216560 | 'Wdpcp'         | 0.02  | 7.21  | 1.37 | 1.94 | 5.74 | 14.19 | 0.02 | 3.88  | 1.28  | 16.8   |
| 216565 | 'Ehbp1'         | 3.61  | 3.21  | 3.83 | 10   | 5.96 | 6.17  | 2.86 | 2.97  | 6.06  | 3.38   |
| 216578 | 'Papolg'        | 0.65  | 4.81  | 6.28 | 5.53 | 3.59 | 2.1   | 2.36 | 12.48 | 7.37  | 4.91   |
| 216613 | 'Ccdc85a'       | 16.24 | 16.06 | 21.1 | 8.83 | 5.85 | 0.99  | 8.04 | 7.53  | 6.94  | 7.23   |
| 216616 | 'Efemp1'        | 0     | 3.35  | 0    | 9.32 | 0    | 0     | 0    | 2.13  | 0     | 1.16   |
| 216618 | 'Cfap36'        | 80.17 | 86.1  | 101  | 104  | 115  | 94.31 | 96.8 | 88.51 | 78.94 | 88.88  |
| 216622 | '4931440F15Rik' | 0     | 4.82  | 0.01 | 5.14 | 0.01 | 0     | 3.01 | 0     | 1.72  | 5.32   |
| 216635 | 'Hbq1a'         | 2.48  | 2.58  | 2.76 | 0    | 12.3 | 24.08 | 17   | 11.22 | 13.87 | 5.56   |
| 21664  | 'Phlda1'        | 20.01 | 15.98 | 10   | 8.83 | 8.97 | 8.62  | 41.1 | 15.16 | 7.77  | 1.49   |

|        |            |       |       |      |      |      |       |      |       |       |        |
|--------|------------|-------|-------|------|------|------|-------|------|-------|-------|--------|
| 21665  | 'Tdg'      | 11.72 | 13.7  | 8.79 | 9.59 | 9.51 | 6.65  | 18.1 | 11.18 | 7.24  | 4.74   |
| 21667  | 'Tdgf1'    | 0     | 0     | 0    | 0.09 | 0    | 0     | 0    | 0     | 0     | 0      |
| 216705 | 'Clint1'   | 6.04  | 5.11  | 4.2  | 10.8 | 2.56 | 0.54  | 3.56 | 0.52  | 4.12  | 6.05   |
| 21672  | 'Prdx2'    | 403.2 | 370   | 335  | 389  | 460  | 537.4 | 230  | 402.5 | 292   | 341.9  |
| 216724 | 'Rufy1'    | 15.59 | 15.49 | 9.94 | 14.2 | 12   | 4.57  | 1.52 | 16.47 | 5.94  | 18.96  |
| 216725 | 'Adamts2'  | 0.43  | 1.57  | 1.28 | 0.04 | 0.06 | 0.15  | 4.72 | 0.02  | 4.03  | 1.17   |
| 216739 | 'Acsl6'    | 30.95 | 28.87 | 31.6 | 30.9 | 14.2 | 23.41 | 15.8 | 19.78 | 30.57 | 9.04   |
| 216742 | 'Fnip1'    | 0.73  | 4.13  | 2.13 | 4.55 | 2.63 | 0.23  | 2.72 | 1.61  | 4.4   | 2.26   |
| 216749 | 'Nmur2'    | 1.12  | 0     | 0.01 | 0    | 0    | 1.22  | 0    | 0     | 6.28  | 0      |
| 21676  | 'Tead1'    | 1.36  | 1.51  | 0.3  | 2.99 | 0.01 | 0.31  | 0.35 | 0.22  | 1.2   | 3.36   |
| 216760 | 'Mfap3'    | 8.13  | 9.66  | 1.78 | 7.38 | 8.67 | 8.81  | 7.32 | 8.07  | 11.78 | 11.05  |
| 216766 | 'Gemin5'   | 3.42  | 1.86  | 7.54 | 13.1 | 1.17 | 1.01  | 5.32 | 1.77  | 0.17  | 4.03   |
| 216767 | 'Mrpl22'   | 78.89 | 57.22 | 33.5 | 27.8 | 55.4 | 92.44 | 93.7 | 81.67 | 55.8  | 80.22  |
| 21677  | 'Tead2'    | 0.59  | 0     | 0    | 0    | 0    | 0     | 0    | 0     | 0     | 0      |
| 21678  | 'Tead3'    | 0.04  | 0     | 0    | 0    | 0.52 | 0.57  | 1.32 | 0     | 0     | 0.26   |
| 216781 | 'Trim58'   | 0     | 1.49  | 0.02 | 0    | 0    | 0     | 0    | 0     | 0     | 0.02   |
| 21679  | 'Tead4'    | 0     | 0     | 0    | 0    | 0    | 0     | 0    | 0     | 0.01  | 0.01   |
| 216792 | 'Iba57'    | 1.79  | 5.55  | 0    | 0    | 1.04 | 2.35  | 0    | 1.08  | 3.38  | 0      |
| 216797 | 'Prss38'   | 0     | 0     | 0    | 0.03 | 0    | 0     | 0    | 0     | 0     | 0      |
| 216799 | 'Nlrp3'    | 0     | 0.28  | 0    | 0    | 0    | 0.06  | 0    | 0     | 0     | 0      |
| 216805 | 'Flncl'    | 24.23 | 19.7  | 19   | 2.15 | 23.7 | 13.41 | 31.9 | 24.3  | 32.54 | 41.24  |
| 21681  | 'Alyref'   | 0.8   | 3.31  | 0.09 | 5.24 | 3.35 | 0.17  | 0.41 | 2.08  | 1.02  | 1.82   |
| 216810 | 'Tom1l2'   | 29.26 | 21.32 | 48   | 12.9 | 34.4 | 11.38 | 42.4 | 27.55 | 48.58 | 20.35  |
| 21682  | 'Tec'      | 0     | 0     | 0    | 0    | 0.04 | 0     | 0    | 0     | 0     | 0      |
| 216820 | 'Dhrs7b'   | 18.35 | 46.87 | 18   | 26   | 23.8 | 15.66 | 30.6 | 35.56 | 37.52 | 32.5   |
| 216821 | 'Tmem11'   | 52.43 | 53.8  | 83.7 | 67.2 | 56.7 | 67.47 | 39   | 69.22 | 45.31 | 36.43  |
| 216825 | 'Usp22'    | 97.8  | 124.1 | 121  | 97.8 | 60.8 | 33.25 | 139  | 113   | 98.67 | 103.72 |
| 216829 | 'Mmgt2'    | 18.19 | 4.27  | 5.22 | 10.2 | 18.2 | 26.75 | 0.04 | 2.77  | 34.75 | 25.45  |
| 21683  | 'Tecta'    | 0     | 0     | 0.06 | 0.11 | 0    | 0     | 1.45 | 0     | 0     | 0      |
| 216831 | 'Arhgap44' | 19.1  | 22.52 | 24.5 | 22   | 21.3 | 26.2  | 22.3 | 27.68 | 22.2  | 22.78  |
| 216835 | 'Usp43'    | 0     | 0     | 0    | 0    | 0    | 0     | 0    | 0.1   | 0     | 0      |
| 216846 | 'Cntrob'   | 0     | 8.15  | 4.02 | 1.46 | 2.62 | 2.46  | 3.87 | 0.18  | 7.41  | 1.15   |
| 216848 | 'Chd3'     | 9.94  | 9.59  | 10.4 | 16.4 | 12.8 | 11.71 | 16.3 | 10.47 | 6.63  | 9.8    |
| 21685  | 'Tef'      | 18.74 | 13.1  | 12.8 | 34.6 | 19.6 | 7.07  | 15.9 | 18.47 | 9.7   | 18.33  |
| 216850 | 'Kdm6b'    | 3.79  | 5.23  | 3.86 | 19.3 | 4.54 | 1.78  | 4.2  | 3.22  | 3.36  | 5.28   |
| 216853 | 'Wrap53'   | 2.67  | 4.17  | 6.39 | 1.98 | 8.51 | 13.76 | 10.4 | 5.83  | 2.86  | 4.84   |
| 216856 | 'Nlgn2'    | 12.3  | 9.51  | 16.3 | 18.1 | 16.3 | 6.37  | 9.11 | 9.26  | 6.83  | 4.6    |
| 216858 | 'Kctd11'   | 0     | 0     | 1.3  | 0    | 3.99 | 0.07  | 0.02 | 0     | 0     | 0.22   |
| 216860 | 'Neurl4'   | 1.38  | 2.05  | 11.2 | 2.19 | 9.87 | 5.47  | 4.83 | 5.73  | 2.42  | 4.15   |
| 216864 | 'Mgl2'     | 0.03  | 2.49  | 0    | 0    | 0.03 | 0.03  | 0    | 0     | 0     | 0      |
| 216867 | 'Slc16a11' | 6.78  | 10.86 | 15.9 | 2.39 | 30.9 | 15.06 | 24.3 | 18.5  | 16.31 | 5.53   |
| 216869 | 'Arrb2'    | 12.12 | 14.47 | 14.5 | 22.3 | 21.2 | 23.03 | 19.5 | 12.69 | 35.57 | 8.77   |
| 216871 | 'Gltpd2'   | 0     | 0     | 0    | 0    | 0    | 0     | 0    | 0     | 0     | 0.65   |
| 216873 | 'Spag7'    | 164   | 122.7 | 139  | 241  | 268  | 244.8 | 179  | 164.1 | 150.1 | 190.66 |
| 216874 | 'Camta2'   | 12.39 | 11.66 | 19.6 | 17   | 13.9 | 6.7   | 32.2 | 13.09 | 9.91  | 12.11  |
| 216877 | 'Dhx33'    | 2.01  | 4.82  | 2.11 | 4.66 | 5.03 | 0.25  | 5.47 | 0     | 2.97  | 0.05   |
| 216881 | 'Wscd1'    | 35.07 | 56.73 | 72.7 | 21.1 | 23.3 | 25.16 | 10.2 | 24.05 | 38.63 | 8.76   |
| 21689  | 'Tek11'    | 13.09 | 45.29 | 0    | 67.7 | 5.69 | 0.48  | 8.64 | 14.38 | 3.56  | 13.42  |
| 216892 | 'Spns2'    | 4.39  | 2.12  | 1.44 | 0    | 13.3 | 2.22  | 4.71 | 3.54  | 6.03  | 3.64   |
| 216961 | 'Coro6'    | 9.9   | 1.79  | 32.3 | 0    | 18.5 | 2.18  | 0.38 | 23.56 | 3.87  | 0.52   |
| 216963 | 'Git1'     | 5.45  | 9.27  | 7.75 | 26.1 | 19.7 | 11.05 | 7.47 | 14.21 | 7.37  | 11.83  |
| 216964 | 'Trp53i13' | 25.72 | 12.82 | 7.5  | 26.4 | 14.7 | 28.2  | 27.4 | 25.77 | 21.47 | 14.22  |
| 216965 | 'Taok1'    | 7.76  | 15.2  | 6.13 | 4.07 | 11.7 | 9.03  | 4.19 | 5.03  | 7.2   | 8.13   |
| 216971 | 'Fam222b'  | 11.85 | 8.53  | 8.28 | 14.8 | 10.2 | 9.06  | 14.3 | 9.67  | 10.03 | 9.53   |
| 216974 | 'Proca1'   | 3.82  | 3.82  | 2.57 | 2.4  | 2.91 | 12.05 | 9.31 | 1.69  | 3.24  | 2.12   |
| 216976 | 'BC030499' | 9.34  | 4.67  | 3.46 | 1.49 | 5.12 | 13.02 | 0.08 | 1.86  | 0     | 4.44   |
| 216984 | 'Evi2b'    | 0     | 0.01  | 0.03 | 0.02 | 0.17 | 1.11  | 0.66 | 0     | 0.01  | 1.31   |
| 216987 | 'Utp6'     | 8.98  | 13.69 | 3.82 | 4.69 | 2.27 | 4.52  | 3.48 | 4.93  | 12.16 | 6.1    |

|        |            |       |       |      |      |      |       |      |       |       |        |
|--------|------------|-------|-------|------|------|------|-------|------|-------|-------|--------|
| 216991 | 'Adap2'    | 1.54  | 0     | 0    | 0    | 0    | 2.17  | 5.87 | 0.03  | 0     | 0      |
| 217011 | 'Nle1'     | 1.73  | 3.06  | 1.31 | 3.32 | 16.6 | 8.48  | 27.2 | 6.24  | 5.08  | 17.09  |
| 217012 | 'Unc45b'   | 0     | 0.03  | 0.08 | 0.02 | 0.01 | 0     | 0    | 0     | 0.02  | 0.01   |
| 217026 | 'Heatr6'   | 3.47  | 5.41  | 6.63 | 8.5  | 3.42 | 9.26  | 11.5 | 8.45  | 2.85  | 3.66   |
| 217030 | 'Synrg'    | 5.15  | 4.78  | 2.45 | 9.19 | 3.28 | 3.64  | 4.77 | 2.43  | 3.88  | 3.84   |
| 217031 | 'Tada2a'   | 12.54 | 10.1  | 22   | 11.5 | 20.2 | 23.49 | 12.5 | 24.72 | 24.14 | 29.12  |
| 217038 | 'Mrm1'     | 10.15 | 10.98 | 8.87 | 5.81 | 5.16 | 10.52 | 16.1 | 15    | 15.91 | 6.14   |
| 217039 | 'Ggnbp2'   | 46.43 | 42.99 | 46   | 57.6 | 40.4 | 34.98 | 45.5 | 38.57 | 51.01 | 18.49  |
| 217057 | 'Pthr2'    | 14.44 | 11.06 | 11   | 7.79 | 16.5 | 18.12 | 6.54 | 10.19 | 21.24 | 17.36  |
| 217069 | 'Trim25'   | 0.24  | 0.96  | 0.37 | 1.38 | 0.21 | 0     | 0.04 | 0     | 0     | 1.08   |
| 217082 | 'Hlf'      | 5.79  | 5.7   | 4.26 | 4.89 | 3.37 | 4.71  | 0.45 | 5.16  | 2.63  | 1.83   |
| 217109 | 'Utp18'    | 6.56  | 4.79  | 3.64 | 8.75 | 5.17 | 3.66  | 3.77 | 2.72  | 3.54  | 5.8    |
| 217119 | 'Xylt2'    | 5.14  | 0     | 0.74 | 15.7 | 5.66 | 1.7   | 0    | 1.63  | 9.4   | 5.93   |
| 217124 | 'Ppp1r9b'  | 4.61  | 4.16  | 6.74 | 7.17 | 5.18 | 5.21  | 8.5  | 2.55  | 7.93  | 5.34   |
| 217125 | 'Samd14'   | 14.61 | 10.8  | 16.2 | 10.2 | 27.2 | 28.3  | 33.8 | 20.16 | 14.26 | 23.72  |
| 217127 | 'Kat7'     | 42.86 | 54.38 | 49   | 32.8 | 14.6 | 24.89 | 53.4 | 32.54 | 55.9  | 78.66  |
| 217140 | 'Scrn2'    | 0     | 7.98  | 2.82 | 0    | 10.2 | 25.89 | 4.73 | 23.03 | 9.85  | 4.78   |
| 217143 | 'Gpr179'   | 0     | 0     | 0    | 4.9  | 0    | 0     | 0    | 0     | 0     | 0      |
| 217149 | 'Cisd3'    | 95.72 | 70.66 | 79.5 | 166  | 114  | 135   | 65.7 | 101.8 | 62.15 | 85.5   |
| 217151 | 'Arl5c'    | 0     | 0     | 0    | 3.32 | 0    | 0     | 0    | 0     | 0     | 0      |
| 217154 | 'Stac2'    | 1.49  | 0     | 1.17 | 0.17 | 0    | 0     | 1.56 | 2.46  | 4.39  | 0.29   |
| 217166 | 'Nr1d1'    | 19.21 | 55.89 | 28.9 | 99.7 | 13.2 | 13.88 | 14.5 | 15.82 | 11.4  | 26.44  |
| 217169 | 'Tns4'     | 0     | 0.01  | 0.02 | 0.02 | 0.01 | 0.01  | 0    | 0     | 0.02  | 0      |
| 217194 | 'Klhl11'   | 2.63  | 5.07  | 2.83 | 0    | 2.38 | 7.08  | 12.6 | 4.33  | 3.52  | 6.31   |
| 217198 | 'Plekhh3'  | 0     | 1.06  | 2.05 | 0.98 | 1.17 | 1.92  | 1.27 | 0.72  | 0     | 0.34   |
| 217201 | 'Rundc1'   | 11.28 | 20.35 | 17.3 | 12   | 2.83 | 8.42  | 8.62 | 10.93 | 22.83 | 13.1   |
| 217203 | 'Tmem106a' | 9.67  | 0     | 4.75 | 6.17 | 2.4  | 0.02  | 0    | 4.27  | 3.68  | 9.79   |
| 217207 | 'Dhx8'     | 2.85  | 3.74  | 12.3 | 0.49 | 3.6  | 6.85  | 0.56 | 8.1   | 9.57  | 1.43   |
| 217214 | 'Nags'     | 0     | 0     | 0    | 2.34 | 0    | 0     | 0    | 0     | 0     | 0      |
| 217216 | 'BC030867' | 0     | 0     | 3.6  | 0    | 0    | 0     | 0    | 0     | 0     | 0      |
| 217217 | 'Asb16'    | 0.13  | 0     | 0    | 0    | 0    | 0     | 0    | 0     | 0     | 0.22   |
| 217218 | 'Atxn7l3'  | 2.61  | 2.72  | 3.95 | 0    | 5.77 | 4.5   | 5.22 | 2.17  | 3.15  | 1.16   |
| 217219 | 'Fam171a2' | 0     | 0.14  | 0.38 | 1.11 | 0.96 | 0.41  | 0.18 | 1.6   | 0.4   | 0.04   |
| 217232 | 'Cdc27'    | 7.52  | 7.98  | 4.65 | 23.1 | 3.7  | 10.16 | 8.89 | 4.7   | 4.98  | 2.03   |
| 217246 | 'Ace3'     | 0     | 0.02  | 0    | 0    | 0    | 0     | 0    | 0     | 0     | 0      |
| 217262 | 'Abca9'    | 0.84  | 0     | 0    | 0    | 0    | 0     | 0    | 0     | 0     | 0      |
| 217265 | 'Abca5'    | 3.35  | 1.16  | 2.36 | 1.72 | 2.36 | 0.27  | 5.59 | 0.18  | 1.35  | 2.74   |
| 217303 | 'Cd300a'   | 0.21  | 2.2   | 2.61 | 1.68 | 0.58 | 0.57  | 0.36 | 3.33  | 1.71  | 0.37   |
| 217304 | 'Cd300lb'  | 0     | 0     | 0    | 0    | 0    | 0     | 0    | 0     | 0     | 2.4    |
| 217310 | 'Hid1'     | 56.66 | 60.79 | 56.2 | 44.5 | 55.6 | 61.3  | 65.9 | 62.22 | 83.06 | 70.21  |
| 217325 | 'Lgl2'     | 0     | 0     | 0    | 0    | 1.39 | 0.01  | 0    | 0     | 0     | 0      |
| 217331 | 'Unk'      | 7.83  | 11.92 | 7.6  | 4.1  | 4.03 | 7.34  | 11.3 | 9.95  | 7.02  | 14.31  |
| 217333 | 'Trim47'   | 0     | 0     | 0    | 4.1  | 1.48 | 0     | 0    | 0     | 0     | 0      |
| 217335 | 'Fbf1'     | 3.06  | 6.6   | 9.47 | 9.43 | 4.19 | 6.75  | 8.86 | 8.7   | 12.1  | 5.5    |
| 217337 | 'Srp68'    | 54.2  | 59.07 | 50.5 | 64   | 73.4 | 75.19 | 71.4 | 51.79 | 84.64 | 51.24  |
| 217340 | 'Rnf157'   | 9.26  | 4.25  | 2.38 | 0.98 | 11.1 | 8.83  | 14.8 | 4.2   | 1.41  | 3.91   |
| 217341 | 'Qrich2'   | 0     | 0     | 0    | 0    | 0.09 | 0     | 0    | 0     | 0     | 0      |
| 217342 | 'Ube2o'    | 8.02  | 7.63  | 12.4 | 7.23 | 19.1 | 8.18  | 5.32 | 11.55 | 5.3   | 6.8    |
| 217344 | 'Rhbf2'    | 0     | 0     | 0    | 0    | 0.29 | 0     | 0    | 0.58  | 0     | 0      |
| 217351 | 'Tnrc6c'   | 7.11  | 6.3   | 6.11 | 6.03 | 8.81 | 5.49  | 5.23 | 4.87  | 7.28  | 7.07   |
| 217353 | 'Tmc6'     | 0.16  | 0.07  | 0    | 0    | 1.33 | 0     | 0    | 0     | 0     | 0.5    |
| 217356 | 'Tmc8'     | 0     | 0     | 0    | 1.25 | 0    | 0     | 1.09 | 0     | 0.08  | 0      |
| 217364 | 'Engase'   | 2.08  | 1.8   | 2.16 | 4.49 | 0.72 | 0.45  | 0    | 0     | 0     | 1.65   |
| 217365 | 'Nploc4'   | 1.97  | 1.54  | 3.36 | 1.22 | 3.22 | 3.21  | 3.73 | 3.59  | 7.57  | 1.95   |
| 217366 | 'Lrrc45'   | 43.78 | 45.68 | 71.2 | 62.2 | 59.7 | 87.94 | 52.2 | 61.97 | 54.6  | 65.95  |
| 217369 | 'Uts2r'    | 40.2  | 77.2  | 11.5 |      | 59.3 | 216.1 | 195  | 134.2 | 168.3 | 153.83 |
| 217370 | 'Cybc1'    | 22.32 | 22.03 | 26.5 | 8.1  | 19.3 | 25.12 | 5.46 | 24.54 | 18.9  | 12.67  |
| 217371 | 'Rab40b'   | 7.92  | 23.87 | 2.54 | 24.9 | 10.2 | 6.24  | 6.84 | 7.32  | 6.44  | 8.19   |



|        |            |       |       |      |      |      |       |      |       |       |        |
|--------|------------|-------|-------|------|------|------|-------|------|-------|-------|--------|
| 217378 | 'Dnajc27'  | 19.07 | 17.56 | 43.4 | 18.5 | 23.3 | 11.82 | 26.2 | 28.29 | 18.08 | 22.9   |
| 217379 | 'Ubxn2a'   | 17.56 | 14.58 | 23.1 | 10.7 | 12.6 | 14.65 | 19.5 | 14.23 | 12.61 | 7.79   |
| 217410 | 'Trib2'    | 0.96  | 13.14 | 5.89 | 6.82 | 4.4  | 3.84  | 17.4 | 9.39  | 2.56  | 3.89   |
| 217430 | 'Pqlc3'    | 0     | 2.38  | 0.85 | 0    | 0    | 0     | 0    | 0.53  | 1.58  | 0.55   |
| 217431 | 'Nol10'    | 9.73  | 13.12 | 12.7 | 13.8 | 21   | 10.31 | 18.1 | 14.94 | 21.19 | 11.1   |
| 217449 | 'Trappc12' | 29.36 | 34.55 | 35.5 | 8.63 | 27.3 | 15.69 | 31.2 | 29.41 | 14.52 | 24.54  |
| 21745  | 'Tep1'     | 0.12  | 0.03  | 0.05 | 0.02 | 0.33 | 0.91  | 0.1  | 0.06  | 0.11  | 0.11   |
| 217463 | 'Snx13'    | 11.29 | 6.31  | 12.7 | 4.11 | 10   | 6.83  | 2.43 | 6.8   | 13.32 | 10.14  |
| 217473 | 'Ankmy2'   | 30.07 | 24.09 | 25.2 | 20.2 | 26.7 | 33.04 | 17.9 | 24.67 | 30.97 | 15.82  |
| 217480 | 'Dgkb'     | 14.99 | 22.67 | 13   | 38.5 | 4.88 | 11.04 | 9.22 | 14.69 | 7.8   | 8.89   |
| 21749  | 'Terf1'    | 8.8   | 12.4  | 10.5 | 11.4 | 17   | 5.66  | 8.01 | 11.45 | 24.71 | 15.69  |
| 21750  | 'Terf2'    | 11.57 | 6.18  | 6.58 | 4.43 | 5    | 7.31  | 4.91 | 2.58  | 11.25 | 3.71   |
| 217517 | 'Stxbp6'   | 0.96  | 1.41  | 0    | 0.97 | 8.25 | 2.16  | 11.5 | 7.4   | 0.68  | 0.02   |
| 21752  | 'Tert'     | 0.73  | 1.57  | 1.38 | 0.85 | 0.42 | 0.49  | 2.3  | 1.59  | 1.65  | 2.02   |
| 21753  | 'Tes'      | 0     | 1.68  | 0.33 | 0    | 3.67 | 0.56  | 0    | 1.91  | 3.07  | 0.54   |
| 21754  | 'Tesk1'    | 5.05  | 6.17  | 6.87 | 15.1 | 6.78 | 1.92  | 7    | 3.41  | 3.78  | 9.12   |
| 217558 | 'G2e3'     | 1.2   | 0.62  | 0.55 | 0.02 | 0.05 | 0     | 1.78 | 1.25  | 0.88  | 0.99   |
| 217578 | 'Baz1a'    | 0     | 0     | 0    | 0    | 0    | 0.01  | 0    | 0     | 0     | 0      |
| 217588 | 'Mbip'     | 11.82 | 12.53 | 19.1 | 16.5 | 25   | 27.36 | 16.1 | 12.18 | 21.21 | 17.73  |
| 21761  | 'Morf4l1'  | 281.5 | 290.5 | 318  | 449  | 316  | 346.5 | 254  | 420.3 | 452.9 | 359.18 |
| 217615 | '217615'   | 4.32  | 0.94  | 5.66 | 3.77 | 4.11 | 2.43  | 5.54 | 2.19  | 9.49  | 1.85   |
| 21762  | 'Psm2'     | 131.8 | 95.7  | 124  | 181  | 87.6 | 123.3 | 97.3 | 117.8 | 110   | 138.51 |
| 21763  | 'Tex2'     | 20    | 8.65  | 7.61 | 4.73 | 8.48 | 3.9   | 11.8 | 10.85 | 10.22 | 10.62  |
| 21766  | 'Tex261'   | 24.37 | 25.12 | 23.4 | 25.2 | 52.8 | 38.62 | 44.1 | 37.08 | 26.55 | 21.71  |
| 217664 | 'Mgat2'    | 11.89 | 8.72  | 3.69 | 32.1 | 8.59 | 11    | 3.21 | 11.87 | 7.65  | 10.12  |
| 217666 | 'L2hgdh'   | 10.76 | 5.28  | 6.37 | 18.5 | 8.17 | 4.01  | 13.7 | 13.21 | 15.89 | 10.71  |
| 21767  | 'Tex264'   | 44.55 | 56.54 | 56   | 26.7 | 68.2 | 31.82 | 81.7 | 59.82 | 37.15 | 38.48  |
| 217682 | 'Plekhd1'  | 0     | 0.46  | 0    | 0    | 1.88 | 1.02  | 0    | 0     | 0     | 0.8    |
| 217684 | 'Susd6'    | 1.73  | 0.24  | 0.5  | 3.75 | 1.58 | 0.01  | 3.5  | 0     | 0.01  | 0      |
| 21769  | 'Zfand3'   | 2.77  | 12.96 | 13.6 | 6.96 | 11.5 | 1.44  | 14.1 | 4.49  | 7.45  | 11.31  |
| 217692 | 'Sipa1l1'  | 5.53  | 6.07  | 7.09 | 1.71 | 4.19 | 5.92  | 2.63 | 4.05  | 4.29  | 7.84   |
| 217695 | 'Zfyve1'   | 9.51  | 13.98 | 10.8 | 10.7 | 8.9  | 3.77  | 2.64 | 20.91 | 3.36  | 12.36  |
| 217698 | 'Acot5'    | 0     | 0     | 2.25 | 0    | 2.39 | 0     | 0    | 0     | 0     | 0      |
| 21770  | 'Ppp2r5d'  | 17.36 | 20.78 | 32.7 | 34.3 | 28   | 6.23  | 30.1 | 39.57 | 39.45 | 13.71  |
| 217700 | 'Acot6'    | 0.32  | 0.56  | 0.8  | 0    | 0    | 0     | 0    | 0     | 2.86  | 0.92   |
| 217705 | 'Fam161b'  | 2.59  | 10.29 | 9.14 | 9.52 | 8.3  | 2.45  | 12.3 | 6.35  | 2.48  | 2.71   |
| 217707 | 'Coq6'     | 28.52 | 30.32 | 36.5 | 53.6 | 37.7 | 60.41 | 21.5 | 37.72 | 16.37 | 56.58  |
| 217708 | 'Lin52'    | 46.36 | 35.68 | 24.2 | 24.4 | 35   | 42.77 | 25.7 | 48.77 | 49.66 | 47.06  |
| 21771  | 'Utp4'     | 16.22 | 30.36 | 19.4 | 5.46 | 15.5 | 15.47 | 26.4 | 25.78 | 33.93 | 27.56  |
| 217715 | 'Eif2b2'   | 36.57 | 54.64 | 47.7 | 62.4 | 49   | 51.25 | 26.5 | 44.86 | 40.39 | 46.56  |
| 217716 | 'Mlh3'     | 4.83  | 2.96  | 1.87 | 1.93 | 5.33 | 3.46  | 1.55 | 3.17  | 0.71  | 7.03   |
| 217718 | 'Nek9'     | 1.86  | 2.25  | 5.23 | 7.61 | 8.35 | 0.73  | 6.84 | 1.41  | 1.16  | 0.83   |
| 217732 | 'Cipc'     | 12.96 | 15.52 | 20.5 | 12.2 | 10.6 | 7.51  | 4.96 | 11.38 | 4.04  | 12.27  |
| 217733 | 'Tmem63c'  | 15.5  | 8.88  | 10.6 | 0.02 | 0.98 | 8.5   | 8.57 | 12.73 | 6.13  | 12.12  |
| 217734 | 'Pomt2'    | 6.64  | 2.79  | 7.64 | 0.01 | 10.2 | 1.24  | 9.8  | 4.79  | 3.33  | 5.77   |
| 217737 | 'Ahsa1'    | 212.5 | 235.6 | 134  | 134  | 140  | 131.6 | 109  | 155.6 | 180.2 | 200.72 |
| 217738 | 'Ism2'     | 0     | 0.97  | 0    | 0.12 | 0    | 0     | 0    | 0     | 0     | 0      |
| 217779 | 'Lysmd1'   | 7.23  | 11.28 | 22.1 | 0    | 16.7 | 12.15 | 13.6 | 8.21  | 2.67  | 16.36  |
| 21778  | 'Tex9'     | 10.74 | 7.31  | 5.96 | 14.5 | 8.24 | 8.5   | 4.44 | 6.11  | 2.92  | 11.43  |
| 21780  | 'Tfam'     | 14.71 | 9.99  | 15.6 | 15.2 | 12.2 | 10.65 | 8.66 | 9.94  | 7.72  | 12.43  |
| 21781  | 'Tfdp1'    | 8.99  | 16.68 | 8.72 | 5.87 | 24.4 | 10.99 | 9.79 | 12.79 | 5.41  | 8.51   |
| 217826 | 'Kcnk13'   | 1.67  | 0.33  | 0.58 | 11.3 | 0.08 | 4.1   | 2.59 | 0     | 6.59  | 3.03   |
| 217827 | 'Nrde2'    | 2.59  | 7.31  | 10.9 | 3.31 | 1.53 | 2.92  | 8.79 | 3.68  | 0.82  | 8.35   |
| 217830 | 'Dglucy'   | 12.08 | 11.56 | 3.9  | 0.02 | 9.08 | 7.63  | 4.8  | 4.56  | 0     | 7.79   |
| 217837 | 'Itpk1'    | 18.31 | 25.46 | 15.1 | 0.02 | 17.9 | 15.53 | 8.95 | 2.89  | 14.96 | 20.12  |
| 217843 | 'Unc79'    | 3.75  | 1.36  | 1.53 | 5.01 | 2.82 | 0.62  | 5.02 | 1.63  | 3.14  | 1.04   |
| 217845 | 'Ifi27l2b' | 0.04  | 0.3   | 0    | 0.05 | 0    | 0     | 0    | 0     | 0     | 0.08   |
| 21785  | 'Tff2'     | 0     | 0     | 0    | 0    | 0    | 0.27  | 0    | 0     | 0     | 0      |

|        |            |       |       |      |      |      |       |      |       |       |        |
|--------|------------|-------|-------|------|------|------|-------|------|-------|-------|--------|
| 217864 | 'Rcor1'    | 0.83  | 1.17  | 1.45 | 0.46 | 0.91 | 0     | 2.19 | 0.02  | 2.79  | 0.47   |
| 217866 | 'Cdc42bpb' | 6.58  | 2.95  | 4.15 | 3.41 | 6.4  | 4.51  | 1.72 | 3.23  | 1.79  | 9.73   |
| 217869 | 'Eif5'     | 81.83 | 71.13 | 63.7 | 102  | 80.9 | 78.34 | 88.4 | 105   | 100.5 | 88.89  |
| 21787  | 'Tfg'      | 86.45 | 112.8 | 101  | 60.2 | 55.3 | 93.52 | 75   | 70.96 | 85.8  | 107.7  |
| 21788  | 'Tfpi'     | 0.01  | 0     | 0.02 | 0    | 0    | 0     | 0.04 | 0     | 0     | 0      |
| 217882 | 'Cep170b'  | 5.72  | 6.93  | 3.43 | 13.5 | 13.8 | 7.68  | 12   | 1.64  | 9.91  | 8.09   |
| 217887 | 'Clba1'    | 14.1  | 19.1  | 23.2 | 19.9 | 8    | 15.26 | 13   | 10.98 | 13.97 | 7.81   |
| 21789  | 'Tfpi2'    | 0     | 0     | 0    | 0    | 0    | 0     | 0    | 0.03  | 0     | 0      |
| 217893 | 'Pacs2'    | 2.94  | 3.5   | 2.95 | 0.58 | 7.52 | 4.45  | 1.48 | 3.27  | 0.39  | 2.58   |
| 217935 | 'Wdr60'    | 8.8   | 8.86  | 4.22 | 7.13 | 6.19 | 10.51 | 7.87 | 3.07  | 12.47 | 9.94   |
| 217944 | 'Rapgef5'  | 2.28  | 3.36  | 4.42 | 1.16 | 0.92 | 1.57  | 5.23 | 4.96  | 1.54  | 3.79   |
| 217946 | 'Cdca7l'   | 1.35  | 0     | 0    | 0    | 0    | 0     | 0    | 1.27  | 0     | 0      |
| 217951 | 'Tmem196'  | 11.44 | 6.22  | 6.09 | 11   | 15.1 | 0.23  | 4.63 | 5.44  | 1.87  | 4.15   |
| 217980 | 'Larp4b'   | 8.32  | 10.28 | 12.1 | 17.9 | 13.9 | 10.38 | 10.3 | 7.98  | 11.89 | 10.64  |
| 217995 | 'Heatr1'   | 1.09  | 1.92  | 1.84 | 1.07 | 0.83 | 1.44  | 1.66 | 0.01  | 1.88  | 0.59   |
| 21802  | 'Tgfa'     | 1.85  | 3.42  | 11.9 | 0    | 1.2  | 0     | 16   | 2.24  | 0.02  | 0      |
| 21803  | 'Tgfb1'    | 0     | 0     | 0    | 0    | 0    | 0     | 0.39 | 0     | 0.1   | 0.08   |
| 218030 | 'Pou6f2'   | 0     | 6.81  | 0.02 | 0    | 0    | 0     | 0.07 | 8.77  | 0.83  | 0      |
| 218035 | 'Vps41'    | 66.6  | 83.13 | 101  | 101  | 104  | 84.01 | 122  | 110.2 | 116.4 | 114.93 |
| 218038 | 'Amph'     | 27.03 | 18.54 | 33.9 | 15   | 43.7 | 35.95 | 54.1 | 22.98 | 14.65 | 23.37  |
| 21804  | 'Tgfb1i1'  | 8.83  | 0.03  | 2.35 | 0.95 | 7.82 | 4.1   | 11.5 | 1.31  | 4.39  | 4.88   |
| 21807  | 'Tsc22d1'  | 454.9 | 440.7 | 505  | 828  | 430  | 470.6 | 673  | 613   | 360.8 | 429.45 |
| 21808  | 'Tgfb2'    | 2.09  | 3.27  | 0.75 | 0.02 | 9.64 | 2.34  | 2.76 | 3.54  | 2.62  | 1.71   |
| 21809  | 'Tgfb3'    | 2.98  | 0.62  | 0    | 0.78 | 2.83 | 6.01  | 1.55 | 3.71  | 1.44  | 0      |
| 21810  | 'Tgfb1'    | 0.02  | 0.69  | 0    | 0.02 | 0    | 5.95  | 0    | 0     | 0     | 0      |
| 218100 | 'Zfp322a'  | 6.57  | 4.81  | 2.97 | 3.35 | 6.6  | 1.91  | 6.74 | 7.92  | 4.9   | 5.89   |
| 21812  | 'Tgfbr1'   | 0.41  | 0.08  | 0.33 | 2.59 | 1.19 | 3.02  | 1.6  | 0.19  | 2.03  | 0.05   |
| 218121 | 'Mboat1'   | 0     | 0.77  | 0    | 0    | 1.66 | 4.5   | 0    | 0     | 0     | 0      |
| 21813  | 'Tgfbr2'   | 0     | 0     | 0    | 0    | 0    | 0.01  | 0    | 0     | 0.15  | 0      |
| 218138 | 'Gmds'     | 13.21 | 33.36 | 19.4 | 3.48 | 28.7 | 9.35  | 17.5 | 27.21 | 6.94  | 9.41   |
| 21814  | 'Tgfbr3'   | 1.23  | 0.33  | 2.51 | 0    | 2.08 | 0.96  | 1.54 | 0.67  | 1.92  | 0.6    |
| 21815  | 'Tgif1'    | 0     | 0     | 0    | 0    | 0    | 5.03  | 0    | 3.95  | 0     | 0      |
| 21817  | 'Tgm2'     | 0     | 0     | 1.63 | 0    | 0    | 0.44  | 0    | 0.01  | 0     | 0.01   |
| 21818  | 'Tgm3'     | 0     | 0.13  | 0    | 0    | 0    | 0.16  | 0    | 0     | 0.02  | 0      |
| 218194 | 'Phactr1'  | 18.81 | 27.83 | 16.5 | 29.9 | 25.6 | 26.23 | 16.5 | 23.4  | 9.14  | 28.55  |
| 218203 | 'Myli1'    | 3.62  | 6.26  | 2.44 | 2.7  | 0.74 | 1.85  | 6.37 | 0.7   | 0.01  | 0.06   |
| 21821  | 'Ift88'    | 3.54  | 5.48  | 7.82 | 4.1  | 9.65 | 7.72  | 14.4 | 5.71  | 9.43  | 9.05   |
| 218210 | 'Nup153'   | 0.05  | 2.03  | 0.22 | 0.56 | 0.21 | 2.69  | 2.96 | 0.68  | 0.03  | 0.98   |
| 218214 | 'Kdm1b'    | 0.06  | 1.79  | 1.42 | 0.16 | 0.68 | 0     | 1.61 | 0.37  | 1.25  | 0.09   |
| 218215 | 'Rnf144b'  | 2.29  | 0.05  | 1.98 | 1.17 | 0.77 | 0.64  | 0.05 | 2.07  | 0.17  | 0.32   |
| 21823  | 'Th'       | 52.1  | 157.9 | 4.08 | 263  | 5.95 | 0.1   | 0.2  | 0.07  | 55.1  | 0.12   |
| 218232 | 'Ptpdc1'   | 1.33  | 11.58 | 1.91 | 16.4 | 5.98 | 5.11  | 4.42 | 4.6   | 5.9   | 2.84   |
| 218236 | 'Fam120a'  | 8.14  | 11.56 | 5.92 | 11.9 | 8.47 | 2.08  | 5.67 | 7.24  | 10.18 | 11.28  |
| 21824  | 'Thbd'     | 0     | 0     | 0    | 0    | 0    | 3.82  | 0    | 0     | 0.4   | 0      |
| 21825  | 'Thbs1'    | 0     | 0.4   | 0    | 0    | 0    | 0     | 0    | 0     | 0     | 1.82   |
| 21826  | 'Thbs2'    | 0     | 1.08  | 0    | 0.02 | 0    | 0.03  | 0    | 0     | 7.74  | 5      |
| 21827  | 'Thbs3'    | 6.48  | 5.23  | 3.76 | 4.69 | 3.87 | 0.21  | 11   | 3.87  | 4.95  | 0.37   |
| 218271 | 'B4galt7'  | 25.72 | 16.73 | 22   | 16.9 | 20.8 | 7.17  | 28.1 | 20.16 | 12.79 | 16.77  |
| 21828  | 'Thbs4'    | 18.57 | 0     | 0    | 2.95 | 0    | 0     | 0    | 0     | 0     | 0      |
| 218294 | 'Cdc14b'   | 3.19  | 6.49  | 1.59 | 3.16 | 2.21 | 1.03  | 4.4  | 1.47  | 1.84  | 3.26   |
| 218304 | 'Prss47'   | 0     | 0     | 0    | 2.14 | 0    | 0     | 0    | 0     | 0     | 0      |
| 218311 | 'Zfp455'   | 1.74  | 4.31  | 2.29 | 0    | 0    | 0.02  | 0    | 0.01  | 0.19  | 0      |
| 218314 | 'Zfp595'   | 0     | 0     | 0.04 | 0    | 1.83 | 0     | 0    | 0     | 0     | 0      |
| 21832  | 'Thpo'     | 1.46  | 0     | 0    | 0.03 | 3.94 | 0     | 10.9 | 4.52  | 0.02  | 0.83   |
| 21833  | 'Thra'     | 44.02 | 30.14 | 37.7 | 79.9 | 51.7 | 27.92 | 52.9 | 31.24 | 29.37 | 27.64  |
| 218333 | 'Ice1'     | 1.08  | 1.96  | 1.52 | 3.95 | 4.42 | 4.68  | 2.99 | 1.22  | 3.67  | 1.96   |
| 218335 | 'Clptm1l'  | 19.46 | 13.69 | 9.55 | 41.2 | 20.6 | 19.49 | 18.3 | 12.77 | 14.09 | 4.76   |
| 21834  | 'Thrb'     | 5.74  | 4.65  | 5.3  | 4.93 | 3.09 | 3.86  | 8.03 | 1.52  | 1.98  | 4.85   |

|        |                 |       |       |      |      |      |       |      |       |       |        |
|--------|-----------------|-------|-------|------|------|------|-------|------|-------|-------|--------|
| 218341 | 'Rfesd'         | 4.3   | 12.78 | 10.5 | 5.83 | 13.9 | 18.37 | 9.32 | 15    | 12.43 | 9.66   |
| 218343 | 'Ttc37'         | 1.35  | 1.17  | 2.72 | 0.63 | 0.05 | 0.52  | 0.91 | 0.99  | 2.86  | 0.59   |
| 21835  | 'Thrsp'         | 15.48 | 13.68 | 0    | 0.05 | 1.7  | 40.78 | 33.5 | 4.69  | 23.61 | 40.29  |
| 21838  | 'Thy1'          | 45.19 | 30.33 | 77.4 | 78.4 | 67.1 | 35.34 | 55.8 | 71.1  | 53.21 | 17.54  |
| 218397 | 'Rasa1'         | 0.38  | 7.99  | 3.74 | 2.79 | 1.71 | 4.13  | 2.22 | 1.9   | 0.13  | 3.09   |
| 21841  | 'Tia1'          | 26.06 | 36.04 | 32.5 | 11.4 | 30.6 | 26.72 | 30.3 | 32.79 | 40.91 | 40.91  |
| 21843  | 'Tial1'         | 22.52 | 13.46 | 14.3 | 30.6 | 23.6 | 14.27 | 7.6  | 18.38 | 26.03 | 20.48  |
| 21844  | 'Tiam1'         | 3.64  | 3.74  | 5.03 | 3.12 | 2.36 | 1.51  | 3.57 | 0.9   | 1.75  | 0.71   |
| 218440 | 'Ankrd34b'      | 3.49  | 4.11  | 8.05 | 0.34 | 4    | 5.13  | 3.53 | 4.72  | 5.04  | 3.81   |
| 218441 | 'Zfyve16'       | 4.62  | 4.15  | 3.44 | 3.45 | 2.73 | 4.78  | 5.81 | 5.05  | 3.79  | 2.63   |
| 218442 | 'Serinc5'       | 4.39  | 2.77  | 10.6 | 0.19 | 0.17 | 0.24  | 6.15 | 4.41  | 0.15  | 0.09   |
| 218454 | 'Lhfp12'        | 5.32  | 1.61  | 0.6  | 0    | 4.34 | 0.7   | 0.62 | 0     | 0.01  | 4.72   |
| 218460 | 'Wdr41'         | 11.85 | 18.44 | 27.4 | 7.96 | 19   | 27.09 | 24.9 | 8.76  | 13.45 | 9.27   |
| 218461 | 'Pde8b'         | 8.18  | 9.37  | 6.46 | 5.29 | 9.67 | 14.63 | 8.44 | 11.19 | 13.41 | 17.96  |
| 21847  | 'Klf10'         | 4.22  | 1.93  | 2.37 | 11.6 | 3.81 | 0.13  | 0.02 | 2.57  | 0     | 2.28   |
| 218476 | 'Gcnt4'         | 0     | 0.09  | 0    | 0    | 0    | 0     | 0    | 0     | 0     | 0      |
| 21848  | 'Trim24'        | 0.03  | 0.12  | 1.58 | 3.27 | 0.34 | 0.05  | 3.44 | 0.7   | 0.51  | 0.61   |
| 21849  | 'Trim28'        | 19.5  | 13.6  | 30   | 42.9 | 17.5 | 11.73 | 19   | 17.63 | 25.75 | 6.87   |
| 218490 | 'Btf3'          | 165.9 | 208.5 | 254  | 158  | 158  | 201.6 | 236  | 156.6 | 148.4 | 190.72 |
| 218503 | 'Fcho2'         | 2.47  | 0.89  | 0.53 | 0.09 | 0.03 | 0.66  | 1.62 | 0.82  | 0.83  | 2.45   |
| 218506 | 'Mrps27'        | 36.13 | 24.83 | 26.7 | 14.8 | 24.5 | 27.22 | 34.4 | 30.78 | 40.9  | 43.61  |
| 218518 | 'Marveld2'      | 2.54  | 0     | 0    | 6.17 | 0    | 0     | 0    | 0.43  | 1.69  | 4.57   |
| 21853  | 'Timeless'      | 0.03  | 0.03  | 1.26 | 0.02 | 0.12 | 0.03  | 0.04 | 0.05  | 0.05  | 0.91   |
| 21854  | 'Timm17a'       | 251.7 | 228.5 | 231  | 211  | 272  | 370.6 | 217  | 268.4 | 213.5 | 267.59 |
| 218543 | 'Srek1'         | 21.95 | 28.73 | 13.7 | 24.7 | 22.2 | 24.23 | 20.8 | 22.74 | 22.78 | 22.3   |
| 218544 | 'Sgtb'          | 11.29 | 16.46 | 21.9 | 22.1 | 16.2 | 10.89 | 20.2 | 10.56 | 37.21 | 14.7   |
| 21855  | 'Timm17b'       | 34.3  | 76.4  | 52.5 | 17.5 | 57.9 | 37.13 | 26.3 | 41.74 | 51.15 | 57.83  |
| 21856  | 'Timm44'        | 27.04 | 23.42 | 49.2 | 46   | 59.6 | 44.99 | 18.9 | 40.57 | 38.12 | 40.56  |
| 21858  | 'Timp2'         | 62.25 | 47.17 | 46.5 | 55.4 | 67.1 | 51.76 | 107  | 37.1  | 65.2  | 50.77  |
| 21859  | 'Timp3'         | 12.54 | 20.47 | 12.6 | 24.2 | 3.25 | 7.54  | 40.6 | 9.6   | 21.46 | 2.18   |
| 218613 | 'Mier3'         | 3.49  | 3.01  | 3.42 | 3.68 | 1.99 | 0.5   | 2.02 | 1.25  | 1.46  | 3.34   |
| 218624 | 'Il31ra'        | 0.2   | 0.17  | 0.23 | 0.25 | 0.16 | 0.13  | 0.13 | 0.08  | 0.19  | 0.18   |
| 218629 | 'Dhx29'         | 6.46  | 4.82  | 3.66 | 4.62 | 5.54 | 5.59  | 5.32 | 6.61  | 7.02  | 9.74   |
| 218630 | 'Ccno'          | 0     | 0     | 1.6  | 0    | 0    | 0     | 0    | 0     | 0     | 0      |
| 218639 | 'Arl15'         | 8.77  | 4.02  | 4.28 | 2.81 | 10.8 | 0.67  | 6.65 | 3.44  | 2.01  | 9.25   |
| 21869  | 'Nkx2-1'        | 2.95  | 2.1   | 0.95 | 13.2 | 0.17 | 0.06  | 0    | 0.72  | 0.09  | 0.06   |
| 218693 | 'Paip1'         | 76.19 | 65.26 | 46.7 | 54   | 73   | 51.28 | 63   | 69.34 | 76.99 | 82.09  |
| 218695 | 'Gm10044'       | 0.76  | 0.75  | 0.31 | 1.41 | 0.04 | 0.01  | 0.62 | 0.47  | 0.82  | 0.45   |
| 218699 | 'Pxx'           | 21.92 | 12.62 | 24.9 | 16.3 | 19.6 | 21.01 | 4.43 | 24.7  | 23.23 | 9.3    |
| 21871  | 'Atp6v0a2'      | 6.36  | 6.51  | 16.9 | 13.8 | 3.83 | 3.22  | 8.43 | 8.5   | 15.16 | 4.62   |
| 21872  | 'Tjp1'          | 1.09  | 0.8   | 1.86 | 3.06 | 0.97 | 1.63  | 0.78 | 1.11  | 1.29  | 0.53   |
| 21873  | 'Tjp2'          | 3.29  | 1.31  | 1.52 | 6.72 | 1.21 | 1.05  | 1.18 | 0.04  | 0.28  | 0.01   |
| 218734 | '3830406C13Rik' | 13.09 | 15.62 | 10   | 18.7 | 19.3 | 10.53 | 16.7 | 19.29 | 22.07 | 15.79  |
| 218739 | 'Sntn'          | 0     | 0     | 0    | 0    | 0    | 0     | 0    | 0.63  | 0     | 0      |
| 218756 | 'Slc4a7'        | 4.88  | 1.39  | 4.23 | 5.98 | 2.44 | 0.39  | 0.3  | 5.42  | 7.71  | 4.26   |
| 218763 | 'Lrrc3b'        | 25.67 | 10.28 | 17.3 | 20.4 | 33   | 46.43 | 24.3 | 33.45 | 27.96 | 9.51   |
| 21877  | 'Tk1'           | 0     | 2.68  | 0    | 0    | 0.53 | 0     | 0    | 0.06  | 0     | 0      |
| 218772 | 'Rarb'          | 1.05  | 0.8   | 3.41 | 0    | 0.05 | 0     | 0    | 3.95  | 0     | 0      |
| 218793 | 'Ube2e2'        | 20.95 | 36.89 | 46.3 | 110  | 59.6 | 39.46 | 37.9 | 40.85 | 46.25 | 31.54  |
| 21881  | 'Tkt'           | 93.21 | 106   | 142  | 68.7 | 74.9 | 131.6 | 105  | 128.6 | 103.7 | 153.55 |
| 218811 | 'Sec24c'        | 15.9  | 12.78 | 16.7 | 0.23 | 13   | 7.89  | 17.3 | 20.2  | 7.51  | 12.35  |
| 218820 | 'Zfp503'        | 0     | 0     | 0    | 0    | 0.14 | 0     | 0    | 0     | 0     | 0      |
| 218832 | 'Polr3a'        | 8.97  | 4.69  | 6.79 | 6.85 | 8.87 | 4.74  | 3.48 | 2.04  | 6.06  | 11.21  |
| 21885  | 'Tle1'          | 0.77  | 5.39  | 3.85 | 5.1  | 6.48 | 5.49  | 0    | 0.17  | 3.1   | 9.89   |
| 218850 | 'Fam208a'       | 2.11  | 2.14  | 0.24 | 2.93 | 1.9  | 2.02  | 1.47 | 1.59  | 1.86  | 1.88   |
| 21886  | 'Tle2'          | 1.26  | 13.36 | 18.8 | 10.1 | 4.18 | 0.31  | 12   | 17.33 | 19.45 | 0.02   |
| 218865 | 'Chdh'          | 0     | 0.19  | 0.05 | 0    | 0    | 0     | 0    | 0     | 0     | 0.4    |
| 21887  | 'Tle3'          | 0.62  | 0.21  | 2.08 | 0.74 | 5.3  | 0.3   | 2.11 | 2.11  | 1.48  | 0.01   |

|        |             |       |       |      |      |      |       |      |       |       |        |
|--------|-------------|-------|-------|------|------|------|-------|------|-------|-------|--------|
| 218877 | 'Sema3g'    | 0     | 0     | 0    | 0    | 0    | 0     | 0    | 0     | 3.07  | 0      |
| 21888  | 'Tle4'      | 11.71 | 13.96 | 5.31 | 2.13 | 9.27 | 12.38 | 4.66 | 3.22  | 14.83 | 14.63  |
| 218885 | 'Oxnad1'    | 9.8   | 15.32 | 14   | 7.02 | 11.1 | 0.03  | 2.89 | 10.85 | 0     | 16.81  |
| 218914 | 'Wapl'      | 4.76  | 7.36  | 3.41 | 11.7 | 7.98 | 4.67  | 3.99 | 6.16  | 5.77  | 4.49   |
| 21892  | 'Tll1'      | 0     | 0.18  | 0    | 0    | 0    | 0     | 0    | 0     | 0     | 0      |
| 21894  | 'Tln1'      | 1.27  | 1.17  | 0.19 | 1.25 | 1.2  | 0.04  | 0.85 | 0.53  | 0.41  | 1.37   |
| 218952 | 'Fermt2'    | 6.13  | 7.49  | 9.44 | 32.6 | 4.12 | 10.64 | 10.1 | 4.22  | 12.8  | 6.4    |
| 21897  | 'Tlr1'      | 0.01  | 0     | 0    | 0.02 | 0.01 | 0.01  | 0.01 | 0     | 0     | 0      |
| 218973 | 'Wdhd1'     | 1.58  | 1.47  | 0.05 | 7.22 | 0    | 2.23  | 2.38 | 2.54  | 0.12  | 0.09   |
| 218975 | 'Mapk1ip11' | 9.87  | 8.94  | 4.28 | 17   | 8.25 | 1.76  | 14.2 | 12.69 | 10.37 | 13.71  |
| 218977 | 'Dlgap5'    | 0.03  | 0.02  | 1.27 | 0.04 | 0.92 | 0.06  | 0    | 0.01  | 0     | 0.22   |
| 218989 | 'Tmem260'   | 2.74  | 2.26  | 3.2  | 5.99 | 2.64 | 1.91  | 0.12 | 1.39  | 1.57  | 1.38   |
| 219022 | 'Ttc5'      | 32.35 | 27.32 | 23.7 | 64.4 | 65.3 | 82.8  | 53.6 | 67.44 | 35.3  | 44.2   |
| 219024 | 'Pip4p1'    | 18.55 | 21.41 | 19.5 | 56.9 | 19   | 35.89 | 18.4 | 26.58 | 62.59 | 8.11   |
| 21907  | 'Nr2e1'     | 0.5   | 0.06  | 0    | 2.61 | 0    | 3.44  | 0    | 1.29  | 0     | 2.73   |
| 219072 | 'Haus4'     | 4.36  | 10.56 | 3.06 | 5.5  | 2.6  | 1.52  | 6.92 | 3.45  | 3.83  | 3.94   |
| 219094 | 'Khynyn'    | 4.58  | 10.54 | 8.77 | 8.26 | 6.82 | 9.57  | 2.63 | 5.66  | 17.1  | 17.55  |
| 219103 | 'Cenpj'     | 0.55  | 1.57  | 0.99 | 0    | 0.97 | 0     | 0    | 0.01  | 0     | 0      |
| 219105 | 'Zmym5'     | 18.67 | 16.86 | 6.91 | 16.4 | 3.06 | 13.19 | 14.3 | 16.23 | 23.41 | 25     |
| 219114 | 'Ska3'      | 0     | 3.86  | 1.24 | 0.13 | 0    | 2.58  | 0    | 0.02  | 0     | 1.12   |
| 21912  | 'Tspan7'    | 1163  | 817.5 | 1200 | 1080 | 964  | 917.4 | 1702 | 1151  | 633.2 | 827.79 |
| 219131 | 'Phf11a'    | 0     | 0     | 0    | 0    | 0.21 | 1.05  | 0    | 0     | 0     | 0      |
| 219132 | 'Phf11d'    | 0.05  | 0.02  | 0.02 | 0    | 2.09 | 2.45  | 0.02 | 0     | 0     | 0.05   |
| 219134 | 'Shisa2'    | 0.14  | 0     | 0    | 2.52 | 0    | 0     | 1.83 | 0     | 1.89  | 0      |
| 219135 | 'Mtmr6'     | 66.86 | 57.84 | 42.8 | 39.5 | 56.3 | 19.72 | 59.1 | 63.39 | 56.12 | 80.37  |
| 219140 | 'Spata13'   | 0.01  | 1.4   | 1.7  | 1.06 | 2.09 | 1.91  | 1.14 | 0.06  | 0.01  | 2.9    |
| 219148 | 'Fam167a'   | 0     | 0.28  | 3.28 | 0.29 | 0.55 | 0     | 0    | 2     | 0.08  | 0      |
| 219149 | 'Xkr6'      | 0.83  | 1.15  | 0.28 | 0    | 3.57 | 0.59  | 9.02 | 0.44  | 0.81  | 4.4    |
| 21915  | 'Dtymk'     | 45.66 | 56.26 | 33.1 | 79.8 | 56.7 | 38.6  | 85.8 | 15.59 | 35.35 | 69.42  |
| 219150 | 'Hmbox1'    | 1.45  | 0.18  | 2.31 | 10.4 | 0.97 | 1.55  | 4.33 | 3.37  | 4.83  | 1.89   |
| 219151 | 'Scara3'    | 0.06  | 0     | 0    | 0    | 0.44 | 0     | 0    | 0     | 6.11  | 0      |
| 219158 | 'Ccar2'     | 38.73 | 21.29 | 44.9 | 7.82 | 26.9 | 10.19 | 22.4 | 32.84 | 44.56 | 29.53  |
| 21916  | 'Tmod1'     | 7.4   | 15.68 | 4.44 | 13.7 | 4.73 | 1.38  | 1.59 | 2.98  | 4.06  | 0.8    |
| 21917  | 'Tmpe'      | 3.47  | 1.88  | 2.93 | 5.64 | 0.58 | 2.6   | 4.72 | 2.31  | 4.57  | 0.74   |
| 219170 | 'Fam216b'   | 0     | 0     | 0    | 0    | 0    | 0     | 0    | 0.05  | 0     | 0      |
| 219181 | 'Akap11'    | 11.57 | 9.82  | 17.5 | 9.49 | 10.2 | 8.9   | 11.7 | 5.11  | 12.92 | 6.31   |
| 219189 | 'Vwa8'      | 4.16  | 1.75  | 8.02 | 8.63 | 2.35 | 0.06  | 0.63 | 3.02  | 2.92  | 0.25   |
| 21922  | 'Clec3b'    | 0     | 0.65  | 2.26 | 0    | 0.36 | 0     | 0    | 0     | 0     | 0      |
| 219228 | 'Pcdh17'    | 23.49 | 20.99 | 21.4 | 19   | 6.55 | 13.62 | 11.3 | 35.82 | 23.64 | 28.03  |
| 21924  | 'Tnnc1'     | 12.73 | 12.31 | 15.6 | 2.18 | 33.2 | 11.27 | 19.7 | 13.26 | 18.52 | 16.67  |
| 219249 | 'Tdrd3'     | 6.32  | 0.98  | 0.66 | 0.59 | 5.81 | 3.35  | 8.12 | 5.96  | 0.59  | 0.58   |
| 219257 | 'Pcdh20'    | 39.4  | 15.06 | 5.36 | 8.79 | 0.36 | 2.71  | 4.36 | 38.81 | 13.94 | 10.39  |
| 21926  | 'Tnf'       | 2.42  | 0     | 0    | 0    | 0    | 64.14 | 6.11 | 0     | 0     | 0      |
| 21927  | 'Tnfaip1'   | 15.14 | 19.94 | 21.1 | 25.9 | 8.23 | 32.99 | 9.04 | 24.92 | 17.6  | 22.92  |
| 21928  | 'Tnfaip2'   | 0.02  | 0     | 0    | 0    | 0.94 | 0     | 0    | 0     | 0.05  | 0      |
| 21929  | 'Tnfaip3'   | 0     | 0     | 0    | 0    | 0    | 0.6   | 0    | 1.35  | 0     | 0      |
| 21930  | 'Tnfaip6'   | 6.15  | 17.21 | 3.79 | 20.4 | 0.34 | 7.76  | 0    | 2.96  | 0.08  | 0      |
| 21933  | 'Tnfrsf10b' | 1.7   | 2.27  | 3.44 | 3.29 | 2.87 | 3.13  | 4.37 | 1.4   | 3.27  | 1.82   |
| 21934  | 'Tnfrsf11a' | 0.47  | 0.01  | 0.04 | 0.01 | 0    | 0     | 0    | 0.02  | 0.01  | 0      |
| 21935  | 'Tnfrsf17'  | 0     | 3.36  | 0    | 0    | 0    | 6.03  | 0    | 0     | 0     | 0      |
| 21936  | 'Tnfrsf18'  | 0.85  | 1.09  | 0.35 | 2.31 | 1.08 | 2.82  | 0.97 | 0.1   | 0     | 1.31   |
| 21937  | 'Tnfrsf1a'  | 3     | 0     | 3.52 | 0    | 0    | 0     | 0    | 3.03  | 0     | 2.33   |
| 21938  | 'Tnfrsf1b'  | 1.13  | 2.27  | 4.54 | 0    | 0    | 1.24  | 0    | 0.82  | 0.02  | 0      |
| 21939  | 'Cd40'      | 0     | 5.96  | 0    | 0    | 0    | 0     | 0    | 5.25  | 0     | 0      |
| 21940  | 'Cd27'      | 0     | 0     | 0    | 0    | 0    | 0     | 0    | 0.26  | 0     | 0.17   |
| 21941  | 'Tnfrsf8'   | 6.11  | 10.11 | 3.33 | 0    | 8.15 | 0     | 2.02 | 15.39 | 5.98  | 5.61   |
| 21942  | 'Tnfrsf9'   | 1.3   | 0     | 0    | 0.03 | 0    | 6.82  | 0    | 0     | 0     | 0      |
| 21944  | 'Tnfrsf12'  | 0.87  | 0     | 1.64 | 0    | 0    | 0     | 0    | 0     | 0     | 0.15   |

|       |            |       |       |      |      |      |       |      |       |       |        |
|-------|------------|-------|-------|------|------|------|-------|------|-------|-------|--------|
| 21945 | 'Dedd'     | 19.42 | 16.03 | 17.7 | 16.9 | 11   | 25.52 | 16.1 | 15.14 | 14.79 | 8.62   |
| 21946 | 'Pglyrp1'  | 0     | 0.3   | 0    | 0    | 0    | 0     | 0    | 0.44  | 0     | 2.23   |
| 21948 | 'Cd70'     | 0     | 0.78  | 3    | 0    | 1.59 | 8.94  | 7.3  | 0.9   | 11.68 | 2.19   |
| 21950 | 'Tnfsf9'   | 2.49  | 0     | 1.88 | 18.4 | 0    | 5.14  | 0    | 0     | 4.4   | 13.75  |
| 21951 | 'Tnks'     | 1.18  | 0.61  | 1.53 | 5.4  | 0.35 | 0.82  | 0.36 | 0.53  | 2.19  | 0.42   |
| 21952 | 'Tnni1'    | 0.61  | 0.23  | 0    | 0    | 2.29 | 1.12  | 0    | 0     | 0     | 0      |
| 21954 | 'Tnni3'    | 5.37  | 0.92  | 18.3 | 4.33 | 4.39 | 5.78  | 5.99 | 2     | 5.67  | 9.84   |
| 21955 | 'Tnnt1'    | 0     | 0     | 0.1  | 0    | 0    | 0     | 0    | 1.21  | 0     | 0      |
| 21956 | 'Tnnt2'    | 6.22  | 9.91  | 32.2 | 7.41 | 4.63 | 5.74  | 1.96 | 17.3  | 42.47 | 17.6   |
| 21960 | 'Tnr'      | 4.55  | 2.33  | 8.72 | 7.65 | 5.22 | 1.67  | 1.35 | 6.44  | 12.59 | 6.66   |
| 21961 | 'Tns1'     | 0.01  | 1.49  | 0.85 | 0.02 | 0.86 | 0.01  | 1.19 | 0.16  | 0.47  | 0.08   |
| 21968 | 'Tom1'     | 8.74  | 26.51 | 43.6 | 12.4 | 34.4 | 30.24 | 45   | 41.18 | 46.09 | 39.92  |
| 21969 | 'Top1'     | 16.67 | 19.74 | 12.1 | 24.1 | 16   | 9.22  | 12.3 | 10.92 | 15.29 | 12.43  |
| 21973 | 'Top2a'    | 0     | 0     | 0    | 0    | 0    | 0     | 0    | 0     | 0.02  | 0      |
| 21974 | 'Top2b'    | 4.33  | 3.94  | 1.34 | 5.74 | 2.48 | 0.04  | 4.28 | 2.94  | 5.81  | 1.74   |
| 21975 | 'Top3a'    | 1.3   | 0     | 0.41 | 0.03 | 4.58 | 2.49  | 0    | 0     | 4.76  | 10.24  |
| 21976 | 'Top3b'    | 18.92 | 22.88 | 26.2 | 16.4 | 13.9 | 24.47 | 20.7 | 16.89 | 19.81 | 20.88  |
| 21981 | 'Ppp1r13b' | 6.61  | 4.11  | 3.87 | 4.55 | 4.19 | 7.23  | 4.03 | 2.64  | 3.38  | 3.96   |
| 21982 | 'Tmem165'  | 3.31  | 1.88  | 4.23 | 0    | 6.49 | 0     | 13   | 2.74  | 1.63  | 0.88   |
| 21983 | 'Tpbg'     | 0.88  | 2.8   | 0.01 | 1.89 | 0.76 | 3.82  | 0    | 1.75  | 4.07  | 1.39   |
| 21985 | 'Tpd52'    | 32.77 | 38.37 | 24.9 | 80.8 | 45.3 | 31.27 | 13.5 | 24.78 | 51.47 | 22.5   |
| 21987 | 'Tpd5211'  | 62.27 | 58.75 | 72.3 | 98.1 | 85.2 | 141.8 | 58.1 | 79.91 | 60.99 | 91.81  |
| 21991 | 'Tpi1'     | 705.1 | 695.6 | 810  | 389  | 622  | 759.2 | 1059 | 773.1 | 542   | 549.94 |
| 22003 | 'Tpm1'     | 76.26 | 69.18 | 78.2 | 54   | 46.6 | 61.82 | 76.2 | 71.59 | 58.8  | 46.62  |
| 22004 | 'Tpm2'     | 0     | 0     | 0    | 0    | 1.31 | 0     | 0    | 0.07  | 0     | 0      |
| 22017 | 'Tpmt'     | 8.86  | 2.93  | 2.31 | 2    | 3.03 | 7.73  | 5.39 | 6.17  | 0.18  | 2.67   |
| 22018 | 'Tpo'      | 0     | 1.41  | 0.01 | 0.07 | 5.83 | 0.01  | 0    | 2.33  | 3.26  | 0.18   |
| 22019 | 'Tpp2'     | 14.71 | 5.12  | 17.5 | 2.67 | 4.86 | 5.93  | 13.8 | 12.92 | 17.16 | 12.04  |
| 22021 | 'Tpst1'    | 9.48  | 9.89  | 10.1 | 9.02 | 12.9 | 5.05  | 4.89 | 8.18  | 3.31  | 0.73   |
| 22022 | 'Tpst2'    | 23.31 | 22.3  | 2.88 | 6.51 | 10.8 | 19.6  | 26.9 | 22.79 | 30.88 | 10.07  |
| 22025 | 'Nr2c1'    | 4.75  | 0.26  | 1.9  | 0    | 2.35 | 0.03  | 0    | 2.94  | 4.75  | 4.19   |
| 22026 | 'Nr2c2'    | 2.56  | 2.42  | 2.87 | 7.09 | 4.33 | 5.02  | 0.94 | 3.9   | 2.3   | 3.89   |
| 22027 | 'Hsp90b1'  | 271.7 | 258.4 | 151  | 181  | 202  | 193.6 | 190  | 209   | 316.7 | 342.96 |
| 22029 | 'Traf1'    | 0     | 0     | 0    | 1.27 | 3.19 | 0     | 0    | 0     | 3.57  | 0      |
| 22030 | 'Traf2'    | 7.21  | 7.72  | 3.9  | 0    | 6.09 | 3.63  | 0.02 | 11.08 | 5.53  | 13.72  |
| 22031 | 'Traf3'    | 2.26  | 2.51  | 1.53 | 4.51 | 6.78 | 3.27  | 0.76 | 0.01  | 3.02  | 2.55   |
| 22032 | 'Traf4'    | 1.52  | 0.93  | 9.96 | 6.26 | 0.1  | 0.01  | 16.5 | 0.76  | 4.72  | 0      |
| 22034 | 'Traf6'    | 0.04  | 0.7   | 2.3  | 3.13 | 1.97 | 0.01  | 0.91 | 0     | 2.05  | 2.33   |
| 22035 | 'Tnfsf10'  | 0.19  | 0.42  | 0.4  | 0.39 | 0.14 | 0.34  | 0.91 | 0.16  | 1.73  | 0.44   |
| 22036 | 'Traip'    | 14.98 | 12.44 | 7.28 | 5.77 | 13.4 | 30.2  | 22.9 | 18.84 | 2.73  | 12.83  |
| 22038 | 'Plscr1'   | 1.51  | 7.54  | 0    | 21.4 | 4.65 | 4.29  | 0.03 | 7.22  | 12.34 | 7.44   |
| 22040 | 'Trex1'    | 5.54  | 13.92 | 28.1 | 52.7 | 41.1 | 45.73 | 6.24 | 23.06 | 23.42 | 8.91   |
| 22041 | 'Trf'      | 86.56 | 158   | 2.92 | 21.3 | 119  | 365.1 | 5.78 | 15.05 | 0.29  | 37.16  |
| 22042 | 'Tfrc'     | 3.94  | 3.14  | 10.1 | 9.57 | 7.61 | 3.94  | 9.59 | 12.79 | 13.43 | 1.86   |
| 22044 | 'Trh'      | 23.27 | 1782  | 5.16 | 0.38 | 4.19 | 41.18 | 910  | 4.77  | 1.26  | 240.48 |
| 22045 | 'Trhr'     | 6.12  | 14.31 | 12.2 | 0    | 9.96 | 2.96  | 5.36 | 4.57  | 7.9   | 3.87   |
| 22051 | 'Trip6'    | 0     | 0     | 1.7  | 0    | 0    | 0     | 0.06 | 2.38  | 0.17  | 3.61   |
| 22057 | 'Tob1'     | 12.34 | 18.83 | 19.6 | 23.8 | 8.03 | 2.8   | 7.14 | 6.46  | 3.33  | 7.69   |
| 22059 | 'Trp53'    | 14.11 | 19.46 | 21.3 | 32   | 12.2 | 10.37 | 25.5 | 25.9  | 23.46 | 12.94  |
| 22061 | 'Trp63'    | 0     | 0     | 0.16 | 0    | 0    | 0     | 0    | 0     | 0     | 1.22   |
| 22062 | 'Trp73'    | 0     | 0     | 0    | 0    | 0    | 0.82  | 0    | 0     | 0     | 0      |
| 22063 | 'Trpc1'    | 1.95  | 1.39  | 1.38 | 6.18 | 0.01 | 0     | 1.06 | 1.06  | 3.16  | 0.01   |
| 22065 | 'Trpc3'    | 0     | 0.03  | 0.06 | 0    | 0    | 1.17  | 0    | 1.37  | 1.19  | 0.12   |
| 22066 | 'Trpc4'    | 3.71  | 5.45  | 3.21 | 0.16 | 3.51 | 4.61  | 0.02 | 2.67  | 0     | 0      |
| 22067 | 'Trpc5'    | 2.57  | 2.84  | 6.38 | 1.57 | 5.31 | 3.23  | 7.37 | 4.15  | 9.56  | 7.35   |
| 22068 | 'Trpc6'    | 0.65  | 0.28  | 0.2  | 0.3  | 0.31 | 0.39  | 0.15 | 0.59  | 3.15  | 1.96   |
| 22070 | 'Tpt1'     | 422.6 | 386   | 324  | 285  | 348  | 492   | 350  | 328.7 | 363.2 | 364.86 |
| 22083 | 'Ctr9'     | 11.8  | 15.81 | 18.3 | 37.4 | 15.7 | 11.28 | 21   | 13.81 | 6.19  | 13.69  |

|       |          |       |       |      |       |      |       |      |       |       |         |
|-------|----------|-------|-------|------|-------|------|-------|------|-------|-------|---------|
| 22084 | 'Tsc2'   | 4.04  | 6.54  | 12.7 | 7.63  | 5.16 | 3.19  | 11.1 | 7.75  | 6.62  | 11.66   |
| 22088 | 'Tsg101' | 143   | 131.3 | 127  | 88.3  | 87.6 | 93.38 | 122  | 125   | 154.9 | 118.1   |
| 22092 | 'Rsph1'  | 25.19 | 19.14 | 0.04 | 15.9  | 75.5 | 10.3  | 12.7 | 12.64 | 18.81 | 26.18   |
| 22094 | 'Tshb'   | 6.25  | 7.05  | 9.74 | 11.8  | 11.5 | 8.42  | 7.89 | 5.45  | 9.64  | 6.48    |
| 22099 | 'Tsn'    | 69.61 | 78.32 | 74.4 | 67.1  | 77.8 | 73.64 | 51   | 83.48 | 58.85 | 64.72   |
| 22110 | 'Tspyl1' | 140.2 | 169.5 | 132  | 90.4  | 123  | 73.58 | 88.2 | 115.5 | 125.6 | 91.23   |
| 22116 | 'Tsks'   | 0.22  | 0     | 0.16 | 0     | 1.11 | 0     | 0.28 | 0     | 1.79  | 0       |
| 22117 | 'Tst'    | 9.55  | 16.61 | 13.9 | 14.3  | 9.34 | 52.44 | 23.2 | 9.51  | 5.46  | 10.56   |
| 22121 | 'Rpl13a' | 227.3 | 238   | 217  | 364   | 286  | 233.4 | 183  | 144.1 | 130.5 | 192.39  |
| 22122 | 'Tsta3'  | 40    | 44.22 | 58.2 | 38.2  | 46.1 | 56.17 | 91.8 | 42.77 | 58.11 | 60.2    |
| 22123 | 'Psmc3'  | 43.89 | 46.33 | 87.2 | 44.9  | 46.1 | 37.23 | 59.6 | 34.67 | 43.94 | 10.67   |
| 22129 | 'Ttc3'   | 212.6 | 213.4 | 250  | 188   | 185  | 140.4 | 251  | 186.5 | 263.6 | 203.4   |
| 22130 | 'Ttf1'   | 3.62  | 4.27  | 3.33 | 5.51  | 5.7  | 5.62  | 5.5  | 3.06  | 4.77  | 4.31    |
| 22134 | 'Tgoln1' | 78.44 | 70.81 | 74.8 | 75.9  | 40.1 | 26.35 | 55   | 71.55 | 80.77 | 90.09   |
| 22137 | 'Ttk'    | 0.02  | 0     | 0    | 0     | 0    | 0     | 0    | 0     | 0     | 0       |
| 22138 | 'Ttn'    | 0.03  | 0     | 0.26 | 0.11  | 0.02 | 0.04  | 0.03 | 0.03  | 0.03  | 0.03    |
| 22139 | 'Ttr'    | 0     | 0     | 0    | 11.5  | 0    | 0     | 0    | 3.7   | 7.97  | 0.14    |
| 22141 | 'Tub'    | 9.43  | 11.75 | 13.8 | 19.7  | 12.7 | 5.11  | 8.37 | 14.19 | 5.2   | 10.18   |
| 22142 | 'Tuba1a' | 1635  | 1632  | 2231 | 1538  | 1928 | 1981  | 1484 | 1896  | 1502  | 1901.53 |
| 22143 | 'Tuba1b' | 2256  | 1823  | 2086 | 1181  | 1897 | 2540  | 2464 | 2400  | 1982  | 2270.08 |
| 22145 | 'Tuba4a' | 191.8 | 165   | 318  | 106   | 163  | 304.8 | 209  | 216   | 156.2 | 188.42  |
| 22146 | 'Tuba1c' | 0.06  | 1.95  | 0.23 | 0.54  | 0.22 | 0.05  | 0.21 | 0.12  | 0.05  | 0.15    |
| 22151 | 'Tubb2a' | 872.3 | 700.4 | 817  | 504   | 879  | 942.2 | 800  | 878   | 593.1 | 680.74  |
| 22152 | 'Tubb3'  | 209.1 | 191.1 | 376  | 143   | 313  | 352.9 | 239  | 288.6 | 107.5 | 182.08  |
| 22153 | 'Tubb4a' | 551.8 | 522.5 | 576  | 333   | 587  | 895.2 | 509  | 928.1 | 541.6 | 558.28  |
| 22154 | 'Tubb5'  | 288.5 | 250.3 | 304  | 225   | 336  | 307.5 | 303  | 318.1 | 278   | 242.37  |
| 22156 | 'Tuft1'  | 0     | 0.91  | 7.02 | 7.39  | 0    | 1.81  | 0    | 0     | 0     | 0.33    |
| 22158 | 'Tulp3'  | 0.75  | 1.43  | 2.92 | 4.17  | 5.24 | 2.29  | 0.26 | 0.29  | 6.39  | 2.51    |
| 22166 | 'Txn1'   | 160.4 | 219.4 | 200  | 211   | 158  | 273.5 | 162  | 177.6 | 200.9 | 216.22  |
| 22169 | 'Cmpk2'  | 15.09 | 12.16 | 25.1 | 34.2  | 21.2 | 12.06 | 28.4 | 27.18 | 17.99 | 15.17   |
| 22171 | 'Tyms'   | 16.04 | 18.09 | 22   | 29.5  | 23.6 | 23.44 | 20.5 | 14.45 | 30.7  | 18.18   |
| 22173 | 'Tyr'    | 2.51  | 3.63  | 2.25 | 5.14  | 2.44 | 3.2   | 2.88 | 1.51  | 2.35  | 2.21    |
| 22174 | 'Tyro3'  | 3.06  | 2.36  | 2.6  | 0     | 4.58 | 3.3   | 1.51 | 7.98  | 9.01  | 1.39    |
| 22177 | 'Tyrobp' | 25.29 | 22.48 | 21.6 | 44.1  | 55   | 205.2 | 42.4 | 13.24 | 14.17 | 38.92   |
| 22178 | 'Tyrp1'  | 0     | 0     | 0    | 0     | 0    | 0     | 0    | 0     | 0     | 4.12    |
| 22183 | 'Zrsr1'  | 0.88  | 1.89  | 1.33 | 2.89  | 6.79 | 1.77  | 1.47 | 3.33  | 3.03  | 2.61    |
| 22184 | 'Zrsr2'  | 11.08 | 15.4  | 17.9 | 16.4  | 12.5 | 15.92 | 24.6 | 13.22 | 6.55  | 16.95   |
| 22185 | 'U2af2'  | 18.56 | 19.61 | 17.8 | 11.6  | 26.9 | 12.47 | 26.7 | 26.09 | 39.66 | 34.4    |
| 22186 | 'Uba52'  | 334.8 | 377.1 | 399  | 386   | 304  | 441.6 | 511  | 242.6 | 306.2 | 288.06  |
| 22187 | 'Ubb'    | 8536  | 8746  | 7058 | ##### | 9628 | 13192 | 7930 | 11020 | 10273 | 11620.2 |
| 22190 | 'Ubc'    | 1270  | 1393  | 1572 | 1345  | 1109 | 1688  | 1400 | 1253  | 1036  | 1516.2  |
| 22192 | 'Ube2m'  | 8.61  | 14.12 | 15.5 | 30.1  | 18.4 | 15.01 | 9.44 | 20.03 | 14.48 | 17.33   |
| 22193 | 'Ube2e3' | 64.19 | 46.09 | 35.5 | 42    | 52.4 | 71.77 | 37.7 | 46.64 | 102.5 | 52.66   |
| 22194 | 'Ube2e1' | 179.7 | 162.6 | 102  | 111   | 106  | 188.7 | 132  | 118.2 | 181.4 | 151.16  |
| 22195 | 'Ube2l3' | 120.1 | 117.3 | 108  | 115   | 71.7 | 116.2 | 86.1 | 97.21 | 126   | 104.92  |
| 22196 | 'Ube2l'  | 149.8 | 146.7 | 101  | 97.3  | 112  | 142.8 | 178  | 137.1 | 179.2 | 156.12  |
| 22200 | 'Uba3'   | 33.55 | 30.8  | 50   | 61    | 67.4 | 45.58 | 38.2 | 68.85 | 35.03 | 47.11   |
| 22201 | 'Uba1'   | 89.27 | 105.1 | 123  | 71.4  | 65.6 | 47.41 | 82   | 74.09 | 85.72 | 83.58   |
| 22202 | 'Uba1y'  | 0.24  | 0.11  | 0.45 | 0.57  | 0.46 | 0.35  | 0.33 | 2.66  | 0.23  | 0.24    |
| 22209 | 'Ube2a'  | 48.63 | 41.47 | 38   | 17.3  | 36.1 | 32.72 | 14.2 | 47.89 | 17.11 | 29.39   |
| 22210 | 'Ube2b'  | 191.7 | 278.6 | 158  | 265   | 149  | 194.2 | 179  | 179.4 | 147.5 | 158.17  |
| 22213 | 'Ube2g2' | 46.45 | 37.79 | 48.7 | 50.6  | 27.9 | 51.37 | 39.7 | 40.32 | 50.86 | 41.55   |
| 22214 | 'Ube2h'  | 12.48 | 23.21 | 15.5 | 26    | 12.5 | 4.4   | 9.05 | 16.84 | 13.25 | 13.69   |
| 22215 | 'Ube3a'  | 19.41 | 24.08 | 19.8 | 18    | 24.4 | 19.44 | 21.1 | 21.28 | 28.36 | 13.09   |
| 22217 | 'Usp12'  | 1.28  | 1.62  | 1.99 | 1.03  | 5.21 | 3.45  | 3.64 | 1.68  | 3.06  | 1.38    |
| 22218 | 'Sumo1'  | 283.8 | 328.4 | 200  | 363   | 275  | 260.9 | 388  | 275.1 | 266.8 | 301.6   |
| 22221 | 'Ubp1'   | 6.64  | 9.89  | 5.55 | 24.5  | 5.81 | 10.71 | 12.4 | 4.28  | 2.69  | 6.24    |
| 22222 | 'Ubr1'   | 8.31  | 8.14  | 5.71 | 5.33  | 6.96 | 1.55  | 19.1 | 16.69 | 11.52 | 16.88   |

|        |            |       |       |      |      |      |       |      |       |       |         |
|--------|------------|-------|-------|------|------|------|-------|------|-------|-------|---------|
| 22223  | 'Uchl1'    | 1076  | 1067  | 1067 | 777  | 1138 | 1303  | 1088 | 891.4 | 615.4 | 1016.81 |
| 22224  | 'Usp10'    | 31.54 | 33.43 | 29.2 | 31.1 | 23.5 | 15.01 | 55.3 | 24.18 | 38.18 | 27.45   |
| 22225  | 'Usp5'     | 150.1 | 159.6 | 180  | 107  | 135  | 142.2 | 162  | 168.5 | 165.5 | 158.47  |
| 22227  | 'Ucp1'     | 0     | 0     | 0    | 4.2  | 0    | 0     | 0    | 0     | 0     | 0       |
| 22228  | 'Ucp2'     | 44.06 | 40.07 | 28.4 | 72.5 | 49   | 60.83 | 51.2 | 13.4  | 16.41 | 93.96   |
| 22229  | 'Ucp3'     | 5.14  | 0     | 0.02 | 0    | 0    | 1.72  | 0    | 0     | 0     | 0       |
| 22230  | 'Ufd1'     | 116.6 | 96.42 | 105  | 160  | 120  | 137.1 | 121  | 112.6 | 118.7 | 139.6   |
| 22232  | 'Slc35a2'  | 31.94 | 25.42 | 15.9 | 58.6 | 25.8 | 33.41 | 25   | 24.74 | 38.02 | 36.34   |
| 22234  | 'Ugcg'     | 3.38  | 4.91  | 6.48 | 6.55 | 8.05 | 0.87  | 4.42 | 4.27  | 2.15  | 4.91    |
| 22235  | 'Ugdh'     | 15.48 | 2.77  | 24.9 | 21.3 | 2.97 | 4.01  | 18.6 | 13.94 | 18.65 | 6.79    |
| 22239  | 'Ugt8a'    | 2.72  | 3.52  | 3.11 | 0    | 3.26 | 4.23  | 2.94 | 1.61  | 1.08  | 0       |
| 22240  | 'Dpysl3'   | 20.21 | 12.87 | 18.6 | 7.57 | 16.6 | 20.89 | 22.8 | 16.11 | 12.34 | 7.61    |
| 22241  | 'Ulk1'     | 8.09  | 10.19 | 7.38 | 14   | 7.63 | 7.26  | 18.2 | 9.45  | 5.95  | 8.49    |
| 22242  | 'Umod'     | 0     | 0     | 0    | 0    | 0    | 0     | 0    | 0     | 6.3   | 0       |
| 22245  | 'Uck1'     | 78.13 | 70.35 | 66.8 | 39.2 | 68.8 | 107.1 | 72.1 | 57.03 | 74.58 | 90.04   |
| 22247  | 'Umps'     | 12.46 | 7.7   | 4.19 | 21.3 | 7.61 | 13.45 | 12.2 | 10.39 | 11.31 | 14.21   |
| 22248  | 'Unc119'   | 16.03 | 3.14  | 16.3 | 7.46 | 6    | 34.73 | 21.6 | 14.84 | 9.3   | 6.7     |
| 22249  | 'Unc13b'   | 1.51  | 1.44  | 0.04 | 1.61 | 2.34 | 0     | 0    | 0.66  | 0.01  | 1.2     |
| 22253  | 'Unc5c'    | 3.68  | 3.83  | 5.62 | 3.12 | 1.28 | 0.91  | 3.41 | 2.22  | 1.94  | 0.88    |
| 22255  | 'Uncx'     | 0.08  | 0.09  | 0    | 0    | 0.56 | 1.92  | 1.22 | 0     | 0     | 0       |
| 22256  | 'Ung'      | 0.11  | 0.12  | 2.4  | 0.26 | 0.05 | 0     | 0    | 0     | 4.7   | 0       |
| 22258  | 'Usp4'     | 40.5  | 33.31 | 24.3 | 57.1 | 26   | 8.75  | 35.7 | 29.56 | 57.58 | 33.57   |
| 22259  | 'Nr1h3'    | 0     | 0     | 2.17 | 0    | 3.26 | 0     | 0    | 0     | 0     | 0       |
| 22260  | 'Nr1h2'    | 16.07 | 17.49 | 24.5 | 11.5 | 20.4 | 24.96 | 26.9 | 18.11 | 13.63 | 19.02   |
| 22262  | 'Uox'      | 2.95  | 0     | 0    | 0    | 0    | 0     | 0    | 0     | 0     | 0       |
| 22264  | 'Prap1'    | 0     | 0.17  | 0    | 0    | 0    | 0     | 0    | 0     | 0     | 0.07    |
| 22268  | 'Upk1b'    | 1.9   | 0     | 0    | 0    | 2.72 | 0     | 0    | 0     | 0     | 0       |
| 22269  | 'Upk2'     | 3.55  | 0     | 0    | 0    | 0    | 0     | 0    | 0     | 0     | 0       |
| 22270  | 'Upk3a'    | 0     | 8.8   | 4.52 | 11.4 | 13.7 | 0     | 0    | 0     | 17.71 | 18.85   |
| 22271  | 'Upp1'     | 8.48  | 0     | 0    | 0    | 0    | 0     | 8.96 | 2.81  | 0.04  | 0       |
| 22272  | 'Uqcrq'    | 182.3 | 140.6 | 167  | 199  | 171  | 268.1 | 158  | 154.7 | 177.2 | 128.68  |
| 22273  | 'Uqcrc1'   | 481.9 | 373   | 669  | 547  | 531  | 751.7 | 704  | 568.1 | 555.8 | 585     |
| 22275  | 'Urod'     | 45.32 | 64.13 | 43.9 | 44.8 | 57   | 55.14 | 56.5 | 59.98 | 82.51 | 27.75   |
| 22276  | 'Uros'     | 54.53 | 49.55 | 29.9 | 11.9 | 37.8 | 68.34 | 38.4 | 54.36 | 47.1  | 70.53   |
| 22278  | 'Usf1'     | 49.49 | 56.41 | 77   | 40.1 | 95.5 | 49.39 | 62.7 | 91.74 | 61.05 | 49.48   |
| 22282  | 'Usf2'     | 5.29  | 5.21  | 14.3 | 0.02 | 6.32 | 2.1   | 19.5 | 3.45  | 4.48  | 2.97    |
| 22283  | 'Ush2a'    | 0     | 0     | 0    | 0    | 0    | 0.02  | 0    | 0     | 0     | 0       |
| 22284  | 'Usp9x'    | 15.74 | 11.53 | 9.32 | 12.8 | 16   | 10.25 | 9.48 | 14.11 | 10.48 | 14.61   |
| 22286  | 'Utf1'     | 0     | 0     | 0    | 0    | 0    | 0     | 0.04 | 0     | 0     | 0       |
| 22287  | 'Scgb1a1'  | 0     | 0     | 4.39 | 0    | 0    | 0     | 0    | 0     | 0     | 0       |
| 22288  | 'Utrn'     | 9.11  | 2.37  | 1.08 | 1.91 | 2.88 | 4.18  | 1.7  | 4.47  | 0     | 1.7     |
| 22289  | 'Kdm6a'    | 0.36  | 1.11  | 1.03 | 1.43 | 1.19 | 0.19  | 2.23 | 0.88  | 3.8   | 6.51    |
| 22290  | 'Uty'      | 3.54  | 3.7   | 0    | 0    | 0.14 | 0.43  | 3.7  | 2.76  | 2.36  | 6.36    |
| 22294  | 'Uxt'      | 5.19  | 3.53  | 38.9 | 0.11 | 6.3  | 14.36 | 2.02 | 6.37  | 4.5   | 9.8     |
| 22295  | 'Cdh23'    | 0.02  | 0     | 0    | 0.07 | 3.74 | 0.87  | 0    | 0     | 0.37  | 0       |
| 22305  | 'Vmn2r37'  | 0     | 0     | 0    | 0    | 0    | 0     | 0    | 0     | 0.01  | 0       |
| 22313  | 'Vmn2r104' | 0     | 0.06  | 0    | 0    | 0    | 0     | 0    | 0     | 0     | 0       |
| 22317  | 'Vamp1'    | 38.31 | 16.15 | 102  | 15.4 | 49.8 | 65.2  | 116  | 68.84 | 26.16 | 19.33   |
| 22318  | 'Vamp2'    | 638.6 | 599.6 | 487  | 204  | 645  | 566.6 | 629  | 891   | 719.5 | 751.69  |
| 22319  | 'Vamp3'    | 8.1   | 5.47  | 15.9 | 49.5 | 6.96 | 11.18 | 14.7 | 9.57  | 10.11 | 8.86    |
| 22320  | 'Vamp8'    | 0.54  | 12.44 | 0    | 46   | 13.1 | 61.1  | 12.5 | 7.08  | 4.47  | 20.78   |
| 22321  | 'Vars'     | 12.59 | 6.02  | 19.1 | 9.64 | 11.9 | 3.62  | 10.1 | 9.37  | 22.41 | 6.44    |
| 223227 | 'Sox21'    | 0     | 0     | 0    | 0    | 0.12 | 0     | 0    | 0     | 0.01  | 0       |
| 22323  | 'Vasp'     | 1.64  | 3.85  | 3.9  | 3.71 | 8.6  | 4.03  | 3.64 | 5.63  | 18.8  | 9.66    |
| 22324  | 'Vav1'     | 0.04  | 0     | 0.01 | 0.03 | 0.02 | 1.41  | 3.84 | 0.03  | 0.02  | 0       |
| 22325  | 'Vav2'     | 0     | 0.97  | 2.2  | 0    | 0.33 | 0.16  | 0    | 0.02  | 0     | 0.08    |
| 223254 | 'Farp1'    | 1.91  | 3.38  | 7.25 | 10.1 | 3.24 | 4.74  | 0.11 | 2.41  | 5.78  | 3.67    |
| 223255 | 'Stk24'    | 3.97  | 8.56  | 6.03 | 18.8 | 4.16 | 3.15  | 12.3 | 2.48  | 15.83 | 7.95    |

|        |                 |       |       |      |      |      |       |      |       |       |        |
|--------|-----------------|-------|-------|------|------|------|-------|------|-------|-------|--------|
| 22326  | 'Vax1'          | 0.79  | 0.39  | 0.71 | 0    | 2.24 | 0.57  | 0.91 | 0.44  | 0     | 1.64   |
| 223267 | 'Ggact'         | 31.36 | 33.77 | 31.7 | 10.4 | 17.7 | 19.25 | 22   | 49.82 | 24.46 | 14.54  |
| 22327  | 'Vbp1'          | 150.4 | 190.2 | 105  | 101  | 135  | 139.7 | 123  | 145.9 | 90.98 | 155.11 |
| 223272 | 'Itgbl1'        | 0     | 0     | 0.51 | 1.1  | 0    | 0     | 0    | 0.6   | 2.64  | 0.33   |
| 22329  | 'Vcam1'         | 7.12  | 0.54  | 2.13 | 2.75 | 1.45 | 10.46 | 0    | 2.61  | 0     | 0      |
| 22330  | 'Vcl'           | 2.52  | 0.51  | 1.83 | 3.63 | 2.67 | 0     | 1.77 | 2.82  | 2.12  | 3.11   |
| 22333  | 'Vdac1'         | 272.8 | 203.5 | 294  | 145  | 296  | 301.1 | 352  | 241.3 | 222   | 166.46 |
| 223332 | 'Ranbp3l'       | 1.1   | 0.12  | 0.23 | 0.18 | 0.16 | 0.16  | 0.13 | 0.22  | 0.18  | 0.12   |
| 22334  | 'Vdac2'         | 181.5 | 205.9 | 137  | 180  | 191  | 191.9 | 209  | 224.9 | 213.9 | 211.14 |
| 22335  | 'Vdac3'         | 458.7 | 391.3 | 340  | 352  | 378  | 538.6 | 428  | 452.3 | 338.1 | 339.21 |
| 22337  | 'Vdr'           | 0     | 0     | 0    | 0.41 | 0    | 0     | 0    | 0     | 0     | 0      |
| 22339  | 'Vegfa'         | 0.21  | 0.49  | 0.69 | 3.11 | 2.84 | 1.63  | 1.09 | 0.95  | 0.11  | 1.1    |
| 22340  | 'Vegfb'         | 18.21 | 8.61  | 7.61 | 4.26 | 30.4 | 5.6   | 10.9 | 13.99 | 10.25 | 12.35  |
| 22341  | 'Vegfc'         | 0     | 0.1   | 0.18 | 0    | 0    | 0     | 0    | 0     | 0     | 0      |
| 22342  | 'Lin7b'         | 124.8 | 69.67 | 139  | 216  | 102  | 147.2 | 69.7 | 103.4 | 102.5 | 91.77  |
| 22343  | 'Lin7c'         | 17.86 | 14.94 | 12.1 | 11.4 | 11.6 | 1.09  | 14   | 8.7   | 14.13 | 22.43  |
| 223433 | 'Otulinl'       | 2.92  | 3.45  | 1.79 | 0    | 9.54 | 2.86  | 0.02 | 4.84  | 0     | 1.31   |
| 223435 | 'Trio'          | 0.85  | 1.2   | 0.25 | 2.11 | 1.38 | 0.34  | 0.54 | 1.61  | 1.01  | 1.67   |
| 22344  | 'Vezf1'         | 6.24  | 6.78  | 12   | 9.13 | 5.19 | 6.07  | 8.58 | 4.82  | 3.96  | 4.8    |
| 223453 | 'Dap'           | 1.9   | 3.52  | 3.72 | 7.65 | 6    | 24.32 | 0.72 | 0.03  | 24.1  | 12.32  |
| 223455 | 'March6'        | 8.69  | 6.69  | 12.7 | 11.3 | 8.33 | 7.07  | 20.6 | 8.12  | 11.34 | 19.53  |
| 22346  | 'Vhl'           | 26.09 | 10.15 | 11.7 | 31.6 | 14.6 | 28.03 | 14.1 | 12.25 | 29.28 | 6.47   |
| 223473 | 'Nipal2'        | 5     | 3.1   | 4.64 | 7.56 | 6.3  | 1.22  | 8.02 | 12.07 | 4.18  | 3.65   |
| 22348  | 'Slc32a1'       | 5.76  | 1.07  | 2.81 | 0.08 | 11.6 | 1.92  | 0.16 | 2.88  | 3.36  | 1.16   |
| 22349  | 'Vil1'          | 0     | 0.05  | 0.02 | 0    | 0    | 0     | 0    | 0     | 0.23  | 0      |
| 223499 | 'Dcaf13'        | 8.59  | 26.63 | 32.8 | 24.2 | 29.1 | 32.37 | 28.4 | 31.73 | 23.83 | 34.56  |
| 22350  | 'Ezr'           | 12.02 | 6.54  | 0.09 | 18.2 | 13.3 | 3.23  | 2.07 | 0.05  | 0.59  | 2.15   |
| 22351  | 'Vill'          | 0     | 2.02  | 0    | 0    | 7.64 | 0     | 0    | 4.53  | 3.51  | 0.02   |
| 223513 | 'Abra'          | 0.03  | 0     | 0.08 | 0.03 | 0    | 0.03  | 0    | 0.05  | 0     | 0.02   |
| 22352  | 'Vim'           | 3.96  | 0     | 0.13 | 0.03 | 32.8 | 0     | 3.29 | 1.56  | 0.42  | 7.71   |
| 223527 | 'Eny2'          | 42.99 | 36.83 | 34.7 | 11.8 | 22.2 | 29.48 | 23.4 | 29.34 | 25.43 | 32.45  |
| 22353  | 'Vip'           | 0     | 0     | 1.79 | 0    | 0    | 0.42  | 4.6  | 85.08 | 9.61  | 0.03   |
| 22354  | 'Vipr1'         | 0     | 0     | 0    | 0    | 0    | 0     | 0    | 0     | 0.21  | 0      |
| 22355  | 'Vipr2'         | 4.43  | 0     | 0.1  | 0    | 0    | 1.75  | 0    | 0     | 0.03  | 0      |
| 22359  | 'Vldlr'         | 6.15  | 12.78 | 13.2 | 7.09 | 8.79 | 3.59  | 3.76 | 5.36  | 4.96  | 3.98   |
| 223593 | 'Washc5'        | 4.61  | 11.94 | 12   | 9.14 | 15.1 | 1.68  | 7.18 | 10.61 | 14.04 | 8.85   |
| 22360  | 'Nrsn1'         | 471.1 | 279.2 | 223  | 424  | 256  | 234.3 | 298  | 387.9 | 147.9 | 236.03 |
| 223601 | 'Fam49b'        | 26.36 | 16.71 | 28.9 | 20.9 | 22.2 | 14.41 | 30.6 | 26.05 | 33.17 | 21.38  |
| 223604 | 'Kcnk9'         | 0.37  | 0     | 2.28 | 0.97 | 1.79 | 0.56  | 0.76 | 0.41  | 3.35  | 1.96   |
| 22361  | 'Vnn1'          | 0     | 0     | 2.58 | 0    | 0    | 0     | 0    | 0     | 0     | 0      |
| 223626 | 'Them6'         | 0     | 1.18  | 0.16 | 0    | 2.88 | 3.27  | 4.57 | 0.41  | 2.19  | 0.23   |
| 22364  | 'Vpreb3'        | 0     | 0     | 0    | 0    | 0.97 | 0     | 0    | 0     | 0     | 1.88   |
| 223642 | 'Zc3h3'         | 19.78 | 8.43  | 11.9 | 2.69 | 7.32 | 5.73  | 9.69 | 7.23  | 4.11  | 21.92  |
| 223646 | 'Naprt'         | 4.66  | 5.56  | 6.23 | 19.5 | 4.92 | 11.95 | 6.22 | 1.85  | 7.79  | 0      |
| 223648 | 'Ccdc166'       | 9.48  | 20.25 | 17.6 | 21.2 | 15.1 | 10.31 | 18.1 | 18.83 | 8.63  | 16.36  |
| 223649 | 'Nrbp2'         | 18.37 | 8.47  | 5.52 | 23.8 | 27.4 | 4.89  | 7.34 | 3.16  | 4.19  | 2.6    |
| 22365  | 'Vps45'         | 42.92 | 35.73 | 28   | 25.4 | 28.9 | 33.87 | 45.8 | 21.93 | 35.79 | 25.02  |
| 223650 | 'Eppk1'         | 0.26  | 0.21  | 0    | 0    | 0    | 0     | 0    | 0.06  | 0     | 0.08   |
| 223658 | 'Mroh1'         | 5.44  | 4.19  | 12.4 | 8.04 | 15.1 | 3.55  | 10.2 | 6.09  | 9.32  | 9.02   |
| 223664 | 'Lrrc14'        | 30.17 | 20.96 | 15.2 | 4.74 | 20   | 23.58 | 37.9 | 12.95 | 10.51 | 4.75   |
| 223665 | 'C030006K11Rik' | 3.9   | 2.71  | 9.5  | 0.38 | 18.8 | 9.07  | 12.1 | 4.14  | 4.83  | 5.07   |
| 223666 | 'Arhgap39'      | 0.27  | 1.83  | 3.29 | 2.92 | 2.9  | 0.28  | 0.38 | 0.11  | 4.04  | 0.55   |
| 223669 | 'Zfp7'          | 1.19  | 0.43  | 9.72 | 0    | 12.7 | 3.36  | 2.4  | 5.49  | 4.04  | 0.05   |
| 22367  | 'Vrk1'          | 2.4   | 7.94  | 16.8 | 7.88 | 5.4  | 15.96 | 14.7 | 8.82  | 2.83  | 3.19   |
| 223672 | 'Apol9a'        | 0     | 2.38  | 0.03 | 0    | 0    | 0     | 0    | 3.92  | 1.48  | 4.64   |
| 22368  | 'Trpv2'         | 16.78 | 31.48 | 22.9 | 16.6 | 11.7 | 22.94 | 15.4 | 20.88 | 16.96 | 26.95  |
| 223690 | 'Ankrd54'       | 37.42 | 31.82 | 31.5 | 61.2 | 17.3 | 13.65 | 40.9 | 19.56 | 33.69 | 13.32  |
| 223691 | 'Eif3l'         | 38.84 | 74.89 | 60.9 | 63.9 | 61.6 | 58.27 | 67.3 | 84.38 | 57.62 | 87.28  |



|        |                 |       |       |      |      |      |       |      |       |       |        |
|--------|-----------------|-------|-------|------|------|------|-------|------|-------|-------|--------|
| 223693 | 'Tmem184b'      | 11.27 | 15.97 | 24.5 | 5.29 | 12.1 | 6.48  | 12.8 | 8.7   | 15.17 | 9.66   |
| 223696 | 'Tomm22'        | 115.2 | 89.68 | 93.4 | 92   | 70.2 | 87.98 | 93   | 100.6 | 87.86 | 112.53 |
| 223697 | 'Sun2'          | 1.74  | 1.17  | 0.09 | 0    | 0.21 | 1.37  | 0    | 0.06  | 0     | 0      |
| 22370  | 'Vtn'           | 0     | 0     | 0    | 0    | 0    | 0     | 0    | 0     | 0.5   | 0      |
| 223701 | 'Mkl1'          | 0.3   | 0.58  | 6.47 | 5.47 | 3.96 | 5.91  | 5.05 | 2.51  | 6.05  | 2.31   |
| 223722 | 'Mcat'          | 1.98  | 4.71  | 5.02 | 0    | 2.22 | 4.94  | 0.26 | 9.71  | 9.78  | 0      |
| 223723 | 'Ttl12'         | 10.2  | 3.87  | 7.77 | 1.15 | 4.64 | 5.91  | 6.82 | 5.19  | 7.58  | 12.04  |
| 223726 | 'Mpped1'        | 16.8  | 2.96  | 4.09 | 6.73 | 20.9 | 8.51  | 24.6 | 5.52  | 0.03  | 29.95  |
| 223732 | 'Rtl6'          | 17.71 | 12.93 | 18.5 | 3.12 | 16.5 | 6.07  | 15.6 | 17.44 | 13    | 20.87  |
| 223739 | '5031439G07Rik' | 12.2  | 13.4  | 12.4 | 1.83 | 29.8 | 22.82 | 14.2 | 20.14 | 7.01  | 9.08   |
| 22375  | 'Wars'          | 57.24 | 57.16 | 80   | 9.79 | 64.5 | 43.1  | 66.2 | 66.49 | 35.44 | 37.39  |
| 223752 | 'Gramd4'        | 1.82  | 2.15  | 0.8  | 7.43 | 0    | 5.68  | 0    | 0.75  | 0     | 0.45   |
| 223753 | 'Cerk'          | 0.78  | 3.51  | 4.27 | 0.3  | 2.05 | 2.92  | 3.32 | 0.37  | 0.01  | 0.46   |
| 223754 | 'Tbc1d22a'      | 11.81 | 5.89  | 6.73 | 6.07 | 9.59 | 5.41  | 3.44 | 5.65  | 4.68  | 7.62   |
| 22376  | 'Was'           | 0.02  | 0     | 0    | 0.05 | 0.42 | 0     | 0    | 0     | 0.04  | 0      |
| 22377  | 'Wbp1'          | 30.32 | 9.24  | 13.9 | 13.6 | 55.2 | 9.63  | 9.27 | 10.8  | 22.2  | 9.46   |
| 223770 | 'Brd1'          | 6.04  | 4.63  | 5.59 | 5.87 | 8.17 | 3.19  | 3.11 | 4.24  | 5.37  | 7.22   |
| 223773 | 'Zbed4'         | 0     | 0.97  | 2.2  | 1.89 | 0    | 0     | 5.87 | 1.54  | 2.67  | 0.01   |
| 223774 | 'Alg12'         | 29.61 | 19.61 | 14   | 13.6 | 0    | 5.29  | 6.76 | 19.07 | 13.73 | 7.63   |
| 223775 | 'Pim3'          | 20.75 | 44.5  | 33.3 | 67.1 | 11.6 | 20.18 | 33.6 | 10.62 | 25.31 | 7.5    |
| 223776 | 'Selenoo'       | 5.43  | 2.23  | 10.3 | 15.3 | 7.04 | 0.96  | 4.8  | 4.76  | 4.53  | 0.67   |
| 22378  | 'Wbp2'          | 308.5 | 347.6 | 420  | 283  | 375  | 408.6 | 375  | 349.3 | 449.7 | 292.23 |
| 22379  | 'Fmnl3'         | 0     | 0     | 0.01 | 0    | 0    | 0.7   | 0.64 | 0.59  | 0     | 0.29   |
| 22380  | 'Wbp4'          | 11.62 | 15.74 | 11.3 | 22.8 | 15.1 | 15.71 | 19.8 | 22.74 | 19.52 | 14.82  |
| 22381  | 'Tceal9'        | 377.8 | 507.3 | 321  | 632  | 444  | 475   | 276  | 427.8 | 384.9 | 496.41 |
| 223827 | 'Gxylt1'        | 0.57  | 0.85  | 0.03 | 4.94 | 0.58 | 0.36  | 1.54 | 0.49  | 0.6   | 0.99   |
| 223828 | 'Pphln1'        | 23.93 | 9.81  | 6.8  | 28.6 | 7.38 | 1.67  | 12.3 | 15.78 | 25.4  | 14.03  |
| 223838 | 'Adamts20'      | 2.12  | 0.02  | 0.17 | 0.94 | 0.01 | 0     | 0    | 0     | 0.82  | 0      |
| 22384  | 'Eif4h'         | 207.9 | 217.1 | 224  | 173  | 173  | 212.7 | 272  | 199.4 | 191   | 190.16 |
| 223843 | 'Dbx2'          | 12.34 | 4.58  | 1.12 | 4.75 | 0.02 | 0.02  | 4.51 | 3.05  | 1.69  | 1.57   |
| 22385  | 'Baz1b'         | 7.61  | 10.9  | 8.81 | 15.6 | 7.66 | 4.86  | 5.21 | 5.05  | 6.16  | 4.99   |
| 223864 | 'Rapgef3'       | 25.31 | 17    | 21.5 | 0.16 | 14.2 | 12.52 | 16.4 | 10.65 | 8.39  | 13.96  |
| 223870 | 'Senp1'         | 0.24  | 1.99  | 1.32 | 9.43 | 3.27 | 2.34  | 2.17 | 1.63  | 0.33  | 2.41   |
| 22388  | 'Wdr1'          | 149.6 | 151.2 | 193  | 81.6 | 117  | 96.74 | 181  | 175.2 | 212.3 | 142.9  |
| 223881 | 'Rnd1'          | 31.12 | 20.12 | 23.3 | 33.4 | 24.4 | 35.18 | 32.8 | 28.22 | 12.15 | 9.71   |
| 22390  | 'Wee1'          | 2.92  | 6.45  | 3.34 | 4.09 | 5.35 | 0.16  | 0.89 | 4.01  | 2.88  | 10.25  |
| 223915 | 'Krt73'         | 1.04  | 2.09  | 2.57 | 9.38 | 0.02 | 0     | 0.02 | 0     | 0     | 0      |
| 223917 | 'Krt79'         | 0     | 0     | 0    | 0    | 0    | 0     | 0.07 | 0     | 0     | 0      |
| 223918 | 'Spryd3'        | 77.93 | 69.67 | 96.1 | 51.7 | 96.2 | 57.41 | 111  | 119   | 170   | 134.93 |
| 223920 | 'Soat2'         | 1.2   | 1.56  | 3.04 | 3.11 | 2.16 | 1.88  | 3.07 | 0.65  | 2.54  | 1.15   |
| 223921 | 'Aaas'          | 29.71 | 10.79 | 14.1 | 0    | 12.9 | 26.11 | 13.8 | 15.8  | 20.56 | 10.19  |
| 223922 | 'Atf7'          | 1.94  | 0.08  | 3.97 | 0.85 | 0.26 | 3.05  | 5.14 | 0.39  | 10.57 | 0.3    |
| 22393  | 'Wfs1'          | 39.57 | 58.9  | 29.2 | 40.7 | 11.5 | 19.33 | 31.4 | 25.74 | 9.84  | 27.64  |
| 223970 | 'Rmi2'          | 0.17  | 0.14  | 0.16 | 0.34 | 0.48 | 0.11  | 0.22 | 2.14  | 0.25  | 0.2    |
| 223978 | 'Cpped1'        | 7.84  | 6.88  | 10.4 | 0.83 | 0.83 | 7.89  | 0.21 | 3.8   | 18.84 | 5.42   |
| 223989 | 'Marf1'         | 37.38 | 25.6  | 16.7 | 12.3 | 41.3 | 29.65 | 22.8 | 46.46 | 50.51 | 41.38  |
| 224008 | 'Spidr'         | 0.34  | 0.63  | 1.72 | 0.2  | 0    | 0.63  | 0    | 0     | 0     | 0      |
| 22401  | 'Zmat3'         | 2.09  | 3.54  | 3.47 | 4.34 | 5.66 | 0.21  | 5.23 | 1.69  | 2.3   | 1.87   |
| 224014 | 'Fgd4'          | 6.87  | 5.83  | 4.24 | 5.33 | 4.99 | 0.48  | 1.75 | 0.82  | 4.96  | 4.07   |
| 224019 | 'Tmem191c'      | 63.63 | 51.49 | 62.9 | 77.9 | 84.7 | 88.66 | 43.6 | 62.43 | 60.85 | 54.72  |
| 22402  | 'Wisp1'         | 0     | 0     | 0.3  | 0    | 0    | 0     | 0    | 0     | 0     | 0      |
| 224020 | 'Pi4ka'         | 10.67 | 8.22  | 7.07 | 32.1 | 13.2 | 16.85 | 4.73 | 10.18 | 12.72 | 11.4   |
| 224022 | 'Slc7a4'        | 79.24 | 83.24 | 40.8 | 32   | 69.8 | 86.34 | 79.4 | 68.98 | 60.39 | 101.53 |
| 224023 | 'Klhl22'        | 54.62 | 45.38 | 46.2 | 43.2 | 33.5 | 18.02 | 92.6 | 62.03 | 73.9  | 46.5   |
| 224024 | 'Scarf2'        | 0.01  | 0.01  | 0.23 | 1.6  | 0.5  | 0     | 0    | 0     | 1.26  | 0      |
| 22404  | 'Wiz'           | 0.43  | 1.17  | 1.88 | 0.27 | 3.11 | 0.01  | 7.98 | 1.26  | 4.86  | 2.03   |
| 224045 | 'Eif2b5'        | 2.47  | 4.65  | 16.1 | 13.8 | 7.93 | 7.27  | 3.37 | 7.85  | 31.41 | 1.62   |
| 224055 | 'Rtp2'          | 0     | 2.17  | 0    | 0    | 5.01 | 0     | 0    | 1.79  | 0     | 2.38   |

|        |             |       |       |      |      |      |       |      |       |       |        |
|--------|-------------|-------|-------|------|------|------|-------|------|-------|-------|--------|
| 224079 | 'Atp13a4'   | 5.37  | 3.38  | 3.35 | 0    | 0    | 0     | 5.51 | 1.23  | 5.56  | 0      |
| 22408  | 'Wnt1'      | 0     | 0     | 0    | 0    | 0    | 0.02  | 0    | 0     | 0     | 0      |
| 224088 | 'Atp13a3'   | 0.23  | 1.25  | 0.2  | 3.67 | 1.27 | 0.62  | 1.41 | 0.68  | 0.71  | 0.93   |
| 22409  | 'Wnt10a'    | 1.55  | 0     | 0    | 0    | 0    | 0     | 0    | 2.23  | 0     | 0      |
| 224090 | 'Tmem44'    | 4.43  | 2.08  | 4.44 | 6.3  | 3.34 | 4.8   | 7.76 | 4.13  | 2.13  | 0      |
| 224092 | 'Lsg1'      | 12.76 | 22.01 | 18.6 | 3.9  | 29.4 | 10.11 | 14.9 | 23.47 | 7.08  | 12.3   |
| 224093 | 'Fam43a'    | 3.23  | 1.52  | 4.06 | 2.2  | 0    | 0     | 0    | 1.93  | 0.03  | 0      |
| 224105 | 'Pak2'      | 4.98  | 5.74  | 8.1  | 6.09 | 4.18 | 2.33  | 2.89 | 1.39  | 4.77  | 8.73   |
| 224109 | 'Nrros'     | 2.74  | 2.21  | 0.02 | 10.8 | 0    | 0     | 0    | 0     | 0     | 2.41   |
| 224111 | 'Ubxn7'     | 2.49  | 3.23  | 3.93 | 0.61 | 1.56 | 0.61  | 5.04 | 4.33  | 5.04  | 7.81   |
| 224116 | 'Muc20'     | 0     | 0     | 0    | 0    | 0    | 0     | 0    | 0     | 0.01  | 0      |
| 224129 | 'Adcy5'     | 4.44  | 3.25  | 6.23 | 0.5  | 2.52 | 4.96  | 1.85 | 0.92  | 3.57  | 2.35   |
| 22413  | 'Wnt2'      | 0     | 1.29  | 0    | 0    | 1.49 | 0     | 0    | 0.15  | 0     | 0      |
| 224132 | 'Dirc2'     | 1.88  | 2.01  | 2.6  | 9.14 | 0.11 | 0.46  | 0.02 | 2.9   | 1.7   | 2.66   |
| 224139 | 'Golgb1'    | 9.14  | 9.86  | 8.09 | 12.7 | 10.4 | 10.04 | 10   | 6.54  | 9.04  | 11.44  |
| 22414  | 'Wnt2b'     | 0.19  | 0     | 0.01 | 0    | 0.05 | 0     | 0    | 0.23  | 0     | 0      |
| 224143 | 'Poglut1'   | 58.96 | 54.34 | 81.3 | 50.7 | 46.9 | 51.18 | 76.8 | 43.93 | 103.8 | 49.42  |
| 22415  | 'Wnt3'      | 0     | 0.09  | 1.81 | 2.57 | 3.78 | 9.87  | 11   | 0.71  | 0.08  | 7.58   |
| 22417  | 'Wnt4'      | 4.42  | 4.47  | 0.73 | 0.15 | 0.29 | 4.1   | 0.12 | 3.45  | 2.23  | 2.01   |
| 224170 | 'Dzip3'     | 32.8  | 20.52 | 18.9 | 20.9 | 17.6 | 18.27 | 25.4 | 26.62 | 19.06 | 27.66  |
| 224171 | 'Cip2a'     | 1.84  | 0     | 0.02 | 0.46 | 0    | 0     | 0    | 0.43  | 0.02  | 0      |
| 22418  | 'Wnt5a'     | 0     | 2.1   | 0.03 | 0    | 3.2  | 0     | 0    | 0     | 0     | 1.18   |
| 22419  | 'Wnt5b'     | 1.79  | 0     | 0    | 0    | 8.44 | 0     | 4.56 | 0.02  | 0     | 5.43   |
| 22420  | 'Wnt6'      | 0     | 0.44  | 0    | 0    | 0    | 0     | 1.11 | 0     | 0     | 0.04   |
| 22421  | 'Wnt7a'     | 0.41  | 2.65  | 3.82 | 11.2 | 0    | 0     | 1.78 | 1.3   | 0     | 0      |
| 22422  | 'Wnt7b'     | 0     | 3.14  | 4.76 | 3.58 | 0.01 | 4.69  | 4.51 | 2.43  | 3.47  | 2.41   |
| 224224 | 'Impg2'     | 0     | 0.16  | 0    | 0    | 0    | 0     | 0    | 0.02  | 0.06  | 1.21   |
| 224250 | 'Cldnd1'    | 52.3  | 61.3  | 47.7 | 54.6 | 86.4 | 111.9 | 72.4 | 76.15 | 59.54 | 72.58  |
| 22427  | 'Wrn'       | 0.66  | 2.03  | 0.83 | 0    | 0.02 | 2.2   | 1.47 | 1.34  | 0.76  | 2.59   |
| 224273 | 'Crybg3'    | 0.53  | 0.67  | 0.62 | 0    | 0.53 | 0.06  | 0    | 0.43  | 0.32  | 0.39   |
| 22428  | 'Dctn6'     | 124.9 | 117.4 | 148  | 116  | 182  | 173.7 | 127  | 164.9 | 101.4 | 139.24 |
| 22433  | 'Xbp1'      | 121.2 | 124.5 | 98.3 | 156  | 128  | 155.7 | 135  | 83.88 | 200.1 | 83.91  |
| 224344 | 'Rbm11'     | 5.74  | 2.8   | 10.7 | 0.02 | 5.03 | 18.85 | 5.76 | 9.7   | 4.95  | 5.96   |
| 22437  | 'Xirp1'     | 0     | 0     | 0.03 | 0.01 | 0    | 0.01  | 0.01 | 0     | 0     | 0.01   |
| 22439  | 'Xk'        | 4.59  | 0.22  | 3.12 | 0    | 0.41 | 0     | 4.95 | 1.69  | 1.53  | 3.24   |
| 224405 | 'Cyr1'      | 0     | 0     | 0.01 | 0    | 0    | 0     | 0    | 0     | 0     | 0      |
| 22441  | 'Xlr'       | 0     | 0.06  | 0    | 0.21 | 0    | 5.94  | 0    | 1.96  | 0     | 0      |
| 224432 | 'Scaf4'     | 3.72  | 2.9   | 5.51 | 6.17 | 1.96 | 2.73  | 4.34 | 3.02  | 2.1   | 2.81   |
| 224440 | 'Setd4'     | 10.07 | 7.4   | 3.06 | 2.39 | 6.83 | 1.39  | 3.51 | 6.49  | 3.84  | 4.61   |
| 22445  | 'Xlr3a'     | 5.64  | 23.73 | 7.59 | 0    | 5.19 | 0     | 17.4 | 5.39  | 0.04  | 0      |
| 224454 | 'Zdhhc14'   | 10.06 | 12.43 | 2.61 | 16.9 | 4.21 | 7.51  | 11.8 | 8.7   | 3.94  | 7.65   |
| 22446  | 'Xlr3c'     | 0.11  | 0     | 0.04 | 0    | 0    | 0     | 0    | 0     | 0.03  | 0.05   |
| 224480 | 'Nox3'      | 0     | 0     | 0    | 0    | 0.41 | 0     | 0    | 0     | 0     | 0      |
| 224481 | 'Tfb1m'     | 7.45  | 6.22  | 4.49 | 18.1 | 24.9 | 8.6   | 6.12 | 2.03  | 4.44  | 18.02  |
| 224530 | 'Acat3'     | 2.87  | 0.14  | 0.07 | 0.05 | 2.61 | 0     | 0.02 | 0.03  | 0     | 0.98   |
| 224576 | 'Vmn2r106'  | 0     | 0     | 0    | 0    | 0    | 0     | 0    | 0     | 0     | 0.11   |
| 224585 | 'Zfp160'    | 2.07  | 3.43  | 2.06 | 0    | 1.82 | 2.9   | 9.4  | 3.34  | 8.23  | 6.21   |
| 224598 | 'Zfp758'    | 4.22  | 3.63  | 2.96 | 0.19 | 1    | 2.79  | 3.64 | 1.31  | 2.81  | 0      |
| 224613 | 'Flywch1'   | 247.5 | 210   | 297  | 178  | 201  | 256.2 | 288  | 196.1 | 287.5 | 178.78 |
| 224617 | 'Tbc1d24'   | 3.2   | 2.96  | 2.75 | 3.92 | 4.25 | 1.62  | 1.53 | 3.36  | 3.89  | 1.95   |
| 224619 | 'Traf7'     | 14.86 | 14.01 | 20.3 | 12.3 | 14.3 | 5.27  | 23.1 | 11.72 | 10.43 | 7.7    |
| 224624 | 'Rab40c'    | 0.09  | 2.79  | 4.23 | 8.6  | 0.42 | 13.82 | 5.62 | 0.02  | 4.29  | 5.52   |
| 224630 | 'Bnip1'     | 41.98 | 20.23 | 27.1 | 28   | 17.3 | 46.61 | 50.2 | 34.02 | 15.74 | 26.76  |
| 224640 | 'Lemd2'     | 4.08  | 1.38  | 4.86 | 0    | 7.37 | 3.02  | 2.03 | 2.19  | 4.53  | 1.84   |
| 224647 | 'D17Wsu92e' | 9.05  | 6.4   | 6.26 | 8.27 | 6.15 | 11.2  | 3.15 | 8.04  | 8     | 7      |
| 224648 | 'Uhrf1bp1'  | 1.22  | 0.53  | 0    | 0.38 | 2.74 | 3.28  | 0.04 | 1.51  | 1.74  | 0.41   |
| 224650 | 'Anks1'     | 2.72  | 0.74  | 2.48 | 0.54 | 1.58 | 1.53  | 4.88 | 2.97  | 0.06  | 0.54   |
| 224656 | 'Zfp523'    | 16.58 | 9.83  | 17.7 | 17   | 25   | 13.01 | 17.7 | 5.88  | 18.21 | 11.47  |

|        |                 |       |       |      |      |      |       |      |       |       |        |
|--------|-----------------|-------|-------|------|------|------|-------|------|-------|-------|--------|
| 224661 | 'Slc26a8'       | 0.04  | 0.43  | 0.7  | 7.15 | 0.43 | 0     | 0    | 0     | 0     | 0.72   |
| 224671 | 'Btbd9'         | 10.14 | 8.48  | 13.1 | 18.8 | 13.3 | 9.77  | 20   | 9.11  | 10.33 | 7.7    |
| 224674 | 'Slc37a1'       | 1.91  | 5.73  | 5.04 | 0    | 3.67 | 3.94  | 0.05 | 2.49  | 10.16 | 15.1   |
| 224691 | 'Zfp472'        | 0.24  | 0     | 3.36 | 0    | 0    | 0     | 0    | 0.72  | 3.53  | 4.67   |
| 224694 | 'Zfp81'         | 3.3   | 6.43  | 6.97 | 3.13 | 8.22 | 0.61  | 0.02 | 1.28  | 1.2   | 0.09   |
| 224697 | 'Adamts10'      | 4.6   | 3.05  | 14.8 | 4.25 | 7.19 | 2.72  | 7.08 | 3.17  | 11.05 | 17.98  |
| 224703 | 'March2'        | 14.57 | 7.95  | 8.68 | 19.7 | 24.7 | 9.03  | 13.9 | 17.66 | 9.63  | 5.67   |
| 224705 | 'Vps52'         | 13.96 | 13.81 | 19.8 | 11.9 | 27.8 | 19.15 | 21.8 | 33.79 | 31.47 | 13.7   |
| 224727 | 'Bag6'          | 13.46 | 12.75 | 8.53 | 6.4  | 10.7 | 12.08 | 8.77 | 16.31 | 23.81 | 11.88  |
| 224742 | 'Abcf1'         | 21.6  | 21.22 | 20.2 | 45.9 | 28   | 25.22 | 36.4 | 24.6  | 21.59 | 23.94  |
| 224792 | 'Adgrf5'        | 0.01  | 0.67  | 0    | 0    | 0.2  | 1.32  | 0    | 0     | 0     | 0.61   |
| 224794 | 'Enpp4'         | 4.96  | 3.91  | 1.1  | 9.72 | 2.84 | 2.45  | 2.54 | 5.88  | 2.32  | 5.96   |
| 224796 | 'Clic5'         | 0.01  | 0     | 0.02 | 0    | 0.56 | 0.02  | 0.01 | 0.03  | 0.01  | 0.01   |
| 224805 | 'Aars2'         | 8.02  | 8.27  | 11.1 | 0.07 | 1.86 | 7.21  | 9.07 | 7.08  | 10.07 | 8.56   |
| 224807 | 'Tmem63b'       | 25.77 | 18.56 | 29.7 | 5.52 | 24.9 | 15.51 | 28.5 | 13.3  | 14.47 | 17.27  |
| 224813 | 'Lrrc73'        | 6.26  | 3.67  | 4.84 | 26.5 | 3.69 | 8.71  | 4.49 | 1.41  | 9.03  | 2.41   |
| 224814 | 'Abcc10'        | 3.55  | 3.52  | 9.85 | 9.55 | 3.39 | 4.41  | 6.5  | 3.98  | 6.58  | 2.06   |
| 224823 | 'Rrp36'         | 26.25 | 34.39 | 20.5 | 33.6 | 35.2 | 44.26 | 31.6 | 41.74 | 13.38 | 41.64  |
| 224824 | 'Pex6'          | 3.9   | 10.8  | 3.45 | 6.18 | 2.95 | 3.44  | 7.85 | 0.01  | 5.2   | 2.54   |
| 224826 | 'Ubr2'          | 1.38  | 5.66  | 3.49 | 7.47 | 2.78 | 3.45  | 2.72 | 1.75  | 8.56  | 3.22   |
| 224829 | 'Tref1'         | 1.39  | 2.66  | 4.68 | 0.88 | 3.28 | 1.48  | 7.73 | 2.17  | 0.97  | 2.26   |
| 224836 | 'Usp49'         | 1.66  | 0.23  | 0.33 | 1.24 | 0.6  | 0.91  | 1.54 | 0.46  | 1.22  | 2.16   |
| 224840 | 'Trem14'        | 0.02  | 0     | 0    | 0    | 0.12 | 0     | 0    | 0     | 0     | 0      |
| 224860 | 'Plcl2'         | 5.66  | 0.88  | 0.3  | 0.5  | 1.6  | 1.93  | 4.25 | 3.79  | 7.14  | 1.3    |
| 224893 | 'Zfp959'        | 0.44  | 0.97  | 0.12 | 12.2 | 0.94 | 0.74  | 4.39 | 4.29  | 4.85  | 6.25   |
| 224897 | 'Dpp9'          | 11.88 | 4.8   | 9.15 | 7.1  | 5.79 | 8.94  | 11.2 | 7.12  | 15.07 | 10.52  |
| 224902 | 'Safb2'         | 23.98 | 15.46 | 16.4 | 33.3 | 30.9 | 16.26 | 25.5 | 8.95  | 19.22 | 17.89  |
| 224903 | 'Safb'          | 36.89 | 47.99 | 37.2 | 34.1 | 43.8 | 41.47 | 56.9 | 34    | 40.48 | 47.55  |
| 224904 | '2410015M20Rik' | 233.7 | 242.2 | 220  | 276  | 224  | 344.9 | 248  | 188.4 | 221.6 | 228.64 |
| 224907 | 'Dus3l'         | 52.79 | 44.37 | 44   | 2.74 | 83.1 | 72.26 | 72.5 | 57.68 | 36.23 | 48.58  |
| 224912 | 'Crb3'          | 0     | 2.05  | 0    | 0    | 7.76 | 1.88  | 1.36 | 0     | 0.66  | 0      |
| 224916 | 'Vmn2r120'      | 0     | 0.02  | 0    | 0    | 0.02 | 0     | 0    | 0     | 0     | 0      |
| 224938 | 'Pja2'          | 160.6 | 151.9 | 142  | 98   | 141  | 78.35 | 137  | 167.7 | 168.5 | 182.44 |
| 224997 | 'Dlga1'         | 18.19 | 28.08 | 14.4 | 14.2 | 16.2 | 6.73  | 15.1 | 9.75  | 5.37  | 8.34   |
| 225010 | 'Lclat1'        | 10.34 | 3.81  | 5.62 | 0.54 | 3.64 | 1.47  | 6.37 | 5.4   | 7.81  | 2.77   |
| 225020 | 'Fez2'          | 20.97 | 34.43 | 34.3 | 58.9 | 26.6 | 21.87 | 44.9 | 22.82 | 14.48 | 19.05  |
| 225027 | 'Srsf7'         | 135.5 | 134.3 | 104  | 80.5 | 116  | 114.6 | 120  | 122.1 | 137   | 173.69 |
| 225028 | 'Map4k3'        | 4.42  | 4.28  | 1.23 | 0.01 | 1.03 | 0.37  | 3.39 | 4.8   | 0.51  | 3.2    |
| 225049 | 'Ttc7'          | 0.22  | 0     | 0.72 | 1.67 | 0.25 | 0.37  | 0.84 | 0     | 2.5   | 2.04   |
| 225055 | 'Fbxo11'        | 12.91 | 8.31  | 7.2  | 14.2 | 14.1 | 11    | 16.6 | 12.59 | 10.63 | 15.61  |
| 225115 | 'Svil'          | 0     | 0.35  | 0.44 | 0.96 | 0.02 | 0     | 0.79 | 1.45  | 0.72  | 0.17   |
| 225131 | 'Wac'           | 18.02 | 15.43 | 20.7 | 16.4 | 15.1 | 15.3  | 23.2 | 13.97 | 22.71 | 21.67  |
| 225160 | 'Thoc1'         | 15.94 | 20.05 | 25   | 13.5 | 15.2 | 16.07 | 4.59 | 17.68 | 13.47 | 22.2   |
| 225164 | 'Mib1'          | 3.21  | 3.21  | 2.76 | 4.76 | 2.85 | 1.79  | 1.06 | 3.86  | 3.04  | 2.54   |
| 225182 | 'Rbbp8'         | 1.5   | 1.35  | 0.67 | 1.96 | 0.06 | 1     | 2.9  | 1.7   | 2.03  | 1.67   |
| 225187 | 'Ankrd29'       | 2.04  | 0.2   | 11.5 | 1.86 | 0.82 | 7.65  | 4.07 | 5.03  | 6.97  | 3.68   |
| 225192 | 'Hrh4'          | 0     | 0     | 2.06 | 0    | 0    | 0     | 0    | 0     | 0.56  | 0      |
| 225207 | 'Zfp521'        | 3.9   | 2.94  | 0.15 | 0.02 | 7.76 | 2.5   | 11.7 | 0.2   | 2.63  | 9.29   |
| 225215 | 'Rsl24d1'       | 41.8  | 51.21 | 28.8 | 73.5 | 72.9 | 87.43 | 72.6 | 53.46 | 52.32 | 51.27  |
| 225266 | 'Klhl14'        | 0.06  | 0     | 2.3  | 0    | 0    | 0     | 0    | 0     | 0     | 1.91   |
| 225280 | 'Ino80c'        | 13.7  | 4.67  | 25.4 | 22.7 | 10.5 | 20.44 | 27.3 | 18.53 | 15.67 | 12.28  |
| 225283 | 'Rprd1a'        | 10.72 | 7.11  | 8.37 | 37.3 | 12.6 | 10.72 | 12.2 | 11.96 | 9.1   | 21.67  |
| 225288 | 'Fhod3'         | 1.46  | 0.57  | 1.45 | 5.63 | 0.55 | 0.18  | 3.06 | 0.65  | 0.47  | 0.27   |
| 225289 | 'AW554918'      | 1.01  | 0.03  | 1.61 | 0.21 | 0.01 | 2.63  | 0.03 | 1.18  | 2.49  | 0.77   |
| 225326 | 'Pik3c3'        | 14.91 | 15.6  | 10.5 | 13.8 | 15.1 | 11.3  | 16.1 | 12.66 | 16.77 | 19.74  |
| 225339 | 'Ammecr1l'      | 12    | 4.22  | 5.6  | 13.9 | 7.94 | 5.94  | 3.02 | 10.22 | 8.68  | 9.34   |
| 225341 | 'Lims2'         | 4.05  | 2.24  | 23.7 | 8.24 | 15.4 | 6.07  | 28.2 | 4.55  | 0     | 0.05   |
| 225348 | 'Wdr36'         | 13.38 | 13.47 | 13.4 | 3.77 | 5.38 | 9.68  | 12.7 | 21.47 | 5.5   | 19.89  |

|        |                 |       |       |      |      |      |       |      |       |       |        |
|--------|-----------------|-------|-------|------|------|------|-------|------|-------|-------|--------|
| 225358 | 'Fam13b'        | 20    | 10.73 | 17.4 | 11.1 | 6.89 | 13.82 | 25   | 10.7  | 28.16 | 16.13  |
| 225362 | 'Reep2'         | 104.1 | 117.1 | 116  | 48.3 | 133  | 93.51 | 95.5 | 106.9 | 68.14 | 83.09  |
| 225363 | 'Etf1'          | 11.9  | 17.42 | 13.1 | 21.7 | 14   | 17    | 7.96 | 13.46 | 24.72 | 14.57  |
| 225372 | 'Apbb3'         | 59.39 | 40.52 | 39.1 | 52.9 | 34.8 | 62.84 | 13   | 53.47 | 37.9  | 16.64  |
| 225392 | 'Rell2'         | 1.23  | 6.32  | 15.3 | 6.24 | 14.8 | 2.25  | 14.1 | 10.36 | 29.48 | 6.25   |
| 225432 | 'Rbm27'         | 3.14  | 4.3   | 3.6  | 9.08 | 3.7  | 5.35  | 4.72 | 3.93  | 6.49  | 5.12   |
| 225467 | 'Pgg1b'         | 2.49  | 10.03 | 3.55 | 2.36 | 0.47 | 7.06  | 1.83 | 5.45  | 3.7   | 2.14   |
| 225471 | 'Ticam2'        | 0     | 0     | 0    | 0    | 0    | 0     | 0    | 1.66  | 0     | 0      |
| 225523 | 'Cep120'        | 9.14  | 4.41  | 10.2 | 10.8 | 4.87 | 1.22  | 8.25 | 4.2   | 16.41 | 13.94  |
| 225583 | 'A730017C20Rik' | 345.5 | 344   | 228  | 305  | 202  | 419.1 | 248  | 331.2 | 309.9 | 381.34 |
| 225594 | 'Gm4841'        | 0     | 0.1   | 0.03 | 0.06 | 0.19 | 0.02  | 0.05 | 0.07  | 0.07  | 0.04   |
| 225600 | 'Pde6a'         | 0     | 0     | 0    | 0    | 0    | 0     | 0    | 0.37  | 0     | 0      |
| 225608 | 'Sh3tc2'        | 0     | 0     | 0    | 0    | 0.8  | 1     | 0    | 0     | 0     | 0      |
| 225631 | 'Onecut2'       | 0.14  | 0.13  | 0    | 0.07 | 1.91 | 1     | 1.07 | 0.27  | 0.86  | 0.93   |
| 225638 | 'Alpk2'         | 0.01  | 0     | 0.01 | 0    | 0    | 0     | 0.01 | 0.01  | 0.01  | 0.01   |
| 225642 | 'Grp'           | 14.62 | 0     | 4.64 | 0    | 9.38 | 67.09 | 2.53 | 0     | 0     | 54.95  |
| 225651 | 'Mppe1'         | 9.94  | 9.06  | 1.97 | 3.68 | 12.4 | 0.56  | 13   | 25.17 | 11.42 | 6.38   |
| 225655 | 'Preli3a'       | 24.16 | 42.48 | 19.6 | 14.8 | 40   | 31.95 | 44.7 | 71.18 | 31.59 | 18.98  |
| 225659 | 'Cep76'         | 4.06  | 0.93  | 2.11 | 0.01 | 0.28 | 1.27  | 0.58 | 0.12  | 0.14  | 0      |
| 225724 | 'Mapk4'         | 8.77  | 12.67 | 13.2 | 5.24 | 9.61 | 5.54  | 3.17 | 0.03  | 13.92 | 1.92   |
| 225742 | 'St8sia5'       | 3.83  | 11.42 | 10.3 | 10.1 | 6.91 | 5.79  | 6.17 | 1.07  | 4.59  | 4.87   |
| 225743 | 'Rnf165'        | 2.12  | 1.32  | 1.77 | 4.31 | 0.74 | 0.89  | 1.44 | 2.73  | 1.45  | 0.21   |
| 225745 | 'Haus1'         | 9.91  | 9.42  | 4.82 | 23.1 | 22.8 | 5.75  | 0.03 | 3.93  | 12.98 | 13.18  |
| 225791 | 'Zadh2'         | 3.72  | 4.72  | 0.23 | 7.98 | 3.75 | 0.04  | 0.04 | 0     | 7.28  | 0.02   |
| 225825 | 'Cd226'         | 0     | 0     | 0    | 0    | 0    | 0     | 0    | 0     | 0.12  | 0      |
| 225845 | 'Pla2g16'       | 8.68  | 20    | 8.46 | 0.09 | 1.38 | 25.84 | 27.1 | 8.2   | 4.97  | 3.05   |
| 225849 | 'Ppp2r5b'       | 35.91 | 43.74 | 86.9 | 13.3 | 37.8 | 30.26 | 43.9 | 52.59 | 77.95 | 23.27  |
| 225861 | 'Snx32'         | 101.2 | 109   | 102  | 116  | 175  | 191.8 | 172  | 115.4 | 105.2 | 101.47 |
| 225870 | 'Rin1'          | 0.64  | 3.74  | 0.28 | 1.38 | 2.05 | 0.38  | 0.07 | 0.04  | 0.22  | 4.04   |
| 225872 | 'Npas4'         | 15.07 | 15.19 | 44.7 | 13   | 6.7  | 28.34 | 4.5  | 24.14 | 12.22 | 40.44  |
| 225875 | 'Lrfn4'         | 0.21  | 1.34  | 0.15 | 1.03 | 1.3  | 0.4   | 1.64 | 0.76  | 2.46  | 0.03   |
| 225876 | 'Kdm2a'         | 3.95  | 8.51  | 5.81 | 14.4 | 6.23 | 3.45  | 4.45 | 4.59  | 7.05  | 10.43  |
| 225887 | 'Ndufs8'        | 288.8 | 250.2 | 353  | 292  | 417  | 567.2 | 303  | 377.6 | 353.7 | 272.26 |
| 225888 | 'Kmt5b'         | 5.31  | 4.38  | 3.22 | 3.04 | 3.87 | 1.22  | 3.44 | 1.8   | 7.66  | 2.68   |
| 22589  | 'Atrx'          | 8.59  | 15.52 | 12.7 | 18.9 | 13.1 | 14.25 | 11.4 | 14.53 | 12.52 | 10.52  |
| 225895 | 'Taf6l'         | 8.83  | 13.73 | 33   | 0    | 17.1 | 18.8  | 35.6 | 16.62 | 26.05 | 23.21  |
| 225896 | 'Ubxn1'         | 55.21 | 80.83 | 92   | 123  | 116  | 99.08 | 71.4 | 61.27 | 72.81 | 75.07  |
| 225898 | 'Eml3'          | 0.89  | 1.25  | 1.88 | 0    | 4.88 | 1.19  | 5.98 | 2.78  | 20.26 | 11.56  |
| 22590  | 'Xpa'           | 8.67  | 14.15 | 21.1 | 2.16 | 16.5 | 28.23 | 8.97 | 7.88  | 0.54  | 11.86  |
| 225908 | 'Myrf'          | 0.19  | 0.53  | 0.38 | 0    | 0.05 | 0.57  | 1.44 | 0     | 0     | 0.01   |
| 22591  | 'Xpc'           | 4.24  | 3.59  | 4.64 | 6.91 | 1.67 | 0.01  | 17.2 | 11.19 | 7.44  | 3.66   |
| 225912 | 'Cyb561a3'      | 9.11  | 11.44 | 1.15 | 0.39 | 10.2 | 19.57 | 1.26 | 3.42  | 10.12 | 3.83   |
| 225913 | 'Tkfc'          | 12.66 | 9.42  | 9.43 | 0.05 | 2.78 | 1.56  | 2.74 | 7.76  | 12.27 | 8.46   |
| 22592  | 'Ercc5'         | 6.49  | 4.71  | 11   | 1.75 | 4.9  | 4.03  | 2.34 | 4.9   | 10.62 | 2.73   |
| 225922 | 'Oosp2'         | 1.27  | 0     | 0    | 0    | 0    | 0     | 0    | 0     | 0     | 0      |
| 225929 | 'Pat1'          | 2.67  | 0.65  | 5.59 | 1.07 | 2.76 | 3.53  | 2.72 | 3.5   | 6.3   | 5.99   |
| 22594  | 'Xrcc1'         | 11.39 | 23.36 | 12.8 | 14.6 | 20.6 | 23.57 | 23.7 | 20.44 | 13.5  | 9.03   |
| 22596  | 'Xrcc5'         | 20.07 | 12.99 | 13.4 | 19.9 | 20.4 | 15.63 | 10.1 | 10.47 | 6.87  | 13.22  |
| 22598  | 'Slc6a18'       | 0.12  | 0.17  | 0.14 | 0.61 | 0.15 | 0.19  | 0.29 | 0.11  | 0.25  | 0.12   |
| 22599  | 'Slc6a20b'      | 0.04  | 0.04  | 0    | 0    | 0    | 0     | 0    | 0.02  | 1     | 0      |
| 225994 | 'Nmrk1'         | 9.1   | 19.81 | 14.2 | 25.9 | 19.1 | 29.44 | 33.6 | 8.15  | 18.86 | 11.92  |
| 225995 | 'D030056L22Rik' | 8.93  | 11.31 | 3.75 | 20.2 | 4.29 | 0.03  | 8.11 | 2.36  | 5.25  | 0      |
| 225997 | 'Trpm6'         | 0     | 1.17  | 0    | 2.07 | 0.3  | 0     | 0.7  | 0.76  | 0.63  | 0.82   |
| 225998 | 'Rorb'          | 15.97 | 10.89 | 4.76 | 10.2 | 0.7  | 4.32  | 0.61 | 8.75  | 13.87 | 7.55   |
| 22601  | 'Yap1'          | 0     | 2.45  | 0    | 0    | 0.02 | 0     | 0    | 0.98  | 0     | 0.58   |
| 226016 | 'Abhd17b'       | 0.64  | 4.31  | 1.99 | 9.55 | 4.95 | 0.02  | 2.03 | 0.19  | 1.6   | 1.85   |
| 226025 | 'Trpm3'         | 3.83  | 4.75  | 0.04 | 0.02 | 1.98 | 2.05  | 4.18 | 2.59  | 1.08  | 3.58   |
| 226026 | 'Smc5'          | 7.99  | 5.33  | 8.9  | 8.74 | 7.48 | 13.13 | 0.15 | 6.58  | 10.78 | 6.79   |

|        |            |       |       |      |      |      |       |      |       |       |        |
|--------|------------|-------|-------|------|------|------|-------|------|-------|-------|--------|
| 226040 | 'Tmem252'  | 0     | 0     | 1.48 | 0    | 0    | 0     | 0    | 0     | 0     | 0.02   |
| 226041 | 'Pgm5'     | 0.02  | 0     | 0.37 | 0    | 0    | 0     | 0.01 | 0     | 0.03  | 0      |
| 226043 | 'Cbwd1'    | 3.95  | 8.47  | 0.42 | 3.67 | 11.6 | 8.22  | 0.62 | 5.02  | 0.53  | 9.32   |
| 226075 | 'Glis3'    | 0     | 0.73  | 0    | 0    | 0    | 0.1   | 0    | 0     | 0     | 0.46   |
| 22608  | 'Ybx1'     | 15.55 | 14.36 | 11.5 | 57.2 | 12.2 | 8.11  | 13.2 | 6.48  | 11.71 | 5.11   |
| 226089 | 'Ric1'     | 0     | 0     | 1.97 | 0    | 0    | 0     | 0    | 1.04  | 0     | 0.23   |
| 226090 | 'Ermp1'    | 6.61  | 2.59  | 2.13 | 1.71 | 1.13 | 1.22  | 5.4  | 2.49  | 3.16  | 0.7    |
| 226098 | 'Hectd2'   | 0     | 0     | 1.26 | 1.68 | 0.01 | 0.79  | 0.44 | 0.89  | 1.98  | 1      |
| 226101 | 'Myof'     | 1.02  | 0     | 0    | 0    | 0    | 0.74  | 0    | 0     | 0     | 0      |
| 226115 | 'Opalin'   | 11.46 | 5.96  | 0    | 0    | 5.93 | 66.48 | 0.06 | 19.35 | 0     | 0      |
| 22612  | 'Yes1'     | 2.66  | 0.37  | 0.01 | 1.59 | 2.61 | 0.01  | 0    | 0.21  | 0.21  | 0      |
| 226122 | 'Ubd1'     | 3.1   | 0     | 5.48 | 11.8 | 0.03 | 0     | 3.55 | 2.37  | 6.19  | 3.33   |
| 226123 | 'Morn4'    | 94.02 | 84.19 | 86   | 102  | 99.7 | 112.1 | 79.9 | 112.9 | 78.8  | 106.2  |
| 226139 | 'Cox15'    | 14.44 | 11.08 | 9.16 | 5.93 | 5.63 | 1.63  | 6.05 | 9.05  | 8.56  | 6.23   |
| 226143 | 'Cyp2c23'  | 0     | 0     | 0    | 0    | 0    | 0     | 0    | 0.57  | 0     | 0      |
| 226144 | 'Erlin1'   | 6.15  | 2.61  | 1.64 | 9.2  | 2.76 | 4.21  | 2.2  | 1.81  | 4.44  | 6.64   |
| 226151 | 'Slf2'     | 14.89 | 13.5  | 17.8 | 14   | 11   | 21.28 | 7.94 | 9.24  | 16.08 | 23.52  |
| 226153 | 'Twink'    | 7.29  | 2.59  | 2.23 | 19.7 | 3.82 | 2.45  | 2.3  | 10.55 | 5.94  | 7.39   |
| 226154 | 'Lzts2'    | 1.62  | 2.37  | 9    | 6.11 | 7.82 | 0.54  | 5.36 | 2.04  | 8.14  | 0.03   |
| 226162 | 'Dpcd'     | 207.1 | 174.9 | 179  | 224  | 159  | 262.5 | 141  | 170.6 | 185.3 | 234.16 |
| 226169 | 'Pprc1'    | 4.32  | 2.82  | 2.18 | 8.56 | 0.66 | 0.78  | 6.02 | 4.22  | 3.23  | 1.1    |
| 226178 | 'Wbp11'    | 6.19  | 8.34  | 4.31 | 0    | 12.6 | 1.14  | 0.05 | 8.7   | 15.61 | 7.11   |
| 226180 | 'Ina'      | 42.16 | 56.47 | 35.6 | 66.5 | 39.9 | 58.18 | 94.1 | 48.39 | 36.45 | 37.11  |
| 226182 | 'Taf5'     | 0.07  | 0.06  | 0.07 | 0    | 0.78 | 0.22  | 0.64 | 0.88  | 0     | 0.96   |
| 22619  | 'Siae'     | 10.06 | 5.14  | 4.18 | 7.14 | 6.22 | 8.68  | 8.12 | 11.28 | 22.32 | 7.81   |
| 22625  | 'Map3k19'  | 1.27  | 1.6   | 0.25 | 5.19 | 0.25 | 1.33  | 0.46 | 0.08  | 0.96  | 0.11   |
| 226250 | 'Afp112'   | 0     | 1.98  | 0.54 | 4.17 | 0.02 | 0     | 8    | 1.86  | 0     | 0.02   |
| 226251 | 'Ablim1'   | 3.11  | 3.66  | 7.08 | 3.87 | 7.31 | 6.41  | 9.99 | 7.48  | 3.31  | 1.61   |
| 226252 | 'Fam160b1' | 0.01  | 0.46  | 0.95 | 5.67 | 6.34 | 1.04  | 0    | 1.4   | 1.04  | 3.82   |
| 226255 | 'Atrn1'    | 1.42  | 0.54  | 0.9  | 0    | 0.02 | 0     | 1.01 | 0.99  | 0.04  | 0      |
| 22626  | 'Slc23a3'  | 0.01  | 0     | 0    | 0    | 0    | 0     | 0    | 0     | 0     | 0      |
| 226265 | 'Eno4'     | 0.56  | 4.58  | 2.39 | 3.03 | 9.3  | 1.94  | 2.31 | 1.57  | 1.63  | 0.87   |
| 22627  | 'Ywhae'    | 455.6 | 555.6 | 418  | 394  | 540  | 494.9 | 525  | 525   | 552.1 | 673.75 |
| 226278 | 'Prhr'     | 0     | 2.19  | 0    | 0    | 0    | 0     | 0.03 | 1.01  | 3.81  | 0      |
| 22628  | 'Ywhag'    | 190   | 172.8 | 196  | 107  | 122  | 62.71 | 193  | 172.6 | 225.9 | 137.22 |
| 22629  | 'Ywhah'    | 715.2 | 601.2 | 520  | 811  | 579  | 684.3 | 578  | 598.8 | 720.1 | 475.9  |
| 22630  | 'Ywhaq'    | 631.8 | 672   | 532  | 583  | 655  | 698.2 | 504  | 691.8 | 635.2 | 659.96 |
| 226304 | 'Npbwr1'   | 1.72  | 3.51  | 3.53 | 4.18 | 0.01 | 0     | 0    | 2.69  | 7.81  | 0      |
| 22631  | 'Ywhaz'    | 593.6 | 644.4 | 503  | 410  | 579  | 446.1 | 500  | 620   | 537.2 | 644.33 |
| 22632  | 'Yy1'      | 1.78  | 3.81  | 3.67 | 10.5 | 3.06 | 0.77  | 0    | 1.93  | 1.03  | 3.86   |
| 22634  | 'Plagl1'   | 3.66  | 3.29  | 1.79 | 7.58 | 3.95 | 1.82  | 3.11 | 3.33  | 4.22  | 8.39   |
| 22635  | 'Zan'      | 0     | 0     | 1.11 | 0    | 0    | 0     | 0    | 0.68  | 0     | 0      |
| 226351 | 'Tmem185b' | 11.29 | 23.07 | 11.9 | 2.12 | 6.8  | 14.6  | 4.95 | 17.04 | 0.9   | 16.1   |
| 226352 | 'Epb4115'  | 5.09  | 2.19  | 2.94 | 5.65 | 3.91 | 0.54  | 2.23 | 3.35  | 5.93  | 6.79   |
| 226356 | 'Cfap221'  | 0     | 0     | 0    | 0    | 0    | 0     | 0    | 0     | 0     | 0.01   |
| 226359 | 'C1ql2'    | 11.27 | 0     | 187  | 266  | 0.05 | 0.05  | 15.3 | 26.23 | 0     | 14.32  |
| 22637  | 'Zap70'    | 0.74  | 9.21  | 0    | 0    | 6.63 | 9.03  | 9.03 | 3.23  | 3.45  | 7.46   |
| 22640  | 'Zfp1'     | 10.42 | 7.21  | 6.68 | 5.69 | 3.96 | 6.52  | 5.27 | 10.9  | 5.11  | 13.01  |
| 226407 | 'Rab3gap1' | 30.55 | 37.05 | 20.7 | 14.4 | 26.9 | 9.7   | 33.3 | 21.97 | 44.84 | 45.9   |
| 226409 | 'Zranb3'   | 0.27  | 0.57  | 1.05 | 4.55 | 3.64 | 8.06  | 0.12 | 4.91  | 1.94  | 1.94   |
| 226412 | 'R3hdm1'   | 18.99 | 21.41 | 19.1 | 27.2 | 29.1 | 22.67 | 32.7 | 18.08 | 21.13 | 28.72  |
| 226414 | 'Dars'     | 72.73 | 61.43 | 34.2 | 42   | 35.4 | 21.36 | 50.4 | 65.57 | 37.95 | 53.78  |
| 226418 | 'Yod1'     | 4.34  | 3.34  | 1.17 | 3.3  | 1.98 | 0.04  | 2.84 | 1.47  | 0     | 0      |
| 226419 | 'Dyrk3'    | 2.55  | 3.05  | 3.92 | 47   | 0    | 0     | 0    | 0     | 3.2   | 0.94   |
| 22642  | 'Zbtb17'   | 3.9   | 9.79  | 9.62 | 15.8 | 6.24 | 8.44  | 4.41 | 10.33 | 11.07 | 4.11   |
| 226421 | 'Rab7b'    | 0     | 0     | 0    | 0    | 1.56 | 0     | 0    | 0     | 0     | 0      |
| 226422 | 'Rab29'    | 4.15  | 5.24  | 7.26 | 0    | 9.51 | 0     | 5.96 | 5.16  | 0     | 0      |
| 22643  | 'Zfp101'   | 0.02  | 0.94  | 1.8  | 0    | 0.13 | 0     | 0    | 2.7   | 0.9   | 1.61   |

|        |                 |       |       |      |      |      |       |      |       |       |        |
|--------|-----------------|-------|-------|------|------|------|-------|------|-------|-------|--------|
| 226432 | 'Ipo9'          | 21.43 | 26.03 | 42.4 | 8.11 | 24.6 | 9.4   | 29.4 | 33.33 | 40.69 | 27.33  |
| 226438 | 'Igf1'          | 0     | 0     | 0.02 | 0    | 0    | 0     | 0    | 0     | 0     | 0      |
| 226439 | 'Ascl5'         | 0     | 0.09  | 0    | 0    | 1.42 | 0     | 0    | 0     | 0     | 0      |
| 22644  | 'Rnf103'        | 6.37  | 7.15  | 2.89 | 9.86 | 4    | 4.37  | 0.77 | 1.56  | 3.23  | 2.31   |
| 226442 | 'Zfp281'        | 2.67  | 3.28  | 8.5  | 7.27 | 4.15 | 1.9   | 8.61 | 4.57  | 5.24  | 0.05   |
| 22646  | 'Zfp105'        | 6.32  | 8.64  | 16.9 | 2.35 | 0.34 | 32.52 | 0.05 | 5.41  | 2.44  | 7.02   |
| 226470 | 'Zbtb41'        | 1.76  | 0     | 0.01 | 0    | 0.33 | 0.08  | 0.13 | 0.39  | 1.22  | 0.24   |
| 22648  | 'Zfp11'         | 1.76  | 1.76  | 0.17 | 0.29 | 3.14 | 0.1   | 2.68 | 1.87  | 3.71  | 2.76   |
| 226499 | 'Odr4'          | 19.69 | 14.55 | 18.2 | 8.72 | 19.1 | 14.69 | 10.2 | 13.21 | 22.42 | 18.43  |
| 226517 | 'Smg7'          | 4.51  | 4.34  | 11.9 | 7.35 | 4.3  | 4.16  | 9.75 | 3.56  | 9.27  | 4.74   |
| 226518 | 'Nmnat2'        | 31.35 | 35.24 | 40.9 | 13.2 | 29.5 | 30.34 | 41.8 | 40.4  | 66.99 | 28.77  |
| 226519 | 'Lamc1'         | 0     | 0     | 0.72 | 1.84 | 0.03 | 0     | 0.12 | 0     | 1.39  | 0.5    |
| 226525 | 'Rasal2'        | 1.9   | 0.98  | 2.18 | 3.85 | 5.23 | 1.74  | 1.01 | 3.19  | 2.28  | 3.03   |
| 226527 | 'Cryz12'        | 3.74  | 2.27  | 3.37 | 21.5 | 1.18 | 10.22 | 20.8 | 2.47  | 1.15  | 3.92   |
| 226539 | 'Dars2'         | 10.25 | 3.92  | 7.2  | 0.02 | 1.38 | 2.23  | 8.08 | 4.62  | 8.36  | 10.07  |
| 22654  | 'Zfp13'         | 14.32 | 11.97 | 9.84 | 0    | 2.73 | 1.6   | 0    | 15.96 | 14.24 | 12.22  |
| 226541 | 'Klhl20'        | 3.15  | 4.74  | 3.65 | 3.44 | 0.84 | 1.57  | 4.68 | 4.79  | 0     | 3.96   |
| 226548 | 'Aph1a'         | 26.56 | 14.03 | 10.1 | 0.08 | 10.3 | 25.96 | 15.9 | 20.68 | 14.88 | 6.49   |
| 226551 | 'Suco'          | 2.5   | 4.53  | 7.24 | 8.17 | 2.95 | 4.01  | 6.45 | 0.43  | 5.85  | 2.73   |
| 226562 | 'Prrc2c'        | 23.63 | 23.73 | 19.4 | 45.2 | 19   | 24.15 | 12.8 | 22.35 | 15.03 | 30.68  |
| 226564 | 'Fmo4'          | 0     | 0     | 0    | 0    | 2.02 | 0     | 0    | 0     | 0     | 0      |
| 22658  | 'Pcgf2'         | 0.9   | 2.38  | 3.02 | 2.89 | 2.88 | 0.14  | 2.51 | 0.89  | 2.91  | 1.68   |
| 226591 | 'Tipr1'         | 70.09 | 90.1  | 74.1 | 84   | 61.7 | 90.16 | 61.1 | 91.97 | 50.45 | 49.88  |
| 226594 | 'Rcsd1'         | 0     | 0     | 0    | 0    | 0    | 0     | 0    | 0     | 0.76  | 0      |
| 226601 | 'Gm4846'        | 0     | 0     | 0    | 0    | 0    | 0     | 0    | 0     | 0.02  | 0      |
| 22661  | 'Zfp148'        | 11.73 | 12.61 | 5.49 | 7.2  | 12.6 | 6.53  | 15.4 | 12.09 | 10.6  | 12.42  |
| 226610 | 'Fam78b'        | 0     | 0     | 3.36 | 2.56 | 1.39 | 0     | 0.38 | 0.61  | 0     | 0.08   |
| 226641 | 'Atf6'          | 0.97  | 1.76  | 4.67 | 6.8  | 4.26 | 2.42  | 1.04 | 2.68  | 1.79  | 2.88   |
| 226646 | 'Ndufs2'        | 224.1 | 154.6 | 196  | 197  | 203  | 248.3 | 265  | 197.3 | 189.3 | 175.57 |
| 226652 | 'Arhgap30'      | 0     | 0     | 0    | 3.59 | 0    | 0     | 0    | 0     | 0     | 0.27   |
| 226654 | 'Tstd1'         | 0.89  | 0     | 0.57 | 2.41 | 117  | 0     | 0.2  | 1.2   | 0.95  | 3.26   |
| 22666  | 'Zbtb14'        | 8.48  | 8.2   | 10.5 | 5.69 | 6.39 | 4.7   | 3.99 | 6.3   | 12.66 | 13.52  |
| 22668  | 'Sf1'           | 20.86 | 31.19 | 27.6 | 14.1 | 23.2 | 27.21 | 25.5 | 20.74 | 43.38 | 30.27  |
| 22670  | 'Trim26'        | 13.57 | 7.9   | 5.78 | 14.7 | 20.4 | 11.27 | 19.3 | 14.88 | 16.55 | 8.43   |
| 22671  | 'Rnf112'        | 21.07 | 43.63 | 66.4 | 10.3 | 27.1 | 16.34 | 42.2 | 24.27 | 29.48 | 15.26  |
| 226744 | 'Cnst'          | 7.05  | 6.74  | 6.09 | 1.88 | 1.56 | 4.21  | 6.37 | 10.63 | 8.32  | 1.29   |
| 226747 | 'Ahctf1'        | 2.11  | 0.75  | 1.66 | 4.37 | 3.33 | 0.59  | 1.98 | 1.61  | 1.02  | 1.95   |
| 226751 | 'Cdc42bpa'      | 5.35  | 5.39  | 5.02 | 14.1 | 11.3 | 6.64  | 11.5 | 7.39  | 5.57  | 8.63   |
| 226757 | 'Wdr26'         | 2.43  | 4.45  | 3.73 | 5.4  | 2.78 | 4.04  | 3.84 | 2.46  | 2.05  | 2.29   |
| 226777 | 'C130074G19Rik' | 1.09  | 0     | 0    | 0    | 0.6  | 0     | 0    | 0.25  | 0     | 0      |
| 226778 | 'Mark1'         | 4.91  | 1.71  | 5.54 | 3.55 | 4.93 | 3.37  | 1.61 | 2.43  | 5.71  | 4.52   |
| 22678  | 'Zfp2'          | 10.71 | 6.85  | 6.75 | 3.07 | 12.8 | 5.87  | 15.7 | 14.02 | 9.56  | 11.94  |
| 226781 | 'Slc30a10'      | 4.23  | 4.04  | 2.81 | 0.48 | 2.09 | 4.81  | 1.38 | 1.73  | 2.07  | 3.41   |
| 226791 | 'Lyp1a1'        | 12.38 | 9.3   | 12.5 | 0    | 12.9 | 22.32 | 18.2 | 14.7  | 4.04  | 2.98   |
| 22680  | 'Zfp207'        | 90.98 | 69.59 | 41.5 | 40.7 | 56.6 | 86.23 | 66   | 64.88 | 69.85 | 80.48  |
| 22682  | 'Zfand5'        | 17.41 | 19.54 | 8.89 | 47.6 | 15.8 | 15.4  | 6.49 | 8.33  | 12.96 | 6.74   |
| 226823 | 'Kctd3'         | 2.29  | 11.36 | 7.07 | 36.7 | 11.8 | 0.1   | 0.92 | 4.8   | 0.47  | 6.73   |
| 226830 | 'Smyd2'         | 73.15 | 74.88 | 91.4 | 104  | 87.8 | 77.39 | 67.2 | 86.41 | 89.97 | 50.52  |
| 226841 | 'Vash2'         | 0     | 1.07  | 0.05 | 8.82 | 1.44 | 4.14  | 1.37 | 2.39  | 0     | 1.16   |
| 226844 | 'Flvcr1'        | 0.01  | 2.31  | 0.06 | 7.65 | 1.02 | 0.49  | 3.94 | 0.5   | 0     | 0.98   |
| 226849 | 'Ppp2r5a'       | 2.44  | 0.12  | 0.02 | 0.39 | 0.99 | 0.01  | 2.33 | 0.12  | 1.97  | 2.96   |
| 22685  | 'Zfp239'        | 19.08 | 19.07 | 14.2 | 5.48 | 17.8 | 18.47 | 15.6 | 18.53 | 14.11 | 10.81  |
| 226856 | 'Lpgat1'        | 5.63  | 7.1   | 7.03 | 2.01 | 7.12 | 8.88  | 2.04 | 3.14  | 3.24  | 4.46   |
| 226861 | 'Hhat'          | 1.65  | 2.45  | 2.71 | 0    | 3.15 | 6.7   | 5.13 | 1.23  | 0.12  | 0.86   |
| 226866 | 'Sbspon'        | 0     | 1.41  | 0    | 0    | 2.49 | 0     | 0    | 0     | 1.47  | 0.22   |
| 22687  | 'Zpr1'          | 25.11 | 23.7  | 33.6 | 24.6 | 15.4 | 30.65 | 23.7 | 26.69 | 21.67 | 18.23  |
| 22688  | 'Zfp26'         | 1.74  | 0.41  | 2.07 | 7.39 | 0.54 | 0.14  | 2.33 | 0.87  | 1.09  | 0.53   |
| 22689  | 'Zfp27'         | 1.99  | 0.01  | 1.29 | 10   | 1.79 | 0.86  | 0.31 | 2.83  | 0.46  | 5.16   |

|        |            |       |       |      |      |      |       |      |       |       |        |
|--------|------------|-------|-------|------|------|------|-------|------|-------|-------|--------|
| 22690  | 'Zfp28'    | 9.55  | 2.72  | 6.52 | 11.1 | 9.07 | 10.18 | 4.94 | 9.95  | 12.89 | 4.67   |
| 22691  | 'Zscan2'   | 0.02  | 0.28  | 0.61 | 0.1  | 0.13 | 0.01  | 0.02 | 0.19  | 0.01  | 0.22   |
| 226922 | 'Kcnq5'    | 0     | 0.21  | 2.46 | 0    | 1.71 | 0     | 3.11 | 0.01  | 1.88  | 0.49   |
| 22693  | 'Zfp30'    | 1.97  | 0.48  | 9.91 | 13.3 | 8.84 | 6.26  | 8.65 | 14.31 | 10.93 | 8.75   |
| 22694  | 'Zfp35'    | 11.75 | 10.04 | 8.17 | 17.5 | 13.9 | 0.52  | 1.57 | 26.86 | 3.87  | 6.82   |
| 22695  | 'Zfp36'    | 29.07 | 39.13 | 5.07 | 29.1 | 12.6 | 133.1 | 0    | 0     | 3.33  | 1.41   |
| 22696  | 'Zfp37'    | 5.1   | 8.4   | 4.18 | 17.7 | 5.65 | 4.85  | 8.25 | 9.13  | 2.89  | 8.37   |
| 22697  | 'Zscan21'  | 12.48 | 16.26 | 0.85 | 9.06 | 18   | 11.32 | 21.7 | 11.6  | 32.39 | 16.17  |
| 226970 | 'Arhgef4'  | 122.6 | 64.42 | 81.4 | 41.8 | 69.7 | 75.52 | 117  | 115.8 | 90.38 | 106.79 |
| 226971 | 'Plekhb2'  | 256   | 204.2 | 224  | 125  | 188  | 168.1 | 226  | 268.9 | 299.7 | 301.15 |
| 226976 | 'Kansl3'   | 17.97 | 9.45  | 21.1 | 10.2 | 14.4 | 9.39  | 25.5 | 15.68 | 37.58 | 13.96  |
| 226977 | 'Actr1b'   | 121.5 | 125.4 | 144  | 99.8 | 141  | 121.7 | 202  | 167.6 | 72.43 | 134.85 |
| 22698  | 'Zfp39'    | 1.04  | 4.48  | 3.65 | 0    | 0.56 | 0.07  | 4.63 | 2.4   | 3.71  | 0.02   |
| 226982 | 'Eif5b'    | 11.81 | 7.69  | 6.58 | 12.8 | 9.56 | 9.54  | 7.07 | 7.19  | 5.28  | 6.35   |
| 226999 | 'Slc9a2'   | 0     | 0     | 0    | 0.03 | 0    | 0     | 0    | 0     | 0     | 0      |
| 22700  | 'Zfp40'    | 1.93  | 4.18  | 3.36 | 2.16 | 2.82 | 3.41  | 5.48 | 5.08  | 5.19  | 3.76   |
| 22701  | 'Zfp41'    | 0.97  | 4.35  | 2.49 | 6.28 | 3.26 | 0.01  | 0.77 | 2.78  | 3.37  | 2.71   |
| 22704  | 'Zfp46'    | 2.97  | 3.46  | 8.7  | 3.86 | 3.94 | 0.01  | 6.84 | 6.11  | 8.05  | 4.13   |
| 227058 | 'Dnah7b'   | 0.47  | 0.65  | 0.37 | 0.15 | 1.16 | 0.1   | 1.63 | 0     | 0.8   | 0.02   |
| 227059 | 'Slc39a10' | 8.48  | 9.12  | 17.7 | 0.24 | 12.4 | 6.61  | 19.1 | 11.62 | 15.74 | 24.44  |
| 22709  | 'Zfp51'    | 0.47  | 7.65  | 0.19 | 5.67 | 2.1  | 6.47  | 1.01 | 4.12  | 6.67  | 4.32   |
| 227094 | 'Nemp2'    | 0     | 0.01  | 3.72 | 0    | 0.01 | 0.31  | 0    | 0.5   | 2.42  | 0      |
| 227095 | 'Hibch'    | 10.77 | 13.81 | 7.75 | 46.1 | 23.3 | 20.57 | 27.3 | 16.08 | 21.9  | 8.97   |
| 227099 | 'Pms1'     | 0.13  | 3.48  | 2.11 | 0    | 0.1  | 3.61  | 0    | 1.23  | 1.32  | 5.21   |
| 22710  | 'Zfp52'    | 1.79  | 6.61  | 3.87 | 6.45 | 0.91 | 3.16  | 2.99 | 3.22  | 2.85  | 3.79   |
| 227102 | 'Ormdl1'   | 34.48 | 31.08 | 28.3 | 47.3 | 32.6 | 59.71 | 12.9 | 21.51 | 40.01 | 36.13  |
| 22712  | 'Zfp54'    | 2.3   | 0.49  | 2.89 | 0    | 0.02 | 3.31  | 0    | 1.74  | 3.33  | 4.71   |
| 227120 | 'Plcl1'    | 5.31  | 0.47  | 2.33 | 0.72 | 1.57 | 0.48  | 1.08 | 2.29  | 1     | 0.99   |
| 22715  | 'Zfp57'    | 8.52  | 8.43  | 20   | 9.72 | 5.16 | 7.47  | 17.7 | 33.1  | 16.45 | 15.16  |
| 227154 | 'Stradb'   | 16.39 | 15.6  | 4.2  | 0    | 17.8 | 19.44 | 18.9 | 25.83 | 9.79  | 7.34   |
| 227157 | 'Mpp4'     | 0     | 0     | 0.02 | 0    | 0    | 0     | 0.09 | 0.03  | 0     | 0.42   |
| 22717  | 'Zfp59'    | 1.55  | 2.24  | 1.74 | 0.03 | 0.03 | 0     | 3.65 | 2.39  | 0.86  | 1.27   |
| 22718  | 'Zfp60'    | 15.74 | 11.7  | 12.5 | 13.8 | 12.6 | 8.06  | 20.3 | 15.89 | 14.93 | 9.56   |
| 22719  | 'Zfp61'    | 19.88 | 16.39 | 11.3 | 34.3 | 5.42 | 14.17 | 16.5 | 17.74 | 16.28 | 8.73   |
| 227195 | 'Ino80d'   | 1.01  | 0     | 0.86 | 0.05 | 0.08 | 3.25  | 5.11 | 1.27  | 2.39  | 3.15   |
| 227197 | 'Ndufs1'   | 100.8 | 94.95 | 104  | 163  | 71.5 | 81.88 | 149  | 101.5 | 82.85 | 109.15 |
| 22720  | 'Zfp62'    | 8.31  | 5.85  | 9.56 | 9.88 | 1.18 | 1.98  | 4.02 | 4.38  | 3.79  | 4.87   |
| 227210 | 'Ccnyl1'   | 0     | 0     | 0.03 | 0    | 0    | 0     | 0    | 2.1   | 4.26  | 0      |
| 22722  | 'Zfp64'    | 5.32  | 9.2   | 5.53 | 0    | 12.2 | 1.76  | 6.62 | 10.74 | 7.88  | 5.45   |
| 227231 | 'Cps1'     | 0     | 0     | 0    | 0    | 0    | 2     | 0    | 0     | 0     | 0.02   |
| 22724  | 'Zbtb7b'   | 0.12  | 0.08  | 0    | 0    | 2.6  | 0.04  | 0    | 0.42  | 0.02  | 0      |
| 227289 | 'Gpbar1'   | 0     | 0     | 0    | 0    | 0    | 0     | 0    | 0     | 0     | 1.57   |
| 227290 | 'Aamp'     | 266.7 | 305.8 | 188  | 275  | 239  | 365.4 | 275  | 331.9 | 296.8 | 291.17 |
| 227292 | 'Ctdsp1'   | 4.69  | 2.75  | 3.46 | 8.91 | 4.49 | 4.42  | 0.02 | 0.01  | 0.02  | 2.5    |
| 227298 | 'Retreg2'  | 43.95 | 19.71 | 16.2 | 53.3 | 41.8 | 36.78 | 54   | 47.9  | 27.41 | 24.13  |
| 227325 | 'Dner'     | 168.4 | 215.7 | 156  | 132  | 92.9 | 84.22 | 93.2 | 158.7 | 147.8 | 149.12 |
| 227326 | 'Gpr55'    | 1.64  | 4.36  | 0.72 | 3.36 | 0.87 | 0     | 0    | 0.38  | 3.17  | 0      |
| 227327 | 'B3gnt7'   | 2.82  | 3.29  | 0.35 | 1.37 | 6.02 | 0.21  | 5.79 | 2.82  | 4.99  | 2.71   |
| 227331 | 'Gigyf2'   | 8.36  | 6.83  | 8.19 | 6.48 | 5.43 | 2.22  | 7.16 | 3.73  | 5.76  | 5.94   |
| 227333 | 'Dgkd'     | 3.83  | 1.49  | 7.66 | 10.2 | 2.97 | 2.46  | 4.91 | 2.43  | 0.58  | 5.1    |
| 227334 | 'Usp40'    | 1.91  | 0.76  | 3.03 | 3.74 | 2.24 | 2.06  | 0.71 | 5.25  | 3.65  | 4.25   |
| 227357 | 'Espnl'    | 0     | 0     | 0    | 0    | 0    | 0.01  | 0.03 | 0     | 0     | 0      |
| 227358 | 'Erfe'     | 0     | 0     | 0    | 0    | 0    | 0     | 0    | 0     | 4.65  | 0      |
| 227377 | 'Farp2'    | 0.76  | 0.17  | 5.39 | 0.77 | 1.74 | 0.24  | 0    | 1.7   | 7.5   | 3.35   |
| 227394 | 'Slco4c1'  | 0.66  | 0.24  | 0    | 0    | 1.16 | 2.94  | 0    | 0.15  | 0.07  | 0.02   |
| 227399 | 'Ppip5k2'  | 9.47  | 3.58  | 8.72 | 11.1 | 5.89 | 2.35  | 2.32 | 7.26  | 7.3   | 10.18  |
| 227446 | 'Relch'    | 9.07  | 9.65  | 12   | 13.7 | 12.3 | 1.63  | 12.7 | 3.37  | 8.95  | 5.58   |
| 227449 | 'Zcchc2'   | 1.03  | 0.17  | 0.22 | 6.26 | 0.01 | 0.02  | 1.08 | 0.96  | 4.35  | 1.1    |

|        |            |       |       |      |      |      |       |      |       |       |        |
|--------|------------|-------|-------|------|------|------|-------|------|-------|-------|--------|
| 22746  | 'Zfp85'    | 0     | 0     | 0    | 0    | 2.79 | 0     | 0    | 3.94  | 4.51  | 1.75   |
| 227485 | 'Cdh19'    | 0     | 0     | 0    | 2.27 | 0.01 | 0     | 2.13 | 0.32  | 0     | 0      |
| 22750  | 'Zfp9'     | 6.62  | 1.69  | 9.1  | 10.2 | 5.52 | 4.95  | 12.8 | 1.62  | 4.92  | 3.04   |
| 22751  | 'Zfp90'    | 5.27  | 9.5   | 8.32 | 4.56 | 13.2 | 0.02  | 14   | 10.32 | 5.87  | 10.68  |
| 227522 | 'Rpp38'    | 73.24 | 74.03 | 73.9 | 67.8 | 101  | 145.3 | 87.2 | 126.6 | 100.7 | 103.57 |
| 227525 | 'Dclre1c'  | 7.64  | 9.34  | 13.6 | 25.6 | 11.2 | 14.38 | 11   | 9.74  | 21.19 | 11.39  |
| 227526 | 'Cdnf'     | 0     | 0     | 0.03 | 0.04 | 0    | 0.03  | 0.07 | 0     | 0.39  | 0.06   |
| 22754  | 'Zfp92'    | 11.84 | 6.51  | 3.66 | 1.39 | 6.02 | 0.35  | 2.86 | 8.97  | 7.57  | 3.92   |
| 227541 | 'Camk1d'   | 0.68  | 0.32  | 1.2  | 1.82 | 2.49 | 2.85  | 4.95 | 0.79  | 0.36  | 0.85   |
| 227545 | 'Proser2'  | 1.52  | 2.46  | 1.14 | 1.3  | 2.34 | 2.66  | 0.01 | 2.23  | 0.62  | 1.68   |
| 22755  | 'Zfp93'    | 0     | 2.12  | 0.11 | 0.01 | 3.18 | 0.7   | 1.19 | 4.32  | 2.44  | 1.3    |
| 22756  | 'Zfp94'    | 5.51  | 1.76  | 4.76 | 1.79 | 3.66 | 9.11  | 13.5 | 3.94  | 1.06  | 8.53   |
| 22757  | 'Zkscan5'  | 4.29  | 4.82  | 5.04 | 0    | 2.27 | 1.04  | 8.43 | 3.78  | 2.66  | 2.61   |
| 22758  | 'Zscan12'  | 1.41  | 0     | 0.94 | 0.16 | 1.32 | 0.45  | 0.07 | 0.11  | 0.01  | 1.23   |
| 227580 | 'C1ql3'    | 1.41  | 0     | 1.21 | 4.3  | 2    | 0.76  | 2.76 | 3.8   | 5.2   | 0.97   |
| 22759  | 'Zfp97'    | 2.93  | 2.26  | 0.06 | 0.04 | 10   | 4.85  | 4.11 | 0.56  | 1.62  | 1.33   |
| 22761  | 'Zfpm1'    | 0     | 0.17  | 0    | 0.01 | 0    | 0     | 0.24 | 0     | 1.64  | 0      |
| 227612 | 'Tor4a'    | 2.15  | 2.35  | 3.8  | 5.18 | 2.82 | 6.1   | 2.25 | 1.44  | 2.78  | 3.76   |
| 227613 | 'Tubb4b'   | 374.1 | 341.2 | 428  | 228  | 414  | 608.1 | 323  | 498.6 | 285.5 | 384.04 |
| 227615 | 'Tmem203'  | 7.83  | 13.31 | 8.45 | 7.05 | 19.6 | 17.09 | 7.19 | 9.91  | 19.49 | 12.65  |
| 227619 | 'Man1b1'   | 17.53 | 10.78 | 24   | 5.2  | 25   | 9.6   | 12.1 | 14.33 | 28.64 | 27.56  |
| 22762  | 'Zfpm2'    | 1.63  | 1.92  | 0.71 | 3.34 | 0.09 | 0.35  | 0.96 | 0.51  | 0     | 0      |
| 227620 | 'Uap1l1'   | 11.1  | 27.41 | 44.9 | 43.3 | 36.3 | 53.53 | 22.3 | 22.35 | 65.46 | 22.38  |
| 227622 | 'Paxx'     | 45.74 | 40.5  | 61.2 | 70.7 | 67.3 | 67.6  | 35.9 | 54.66 | 62.05 | 49.79  |
| 227624 | 'Rabl6'    | 18.7  | 21.87 | 46.7 | 29   | 24.5 | 16.21 | 25.1 | 16.42 | 22.31 | 13.55  |
| 22763  | 'Zfr'      | 93.77 | 87.83 | 66.7 | 70.6 | 68.4 | 44.29 | 83.4 | 60.15 | 106.5 | 88.73  |
| 227632 | 'Kcnt1'    | 2.96  | 5.17  | 8.89 | 5.54 | 7.23 | 10.13 | 18.1 | 3.69  | 8.68  | 4.85   |
| 227634 | 'Camsap1'  | 3.04  | 3.9   | 4.64 | 11.1 | 5.65 | 5.17  | 4.89 | 4.03  | 2.13  | 2.49   |
| 227638 | 'Qsox2'    | 9.91  | 12.25 | 30   | 16.3 | 6.67 | 6.96  | 0.41 | 5.96  | 12.43 | 1.96   |
| 22764  | 'Zfx'      | 1.36  | 0.09  | 0.54 | 0.78 | 1.15 | 1.65  | 2.64 | 0.93  | 0.98  | 2.8    |
| 227644 | 'Snapc4'   | 3.16  | 5.87  | 8.94 | 8.33 | 10.5 | 3.29  | 6.39 | 7.17  | 6.51  | 2.81   |
| 227648 | 'Sec16a'   | 1.34  | 2.09  | 11.2 | 4.91 | 3.59 | 1.91  | 6.43 | 1.37  | 6.82  | 4.25   |
| 227656 | 'Rexo4'    | 27.63 | 15.57 | 24.5 | 21.2 | 19.9 | 43.52 | 17.8 | 30.75 | 17.62 | 24.82  |
| 227659 | 'Slc2a6'   | 10.84 | 13.42 | 9.04 | 19.1 | 12.2 | 6.84  | 32.7 | 31.64 | 12.7  | 3.93   |
| 227671 | 'Gbg1'     | 0     | 2.68  | 0.87 | 1.48 | 0    | 0.02  | 1.67 | 2.08  | 0.51  | 1.33   |
| 227674 | 'Ddx31'    | 13.39 | 7.24  | 7.05 | 15.5 | 1.83 | 4.42  | 0.04 | 8.94  | 4.4   | 6.52   |
| 227682 | 'Trub2'    | 2.87  | 5.92  | 2.98 | 0.19 | 2.97 | 6.74  | 0.6  | 4.09  | 12.5  | 7.58   |
| 227683 | 'Coq4'     | 19.3  | 18.97 | 39.6 | 40.7 | 37.3 | 43.86 | 42.9 | 25.75 | 8.3   | 17.66  |
| 227693 | 'Zer1'     | 4.75  | 6.45  | 5.73 | 14.1 | 3.75 | 6.52  | 12.9 | 4.15  | 6.45  | 11.14  |
| 227695 | 'Spout1'   | 16.23 | 31.13 | 48.5 | 50.3 | 58.8 | 17.68 | 58.9 | 23.15 | 46.42 | 37.75  |
| 227696 | 'Phyhd1'   | 8.35  | 2.68  | 0    | 8.38 | 7.53 | 28.92 | 12.8 | 6.05  | 0.54  | 2.22   |
| 227697 | 'Dolk'     | 32.7  | 28.73 | 29.9 | 0.05 | 28.8 | 14.08 | 22.7 | 34.18 | 20.54 | 5.99   |
| 227699 | 'Nup188'   | 1.35  | 2.29  | 0.69 | 4.17 | 0.93 | 0.6   | 2.81 | 0.01  | 0.92  | 2.93   |
| 22770  | 'Zhx1'     | 14.53 | 9.78  | 12.6 | 14.2 | 6.84 | 8.24  | 7.32 | 13.25 | 7.15  | 11.12  |
| 227700 | 'Sh3glb2'  | 90.13 | 129.4 | 109  | 101  | 154  | 140.4 | 154  | 132.8 | 117   | 121.87 |
| 227707 | 'BC005624' | 125.6 | 117.3 | 67.9 | 149  | 127  | 169.1 | 74.8 | 146.4 | 105.4 | 149.46 |
| 22771  | 'Zic1'     | 4.35  | 5.16  | 5.23 | 2.04 | 6.08 | 12.71 | 17.2 | 1.16  | 9.11  | 7.16   |
| 227715 | 'Exosc2'   | 28.64 | 48.92 | 11   | 89.3 | 26.9 | 20.34 | 5.19 | 41.37 | 19.83 | 22.26  |
| 227717 | 'Qrfp'     | 0     | 0.33  | 0    | 0    | 0    | 0     | 0.36 | 0     | 0     | 0      |
| 22772  | 'Zic2'     | 0.28  | 0.43  | 0.37 | 0.02 | 1.88 | 0.05  | 0.18 | 0     | 0.01  | 3.55   |
| 227720 | 'Nup214'   | 8.03  | 6.3   | 6.87 | 3.33 | 4.63 | 5.13  | 3.14 | 2.67  | 5.32  | 2.78   |
| 227721 | 'Plpp7'    | 18.52 | 25.89 | 12.8 | 0.06 | 34.4 | 32.76 | 29.5 | 37.85 | 14.19 | 23.9   |
| 227723 | 'Prrc2b'   | 13.4  | 12.56 | 13.7 | 18.5 | 13.6 | 9.37  | 16.9 | 3.88  | 6.26  | 10.44  |
| 22773  | 'Zic3'     | 2.9   | 0.4   | 6.39 | 0    | 4.19 | 0.76  | 9.33 | 2.2   | 2.03  | 7.69   |
| 227731 | 'Slc25a25' | 31.26 | 29.81 | 72.2 | 25.5 | 27.9 | 19.82 | 43.4 | 27.73 | 24.82 | 18.2   |
| 227733 | 'Pip5kl1'  | 1.82  | 1.36  | 3.71 | 0    | 1.32 | 6.14  | 0.07 | 4.56  | 2.66  | 0      |
| 227736 | 'Cfap157'  | 0.21  | 0     | 0.93 | 0    | 0.51 | 0     | 0    | 0.05  | 0     | 0.31   |
| 227737 | 'Fam129b'  | 1.46  | 3.34  | 2.98 | 0    | 5.63 | 0     | 0    | 0.75  | 0     | 0.06   |





|        |                 |       |       |      |      |      |       |      |       |       |         |
|--------|-----------------|-------|-------|------|------|------|-------|------|-------|-------|---------|
| 228714 | 'Kat14'         | 6.43  | 2.12  | 2.13 | 8.79 | 6.5  | 0.06  | 1.79 | 4.75  | 7.12  | 4.19    |
| 228715 | 'Smim26'        | 73.11 | 53.42 | 54.4 | 85.7 | 43.1 | 112   | 51.9 | 43.25 | 48.5  | 43.14   |
| 228730 | 'Kiz'           | 9.63  | 16.45 | 7.2  | 21.1 | 19.2 | 32.73 | 52.8 | 16.98 | 7.74  | 13.12   |
| 228756 | 'Cstl1'         | 0     | 2.11  | 0    | 0    | 0    | 0     | 0    | 0     | 0     | 0       |
| 228765 | 'Sdcbp2'        | 2.93  | 0     | 1.54 | 0    | 0    | 0     | 0    | 0     | 0     | 0       |
| 228769 | 'Psmf1'         | 24.58 | 34.74 | 25.1 | 16.7 | 20.2 | 38.01 | 22.2 | 23.22 | 34.81 | 46.11   |
| 228770 | 'Rspo4'         | 1.2   | 0     | 0    | 0    | 0.13 | 0     | 0    | 0     | 0     | 0       |
| 228775 | 'Trib3'         | 0.47  | 0     | 0    | 0    | 0    | 0     | 0    | 0     | 0     | 0       |
| 228777 | 'Nrsn2'         | 757.8 | 920.5 | 857  | 863  | 632  | 854.7 | 824  | 892.7 | 894.2 | 1181.82 |
| 228778 | '6820408C15Rik' | 2.06  | 5.12  | 3.94 | 1.3  | 2.87 | 9.56  | 4.83 | 1.91  | 1.1   | 5.18    |
| 228787 | 'Xkr7'          | 0.4   | 0     | 0.94 | 0.7  | 0    | 0     | 0    | 0     | 0     | 0       |
| 228788 | 'Ccm2l'         | 0     | 1.19  | 0    | 0    | 0    | 0     | 0    | 0.31  | 0     | 0.17    |
| 228790 | 'Asxl1'         | 0.01  | 2.28  | 6.66 | 4.59 | 6.92 | 1.89  | 3    | 3.15  | 0.01  | 5.33    |
| 228801 | 'Bpifb1'        | 10.82 | 0     | 0.86 | 7.67 | 0    | 0     | 0    | 1.14  | 0     | 3.87    |
| 228802 | 'Bpifb5'        | 0     | 1.18  | 0    | 0    | 0    | 0     | 0    | 0     | 0     | 0       |
| 228807 | 'Zfp341'        | 0.52  | 0     | 1.11 | 5.05 | 1.42 | 0.02  | 2.3  | 0     | 0.33  | 0       |
| 228812 | 'Pigu'          | 53.13 | 32.61 | 43.5 | 0    | 39.8 | 58.75 | 42.7 | 59.01 | 60    | 54.87   |
| 228829 | 'Phf20'         | 23.79 | 14.54 | 17.9 | 29.3 | 27.7 | 14.52 | 21.9 | 19.93 | 13.84 | 19.55   |
| 228836 | 'Dlgap4'        | 22.21 | 24.19 | 21.1 | 32   | 20.7 | 15.41 | 27.4 | 14.41 | 14.45 | 7.76    |
| 228839 | 'Tgif2'         | 1.67  | 1.94  | 1.47 | 3.94 | 1.05 | 0.15  | 0    | 2.64  | 0.28  | 4.01    |
| 228846 | 'D630003M21Rik' | 0     | 1.37  | 0.04 | 0    | 0    | 2.51  | 0    | 0.01  | 0     | 0       |
| 228850 | 'Ralgapb'       | 1.56  | 2.68  | 1.28 | 2.33 | 3.44 | 1.68  | 0.22 | 1.13  | 1.67  | 4.12    |
| 228852 | 'Ppp1r16b'      | 20.64 | 17.27 | 13.1 | 20.8 | 26.7 | 29.89 | 12.6 | 13.99 | 13.18 | 14.46   |
| 228858 | 'Gdap11l1'      | 81.38 | 75.84 | 68.8 | 52.7 | 43.3 | 59.53 | 66.7 | 77.64 | 77.47 | 44.94   |
| 228859 | 'Fitm2'         | 11.32 | 10.47 | 16.6 | 9.74 | 2.36 | 14.51 | 11.2 | 15.66 | 14.23 | 3.17    |
| 228866 | 'Pcif1'         | 14.76 | 12.7  | 18.1 | 25.2 | 23.8 | 8.47  | 22.3 | 15.87 | 24.04 | 15.81   |
| 228869 | 'Ncoa5'         | 2.16  | 7.39  | 1.69 | 2.98 | 8.05 | 0.44  | 0.02 | 2.98  | 1.33  | 0.57    |
| 228875 | 'Slc35c2'       | 29.5  | 27.2  | 58.9 | 0    | 51.1 | 35.92 | 46.8 | 34.12 | 28.89 | 22.72   |
| 228876 | 'Zfp334'        | 0.99  | 1.39  | 3.67 | 6.12 | 0.2  | 1.13  | 3.21 | 1.79  | 0     | 3.97    |
| 228880 | 'Zmynd8'        | 31.85 | 51.21 | 41.4 | 67.5 | 52.4 | 39.47 | 16.8 | 31.47 | 62.26 | 66.89   |
| 228889 | 'Ddx27'         | 10.7  | 19.41 | 20.6 | 12.2 | 14   | 12.15 | 15.9 | 7.58  | 14.94 | 14.05   |
| 228911 | 'Tshz2'         | 7.47  | 9.04  | 8.25 | 10.6 | 9.12 | 8.51  | 16.3 | 8.42  | 12.32 | 6.31    |
| 228913 | 'Zfp217'        | 0     | 0     | 0    | 0    | 0.03 | 0     | 0    | 0.03  | 0     | 0.05    |
| 228942 | 'Cbln4'         | 12.25 | 3.7   | 17.3 | 12.3 | 26.5 | 24.72 | 72.2 | 11.29 | 5.74  | 23.43   |
| 228960 | 'Stx16'         | 6.52  | 8.32  | 14.4 | 13   | 21.4 | 12.22 | 5.45 | 15.01 | 31.62 | 10.25   |
| 228961 | 'Npepl1'        | 5.97  | 1.35  | 0    | 0.11 | 0    | 0.02  | 0.02 | 0     | 1.76  | 2.36    |
| 228966 | 'Ppp1r3d'       | 0     | 3.46  | 0    | 0    | 0    | 0     | 1.08 | 2.16  | 1.47  | 0       |
| 228980 | 'Taf4'          | 0.69  | 1.79  | 2.93 | 0    | 1.38 | 0     | 0.83 | 0.66  | 0     | 2.06    |
| 228983 | 'Osbp12'        | 27    | 55.61 | 45.6 | 43.1 | 54.4 | 32.06 | 8.58 | 33.91 | 40.58 | 49.37   |
| 228993 | 'Slc17a9'       | 0     | 0     | 0    | 0    | 0    | 3.64  | 0    | 0     | 0     | 0       |
| 228994 | 'Ythdf1'        | 1.44  | 1.6   | 3.14 | 4.23 | 3    | 3.67  | 0.14 | 2.85  | 2.07  | 0.6     |
| 228998 | 'Arfgap1'       | 57.88 | 34.48 | 39.4 | 56.1 | 69.5 | 59.08 | 87.9 | 61.59 | 65.48 | 42.18   |
| 229003 | 'Helz2'         | 0     | 0     | 0    | 0    | 0    | 0     | 0    | 0     | 0     | 0.84    |
| 229004 | 'Gmeb2'         | 2.08  | 2.91  | 0    | 0    | 0.4  | 1.6   | 0.01 | 2.3   | 1.51  | 1.41    |
| 229007 | 'Zgpat'         | 38.25 | 28.89 | 35.8 | 0.97 | 35.7 | 19.16 | 55.4 | 22.14 | 23.94 | 12.09   |
| 229011 | 'Samd10'        | 10.53 | 19.23 | 23.9 | 2.01 | 34.1 | 8.01  | 22.3 | 12.04 | 32.55 | 12.44   |
| 229055 | 'Zbtb10'        | 0.2   | 0.21  | 0.76 | 2.36 | 0.03 | 0     | 0.01 | 0.01  | 0.02  | 0.01    |
| 229096 | 'Ythdf3'        | 5.61  | 6.08  | 6.94 | 4.47 | 6.09 | 1.13  | 3.14 | 1.84  | 3.77  | 3.24    |
| 229211 | 'Acad9'         | 17.25 | 20.39 | 17.7 | 7.8  | 18.3 | 24.5  | 23.2 | 31.86 | 16.65 | 17.27   |
| 229214 | 'Qrfpr'         | 0     | 0     | 1.13 | 0    | 0    | 5.48  | 1.76 | 0.22  | 2.2   | 0       |
| 229227 | '4932438A13Rik' | 3.46  | 3.3   | 6.19 | 9.38 | 5.69 | 3.04  | 6.98 | 3.4   | 9.86  | 10.95   |
| 229228 | 'Nudt6'         | 4.26  | 3.18  | 0.13 | 32.5 | 2.9  | 4.41  | 6.83 | 0.32  | 7.67  | 2.88    |
| 229279 | 'Hnrnpa3'       | 30.39 | 44.17 | 25.6 | 16.8 | 39   | 25.17 | 45.3 | 32.1  | 45.97 | 41.11   |
| 229285 | 'Spg20'         | 16.53 | 15.33 | 9.71 | 5.98 | 14   | 8.26  | 7.5  | 12.91 | 11.55 | 28.87   |
| 229302 | 'Tm4sf4'        | 2.31  | 0     | 0    | 0    | 0    | 0     | 0    | 0     | 0     | 0       |
| 229317 | 'Eif2a'         | 7.29  | 6.25  | 8.78 | 14.6 | 6.94 | 12.86 | 3.45 | 9.89  | 13.04 | 18.55   |
| 229320 | 'Clm1'          | 0     | 3.48  | 0.07 | 3.23 | 0    | 0     | 0.07 | 2.99  | 0.01  | 0.01    |
| 229323 | 'Gpr171'        | 1.9   | 0     | 0.3  | 10.7 | 1.22 | 1.68  | 0    | 0     | 2.9   | 0       |

|        |                 |       |       |      |      |      |       |      |       |       |        |
|--------|-----------------|-------|-------|------|------|------|-------|------|-------|-------|--------|
| 229357 | 'Gpr149'        | 7.29  | 6.44  | 0.89 | 0    | 4.62 | 2.97  | 4.96 | 4.2   | 0.19  | 1.33   |
| 229363 | 'Gmps'          | 18.95 | 22.3  | 13.5 | 25.8 | 26   | 20.27 | 24.1 | 12.19 | 15.52 | 41.68  |
| 229445 | 'Ctso'          | 7.89  | 5.41  | 13.7 | 17.1 | 3.83 | 14.71 | 7.16 | 8.95  | 6.53  | 19.39  |
| 229473 | 'Tmem131l'      | 3.86  | 6.65  | 0.97 | 1.37 | 14.1 | 5.93  | 4.24 | 5.72  | 7.87  | 10.17  |
| 229474 | 'Fhdc1'         | 0     | 0     | 0.26 | 1.24 | 0    | 0     | 0    | 0     | 0     | 0      |
| 229487 | 'Gatb'          | 18.07 | 6.03  | 22.4 | 0.03 | 21   | 22.98 | 6.21 | 38.86 | 22.13 | 14.13  |
| 229488 | 'Fam160a1'      | 0     | 0.75  | 0    | 0    | 0    | 0     | 0.5  | 0.63  | 0     | 0      |
| 229499 | 'Fcr1l'         | 0     | 0     | 0    | 0    | 0    | 6.99  | 0    | 0     | 0     | 0      |
| 229503 | 'Rrnad1'        | 15.99 | 18.46 | 23.3 | 9.95 | 25.9 | 3.44  | 18.8 | 15.06 | 22.07 | 27.41  |
| 229504 | 'lsg20l2'       | 2.91  | 0.26  | 2.82 | 0    | 0.08 | 0.69  | 0    | 3.38  | 13.13 | 0.83   |
| 229512 | 'Smg5'          | 19.25 | 11.06 | 19.6 | 18.5 | 17.6 | 14.1  | 5.62 | 10.59 | 17.41 | 10.32  |
| 229517 | 'Slc25a44'      | 20.48 | 10.97 | 23.5 | 17.3 | 21.2 | 13.49 | 9.24 | 31.31 | 16.44 | 13.57  |
| 229521 | 'Syt11'         | 313.4 | 279.8 | 294  | 195  | 252  | 359.4 | 298  | 381.5 | 282.4 | 259.93 |
| 229524 | 'Msto1'         | 32.99 | 34.01 | 26.8 | 12.3 | 53.7 | 19.23 | 49.8 | 37.6  | 24.15 | 50.13  |
| 229534 | 'Pbxip1'        | 12.64 | 17.42 | 12.7 | 15.2 | 15.1 | 9.88  | 1.89 | 10.33 | 7.83  | 16.91  |
| 229541 | 'Dennd4b'       | 0.09  | 4.03  | 3.02 | 4.86 | 1.18 | 0     | 2.07 | 1.42  | 3.28  | 1.69   |
| 229542 | 'Gatad2b'       | 3.79  | 5.83  | 2.71 | 4.58 | 3.18 | 2.54  | 1.93 | 1.54  | 1.67  | 3.09   |
| 229543 | 'Ints3'         | 7.98  | 7.86  | 7.39 | 6.11 | 2.56 | 1.03  | 16.4 | 3.09  | 6.44  | 3.41   |
| 229574 | 'Flg2'          | 0.01  | 0     | 0    | 0    | 0    | 0.01  | 0    | 0     | 0     | 0      |
| 229584 | 'Pogz'          | 3.85  | 2.03  | 5.1  | 6.98 | 2.34 | 0     | 3.76 | 5.71  | 4.55  | 8.29   |
| 229588 | 'Gm128'         | 0     | 0.03  | 0    | 0    | 0    | 0     | 6.59 | 0     | 0     | 0      |
| 229589 | 'Prune1'        | 11.44 | 12.13 | 11.7 | 18.8 | 15.9 | 13.7  | 15.5 | 14.07 | 21.52 | 25.13  |
| 229593 | 'Golp3l'        | 9.88  | 7.9   | 8.07 | 0.11 | 10.5 | 1.15  | 4.31 | 7.49  | 10.73 | 11.01  |
| 229595 | 'Adamtsl4'      | 0     | 0     | 0    | 0    | 0.49 | 2.43  | 0.02 | 0.88  | 1.22  | 0.02   |
| 229599 | 'Ciarl'         | 22.09 | 23.45 | 22.6 | 88.8 | 12.5 | 19.99 | 19.7 | 20.03 | 5.75  | 9.8    |
| 229600 | 'BC028528'      | 1.25  | 1.51  | 8.44 | 8.29 | 1.14 | 2.05  | 17.5 | 1.52  | 1.92  | 2.47   |
| 229603 | 'Otud7b'        | 1.26  | 0.91  | 1.86 | 1.16 | 1.47 | 2.04  | 0.66 | 0.11  | 2.93  | 0.81   |
| 229615 | 'Pias3'         | 18.68 | 19.56 | 14.8 | 3.44 | 15.8 | 11.54 | 30.3 | 30.19 | 13.85 | 16.74  |
| 229644 | 'Trim45'        | 9.72  | 7.8   | 2.43 | 17.1 | 15.4 | 5.83  | 15.9 | 6.14  | 5.72  | 8.88   |
| 229658 | 'Vangl1'        | 0.33  | 1.15  | 1.49 | 11.7 | 1.69 | 0     | 0.01 | 0     | 0     | 0.93   |
| 229663 | 'Csde1'         | 54.85 | 64.87 | 63.5 | 53.5 | 36.8 | 23.44 | 48.4 | 42.01 | 54.11 | 72.51  |
| 229665 | 'Ampd1'         | 0.04  | 0     | 0.02 | 0    | 0    | 0     | 0    | 0     | 0     | 0      |
| 229672 | 'Bcl2l15'       | 0     | 0     | 0    | 0    | 0    | 0     | 0    | 0     | 0.06  | 0      |
| 229675 | 'Rsb1l'         | 6.61  | 4.57  | 6.33 | 12.1 | 5.25 | 4.21  | 10.1 | 3.61  | 7.78  | 1.32   |
| 229681 | 'St7l'          | 11.3  | 10.17 | 8.2  | 13.3 | 7.65 | 9.9   | 12.7 | 3.09  | 11.04 | 18.01  |
| 229687 | 'Chil5'         | 0     | 1.57  | 0.54 | 1.44 | 1.02 | 0.75  | 0.89 | 0.21  | 0     | 0.16   |
| 229699 | 'Slc16a4'       | 0.05  | 0     | 0    | 0    | 0    | 0     | 0.11 | 0     | 0     | 0      |
| 229700 | 'Rbm15'         | 2.61  | 0.68  | 1.36 | 1.58 | 0.91 | 0.65  | 1.34 | 0.41  | 0.61  | 0.91   |
| 229706 | 'Slc6a17'       | 8.85  | 4.19  | 9.83 | 7.69 | 13.3 | 14.57 | 0.87 | 6.14  | 8.61  | 7.69   |
| 229707 | 'Strip1'        | 50.66 | 47.33 | 35.6 | 56.4 | 36.2 | 20.72 | 53.3 | 38.32 | 46.23 | 33.97  |
| 229709 | 'Ahcyl1'        | 24.04 | 16.41 | 21.5 | 8.62 | 19.3 | 10.42 | 26.7 | 12.35 | 19.51 | 9.07   |
| 229714 | 'Gpr61'         | 12.24 | 10.03 | 8.01 | 0    | 9.48 | 1.7   | 7.47 | 10.29 | 18    | 4.53   |
| 229715 | 'Amigo1'        | 1.82  | 3.25  | 4.19 | 1.59 | 4.68 | 4.5   | 2.8  | 1.3   | 3.66  | 0.83   |
| 229722 | '5330417C22Rik' | 14.19 | 28.61 | 19.5 | 13.2 | 25.1 | 9.34  | 7.52 | 19.58 | 36.03 | 33.42  |
| 229725 | 'Clcc1'         | 8.39  | 25.86 | 21.2 | 9.81 | 17.9 | 15.54 | 19.2 | 19.32 | 17.94 | 21.51  |
| 229731 | 'Slc25a24'      | 0     | 0     | 0.01 | 0    | 1.76 | 0     | 0    | 1.04  | 0.89  | 1.94   |
| 229759 | 'Olfm3'         | 38.94 | 16.74 | 7.78 | 14   | 3.62 | 1.37  | 15.2 | 10.46 | 12.51 | 5.6    |
| 229776 | 'Cdc14a'        | 0.01  | 0     | 0.01 | 7.6  | 0    | 0     | 1.11 | 0     | 0     | 0      |
| 229780 | 'Trmt13'        | 3.38  | 3.93  | 3.1  | 7.52 | 5.38 | 5.13  | 10.8 | 7.24  | 6.3   | 10.03  |
| 229782 | 'Slc35a3'       | 0.15  | 1.19  | 1.97 | 2.89 | 2.12 | 0.91  | 0.01 | 0.07  | 2.41  | 1.32   |
| 229791 | 'Plppr4'        | 34.91 | 28.58 | 11.1 | 30.1 | 26.9 | 12.75 | 15.7 | 22.85 | 21.5  | 22.65  |
| 229801 | 'Tram1l1'       | 137.7 | 124.7 | 71.8 | 68.1 | 84.2 | 90.48 | 94.8 | 117.4 | 85.85 | 125.73 |
| 229841 | 'Cenpe'         | 0.01  | 0.01  | 0.01 | 0    | 0.43 | 0.13  | 0.01 | 0.89  | 0     | 0      |
| 229877 | 'Rap1gds1'      | 25.43 | 24.38 | 37.1 | 31.6 | 16.5 | 6.22  | 17.7 | 32.61 | 8.28  | 18.45  |
| 229898 | 'Gbp5'          | 0.32  | 0     | 0    | 0    | 0    | 0     | 0    | 0.25  | 0     | 0      |
| 229900 | 'Gbp7'          | 1.18  | 0.42  | 1.63 | 3.09 | 0.41 | 0     | 0    | 0.03  | 1.27  | 2.58   |
| 229905 | 'Kyat3'         | 0.02  | 2.53  | 3.99 | 0    | 1.58 | 0.03  | 0.25 | 0     | 3.06  | 0      |
| 229906 | 'Gtf2b'         | 37.99 | 33.96 | 37.6 | 60.3 | 48   | 82.88 | 41   | 42.85 | 58.11 | 44.58  |

|        |                 |       |       |      |      |      |       |      |       |       |        |
|--------|-----------------|-------|-------|------|------|------|-------|------|-------|-------|--------|
| 229927 | 'Clca3b'        | 0     | 0     | 0    | 0    | 0    | 0     | 0    | 0.01  | 0     | 0      |
| 229937 | 'Znhit6'        | 18.55 | 27.51 | 18.2 | 5.04 | 33.5 | 39.89 | 26.5 | 10.52 | 19.67 | 10.35  |
| 229949 | 'Ak5'           | 5.27  | 6.73  | 16.7 | 18   | 3.44 | 0     | 10.3 | 9.7   | 34.51 | 7.49   |
| 230025 | 'Prdm13'        | 0     | 0.45  | 0    | 0    | 0    | 0     | 0    | 0     | 0     | 0      |
| 230027 | 'Coq3'          | 25    | 9.68  | 17   | 8.44 | 15   | 15.33 | 10.3 | 13    | 12.57 | 18.96  |
| 230073 | 'Ddx58'         | 0.02  | 0.62  | 0.46 | 7.35 | 0.76 | 1.01  | 0    | 0.47  | 0.93  | 2.47   |
| 230075 | 'Ndufb6'        | 424.7 | 356.3 | 484  | 384  | 362  | 449.3 | 482  | 410.7 | 429.9 | 385.08 |
| 230082 | 'Nol6'          | 14.79 | 25.17 | 40.6 | 6.25 | 16   | 6.98  | 40.5 | 17.35 | 20.53 | 16.17  |
| 230085 | 'Phf24'         | 10.96 | 5.99  | 17   | 4.85 | 8.65 | 5.22  | 7.11 | 8.1   | 3.19  | 7.4    |
| 230088 | 'Fam214b'       | 10.53 | 18.76 | 11   | 15.7 | 16.1 | 21.11 | 31.4 | 3.59  | 21.93 | 14.1   |
| 230098 | 'Arhgef39'      | 0     | 0.93  | 0    | 0    | 0    | 1.85  | 0    | 0.25  | 0     | 0      |
| 230099 | 'Car9'          | 0     | 0     | 0    | 2.11 | 0    | 0     | 0    | 0     | 0.02  | 0      |
| 230101 | 'Gba2'          | 5.15  | 8.32  | 11.9 | 16.1 | 16.8 | 10.15 | 18.6 | 13.93 | 20.9  | 11.06  |
| 230103 | 'Npr2'          | 8.13  | 11.94 | 5.46 | 19.4 | 1.58 | 7.25  | 13.4 | 3.36  | 5.88  | 6.69   |
| 230119 | 'Zbtb5'         | 5.96  | 1.19  | 3.73 | 2.22 | 3.91 | 1.01  | 0    | 0.01  | 2.28  | 1.28   |
| 230125 | 'Slc25a51'      | 34.97 | 17.35 | 27.6 | 20.1 | 18.8 | 18.63 | 25.8 | 21.21 | 30.12 | 34.47  |
| 230126 | 'Shb'           | 0.14  | 0     | 0.02 | 0    | 9.51 | 0     | 0.78 | 1.58  | 2.91  | 5.33   |
| 230145 | 'Galnt12'       | 0.97  | 0     | 0    | 0    | 0    | 4.23  | 0    | 0.03  | 6.64  | 2.42   |
| 230157 | 'Tmeff1'        | 4.95  | 4.54  | 10.8 | 20.6 | 11.6 | 12.27 | 10.8 | 4.68  | 10.87 | 3.33   |
| 230161 | 'Acnat1'        | 0.03  | 0.08  | 0.08 | 0.17 | 0.04 | 0.09  | 0.1  | 0.02  | 0.09  | 0.04   |
| 230162 | 'Zfp189'        | 4.64  | 3.89  | 5.14 | 4.1  | 1.5  | 0     | 0.02 | 2.97  | 4.78  | 4.65   |
| 230163 | 'Aldob'         | 0.04  | 0.86  | 0    | 3.22 | 5.89 | 0     | 0    | 3.8   | 0.89  | 1.04   |
| 230233 | 'Elp1'          | 7.64  | 13.59 | 26.9 | 2.6  | 19.2 | 6.69  | 9.15 | 7.52  | 11.44 | 7.96   |
| 230234 | 'Fam206a'       | 2.67  | 6.39  | 5.51 | 7.22 | 3.39 | 1.11  | 1.55 | 2.42  | 6.84  | 0.52   |
| 230235 | 'Frrs1l'        | 8.84  | 10.59 | 7.56 | 5.11 | 18.1 | 12.4  | 4.42 | 10.83 | 5.69  | 5.27   |
| 230249 | 'Ecpas'         | 5.9   | 4.22  | 8.88 | 10   | 3.88 | 3     | 3.7  | 3.13  | 7.16  | 11.62  |
| 230257 | 'Ptbp3'         | 1.12  | 1.63  | 0.25 | 0.06 | 0.96 | 0.59  | 0    | 0     | 1.39  | 0.08   |
| 230259 | 'E130308A19Rik' | 4     | 0     | 1.32 | 0    | 6.85 | 3.88  | 0.24 | 1.01  | 0     | 1.98   |
| 230279 | 'Tmem268'       | 2.91  | 0.91  | 6.53 | 0    | 10.7 | 9.4   | 8.1  | 12.13 | 4.58  | 5.67   |
| 230316 | 'Megf9'         | 6.72  | 0.03  | 10.3 | 13.2 | 2.45 | 0     | 4.23 | 0.04  | 4.93  | 1.13   |
| 230376 | 'Haus6'         | 0.66  | 0     | 2.16 | 1.03 | 3.83 | 1.26  | 0    | 1.04  | 4.38  | 1.28   |
| 230379 | 'Acer2'         | 7.5   | 6.8   | 4.49 | 5.53 | 4.86 | 18.72 | 4.71 | 4.74  | 2.56  | 11.2   |
| 230393 | 'Focad'         | 2.93  | 4.66  | 9.19 | 21.4 | 3.69 | 5.34  | 6.66 | 0.83  | 7.58  | 5.76   |
| 230459 | 'Cyp2j13'       | 0.01  | 0.01  | 0    | 0    | 0.04 | 0.02  | 0.01 | 0     | 0.08  | 0      |
| 230484 | 'Usp1'          | 0     | 1     | 2.81 | 12   | 3.31 | 0.01  | 0.03 | 1.52  | 1.99  | 0.08   |
| 230500 | 'Efcab7'        | 0.94  | 4.05  | 0    | 0    | 0.03 | 4.08  | 0    | 0.07  | 1.52  | 0.05   |
| 230514 | 'Leprot'        | 28.74 | 6.21  | 12.3 | 27.8 | 21.5 | 41.29 | 5.75 | 18.41 | 15.76 | 18.99  |
| 230576 | 'Ttc22'         | 5.27  | 3.71  | 0    | 0    | 0    | 13.22 | 6.04 | 3.08  | 15.37 | 8.8    |
| 230577 | 'Pars2'         | 3.41  | 6.8   | 0.04 | 0.03 | 2.3  | 0.37  | 11.7 | 3.67  | 10.22 | 2.25   |
| 230579 | 'Fam151a'       | 0     | 3.58  | 0    | 0    | 0    | 0     | 0    | 0     | 0     | 0      |
| 230582 | 'Cyb5rl'        | 9.81  | 0     | 2.98 | 11   | 11.5 | 12.05 | 0.2  | 0.67  | 3.23  | 14.73  |
| 230584 | 'Yipf1'         | 58.14 | 43.44 | 31.6 | 68   | 51.2 | 31.04 | 53.3 | 61.63 | 73.88 | 63.19  |
| 230587 | 'Glis1'         | 0     | 1.29  | 0    | 0.24 | 0.17 | 0     | 0    | 0     | 0     | 0      |
| 230594 | 'Tut4'          | 2.38  | 3.76  | 1.31 | 5.07 | 3.91 | 4.3   | 3.54 | 1.82  | 4.26  | 2.93   |
| 230596 | 'Prpf38a'       | 11.02 | 10.21 | 3.91 | 25.8 | 16.4 | 9.05  | 8.04 | 24.56 | 18.4  | 26.35  |
| 230597 | 'Zfyve9'        | 0.39  | 5.16  | 0.78 | 2.36 | 5.31 | 0.71  | 4.43 | 2.3   | 7.55  | 0.71   |
| 230598 | 'Nrd1'          | 21.3  | 24.28 | 22.4 | 9.04 | 19.7 | 20.44 | 25.3 | 17.95 | 30.27 | 17.04  |
| 230603 | 'Ttc39a'        | 8.18  | 4.59  | 9.36 | 4.1  | 8.3  | 4.77  | 1.95 | 0     | 0.82  | 4.75   |
| 230648 | 'Efcab14'       | 9.53  | 11.23 | 4.22 | 4.38 | 16.1 | 7.05  | 9.76 | 6.22  | 2.98  | 8.42   |
| 230649 | 'Atpaf1'        | 9.98  | 16.53 | 9.94 | 19.1 | 9.27 | 22.19 | 6.66 | 13.8  | 16.12 | 7.02   |
| 230654 | 'Lrrc41'        | 30.75 | 37.45 | 52.8 | 21.8 | 29.3 | 37.39 | 17   | 29.02 | 35.26 | 37.31  |
| 230657 | 'Tmem69'        | 2.03  | 1.22  | 7.37 | 11.5 | 16.9 | 2.97  | 6.73 | 2.03  | 5.34  | 6.01   |
| 230661 | 'Tesk2'         | 0     | 6.49  | 2.73 | 6.23 | 0.06 | 0     | 0.02 | 1.45  | 0     | 2.48   |
| 230673 | 'Ipo13'         | 13.93 | 15.05 | 13.3 | 24.1 | 18.6 | 12.75 | 23.9 | 6.94  | 16.56 | 8.21   |
| 230674 | 'Kdm4a'         | 9.38  | 4.03  | 3.56 | 3.24 | 4.43 | 5.44  | 4.94 | 9.84  | 1.38  | 4.15   |
| 230676 | 'Szt2'          | 2.2   | 0.95  | 2.82 | 0.19 | 0.89 | 1.08  | 2.08 | 1.28  | 0.07  | 0.91   |
| 230678 | 'Tmem125'       | 5.46  | 3.23  | 0    | 0    | 3.51 | 1.57  | 0    | 0     | 0     | 0      |
| 230696 | 'AU022252'      | 10.29 | 6.35  | 12.9 | 5.98 | 6.89 | 14.63 | 3.86 | 15.01 | 5.12  | 3.84   |

|        |                 |       |       |      |      |      |       |      |       |       |        |
|--------|-----------------|-------|-------|------|------|------|-------|------|-------|-------|--------|
| 230700 | 'Foxj3'         | 10.63 | 14.81 | 15.8 | 26.7 | 11.2 | 12.89 | 10.5 | 4.34  | 18.81 | 11.81  |
| 230709 | 'Zmpste24'      | 5.75  | 19.01 | 6.8  | 5.28 | 5.16 | 1.12  | 10.5 | 10.02 | 9.78  | 7.92   |
| 230718 | 'Nt5c1a'        | 1.26  | 0.96  | 3.32 | 0    | 1.26 | 0.14  | 5.16 | 2.55  | 1.67  | 0.56   |
| 230721 | 'Pabpc4'        | 3.72  | 2.65  | 2.35 | 2.66 | 0.49 | 2.8   | 3.29 | 3.81  | 4.09  | 7.72   |
| 230726 | 'Rhbdl2'        | 0.07  | 0.12  | 0.09 | 0.16 | 0.33 | 0     | 0.11 | 0.1   | 0.18  | 0.07   |
| 230734 | 'Yrdc'          | 6.03  | 7.1   | 8.14 | 19.2 | 5.64 | 2.44  | 0.29 | 3.37  | 1.73  | 2.55   |
| 230735 | 'Epha10'        | 5.51  | 0.09  | 6.37 | 1    | 12.1 | 8.9   | 1.26 | 5.45  | 1.11  | 0      |
| 230737 | 'Gnl2'          | 48.28 | 40.78 | 47.5 | 66.3 | 32   | 48.99 | 40.7 | 57.73 | 45.6  | 50.76  |
| 230738 | 'Zc3h12a'       | 0     | 0.02  | 0.01 | 0    | 0.03 | 0.16  | 0    | 0     | 0     | 0.02   |
| 230751 | 'Oscp1'         | 28.82 | 25.91 | 32.3 | 18.3 | 40.6 | 43.38 | 56.2 | 34.82 | 20.51 | 37.04  |
| 230752 | 'Eva1b'         | 0     | 0.89  | 0.47 | 0    | 0    | 0     | 0    | 0.6   | 0     | 0      |
| 230753 | 'Thrap3'        | 24.24 | 26.64 | 20   | 34.4 | 27.3 | 24.46 | 22   | 22.31 | 38.27 | 30.78  |
| 230757 | '5730409E04Rik' | 24.29 | 22.84 | 13.8 | 9.37 | 12.9 | 7.81  | 20.1 | 22.55 | 6.04  | 14.7   |
| 230761 | 'Zfp362'        | 2.29  | 5.41  | 5.24 | 7.85 | 4.69 | 3.67  | 8.8  | 3.72  | 6.67  | 3.69   |
| 230767 | 'Iqcc'          | 15.81 | 11.14 | 0.48 | 9.2  | 9.74 | 11.16 | 11.3 | 11.73 | 1.74  | 5.57   |
| 230770 | 'Tmem39b'       | 10.64 | 12.7  | 15.7 | 1.49 | 0.95 | 7     | 23.6 | 13.52 | 29.24 | 22.81  |
| 230775 | 'Adgrb2'        | 4.12  | 2.39  | 1.08 | 1.34 | 5.1  | 0.03  | 4.17 | 0.01  | 1.6   | 0      |
| 230777 | 'Hcrtr1'        | 9     | 27.15 | 4.91 | 0    | 1.39 | 11.72 | 11.5 | 22.58 | 20.18 | 0      |
| 230779 | 'Serinc2'       | 2.79  | 0.32  | 0.11 | 0.2  | 0.13 | 0.14  | 0.06 | 0.12  | 2.42  | 0.08   |
| 230784 | 'Sesn2'         | 20.32 | 14.89 | 14.8 | 1.72 | 8.32 | 3.71  | 8.68 | 19.81 | 7.84  | 1.91   |
| 230789 | 'Fam76a'        | 36.93 | 29.08 | 47.3 | 31.3 | 26.8 | 24.33 | 28.7 | 21.07 | 31.96 | 21.36  |
| 230793 | 'Ahdc1'         | 0.17  | 2.97  | 1.31 | 3.38 | 1.7  | 1.11  | 1    | 1.03  | 0.75  | 0.95   |
| 230796 | 'Wdtdc1'        | 1.4   | 1.37  | 0.76 | 2.82 | 4.06 | 1.78  | 8.1  | 4.16  | 6.56  | 0.98   |
| 230801 | 'Pigv'          | 6.53  | 7.53  | 3.46 | 10.4 | 21.1 | 3.97  | 4.67 | 5.01  | 1.23  | 19.92  |
| 230806 | 'Crybg2'        | 0.51  | 0     | 0    | 0    | 0.24 | 0.01  | 0    | 0     | 1.81  | 0      |
| 230809 | 'Pdik11'        | 2.77  | 6.76  | 5.12 | 0.06 | 8.94 | 3.23  | 3.46 | 0.89  | 9.95  | 8.2    |
| 230815 | 'Man1c1'        | 0     | 1.27  | 2.43 | 0    | 2.65 | 1.23  | 0.05 | 0.18  | 4.13  | 0.15   |
| 230822 | 'Ncmap'         | 0     | 4.9   | 5.46 | 0.76 | 7.79 | 0     | 8.28 | 1.94  | 16.14 | 3.86   |
| 230824 | 'Grhl3'         | 2.73  | 0     | 0    | 4.35 | 0    | 0     | 0    | 0     | 0     | 0      |
| 230837 | 'Asap3'         | 0     | 2.11  | 1.5  | 2.13 | 0.21 | 1.91  | 2.39 | 1.42  | 0     | 0.04   |
| 230848 | 'Zbtb40'        | 1.36  | 0     | 0.7  | 0    | 0.09 | 0.85  | 0    | 0.13  | 0.03  | 0.09   |
| 230857 | 'Ece1'          | 18.22 | 28.54 | 19.2 | 47.9 | 14.6 | 20.58 | 18.8 | 21.95 | 25.71 | 30.94  |
| 230861 | 'Eif4g3'        | 12.11 | 8.77  | 12.3 | 9.5  | 8.62 | 6.79  | 4.2  | 7.64  | 3.18  | 1.6    |
| 230863 | 'Sh2d5'         | 13.13 | 16.64 | 13.7 | 11   | 23.5 | 15.85 | 18.3 | 9.95  | 25.38 | 20.99  |
| 230866 | 'Emc1'          | 33.55 | 38.75 | 45.3 | 32.9 | 23.7 | 10.76 | 35.9 | 27.92 | 36.48 | 25.4   |
| 230868 | 'Igsf21'        | 14.89 | 12.88 | 26.6 | 26.8 | 41.7 | 2.43  | 21.6 | 35.56 | 0     | 2.56   |
| 230872 | 'Crocc'         | 2.29  | 3.84  | 3.02 | 5.55 | 3.93 | 5.74  | 2.53 | 2.6   | 6.32  | 2.24   |
| 230895 | 'Vps13d'        | 1.68  | 0.63  | 1.19 | 1.45 | 1.45 | 0.77  | 2.59 | 0.95  | 2.03  | 0.45   |
| 230899 | 'Nppa'          | 0.11  | 1.87  | 8.26 | 19.3 | 1.08 | 0.22  | 0    | 0     | 0     | 0.99   |
| 230903 | 'Fbxo44'        | 117.1 | 114.5 | 152  | 137  | 169  | 180.1 | 86   | 174.8 | 140.2 | 116.51 |
| 230904 | 'Fbxo2'         | 21.82 | 11.67 | 21.3 | 65.7 | 44.8 | 10.68 | 28.8 | 41.55 | 11.66 | 7.79   |
| 230908 | 'Tardbp'        | 21.93 | 18.66 | 16.4 | 27.5 | 24   | 12.2  | 24.6 | 18.15 | 22.03 | 14.82  |
| 230917 | 'Tmem201'       | 27.17 | 33.58 | 30.3 | 0.91 | 31.3 | 25.67 | 23.7 | 25.21 | 25.77 | 11.28  |
| 230935 | 'Dnajc11'       | 40.59 | 38.8  | 21.8 | 36.9 | 56.9 | 37.4  | 32.5 | 39.66 | 39.81 | 26.29  |
| 230936 | 'Phf13'         | 5.61  | 6.67  | 1.6  | 16.9 | 5    | 0     | 0.03 | 2.86  | 3.58  | 1.97   |
| 230959 | 'Ajap1'         | 0.01  | 0.28  | 0.64 | 0.99 | 0.3  | 4.46  | 1.57 | 0.62  | 2.61  | 1.1    |
| 230967 | 'Cep104'        | 6.27  | 9.24  | 5.94 | 8.56 | 4.14 | 2.13  | 8.47 | 5     | 5.38  | 7.84   |
| 230971 | 'Megf6'         | 0.48  | 4.08  | 3.37 | 9.5  | 3.1  | 0.2   | 0.2  | 1.85  | 0     | 2.77   |
| 230972 | 'Arhgef16'      | 0     | 0     | 3.08 | 0    | 0    | 5.33  | 0    | 0     | 0.19  | 0.07   |
| 230979 | 'Tnfrsf14'      | 0.15  | 0     | 0.11 | 0.12 | 0.22 | 0.13  | 0.03 | 0.02  | 0.07  | 0.1    |
| 230991 | 'Fndc10'        | 13.49 | 3.83  | 25.7 | 0.48 | 20.3 | 18.7  | 39.4 | 15.77 | 12.09 | 7.61   |
| 230996 | '9430015G10Rik' | 18.84 | 2.12  | 7.99 | 17.7 | 6.74 | 7.68  | 10.2 | 5.88  | 4.33  | 8.48   |
| 231002 | 'Plekhn1'       | 2.69  | 0     | 3.63 | 0    | 3.98 | 0     | 2.71 | 0     | 5.25  | 0.85   |
| 231003 | 'Klhl17'        | 2.23  | 4.14  | 2.13 | 5.99 | 7.53 | 6.98  | 3.11 | 3.66  | 3.49  | 6.49   |
| 231004 | 'Samd11'        | 3.14  | 7.4   | 8.01 | 4.68 | 4.12 | 20.15 | 15.7 | 7.42  | 8.93  | 17.28  |
| 231014 | '9330182L06Rik' | 5.22  | 4.6   | 14.8 | 11.4 | 3.29 | 1.11  | 4.85 | 9.78  | 10.15 | 12.25  |
| 231042 | 'Nupl2'         | 2.3   | 5.29  | 1.73 | 3.12 | 5.49 | 7.61  | 7.08 | 6.84  | 1.02  | 4.6    |
| 231050 | 'Galnt11'       | 19.42 | 28.43 | 35   | 31.2 | 28   | 13.29 | 36   | 31.53 | 30.77 | 21.57  |

|        |                 |       |       |      |      |      |       |      |       |       |       |
|--------|-----------------|-------|-------|------|------|------|-------|------|-------|-------|-------|
| 231051 | 'Kmt2c'         | 1.6   | 3.35  | 2.15 | 4.82 | 2.84 | 1.41  | 2.81 | 1.4   | 2.82  | 2.89  |
| 231070 | 'Insig1'        | 39.96 | 38.74 | 55.2 | 47.1 | 42.6 | 14.4  | 36.7 | 33.68 | 78.22 | 24.63 |
| 231086 | 'Hadhb'         | 116.8 | 69.23 | 63.9 | 52.6 | 87.4 | 122.7 | 73.8 | 32.26 | 80.16 | 71.05 |
| 231093 | 'Agbl5'         | 6.33  | 3.83  | 4.33 | 0    | 3.01 | 2.71  | 9.98 | 2.12  | 6.51  | 1.11  |
| 231103 | 'Gckr'          | 2.17  | 0     | 0    | 0    | 0.15 | 0     | 0    | 0     | 0     | 0     |
| 231123 | 'Haus3'         | 0.99  | 3.3   | 1.95 | 0.12 | 12.1 | 8.06  | 13.5 | 1.46  | 7     | 7.87  |
| 231125 | 'Zfyve28'       | 2.76  | 2.17  | 2    | 10.1 | 3.93 | 7.25  | 3.12 | 2.64  | 3.9   | 6.84  |
| 231128 | 'Fam193a'       | 4.77  | 4.99  | 3.38 | 11.9 | 1.74 | 6.23  | 3.77 | 4.33  | 2.15  | 1.89  |
| 231130 | 'Tnip2'         | 5.43  | 10.8  | 27   | 0    | 5.35 | 12.52 | 4.87 | 30.57 | 37.65 | 17.1  |
| 231134 | 'Dok7'          | 4.23  | 6.45  | 8.22 | 1.42 | 10.6 | 0.19  | 2.7  | 4.3   | 11.33 | 0.99  |
| 231148 | 'Ablim2'        | 23.7  | 35.15 | 31.7 | 8.14 | 29.3 | 24.52 | 38.1 | 22.33 | 18.91 | 31.93 |
| 231151 | 'Tada2b'        | 0.72  | 0     | 0    | 4.51 | 0.51 | 0.72  | 0    | 0.18  | 0     | 0     |
| 231201 | 'AF366264'      | 0     | 0     | 0.02 | 0    | 0    | 0     | 0    | 0     | 0     | 0.01  |
| 231207 | 'Cpeb2'         | 0.53  | 0.95  | 1.56 | 2.68 | 0.97 | 0.82  | 4.19 | 1.74  | 0.46  | 1.43  |
| 231214 | 'Cc2d2a'        | 1.63  | 2.25  | 0.83 | 7.18 | 0.23 | 1.14  | 2.87 | 1.68  | 1.66  | 8.18  |
| 231225 | 'Tapt1'         | 6.86  | 0.01  | 1.38 | 4.23 | 1.98 | 2.07  | 7.38 | 4.57  | 1.28  | 0.88  |
| 231238 | 'Sel1l3'        | 1.17  | 0     | 1.17 | 4.12 | 2.27 | 0.47  | 0    | 0.29  | 2.47  | 0     |
| 231252 | 'Chrna9'        | 0     | 0.38  | 0    | 0    | 0    | 0.16  | 0    | 0     | 0     | 0     |
| 231279 | 'Guf1'          | 1.92  | 1.66  | 1.68 | 0.89 | 4.82 | 5.89  | 3.89 | 2.94  | 4.02  | 2.1   |
| 231290 | 'Slc10a4'       | 0     | 0     | 0    | 0    | 4.3  | 0     | 0    | 2.85  | 0     | 1.33  |
| 231293 | 'Cwh43'         | 0     | 0     | 0    | 0    | 0.02 | 0     | 0    | 0.52  | 0.08  | 0     |
| 231296 | 'Lrrc66'        | 0     | 0     | 0.79 | 0    | 0    | 0     | 0    | 0     | 0     | 0     |
| 231326 | 'Aasdh'         | 5.28  | 4.01  | 1.77 | 3.04 | 6.03 | 2.82  | 12.9 | 3.46  | 2.34  | 4.5   |
| 231327 | 'Ppat'          | 1.68  | 6.15  | 3.93 | 6.37 | 4.67 | 4.09  | 5.16 | 1.86  | 2.15  | 0.01  |
| 231329 | 'Polr2b'        | 38.99 | 19.41 | 22.7 | 43.4 | 20.6 | 8.33  | 39.4 | 29.16 | 41.06 | 49.3  |
| 231380 | 'Uba6'          | 7.33  | 2.24  | 5.1  | 0.37 | 0.49 | 1.29  | 0.14 | 1.13  | 4.63  | 6.41  |
| 231386 | 'Ythdc1'        | 6.72  | 4.66  | 5.83 | 23.3 | 6.04 | 5.71  | 6.26 | 4.53  | 5.83  | 3.71  |
| 231413 | 'Grsf1'         | 34.73 | 17.87 | 48.8 | 64.8 | 22.6 | 11.84 | 49.6 | 27.49 | 28.41 | 34.16 |
| 231430 | 'Cox18'         | 24.29 | 14.67 | 17.6 | 31.1 | 15.6 | 44.47 | 18.2 | 16.98 | 10.12 | 25.67 |
| 231440 | 'Parm1'         | 61.83 | 30.4  | 13.2 | 34.7 | 95.3 | 30.43 | 32   | 25.95 | 7.62  | 26.96 |
| 231452 | 'Sdad1'         | 1.28  | 4.6   | 10.2 | 7.48 | 2.11 | 8.6   | 9.93 | 5.15  | 7.95  | 8.62  |
| 231464 | 'Cnot6l'        | 1.78  | 2.86  | 1.83 | 1.85 | 1.1  | 0.86  | 1.43 | 0.48  | 1.51  | 0.82  |
| 231470 | 'Fras1'         | 0     | 0     | 0    | 0.01 | 0.53 | 0     | 0    | 0.05  | 0     | 0.25  |
| 231474 | 'Paqr3'         | 13.54 | 20.23 | 10.8 | 18.7 | 14.8 | 9.36  | 8.16 | 9.45  | 19.06 | 8.79  |
| 231503 | 'Tmem150c'      | 9.4   | 10.13 | 9.93 | 8.16 | 10.9 | 16.82 | 12.4 | 7.54  | 19.61 | 15.52 |
| 231506 | 'Lin54'         | 1.03  | 0     | 3.19 | 0    | 0.03 | 0     | 1.3  | 0.7   | 0     | 1.36  |
| 231507 | 'Plac8'         | 0     | 0     | 0    | 0    | 1.64 | 0     | 0    | 0     | 0     | 0     |
| 231510 | 'Gpat3'         | 1.87  | 0     | 3.5  | 2.29 | 3.89 | 1.41  | 0    | 3.58  | 8.61  | 2.35  |
| 231532 | 'Arhgap24'      | 24.57 | 12.92 | 16.1 | 4.65 | 20.4 | 59.84 | 15.5 | 20.48 | 13.03 | 47.29 |
| 231549 | 'Lrrc8d'        | 4.24  | 11.28 | 5.23 | 5.38 | 7.76 | 0.01  | 0.11 | 2.95  | 10.35 | 7.56  |
| 231570 | 'A830010M20Rik' | 9.75  | 8.48  | 10.2 | 15.5 | 8.53 | 4.38  | 5.82 | 9.41  | 10.07 | 11.94 |
| 231571 | 'Rpap2'         | 5.03  | 16.84 | 3.18 | 16.9 | 16.6 | 10.48 | 6.74 | 21.42 | 8.72  | 11.7  |
| 231580 | 'Gak'           | 16.98 | 13.42 | 24.6 | 17   | 22.9 | 10.56 | 28.4 | 27.13 | 29.21 | 14.66 |
| 231583 | 'Slc26a1'       | 1.29  | 0.44  | 0    | 0    | 0    | 0     | 0    | 2.28  | 0.77  | 1.97  |
| 231600 | 'Chfr'          | 12.31 | 10.71 | 10.7 | 13.8 | 6.29 | 3.63  | 9.57 | 10.09 | 9.73  | 12.84 |
| 231602 | 'P2rx2'         | 1.98  | 4.57  | 0.03 | 0    | 0.03 | 0     | 0    | 2.82  | 0     | 10.14 |
| 231605 | 'Galnt9'        | 3.05  | 2.93  | 3.3  | 1.93 | 6.31 | 10.24 | 0    | 12.16 | 7.82  | 0     |
| 231630 | 'Ficd'          | 12.7  | 11.05 | 12.3 | 2.75 | 8.86 | 23.01 | 8.22 | 13.8  | 14.56 | 26.08 |
| 231633 | 'Tmem119'       | 0     | 1.91  | 0    | 0.03 | 1.06 | 75.29 | 0    | 1.79  | 0     | 0     |
| 231637 | 'Ssh1'          | 2.39  | 1.26  | 3.08 | 1.86 | 0.61 | 1     | 4.94 | 1.16  | 0     | 0.15  |
| 231642 | 'Alkbh2'        | 9.3   | 15.63 | 21.7 | 6.06 | 16.6 | 16.14 | 2.43 | 8.33  | 10.92 | 22.93 |
| 231646 | 'Myo1h'         | 2.98  | 3.78  | 0.39 | 0.1  | 0.12 | 5.88  | 4.7  | 1.73  | 1.43  | 4.84  |
| 231659 | 'Gcn1l1'        | 7.36  | 5.23  | 10.3 | 1.15 | 11.4 | 4.52  | 10.6 | 4.42  | 1.14  | 3.64  |
| 231668 | 'Vsig10'        | 0     | 1.45  | 0.28 | 0    | 0    | 0     | 0    | 0     | 0     | 3.7   |
| 231670 | 'Fbxo21'        | 25.89 | 36.56 | 81.4 | 39.2 | 38.2 | 18.71 | 79.7 | 40.6  | 35.55 | 25.1  |
| 231672 | 'Fbxw8'         | 2.93  | 3.41  | 0.42 | 1.07 | 0.91 | 0.15  | 0.32 | 1.2   | 0     | 0.43  |
| 231712 | 'Trafd1'        | 22.88 | 27.47 | 36.7 | 32.4 | 27.7 | 30.2  | 33   | 32.05 | 26.43 | 16.14 |
| 231713 | 'Naa25'         | 22.71 | 21.53 | 23.5 | 2.61 | 17.6 | 18.16 | 36.9 | 13.74 | 18.24 | 13.45 |

|        |                 |       |       |      |      |      |       |      |       |       |        |
|--------|-----------------|-------|-------|------|------|------|-------|------|-------|-------|--------|
| 231717 | 'Pheta1'        | 0.02  | 5.39  | 8    | 0    | 4.67 | 3.18  | 4.99 | 0     | 5.5   | 2.28   |
| 231724 | 'Rad9b'         | 1.98  | 7.1   | 14.7 | 12.5 | 3.45 | 0.03  | 8.46 | 17.06 | 0.11  | 7.43   |
| 231727 | 'B3gnt4'        | 6.75  | 1.67  | 0    | 5.54 | 0    | 0.1   | 0    | 2.64  | 0.02  | 1.18   |
| 231760 | 'Rimbp2'        | 1.1   | 0.65  | 1.24 | 2.15 | 3.22 | 3.25  | 0.55 | 0.78  | 0.14  | 0.57   |
| 231769 | 'Sfswap'        | 5.3   | 6.27  | 10.7 | 5.26 | 12.3 | 10.59 | 7.44 | 6.55  | 6.48  | 3.12   |
| 231798 | 'Lrch4'         | 5.47  | 12.2  | 13.6 | 0    | 23.3 | 13.52 | 2.06 | 17.82 | 20.58 | 10.54  |
| 231801 | 'Agfg2'         | 12.69 | 4.72  | 4.02 | 3.3  | 2.53 | 3.31  | 2.64 | 7.66  | 9.82  | 1.81   |
| 231803 | 'Mepce'         | 3.82  | 0.18  | 5    | 7.35 | 3.71 | 5.07  | 1.61 | 5.46  | 6.02  | 2.17   |
| 231805 | 'Pilra'         | 0     | 0.53  | 0.02 | 0.04 | 0.09 | 3.08  | 0    | 0.46  | 0     | 0.02   |
| 231807 | 'BC037034'      | 0.1   | 0     | 0    | 1.35 | 0.83 | 0     | 1.64 | 1.16  | 2.01  | 0      |
| 231821 | 'Adap1'         | 15.56 | 16.48 | 24.2 | 17.1 | 29   | 12.29 | 10.5 | 14.34 | 8.76  | 10.65  |
| 231830 | 'Micall2'       | 0.94  | 3     | 0.95 | 0    | 0.44 | 0.38  | 1.49 | 0.33  | 3.38  | 0.96   |
| 231832 | 'Tmem184a'      | 0     | 5.71  | 0    | 0    | 7.64 | 0     | 0.05 | 0     | 0     | 0      |
| 231834 | 'Snx8'          | 11.82 | 29.79 | 29.1 | 0.58 | 28.9 | 12.06 | 20.9 | 19.9  | 6     | 3.32   |
| 231841 | 'Brat1'         | 16.6  | 7.66  | 11   | 0    | 7.19 | 15.76 | 2.93 | 11.17 | 1.73  | 4.25   |
| 231842 | 'Amz1'          | 15.84 | 17.43 | 11   | 5.71 | 4.61 | 3.2   | 5.02 | 10.83 | 13.8  | 7.34   |
| 231855 | 'Ap5z1'         | 8.47  | 8.27  | 7.38 | 7.72 | 6.89 | 6.94  | 0    | 5.38  | 8.31  | 4.55   |
| 231858 | 'Radil'         | 8.5   | 12.99 | 13   | 0.92 | 13   | 4.79  | 9.8  | 20.08 | 12.28 | 4.42   |
| 231861 | 'Tnrc18'        | 0.25  | 0.9   | 1.64 | 0.2  | 0.41 | 0.06  | 0.48 | 0.08  | 0.2   | 1.06   |
| 231863 | 'Fbxl18'        | 0.03  | 1.65  | 0    | 5.92 | 1.52 | 5.17  | 0.97 | 1.21  | 3.08  | 0      |
| 231866 | 'Zfp12'         | 4.24  | 2.04  | 4.26 | 5.5  | 6.68 | 2.93  | 3.5  | 1.11  | 6.15  | 2.12   |
| 231868 | 'E130309D02Rik' | 12.52 | 6.03  | 7.17 | 10   | 15   | 3.47  | 13.1 | 0.66  | 23.06 | 10.54  |
| 231871 | 'Daglb'         | 19.58 | 11.11 | 18   | 10.3 | 19.8 | 24.07 | 15.5 | 12.29 | 10.51 | 27.58  |
| 231872 | 'Aimp2'         | 41.33 | 52.82 | 78.4 | 76.7 | 79.6 | 49.25 | 46   | 49.21 | 76.5  | 58.62  |
| 231874 | 'Ccz1'          | 3.61  | 0     | 1.61 | 22   | 0.68 | 4.19  | 4.81 | 2.95  | 2.91  | 0      |
| 231876 | 'Lmtk2'         | 0.33  | 0.46  | 1.44 | 0.02 | 0.14 | 1.05  | 3.27 | 2.11  | 1.88  | 0.62   |
| 231887 | 'Pdap1'         | 29.76 | 20.32 | 36.1 | 24.7 | 39.3 | 23.76 | 28.8 | 28.35 | 39.32 | 26.28  |
| 231889 | 'Bud31'         | 37.15 | 63.68 | 61.4 | 79.2 | 41.9 | 52.38 | 53.8 | 59.24 | 21.44 | 42.87  |
| 231912 | 'Katnal1'       | 16.91 | 17.15 | 25.1 | 16.7 | 23.4 | 3     | 7.2  | 15.23 | 17.92 | 13.85  |
| 231915 | 'Usp11'         | 12.22 | 12.3  | 18.6 | 19.8 | 14.2 | 3.88  | 6.7  | 14.31 | 2.78  | 15.32  |
| 231931 | 'Gimap6'        | 0     | 14.95 | 0    | 0    | 0    | 0.34  | 0    | 1.86  | 0     | 0      |
| 231946 | 'Fam221a'       | 3.93  | 3.14  | 2.27 | 0    | 0    | 2.06  | 0    | 1.98  | 0     | 1.83   |
| 231986 | 'Jazf1'         | 16    | 21.34 | 17.7 | 9.68 | 9.05 | 4.59  | 9.45 | 8.17  | 8.33  | 3.93   |
| 231991 | 'Creb5'         | 0     | 1.75  | 3.48 | 0    | 0.76 | 2.28  | 4.12 | 0.84  | 0     | 0.67   |
| 231997 | 'Fkbp14'        | 3.08  | 18.41 | 6.45 | 7.21 | 10.4 | 7.02  | 20.5 | 11.36 | 17.21 | 24.11  |
| 231999 | 'Plekha8'       | 2.06  | 0.85  | 0.16 | 2.59 | 0    | 2.29  | 0    | 0.98  | 0     | 2.17   |
| 232016 | 'Itprid1'       | 0     | 0     | 0    | 0.01 | 0    | 0     | 0    | 0     | 0     | 0      |
| 232023 | 'Vopp1'         | 37.67 | 34.48 | 29.8 | 9.94 | 17.7 | 5.51  | 27.9 | 20.68 | 19.93 | 40.53  |
| 232035 | 'Ccser1'        | 1.29  | 0.94  | 0.24 | 1.95 | 0.01 | 0     | 1.7  | 0.22  | 0.6   | 2.37   |
| 232078 | 'Thnsl2'        | 2.08  | 0     | 6.56 | 0.03 | 9.16 | 0.02  | 0    | 2.51  | 5.79  | 3.43   |
| 232086 | 'Tmem150a'      | 3.49  | 2.06  | 2.19 | 0    | 3.6  | 3.43  | 0.03 | 0.3   | 0.72  | 0.51   |
| 232087 | 'Mat2a'         | 131.7 | 134.4 | 111  | 105  | 146  | 133   | 95.8 | 135.2 | 113.9 | 95.1   |
| 232089 | 'Elmod3'        | 2.59  | 13.05 | 2.14 | 3.64 | 3.96 | 14.73 | 12.3 | 7.19  | 6.42  | 5.51   |
| 232146 | 'Eva1a'         | 6.57  | 5.3   | 0    | 0    | 2.75 | 0     | 0    | 4.65  | 0     | 1.33   |
| 232156 | 'Slc4a5'        | 0     | 0     | 0    | 0    | 0    | 0     | 0    | 0.01  | 0     | 0      |
| 232157 | 'Mob1a'         | 2.87  | 0.51  | 1.98 | 0    | 0.03 | 0.56  | 0    | 0     | 0     | 0      |
| 232164 | 'Paip2b'        | 23.67 | 8.91  | 13.7 | 9.64 | 7.03 | 20.84 | 6.21 | 13.86 | 28.08 | 19.61  |
| 232174 | 'Cyp26b1'       | 0     | 0     | 0.01 | 0    | 0    | 0     | 0    | 0     | 0     | 0      |
| 232187 | 'Smyd5'         | 30.01 | 30.3  | 59   | 10.3 | 25.2 | 30.85 | 31.9 | 30.49 | 27.19 | 26.26  |
| 232196 | 'C87436'        | 19.15 | 15.88 | 22.1 | 31.2 | 18   | 15.94 | 3.72 | 10    | 16.08 | 26.85  |
| 232201 | 'Arhgap25'      | 0.01  | 0     | 0    | 0.02 | 0    | 2.04  | 0    | 0     | 0     | 0      |
| 232210 | 'Hmces'         | 37.11 | 34.93 | 11.3 | 52.7 | 16.5 | 32.59 | 33.4 | 53.25 | 33.4  | 42.36  |
| 232223 | 'Txnrd3'        | 9.2   | 2.54  | 11.4 | 0.02 | 4.14 | 0     | 12   | 0.97  | 2.61  | 0.05   |
| 232227 | 'Iqsec1'        | 7.1   | 14.25 | 14.3 | 18   | 14.9 | 4.9   | 6.59 | 5.88  | 9.01  | 15.42  |
| 232232 | 'Hdac11'        | 131.3 | 122.1 | 138  | 76.6 | 122  | 122.4 | 111  | 144.2 | 149.6 | 179.43 |
| 232236 | 'Ccfdc174'      | 16.53 | 12.18 | 18.7 | 24.5 | 4    | 37.81 | 11.3 | 13.29 | 31.39 | 27.68  |
| 232237 | 'Fgd5'          | 3.43  | 0.75  | 1.11 | 1.35 | 2.68 | 2.42  | 1.65 | 0     | 1.28  | 0.06   |
| 232286 | 'Tmf1'          | 11.68 | 10.82 | 8.26 | 12.1 | 11.8 | 9.1   | 12.9 | 8.94  | 10.22 | 10.36  |





|        |                 |       |       |      |      |      |       |      |       |       |        |
|--------|-----------------|-------|-------|------|------|------|-------|------|-------|-------|--------|
| 232973 | 'Lypd4'         | 0     | 0     | 0    | 0    | 0    | 0.43  | 0    | 0     | 0     | 0      |
| 232974 | 'Gm4881'        | 0     | 0     | 0    | 0    | 0    | 0     | 19.2 | 0     | 0     | 0      |
| 232975 | 'Atp1a3'        | 572.8 | 460.9 | 911  | 144  | 560  | 281.8 | 726  | 677.8 | 435.5 | 578.99 |
| 232976 | 'Zfp574'        | 4.19  | 6.08  | 8.96 | 13.9 | 7.48 | 3.33  | 6.64 | 4.98  | 2.83  | 4.92   |
| 232983 | 'Cxcl17'        | 0     | 0     | 0.6  | 0    | 0    | 0     | 0    | 0     | 1.08  | 0      |
| 232984 | 'B3gnt8'        | 0     | 0     | 0    | 0.77 | 0.03 | 0     | 0    | 0     | 0     | 0      |
| 232987 | 'B9d2'          | 70.72 | 51.17 | 39.4 | 70.2 | 80   | 110.6 | 11.9 | 57.26 | 44.1  | 59.84  |
| 232989 | 'Hnrnpul1'      | 7.31  | 4.37  | 3.37 | 5.12 | 3.22 | 1.42  | 6.4  | 2.95  | 10.53 | 3.17   |
| 233011 | 'Itpkc'         | 0.01  | 2.35  | 0    | 19.7 | 0    | 2.34  | 3.72 | 0.28  | 0     | 5.38   |
| 233016 | 'Blvrb'         | 8.31  | 2.21  | 9.9  | 0    | 12   | 19.32 | 0    | 5.65  | 14.52 | 15.55  |
| 233020 | 'Hipk4'         | 0.44  | 0.35  | 0.29 | 5.14 | 0.35 | 3.18  | 6.72 | 1.38  | 2.63  | 0      |
| 233033 | 'Samd4b'        | 1.11  | 2.28  | 4.2  | 4.35 | 0.15 | 3.17  | 6.51 | 2.82  | 4.37  | 1.67   |
| 233040 | 'Fbxo27'        | 0     | 8.33  | 3.9  | 5.29 | 4.31 | 1.36  | 10.9 | 10.71 | 5.81  | 11.68  |
| 233046 | 'Rasgrp4'       | 0.08  | 1.13  | 1.01 | 0.02 | 0.27 | 1.02  | 1.06 | 0.64  | 1.3   | 0.37   |
| 233056 | 'Zfp790'        | 6.69  | 5.95  | 5.6  | 5.1  | 4.92 | 1.2   | 7.34 | 1.23  | 3.78  | 12.01  |
| 233057 | 'Zfp940'        | 8.11  | 6.45  | 7.68 | 0    | 5.4  | 0.2   | 7.37 | 7.28  | 4.83  | 6.86   |
| 233058 | 'Zfp420'        | 6.3   | 9.01  | 0.29 | 0    | 4.34 | 2.95  | 4.6  | 8.55  | 4.78  | 1.28   |
| 233060 | 'Zfp382'        | 3.21  | 4.47  | 2.86 | 0.16 | 1.57 | 1.37  | 0.13 | 4.92  | 0.92  | 0.25   |
| 233064 | 'Wdr62'         | 0     | 0.02  | 0.02 | 0    | 0    | 0     | 0.03 | 0     | 0.01  | 0      |
| 233065 | 'Alkbh6'        | 90.48 | 109.7 | 98.4 | 139  | 144  | 123.1 | 81.2 | 145.1 | 144.9 | 132.17 |
| 233066 | 'Syne4'         | 4.17  | 0.63  | 0.47 | 0    | 6.88 | 1.79  | 1.17 | 0.15  | 8.68  | 5.62   |
| 233067 | 'Lrfn3'         | 1.98  | 2.75  | 4.55 | 3.26 | 5.74 | 1.6   | 2.27 | 0.06  | 1.34  | 2.09   |
| 233071 | 'Arhgap33'      | 8.26  | 3.57  | 7.44 | 0.07 | 11.2 | 7.54  | 10.6 | 5.49  | 5.42  | 13.89  |
| 233073 | 'U2af1l4'       | 43.96 | 53.37 | 66.8 | 67.9 | 108  | 58.53 | 36.8 | 58.98 | 77.37 | 84.15  |
| 233079 | 'Ffar2'         | 0     | 0     | 0.02 | 0    | 0    | 0     | 0    | 0     | 0     | 0      |
| 233103 | '4931406P16Rik' | 2.44  | 0.87  | 7.07 | 2.99 | 1.55 | 2.65  | 3.72 | 0.59  | 3.8   | 4.3    |
| 233107 | 'Kctd15'        | 5.65  | 3.31  | 0.07 | 0    | 1.91 | 0     | 6.42 | 0.02  | 2.38  | 2.18   |
| 233115 | 'Dpy19l3'       | 0.8   | 3.59  | 1.69 | 2.77 | 0.04 | 0.65  | 2.42 | 2.34  | 3.5   | 4.74   |
| 233147 | 'Zfp939'        | 1.98  | 0.73  | 1.07 | 0    | 5.96 | 3.04  | 0.03 | 7.68  | 7.03  | 6.52   |
| 233168 | 'Al987944'      | 7.59  | 8.05  | 2.16 | 0    | 8.04 | 5.78  | 2.18 | 4.65  | 9.09  | 6.98   |
| 233189 | 'Ctu1'          | 5.81  | 7.85  | 0    | 3.23 | 7.3  | 0     | 0.83 | 5.63  | 0     | 4.26   |
| 233204 | 'Tbc1d17'       | 41.89 | 39.12 | 57.2 | 29.2 | 39   | 38.73 | 27.1 | 40    | 60.5  | 29.79  |
| 233208 | 'Scaf1'         | 3.34  | 4.06  | 12.4 | 0.84 | 2.94 | 1.3   | 2.85 | 4.43  | 3.68  | 7.05   |
| 233210 | 'Prr12'         | 1.16  | 0.84  | 2.62 | 3.49 | 0.7  | 1.88  | 2.41 | 1.08  | 0.87  | 2.24   |
| 233231 | 'Mrgprb1'       | 0     | 0     | 0    | 0.03 | 0.02 | 0.02  | 0.01 | 0     | 0     | 0      |
| 233246 | 'Ano5'          | 0.23  | 1.85  | 0.73 | 2.67 | 2.59 | 2.18  | 1.01 | 0.21  | 0.43  | 1.44   |
| 233271 | 'Luzp2'         | 12.5  | 5.97  | 14.4 | 3.48 | 28   | 9.23  | 13.4 | 7.59  | 3.07  | 9.83   |
| 233274 | 'Siglech'       | 0     | 1.07  | 0    | 16.7 | 10.7 | 26.69 | 3.78 | 0.45  | 4.32  | 0      |
| 233276 | 'Tubgcp5'       | 21.34 | 9.88  | 16.2 | 4.18 | 17.3 | 3.97  | 13.8 | 12.24 | 18.82 | 7.18   |
| 233280 | 'Nipa1'         | 6.66  | 5.19  | 2.41 | 4.64 | 1.55 | 0.68  | 6.02 | 9.07  | 3.93  | 3.63   |
| 233315 | 'Mtmr10'        | 2.05  | 0.66  | 0.6  | 2.5  | 0.06 | 1.39  | 6.24 | 0     | 4.52  | 1.33   |
| 233332 | 'Adamts17'      | 0.19  | 0.01  | 0.04 | 0    | 1.05 | 0     | 1.71 | 0.16  | 0     | 0.84   |
| 233335 | 'Synm'          | 1.34  | 1.7   | 1.44 | 4.4  | 5.75 | 0.19  | 1.53 | 0.82  | 0     | 0      |
| 233405 | 'Vps33b'        | 12.4  | 18.97 | 11.7 | 12.8 | 6.01 | 12.56 | 23.4 | 16.91 | 11.11 | 13.45  |
| 233406 | 'Prc1'          | 0     | 0.06  | 0.23 | 0    | 0.6  | 0     | 0    | 0.4   | 4.34  | 0      |
| 233410 | 'Zfp592'        | 0.8   | 0.95  | 1.15 | 2    | 0.69 | 0.07  | 5.28 | 0.16  | 3.55  | 0.86   |
| 233424 | 'Tmc3'          | 0.97  | 0     | 0.01 | 0    | 1.8  | 0.03  | 0    | 1.46  | 0     | 0.02   |
| 233489 | 'Picalm'        | 8.87  | 6.29  | 4.87 | 20.4 | 5.64 | 9.41  | 3.77 | 3.23  | 3.38  | 4.84   |
| 233490 | 'Crebzf'        | 3.75  | 3.29  | 1.35 | 0.14 | 3.64 | 4.62  | 2.77 | 1.01  | 2.24  | 1.9    |
| 233529 | 'Kctd14'        | 0.02  | 0.12  | 0    | 0    | 0    | 0.04  | 0    | 0.04  | 0     | 0      |
| 233532 | 'Rsf1'          | 5.24  | 0.81  | 2.63 | 5.49 | 4.51 | 3.05  | 3.93 | 3.89  | 3.58  | 1.42   |
| 233537 | 'Gdprd4'        | 0.01  | 0     | 0    | 0    | 0    | 0     | 0    | 0     | 0     | 0      |
| 233545 | 'Emsy'          | 4.18  | 11.86 | 7.73 | 4.4  | 4.6  | 5.5   | 14.6 | 4.79  | 5.67  | 8.05   |
| 233552 | 'Gdprd5'        | 2.47  | 1.42  | 1.91 | 1.07 | 2.07 | 0     | 2.99 | 0     | 4.67  | 0.01   |
| 233571 | 'P2ry6'         | 0.02  | 0     | 0.03 | 0    | 0    | 13.5  | 0    | 0     | 0     | 0      |
| 233575 | 'Pgap2'         | 6.92  | 4.5   | 5.93 | 2.4  | 14   | 4.58  | 9.13 | 5.83  | 9.7   | 10.57  |
| 233649 | 'Cnga4'         | 0.58  | 0.36  | 0    | 0    | 3.62 | 0.88  | 0    | 0     | 3.84  | 1.12   |
| 233651 | 'Dchs1'         | 0.84  | 1.13  | 0    | 0.74 | 1.06 | 0.67  | 2.17 | 0.92  | 1.21  | 0.95   |

|        |                 |       |       |      |      |      |       |      |       |       |        |
|--------|-----------------|-------|-------|------|------|------|-------|------|-------|-------|--------|
| 233724 | 'Tmem41b'       | 14.84 | 16.65 | 24.7 | 30.9 | 13   | 23.57 | 20.5 | 14.42 | 18.63 | 16.98  |
| 233726 | 'lpo7'          | 8.78  | 2.73  | 14.8 | 10.5 | 7.36 | 5.57  | 13.1 | 6.44  | 10.24 | 11.58  |
| 233733 | 'Galnt18'       | 17.53 | 29.88 | 6.28 | 25.4 | 29.9 | 10.74 | 12.5 | 11.24 | 3.44  | 40.32  |
| 233744 | 'Spon1'         | 58.7  | 9     | 14.4 | 8.52 | 15.3 | 5.46  | 9.94 | 59.53 | 15.72 | 12.33  |
| 233752 | 'Insc'          | 0     | 0     | 0    | 0    | 0.15 | 3.57  | 4.37 | 0     | 0     | 0      |
| 233765 | 'Plekha7'       | 3.97  | 7.97  | 6.05 | 2.02 | 5.35 | 1.49  | 4.89 | 2.48  | 2.26  | 4.04   |
| 233781 | 'Xylt1'         | 0     | 0     | 1.13 | 0    | 0    | 0     | 0    | 0     | 0.01  | 0      |
| 233789 | 'Smg1'          | 1.85  | 1.85  | 2.85 | 3.34 | 3.02 | 2.13  | 3.92 | 0.83  | 1.52  | 1.66   |
| 233799 | 'Acsm2'         | 0     | 0     | 0.01 | 0    | 0    | 0     | 0    | 0     | 0     | 0      |
| 233802 | 'Thumpd1'       | 66.33 | 57.86 | 52.1 | 86.7 | 39.8 | 78.65 | 36.6 | 43.76 | 52.6  | 57.55  |
| 233805 | 'Dcun1d3'       | 3.18  | 1.95  | 1.07 | 4.75 | 0.22 | 0.03  | 2.95 | 1.55  | 5.6   | 3.22   |
| 233806 | 'Tmem159'       | 17.06 | 13.9  | 11.8 | 15.7 | 13   | 22.43 | 6.85 | 19.67 | 42.45 | 33.24  |
| 233812 | 'Mosmo'         | 4.92  | 4.29  | 4.94 | 5.19 | 6.58 | 1.35  | 0.26 | 3.27  | 2.54  | 8.05   |
| 233813 | 'Vwa3a'         | 8.69  | 2.49  | 11   | 1.57 | 4.84 | 0.02  | 0.01 | 2.53  | 0     | 7.54   |
| 233824 | 'Cog7'          | 17.96 | 46.36 | 47.7 | 48.1 | 45.2 | 38.12 | 35.3 | 32.85 | 26.77 | 49.41  |
| 233826 | 'Palb2'         | 0     | 0     | 0.03 | 0    | 0    | 0.32  | 0.35 | 0.13  | 0     | 0      |
| 233833 | 'Tnrc6a'        | 3.02  | 7.38  | 7.34 | 11.3 | 11.9 | 7.42  | 8.23 | 6.96  | 8.72  | 6.16   |
| 233836 | 'Slc5a11'       | 3.07  | 0.5   | 0    | 0    | 0.06 | 0     | 0    | 0     | 0     | 2.8    |
| 233863 | 'Gtf3c1'        | 8.99  | 7.93  | 19.6 | 16   | 7.8  | 8.86  | 8.46 | 6.05  | 11.12 | 7.25   |
| 233865 | 'D430042O09Rik' | 1.9   | 2.33  | 2.04 | 4.43 | 0.14 | 1.61  | 0.34 | 1.26  | 3.95  | 3.01   |
| 233870 | 'Tufm'          | 56.76 | 40.34 | 82.5 | 48.6 | 65.5 | 60.75 | 66.5 | 60.89 | 88.71 | 53.17  |
| 233871 | 'Atxn2l'        | 9.87  | 7.79  | 11.3 | 19.1 | 8.62 | 4.14  | 7.3  | 9.43  | 11.6  | 4.25   |
| 233875 | 'Ino80e'        | 48.33 | 37.35 | 43.9 | 51.3 | 28.6 | 61.57 | 42.8 | 46.24 | 61.52 | 69.49  |
| 233876 | 'Hirip3'        | 9.06  | 8.6   | 10.2 | 8.8  | 4.02 | 17.94 | 5.23 | 10.06 | 12.34 | 8.28   |
| 233877 | 'Kctd13'        | 56.27 | 51    | 49.7 | 40.2 | 58.7 | 28.67 | 32.3 | 34.24 | 52.73 | 25.12  |
| 233878 | 'Sez6l2'        | 42.7  | 42.71 | 44.7 | 66.4 | 29.4 | 34.46 | 30.6 | 51.16 | 43.43 | 33.51  |
| 233879 | 'Asphd1'        | 16.3  | 7.11  | 17.3 | 11.9 | 10.3 | 5.21  | 11.6 | 13.72 | 8.8   | 15.49  |
| 233887 | 'Zfp553'        | 11.94 | 4.03  | 8.8  | 0.93 | 9.97 | 1.97  | 16.2 | 7.37  | 5.04  | 2.62   |
| 233890 | 'Zfp768'        | 0.04  | 0.11  | 2.65 | 0    | 0    | 3.95  | 0    | 4.88  | 0     | 4.9    |
| 233893 | 'Zfp764'        | 3.19  | 2.12  | 2.49 | 1.47 | 0.16 | 9.9   | 0.08 | 2.46  | 5.25  | 0.29   |
| 233895 | 'Prr14'         | 11.33 | 15.53 | 13.2 | 24.9 | 11.3 | 13.03 | 14.5 | 18.45 | 16.59 | 16.33  |
| 233899 | 'Ccdc189'       | 10.63 | 15.68 | 11   | 18.2 | 10.7 | 12.82 | 3.84 | 9.39  | 13.93 | 14.91  |
| 233900 | 'Rnf40'         | 6.07  | 10.41 | 3.97 | 15.6 | 8.83 | 1.95  | 8.38 | 6.76  | 9.14  | 15.06  |
| 233902 | 'Fbxl19'        | 1.75  | 0.71  | 3.16 | 0    | 3.6  | 5.49  | 1.63 | 0.86  | 0.14  | 3.38   |
| 233904 | 'Setd1a'        | 1.64  | 2.42  | 4.85 | 9.94 | 0.43 | 1.88  | 3    | 2.82  | 3.62  | 4.09   |
| 233905 | 'Zfp646'        | 0.31  | 0.61  | 0.02 | 1.92 | 1.38 | 0     | 0    | 1.25  | 0.38  | 1.47   |
| 233908 | 'Fus'           | 76.52 | 62.17 | 124  | 72.3 | 83.7 | 40.17 | 89.5 | 68.07 | 105.8 | 28.86  |
| 233912 | 'Armc5'         | 1.25  | 0.24  | 5.39 | 0    | 3.31 | 2.08  | 3.9  | 2.12  | 0     | 3.78   |
| 233913 | 'BC017158'      | 17.44 | 17.6  | 13.9 | 26.1 | 12.5 | 19.3  | 38.8 | 17.39 | 10.09 | 9.16   |
| 233919 | 'Gpr26'         | 4.76  | 2.03  | 0.51 | 0.02 | 0.84 | 5.78  | 0.02 | 0.02  | 0     | 2.78   |
| 233977 | 'Ppfia1'        | 0.03  | 2.75  | 2.79 | 1.19 | 4.36 | 2.95  | 0.54 | 5.53  | 3.97  | 3.42   |
| 233979 | 'Tpcn2'         | 0     | 5.03  | 1.92 | 0    | 2.14 | 3.05  | 0    | 3.3   | 0.3   | 0      |
| 233987 | 'Zfp958'        | 3.89  | 2.07  | 6.9  | 0    | 3.97 | 6.67  | 0    | 4.26  | 1.57  | 5.59   |
| 234023 | 'Arglu1'        | 93.85 | 86.98 | 102  | 125  | 169  | 33.16 | 61.1 | 63.94 | 102.9 | 117.71 |
| 234069 | 'Pcid2'         | 11.6  | 23.03 | 14   | 8.06 | 5.94 | 28.9  | 8.01 | 31.24 | 6.79  | 14.26  |
| 234072 | 'Adprhl1'       | 0.45  | 0.52  | 1.09 | 1.08 | 1.53 | 1.26  | 0.47 | 1.19  | 2.32  | 1.2    |
| 234076 | 'Tmco3'         | 13.46 | 29.52 | 32   | 35.4 | 12.1 | 25.5  | 38.9 | 27.93 | 27.51 | 17.3   |
| 234086 | 'Erich1'        | 10.62 | 10.92 | 5.76 | 24.3 | 14.5 | 16.23 | 5.94 | 5.17  | 14.16 | 6.16   |
| 234094 | 'Arhgef10'      | 1.58  | 0.55  | 0.54 | 0.66 | 1.99 | 3.37  | 0.29 | 0     | 0.45  | 0.72   |
| 234129 | 'Tpte'          | 0     | 0     | 0.03 | 0    | 0    | 0     | 0    | 0     | 0     | 0      |
| 234130 | 'Dkk4'          | 0     | 0     | 0.52 | 0    | 0    | 0     | 0    | 0     | 0     | 0.1    |
| 234135 | 'Nsd3'          | 30.19 | 31.45 | 11.2 | 40.4 | 33.4 | 26.64 | 18.2 | 25.31 | 27.6  | 30.02  |
| 234138 | 'Tti2'          | 7.56  | 9.04  | 14.2 | 14.2 | 3.36 | 7.58  | 12.6 | 8.26  | 16.21 | 14.15  |
| 234155 | 'Mboat4'        | 1.62  | 0.08  | 0    | 0    | 2.02 | 0     | 0.11 | 0     | 2.35  | 5.74   |
| 234199 | 'Fgl1'          | 0     | 6.36  | 1.68 | 16.2 | 0    | 11.28 | 0    | 0     | 0     | 3.03   |
| 234214 | 'Sorbs2'        | 8.4   | 4.65  | 13.9 | 6.87 | 7.2  | 9.23  | 10.4 | 11.24 | 5.24  | 18.17  |
| 234219 | 'Helt'          | 0     | 0     | 0.11 | 0    | 0    | 0     | 0    | 0     | 0     | 0      |
| 234267 | 'Gpm6a'         | 430.5 | 507.2 | 397  | 335  | 300  | 276.6 | 526  | 451   | 310.6 | 391.33 |



|        |                 |       |       |      |      |      |       |      |       |       |        |
|--------|-----------------|-------|-------|------|------|------|-------|------|-------|-------|--------|
| 234847 | 'Spg7'          | 7.31  | 5.17  | 8.47 | 8.97 | 13.9 | 2.91  | 17.4 | 5.59  | 10.31 | 1.9    |
| 234852 | 'Chmp1a'        | 88.7  | 66.87 | 85.8 | 36.8 | 61.2 | 59.95 | 66   | 76.26 | 70.6  | 83.7   |
| 234854 | 'Cdk10'         | 53.74 | 44.14 | 44.5 | 55.5 | 35.9 | 50.53 | 41.8 | 59.42 | 38.31 | 66.09  |
| 234857 | 'Spire2'        | 0.02  | 0.1   | 4.17 | 0    | 8.96 | 0.43  | 0    | 0.74  | 0.05  | 0.38   |
| 234865 | 'Nup133'        | 8.46  | 6.64  | 12.6 | 2.11 | 5.21 | 3.99  | 14.1 | 5.09  | 4.78  | 10.85  |
| 234875 | 'Ttc13'         | 10.36 | 21.42 | 26.4 | 11.7 | 7.48 | 6.9   | 25.6 | 13.01 | 34.87 | 21.11  |
| 234878 | 'Map3k21'       | 0     | 0     | 0    | 0.01 | 0.03 | 0     | 0.01 | 0     | 0     | 0      |
| 234889 | 'Gucy1a2'       | 0.53  | 0.44  | 2.08 | 2.64 | 0.23 | 2.97  | 3.45 | 0.84  | 2.49  | 0.92   |
| 234912 | 'Cfap300'       | 16.33 | 9.34  | 2.36 | 0.6  | 6.36 | 0.24  | 0.97 | 8.78  | 7.24  | 11.22  |
| 234915 | 'Cep126'        | 0.42  | 0.38  | 0.04 | 3.57 | 3.32 | 1.78  | 0    | 0.37  | 1.48  | 1.79   |
| 234959 | 'Med17'         | 0.52  | 8.63  | 5.96 | 6.79 | 3.24 | 1.3   | 7.83 | 6.11  | 7.61  | 6.31   |
| 234964 | 'Deup1'         | 2.02  | 2.33  | 0.73 | 0    | 0.15 | 2.15  | 0.48 | 1.88  | 8.74  | 2.63   |
| 234967 | 'Slc36a4'       | 16.98 | 6.17  | 16.1 | 15.3 | 3.29 | 11.96 | 35.6 | 13.09 | 18.45 | 11.85  |
| 235028 | 'Zfp426'        | 14.68 | 3.97  | 10.3 | 5.44 | 15.3 | 0.8   | 4.64 | 11.8  | 7.86  | 9.06   |
| 235036 | 'Ppan'          | 21.07 | 14.2  | 17.1 | 29.3 | 2.5  | 15.55 | 18   | 10.23 | 26.29 | 25.01  |
| 235040 | 'Atg4d'         | 23.56 | 24.59 | 21.6 | 6.78 | 19.8 | 12.17 | 8.02 | 34.05 | 21.9  | 12.64  |
| 235041 | 'Kank2'         | 0     | 0.34  | 0.02 | 0    | 0    | 0     | 1.9  | 1.43  | 0     | 0      |
| 235043 | 'Tmem205'       | 74.73 | 47.15 | 59.5 | 13.5 | 44.3 | 66.78 | 29.3 | 62.05 | 38.47 | 65.39  |
| 235044 | 'Plppr2'        | 36.84 | 45.45 | 63.7 | 34.9 | 25.1 | 32.56 | 41.2 | 29.51 | 29.47 | 18.5   |
| 235047 | 'Zfp809'        | 10.44 | 2.68  | 1.51 | 7.61 | 3.47 | 9.24  | 6.5  | 2.88  | 0.44  | 5.99   |
| 235048 | 'Zfp599'        | 3.36  | 1.23  | 1.76 | 0.12 | 1.48 | 0.03  | 3.56 | 2.75  | 4.34  | 2      |
| 235050 | 'Zfp810'        | 1.55  | 1.47  | 5.64 | 0    | 3.71 | 1.25  | 5.52 | 4.51  | 1.26  | 4.68   |
| 235072 | 'Sept7'         | 139   | 180.4 | 109  | 99.1 | 139  | 151.6 | 158  | 136.2 | 154.1 | 171.28 |
| 235086 | 'Igsf9b'        | 4.25  | 3.55  | 5.12 | 4.56 | 8.77 | 7.72  | 1.64 | 5.02  | 7.79  | 5.33   |
| 235106 | 'Ntm'           | 94.58 | 128.3 | 160  | 68   | 146  | 130.5 | 99.7 | 105.3 | 72.98 | 95.29  |
| 235130 | 'Adamts15'      | 0     | 1.77  | 0.01 | 0    | 0    | 0     | 0    | 0.64  | 1.03  | 0.52   |
| 235132 | 'Zbtb44'        | 0.3   | 0.75  | 0.71 | 0.09 | 0.34 | 0.39  | 0.9  | 0.82  | 0.35  | 0.33   |
| 235134 | 'Nfrkb'         | 6.48  | 4.15  | 10.6 | 2.52 | 9.26 | 3.98  | 6.42 | 4.05  | 5.32  | 7      |
| 235135 | 'Tmem45b'       | 0     | 0     | 5.4  | 0    | 20.5 | 0     | 0    | 0     | 0.04  | 0      |
| 235169 | 'Foxred1'       | 22.11 | 33.31 | 41.6 | 40.8 | 28.5 | 22.92 | 35   | 47.13 | 28.75 | 17.65  |
| 235180 | 'Fez1'          | 204.8 | 211   | 197  | 228  | 209  | 239.3 | 303  | 291   | 198   | 188.35 |
| 235184 | 'Msantd2'       | 2.83  | 6.8   | 2.14 | 3.79 | 4.56 | 0.2   | 1.36 | 2.29  | 0.79  | 4.03   |
| 235281 | 'Scn3b'         | 41.03 | 40.69 | 27.9 | 19.3 | 46.5 | 6.79  | 54.3 | 20.26 | 33.24 | 23.25  |
| 235283 | 'Gramd1b'       | 3.94  | 5.38  | 2.44 | 2.29 | 0.81 | 2.5   | 5.03 | 4.01  | 4.15  | 3.32   |
| 235293 | 'Sc5d'          | 33.35 | 27.83 | 46   | 32.6 | 32.8 | 35.43 | 62   | 62.14 | 56.54 | 51.61  |
| 235300 | 'Tmem136'       | 4.46  | 5.24  | 2.47 | 2.11 | 3.37 | 0.82  | 0.61 | 1     | 1.86  | 2.46   |
| 235302 | 'D630033O11Rik' | 0     | 0.02  | 0    | 0    | 0    | 0     | 0    | 0     | 0     | 0      |
| 235312 | 'C1qtnf5'       | 6.19  | 3.93  | 0    | 18.8 | 1.56 | 0     | 0.03 | 0.26  | 0     | 2.13   |
| 235315 | 'Rnf214'        | 16.94 | 22.34 | 23.2 | 23.8 | 15.8 | 13.93 | 13.8 | 16.1  | 10.05 | 14.42  |
| 235320 | 'Zbtb16'        | 0.02  | 4.73  | 2.96 | 0.06 | 0.36 | 1.85  | 2.29 | 0.96  | 0.01  | 0.12   |
| 235323 | 'Usp28'         | 4.82  | 3.65  | 2.82 | 5.85 | 0.56 | 0.06  | 3.57 | 3.48  | 7.48  | 0.41   |
| 235330 | 'Ttc12'         | 1.25  | 1.27  | 0.52 | 0    | 0    | 0     | 0.8  | 2.67  | 0.02  | 0      |
| 235339 | 'Dlat'          | 37.06 | 36.52 | 47.1 | 22.3 | 37.9 | 25.11 | 51.2 | 51.68 | 33.38 | 46.63  |
| 235344 | 'Sik2'          | 2.42  | 2.42  | 5    | 1.66 | 0.09 | 0.63  | 4.08 | 1.76  | 1.91  | 0.6    |
| 235345 | '4833427G06Rik' | 2.6   | 0     | 0    | 0.08 | 0    | 0     | 0    | 1.43  | 0     | 0      |
| 235379 | 'Gldn'          | 0.69  | 4.93  | 3.03 | 10.6 | 1.11 | 1.86  | 0.11 | 0.38  | 0     | 8.1    |
| 235380 | 'Dmxl2'         | 5.27  | 4.99  | 8.97 | 14.8 | 7.41 | 4.46  | 4.7  | 2.64  | 4.59  | 3.12   |
| 235386 | 'Hykk'          | 0.11  | 1.36  | 0.6  | 0.05 | 1.3  | 0.02  | 0.03 | 0.12  | 0.03  | 1.71   |
| 235402 | 'Lingo1'        | 14.12 | 7.5   | 6.17 | 9.49 | 7.23 | 6.56  | 10.2 | 8.88  | 2.5   | 10.17  |
| 235406 | 'Snx33'         | 0     | 3.3   | 0    | 0.01 | 0    | 0.01  | 0    | 0.09  | 0     | 0      |
| 235415 | 'Cplx3'         | 0     | 0     | 5.3  | 0    | 0.02 | 0     | 0    | 0     | 0     | 0      |
| 235416 | 'Lman1l'        | 0     | 0.28  | 0    | 0    | 0    | 0     | 0    | 0     | 0     | 0      |
| 235431 | 'Coro2b'        | 9.29  | 15.38 | 14.8 | 9.54 | 8.61 | 1.4   | 5.42 | 8.33  | 12.95 | 8.77   |
| 235439 | 'Herc1'         | 6.71  | 5.18  | 8.09 | 15.1 | 7.79 | 7.98  | 7.95 | 4.3   | 7.28  | 9.53   |
| 235441 | 'Usp3'          | 3.46  | 7.08  | 3.33 | 8.72 | 3.57 | 4.56  | 11.2 | 10.62 | 5.93  | 7.27   |
| 235442 | 'Rab8b'         | 9.29  | 7.06  | 8.91 | 17.8 | 7.61 | 1.25  | 13.1 | 6.35  | 4.24  | 13.11  |
| 235459 | 'Gtf2a2'        | 78.9  | 67.66 | 117  | 139  | 82.7 | 68.97 | 50.1 | 82.12 | 49.75 | 81.32  |
| 235461 | 'Mindy2'        | 3.98  | 2.91  | 2.27 | 4.49 | 3.22 | 2.73  | 1.77 | 0.8   | 2.35  | 1.52   |



|        |                 |       |       |      |      |      |       |      |       |       |       |
|--------|-----------------|-------|-------|------|------|------|-------|------|-------|-------|-------|
| 236930 | 'Ercc6l'        | 0     | 0     | 0    | 0    | 0.14 | 0     | 0    | 0     | 0     | 0     |
| 237010 | 'Klhl4'         | 2.84  | 4.66  | 1.88 | 0    | 0    | 1.74  | 0    | 2.72  | 2.43  | 3.34  |
| 237029 | '4932411N23Rik' | 0.01  | 0     | 0.01 | 0.02 | 0.01 | 0     | 0    | 0     | 0.03  | 0     |
| 237038 | 'Nox1'          | 0     | 0     | 0    | 0    | 0.02 | 0     | 0    | 0     | 0     | 0.24  |
| 237052 | 'Tceal1'        | 72.9  | 94.35 | 61.5 | 102  | 65   | 76.93 | 55.8 | 84.48 | 57.94 | 91.12 |
| 237073 | 'Rbm41'         | 0.03  | 0.01  | 0.04 | 0.11 | 0.67 | 0.36  | 0    | 0.01  | 0.92  | 0.39  |
| 237082 | 'Nxt2'          | 18.15 | 12.81 | 23.3 | 6.59 | 15.8 | 15.42 | 19.2 | 18.09 | 24.43 | 17.38 |
| 237107 | 'Gnl3l'         | 117.6 | 115.9 | 123  | 106  | 76.7 | 75.91 | 116  | 108.1 | 87.08 | 96.28 |
| 237175 | 'Adgrg2'        | 0     | 0     | 0.85 | 1.84 | 0.11 | 3.01  | 1.51 | 0.87  | 1.42  | 0     |
| 237178 | 'Ppef1'         | 0.05  | 0.04  | 0    | 2.1  | 0    | 0     | 0    | 3.69  | 0     | 0     |
| 237211 | 'Fancb'         | 0     | 0     | 0    | 0    | 0    | 0.07  | 0    | 1.26  | 0.7   | 0.2   |
| 237213 | 'Glr2'          | 32.74 | 11.99 | 16.2 | 12.7 | 27.9 | 11.81 | 26.3 | 49.75 | 8.53  | 10.61 |
| 237221 | 'Gemin8'        | 15.9  | 10.31 | 12.6 | 10.6 | 4.03 | 15.64 | 3.34 | 7.16  | 3.12  | 13.8  |
| 237222 | 'Ofd1'          | 1.32  | 1.29  | 0.64 | 2.45 | 1.33 | 3.78  | 0    | 0.7   | 6.21  | 1.16  |
| 237253 | 'Lrp11'         | 19.85 | 17.39 | 15.1 | 23.3 | 17.6 | 9.79  | 15.9 | 10.94 | 29.87 | 6.93  |
| 237300 | 'Gm4922'        | 0     | 0     | 1.45 | 0    | 0    | 0.04  | 0    | 0.02  | 0     | 0.29  |
| 237320 | 'Aldh8a1'       | 0     | 0     | 0    | 2.05 | 0    | 0     | 0    | 0     | 0     | 0.02  |
| 237336 | 'Tbpl1'         | 39.7  | 41.73 | 42.8 | 30.6 | 46.5 | 22.01 | 35.2 | 17.37 | 43.95 | 27.71 |
| 237339 | 'L3mbtl3'       | 2.82  | 7.97  | 1.26 | 2.05 | 1.44 | 0.01  | 3.27 | 6.55  | 2.54  | 3.66  |
| 237353 | 'Sh3rf3'        | 0.2   | 0.98  | 0    | 0.73 | 0    | 0     | 0.01 | 0.04  | 0.09  | 0     |
| 237360 | 'Adamts14'      | 0     | 0     | 0    | 0    | 0    | 0.07  | 0    | 0     | 0     | 0     |
| 237362 | 'Npffr1'        | 0.09  | 4.92  | 3.43 | 0.27 | 11.3 | 0.07  | 2.3  | 4.19  | 0.04  | 2.33  |
| 237387 | 'Lrrc3'         | 1.82  | 1.85  | 5.06 | 1.33 | 0.22 | 3.75  | 2.46 | 0.02  | 0.25  | 0.19  |
| 237397 | 'C2cd4c'        | 0.01  | 1.77  | 0.29 | 0.5  | 0.01 | 0     | 2.52 | 1.77  | 0.02  | 0.17  |
| 237400 | 'Mex3d'         | 1.48  | 0.22  | 1.66 | 11.7 | 1.35 | 0     | 0    | 0.21  | 0.01  | 0     |
| 237403 | 'Lingo3'        | 6.45  | 3.67  | 9.31 | 0    | 12.8 | 1.16  | 14.6 | 5.41  | 5.72  | 0.29  |
| 237411 | 'Zfp938'        | 5.39  | 12.89 | 5.9  | 4.55 | 15.8 | 8.11  | 9.63 | 12.42 | 11.78 | 16.43 |
| 237412 | 'Gm4924'        | 4.62  | 8.34  | 1.91 | 0.09 | 5.57 | 0.08  | 3.38 | 3.7   | 3.46  | 1.72  |
| 237422 | 'Ric8b'         | 18.18 | 24.08 | 19.4 | 26.3 | 7.28 | 4.28  | 13.7 | 17.98 | 17.81 | 13.06 |
| 237433 | 'Gm4925'        | 0     | 0     | 0    | 0    | 0.29 | 0.38  | 0    | 1.97  | 0     | 0     |
| 237436 | 'Gas2l3'        | 0.45  | 0.36  | 0.88 | 1.52 | 1.62 | 0.56  | 0.33 | 0.34  | 1.07  | 0.48  |
| 237459 | 'Cdk17'         | 4.39  | 2.2   | 1.72 | 0.51 | 4.85 | 5.31  | 3.02 | 2.7   | 8.58  | 8     |
| 237465 | 'Ccadc38'       | 0.08  | 0.2   | 0.23 | 0    | 0.37 | 0.06  | 0.14 | 0.19  | 0.28  | 1.28  |
| 237500 | 'Tmtc3'         | 4.02  | 0.5   | 2.29 | 3.74 | 5.03 | 5.32  | 0.3  | 0.34  | 4.83  | 3.77  |
| 237504 | 'Rassf9'        | 0     | 0     | 0    | 0    | 0    | 0     | 0    | 0     | 0     | 0.12  |
| 237523 | 'Ptprq'         | 0.81  | 0     | 0    | 0    | 0    | 0     | 0    | 0     | 0     | 0     |
| 237542 | 'Osbp18'        | 3.03  | 7.08  | 4.18 | 3.97 | 1.78 | 3.32  | 5.56 | 6.22  | 6.3   | 5.16  |
| 237553 | 'Trhde'         | 1.5   | 1.66  | 0.21 | 1.98 | 1.41 | 1.24  | 0.93 | 0     | 2.98  | 2.04  |
| 237558 | 'Myrf1'         | 0     | 0     | 0    | 0    | 0    | 0     | 0    | 0     | 0     | 0.01  |
| 237560 | 'Lrrc10'        | 0     | 1.2   | 0    | 0.08 | 0.03 | 0.07  | 0.04 | 0     | 0.03  | 0.06  |
| 237611 | 'Stac3'         | 0.97  | 2.88  | 0    | 2.09 | 0.66 | 3.08  | 1.71 | 0     | 10.89 | 11.69 |
| 237615 | 'Ankrd52'       | 2.02  | 1.34  | 1.29 | 2.39 | 0.66 | 1.16  | 1.61 | 0.21  | 2.66  | 1.35  |
| 237625 | 'Pla2g3'        | 1.98  | 0.64  | 5.21 | 0    | 0    | 0     | 0    | 0     | 0.81  | 1.42  |
| 237711 | 'Eml6'          | 3.33  | 2.79  | 4.91 | 6.01 | 1.65 | 0.84  | 2.91 | 1.92  | 3.25  | 2.52  |
| 237716 | 'Gpr75'         | 3.96  | 2.99  | 6.46 | 4.8  | 5.29 | 0.01  | 4.89 | 1.67  | 2.61  | 2.72  |
| 237730 | 'Fbl11'         | 6.11  | 4.07  | 4.73 | 13   | 7.98 | 12.15 | 16.6 | 3.78  | 16.21 | 3.85  |
| 237758 | 'Zfp454'        | 0.89  | 1.28  | 6.21 | 0    | 3.24 | 0     | 0    | 1.59  | 4.64  | 0.14  |
| 237759 | 'Col23a1'       | 0     | 0.28  | 0    | 0.45 | 3.64 | 0.02  | 0.21 | 0     | 0     | 1.55  |
| 237761 | 'Sowaha'        | 7.79  | 1.97  | 4.53 | 3.96 | 7.28 | 4.26  | 4.81 | 0.02  | 0.01  | 1.06  |
| 237775 | 'Zfp867'        | 4     | 2.56  | 1.92 | 5.52 | 2.36 | 0.3   | 7.97 | 6.55  | 7.57  | 3.93  |
| 237781 | 'Mief2'         | 3.25  | 8.74  | 14.6 | 16.2 | 12.6 | 12.36 | 8.43 | 8.75  | 14.19 | 9.34  |
| 237782 | 'Smcr8'         | 0.01  | 0.78  | 2.67 | 4.17 | 0.11 | 0.01  | 0.15 | 0.02  | 0.75  | 1.06  |
| 237806 | 'Dnah9'         | 0.99  | 0.3   | 0.08 | 0.48 | 0.31 | 0.05  | 0.16 | 0.07  | 0.83  | 0.14  |
| 237823 | 'Pfas'          | 14.73 | 16.73 | 9.53 | 12.4 | 13.9 | 10.68 | 7.55 | 15.35 | 11.15 | 11.92 |
| 237831 | 'Slc13a5'       | 2.7   | 0     | 2.75 | 0    | 0    | 0     | 4.5  | 0     | 2.95  | 1.96  |
| 237847 | 'Rtn4rl1'       | 0.01  | 1.36  | 9.78 | 0    | 5.04 | 8.58  | 0    | 1.69  | 8.03  | 17.48 |
| 237858 | 'Trarg1'        | 2.74  | 0     | 0    | 0    | 1.67 | 0     | 0.02 | 0.01  | 0     | 0     |
| 237859 | 'Nsrp1'         | 11.28 | 13.49 | 9.44 | 5.6  | 15.8 | 8.03  | 6.55 | 8.83  | 7.82  | 12.75 |

|        |                 |       |       |      |      |      |       |      |       |       |        |
|--------|-----------------|-------|-------|------|------|------|-------|------|-------|-------|--------|
| 237860 | 'Ssh2'          | 1.99  | 2.56  | 0.93 | 0.1  | 2.62 | 1.94  | 1.86 | 1.2   | 1.97  | 0.75   |
| 237868 | 'Sarm1'         | 8.96  | 8.37  | 8.07 | 7.53 | 8.35 | 5.53  | 6.38 | 6.37  | 3.24  | 7.04   |
| 237877 | 'Atad5'         | 1.43  | 2.72  | 0.14 | 1.9  | 0.5  | 0.37  | 0.01 | 2.18  | 0.39  | 2.5    |
| 237880 | '1700071K01Rik' | 0     | 0     | 3.54 | 0    | 0    | 0     | 0    | 0.96  | 0     | 0      |
| 237886 | 'Slnf9'         | 0.35  | 0.41  | 0.41 | 2.43 | 0.62 | 0.53  | 0.53 | 0.28  | 0.46  | 0.32   |
| 23789  | 'Coro1b'        | 38.18 | 60.42 | 33.2 | 28.3 | 44.5 | 38.96 | 41.1 | 43.04 | 38.81 | 29.69  |
| 237891 | 'Gas2l2'        | 1.21  | 1.26  | 0.44 | 0    | 0.18 | 0     | 0    | 0     | 0     | 0.44   |
| 237898 | 'Usp32'         | 0.89  | 3.86  | 2.23 | 8.97 | 2.31 | 0.05  | 1.56 | 3.09  | 3.62  | 3.55   |
| 23790  | 'Coro1c'        | 27.39 | 31.83 | 50.4 | 52.9 | 39.4 | 39.3  | 43.1 | 45.87 | 41.95 | 34.25  |
| 237911 | 'Brip1'         | 0.27  | 0.4   | 0.55 | 0.3  | 0.4  | 0.34  | 0.35 | 0.33  | 0.33  | 0.42   |
| 23792  | 'Adam23'        | 3.12  | 1.74  | 2.06 | 1.08 | 5.15 | 0.88  | 3.96 | 2.16  | 7.73  | 1.71   |
| 237926 | 'Rsad1'         | 2.93  | 2.79  | 1.99 | 0    | 4.84 | 0     | 9.48 | 1.51  | 7.48  | 2.25   |
| 237928 | 'Phospho1'      | 0     | 0     | 0    | 0    | 0.03 | 0     | 0    | 0.04  | 0     | 0      |
| 23794  | 'Adamts5'       | 0.73  | 0     | 0    | 0    | 0    | 0.24  | 0.04 | 0     | 0     | 0      |
| 237940 | 'Aoc2'          | 0.12  | 0.09  | 0.13 | 3.99 | 1.14 | 0.11  | 0.04 | 0.08  | 0.18  | 0.02   |
| 237943 | 'Gpatch8'       | 10.73 | 5.77  | 7.22 | 8.05 | 10.5 | 6.76  | 7.99 | 6.65  | 5.53  | 5.24   |
| 23795  | 'Agr2'          | 0     | 0.4   | 0    | 0    | 0    | 0     | 0    | 0     | 0     | 0      |
| 23796  | 'Aplnr'         | 21.2  | 11.4  | 30.5 | 25.2 | 13.1 | 151.1 | 113  | 252.8 | 102.1 | 233.41 |
| 23797  | 'Akt3'          | 4.72  | 2.75  | 4.33 | 4.13 | 6.71 | 2.34  | 2.71 | 0.38  | 5.14  | 0.91   |
| 237979 | 'Sdk2'          | 1.51  | 1.37  | 0.06 | 2.07 | 0.47 | 0.01  | 0    | 0.46  | 0.61  | 0.34   |
| 237988 | 'Cdr2l'         | 1.88  | 1.41  | 6.09 | 0    | 2.05 | 1.5   | 4.67 | 1.31  | 4.44  | 1.16   |
| 23801  | 'Aloxe3'        | 4.46  | 7.01  | 3.33 | 3.01 | 2.99 | 4.9   | 7.37 | 1.9   | 6.9   | 14.89  |
| 23802  | 'Amfr'          | 15.13 | 13.89 | 20.2 | 23.3 | 15   | 12.66 | 25.3 | 3.85  | 13.59 | 12.07  |
| 238021 | 'Fscn2'         | 0.75  | 0.45  | 0    | 5.21 | 0    | 0     | 0    | 0.47  | 0     | 0.32   |
| 238023 | 'Hexdc'         | 2.66  | 15.53 | 14.9 | 24   | 5.4  | 12.32 | 19.3 | 15.66 | 2.58  | 5.43   |
| 238024 | 'Fn3krp'        | 4.16  | 5.91  | 6.44 | 2.05 | 3.19 | 6.71  | 3.55 | 1.73  | 3.99  | 3.9    |
| 238037 | 'Wdcp'          | 5.37  | 4.73  | 7.22 | 7.64 | 2.21 | 3.73  | 1.63 | 5.67  | 5.26  | 3.37   |
| 23805  | 'Apc2'          | 8.61  | 7.44  | 12.1 | 9.64 | 8.11 | 3.28  | 4.87 | 7.79  | 7.44  | 15     |
| 23806  | 'Arih1'         | 1.03  | 3.24  | 5.24 | 4.81 | 0.61 | 1.88  | 4.02 | 2.84  | 0.48  | 2.31   |
| 23807  | 'Arih2'         | 16.61 | 12.98 | 14.8 | 13.7 | 21.2 | 9.19  | 14   | 12.7  | 13.23 | 16.45  |
| 238076 | 'Kcns3'         | 0.02  | 2.66  | 0.51 | 0    | 0.03 | 5.84  | 6.35 | 3.42  | 0     | 0      |
| 23808  | 'Ash2l'         | 11.5  | 4.05  | 7.56 | 42.5 | 6.56 | 11    | 12.2 | 8.82  | 10.7  | 11.33  |
| 238123 | 'Cog5'          | 8.64  | 6.8   | 14.9 | 15.5 | 0.51 | 6.86  | 2.76 | 12.11 | 13.93 | 4.15   |
| 238130 | 'Dock4'         | 2.58  | 2.09  | 0.66 | 0.12 | 1.46 | 0.2   | 1.29 | 0.2   | 0.33  | 0.29   |
| 238161 | 'Akap6'         | 14.06 | 11.94 | 15.8 | 12.5 | 11.4 | 9.16  | 11.6 | 9.97  | 12.29 | 14.53  |
| 238205 | 'Lrfn5'         | 24.78 | 18.83 | 27   | 18.9 | 10.2 | 9.35  | 26.6 | 21.42 | 15.93 | 21.56  |
| 23821  | 'Bace1'         | 16.59 | 14.34 | 14.4 | 9.13 | 6.86 | 10.65 | 14.7 | 7.31  | 12.33 | 10.78  |
| 238247 | 'Arid4a'        | 24.98 | 21.12 | 13.3 | 47.7 | 26.7 | 27.35 | 36.2 | 22.81 | 22.44 | 26.85  |
| 23825  | 'Banf1'         | 143.5 | 139.5 | 109  | 149  | 121  | 114   | 119  | 146.3 | 102.2 | 117.83 |
| 238252 | 'Gpr135'        | 2.68  | 12.37 | 3.31 | 5.28 | 2.08 | 14.46 | 20.7 | 6.24  | 3.94  | 16.52  |
| 238257 | 'Tmem30b'       | 0     | 0     | 0    | 0    | 1.54 | 0     | 0    | 0     | 0     | 0      |
| 238266 | 'Syt16'         | 3.52  | 28.66 | 28.2 | 13.3 | 7.63 | 7.99  | 29.9 | 35.41 | 8.35  | 7.61   |
| 23827  | 'Bpnt1'         | 50.66 | 62.88 | 37.1 | 29.7 | 33.7 | 38.57 | 29.8 | 57    | 25.82 | 50.8   |
| 238271 | 'Kcni5'         | 1.94  | 2.8   | 3.99 | 0.01 | 5.6  | 0.65  | 1.8  | 2.52  | 6.21  | 4.11   |
| 238276 | 'Akap5'         | 2.21  | 1.8   | 1.11 | 4.77 | 0.77 | 2.89  | 6.19 | 2.43  | 2.62  | 0.79   |
| 23828  | 'Bves'          | 0     | 0     | 1.43 | 0    | 0    | 0     | 0    | 0.35  | 0     | 0      |
| 23829  | 'C1ql1'         | 1.23  | 0     | 0    | 0    | 3.79 | 9.54  | 0    | 0     | 5.93  | 3.96   |
| 23830  | 'Capn10'        | 13.15 | 18.66 | 33.3 | 19.1 | 17.1 | 29.52 | 17.9 | 8.09  | 20.69 | 4.02   |
| 23831  | 'Car14'         | 2.18  | 4.57  | 0.09 | 0.04 | 0.09 | 7.37  | 0    | 5.07  | 0.05  | 0.05   |
| 238317 | 'Elmsan1'       | 0.79  | 3.91  | 1.66 | 0.01 | 0.76 | 0.47  | 1.46 | 0.03  | 0.21  | 0.29   |
| 23832  | 'Xcr1'          | 0.55  | 0.14  | 0.08 | 0.16 | 0.1  | 0.09  | 0.06 | 0.06  | 0.03  | 0.08   |
| 238323 | 'Rps6kl1'       | 31.68 | 44.21 | 39.2 | 21   | 33   | 25.64 | 24   | 37.79 | 45.33 | 54.91  |
| 238328 | 'Vash1'         | 0.16  | 1.11  | 0.54 | 2.94 | 4.46 | 2.38  | 3.65 | 1.87  | 1.43  | 0.74   |
| 23833  | 'Cd52'          | 12.51 | 1.27  | 2.55 | 19.6 | 4.55 | 33.03 | 0    | 1.87  | 0     | 0      |
| 238330 | 'Irf2bp1'       | 10.35 | 10.01 | 12.6 | 6.53 | 5.97 | 9.33  | 5.56 | 8.11  | 7.05  | 8.79   |
| 238331 | 'Zdhhc22'       | 34.5  | 54.28 | 23.3 | 50.1 | 54.3 | 28.33 | 64.5 | 47.33 | 7.74  | 5.71   |
| 238333 | 'Samd15'        | 0.64  | 2.63  | 0.11 | 1.33 | 0.26 | 0.03  | 1.17 | 0.44  | 2.54  | 2.73   |
| 23834  | 'Cdc6'          | 0     | 0     | 0    | 0    | 0.02 | 0     | 4.94 | 0     | 0     | 0.02   |

|        |              |       |       |      |      |      |       |      |       |       |        |
|--------|--------------|-------|-------|------|------|------|-------|------|-------|-------|--------|
| 23836  | 'Cdh20'      | 4.7   | 8.65  | 0.03 | 0.35 | 0    | 0.58  | 3.75 | 1.21  | 4.66  | 6.41   |
| 23837  | 'Cfdp1'      | 204.2 | 127.7 | 136  | 179  | 127  | 161.7 | 135  | 158.9 | 129.1 | 140.85 |
| 238377 | 'Gpr68'      | 3.51  | 0.94  | 10.5 | 0.1  | 2.83 | 10.55 | 0.07 | 1.98  | 4.78  | 4.42   |
| 238384 | 'Slc24a4'    | 0     | 0     | 0    | 1.37 | 2.02 | 0     | 0.04 | 0     | 0     | 0.01   |
| 238386 | 'Btdb7'      | 0.63  | 0.72  | 1.94 | 5.88 | 0.88 | 2.24  | 0.01 | 0.66  | 0.75  | 0.24   |
| 238393 | 'Serpina3f'  | 0.02  | 1.91  | 0.09 | 0    | 0    | 0     | 0    | 0     | 0     | 0      |
| 23844  | 'Clca1'      | 0     | 0     | 0    | 0    | 0.78 | 0     | 0    | 0     | 0     | 0      |
| 23845  | 'Clec5a'     | 0     | 0.72  | 0    | 0    | 3.9  | 0.55  | 2.83 | 0.02  | 0     | 0      |
| 23849  | 'Klf6'       | 8.33  | 29.5  | 28.9 | 88   | 15.9 | 17.18 | 20.5 | 16.09 | 17.6  | 18.37  |
| 23850  | 'Pappa2'     | 0     | 0     | 0.17 | 0    | 0    | 0     | 0    | 0     | 0     | 0      |
| 238505 | 'Mtr'        | 2.16  | 0.8   | 0.02 | 0.01 | 1.75 | 0.56  | 4.1  | 0     | 3.02  | 0.53   |
| 23853  | 'Def6'       | 2.55  | 1.62  | 0    | 0    | 0    | 5.32  | 0    | 0     | 2.23  | 5.24   |
| 23854  | 'Def8'       | 19.42 | 23.13 | 30.3 | 3.73 | 19.5 | 8.42  | 11.2 | 8.1   | 18.89 | 13.61  |
| 23855  | 'Defa17'     | 0     | 0     | 0    | 0    | 0    | 0     | 34.3 | 0     | 0     | 0      |
| 238555 | 'Btn2a2'     | 0     | 0     | 0    | 0    | 0    | 0     | 0    | 0     | 0.87  | 0      |
| 23856  | 'Dido1'      | 6.93  | 4.99  | 2.62 | 9.48 | 8.85 | 7.15  | 2.16 | 4.91  | 11.84 | 8.28   |
| 238564 | 'Mylk4'      | 0.03  | 0     | 0.1  | 0.05 | 0.04 | 0.02  | 0.01 | 0     | 0.02  | 0.01   |
| 23857  | 'Dmtf1'      | 12.55 | 10.22 | 20.8 | 17   | 23.1 | 8.74  | 7.16 | 15.72 | 12.12 | 26.76  |
| 23859  | 'Dlg2'       | 9.42  | 8.11  | 8.18 | 6.06 | 9.78 | 14.32 | 5.25 | 7.1   | 13.17 | 19.14  |
| 23863  | 'Dand5'      | 2.05  | 0.95  | 6.87 | 0    | 5.78 | 11.11 | 5.3  | 15.15 | 13.31 | 20.22  |
| 238663 | 'Spata31d1d' | 0     | 0     | 0    | 0    | 0    | 1.64  | 0    | 0     | 0     | 0      |
| 238673 | 'Zfp367'     | 5.3   | 5.67  | 4.89 | 0.68 | 7.01 | 3.69  | 4.41 | 2.18  | 0.85  | 4.45   |
| 238680 | 'Cntnap3'    | 0     | 0.14  | 1.92 | 0    | 1.18 | 0     | 0.23 | 0     | 0     | 0      |
| 238690 | 'Zfp458'     | 1.91  | 1.43  | 0.34 | 0.26 | 0.84 | 0.55  | 2.27 | 0.09  | 1.42  | 0.77   |
| 238692 | 'Zfp874a'    | 4.77  | 2.82  | 3.43 | 0    | 1.92 | 4.73  | 0    | 4.48  | 0     | 6.54   |
| 238693 | 'Zfp58'      | 0     | 7.73  | 1.1  | 0    | 6.35 | 3.56  | 3.7  | 2     | 2.72  | 5.04   |
| 23871  | 'Ets1'       | 0     | 0     | 0    | 0    | 0.01 | 0     | 2.02 | 0     | 0     | 0      |
| 23872  | 'Ets2'       | 40.49 | 54.69 | 35   | 27.3 | 21.9 | 23.4  | 42.2 | 50.1  | 18.63 | 37.36  |
| 238722 | 'Zfp72'      | 3.15  | 2.92  | 4.02 | 0    | 2.78 | 1.19  | 4.59 | 4.22  | 6.6   | 3.57   |
| 238725 | 'Gpr150'     | 0.57  | 1.77  | 2.67 | 0    | 3.33 | 0.98  | 0    | 2.13  | 1.62  | 2.68   |
| 238726 | 'Fam81b'     | 1.56  | 0     | 0    | 0    | 0    | 0     | 0    | 0     | 0     | 0      |
| 23873  | 'Faim'       | 44.72 | 76.73 | 53.2 | 66   | 64.7 | 72.23 | 62.6 | 23.67 | 56.54 | 52.13  |
| 23874  | 'Farsb'      | 117.1 | 95.54 | 73.1 | 67.8 | 47.6 | 83.09 | 106  | 73.83 | 82.5  | 87.2   |
| 23876  | 'Fbln5'      | 15.37 | 6.25  | 0.02 | 0.02 | 0    | 5.23  | 12.9 | 1.95  | 0     | 0      |
| 23877  | 'Fiz1'       | 9.4   | 2.27  | 7.49 | 4.23 | 11.8 | 7.52  | 2.34 | 2.21  | 1.57  | 5.01   |
| 23879  | 'Fxr2'       | 14.15 | 17.95 | 10.2 | 0    | 22.6 | 4.99  | 5.54 | 13.21 | 11.07 | 8.19   |
| 238799 | 'Tnpo1'      | 4.91  | 4.84  | 5.07 | 7.56 | 1.8  | 2.16  | 3.59 | 3.55  | 4.38  | 5.08   |
| 23880  | 'Fyb'        | 0     | 0     | 1.25 | 0.63 | 1.66 | 9.52  | 0.01 | 1.54  | 0     | 0      |
| 23881  | 'G3bp2'      | 157.2 | 151   | 118  | 74.1 | 159  | 146.8 | 167  | 157.3 | 154   | 166.39 |
| 23882  | 'Gadd45g'    | 93.13 | 305   | 263  | 490  | 58   | 133.7 | 22.5 | 141.6 | 82.93 | 147.39 |
| 238831 | 'Ppwd1'      | 2.33  | 2.33  | 2.35 | 0.99 | 5.93 | 2.46  | 2.21 | 1.5   | 3.41  | 5.13   |
| 23885  | 'Gmcl1'      | 7.71  | 0.72  | 2.56 | 6.09 | 7.89 | 1.91  | 2.16 | 4.8   | 5.45  | 3      |
| 23886  | 'Gdf15'      | 0     | 3.01  | 0    | 0    | 0.98 | 0     | 0    | 0     | 0     | 0      |
| 23887  | 'Ggt5'       | 0.31  | 6.45  | 0    | 0    | 0.03 | 0     | 0    | 1.65  | 0     | 0      |
| 238871 | 'Pde4d'      | 2.28  | 3.35  | 5.1  | 7.53 | 2.91 | 3.78  | 7.87 | 3.36  | 5.35  | 1.84   |
| 238875 | 'Gapt'       | 0     | 0     | 0    | 0    | 0.07 | 0     | 0    | 0     | 0     | 0      |
| 23888  | 'Gpc6'       | 0.45  | 0.39  | 1.03 | 0.02 | 1.58 | 1.04  | 0.51 | 0.66  | 0.09  | 0.38   |
| 238896 | 'Cdc20b'     | 0     | 0.02  | 0    | 0    | 0    | 0     | 0    | 0     | 0     | 0      |
| 23890  | 'Gpr34'      | 0.23  | 0.25  | 0    | 7.71 | 6.77 | 19.41 | 0    | 0.04  | 0     | 1.76   |
| 23892  | 'Grem1'      | 0     | 2.99  | 4.12 | 9.66 | 0    | 8.69  | 0    | 0     | 5.68  | 0      |
| 23893  | 'Grem2'      | 0.22  | 0.57  | 1.42 | 0.56 | 3.37 | 0.6   | 3.13 | 0.87  | 3.35  | 1.18   |
| 23894  | 'Gtf2h2'     | 23.02 | 26.3  | 18.3 | 60.8 | 23   | 55.58 | 24.7 | 28.77 | 64.8  | 39.22  |
| 23897  | 'Hax1'       | 101.3 | 145.2 | 108  | 129  | 104  | 210.9 | 158  | 128.8 | 105.7 | 122.09 |
| 238988 | 'Erc2'       | 9.01  | 10.94 | 8.93 | 6.73 | 12.6 | 11.06 | 13.8 | 8.61  | 15.36 | 7.02   |
| 239017 | 'Ogdhl'      | 16.75 | 20.19 | 52.9 | 17.5 | 14.3 | 6.57  | 27.8 | 14.61 | 33.56 | 19.13  |
| 239027 | 'Arhgap22'   | 3.78  | 0.44  | 4.68 | 6.1  | 1.07 | 4.92  | 6.01 | 0     | 7.47  | 0.67   |
| 23908  | 'Hs2st1'     | 5.31  | 8.72  | 2.37 | 10.6 | 1.45 | 0     | 0.01 | 2.96  | 0.99  | 0.43   |
| 239096 | 'Cdh24'      | 0.27  | 1.69  | 0.07 | 0    | 0    | 0.11  | 2.08 | 0     | 0     | 0      |





|        |           |       |       |      |      |      |       |      |       |       |        |
|--------|-----------|-------|-------|------|------|------|-------|------|-------|-------|--------|
| 23959  | 'Nt5e'    | 0     | 0.05  | 0    | 0.61 | 0    | 0     | 4.35 | 1.6   | 0     | 0      |
| 239591 | 'Ttl8'    | 0.13  | 0.12  | 0.31 | 0.02 | 0    | 0     | 0    | 0.01  | 0.52  | 0.83   |
| 23960  | 'Oas1g'   | 0     | 0     | 0    | 1.96 | 0    | 0     | 0    | 0     | 0     | 0      |
| 239606 | 'Slc2a13' | 1.33  | 1.27  | 4.89 | 0.03 | 0.94 | 2.32  | 2.81 | 0.63  | 1.87  | 2.78   |
| 239611 | 'Muc19'   | 0     | 0.01  | 0    | 0    | 0    | 0     | 0    | 0     | 0     | 0      |
| 239618 | 'Pdzn4'   | 13.9  | 28.93 | 8.98 | 5.06 | 6.94 | 4.43  | 14   | 14.46 | 4.43  | 2.67   |
| 23962  | 'Oasl2'   | 0.02  | 3.18  | 7.26 | 86.5 | 0    | 0.02  | 6.41 | 2.3   | 17.93 | 10.9   |
| 23963  | 'Tenm1'   | 10.82 | 6.69  | 9.55 | 5.14 | 10.3 | 7.7   | 11.7 | 8.92  | 11.41 | 9.35   |
| 23964  | 'Tenm2'   | 8.06  | 3.54  | 7.44 | 2.31 | 16   | 3.93  | 7.01 | 6.95  | 0.94  | 1.27   |
| 239647 | 'Pced1b'  | 7.84  | 2.64  | 2.74 | 0.31 | 0.19 | 4.18  | 2.89 | 4     | 0.29  | 2.23   |
| 23965  | 'Tenm3'   | 2.04  | 1.27  | 1.86 | 7.44 | 3.07 | 1.61  | 7.46 | 0.82  | 0.48  | 1.24   |
| 239650 | 'Ccdc184' | 33.32 | 34.98 | 80.8 | 93   | 31.6 | 28.76 | 44.3 | 52.58 | 34.21 | 32.89  |
| 239652 | 'Zfp641'  | 1.71  | 1.96  | 5.37 | 0    | 2.29 | 1.11  | 3.24 | 3.19  | 0.13  | 2.76   |
| 23966  | 'Tenm4'   | 1.9   | 5.99  | 6.18 | 3.18 | 7.66 | 4.34  | 9.14 | 3.64  | 4.93  | 2.48   |
| 239667 | 'Dip2b'   | 1.72  | 0.71  | 3.34 | 9.17 | 1.64 | 1.62  | 3.33 | 1.5   | 2     | 1      |
| 23967  | 'Osr1'    | 0.02  | 0     | 0    | 0    | 0    | 0     | 0    | 0     | 0     | 0      |
| 239673 | 'Krt90'   | 11.18 | 59.19 | 0.02 | 24.8 | 0.04 | 0     | 0    | 26.18 | 0.07  | 9.78   |
| 23968  | 'Nlrp5'   | 0     | 0     | 0.1  | 0    | 0    | 0     | 0    | 0     | 0     | 0      |
| 23969  | 'Pacsin1' | 85.08 | 65.44 | 76.8 | 29.8 | 113  | 87.09 | 63.9 | 81.3  | 60.3  | 78.75  |
| 23970  | 'Pacsin2' | 4.57  | 6.33  | 30.3 | 25.6 | 22.6 | 13.93 | 26   | 9.12  | 29.91 | 12.29  |
| 239706 | 'Mettl22' | 27.9  | 41.27 | 49.9 | 12.6 | 34.9 | 73.51 | 31.1 | 64.52 | 56.39 | 41.27  |
| 23971  | 'Papss1'  | 19.31 | 32.86 | 36.3 | 8.85 | 22.5 | 26.28 | 36.6 | 17.29 | 23.07 | 43.38  |
| 239719 | 'Mkl2'    | 26.1  | 17.95 | 17   | 35.9 | 24.9 | 12.61 | 22.8 | 17.1  | 17.67 | 19.66  |
| 23972  | 'Papss2'  | 3.84  | 1.07  | 2.49 | 0    | 0.11 | 4.13  | 0.8  | 3.09  | 1.47  | 0      |
| 239731 | 'Rimbp3'  | 1.36  | 1.78  | 0    | 0    | 0.01 | 0     | 0    | 0     | 0.8   | 0      |
| 239739 | 'Lamp3'   | 0     | 0.04  | 0    | 0    | 0    | 0     | 0    | 0     | 0.03  | 0.04   |
| 239743 | 'Klhl6'   | 0     | 0     | 0.02 | 0    | 2.65 | 0.68  | 0    | 0     | 0     | 0      |
| 239759 | 'Liph'    | 1.53  | 0     | 0    | 0    | 0    | 0     | 0    | 0     | 0     | 1.48   |
| 239766 | 'Rtp1'    | 1.56  | 3.95  | 0    | 0    | 0.03 | 3.67  | 3.92 | 5.64  | 0     | 0      |
| 239789 | 'Gmnc'    | 0     | 0     | 0    | 0    | 0    | 0     | 0    | 0.03  | 0     | 0      |
| 239796 | 'Mb21d2'  | 11.5  | 4.68  | 1.87 | 0    | 0.55 | 6.42  | 3.6  | 5.56  | 5.12  | 2.89   |
| 23980  | 'Pebp1'   | 739.5 | 772.6 | 774  | 641  | 812  | 1061  | 983  | 794.9 | 591   | 680.63 |
| 239827 | 'Pigz'    | 14.29 | 3.84  | 7.79 | 1.69 | 2.73 | 8.35  | 11.9 | 12.13 | 18.68 | 9.68   |
| 23983  | 'Pcbp1'   | 102   | 104.8 | 79.9 | 84.2 | 86.3 | 103.8 | 87.7 | 78.72 | 64.95 | 100.21 |
| 239833 | 'Lmln'    | 0.29  | 0.01  | 0.41 | 2.15 | 1.03 | 2.77  | 3.22 | 0.55  | 1.19  | 1.79   |
| 239839 | 'Ccdc14'  | 0.65  | 0.24  | 0    | 8.21 | 0.45 | 0     | 1.97 | 1.59  | 0     | 0.38   |
| 23984  | 'Pde10a'  | 4.12  | 2.03  | 3.44 | 5.95 | 2.86 | 3.47  | 1.48 | 1.87  | 11.42 | 2.13   |
| 239845 | 'Gpr156'  | 0     | 0     | 1.24 | 0    | 0    | 0     | 0    | 0     | 0     | 0      |
| 23985  | 'Slc26a4' | 0     | 0     | 2.73 | 0    | 0    | 0     | 0    | 0.9   | 0     | 0.01   |
| 239857 | 'Cadm2'   | 3.46  | 2.17  | 3.09 | 2.48 | 3.02 | 0.13  | 7.82 | 2.58  | 1.16  | 4.02   |
| 23986  | 'Eci2'    | 20.23 | 40.78 | 50.7 | 57.7 | 23.2 | 52.48 | 51.4 | 35.58 | 24.31 | 19.82  |
| 23988  | 'Pin1'    | 67.89 | 55.9  | 58.5 | 86.7 | 90.6 | 86.1  | 58.7 | 91.77 | 71.89 | 84.73  |
| 23989  | 'Med24'   | 15.72 | 31.8  | 27.7 | 19.3 | 13.8 | 8.32  | 37.7 | 26.46 | 11.07 | 28.98  |
| 23991  | 'Cib1'    | 7.87  | 2.07  | 5.26 | 0.07 | 10.1 | 16.7  | 5.88 | 5.77  | 13.58 | 4.64   |
| 23992  | 'Prkra'   | 13.42 | 38.12 | 36   | 24.3 | 14.6 | 30.24 | 33.8 | 23.1  | 20.78 | 27.35  |
| 23994  | 'Dazap2'  | 71.96 | 52.56 | 81.4 | 126  | 66.3 | 82.62 | 120  | 78    | 53.05 | 58.97  |
| 23996  | 'Psmc4'   | 156.2 | 187.6 | 182  | 208  | 163  | 223.6 | 142  | 241.6 | 233.2 | 192.39 |
| 23997  | 'Psm13'   | 112.5 | 114.7 | 130  | 152  | 120  | 103.6 | 112  | 134.6 | 87.21 | 119.44 |
| 239985 | 'Arid1b'  | 2.35  | 1.65  | 0.39 | 1.93 | 0.46 | 0.43  | 0.56 | 0.32  | 2.47  | 1.33   |
| 23999  | 'Twf2'    | 12.99 | 33.61 | 40   | 12.3 | 34.4 | 22.65 | 20.3 | 22.92 | 24.81 | 39.17  |
| 24000  | 'Ptpn21'  | 0.46  | 0.11  | 0.18 | 1.13 | 0    | 0.9   | 1.71 | 0.42  | 1.19  | 0.24   |
| 24001  | 'Tiam2'   | 1.45  | 1.28  | 1.68 | 3.29 | 0.11 | 0     | 0.06 | 1.88  | 0     | 1.71   |
| 240023 | 'Pnldc1'  | 0.03  | 0.21  | 0    | 0.13 | 0.09 | 0.11  | 0.68 | 0.03  | 0.09  | 0      |
| 240025 | 'Dact2'   | 9.44  | 4.58  | 1.68 | 0.02 | 2.01 | 0     | 1.8  | 1.98  | 7.02  | 0.03   |
| 240028 | 'Lnpep'   | 0.02  | 1.62  | 1.61 | 0    | 0    | 4.53  | 1.11 | 1.4   | 3.22  | 0.69   |
| 240034 | 'Zfp760'  | 1.99  | 1.9   | 0.66 | 0.01 | 3.21 | 0.01  | 0    | 0.71  | 2.16  | 0.01   |
| 240038 | 'Zfp994'  | 2.46  | 3.81  | 3.85 | 2.48 | 1.08 | 2.06  | 5.99 | 3.24  | 1.46  | 1.73   |
| 24004  | 'Rai2'    | 1.39  | 0.84  | 2.63 | 11   | 8.02 | 2.72  | 12.7 | 5.42  | 13.22 | 9.66   |

|        |                 |       |       |      |      |      |       |      |       |       |        |
|--------|-----------------|-------|-------|------|------|------|-------|------|-------|-------|--------|
| 240041 | 'Zfp945'        | 1.69  | 0.77  | 2.39 | 3.03 | 2.06 | 1.28  | 1.5  | 1.36  | 2.64  | 2.28   |
| 240047 | 'Mmp25'         | 0     | 0.03  | 0    | 0.02 | 0    | 0     | 0    | 0     | 0     | 0.02   |
| 240055 | 'Neurl1b'       | 0.17  | 0     | 0.92 | 4.14 | 0.25 | 0     | 0    | 0     | 0     | 0.01   |
| 240057 | 'Syngap1'       | 0.78  | 0.3   | 1.47 | 0.76 | 0.53 | 2.97  | 0.77 | 1.4   | 1.13  | 0.67   |
| 240058 | 'Cpne5'         | 9.35  | 7.83  | 7.55 | 25.2 | 16.6 | 22.68 | 11.7 | 14.32 | 7.01  | 23.53  |
| 240063 | 'Zfp811'        | 6.8   | 11.12 | 4.57 | 0.22 | 3.3  | 5.5   | 11.6 | 13.33 | 3.33  | 8.01   |
| 240064 | 'Zfp799'        | 5.34  | 4.59  | 4.27 | 6.47 | 3.68 | 3.97  | 3.27 | 2.13  | 1.78  | 11.44  |
| 240066 | 'Zfp870'        | 0.14  | 0.06  | 3.8  | 0    | 0    | 1.58  | 0.01 | 1.57  | 4.38  | 3.22   |
| 240067 | 'Zfp952'        | 12.25 | 4.13  | 7.33 | 18.8 | 14.9 | 3.42  | 7.5  | 10.47 | 10.29 | 2.51   |
| 240068 | 'Zfp563'        | 4.77  | 1.84  | 0.85 | 0    | 1.38 | 1.18  | 3.06 | 1.37  | 4.48  | 2.48   |
| 240069 | 'Morc2b'        | 1.58  | 0.6   | 2.39 | 0    | 0.02 | 0.93  | 2.46 | 0.34  | 0     | 0.45   |
| 240084 | 'Cchcr1'        | 1.63  | 0     | 0.25 | 0    | 0    | 0     | 0    | 0     | 0     | 1.34   |
| 240087 | 'Mdc1'          | 0.29  | 0.61  | 1.23 | 0.58 | 2.58 | 1.48  | 0.97 | 0.2   | 0.79  | 4.21   |
| 240095 | 'H2-M5'         | 1.32  | 0     | 0    | 2.35 | 0    | 0     | 0.09 | 0.21  | 0     | 0      |
| 24010  | 'Ik'            | 97.61 | 69.62 | 96.8 | 143  | 68.2 | 50.03 | 78.6 | 80.7  | 66.52 | 82.44  |
| 240119 | 'St6gal2'       | 1.66  | 0.4   | 12.7 | 0    | 0.29 | 12.07 | 1.36 | 10.04 | 0.02  | 0      |
| 24012  | 'Rgs7'          | 17.72 | 5.65  | 14.9 | 10.1 | 8.07 | 7.36  | 11.3 | 9.98  | 15.47 | 12.2   |
| 240120 | 'Zfp119b'       | 2.43  | 0     | 5.83 | 0.13 | 0    | 0     | 0.03 | 0.02  | 3.34  | 0.09   |
| 240121 | 'Fsd1'          | 116.7 | 134.7 | 97.3 | 119  | 117  | 82.29 | 99.5 | 91.29 | 107.2 | 115.91 |
| 24013  | 'Grk1'          | 2.42  | 2.46  | 3.76 | 2.69 | 4.13 | 2.91  | 3.23 | 2.46  | 4.79  | 2.27   |
| 24014  | 'Rnasel'        | 0.13  | 0.1   | 0.11 | 0.21 | 6.01 | 0.07  | 2.98 | 0.09  | 5.82  | 6.8    |
| 24015  | 'Abce1'         | 17.98 | 14.49 | 14.5 | 26   | 11.6 | 7.69  | 9.11 | 15.93 | 19.25 | 10.87  |
| 240168 | 'Rasgrp3'       | 3.9   | 0.54  | 0    | 0.01 | 1.91 | 2.44  | 0    | 0     | 0     | 2.11   |
| 24017  | 'Rnf13'         | 83.23 | 57.98 | 92.3 | 62.2 | 60.3 | 76.03 | 50.1 | 38.52 | 56.6  | 64.34  |
| 240174 | 'Thada'         | 3.63  | 0.86  | 2.21 | 0.02 | 2.32 | 0.46  | 5.09 | 0.38  | 0.25  | 2.42   |
| 24018  | 'Rngtt'         | 19.57 | 18.39 | 5.01 | 21.7 | 8.72 | 5.28  | 14   | 11.71 | 18.12 | 29.15  |
| 240185 | 'Jcad'          | 0.2   | 0     | 0    | 0    | 0.77 | 0     | 0    | 0.01  | 0     | 3.18   |
| 240186 | 'Zfp438'        | 1.32  | 0.95  | 0    | 0.08 | 0.11 | 5.97  | 1.88 | 2.12  | 7.5   | 0      |
| 240216 | 'E230025N22Rik' | 0     | 0     | 0.32 | 0    | 0.03 | 11.18 | 3.73 | 0     | 0     | 0      |
| 240239 | 'Gpr151'        | 0     | 9.47  | 0    | 0    | 0.03 | 0.03  | 0    | 0     | 0     | 0      |
| 240255 | 'Ythdc2'        | 0.27  | 0.46  | 1.01 | 1.91 | 0.84 | 0.01  | 5.22 | 0.85  | 0.75  | 0.12   |
| 240261 | 'Ccdc112'       | 0.28  | 1.31  | 2.11 | 2.14 | 1.77 | 0.98  | 3.05 | 1.82  | 1.1   | 1.21   |
| 240263 | 'Fem1c'         | 4.8   | 2.28  | 1.9  | 6.89 | 9.87 | 2.29  | 3.95 | 4.2   | 1.94  | 2.95   |
| 240283 | 'Dmxl1'         | 0.72  | 0.51  | 0.65 | 2.27 | 0.63 | 0.58  | 1.52 | 0.06  | 1.06  | 0.51   |
| 24030  | 'Mrps12'        | 230   | 161.8 | 202  | 243  | 245  | 347.7 | 252  | 307.1 | 231.3 | 272.84 |
| 240322 | 'Adamts19'      | 0     | 0     | 0    | 0.16 | 0    | 0     | 0    | 0     | 0     | 0.01   |
| 240327 | 'Gm4951'        | 0.02  | 0.02  | 1.18 | 0    | 0    | 0.04  | 0    | 0     | 1.22  | 0.21   |
| 240328 | 'F830016B08Rik' | 4.69  | 3.61  | 5.22 | 11.5 | 7.37 | 5.43  | 4.15 | 2.21  | 4.38  | 4.37   |
| 240332 | 'Slc6a7'        | 10.41 | 7.43  | 10.9 | 7.17 | 9.32 | 7.83  | 10.4 | 4.87  | 3.47  | 2.06   |
| 240334 | 'Pcyox1l'       | 23.87 | 34.38 | 21.4 | 13.7 | 26   | 25.75 | 28   | 40.7  | 42.92 | 35.28  |
| 240354 | 'Malt1'         | 0.99  | 0.35  | 1.47 | 2.53 | 0.82 | 0.18  | 2.99 | 0.19  | 1.19  | 0.65   |
| 240396 | 'Mex3c'         | 1.23  | 0.88  | 0.33 | 0.01 | 0.67 | 0     | 1.44 | 1.26  | 0     | 0.03   |
| 240427 | 'Setbp1'        | 0.49  | 1.46  | 0.41 | 0.76 | 0    | 0.54  | 0.07 | 0.07  | 0.82  | 0.8    |
| 24044  | 'Scamp2'        | 5.7   | 16.59 | 17.3 | 5.77 | 1.68 | 20.13 | 20.6 | 5.08  | 3.67  | 4.77   |
| 240442 | 'Adnp2'         | 6.24  | 0.29  | 1.68 | 9.64 | 0.8  | 0.04  | 3.2  | 3.97  | 1.86  | 2.45   |
| 240444 | 'Kcng2'         | 0.35  | 2.65  | 0.04 | 3.74 | 4.93 | 4.44  | 1.78 | 2.8   | 2.36  | 4.71   |
| 24045  | 'Scamp3'        | 83.62 | 73.69 | 73.7 | 85.5 | 86.8 | 83.9  | 79.7 | 91.07 | 95.74 | 61.37  |
| 24046  | 'Scn11a'        | 1.41  | 0     | 0.01 | 1.1  | 2.78 | 0.57  | 0    | 0     | 0     | 1.08   |
| 24047  | 'Ccl19'         | 0     | 0     | 0    | 0    | 0    | 0     | 0    | 0     | 0.52  | 0      |
| 240476 | 'Zfp407'        | 1.46  | 0.56  | 1.12 | 3.73 | 2.24 | 1.2   | 0    | 0.43  | 0.09  | 1.05   |
| 240479 | 'Fam69c'        | 0     | 0     | 5.16 | 2.61 | 0    | 3     | 0    | 3.06  | 0     | 0      |
| 24050  | 'Sept3'         | 50.97 | 41.86 | 54.7 | 52.3 | 50.4 | 50.33 | 32.9 | 54.03 | 29.99 | 40.22  |
| 240505 | 'Cdc42bpg'      | 0.62  | 0     | 0    | 0    | 0    | 0     | 0    | 1.05  | 0     | 0      |
| 24051  | 'Sgcb'          | 17.16 | 33.08 | 29.2 | 15.5 | 8.79 | 25.45 | 51.2 | 33.61 | 20.36 | 36.79  |
| 240514 | 'Ccdc85b'       | 7.41  | 8.43  | 14.8 | 5.67 | 16.9 | 5.28  | 10.2 | 4.97  | 9.84  | 0.93   |
| 240518 | 'Peli3'         | 21    | 8.97  | 14.8 | 8.77 | 19.3 | 3.57  | 24.8 | 6.94  | 33.07 | 20.37  |
| 24052  | 'Sgcd'          | 2.84  | 0.05  | 0.84 | 0.11 | 1.18 | 0.1   | 1.62 | 0.47  | 0.75  | 4.79   |
| 24053  | 'Sgcg'          | 0     | 0.01  | 0.09 | 0    | 0.04 | 0.03  | 0    | 0.01  | 0.02  | 0.02   |

|        |                 |       |       |      |      |      |       |      |       |       |        |
|--------|-----------------|-------|-------|------|------|------|-------|------|-------|-------|--------|
| 240549 | 'Gm4952'        | 4.01  | 0     | 0.03 | 0    | 0    | 0     | 0    | 0     | 0.03  | 0      |
| 24055  | 'Sh3bp2'        | 0     | 0.13  | 0    | 0    | 4.43 | 3.57  | 1.79 | 0     | 0.31  | 0.74   |
| 24056  | 'Sh3bp5'        | 25.3  | 28.24 | 15.5 | 6.82 | 22.7 | 19.71 | 34.6 | 18.97 | 12.91 | 13.25  |
| 24057  | 'Sh3yl1'        | 0     | 12.51 | 18.4 | 22.7 | 13.5 | 7.45  | 12.5 | 8.04  | 18.17 | 10.54  |
| 24059  | 'Slco2a1'       | 0     | 0.04  | 0    | 0    | 0.09 | 0     | 0    | 0     | 0     | 0      |
| 24060  | 'Slc35a1'       | 9.15  | 20.99 | 20.1 | 35.1 | 22.9 | 30.39 | 12.1 | 22.65 | 18.46 | 24.01  |
| 24061  | 'Smc1a'         | 20.84 | 31.86 | 30.3 | 29.8 | 19.4 | 23.39 | 25.8 | 24.38 | 23.04 | 23.15  |
| 240613 | '9930021J03Rik' | 3.18  | 0.34  | 3.48 | 8.2  | 2.02 | 2.57  | 2.6  | 0.6   | 5.63  | 0.99   |
| 240614 | 'Ranbp6'        | 18.68 | 13.18 | 9.59 | 9.37 | 14.1 | 5.8   | 27.6 | 8.27  | 16.28 | 13.71  |
| 24063  | 'Spry1'         | 4.49  | 8.43  | 19   | 21.2 | 1.18 | 0     | 4.1  | 2.6   | 0     | 2.03   |
| 240638 | 'Slc16a12'      | 0.04  | 0     | 0    | 0    | 0    | 0     | 3.5  | 0     | 0     | 0      |
| 24064  | 'Spry2'         | 13.76 | 20.61 | 16.6 | 51.4 | 5.29 | 12.29 | 8.68 | 15.67 | 18.19 | 18.15  |
| 240641 | 'Kif20b'        | 0     | 0     | 0.33 | 0    | 0    | 0.15  | 0    | 0     | 0     | 0      |
| 24066  | 'Spry4'         | 0.79  | 2.31  | 1.95 | 0.6  | 1.15 | 0.22  | 7.93 | 2.76  | 0.43  | 2.53   |
| 240660 | 'Slc35g1'       | 2.76  | 0.07  | 0.12 | 0.08 | 0.11 | 0.03  | 0.03 | 0.03  | 0.11  | 1.39   |
| 240665 | 'Ccnj'          | 1.28  | 1.05  | 1.63 | 3.05 | 0.05 | 0     | 0    | 0.34  | 0.94  | 0      |
| 240667 | 'Sec31b'        | 0     | 0     | 0.08 | 0    | 0    | 0     | 0.49 | 0.34  | 1.28  | 0.19   |
| 24067  | 'Srp54a'        | 30.53 | 29.55 | 40.9 | 31.2 | 28   | 33.7  | 25.9 | 38.97 | 41.38 | 34.02  |
| 240672 | 'Dusp5'         | 0     | 0.38  | 3.63 | 7.06 | 0    | 0     | 0.04 | 0     | 0.42  | 0.19   |
| 240675 | 'Vwa2'          | 0     | 0.19  | 0    | 4.41 | 1.26 | 0     | 0    | 0     | 0.01  | 0      |
| 24068  | 'Sra1'          | 87.73 | 57.98 | 68.7 | 125  | 105  | 97.6  | 20.5 | 59.94 | 77.04 | 109.39 |
| 24069  | 'Sufu'          | 2.61  | 4.04  | 2.5  | 7.55 | 3.44 | 2.34  | 2.72 | 2.09  | 0.3   | 1.78   |
| 240690 | 'St18'          | 0.06  | 0.12  | 0.01 | 0.01 | 0.84 | 1.3   | 0.71 | 0     | 0.01  | 0.57   |
| 240697 | 'Mcmdc2'        | 8.71  | 5.79  | 7.38 | 11   | 9.59 | 7.94  | 7.13 | 7.08  | 11.36 | 7.44   |
| 24070  | 'Mpdu1'         | 34.98 | 43.51 | 62   | 62.3 | 51.8 | 51.75 | 44.7 | 65.74 | 46.54 | 45.47  |
| 24071  | 'Synj2bp'       | 15.22 | 17.14 | 14.3 | 14.8 | 16.7 | 11.99 | 14.5 | 15.45 | 9.27  | 13.41  |
| 240725 | 'Sulf1'         | 11.59 | 4.2   | 12.9 | 5.86 | 9.07 | 1.17  | 18.5 | 3.19  | 24.2  | 22.48  |
| 240726 | 'Slco5a1'       | 0     | 0.29  | 0.01 | 1.24 | 0.76 | 0     | 0.88 | 0.28  | 0.01  | 0.02   |
| 24074  | 'Taf7'          | 12.38 | 11.8  | 15.1 | 33.7 | 4.19 | 7.26  | 13.1 | 6.69  | 12.38 | 13.45  |
| 24075  | 'Taf10'         | 8     | 4.43  | 24.9 | 9.79 | 7.15 | 4.45  | 6.51 | 0.06  | 5.93  | 1.26   |
| 240752 | 'Pik3c2b'       | 0.77  | 1.9   | 0.36 | 2.91 | 1.9  | 0.33  | 0.1  | 0.54  | 0.68  | 1.72   |
| 240753 | 'Plekha6'       | 4.33  | 4.32  | 5.31 | 1.29 | 3.76 | 3.9   | 5.79 | 3.9   | 3.96  | 4.5    |
| 240754 | 'Lax1'          | 1.29  | 0     | 0    | 0    | 0    | 0     | 0    | 0     | 0     | 0      |
| 240756 | 'Klhl12'        | 31.03 | 15.28 | 23.7 | 12.8 | 5.02 | 12.98 | 24   | 24.44 | 8.65  | 18.19  |
| 240776 | 'Kcnt2'         | 0.03  | 0     | 2.19 | 1.47 | 3.47 | 2.24  | 0.28 | 2.11  | 5.01  | 7.02   |
| 240816 | 'Rgs11'         | 0     | 0     | 0.07 | 0    | 0    | 0     | 0    | 0     | 0     | 0      |
| 24083  | 'Natd1'         | 1.38  | 2.35  | 3.53 | 3.31 | 0.28 | 5.87  | 0    | 0.01  | 0     | 0.66   |
| 240832 | 'Tor1aip2'      | 34.12 | 19.08 | 30.2 | 57.1 | 15.2 | 18.05 | 22.6 | 28.69 | 10.52 | 32.39  |
| 24084  | 'Tekt2'         | 7.72  | 36.28 | 6.79 | 13.1 | 51.9 | 25.96 | 9.84 | 6.19  | 16.9  | 40.59  |
| 240843 | 'Brinp2'        | 35.89 | 33.95 | 27.9 | 42.2 | 6.09 | 4.6   | 14.5 | 35.54 | 25.55 | 31.49  |
| 24086  | 'Tlk2'          | 1.63  | 4.25  | 6.63 | 7.9  | 12.4 | 4.32  | 8.82 | 4.42  | 11.55 | 4.47   |
| 240869 | 'Zbtb37'        | 0.58  | 0.84  | 3.73 | 0    | 1.57 | 4.04  | 2.76 | 1.47  | 0     | 0.32   |
| 24087  | 'Tll2'          | 0.01  | 0.49  | 0    | 2.54 | 0.99 | 0.63  | 0    | 0     | 0.67  | 0      |
| 240879 | 'Mettl11b'      | 0     | 0     | 0    | 0    | 0    | 0     | 1.08 | 0     | 0     | 0      |
| 24088  | 'Tlr2'          | 0     | 0     | 0    | 0    | 0    | 2.98  | 0    | 0     | 0     | 1.92   |
| 240880 | 'Scyl3'         | 3.14  | 1.44  | 5.13 | 3.59 | 0.42 | 0.79  | 5.95 | 2     | 1.84  | 0.02   |
| 240888 | 'Gpr161'        | 0.24  | 0.67  | 0.01 | 0.02 | 0    | 0.01  | 0    | 0.47  | 1.45  | 0.08   |
| 240892 | 'Dusp27'        | 0     | 0     | 0    | 0.01 | 0    | 0     | 0    | 0     | 0     | 0      |
| 240913 | 'Adamts4'       | 1.41  | 5.68  | 0.12 | 0.02 | 1.23 | 0.27  | 3.23 | 0     | 0.01  | 0      |
| 240916 | 'Vsig8'         | 0.37  | 0     | 1.8  | 0    | 0    | 0     | 0    | 0.03  | 0.07  | 1.24   |
| 240960 | 'Dnah14'        | 0.01  | 0     | 0    | 0    | 0    | 0     | 0    | 0     | 0     | 0      |
| 24099  | 'Tnfsf13b'      | 1.83  | 0     | 1.48 | 0    | 2.31 | 3.71  | 0.07 | 3.07  | 2.31  | 0      |
| 24100  | 'Tpra1'         | 67.48 | 76.38 | 47   | 29.5 | 68.5 | 40.34 | 71.6 | 68.2  | 68.69 | 99.56  |
| 24102  | 'Trex2'         | 0     | 3.33  | 0    | 0    | 0    | 0     | 0    | 0     | 0     | 0      |
| 24105  | 'Rbck1'         | 62.34 | 63.74 | 84.8 | 51.8 | 53.2 | 79.1  | 126  | 87.12 | 40.29 | 110.45 |
| 241062 | 'Pgap1'         | 2.63  | 3.12  | 4.77 | 3.68 | 1.66 | 1.64  | 4.54 | 1.9   | 0.82  | 4.66   |
| 241066 | 'Carf'          | 5.21  | 2.87  | 3.85 | 2.28 | 2.61 | 1.27  | 0.14 | 1.98  | 4.28  | 1.61   |
| 241070 | 'Gpr1'          | 2.58  | 8.97  | 6.01 | 10.1 | 1.64 | 9.54  | 0.03 | 0.02  | 0.77  | 0.14   |

|        |                 |       |       |      |      |      |       |      |       |       |       |
|--------|-----------------|-------|-------|------|------|------|-------|------|-------|-------|-------|
| 241075 | 'Plek3m3'       | 0.48  | 1.66  | 0.37 | 1.12 | 0.88 | 0.83  | 3.97 | 1.87  | 2.05  | 1.92  |
| 24109  | 'Ubl3'          | 60.36 | 48.29 | 67.5 | 67   | 57.3 | 90.63 | 57.4 | 97.49 | 76.74 | 55.18 |
| 24110  | 'Usp18'         | 0     | 2.67  | 2.81 | 31.6 | 2.88 | 0     | 6.6  | 0     | 0     | 0.02  |
| 241112 | 'Catip'         | 0     | 2.77  | 0    | 0    | 0    | 0     | 0    | 0.72  | 0     | 0     |
| 241113 | 'Prkag3'        | 0     | 0     | 0    | 0    | 0    | 0.02  | 0    | 0     | 0     | 0     |
| 241116 | 'Cfap65'        | 0.4   | 3.14  | 0.01 | 0.01 | 0.75 | 0.02  | 0    | 1.71  | 3.05  | 0.81  |
| 241118 | 'Asic4'         | 0.02  | 36.64 | 2.15 | 0    | 0    | 0.02  | 0.51 | 0     | 0.03  | 0     |
| 241134 | 'Nyap2'         | 3.01  | 4.65  | 2.84 | 1.96 | 1.38 | 0.64  | 1.99 | 4.83  | 1.52  | 2.68  |
| 24115  | 'Best1'         | 12.21 | 3.76  | 5.89 | 5.34 | 12.9 | 18.46 | 6.16 | 2.68  | 27.81 | 10.93 |
| 241158 | 'Ankmy1'        | 0     | 0     | 0.18 | 0    | 0    | 2.78  | 0.09 | 0     | 0.07  | 2.34  |
| 241159 | 'Neu4'          | 0     | 0     | 7.42 | 2.89 | 1.18 | 0     | 25.4 | 3.97  | 0     | 0     |
| 24116  | 'Nelfa'         | 25.73 | 26.86 | 17.3 | 7.35 | 19.9 | 19.72 | 20.5 | 21.33 | 26.57 | 10.47 |
| 24117  | 'Wif1'          | 0     | 3.42  | 0    | 0    | 0.02 | 1.32  | 0    | 3.19  | 7.25  | 0     |
| 241175 | 'Cntnap5b'      | 1.5   | 0.04  | 0.02 | 0    | 1.3  | 1.12  | 1.49 | 2.47  | 0.23  | 1.76  |
| 241201 | 'Cdh7'          | 2.66  | 6.34  | 4.92 | 0.02 | 1.25 | 0.55  | 0.38 | 7.05  | 2.95  | 4     |
| 241226 | 'Itga8'         | 0     | 1.21  | 0.55 | 0    | 0    | 0.01  | 0.53 | 0     | 1.19  | 0.89  |
| 241230 | 'St8sia6'       | 0     | 0     | 1.54 | 0.01 | 0.26 | 0     | 0    | 4.1   | 0.4   | 0.01  |
| 241263 | 'Gpr158'        | 1.98  | 3.92  | 10.4 | 3.45 | 9.32 | 2.22  | 7.26 | 2.82  | 5.51  | 4.57  |
| 24127  | 'Xrn1'          | 2.94  | 1.16  | 2.56 | 10.3 | 2.15 | 5.41  | 3.58 | 2.65  | 3.54  | 1.62  |
| 241274 | 'Pnpla7'        | 0.43  | 2.53  | 0.07 | 5.39 | 0.59 | 3.06  | 3.93 | 0.23  | 0     | 1.25  |
| 24128  | 'Xrn2'          | 15.79 | 11    | 22.8 | 27.8 | 12.7 | 13.23 | 9.94 | 15.97 | 17.14 | 18.06 |
| 241289 | 'Ppp1r26'       | 3.46  | 2.89  | 3.84 | 4.48 | 1.89 | 0.05  | 1.11 | 1.49  | 2.29  | 0.96  |
| 241296 | 'Lrrc8a'        | 32.48 | 23.8  | 30.5 | 28.8 | 41.7 | 35.01 | 30.2 | 56.07 | 76.97 | 37.03 |
| 241303 | 'Fam78a'        | 0     | 0.02  | 0    | 0.01 | 0    | 0     | 0    | 0     | 0     | 0     |
| 241308 | 'Ralgps1'       | 2.02  | 3.3   | 3.52 | 10.7 | 2.08 | 1.95  | 8.53 | 2.1   | 2.24  | 4.48  |
| 24131  | 'Ldb3'          | 6.7   | 4.69  | 0.95 | 0.21 | 11.9 | 0.23  | 0.19 | 5.57  | 0.16  | 5.35  |
| 241311 | 'Zbtb34'        | 1.19  | 0     | 0    | 0    | 0    | 0     | 0    | 0.73  | 0     | 0.25  |
| 24132  | 'Zfp53'         | 10.95 | 6.59  | 5.4  | 0.84 | 5.48 | 3.34  | 4.86 | 4.41  | 2.16  | 10.03 |
| 241322 | 'Zbtb6'         | 1.86  | 0.25  | 0.47 | 3.7  | 0.07 | 0.23  | 0.26 | 0.75  | 0.02  | 1.19  |
| 241324 | 'Crb2'          | 0     | 0     | 0.01 | 0    | 0    | 0     | 0    | 0     | 0.03  | 0.89  |
| 241327 | 'Olfml2a'       | 0     | 0     | 0    | 0    | 0    | 0     | 0    | 0     | 2.94  | 0     |
| 24135  | 'Zfp68'         | 6.64  | 7.06  | 12.7 | 5.68 | 5.9  | 7.72  | 10.9 | 14.82 | 9.52  | 13.44 |
| 24136  | 'Zeb2'          | 0.64  | 0.01  | 0.02 | 0    | 0.77 | 1.89  | 3.55 | 0.14  | 1.88  | 0.24  |
| 241431 | 'Xirp2'         | 0.01  | 0     | 0.04 | 0    | 0    | 0.01  | 0.02 | 0     | 0.01  | 0.01  |
| 241447 | 'Cers6'         | 3.32  | 3.43  | 2.82 | 3.69 | 3.43 | 0.02  | 2.77 | 3.13  | 2.44  | 4.09  |
| 241489 | 'Pde11a'        | 0     | 0.36  | 4.36 | 0.01 | 3.96 | 0.27  | 0.3  | 1.29  | 0.01  | 0.93  |
| 241490 | 'Rbm45'         | 2.7   | 2.29  | 0.99 | 1.02 | 3.67 | 0.31  | 0.98 | 1.67  | 1.88  | 0.59  |
| 241494 | 'Zfp385b'       | 1.24  | 9.73  | 8.63 | 9.07 | 16.3 | 1.82  | 10.3 | 16.52 | 1.67  | 12.73 |
| 241514 | 'Zfp804a'       | 1.9   | 3.74  | 0.68 | 3.95 | 3.55 | 1.55  | 2.28 | 1.21  | 1.49  | 1.07  |
| 241516 | 'Fsip2'         | 0     | 0     | 0    | 0    | 0    | 0     | 0    | 0.01  | 0     | 0     |
| 241520 | 'Fam171b'       | 54.99 | 96.78 | 57.9 | 41   | 29.9 | 39.32 | 60.5 | 55.29 | 58.98 | 51.66 |
| 241525 | 'Ypel4'         | 32.96 | 25.96 | 45.6 | 6.19 | 26.6 | 19.89 | 32.9 | 26.88 | 50.15 | 58.71 |
| 241528 | 'Lrrc55'        | 10.61 | 1.19  | 8.82 | 3.38 | 4.39 | 0.15  | 2.34 | 4.2   | 5.04  | 3.58  |
| 241547 | 'Harbi1'        | 4.95  | 11.06 | 6.17 | 0    | 3.35 | 0.77  | 1.04 | 6.81  | 6.11  | 5.37  |
| 241556 | 'Tspan18'       | 5.1   | 3.18  | 7.38 | 0    | 3.62 | 0.41  | 0.22 | 5.76  | 0     | 7.2   |
| 241568 | 'Lrrc4c'        | 23.8  | 21.35 | 31.9 | 23.2 | 37.4 | 32.51 | 27.1 | 32.94 | 44.94 | 24.03 |
| 241576 | 'Ldlrad3'       | 0     | 0.29  | 1.59 | 0.06 | 0    | 0.13  | 3.02 | 1.47  | 0.33  | 0.08  |
| 241589 | 'D430041D05Rik' | 2.13  | 0.99  | 2.19 | 2.64 | 1.73 | 3.06  | 2.34 | 3.33  | 2.38  | 2.31  |
| 241612 | 'Slc5a12'       | 0.02  | 0     | 0    | 0    | 0    | 0     | 0    | 0     | 0     | 0     |
| 241624 | 'Exd1'          | 0.01  | 0.27  | 1.02 | 0    | 1.33 | 0.06  | 0.02 | 0.02  | 0.01  | 0     |
| 241627 | 'Wdr76'         | 0.94  | 0.15  | 0.45 | 0    | 1.01 | 0.12  | 1.25 | 0.1   | 0     | 0.09  |
| 241633 | 'Atp8b4'        | 0     | 0.89  | 0    | 0    | 0    | 0     | 0    | 0     | 0     | 0     |
| 241636 | 'Tgm6'          | 0     | 0     | 0.45 | 0    | 0.02 | 0     | 0    | 0     | 0     | 0     |
| 241638 | 'Lzts3'         | 1.63  | 1.78  | 10   | 2.14 | 2.64 | 1.94  | 5.17 | 3.12  | 9.1   | 3.66  |
| 241639 | 'Fermt1'        | 0     | 0     | 0    | 0    | 0    | 0.29  | 0    | 1.18  | 0     | 0     |
| 241656 | 'Pak7'          | 8.92  | 9.74  | 3.91 | 15.7 | 2.56 | 0.04  | 3.08 | 4     | 4.38  | 5.11  |
| 241688 | 'Dzank1'        | 18.02 | 11.41 | 40.1 | 16.7 | 12.1 | 14.22 | 27.8 | 16.62 | 16.07 | 18.08 |
| 241694 | 'Ralgapa2'      | 1.95  | 1.73  | 2.56 | 5.99 | 0.73 | 3.4   | 0.04 | 0.78  | 2.43  | 0.78  |

|        |               |       |       |      |      |      |       |      |       |       |       |
|--------|---------------|-------|-------|------|------|------|-------|------|-------|-------|-------|
| 241727 | 'Snph'        | 9.05  | 13.78 | 30.9 | 3.69 | 3.61 | 10.46 | 12.7 | 16.5  | 3.29  | 11.45 |
| 241732 | 'Tspyl3'      | 40.85 | 37.99 | 37.2 | 7.72 | 24   | 37.98 | 21.5 | 57.44 | 42.22 | 28.28 |
| 241764 | 'L3mbtl1'     | 0.32  | 2.26  | 9.2  | 0.71 | 1.24 | 2.28  | 2.32 | 4.44  | 0.45  | 3.4   |
| 241770 | 'Rims4'       | 1.02  | 2.16  | 1.4  | 0.01 | 3.04 | 2.75  | 5.12 | 0.61  | 1.82  | 1.98  |
| 241794 | 'Kcng1'       | 0     | 0     | 6.85 | 0    | 0    | 0     | 0    | 0     | 0     | 0.83  |
| 241846 | 'Lsm14b'      | 4.6   | 3.73  | 3.8  | 3.55 | 6.03 | 1.14  | 2.18 | 0.96  | 7.22  | 2.28  |
| 241850 | 'Abhd16b'     | 0.02  | 0     | 0    | 0.06 | 0    | 0     | 0    | 0     | 0     | 0     |
| 241915 | 'Phc3'        | 1.3   | 1.65  | 4.85 | 8.18 | 1.85 | 4.41  | 4.95 | 0.95  | 2.31  | 1.19  |
| 241919 | 'Slc7a14'     | 11.97 | 8.55  | 12   | 13.6 | 7.31 | 7.35  | 6.81 | 9.99  | 17.08 | 9.43  |
| 241943 | 'Ccdc144b'    | 0     | 0.25  | 0    | 0    | 0.06 | 0.05  | 0    | 0.08  | 0     | 0.05  |
| 241944 | 'D3Erttd254e' | 2.76  | 3.74  | 3.69 | 6.77 | 8.08 | 1.15  | 1.89 | 3.4   | 1.42  | 6.95  |
| 241950 | 'Bbs12'       | 2.11  | 0.92  | 3.41 | 0    | 3.01 | 0     | 0.78 | 0.31  | 3.95  | 6.27  |
| 241989 | 'Pabpc4l'     | 0     | 0     | 0    | 0    | 0    | 0     | 0    | 0.44  | 0     | 0     |
| 242022 | 'Frem2'       | 0.41  | 0     | 0    | 0    | 0    | 0     | 0    | 0     | 0     | 0     |
| 242037 | 'Ankub1'      | 1.99  | 0     | 0    | 0    | 0    | 0.39  | 0    | 0     | 0     | 0     |
| 242050 | 'Igsf10'      | 0.01  | 0.55  | 0.52 | 0    | 1.77 | 0.08  | 0.01 | 0.17  | 1.62  | 0.01  |
| 242083 | 'Ppm1l'       | 16.02 | 7.89  | 11.6 | 18.9 | 16.2 | 6.19  | 31.6 | 13.32 | 11.88 | 7.93  |
| 242109 | 'Zfp697'      | 1.61  | 2.51  | 1.94 | 1.31 | 1.74 | 2.53  | 0.54 | 0.25  | 0.3   | 0.37  |
| 242125 | 'Mab2113'     | 0     | 0     | 0    | 0    | 0    | 0     | 0    | 0     | 0.85  | 0     |
| 242126 | 'Slc22a15'    | 0.46  | 0.22  | 0.01 | 0    | 0    | 0.04  | 0.01 | 0     | 0.21  | 0.52  |
| 242253 | 'Wdr63'       | 0     | 0     | 0    | 0    | 0.2  | 0     | 0    | 0     | 0     | 0     |
| 242259 | 'Slc44a5'     | 0.99  | 1.15  | 1.66 | 1.99 | 2.04 | 0     | 0.77 | 0.91  | 0.38  | 0     |
| 242274 | 'Lrrc7'       | 3.66  | 0.79  | 2.56 | 1.15 | 2.98 | 2.16  | 1.86 | 2.08  | 1.45  | 0.86  |
| 242291 | 'Impad1'      | 3.43  | 4.33  | 4.04 | 5.23 | 8.42 | 2.13  | 6.84 | 3.42  | 8.87  | 3.19  |
| 242297 | 'Fam110b'     | 17.2  | 17.96 | 50.3 | 10   | 2.29 | 20.65 | 26.4 | 25.75 | 32.53 | 20.27 |
| 242362 | 'Manea'       | 3.42  | 2.23  | 3.81 | 6.14 | 3.99 | 2.81  | 4.34 | 3.23  | 2.24  | 0.87  |
| 242377 | 'Pm20d2'      | 0.56  | 0.91  | 1.15 | 2.35 | 0.43 | 0.02  | 0.99 | 0.24  | 1.44  | 0.25  |
| 242384 | 'Lingo2'      | 17.09 | 4.76  | 20.8 | 11   | 4.68 | 5.66  | 22.2 | 12.65 | 12.81 | 8.69  |
| 242406 | 'Rgp1'        | 2.87  | 1.63  | 8.7  | 1.41 | 4.02 | 3.3   | 1.76 | 0.02  | 0.11  | 4.51  |
| 242408 | 'Fam221b'     | 0     | 0.6   | 0    | 0.03 | 0    | 1.72  | 0    | 0.07  | 2.03  | 1.58  |
| 242409 | 'Tmem8b'      | 4.72  | 3.53  | 4.28 | 1.68 | 4.61 | 2.82  | 4.45 | 5.84  | 12.57 | 4.79  |
| 242418 | 'Dcaf10'      | 3.11  | 2.72  | 4.14 | 18.6 | 2.73 | 2.48  | 2.02 | 1.27  | 3.34  | 1.85  |
| 242425 | 'Gabbr2'      | 5.18  | 4.9   | 2.62 | 4.79 | 9.53 | 9.69  | 3.05 | 3.13  | 0.39  | 3.15  |
| 242443 | 'Grin3a'      | 2.05  | 5.02  | 3.95 | 2.35 | 7.16 | 0.84  | 9.49 | 3.5   | 5.56  | 6.1   |
| 242466 | 'Zfp462'      | 1.41  | 1.98  | 3.71 | 3.52 | 2.68 | 0.37  | 1.12 | 4.09  | 2.01  | 1.16  |
| 242474 | 'Tmem245'     | 1.66  | 2.81  | 0.6  | 2.5  | 1.47 | 0.39  | 0.85 | 1.72  | 0.67  | 0.97  |
| 242481 | 'Palm2'       | 3.87  | 3.29  | 3.05 | 0.64 | 2.76 | 1.38  | 0.45 | 1.38  | 0.19  | 1.9   |
| 242505 | 'Rasef'       | 0     | 0     | 0    | 0    | 0    | 0.6   | 0.88 | 0.01  | 0.31  | 0.46  |
| 242506 | 'Frmtd3'      | 5.39  | 6.99  | 13.7 | 0.91 | 5.98 | 16.68 | 11.3 | 2.54  | 9.29  | 1.06  |
| 242509 | 'Bnc2'        | 0     | 0     | 0    | 2.12 | 0    | 0     | 0    | 0     | 0     | 0     |
| 242521 | 'Klhl9'       | 20.35 | 20.68 | 41.2 | 33   | 24.5 | 13.33 | 18.5 | 22.48 | 21.96 | 16.36 |
| 242523 | 'Dmrta1'      | 0     | 1.28  | 0.7  | 0    | 0    | 0     | 0    | 0     | 0     | 0     |
| 242546 | 'Cyp2j12'     | 0     | 1.02  | 0    | 0    | 5.5  | 4.74  | 0    | 0     | 0     | 0     |
| 242553 | 'Kank4'       | 0.01  | 1.22  | 0.23 | 0    | 0.85 | 0     | 4.3  | 0     | 0.32  | 0.1   |
| 242557 | 'Atg4c'       | 6.95  | 16.51 | 13.2 | 15.6 | 6.91 | 8.68  | 3.12 | 11.35 | 16.93 | 15.43 |
| 242570 | 'Raver2'      | 0.6   | 1.05  | 0    | 0    | 0    | 0.08  | 0.02 | 0     | 0     | 0.01  |
| 242584 | 'Wdr78'       | 3.76  | 5.42  | 3.94 | 0    | 7.53 | 11.15 | 8.76 | 4.9   | 7.04  | 6.05  |
| 242585 | 'Slc35d1'     | 0.02  | 2.65  | 0.62 | 5.44 | 2.5  | 3.07  | 1.06 | 0.88  | 1.19  | 0.03  |
| 242594 | 'Fyb2'        | 0.75  | 0.45  | 0    | 0    | 0    | 0     | 0.07 | 0.13  | 0     | 0.05  |
| 242602 | 'Lexm'        | 0     | 0.19  | 0    | 0    | 0    | 0     | 0    | 1.06  | 0     | 0.07  |
| 242603 | 'Cdcp2'       | 0     | 0     | 0    | 0    | 0    | 0.19  | 1.31 | 0     | 0     | 0.39  |
| 242607 | 'Slc1a7'      | 0     | 0     | 0.03 | 0.03 | 0.08 | 0     | 0    | 0     | 0     | 0     |
| 242620 | 'Dmrta2'      | 0.32  | 0     | 0    | 0    | 0    | 0.49  | 0    | 0     | 0     | 0.11  |
| 242642 | 'Hpd1'        | 1.22  | 0     | 0.61 | 0    | 0    | 0     | 0.03 | 0     | 0     | 2.04  |
| 242646 | 'Tctex1d4'    | 0     | 0     | 0    | 0    | 0    | 0     | 0    | 7.89  | 0     | 0     |
| 242653 | 'Cldn19'      | 0     | 0.01  | 0    | 0    | 0    | 0.02  | 0    | 0     | 0     | 0     |
| 242662 | 'Rims3'       | 17.54 | 8.05  | 17.9 | 11.5 | 6.8  | 7.39  | 18.6 | 10.25 | 12.79 | 9.37  |
| 242667 | 'Dlgap3'      | 2.66  | 1.2   | 4.64 | 7.09 | 5.69 | 2.45  | 5.54 | 1.32  | 1.77  | 0.72  |

|        |                 |       |       |      |      |      |       |      |       |       |         |
|--------|-----------------|-------|-------|------|------|------|-------|------|-------|-------|---------|
| 242669 | 'Azin2'         | 1.12  | 5.39  | 2.27 | 9.63 | 0.18 | 13.15 | 10.5 | 6.11  | 14.25 | 1.12    |
| 242681 | 'Rab42'         | 4.14  | 1.68  | 3.77 | 1    | 7.44 | 7.13  | 8.47 | 5.15  | 5.96  | 0.13    |
| 242687 | 'Wasf2'         | 1.71  | 3.37  | 2.67 | 2    | 4.34 | 7.73  | 0    | 1.86  | 0.69  | 4.37    |
| 242691 | 'Gpatch3'       | 1.67  | 0     | 3.73 | 0.97 | 0    | 0     | 0    | 2.99  | 0     | 0       |
| 242700 | 'Ifnlr1'        | 0     | 0     | 0.01 | 0    | 0    | 0     | 0    | 0     | 0     | 0       |
| 242702 | 'Myom3'         | 0.76  | 0     | 0    | 0    | 0    | 0     | 0    | 0     | 0     | 0       |
| 242705 | 'E2f2'          | 0     | 0     | 0    | 0    | 0    | 0.13  | 0.01 | 0     | 0     | 1.64    |
| 242707 | 'Lactbl1'       | 0     | 0     | 0    | 0    | 0    | 0     | 0    | 0     | 0     | 0.15    |
| 242721 | 'Klhdc7a'       | 0     | 0     | 0    | 0    | 0.01 | 0     | 0.14 | 0     | 0.04  | 0       |
| 242726 | 'Padi6'         | 0     | 0     | 0    | 0    | 0    | 0     | 0    | 0     | 0.79  | 0       |
| 242735 | 'Lrrc38'        | 1.3   | 5.55  | 1.78 | 4.21 | 0.99 | 1.49  | 1.66 | 4.37  | 2.02  | 0.83    |
| 242736 | 'Pramef8'       | 9.11  | 0.33  | 4.45 | 9.22 | 0.64 | 0     | 6.5  | 2.75  | 6.36  | 4.39    |
| 242747 | 'Zfp933'        | 2.38  | 1.08  | 1    | 0.04 | 2.71 | 0.02  | 0.07 | 3.06  | 1.55  | 0.02    |
| 242748 | 'Disp3'         | 10.54 | 6.89  | 14.9 | 5.28 | 3.47 | 0.96  | 7.34 | 8.7   | 6.64  | 3.59    |
| 242773 | 'Slc45a1'       | 27.78 | 23    | 33.3 | 8.84 | 20.6 | 27.13 | 25.1 | 29.47 | 49.98 | 15.38   |
| 242785 | 'Klhl21'        | 1.37  | 2.12  | 4.86 | 3.27 | 1.47 | 0.53  | 2.27 | 1.61  | 0.11  | 3.01    |
| 242800 | 'Ttc34'         | 0.04  | 1.95  | 1.75 | 0.85 | 0.14 | 0     | 1.27 | 2.22  | 0.03  | 0.61    |
| 242819 | 'Rundc3b'       | 3.6   | 3.77  | 2.77 | 4.78 | 3.04 | 3.35  | 2.61 | 5.18  | 5.84  | 5.65    |
| 242838 | 'Lrrd1'         | 0.38  | 0     | 0    | 0    | 0    | 0     | 0    | 0.63  | 1.67  | 0.04    |
| 242860 | 'Rsb1l'         | 1.03  | 0.56  | 2.07 | 4.63 | 0.92 | 0.52  | 0.19 | 0.21  | 0.09  | 0.29    |
| 242864 | 'Napepld'       | 3.27  | 0.89  | 0.01 | 1.07 | 2.78 | 0.37  | 4.16 | 2.26  | 2.03  | 2.36    |
| 242891 | 'Cct8l1'        | 0     | 0     | 0    | 0    | 0.2  | 0     | 0    | 0     | 0     | 0       |
| 242894 | 'Actr3b'        | 45.44 | 54.01 | 49.4 | 52   | 42.1 | 32.27 | 30.5 | 40.13 | 13.6  | 27.37   |
| 242915 | 'Garem2'        | 0.41  | 1.15  | 3.29 | 0    | 1.31 | 0     | 2.73 | 0     | 0.01  | 0       |
| 242960 | 'Fbx15'         | 47.84 | 45.92 | 26.6 | 60.2 | 38.2 | 29.04 | 69.9 | 30.06 | 49.13 | 61.35   |
| 243025 | 'Tmem156'       | 0     | 0     | 0    | 0    | 0    | 0     | 0    | 0.11  | 0     | 0       |
| 243043 | 'Kctd8'         | 4.58  | 6.71  | 11.2 | 3.32 | 7.74 | 2.06  | 3.8  | 4.38  | 9.08  | 0.01    |
| 243078 | 'Tecr1'         | 0.02  | 0     | 0.08 | 0    | 0    | 0     | 0    | 0     | 0     | 0.02    |
| 243168 | 'Hsd17b13'      | 0     | 0     | 0    | 0    | 0.2  | 0     | 0    | 0     | 0     | 0       |
| 243197 | 'Mfsd7a'        | 0     | 0     | 0    | 0    | 0    | 0     | 0    | 0     | 0     | 0.02    |
| 243219 | '2900026A02Rik' | 2.91  | 4.48  | 3.28 | 3.53 | 1.26 | 2.34  | 5.23 | 1.2   | 0.01  | 1.15    |
| 243272 | 'Sbno1'         | 10.35 | 9.35  | 14   | 7.15 | 10.7 | 8.12  | 9.49 | 7.75  | 13.61 | 12.18   |
| 243274 | 'Tmem132d'      | 0     | 1.44  | 0    | 6.91 | 0.43 | 0     | 0.02 | 0     | 1.76  | 0.02    |
| 243277 | 'Adgrd1'        | 0.86  | 0     | 2.7  | 0    | 0    | 0     | 0.02 | 0.16  | 0     | 0       |
| 243300 | 'Nyap1'         | 5.08  | 6.07  | 3.37 | 0.57 | 4.54 | 4.36  | 4.7  | 1.99  | 1.45  | 7.77    |
| 243308 | 'A430033K04Rik' | 9     | 3.89  | 16.4 | 4.82 | 5.68 | 7.3   | 3.31 | 7.7   | 5.86  | 8.95    |
| 243312 | 'Elf1'          | 0.81  | 7.35  | 3.24 | 3.51 | 7.66 | 1.6   | 2.19 | 0.08  | 0.01  | 1.17    |
| 243328 | 'Slc29a4'       | 4.44  | 0.5   | 12.8 | 12.1 | 0.02 | 4.12  | 5.2  | 1.75  | 3.38  | 2.4     |
| 243339 | 'Tmem130'       | 1239  | 1349  | 1242 | 939  | 705  | 1176  | 904  | 1146  | 1197  | 1408.06 |
| 243362 | 'Stard13'       | 0     | 0.08  | 1.06 | 0    | 0.06 | 0.18  | 3.58 | 0     | 0     | 1       |
| 243369 | 'Sspo'          | 0.28  | 0.21  | 0    | 0    | 0    | 0     | 0    | 0     | 0.08  | 0       |
| 243371 | 'Lrrc61'        | 25.85 | 11.96 | 27.8 | 16.1 | 19.7 | 12.11 | 13.6 | 25.13 | 17.13 | 27.08   |
| 243372 | 'Zfp775'        | 6.61  | 5.42  | 8.87 | 0    | 2.21 | 4.06  | 0    | 3.46  | 9.1   | 3.81    |
| 243374 | 'Gimap8'        | 0.5   | 0.27  | 0.99 | 0.48 | 0.4  | 0.34  | 0.05 | 0.09  | 0.17  | 0.08    |
| 243382 | 'Ppm1k'         | 12.09 | 5.89  | 10.4 | 3.58 | 9.98 | 14.64 | 9    | 7.27  | 8.21  | 8.51    |
| 243385 | 'Gprn3'         | 7.04  | 4.8   | 8.47 | 1.91 | 6.63 | 0.13  | 9.42 | 1.67  | 3.95  | 0       |
| 243407 | 'C130060K24Rik' | 2.01  | 0.84  | 0    | 0    | 0.76 | 0     | 1.44 | 0     | 0     | 0       |
| 243499 | 'Lrrtm4'        | 9.27  | 6.05  | 10.3 | 0.81 | 14   | 8.22  | 9.32 | 11.83 | 7.05  | 8.47    |
| 243510 | 'Ccdc142'       | 2.09  | 0.78  | 3.38 | 0    | 0.12 | 4.09  | 4.34 | 3.14  | 3.36  | 3.42    |
| 243529 | 'H1fx'          | 0.43  | 0.14  | 0.09 | 0.44 | 0.14 | 0.04  | 0.39 | 0.12  | 0     | 0.37    |
| 243537 | 'Uroc1'         | 0.07  | 1.57  | 0    | 0.14 | 0    | 0     | 0    | 0.09  | 0     | 0       |
| 243538 | 'Cfap100'       | 1.14  | 4.07  | 0.11 | 7.6  | 0.03 | 2.87  | 0.31 | 0.14  | 0     | 0       |
| 243547 | 'Grip2'         | 1.83  | 2.05  | 0.91 | 2.15 | 2.04 | 1.06  | 1.7  | 2.93  | 2.67  | 1.59    |
| 243548 | 'Prickle2'      | 6.15  | 4.41  | 5.64 | 8.43 | 5.2  | 5.91  | 7.16 | 5.43  | 3.83  | 3.86    |
| 243574 | 'Kbtbd8'        | 1.42  | 0     | 1.78 | 0.01 | 0    | 0.01  | 0    | 0.98  | 1.53  | 3.15    |
| 243616 | 'Slc6a11'       | 23.04 | 16.25 | 8.65 | 8.24 | 12.3 | 10.35 | 9.37 | 8.51  | 5.2   | 6.37    |
| 243621 | 'Iqsec3'        | 3.42  | 7.22  | 4.73 | 8.67 | 5.28 | 3.82  | 0.28 | 4.22  | 2.83  | 0.56    |
| 243634 | 'Ano2'          | 0     | 0     | 0    | 0    | 1.26 | 0     | 0    | 0.76  | 0     | 0       |

|        |                 |       |       |      |      |      |       |      |       |       |       |
|--------|-----------------|-------|-------|------|------|------|-------|------|-------|-------|-------|
| 243653 | 'Clec1a'        | 0     | 0     | 2.13 | 0    | 0    | 0     | 0    | 0     | 0     | 0     |
| 243659 | 'Styk1'         | 4.07  | 0     | 0    | 0    | 0    | 3.16  | 0    | 1.24  | 10.96 | 5.76  |
| 243725 | 'Ppp1r9a'       | 12.78 | 11.1  | 9.12 | 9.83 | 8.59 | 11.34 | 17   | 12.54 | 19.63 | 19.55 |
| 243743 | 'Plxna4'        | 4.76  | 2.83  | 11.1 | 9.91 | 7.43 | 0.54  | 3.1  | 4.85  | 0.91  | 3.24  |
| 243753 | 'Slc23a4'       | 0.02  | 0.14  | 4.87 | 0    | 2.61 | 0     | 0.02 | 0     | 0.57  | 0     |
| 243755 | 'Slc13a4'       | 0     | 1.32  | 0    | 0    | 2.39 | 0     | 0.01 | 0     | 0     | 0     |
| 243764 | 'Chrm2'         | 0.26  | 1.25  | 2.17 | 0.01 | 3.79 | 0     | 25.9 | 3.09  | 2.97  | 0.89  |
| 243771 | 'Parp12'        | 1.16  | 0.18  | 1.3  | 6.9  | 1.78 | 0.11  | 4.68 | 0     | 0     | 1.24  |
| 243780 | 'E330009J07Rik' | 0.9   | 0.37  | 1.75 | 0.33 | 2.19 | 0.11  | 1.37 | 0.24  | 1.63  | 0.93  |
| 243813 | 'Leng9'         | 3.39  | 11    | 4.3  | 8.84 | 11.2 | 4.69  | 26   | 12.67 | 7.24  | 6.31  |
| 243816 | 'Gp6'           | 0.04  | 0.02  | 0.41 | 0.07 | 0.06 | 0.11  | 0.02 | 0.02  | 0.03  | 0.02  |
| 243819 | 'Ppp6r1'        | 1.41  | 0.39  | 1.31 | 0.65 | 0.5  | 4.89  | 0.14 | 0.07  | 0.09  | 1.58  |
| 243833 | 'Zfp128'        | 0     | 1.45  | 0.01 | 0.01 | 4.38 | 0     | 4.13 | 2.4   | 3.47  | 1.83  |
| 243834 | 'Zfp324'        | 0.86  | 0     | 0.09 | 0.04 | 4.46 | 0.09  | 0.36 | 0     | 2.33  | 4.47  |
| 243842 | 'Bicra'         | 0.12  | 0.45  | 1.19 | 0    | 1.09 | 0.01  | 0.94 | 0.97  | 0.77  | 0.09  |
| 243846 | 'Ccdc9'         | 0.8   | 0.61  | 0.69 | 0    | 4.34 | 4.65  | 0.07 | 1.68  | 6.78  | 1.41  |
| 243853 | 'Fkrp'          | 21.28 | 33.91 | 18.2 | 12.9 | 5.54 | 13.96 | 26.3 | 19.15 | 14.6  | 29.01 |
| 243864 | 'Mill2'         | 0.03  | 0.31  | 0.06 | 0.35 | 5.78 | 6.21  | 0.48 | 1.75  | 5.11  | 10.68 |
| 243867 | 'Fbxo46'        | 8.27  | 3.57  | 5.26 | 0.34 | 1.4  | 0.58  | 3.52 | 2.4   | 2.22  | 6.59  |
| 243874 | 'Nlrp9b'        | 0     | 0     | 0    | 0    | 0    | 0     | 0    | 0     | 0.04  | 0     |
| 243880 | 'Nlrp4a'        | 0     | 0     | 0    | 0    | 0.01 | 0.02  | 0    | 0     | 0     | 0     |
| 243897 | 'Ggn'           | 0     | 0     | 0    | 0    | 0.27 | 0     | 0    | 0     | 0     | 0.48  |
| 243905 | 'Zfp568'        | 0.4   | 0     | 0.01 | 0.06 | 0    | 0.07  | 0    | 0     | 2.7   | 0.64  |
| 243906 | 'Zfp14'         | 8.77  | 2.65  | 4.39 | 5.81 | 7.85 | 8.8   | 3.9  | 8.25  | 7.37  | 7.66  |
| 243910 | 'Nfkbid'        | 2.09  | 4.33  | 1.41 | 0    | 6.54 | 2.22  | 0.03 | 3.3   | 0     | 0     |
| 243911 | 'Kirrel2'       | 0     | 1.57  | 0    | 12.7 | 0    | 0     | 0    | 0     | 0     | 0     |
| 243912 | 'Hspb6'         | 10.11 | 24.12 | 19.7 | 32   | 0.15 | 26.82 | 20.3 | 24.7  | 24.27 | 14.94 |
| 243914 | 'Lgi4'          | 1.33  | 0     | 3.17 | 0    | 0.15 | 2.05  | 3.57 | 0.61  | 1.69  | 0     |
| 243923 | 'Rgs9bp'        | 0     | 0     | 0.01 | 0    | 0    | 1.5   | 0    | 0     | 0     | 1.13  |
| 243931 | 'Tshz3'         | 0.09  | 0.14  | 0.32 | 0.03 | 2.64 | 0     | 0    | 0     | 0     | 0.08  |
| 243937 | 'Zfp536'        | 0     | 1.41  | 2.85 | 0    | 1.7  | 0.63  | 0    | 0.55  | 0     | 1.14  |
| 243961 | 'Shank1'        | 4.42  | 4.23  | 4.47 | 3.77 | 8.47 | 3.58  | 2.07 | 3.16  | 4.9   | 2.62  |
| 243963 | 'Zfp473'        | 0.03  | 0     | 0    | 0.73 | 0.13 | 0     | 0.01 | 0.01  | 0     | 0.19  |
| 243967 | 'Ntn5'          | 0     | 0     | 0    | 0    | 0.03 | 0     | 0    | 0     | 0     | 0     |
| 243983 | 'Zdhhc13'       | 9.36  | 5.88  | 7.09 | 22.5 | 8.95 | 19    | 5.81 | 15.82 | 4.11  | 13.14 |
| 244058 | 'Rgma'          | 0.13  | 0.47  | 0.75 | 0.29 | 0.07 | 0.11  | 0.55 | 0.05  | 1.83  | 0.01  |
| 244059 | 'Chd2'          | 4.62  | 6.43  | 3.38 | 9.59 | 5.72 | 8.43  | 0.91 | 4.5   | 6.71  | 7.9   |
| 244091 | 'Fsd2'          | 1.79  | 0     | 0.05 | 0    | 0.02 | 0.02  | 0    | 0.01  | 0.01  | 0.03  |
| 244141 | 'Nars2'         | 13.9  | 22.6  | 14.9 | 1.11 | 8.91 | 13.04 | 29.9 | 15.64 | 12.85 | 14.42 |
| 244144 | 'Usp35'         | 1.45  | 2     | 7.71 | 0.03 | 5.29 | 0.9   | 0    | 2.64  | 1.88  | 0.98  |
| 244152 | 'Tsku'          | 0     | 0.02  | 0.02 | 0    | 0.32 | 0     | 0    | 0.06  | 0     | 0     |
| 244198 | 'Olfml1'        | 8.45  | 1.69  | 0    | 0    | 5.81 | 12.97 | 0.03 | 0     | 3.14  | 0     |
| 244202 | 'Nlrp10'        | 0     | 0     | 0.01 | 0    | 0    | 0     | 0    | 0     | 0     | 0     |
| 244216 | 'Zfp771'        | 34.29 | 34.32 | 24.1 | 16.8 | 25.1 | 21.94 | 56.4 | 26.78 | 37.05 | 16.03 |
| 244219 | 'Zfp668'        | 6.02  | 5.61  | 7.89 | 1.02 | 4.85 | 1.32  | 3.22 | 5.83  | 6.05  | 5.85  |
| 244233 | 'Cd16311'       | 0     | 0     | 0    | 0    | 0    | 0     | 0    | 0     | 0.56  | 0     |
| 244237 | 'Tnfrsf26'      | 0     | 0     | 0    | 0    | 0.16 | 0     | 0    | 0     | 0     | 0     |
| 244238 | 'Mrgpre'        | 16.95 | 8.58  | 27.2 | 12.8 | 11.7 | 8.76  | 26.7 | 18.72 | 27.23 | 24.16 |
| 244281 | 'Myo16'         | 0.25  | 0.78  | 0.67 | 0.73 | 0.36 | 0.87  | 1.22 | 0.15  | 0.47  | 1.39  |
| 244310 | 'Dlgap2'        | 8.48  | 1.91  | 9.26 | 1.89 | 1.7  | 3.55  | 6.31 | 5.75  | 11.52 | 4.47  |
| 244329 | 'McpH1'         | 6.82  | 2.76  | 2.32 | 1.06 | 3.24 | 6.86  | 3.86 | 1.08  | 4.14  | 7.93  |
| 244349 | 'Kat6a'         | 1.88  | 2.4   | 2.55 | 1.73 | 0.66 | 1.83  | 0.5  | 1.28  | 2.76  | 2.84  |
| 244373 | 'Erlin2'        | 26.47 | 20.75 | 29.6 | 24.8 | 33.3 | 13.39 | 17   | 25.48 | 55.95 | 35.53 |
| 244416 | 'Ppp1r3b'       | 0     | 0     | 0.01 | 0    | 0    | 0     | 0    | 0     | 0     | 0     |
| 244418 | 'Prag1'         | 3.64  | 7.25  | 2.7  | 0.07 | 0.64 | 0.07  | 2.07 | 1.23  | 0.01  | 1.32  |
| 244421 | 'Lonrf1'        | 0.99  | 2.47  | 2.34 | 5.58 | 0    | 0     | 1.43 | 1.08  | 0     | 0     |
| 244431 | 'SgcZ'          | 1.99  | 3.21  | 0    | 3.79 | 1.83 | 1.75  | 2.41 | 8.77  | 0.86  | 3.43  |
| 244484 | 'Wdr17'         | 6.7   | 6.65  | 6.12 | 11.2 | 9.96 | 5.53  | 2.51 | 8.23  | 8.68  | 3.44  |



|        |             |       |       |      |      |      |       |      |       |       |        |
|--------|-------------|-------|-------|------|------|------|-------|------|-------|-------|--------|
| 244495 | 'Sgo2b'     | 0     | 0     | 0    | 0    | 0.43 | 0     | 0    | 0     | 0     | 0      |
| 244548 | 'Elmod2'    | 2.02  | 0.9   | 4.21 | 3.63 | 0.98 | 3.72  | 7.22 | 3.09  | 9.99  | 7.69   |
| 244550 | 'Podnl1'    | 0.19  | 0     | 1.93 | 1.4  | 0    | 0.85  | 0    | 0.02  | 0     | 0      |
| 244551 | 'Nanos3'    | 0.04  | 0.74  | 1.46 | 5.84 | 1.72 | 0     | 0.87 | 0.59  | 1.86  | 0      |
| 244556 | 'Zfp791'    | 3.87  | 4.55  | 4.19 | 0.07 | 3.74 | 0.72  | 0.09 | 0.04  | 6.52  | 2.69   |
| 244562 | 'Abcc12'    | 0     | 0     | 0    | 0    | 0    | 0.12  | 0    | 0     | 0     | 1.14   |
| 244579 | 'Tox3'      | 0.5   | 0     | 0    | 0    | 1.49 | 1.43  | 0.7  | 0.39  | 0     | 0      |
| 244585 | 'Rpgr11'    | 7.04  | 3.61  | 3    | 0.71 | 9.13 | 9.91  | 4.36 | 1.74  | 5.93  | 8.42   |
| 244595 | 'Ces1a'     | 0     | 0     | 0    | 0    | 0    | 0     | 0    | 0.03  | 0     | 0      |
| 244608 | 'Ccdc113'   | 6.3   | 16    | 7.47 | 12.8 | 3.72 | 8.42  | 3.17 | 4.49  | 0.66  | 14.57  |
| 244631 | 'Pskh1'     | 0     | 2.49  | 6.34 | 0    | 7.47 | 0     | 4.39 | 0.68  | 0     | 8.93   |
| 244646 | 'Pkd1l3'    | 0.01  | 0.09  | 0.07 | 0.01 | 0    | 0     | 0    | 0.03  | 0.03  | 0      |
| 244650 | 'Phlpp2'    | 2.47  | 2.09  | 2.21 | 4.67 | 3.88 | 5.32  | 3.16 | 2.45  | 1.07  | 3.76   |
| 244653 | 'Hydin'     | 0     | 0.39  | 0.01 | 0    | 0.02 | 0.06  | 0    | 0     | 0     | 0.01   |
| 244654 | 'Mtss1l'    | 5.59  | 8.57  | 9.62 | 1.98 | 11.8 | 6.97  | 10   | 5.49  | 2.91  | 8.2    |
| 244666 | 'Sprtn'     | 0.07  | 0.97  | 9.35 | 0.94 | 0    | 0.22  | 0    | 0.7   | 4.09  | 2.05   |
| 244667 | 'Disc1'     | 0.55  | 0.1   | 0.88 | 2.3  | 0    | 0.01  | 2.42 | 1.32  | 0.01  | 1.76   |
| 244668 | 'Sipa1l2'   | 0     | 0     | 0.74 | 0    | 0.01 | 0     | 0    | 1     | 2.66  | 0.17   |
| 244672 | 'Cwf19l2'   | 1.09  | 5.98  | 4.46 | 7    | 1.23 | 9.42  | 2.63 | 1.21  | 1.62  | 3.43   |
| 244682 | 'Cntn5'     | 3.57  | 1.34  | 4.83 | 0.59 | 14.8 | 7.49  | 13.3 | 6.27  | 0     | 5.89   |
| 244694 | 'Kdm4d'     | 0.05  | 1.17  | 0.39 | 8.81 | 3.55 | 0.4   | 0    | 7.04  | 2.88  | 0.02   |
| 244713 | 'Zfp317'    | 9.96  | 5.09  | 7.47 | 5.01 | 4.64 | 2.24  | 5.37 | 10.59 | 8.23  | 6.91   |
| 244721 | 'Zfp846'    | 9.49  | 4.62  | 9.01 | 0.88 | 5.92 | 2.89  | 10.4 | 7.36  | 5.55  | 9.81   |
| 244723 | 'Olfm2'     | 80.25 | 118.9 | 66.3 | 92.3 | 108  | 37.46 | 73.2 | 96.24 | 26.94 | 37.34  |
| 244745 | 'Dpy19l1'   | 3.39  | 6.73  | 15.7 | 16.6 | 11.2 | 7.77  | 11.2 | 5.99  | 3.76  | 1.79   |
| 244757 | 'Glb1l2'    | 0.73  | 0.05  | 0.01 | 0    | 8.77 | 0     | 0    | 0     | 0     | 4.74   |
| 244810 | 'AW551984'  | 195.3 | 232.6 | 125  | 119  | 84.5 | 97.4  | 193  | 133.9 | 133.2 | 209.95 |
| 244813 | 'Bsx'       | 0     | 0     | 0    | 0    | 5.48 | 0     | 0    | 0     | 0     | 0      |
| 244853 | 'Nxpe4'     | 2.2   | 0.59  | 4.3  | 0.3  | 0.15 | 0     | 0.02 | 0     | 0     | 1.63   |
| 244864 | 'Layn'      | 0.73  | 1.27  | 1.26 | 1.44 | 2.72 | 0.94  | 4.23 | 0.41  | 4.57  | 0.63   |
| 244867 | 'Arhgap20'  | 3.14  | 2.8   | 3.01 | 3.82 | 3.36 | 1.23  | 0.5  | 0.25  | 1.05  | 4.24   |
| 244871 | 'Zc3h12c'   | 3.15  | 3.83  | 1.81 | 4.68 | 3.07 | 0.67  | 2.29 | 1.89  | 2.4   | 1.15   |
| 244879 | 'Npat'      | 5.31  | 1.89  | 2.58 | 10.7 | 0.61 | 1.08  | 4.25 | 2.18  | 4.36  | 5.55   |
| 244882 | 'Tnfaip8l3' | 0     | 5.13  | 1.92 | 0    | 0    | 4.97  | 1.39 | 7.26  | 9.96  | 2.77   |
| 244885 | 'Sh2d7'     | 0.28  | 0.37  | 0.04 | 0    | 0.05 | 0.44  | 0.33 | 0.19  | 0.17  | 0.06   |
| 244886 | 'Tmem266'   | 7.99  | 7.38  | 3.62 | 14.1 | 3.38 | 0     | 3.77 | 6.12  | 0     | 0.04   |
| 244891 | 'Scaper'    | 9.97  | 9.88  | 9.51 | 5.69 | 4.05 | 10.17 | 9.59 | 6.7   | 9.96  | 7.67   |
| 244895 | 'Peak1'     | 0.04  | 0.02  | 0.16 | 0.9  | 0.35 | 0.25  | 0.24 | 0.75  | 1.13  | 0.32   |
| 244923 | 'Klhl31'    | 0.01  | 0.01  | 0.02 | 0    | 0    | 0.02  | 0.33 | 0.01  | 0.02  | 0.11   |
| 244954 | 'Prss35'    | 3.61  | 2.82  | 0.8  | 1.13 | 0.63 | 1.04  | 0.21 | 4.38  | 0.57  | 0.5    |
| 244958 | 'Mrap2'     | 306.7 | 90.7  | 85.5 | 76.2 | 80.2 | 161.5 | 96.1 | 199.8 | 175.1 | 194.54 |
| 244962 | 'Snx14'     | 24.99 | 24.76 | 25.5 | 22.6 | 17.9 | 18.58 | 38.6 | 19.01 | 38.5  | 28.59  |
| 245000 | 'Atr'       | 0.13  | 0.92  | 0.15 | 0.16 | 0.02 | 0     | 0.11 | 1.55  | 1.35  | 1.91   |
| 245007 | 'Zbtb38'    | 3.57  | 5.33  | 7.44 | 10.4 | 2.55 | 6.51  | 10.5 | 2.66  | 6.44  | 1.64   |
| 245020 | 'Slc35g2'   | 91.98 | 84.94 | 64.8 | 0.55 | 76.4 | 138.7 | 101  | 82.3  | 134.2 | 113.82 |
| 245026 | 'Col6a6'    | 0     | 0     | 0    | 0    | 0    | 0     | 0    | 0     | 1.81  | 0.45   |
| 245038 | 'Dclk3'     | 9.65  | 17.16 | 1.49 | 0.05 | 9.98 | 19.08 | 15   | 5.18  | 9.07  | 3.21   |
| 245049 | 'Myrip'     | 2.73  | 0.14  | 0.84 | 0.03 | 2.07 | 1.08  | 1.33 | 1.52  | 1.64  | 1.66   |
| 245050 | 'Fam198a'   | 1.98  | 4.93  | 1.33 | 0    | 1.21 | 0     | 0    | 0.04  | 2.79  | 0      |
| 245126 | 'Tarm1'     | 0     | 0     | 0    | 0    | 0.16 | 0     | 0    | 0     | 0     | 0      |
| 245174 | 'Zfp937'    | 3.6   | 5.44  | 3.82 | 4.07 | 8.2  | 2.23  | 7.1  | 1.24  | 8.69  | 8.2    |
| 245269 | 'Nim1k'     | 7.45  | 7.73  | 8.16 | 11.5 | 2.53 | 1.25  | 0.42 | 10.63 | 0.92  | 7.73   |
| 245308 | 'Zdhhc19'   | 0     | 0     | 0    | 0    | 2.36 | 0     | 0    | 0     | 0     | 0      |
| 245350 | 'AA414768'  | 13.72 | 28.67 | 12.9 | 23   | 17.5 | 18.99 | 9.92 | 15.96 | 18.85 | 7.93   |
| 245368 | 'Zfp300'    | 3.6   | 2.6   | 0.23 | 0.52 | 3.03 | 0.26  | 1.94 | 0.21  | 2.27  | 1.67   |
| 245386 | 'Tmem255a'  | 171.9 | 132.4 | 103  | 93.9 | 140  | 96.83 | 102  | 127.7 | 97.88 | 136.39 |
| 245403 | 'Dcaf12l2'  | 3.01  | 1.36  | 0.89 | 0.04 | 1.07 | 0.06  | 0    | 1.47  | 0.01  | 0.32   |
| 245404 | 'Dcaf12l1'  | 58.11 | 48.23 | 45.4 | 27   | 55.7 | 77.44 | 68.1 | 64.41 | 48.5  | 60.7   |

|        |           |       |       |      |      |      |       |      |       |       |        |
|--------|-----------|-------|-------|------|------|------|-------|------|-------|-------|--------|
| 245423 | 'Gm364'   | 0     | 0     | 0    | 0    | 0    | 0     | 0    | 0     | 0     | 0.94   |
| 245424 | 'Gpr101'  | 20.87 | 7.67  | 13.2 | 0    | 14.5 | 21.75 | 35.6 | 44.21 | 156.2 | 88.09  |
| 245440 | 'Gm4988'  | 37.62 | 31.74 | 27.6 | 15.6 | 24.8 | 27.93 | 29.7 | 29.22 | 31.55 | 27.55  |
| 245446 | 'Slitrk4' | 8.25  | 5.43  | 7.97 | 0    | 14.5 | 5.37  | 15.6 | 12.78 | 1.24  | 3.59   |
| 245450 | 'Slitrk2' | 4.82  | 2.03  | 2.24 | 3.16 | 1.52 | 0.75  | 1.68 | 1.72  | 3.22  | 1.09   |
| 245468 | 'Pnma3'   | 8.65  | 6.11  | 3.03 | 4.77 | 11.4 | 8.09  | 6.74 | 4.8   | 7.66  | 15.69  |
| 245469 | 'Pdzd4'   | 3.9   | 4.1   | 1.56 | 0    | 2.82 | 1.75  | 7.01 | 1.78  | 3.55  | 2.47   |
| 245474 | 'Dkc1'    | 21.38 | 13.19 | 13.2 | 16.7 | 6.59 | 26.47 | 16.2 | 18.44 | 20.11 | 28.96  |
| 245522 | 'Zc4h2'   | 2.55  | 6.38  | 6.41 | 15   | 10.7 | 12.2  | 10.7 | 8.2   | 8.55  | 5.2    |
| 245526 | 'Pgr15l'  | 0.04  | 0.69  | 3.85 | 0.49 | 0.04 | 0.63  | 0    | 0.61  | 0.96  | 1.12   |
| 245527 | 'Eda2r'   | 0     | 0     | 0    | 0    | 0    | 0     | 0.01 | 0     | 0     | 0.16   |
| 245532 | 'Awat2'   | 0     | 0     | 2.72 | 0    | 0    | 0     | 0    | 0     | 0     | 0      |
| 245537 | 'Nlgn3'   | 20.06 | 26.03 | 47.6 | 8.8  | 21.9 | 11.19 | 44.1 | 16.09 | 18.2  | 27.78  |
| 245555 | 'Nexmif'  | 2.67  | 2.47  | 2.53 | 5.46 | 1.75 | 0.25  | 1.6  | 2.56  | 1.05  | 0.85   |
| 245578 | 'Pcdh11x' | 15.46 | 11.65 | 17   | 1.91 | 6.77 | 7.62  | 4.17 | 12.22 | 4.15  | 5.77   |
| 245595 | 'Zfp711'  | 0.92  | 7.07  | 3.76 | 11.8 | 5.85 | 0.32  | 9.27 | 6.31  | 4.53  | 3.31   |
| 245596 | 'Hdx'     | 0.82  | 1     | 1.13 | 2.56 | 1.8  | 3.47  | 2.25 | 1.3   | 1.28  | 0      |
| 245607 | 'Gprasp2' | 247   | 227   | 265  | 244  | 200  | 91.94 | 291  | 239.8 | 289.3 | 320.09 |
| 245610 | 'Nxf3'    | 0.72  | 0     | 0    | 0    | 0    | 0     | 0    | 0     | 1.83  | 1.18   |
| 245615 | 'Kir3dl2' | 3.76  | 1.67  | 0    | 0    | 0    | 0.27  | 0    | 5.24  | 0     | 0.04   |
| 245616 | 'Kir3dl1' | 0     | 0     | 0    | 0    | 0    | 0     | 0    | 0.08  | 0     | 0      |
| 245622 | 'Fam199x' | 0.85  | 0.1   | 2.84 | 1.54 | 0.37 | 0.49  | 1.95 | 0.92  | 2.21  | 1.43   |
| 245631 | 'Mum11l'  | 2.01  | 3.54  | 4.54 | 3.39 | 3.43 | 1.54  | 4.71 | 2.12  | 4.27  | 0.04   |
| 245638 | 'Tbc1d8b' | 0.01  | 0     | 0.06 | 0.02 | 0.16 | 0.01  | 0.01 | 0.01  | 0.02  | 0.01   |
| 245643 | 'Frmpp3'  | 1.87  | 7.68  | 4.34 | 7.95 | 10.4 | 7.46  | 12.3 | 1.6   | 12.89 | 3.99   |
| 245650 | 'Gucy2f'  | 0     | 0.1   | 0.11 | 0    | 0    | 0     | 0.58 | 0.01  | 0     | 0      |
| 245666 | 'Iqsec2'  | 0.86  | 1.21  | 2.44 | 2.85 | 2.27 | 1.07  | 1.19 | 1.21  | 0.95  | 0.28   |
| 245670 | 'Rragb'   | 8.95  | 8.22  | 11.3 | 9.52 | 6.46 | 9.16  | 13.2 | 11.98 | 12.63 | 9.21   |
| 245671 | 'Klf8'    | 0     | 0.03  | 0.02 | 0.02 | 0    | 0.35  | 0.02 | 1.57  | 5.11  | 1.22   |
| 245683 | 'Klhl34'  | 0.98  | 1.45  | 0    | 0.06 | 0    | 0     | 0    | 0     | 0     | 0      |
| 245684 | 'Cnksr2'  | 1.79  | 3.96  | 5.12 | 6.1  | 1.28 | 3.56  | 3.4  | 0.67  | 0.78  | 1.75   |
| 245688 | 'Rbbp7'   | 168.2 | 196.9 | 133  | 353  | 137  | 117   | 109  | 167.7 | 129.5 | 164.13 |
| 245695 | 'Tceanc'  | 2.2   | 1.06  | 0.97 | 0.17 | 0.57 | 0     | 0.01 | 0.08  | 0.08  | 0.03   |
| 245828 | 'Trappc1' | 99.65 | 104.6 | 82.6 | 91.9 | 117  | 125.1 | 59.4 | 124.8 | 119.5 | 96.62  |
| 245839 | 'Gzmn'    | 0     | 0     | 0.69 | 0    | 0    | 0     | 0    | 0     | 0     | 0      |
| 245841 | 'Polr2h'  | 45.46 | 31.29 | 57.5 | 60.2 | 53.7 | 58.37 | 62.3 | 51.7  | 33.5  | 55.58  |
| 245847 | 'Amdhd2'  | 19.87 | 18.48 | 24.1 | 4.03 | 26.3 | 46.7  | 14.6 | 40.9  | 20.34 | 35.96  |
| 245857 | 'Ssh3'    | 16.52 | 26.5  | 9.8  | 13.3 | 23.3 | 0.54  | 30.9 | 27.9  | 14.97 | 35.57  |
| 245860 | 'Atg9a'   | 22.74 | 26.5  | 27   | 9.15 | 25.8 | 9.51  | 33.8 | 22.38 | 39.23 | 33.4   |
| 245865 | 'Spag4'   | 1.7   | 3.3   | 2.21 | 0    | 10.3 | 5.21  | 8.03 | 5.65  | 30.51 | 9.66   |
| 245866 | 'Ift52'   | 30.19 | 20.92 | 27.8 | 33.7 | 39.1 | 14.68 | 21.1 | 25.91 | 14.74 | 42.41  |
| 245867 | 'Pcmt2'   | 17.78 | 19.11 | 15.4 | 18.9 | 12.4 | 3.79  | 8.34 | 19.23 | 7.08  | 19.37  |
| 245877 | 'Map7d1'  | 22.86 | 22.73 | 16.8 | 31.4 | 27.2 | 9.72  | 11.5 | 12.18 | 16.63 | 11.17  |
| 245880 | 'Wasf3'   | 4.4   | 6.79  | 10.5 | 6.9  | 14.2 | 11.43 | 6.47 | 5.09  | 9.68  | 4.4    |
| 245884 | 'Fam71f2' | 0     | 2.54  | 1.77 | 0    | 0    | 0     | 0    | 0     | 0.13  | 0      |
| 245886 | 'Ankrd27' | 22.79 | 10.04 | 3.9  | 13.1 | 6.95 | 8.36  | 4.77 | 10.3  | 10.38 | 9.06   |
| 245902 | 'Ccdc15'  | 2.09  | 0     | 1.9  | 1.29 | 0.99 | 1.53  | 0    | 0     | 1.2   | 0.89   |
| 245944 | 'Vps54'   | 2.52  | 0.25  | 1.05 | 9.26 | 0.48 | 0.41  | 1.26 | 2.2   | 0.04  | 0.06   |
| 245945 | 'Rbm47'   | 0     | 0     | 0    | 0    | 0    | 0.02  | 0.28 | 0     | 0     | 0      |
| 246048 | 'Chodl'   | 55.56 | 84.1  | 0.04 | 54.4 | 8.65 | 1.51  | 0.07 | 11.81 | 3.15  | 0.03   |
| 246049 | 'Slc36a2' | 0     | 0     | 0.04 | 0    | 0    | 0     | 0    | 0.02  | 0     | 0      |
| 246086 | 'Onecut3' | 0     | 0.24  | 0    | 0    | 0.19 | 0.46  | 0    | 0     | 0.34  | 3.56   |
| 246102 | 'Rttn'    | 1.02  | 0     | 0    | 2.33 | 0.09 | 0.12  | 0.11 | 0.9   | 0.15  | 0      |
| 246103 | 'Atxn7'   | 1.26  | 1.16  | 1.01 | 1.16 | 2.65 | 0.02  | 1.72 | 0.58  | 0.06  | 1.23   |
| 246104 | 'Rhbdl3'  | 0     | 0     | 1.15 | 0.01 | 0.32 | 0     | 0    | 0.67  | 0.11  | 1.48   |
| 246133 | 'Kcne2'   | 0     | 0     | 0    | 7.77 | 0.03 | 0     | 0    | 0     | 0     | 0      |
| 246154 | 'Vasn'    | 5.23  | 6.35  | 6.16 | 5.35 | 0    | 0.01  | 2.48 | 1.01  | 0     | 0.01   |
| 246179 | 'Fktn'    | 21.55 | 7.61  | 9.05 | 11.6 | 5.38 | 3.94  | 9.75 | 16.59 | 5.13  | 8.24   |

|        |            |       |       |      |      |      |       |      |       |       |        |
|--------|------------|-------|-------|------|------|------|-------|------|-------|-------|--------|
| 246190 | 'Otoa'     | 0.58  | 0     | 0    | 0    | 0    | 0     | 0    | 0.63  | 0     | 0      |
| 246196 | 'Zfp277'   | 18.35 | 23.26 | 25.2 | 40.3 | 27.1 | 22.41 | 19.7 | 13.85 | 37.71 | 20.73  |
| 246198 | 'Mllt6'    | 1.51  | 5.18  | 2.91 | 0    | 5.52 | 4.71  | 3.87 | 3.49  | 3.78  | 1.59   |
| 246221 | 'Mpst'     | 3.52  | 3.15  | 0    | 0    | 2.91 | 0     | 0    | 2.76  | 7.71  | 0.07   |
| 246228 | 'Vwa1'     | 7.74  | 1.9   | 13.9 | 6.98 | 7.72 | 16.11 | 26.1 | 10.97 | 31.77 | 20.77  |
| 246229 | 'Bivm'     | 3     | 4.76  | 0.24 | 3.99 | 1.14 | 0.88  | 1.61 | 5.91  | 2.56  | 7.11   |
| 246257 | 'Ovca2'    | 2.5   | 0.69  | 10.7 | 6.7  | 2.58 | 4.7   | 1.35 | 2.64  | 1.72  | 3.7    |
| 246277 | 'Csad'     | 16.1  | 9.79  | 5.02 | 17.9 | 23.9 | 17.68 | 17.2 | 0.23  | 5.66  | 14.32  |
| 246293 | 'Klhl8'    | 3.26  | 10.61 | 6.12 | 0.61 | 9.29 | 7.67  | 3.22 | 9.38  | 4.46  | 0.01   |
| 246313 | 'Prokr2'   | 0     | 0     | 5.68 | 0    | 2.36 | 18.26 | 0    | 0     | 2.55  | 11.66  |
| 246316 | 'Lgi2'     | 0.81  | 0.76  | 0.03 | 0    | 2.36 | 0     | 1.3  | 0.01  | 0     | 0.84   |
| 246317 | 'Neto1'    | 1.82  | 3.27  | 0.67 | 0.92 | 4.41 | 7.08  | 2.5  | 0.62  | 0.97  | 0      |
| 246691 | 'Prok1'    | 0     | 0     | 0    | 0.71 | 0    | 0     | 0    | 0     | 0     | 0      |
| 246694 | 'Hps5'     | 0.01  | 2.1   | 2.33 | 0.3  | 6.54 | 1.12  | 1.6  | 1.62  | 1.64  | 1.66   |
| 246696 | 'Slc25a28' | 3.1   | 2.9   | 4.87 | 57.2 | 0.88 | 2.59  | 21.4 | 3.76  | 19.97 | 8.43   |
| 246703 | 'Naxe'     | 207.9 | 170.4 | 239  | 120  | 286  | 280.5 | 309  | 255   | 216.1 | 235.26 |
| 246707 | 'Emilin2'  | 0     | 0.17  | 0.6  | 0.87 | 0.05 | 0     | 0    | 0     | 0     | 0      |
| 246710 | 'Rhobtb2'  | 3.07  | 1.69  | 1.13 | 0.23 | 3.74 | 3.67  | 2.8  | 1.26  | 5.23  | 2.22   |
| 246727 | 'Oas3'     | 0.25  | 3.01  | 0.38 | 0.77 | 0.32 | 0.31  | 0.37 | 0.24  | 0.19  | 0.43   |
| 246728 | 'Oas2'     | 0     | 0     | 0.02 | 0    | 0    | 0     | 0    | 0     | 0     | 0      |
| 246730 | 'Oas1a'    | 0     | 0     | 0    | 0    | 0.86 | 0.03  | 0    | 0     | 0     | 4.1    |
| 246735 | 'AY074887' | 0.07  | 0.07  | 0.29 | 0.34 | 0.07 | 9.12  | 0.15 | 0.18  | 0.32  | 0      |
| 246738 | 'Dnajc28'  | 5.1   | 5.42  | 4.69 | 0.02 | 0    | 11.99 | 2.1  | 8.21  | 4.87  | 11.59  |
| 246746 | 'Cd300lf'  | 0.1   | 0.01  | 0.14 | 0.12 | 0.07 | 0.03  | 0.17 | 0.03  | 0.07  | 0.08   |
| 246747 | 'Adig'     | 0.61  | 0     | 1.64 | 0    | 0    | 0     | 0    | 0     | 0     | 0      |
| 246782 | 'Atpaf2'   | 11.7  | 41.68 | 34.7 | 34.1 | 38.9 | 30.8  | 50.1 | 26.41 | 39.05 | 54.4   |
| 246787 | 'Slc5a2'   | 0     | 0.38  | 0    | 0    | 0    | 0     | 0    | 0     | 0     | 0      |
| 246788 | 'Trpv3'    | 0     | 0     | 0    | 0    | 0    | 0     | 0    | 0     | 0.15  | 0      |
| 252830 | 'Obox6'    | 0     | 1.79  | 0    | 0    | 0    | 0     | 0    | 0     | 0     | 0      |
| 252837 | 'Ackr4'    | 0.04  | 0     | 0.09 | 0    | 0    | 0     | 0.07 | 0     | 0     | 0      |
| 252838 | 'Tox'      | 7.18  | 34.04 | 12.2 | 27.1 | 18.2 | 9.27  | 17   | 1.33  | 15.19 | 14.82  |
| 252864 | 'Dusp15'   | 8.73  | 7.42  | 5.5  | 0    | 6.64 | 8     | 9.68 | 4.78  | 3.4   | 8.29   |
| 252868 | 'Odf4'     | 0.08  | 0     | 0.63 | 0.21 | 0    | 4.59  | 0.46 | 0     | 0.09  | 0      |
| 252870 | 'Usp7'     | 2.04  | 2.04  | 5.46 | 3.23 | 5.82 | 11.37 | 1.87 | 1.76  | 4.92  | 1.52   |
| 252875 | 'Mios'     | 1.72  | 7.42  | 2.22 | 4.68 | 1.17 | 4.05  | 9.32 | 3.45  | 5.91  | 0.84   |
| 252876 | 'Gin1'     | 2.89  | 1.12  | 7    | 1.49 | 6.13 | 18.49 | 13.6 | 5.95  | 0     | 7.72   |
| 252903 | 'Ap1s3'    | 0.76  | 0.63  | 0.78 | 1.14 | 2    | 0.7   | 0.78 | 0.86  | 3     | 2.92   |
| 252966 | 'Cables2'  | 1.54  | 2.22  | 0.07 | 6.14 | 2.87 | 1     | 3.78 | 2.15  | 0.12  | 0.03   |
| 252967 | 'Ropn1l'   | 0.2   | 2.31  | 0.17 | 1.31 | 0    | 0.21  | 0.75 | 4.33  | 0     | 3.48   |
| 252972 | 'Tpcn1'    | 2.5   | 0.41  | 2.44 | 7.11 | 0.77 | 1.41  | 0.04 | 0     | 5.53  | 0.44   |
| 252973 | 'Grhl2'    | 0     | 0.31  | 0    | 1.21 | 0    | 0     | 0.18 | 0.11  | 0     | 0      |
| 252974 | 'Tspear'   | 0     | 2.4   | 2.04 | 5.8  | 8.47 | 0     | 0.02 | 0     | 2.45  | 3.57   |
| 257630 | 'Il17f'    | 0.02  | 0.38  | 0    | 0    | 0    | 0     | 0    | 0     | 0     | 0      |
| 257632 | 'Nod2'     | 0     | 0     | 0    | 1.97 | 0.02 | 0     | 0    | 0.2   | 0     | 0      |
| 257633 | 'Acsf3'    | 11.26 | 22.92 | 30   | 5.89 | 17.2 | 22.56 | 17.7 | 16.11 | 23.91 | 23.05  |
| 257635 | 'Sdsl'     | 7.63  | 4.39  | 2.65 | 1.89 | 5.12 | 10.38 | 4.66 | 4.69  | 1.31  | 6.04   |
| 257882 | 'Olf1344'  | 2.9   | 0     | 7.4  | 0    | 0    | 0     | 0    | 0     | 0.42  | 0.05   |
| 257884 | 'Olf1744'  | 0     | 0     | 0    | 0    | 0.05 | 0     | 0    | 0     | 0     | 0      |
| 257891 | 'Olf1479'  | 0     | 0     | 0    | 0    | 0    | 0.05  | 0    | 0     | 0     | 0      |
| 257892 | 'Olf1324'  | 0     | 0     | 4.72 | 0    | 0    | 0     | 0    | 2.72  | 0     | 0      |
| 257926 | 'Olf1544'  | 0     | 0     | 0    | 0    | 0.18 | 0     | 0    | 0     | 0     | 0      |
| 257932 | 'Olf1332'  | 0.45  | 0.82  | 2.79 | 0.29 | 0    | 0     | 0    | 0     | 0     | 1.64   |
| 257947 | 'Olf1543'  | 0     | 0     | 0    | 0    | 0    | 0     | 0    | 0     | 3.33  | 0      |
| 258008 | 'Olf1513'  | 0     | 0     | 0.05 | 0    | 0    | 0     | 0    | 0     | 0     | 0      |
| 258019 | 'Olf1212'  | 0     | 0.05  | 0    | 0    | 0    | 0.02  | 0    | 0     | 0     | 0      |
| 258020 | 'Olf1213'  | 0     | 0     | 0    | 0.06 | 0    | 0     | 0    | 0     | 0     | 0      |
| 258028 | 'Olf1901'  | 0     | 0     | 0    | 0    | 0    | 0     | 0    | 0     | 0     | 3.38   |
| 258064 | 'Olf1316'  | 0     | 0     | 0.05 | 0    | 0    | 0     | 0    | 0     | 0     | 0.02   |

|        |              |       |       |      |      |      |       |      |       |       |       |
|--------|--------------|-------|-------|------|------|------|-------|------|-------|-------|-------|
| 258068 | 'Olfr804'    | 0     | 0     | 0    | 0    | 0    | 0     | 0    | 0     | 0.05  | 0     |
| 258148 | 'Olfr789'    | 0     | 0     | 0    | 0    | 0    | 0     | 0    | 0     | 0     | 0.05  |
| 258364 | 'Olfr976'    | 0.11  | 0.1   | 0.3  | 0.48 | 0.29 | 0.28  | 0.08 | 0.22  | 0.18  | 0.05  |
| 258380 | 'Olfr461'    | 0     | 0     | 0    | 6.95 | 0    | 0     | 0    | 0     | 0     | 0     |
| 258423 | 'Olfr1510'   | 0     | 0     | 0    | 0    | 0    | 0.05  | 0    | 0     | 0     | 0     |
| 258436 | 'Olfr458'    | 0     | 0     | 0    | 0    | 0    | 0     | 0    | 0.53  | 0     | 0     |
| 258462 | 'Olfr1392'   | 0     | 0     | 0    | 0    | 0    | 0     | 0    | 1.74  | 0     | 0     |
| 258470 | 'Olfr91'     | 0     | 0     | 0    | 4.75 | 0    | 4.22  | 0    | 0     | 0     | 0     |
| 258494 | 'Olfr318'    | 0     | 0     | 2.86 | 0    | 0    | 0     | 0    | 0     | 0     | 0     |
| 258521 | 'Olfr860'    | 0.15  | 0     | 0    | 0    | 0    | 0     | 0    | 0     | 0     | 0     |
| 258540 | 'Olfr771'    | 0     | 0     | 0    | 0    | 0    | 0     | 0    | 0     | 0     | 0.05  |
| 258571 | 'Olfr1033'   | 0.26  | 0.22  | 0.01 | 0.2  | 0.15 | 0.14  | 0.33 | 0     | 0.66  | 0.13  |
| 258678 | 'Olfr1441'   | 0     | 0     | 1.15 | 0    | 0    | 0     | 0    | 0     | 0     | 0     |
| 258731 | 'Olfr491'    | 0     | 0     | 0    | 0    | 0    | 0     | 0    | 0     | 0     | 0.05  |
| 258737 | 'Olfr1316'   | 0     | 0     | 0    | 0    | 0    | 0.05  | 0    | 0     | 0     | 0     |
| 258745 | 'Olfr689'    | 0     | 0     | 0    | 0    | 3.24 | 0     | 0    | 0     | 0     | 0     |
| 258783 | 'Olfr920'    | 0     | 0     | 0    | 0    | 0    | 0     | 0    | 0     | 0     | 0.85  |
| 258819 | 'Olfr640'    | 0     | 0     | 0.11 | 0    | 0    | 0     | 0    | 0     | 0     | 0     |
| 258837 | 'Olfr545'    | 0     | 0     | 0    | 0    | 2.19 | 0     | 0    | 0     | 0     | 0     |
| 258854 | 'Olfr985'    | 0     | 0     | 0    | 0    | 0    | 0     | 0    | 0     | 0     | 2.8   |
| 258858 | 'Olfr371'    | 0     | 0     | 0.69 | 0    | 0    | 0     | 0    | 0     | 0     | 0     |
| 258871 | 'Olfr898'    | 0     | 0     | 0    | 0    | 0    | 0     | 0    | 0     | 0     | 2.67  |
| 258896 | 'Olfr1206'   | 0     | 0.11  | 0    | 0    | 0    | 0     | 0    | 0     | 0     | 0     |
| 258922 | 'Olfr267'    | 0.44  | 0     | 0    | 0    | 0    | 0     | 0    | 0     | 0     | 1.7   |
| 258938 | 'Olfr1417'   | 0     | 0     | 0    | 0    | 0    | 0     | 6.81 | 0     | 0     | 0     |
| 259009 | 'Olfr394'    | 0     | 0     | 0.05 | 0    | 0    | 0     | 0    | 0     | 0     | 0     |
| 259023 | 'Olfr1055'   | 0     | 0     | 0    | 0.1  | 0    | 0.05  | 0    | 0     | 0.04  | 0.04  |
| 259051 | 'Olfr658'    | 0     | 0     | 0    | 0    | 0    | 3.1   | 0    | 0     | 0     | 0.06  |
| 259063 | 'Olfr691'    | 0     | 0     | 1.55 | 0    | 0    | 0     | 3.38 | 0     | 5.22  | 0     |
| 259087 | 'Olfr622'    | 0     | 0     | 0    | 0    | 0    | 0     | 0.82 | 0     | 0     | 0     |
| 259104 | 'Olfr613'    | 7.05  | 7.49  | 11.3 | 10.7 | 10.5 | 8.28  | 7.56 | 5.04  | 11.29 | 7.83  |
| 259116 | 'Olfr559'    | 0     | 0     | 0    | 0.93 | 0    | 0     | 0    | 0     | 0     | 0     |
| 259122 | 'Olfr635'    | 0     | 0.11  | 0    | 0    | 0    | 0     | 0    | 0     | 0     | 0     |
| 259124 | 'Olfr638'    | 0     | 0.36  | 0    | 0    | 0    | 0     | 0    | 0     | 0     | 0     |
| 259144 | 'Olfr456'    | 0     | 0     | 0    | 0    | 0    | 0     | 0    | 0     | 0.13  | 0     |
| 259148 | 'Olfr329-ps' | 0     | 0     | 0.05 | 0    | 0    | 0     | 0    | 0     | 0     | 5.75  |
| 259172 | 'Mfrp'       | 0.15  | 0.05  | 0    | 0.44 | 0    | 0     | 0.03 | 0     | 0     | 0.05  |
| 259277 | 'Klk8'       | 0.44  | 0     | 0    | 11.1 | 0    | 0     | 0    | 0     | 0     | 0.07  |
| 259279 | 'Tubgcp3'    | 18.59 | 20.68 | 24   | 17.7 | 19.7 | 4.22  | 22.1 | 20.31 | 20.04 | 23.57 |
| 259300 | 'Ehd2'       | 0     | 0     | 0.4  | 0    | 0    | 0     | 0    | 0     | 0     | 0     |
| 259302 | 'Srgap3'     | 5.99  | 7.47  | 8.24 | 8.94 | 9.92 | 4.42  | 5.19 | 3.26  | 5.34  | 3.54  |
| 260296 | 'Trim61'     | 0     | 0.89  | 0    | 0    | 0    | 0     | 0    | 0     | 0     | 2.31  |
| 260297 | 'Prnt1'      | 7.66  | 8.09  | 4.31 | 12.8 | 9.65 | 4.45  | 10.4 | 6.49  | 5.2   | 9.87  |
| 260299 | 'Cadm4'      | 6.82  | 4.95  | 8.34 | 4.78 | 5.8  | 4.38  | 12.7 | 7.08  | 4.93  | 4.03  |
| 260302 | 'Gga3'       | 9.66  | 15.29 | 19.7 | 6.07 | 15.6 | 8.66  | 15.1 | 16.68 | 31.87 | 16.22 |
| 260305 | 'Nphp4'      | 1.91  | 2.36  | 0.79 | 1.28 | 1.93 | 3.51  | 0.86 | 2.75  | 1.37  | 1.59  |
| 260315 | 'Nav3'       | 1.66  | 3.88  | 4.56 | 0.61 | 3.73 | 3.68  | 2.34 | 1.86  | 2.54  | 3.1   |
| 260408 | 'Prss45'     | 0     | 0     | 0    | 0    | 0    | 0     | 0    | 0     | 2.96  | 0     |
| 260409 | 'Cdc42ep3'   | 15.19 | 15.03 | 12.6 | 4.96 | 11.3 | 26.27 | 25.4 | 16.28 | 11.84 | 16.11 |
| 260423 | 'Hist1h3f'   | 0     | 2.66  | 0    | 0    | 0    | 0.79  | 1.91 | 0     | 1.05  | 2.07  |
| 263406 | 'Plekhg3'    | 0.61  | 0.62  | 0    | 0    | 0.46 | 0     | 0    | 0     | 0     | 0     |
| 26356  | 'Ing1'       | 19    | 14.85 | 9.29 | 17.7 | 8.35 | 15.5  | 12.3 | 7.58  | 16.05 | 19.42 |
| 26357  | 'Abcg2'      | 0.02  | 9.64  | 0.69 | 0.03 | 7.56 | 0     | 9.36 | 6.81  | 13.95 | 12.77 |
| 26358  | 'Aldh1a7'    | 0     | 0     | 0    | 0    | 0    | 0.09  | 0    | 0     | 0     | 0     |
| 26360  | 'Angptl2'    | 0     | 0     | 0.01 | 0    | 0.03 | 0     | 0    | 0     | 0     | 0     |
| 26362  | 'Axl'        | 2.77  | 0     | 0.8  | 0.01 | 3.41 | 0.47  | 10.3 | 1.05  | 2.16  | 5.55  |
| 26363  | 'Btd'        | 6.61  | 1.24  | 5.88 | 21.8 | 2.67 | 10.8  | 15.6 | 3.7   | 9.5   | 2.97  |
| 26364  | 'Adgre5'     | 0     | 2.08  | 0    | 0    | 0    | 0     | 0    | 2.26  | 2.73  | 0.01  |

|        |            |       |       |      |      |      |       |      |       |       |        |
|--------|------------|-------|-------|------|------|------|-------|------|-------|-------|--------|
| 26365  | 'Ceacam1'  | 0     | 0     | 0    | 0    | 1.15 | 0     | 0.02 | 0     | 0     | 0      |
| 26366  | 'Ceacam10' | 0     | 0     | 0    | 0    | 0    | 0     | 0    | 6.72  | 0     | 0      |
| 26368  | 'Ceacam9'  | 0     | 0     | 0    | 0    | 0    | 0     | 2.93 | 0.65  | 0     | 0.47   |
| 26370  | 'Cetn2'    | 122.8 | 111.8 | 53.2 | 93.7 | 85.1 | 108.8 | 50.9 | 126.4 | 73.18 | 153.45 |
| 26371  | 'Ciao1'    | 27.27 | 22.08 | 31.3 | 19.7 | 22.2 | 26.57 | 29.3 | 36.23 | 38.54 | 32.73  |
| 26372  | 'Clcn6'    | 9.28  | 11.3  | 9.35 | 4.34 | 9.13 | 9.1   | 12   | 8.72  | 9.02  | 5.43   |
| 26373  | 'Clcn7'    | 16.64 | 20.77 | 23.1 | 19.2 | 25.8 | 19.8  | 20.1 | 30.53 | 20.39 | 30.01  |
| 26374  | 'Cop1'     | 1.38  | 2.6   | 1.4  | 6.24 | 0.91 | 2.65  | 0.2  | 1.56  | 4.53  | 1.49   |
| 263764 | 'Creg2'    | 16.28 | 2.62  | 19.4 | 9.16 | 12   | 3.48  | 12.3 | 3.35  | 20.42 | 4.46   |
| 26377  | 'Dapp1'    | 0     | 0.11  | 0    | 0    | 6.78 | 3.51  | 0    | 0     | 0     | 0      |
| 26378  | 'Decr2'    | 9.07  | 12.38 | 18.1 | 12.5 | 12.3 | 33.58 | 21.5 | 17.15 | 11.05 | 23.6   |
| 26379  | 'Esrra'    | 0.88  | 0.68  | 0.18 | 2.5  | 3.56 | 0.08  | 1.74 | 0.83  | 2.29  | 0.15   |
| 26380  | 'Esrrb'    | 0     | 0     | 0.44 | 0    | 0    | 0.01  | 0    | 0.01  | 0     | 0.99   |
| 26381  | 'Esrrg'    | 0.81  | 0.02  | 4.02 | 2.19 | 1.31 | 0.06  | 0.12 | 0     | 0.35  | 0.37   |
| 26382  | 'Fgd2'     | 0     | 0     | 0.03 | 7.77 | 21.4 | 10.3  | 0    | 0     | 0.13  | 0.37   |
| 26383  | 'Fto'      | 44.3  | 61.08 | 78.1 | 29.8 | 58.4 | 22.28 | 52.1 | 87.51 | 115.2 | 108.82 |
| 26384  | 'Gnpda1'   | 46.66 | 28.08 | 32.3 | 28.1 | 60.6 | 28.21 | 34.8 | 64.14 | 41.55 | 52.34  |
| 26385  | 'Grk6'     | 2.69  | 5.7   | 30   | 2.14 | 8.16 | 7.98  | 4.8  | 11.27 | 19.29 | 7.48   |
| 26386  | 'Hsf4'     | 3.66  | 5.85  | 20.2 | 9.59 | 23.6 | 12.68 | 34.8 | 17.22 | 21.23 | 21.32  |
| 263876 | 'Spata2'   | 3.13  | 11.27 | 16.6 | 22.4 | 2.26 | 0.01  | 9.47 | 3.22  | 6.99  | 5.4    |
| 26390  | 'Mapkbp1'  | 1.18  | 1.92  | 3.7  | 3.67 | 2.63 | 1.42  | 6.95 | 0.23  | 0.65  | 1.49   |
| 26394  | 'Lyp1a2'   | 107.1 | 87.39 | 75.9 | 59.8 | 95.2 | 85.4  | 104  | 100.1 | 136.8 | 117.6  |
| 26395  | 'Map2k1'   | 293.9 | 254   | 202  | 233  | 154  | 158.8 | 284  | 200.8 | 199.2 | 199.63 |
| 26396  | 'Map2k2'   | 48.59 | 42.72 | 65.8 | 23.9 | 22.1 | 37.68 | 48.5 | 20.9  | 47.87 | 13.44  |
| 26397  | 'Map2k3'   | 4.85  | 9.03  | 11.9 | 5.78 | 14.1 | 3.18  | 16.7 | 6.62  | 8.62  | 13.89  |
| 26398  | 'Map2k4'   | 48.61 | 55.09 | 36.6 | 75   | 53.2 | 49.48 | 47   | 63.41 | 75.74 | 56.94  |
| 26399  | 'Map2k6'   | 1.01  | 1.79  | 3.61 | 6.12 | 4.21 | 13.08 | 3.11 | 3.36  | 0     | 7.31   |
| 26400  | 'Map2k7'   | 43.42 | 26.54 | 35.8 | 8.63 | 17.9 | 24.64 | 20.4 | 25.98 | 52.27 | 23.1   |
| 26401  | 'Map3k1'   | 1.9   | 2.27  | 2.33 | 2.01 | 1.29 | 2.22  | 3.19 | 3.86  | 3.57  | 6.89   |
| 26403  | 'Map3k11'  | 4.03  | 4.42  | 6.69 | 0.02 | 0    | 3.93  | 1.71 | 4.22  | 1.48  | 0.2    |
| 26404  | 'Map3k12'  | 34.19 | 18.36 | 42.1 | 16.7 | 35   | 11.82 | 29   | 20.75 | 19.59 | 24.19  |
| 26405  | 'Map3k2'   | 0.61  | 0.56  | 0.81 | 2.79 | 0.61 | 0.56  | 0.72 | 0.25  | 1.54  | 0.52   |
| 26406  | 'Map3k3'   | 2.28  | 2.41  | 2.98 | 0.64 | 3.85 | 4.62  | 0.56 | 1.37  | 8.3   | 1.13   |
| 264064 | 'Cdk8'     | 3.05  | 1.79  | 9.58 | 12.8 | 6.97 | 1.95  | 0.52 | 6.08  | 1.73  | 2.73   |
| 26407  | 'Map3k4'   | 8     | 6.59  | 4.74 | 6.66 | 4.87 | 4.84  | 9.09 | 6.43  | 7.16  | 9.36   |
| 26408  | 'Map3k5'   | 2.26  | 5.28  | 3.39 | 4.73 | 2.61 | 2.39  | 1.16 | 2.27  | 3.87  | 3.25   |
| 26409  | 'Map3k7'   | 0.2   | 1.25  | 0.76 | 1.4  | 0.82 | 1.15  | 0.39 | 0.74  | 0     | 2.13   |
| 26410  | 'Map3k8'   | 0     | 0.66  | 0.58 | 6.13 | 0.03 | 1.81  | 4.86 | 0     | 0     | 0.91   |
| 26411  | 'Map4k1'   | 2.75  | 1.6   | 0    | 5.41 | 2.46 | 0     | 0.05 | 0     | 8.64  | 0.02   |
| 26412  | 'Map4k2'   | 10.24 | 14.41 | 20.2 | 6.03 | 15.1 | 7.37  | 10.6 | 13.48 | 12.92 | 9.12   |
| 26413  | 'Mapk1'    | 53.11 | 52.94 | 58   | 125  | 55.8 | 79.79 | 63.8 | 60.83 | 61.19 | 41     |
| 264134 | 'Ttc26'    | 0.74  | 0.07  | 0.58 | 8.18 | 0.08 | 2.61  | 3.38 | 0.06  | 2.62  | 1.56   |
| 26414  | 'Mapk10'   | 71.65 | 92.91 | 84.1 | 59.3 | 72.3 | 128   | 115  | 62.57 | 85.18 | 91.06  |
| 26416  | 'Mapk14'   | 5.32  | 2.2   | 12.1 | 3.52 | 5.79 | 1.37  | 0.02 | 1.26  | 9     | 4.19   |
| 26417  | 'Mapk3'    | 24.99 | 25.36 | 14.5 | 41.3 | 50   | 26.48 | 29.1 | 22.39 | 13.1  | 28.82  |
| 26419  | 'Mapk8'    | 1.81  | 6.48  | 3.92 | 6.78 | 5.59 | 2.48  | 13.9 | 3.29  | 2.47  | 4.5    |
| 26420  | 'Mapk9'    | 19.99 | 14.03 | 21   | 17.6 | 14   | 4.74  | 17.7 | 19.35 | 21.41 | 12.1   |
| 26422  | 'Nbea'     | 6.96  | 2.94  | 3.36 | 3.68 | 2.52 | 5.01  | 3.99 | 3.05  | 5.73  | 2.88   |
| 26424  | 'Nr5a2'    | 0     | 0.18  | 0.01 | 0    | 0    | 0     | 0    | 0.03  | 0     | 0.02   |
| 26425  | 'Nubp1'    | 1.35  | 0.23  | 5.67 | 6.67 | 2.78 | 1.11  | 0    | 2.98  | 11.12 | 2.07   |
| 26426  | 'Nubp2'    | 40.82 | 42.2  | 29.4 | 84.8 | 37.5 | 36.72 | 16.2 | 36.99 | 64.96 | 47.3   |
| 26427  | 'Creb3l1'  | 1.32  | 0     | 0    | 19.4 | 3.16 | 0     | 0    | 1.18  | 0.04  | 0.13   |
| 26428  | 'Orc4'     | 43.17 | 36.83 | 35.1 | 45.1 | 29.2 | 37.27 | 32.3 | 31.11 | 37.15 | 44.61  |
| 26429  | 'Orc5'     | 26.04 | 16.98 | 43.8 | 31   | 22.2 | 40.14 | 37.9 | 26.92 | 37.28 | 40.58  |
| 26430  | 'Parg'     | 4.77  | 2.37  | 4.78 | 0    | 3.25 | 3.25  | 0    | 4.31  | 4.36  | 0.36   |
| 26431  | 'Git2'     | 7.09  | 9.97  | 10   | 7.82 | 4.71 | 7.87  | 5.58 | 2.65  | 2.72  | 1.86   |
| 26432  | 'Plod2'    | 0.32  | 0     | 0.25 | 0.17 | 0.52 | 2.49  | 0    | 0.68  | 0     | 0.05   |
| 26433  | 'Plod3'    | 12.33 | 9.57  | 5.25 | 16.5 | 22.4 | 2.14  | 6.07 | 8.2   | 0.16  | 4.24   |

|        |            |       |       |      |      |      |       |      |       |       |         |
|--------|------------|-------|-------|------|------|------|-------|------|-------|-------|---------|
| 26434  | 'Prnd'     | 0     | 0     | 0    | 3.58 | 0    | 0     | 3.72 | 0     | 0.87  | 0       |
| 26436  | 'Psg16'    | 23.25 | 12.46 | 8.49 | 19.3 | 10.6 | 8.56  | 20.1 | 13.3  | 7.11  | 13.1    |
| 26440  | 'Psm1'     | 218.8 | 256.4 | 229  | 195  | 180  | 298   | 229  | 231.9 | 161.4 | 249.72  |
| 26441  | 'Psm4'     | 130.7 | 69.7  | 78.5 | 149  | 98.4 | 153.8 | 108  | 160.8 | 134   | 133.12  |
| 26442  | 'Psm5'     | 272.8 | 166.4 | 242  | 323  | 236  | 243.8 | 181  | 268.9 | 222   | 220.46  |
| 26443  | 'Psm6'     | 244.5 | 287.1 | 292  | 380  | 192  | 290.4 | 250  | 286.3 | 272.4 | 268.62  |
| 26444  | 'Psm7'     | 228.7 | 282.8 | 369  | 344  | 362  | 435   | 297  | 443.8 | 373.3 | 364.11  |
| 26445  | 'Psm2'     | 385.3 | 320.1 | 367  | 471  | 421  | 451.8 | 339  | 512.2 | 390.3 | 386.75  |
| 26446  | 'Psm3'     | 348.9 | 307   | 454  | 685  | 442  | 485.2 | 380  | 483.5 | 210.3 | 386.01  |
| 26447  | 'Poli'     | 8.19  | 7.22  | 5.6  | 0.32 | 10.9 | 2.91  | 7.66 | 7.19  | 8.48  | 11.33   |
| 26448  | 'Mok'      | 3.39  | 16.34 | 6.74 | 0.46 | 18.5 | 30.55 | 1.92 | 18.35 | 8.7   | 20.34   |
| 26450  | 'Rbbp9'    | 21.82 | 49.42 | 20   | 12.8 | 25.6 | 19.78 | 21.7 | 25.08 | 13.38 | 25.83   |
| 26451  | 'Rpl27a'   | 89.13 | 102   | 98.3 | 85.8 | 92.5 | 87.43 | 96.4 | 52.84 | 66.04 | 57.18   |
| 26456  | 'Sema4g'   | 6.82  | 0.47  | 5.89 | 1.57 | 4.74 | 8.24  | 3.15 | 3.88  | 5.42  | 1.83    |
| 26457  | 'Slc27a1'  | 23.05 | 24.47 | 23.5 | 22.3 | 21   | 12.92 | 12.3 | 25.37 | 10.67 | 15.76   |
| 26458  | 'Slc27a2'  | 26.26 | 6.12  | 19.6 | 0    | 8.64 | 4.47  | 16.9 | 8.96  | 14.32 | 8.45    |
| 26459  | 'Slc27a5'  | 0     | 0     | 0    | 0    | 0.88 | 0     | 0    | 0.14  | 0     | 0       |
| 26462  | 'Txnrd2'   | 13.79 | 18    | 25.8 | 1.52 | 22.9 | 24.46 | 25.1 | 15.58 | 29.51 | 26.51   |
| 26465  | 'Zfp146'   | 4.29  | 9.47  | 0.07 | 3.82 | 16   | 14.43 | 0.02 | 11.13 | 8.65  | 4.15    |
| 26466  | 'Zfp260'   | 15.95 | 12.5  | 12.1 | 9.78 | 15   | 9.36  | 26.2 | 19.24 | 25.28 | 21.23   |
| 264895 | 'Acsf2'    | 0.06  | 0.08  | 0.04 | 0    | 0    | 0     | 0    | 0.03  | 0.25  | 0       |
| 26549  | 'Itgb1bp2' | 0.1   | 0.53  | 0.19 | 0    | 0    | 0.07  | 0.12 | 0     | 0.03  | 0.07    |
| 26554  | 'Cul3'     | 9.61  | 8.3   | 5.76 | 14.9 | 12.3 | 7.14  | 4.98 | 5.15  | 1.91  | 9.23    |
| 26556  | 'Homer1'   | 1.45  | 2.74  | 1.99 | 6.01 | 2.15 | 0.63  | 1.68 | 1.7   | 5.99  | 2.16    |
| 26557  | 'Homer2'   | 0.51  | 0.06  | 0.8  | 1.13 | 0.42 | 0.25  | 0.09 | 0.53  | 1.09  | 1.95    |
| 26558  | 'Homer3'   | 0.93  | 0     | 1.01 | 6.22 | 0    | 0.58  | 0    | 0     | 0.02  | 0       |
| 26559  | 'Hunk'     | 0     | 4.01  | 4.4  | 0    | 1.31 | 3.06  | 1.5  | 6.54  | 3.9   | 1.71    |
| 26561  | 'Mmp23'    | 1.15  | 6.9   | 1.43 | 0    | 0.46 | 6.41  | 3.87 | 2.6   | 11.67 | 0.08    |
| 26562  | 'Ncdn'     | 171.3 | 127.3 | 195  | 37.1 | 194  | 119.5 | 298  | 223.6 | 141.6 | 105.24  |
| 26563  | 'Ror1'     | 0     | 0     | 0    | 0    | 0.39 | 0     | 0    | 0     | 0     | 0       |
| 26564  | 'Ror2'     | 0     | 0     | 0    | 0    | 0    | 0     | 0    | 0     | 0.01  | 0       |
| 26565  | 'Pla2g10'  | 0     | 0     | 0    | 3.41 | 0    | 0     | 0    | 0     | 0     | 0       |
| 26568  | 'Slc27a3'  | 0.35  | 0     | 2.71 | 0    | 2.61 | 4.3   | 5.95 | 6.4   | 9.73  | 11.5    |
| 26569  | 'Slc27a4'  | 9.24  | 6.53  | 11.3 | 9.27 | 8.95 | 8.37  | 3.49 | 4.52  | 18.58 | 6.26    |
| 26570  | 'Slc7a11'  | 0.34  | 0.01  | 0.13 | 0    | 0    | 0.03  | 2.24 | 0.03  | 0.01  | 0.92    |
| 26572  | 'Cops3'    | 137.1 | 107.8 | 132  | 99   | 141  | 204.4 | 119  | 167.7 | 123.1 | 177.03  |
| 26611  | 'Rcn2'     | 378.2 | 322   | 246  | 414  | 273  | 547.7 | 270  | 324.1 | 410.6 | 421.77  |
| 266614 | 'Ly6g5b'   | 0     | 0     | 0    | 0    | 0    | 0     | 0    | 0     | 1.39  | 0       |
| 266632 | 'Irak4'    | 69.3  | 20.5  | 50.3 | 0    | 12.5 | 399.5 | 0    | 301.1 | 222.6 | 195.02  |
| 266645 | 'Acmsd'    | 0.21  | 0.11  | 0.23 | 0.34 | 0.27 | 0.13  | 0.16 | 0.07  | 0.19  | 0.06    |
| 266690 | 'Cyb5r4'   | 2     | 2.53  | 8.52 | 2.55 | 0.73 | 3.2   | 7.47 | 4.41  | 11.87 | 0       |
| 266692 | 'Cpne1'    | 21.83 | 12.61 | 16.2 | 8.64 | 18.4 | 20.92 | 21   | 18.33 | 26.15 | 16.82   |
| 266781 | 'Snx17'    | 109.7 | 112.4 | 106  | 110  | 94.8 | 152.7 | 126  | 106.7 | 83.05 | 140.27  |
| 267019 | 'Rps15a'   | 10.32 | 12.06 | 16.2 | 16.2 | 10.3 | 6.48  | 16.3 | 11.64 | 7.18  | 8.14    |
| 26754  | 'Cops5'    | 70.33 | 43.94 | 89.8 | 73.6 | 102  | 82.14 | 76.4 | 78.71 | 39.29 | 66.11   |
| 26757  | 'Dpysl4'   | 9.59  | 17.8  | 24.5 | 24.5 | 18.8 | 5.14  | 31.2 | 30.74 | 21.45 | 16.46   |
| 268281 | 'Shprh'    | 2.38  | 7.73  | 1.77 | 5.89 | 5.91 | 0.89  | 2.25 | 2.62  | 3.95  | 1.03    |
| 268288 | 'Samd3'    | 8.9   | 3.2   | 10.4 | 0    | 5.24 | 87.08 | 3.24 | 4.25  | 56.66 | 81.98   |
| 268291 | 'Rnf217'   | 0     | 0     | 0    | 0.39 | 0    | 0     | 0.68 | 0.85  | 0.3   | 0.53    |
| 268294 | 'Zbtb24'   | 12.31 | 12.83 | 8.61 | 6.05 | 7.46 | 7.24  | 6.59 | 7.98  | 14.12 | 7.14    |
| 268297 | 'Scml4'    | 16.13 | 4.03  | 2.28 | 4.21 | 1.45 | 0.36  | 5.84 | 5.06  | 4.35  | 4.18    |
| 268301 | 'Sowahc'   | 3.86  | 1.86  | 8.36 | 3.52 | 0.86 | 8.47  | 1.44 | 3.02  | 1.25  | 2.12    |
| 268345 | 'Kcnc2'    | 7.18  | 10.93 | 5.14 | 4.23 | 4.3  | 8.93  | 7.37 | 2.62  | 7.89  | 7.4     |
| 268354 | 'Fam19a2'  | 11.33 | 4.71  | 17.6 | 0.02 | 7.29 | 7.24  | 14.3 | 8.62  | 10.43 | 10.66   |
| 268373 | 'Ppia'     | 4144  | 3845  | 3653 | 3215 | 3743 | 4789  | 4447 | 4678  | 3177  | 4043.98 |
| 268379 | 'Abca13'   | 0     | 0     | 0    | 0    | 0    | 0     | 1.23 | 0     | 0     | 0       |
| 268390 | 'Ahsa2'    | 52.61 | 29.03 | 8.96 | 14.2 | 22.9 | 11.65 | 26.2 | 38.03 | 12.94 | 24.67   |
| 268395 | 'Mpg'      | 27.51 | 21.96 | 27.5 | 19.1 | 22.8 | 35.89 | 41.3 | 41.47 | 38.36 | 25.12   |

|        |                 |       |       |      |      |      |       |      |       |       |        |
|--------|-----------------|-------|-------|------|------|------|-------|------|-------|-------|--------|
| 268396 | 'Sh3pxd2b'      | 0.27  | 0.45  | 0.1  | 0    | 0.33 | 0     | 0.86 | 0.64  | 0.01  | 0      |
| 268417 | 'Zkscan17'      | 0.98  | 0.09  | 2.33 | 0.01 | 0.08 | 1.78  | 0.26 | 0.53  | 0.25  | 0.03   |
| 268420 | 'Alkbh5'        | 16.52 | 17.39 | 15.8 | 19.9 | 11.8 | 5.44  | 9.53 | 10.53 | 13.68 | 17.34  |
| 268445 | 'Ankrd13b'      | 3.51  | 5.72  | 1.36 | 29   | 2.2  | 0.95  | 3.11 | 1.69  | 3.14  | 0.03   |
| 268448 | 'Phf12'         | 4.65  | 2.92  | 2.02 | 10.9 | 8.24 | 0.44  | 2.04 | 1.47  | 2.81  | 3.36   |
| 268449 | 'Rpl23a'        | 147.7 | 236.9 | 251  | 335  | 202  | 353.5 | 320  | 191.2 | 226   | 202.98 |
| 268451 | 'Rab11fip4'     | 13.02 | 10.93 | 7.61 | 10.4 | 8.59 | 5.72  | 7.24 | 4.85  | 8.35  | 4.84   |
| 268465 | 'Eme1'          | 0     | 0     | 0    | 0    | 0    | 0     | 0.6  | 0.03  | 0     | 0      |
| 268469 | 'Zfp652'        | 0.33  | 3.94  | 0.02 | 0.53 | 0    | 0     | 0    | 0     | 0     | 0.25   |
| 268470 | 'Ube2z'         | 16.96 | 4.91  | 10.9 | 2.96 | 10.3 | 6.69  | 2.4  | 8.62  | 4.29  | 6.82   |
| 268480 | 'Rapgef11'      | 4.39  | 1.81  | 2.37 | 0.02 | 5.43 | 0.51  | 2.66 | 3.56  | 5.9   | 1.08   |
| 268481 | 'Krt222'        | 8.6   | 9.89  | 15.1 | 18.1 | 10.4 | 4.53  | 10.2 | 17.25 | 4.67  | 19.28  |
| 268482 | 'Krt12'         | 0     | 2.47  | 0    | 0    | 0    | 0     | 4.16 | 1.61  | 0     | 0      |
| 268490 | 'Lsm12'         | 13.33 | 15.34 | 10.8 | 28.7 | 19.2 | 10.8  | 18.4 | 20.66 | 22.87 | 12.56  |
| 268491 | 'Meioc'         | 0.13  | 0     | 0    | 0    | 0.06 | 0     | 0    | 0     | 0     | 0      |
| 268510 | 'Mgat5b'        | 1.38  | 0     | 2.95 | 0.02 | 0.73 | 0     | 10.4 | 1.77  | 4.19  | 4.25   |
| 268512 | 'Slc26a11'      | 0.04  | 15.33 | 0.02 | 0    | 7.47 | 36.27 | 4.67 | 13.28 | 44.5  | 14.82  |
| 268515 | 'Bahcc1'        | 0.33  | 1.13  | 0.76 | 0.01 | 0    | 0.26  | 0    | 0.15  | 1.28  | 0.92   |
| 268527 | 'Greb1'         | 1.83  | 2.8   | 0    | 2.48 | 0.02 | 0     | 0    | 0.54  | 0     | 0      |
| 268534 | 'Sntg2'         | 3.08  | 3.44  | 2.93 | 0    | 0.03 | 7.17  | 4.63 | 9.11  | 9.75  | 11.76  |
| 268564 | 'Zbtb1'         | 3.05  | 3.39  | 2.22 | 0    | 0.01 | 0.34  | 0    | 1.99  | 2.34  | 0      |
| 268566 | 'Gphn'          | 26.24 | 29.22 | 43.7 | 57.8 | 34.1 | 22.4  | 20.7 | 24.88 | 33.6  | 19.76  |
| 268567 | 'Tmem229b'      | 10.9  | 0.23  | 0.01 | 0    | 9.13 | 0.66  | 8.78 | 0.81  | 0.08  | 2.19   |
| 268595 | 'D430019H16Rik' | 4.36  | 5.07  | 5.09 | 3.77 | 6.27 | 2.86  | 11.5 | 4.75  | 5.19  | 7.1    |
| 268656 | 'Sptlc1'        | 11.03 | 7.86  | 15.9 | 10.6 | 10.2 | 6.16  | 12.5 | 1.41  | 18.22 | 9.97   |
| 268663 | 'Cdhr2'         | 2.14  | 6.79  | 5.81 | 1.6  | 0    | 4.93  | 0.01 | 3.73  | 9.19  | 2.06   |
| 268670 | 'Zfp759'        | 0.56  | 0.01  | 2.4  | 4.49 | 0    | 0.31  | 0    | 0     | 2.36  | 0.21   |
| 268697 | 'Ccnb1'         | 0     | 0     | 1.97 | 0.02 | 0    | 0     | 0    | 0     | 0     | 3.21   |
| 268706 | 'Slc38a9'       | 2.18  | 2.34  | 0.21 | 2.3  | 0.34 | 4.4   | 2.95 | 6.48  | 2.98  | 2.95   |
| 268709 | 'Fam107a'       | 5.43  | 3.02  | 0.86 | 9.53 | 0.03 | 0.1   | 0    | 9.56  | 0     | 0.01   |
| 268721 | 'Zswim8'        | 6.99  | 7.63  | 2.48 | 11.2 | 7.29 | 5.67  | 4.69 | 5.31  | 6.32  | 3.4    |
| 268729 | 'Frmfd2'        | 0     | 0     | 0.21 | 0    | 0    | 0     | 0    | 0     | 0     | 0      |
| 268739 | 'Arhgef40'      | 1.47  | 6.31  | 7.93 | 11.6 | 5.93 | 4.89  | 0.43 | 2.3   | 4.22  | 11.19  |
| 26874  | 'Abcd2'         | 2.57  | 2.65  | 0.27 | 0.04 | 0.03 | 0.73  | 0.06 | 1.72  | 2.57  | 3.93   |
| 268741 | 'Tox4'          | 15.3  | 20.16 | 11.9 | 0.95 | 8.14 | 14.45 | 16.9 | 13.14 | 12.8  | 11.01  |
| 268747 | 'Carmil3'       | 2.08  | 2.83  | 2.17 | 6.82 | 4.75 | 2.2   | 3.54 | 0.38  | 6.67  | 7.97   |
| 268749 | 'Rnf31'         | 3.61  | 6.32  | 14.1 | 12.1 | 2.59 | 11.54 | 8.14 | 0.95  | 1.16  | 11.37  |
| 26875  | 'Pclo'          | 5.36  | 2.98  | 5.47 | 4.8  | 3.13 | 2.9   | 7.23 | 4.04  | 3.79  | 2.95   |
| 268752 | 'Wdfy2'         | 0.92  | 1.83  | 2.17 | 2.4  | 4.05 | 1.03  | 0.9  | 1.76  | 1.95  | 2.69   |
| 268756 | 'Gulo'          | 0     | 0     | 0.43 | 0    | 0    | 0     | 0    | 0     | 0     | 0      |
| 268759 | '9930012K11Rik' | 3.76  | 9.22  | 2.75 | 0    | 0.02 | 0     | 0    | 0     | 4.33  | 0      |
| 26877  | 'B3galt1'       | 29.44 | 8.24  | 12.4 | 13.6 | 2.95 | 0.02  | 1.24 | 10.87 | 1.8   | 1.74   |
| 26878  | 'B3galt2'       | 8.85  | 7.54  | 1.84 | 2.3  | 0.37 | 2.87  | 6.78 | 2.4   | 2.85  | 1.63   |
| 268780 | 'Egflam'        | 0     | 0     | 0.01 | 0    | 0    | 0     | 0    | 0.12  | 1.83  | 0      |
| 268782 | 'Agxt2'         | 0     | 0.11  | 0    | 0    | 0    | 0     | 0    | 0     | 0     | 0      |
| 268783 | 'Mtmr12'        | 4.62  | 0.61  | 2.71 | 8.09 | 0.01 | 0     | 3.59 | 1.52  | 3.71  | 0.22   |
| 26879  | 'B3galnt1'      | 116.5 | 76.05 | 106  | 88.3 | 55.8 | 49.89 | 111  | 102.5 | 153.4 | 81.57  |
| 268807 | 'Klhl38'        | 0     | 0     | 0    | 0    | 0    | 0     | 0    | 0.02  | 0     | 0.02   |
| 268822 | 'Adck5'         | 16.34 | 21.13 | 13.8 | 0.76 | 21.6 | 14.33 | 10.9 | 15.52 | 8.33  | 20.48  |
| 26885  | 'Casp8ap2'      | 0.09  | 1.83  | 1.8  | 7.45 | 0.52 | 0.25  | 1.83 | 0.92  | 2.6   | 0.99   |
| 268857 | 'Nlrc3'         | 3     | 3.11  | 1.74 | 2.07 | 2.22 | 2.61  | 1.03 | 2.15  | 3.48  | 0.97   |
| 268859 | 'Rbfox1'        | 52.54 | 70.11 | 75.2 | 69.8 | 57.2 | 75.22 | 103  | 68.36 | 44.31 | 37.1   |
| 26886  | 'Cenph'         | 0     | 1.03  | 1.61 | 0    | 3.09 | 0     | 0    | 0     | 0     | 0      |
| 268860 | 'Abat'          | 101.1 | 74.61 | 100  | 71.4 | 60.8 | 34.75 | 69.7 | 101.9 | 40.25 | 57.55  |
| 268878 | 'Atp13a5'       | 1.6   | 0     | 0    | 0    | 0    | 2.09  | 0.51 | 2.18  | 0     | 0.2    |
| 26888  | 'Clec4a2'       | 0.85  | 0.75  | 1.21 | 1.53 | 1.65 | 2.5   | 1.29 | 0.4   | 0.82  | 0.98   |
| 268880 | 'Xxy1t1'        | 4.36  | 3.98  | 0.61 | 0    | 0.14 | 0     | 6.8  | 1.55  | 6.05  | 1.58   |
| 268882 | 'Fbxo45'        | 1.84  | 2.66  | 1.6  | 2.42 | 2.84 | 2.63  | 2.6  | 0.26  | 0.9   | 0.41   |

|        |                 |       |       |      |      |      |       |      |       |       |        |
|--------|-----------------|-------|-------|------|------|------|-------|------|-------|-------|--------|
| 26889  | 'Cln8'          | 9.4   | 6.7   | 14.8 | 0.83 | 1.45 | 14.27 | 9.71 | 14.43 | 13.02 | 7.75   |
| 268890 | 'Lsamp'         | 70.68 | 99.38 | 64.2 | 89.5 | 45.1 | 85.69 | 62.2 | 48.46 | 66.23 | 60.96  |
| 268902 | 'Robo2'         | 3.82  | 0.33  | 0.01 | 0.01 | 0.72 | 0.4   | 5.1  | 2.46  | 0.66  | 0.95   |
| 268903 | 'Nrip1'         | 3.56  | 4.38  | 6.54 | 4.35 | 1.34 | 0.59  | 0.24 | 4.48  | 2.72  | 1.17   |
| 26891  | 'Cops4'         | 187.5 | 164   | 121  | 180  | 157  | 196   | 125  | 183.8 | 175.7 | 183.01 |
| 26893  | 'Cops6'         | 286.8 | 235.5 | 278  | 287  | 351  | 380.4 | 298  | 430.6 | 339.7 | 317.88 |
| 268930 | 'Pkmyt1'        | 1.54  | 1.64  | 5.02 | 0    | 7.86 | 0     | 0    | 4.66  | 17.05 | 1.48   |
| 268932 | 'Caskin1'       | 4.2   | 4.42  | 12.4 | 8.88 | 9.9  | 8.44  | 2.98 | 7.91  | 2.25  | 3.69   |
| 268933 | 'Wdr24'         | 19.58 | 7.81  | 7.11 | 2.22 | 3.54 | 1.86  | 6.73 | 8.03  | 3.28  | 5.95   |
| 268934 | 'Grm4'          | 1.61  | 1.38  | 0    | 0    | 0.12 | 0.01  | 0.03 | 0.03  | 0.61  | 2.21   |
| 268935 | 'Scube3'        | 1.31  | 0.86  | 0.01 | 0.02 | 0.48 | 0.02  | 0.01 | 0.08  | 0     | 0      |
| 268936 | 'Brpf3'         | 0     | 0.09  | 0.39 | 2.83 | 0.03 | 1.52  | 3.95 | 1.31  | 0.04  | 0.99   |
| 26894  | 'Cops7a'        | 186.8 | 183.5 | 146  | 153  | 87.7 | 169.6 | 153  | 193.5 | 93.69 | 162.6  |
| 268949 | 'Mucl3'         | 0     | 0     | 0    | 0    | 0    | 0.16  | 0    | 0     | 0     | 0      |
| 26895  | 'Cops7b'        | 22.6  | 9.27  | 14.3 | 0    | 31.5 | 0.06  | 15.4 | 22.45 | 22.62 | 15.43  |
| 268958 | 'Capn11'        | 0     | 0.96  | 0    | 1.19 | 0    | 0     | 0    | 0     | 1.03  | 2.79   |
| 26896  | 'Med14'         | 2.97  | 1.52  | 2    | 5.09 | 5.64 | 0.99  | 0.3  | 3.06  | 6.28  | 1.03   |
| 26897  | 'Acot1'         | 2.71  | 20.25 | 2.49 | 8.55 | 13.7 | 11.13 | 0    | 14    | 16.98 | 7.18   |
| 268977 | 'Ltbp1'         | 0     | 0.23  | 0    | 0.93 | 0.73 | 0.37  | 0    | 0     | 0     | 1.26   |
| 268980 | 'Strn'          | 4.59  | 1.76  | 1.9  | 2.75 | 0.8  | 1.29  | 0.08 | 1.2   | 2.23  | 1.46   |
| 268996 | 'Ss18'          | 2.1   | 4.78  | 9.25 | 3.46 | 5.13 | 2.89  | 17   | 2.32  | 9.97  | 12.67  |
| 26900  | 'Ddx3y'         | 32.48 | 29.77 | 0.05 | 0.01 | 21.1 | 9.08  | 21   | 25.91 | 24.53 | 25.14  |
| 269003 | 'Sap130'        | 6.42  | 16.62 | 21.7 | 7.8  | 16.2 | 6.91  | 23.3 | 15.16 | 24.3  | 14.23  |
| 26901  | 'Ss18l2'        | 94.91 | 151   | 141  | 130  | 128  | 136.5 | 110  | 89.08 | 62.58 | 120.57 |
| 269019 | 'Stk32a'        | 13.2  | 8     | 10.9 | 21.5 | 1.97 | 2.74  | 0.04 | 15.17 | 11.51 | 6.71   |
| 269023 | 'Zfp608'        | 2.43  | 3.01  | 0.37 | 2.35 | 2.52 | 2.02  | 1.56 | 2.33  | 3.93  | 4.27   |
| 26903  | 'Dysf'          | 0     | 0.23  | 0.04 | 0.01 | 0.19 | 0.91  | 0    | 0     | 0.36  | 0.74   |
| 269033 | '4930503L19Rik' | 4.76  | 1.48  | 3.82 | 0    | 3.01 | 0     | 20   | 3.8   | 5.38  | 1.88   |
| 269037 | 'Ctif'          | 1.91  | 4.25  | 1.3  | 3.17 | 3.33 | 2.94  | 2.68 | 3     | 0.7   | 0.66   |
| 26904  | 'Sh2d1b1'       | 0     | 0.41  | 0    | 0    | 0    | 0     | 0    | 0     | 0     | 0      |
| 26905  | 'Eif2s3x'       | 19.47 | 22.91 | 45.3 | 23.7 | 13.4 | 6.82  | 24.9 | 20.18 | 23.48 | 27.07  |
| 269053 | 'Gpr152'        | 0     | 0     | 0    | 0    | 0    | 0     | 0    | 0     | 0     | 1.08   |
| 269060 | 'Dagla'         | 0.91  | 0.93  | 4.18 | 0.08 | 2.84 | 3.02  | 2.34 | 0.28  | 1.38  | 0.78   |
| 269061 | 'Cpsf7'         | 9.56  | 14.37 | 19.5 | 17.4 | 12.1 | 4.76  | 18.8 | 10.65 | 26.73 | 19.45  |
| 26908  | 'Eif2s3y'       | 20.79 | 15.41 | 0.07 | 1.56 | 27   | 28    | 31.7 | 27.13 | 36.35 | 42.74  |
| 269109 | 'Dpp10'         | 11.31 | 10.99 | 8.66 | 7.85 | 26.7 | 15.94 | 15.1 | 18.65 | 14.69 | 19.01  |
| 269113 | 'Nup54'         | 6.55  | 9.79  | 4.89 | 14.3 | 2.65 | 13.61 | 7.26 | 7.4   | 9.47  | 12.64  |
| 269116 | 'Nfasc'         | 21.4  | 15.73 | 22.3 | 24.2 | 11.3 | 9.98  | 19.9 | 9.55  | 12.52 | 16.25  |
| 26912  | 'Gcat'          | 8.41  | 4.54  | 7.49 | 7.37 | 7.86 | 14.23 | 16.5 | 3.84  | 23.05 | 7.34   |
| 269120 | 'Optc'          | 0.12  | 1.7   | 2.86 | 0    | 21   | 38.01 | 6.96 | 6.18  | 4.29  | 7.08   |
| 26913  | 'Gprin1'        | 3.04  | 7.23  | 1.56 | 5.01 | 3.54 | 0.08  | 2.05 | 5.45  | 2     | 2.28   |
| 269132 | 'Colgalt2'      | 0     | 0.08  | 0.88 | 0    | 0    | 0     | 0    | 0.02  | 2.77  | 0.19   |
| 26914  | 'H2afy'         | 39.81 | 44.58 | 43.2 | 50   | 45.4 | 41.2  | 49   | 51.56 | 53.87 | 31.81  |
| 269152 | 'Kif26b'        | 0.12  | 0.01  | 1.79 | 0.02 | 0.42 | 1.35  | 1.75 | 0.26  | 0     | 0.08   |
| 26918  | 'Ern2'          | 3.6   | 0     | 0.37 | 0    | 0.02 | 0.02  | 0.73 | 6.64  | 2.91  | 0.11   |
| 269180 | 'Inpp4a'        | 99.19 | 100   | 61.4 | 112  | 124  | 93.95 | 54.6 | 116   | 141.5 | 114.36 |
| 269181 | 'Mgat4a'        | 3.09  | 6.57  | 3.97 | 2.04 | 3.18 | 6.95  | 5.08 | 3.51  | 3.12  | 3.19   |
| 26919  | 'Zfp346'        | 0.58  | 3.57  | 0.03 | 0    | 11.2 | 9.15  | 16.8 | 1.48  | 1.07  | 0.05   |
| 269198 | 'Nbeal1'        | 1.52  | 1.56  | 1.89 | 0    | 1.96 | 0.29  | 1.33 | 0.61  | 1.41  | 1.96   |
| 26920  | 'Cntrl'         | 3.34  | 2.69  | 0.77 | 4.28 | 8.56 | 1.34  | 1.29 | 0.36  | 2.67  | 2.46   |
| 269209 | 'Stk36'         | 0.11  | 2.61  | 1.3  | 1.25 | 0.71 | 0.08  | 0    | 0     | 0     | 2.55   |
| 26921  | 'Map4k4'        | 1.31  | 2.49  | 0.31 | 0.78 | 0.93 | 0.13  | 0.81 | 0.1   | 0.25  | 1.43   |
| 26922  | 'Mecr'          | 16.32 | 22.6  | 9.32 | 19.7 | 21.9 | 16.52 | 2.26 | 28.75 | 21.49 | 29.79  |
| 269224 | 'Pask'          | 0.01  | 0.4   | 1.04 | 0.16 | 0    | 0     | 0    | 0     | 0     | 0.54   |
| 269233 | 'Fam171a1'      | 2.54  | 13.45 | 7.51 | 2.23 | 4.26 | 8.27  | 10.2 | 4.82  | 2.77  | 13.1   |
| 269252 | 'Gtf3c4'        | 1.26  | 0.95  | 0.77 | 3.96 | 2.25 | 0.72  | 0.15 | 1.1   | 1.24  | 1.05   |
| 269254 | 'Setx'          | 2.64  | 1.18  | 2.98 | 5.68 | 2.63 | 0.58  | 1.5  | 3.12  | 2.46  | 3.99   |
| 26926  | 'Aifm1'         | 16.52 | 14.91 | 7.41 | 0    | 11.2 | 16.09 | 10.8 | 18.08 | 15.03 | 7.85   |



|        |              |       |       |      |      |      |       |      |       |       |        |
|--------|--------------|-------|-------|------|------|------|-------|------|-------|-------|--------|
| 269261 | 'Rpl12'      | 202.2 | 155.8 | 141  | 250  | 151  | 162.8 | 137  | 166.9 | 108.7 | 184.89 |
| 269275 | 'Acvr1c'     | 0.65  | 0.66  | 0    | 0.35 | 0    | 0     | 0.1  | 0.55  | 0.01  | 0.12   |
| 26931  | 'Ppp2r5c'    | 33.03 | 29.77 | 34.7 | 79.1 | 45.9 | 49.19 | 48.2 | 41.87 | 32.65 | 43.97  |
| 26932  | 'Ppp2r5e'    | 5.98  | 5.62  | 6.89 | 13.7 | 5.27 | 1.06  | 3.82 | 3.28  | 3.59  | 2.36   |
| 269336 | 'Ccadc32'    | 89.51 | 61.44 | 64.5 | 38.1 | 64.1 | 104.2 | 76.5 | 82.94 | 66.42 | 99.13  |
| 269338 | 'Vps39'      | 23.27 | 21.77 | 34.1 | 42.7 | 26   | 19.93 | 13.8 | 24.38 | 34.32 | 38.87  |
| 26934  | 'Racgap1'    | 4.18  | 10.43 | 11.5 | 12.5 | 4.54 | 0     | 11.1 | 1.83  | 6.39  | 3.81   |
| 269344 | 'Eil3'       | 1.91  | 3.24  | 3.07 | 6.42 | 3.32 | 2.2   | 0.72 | 1.81  | 2.97  | 4.03   |
| 269346 | 'Slc28a2'    | 0.02  | 0     | 0.17 | 0    | 0    | 0     | 0.02 | 0     | 0     | 0      |
| 269356 | 'Slc4a11'    | 0.02  | 2.23  | 0    | 0    | 0.02 | 0     | 0    | 1.33  | 0     | 0      |
| 26936  | 'Mpripl'     | 5.01  | 7.18  | 6.22 | 9.52 | 6.3  | 6.05  | 6.92 | 9.92  | 7.64  | 6.46   |
| 269378 | 'Ahcy'       | 22.09 | 47.66 | 35.3 | 35.1 | 30.4 | 16.96 | 44   | 37.94 | 30.17 | 28.4   |
| 26938  | 'St6galnac5' | 21.05 | 8.64  | 17.2 | 0    | 18.7 | 13.95 | 7.57 | 19.85 | 7.95  | 2.3    |
| 269389 | 'Tox2'       | 52.22 | 41.66 | 86.8 | 25.2 | 48.1 | 25.37 | 94.3 | 56.34 | 56.51 | 38.07  |
| 26939  | 'Polr3e'     | 14.07 | 15.56 | 18.8 | 16.5 | 17.6 | 11.11 | 16.8 | 16.75 | 10.18 | 6.7    |
| 269397 | 'Ss18l1'     | 11.25 | 7.56  | 13.6 | 3.51 | 13.2 | 4.13  | 6.46 | 13.81 | 12.89 | 6.69   |
| 26940  | 'Ecsit'      | 16.7  | 46.14 | 49   | 71.2 | 53.2 | 61.41 | 63.5 | 40.95 | 50.39 | 39.73  |
| 269400 | 'Rtel1'      | 3.31  | 6.66  | 8.48 | 4.52 | 5.98 | 4.45  | 9.7  | 2.58  | 3.36  | 4.55   |
| 269401 | 'Zfp512b'    | 9.73  | 13.68 | 14   | 20.1 | 11.4 | 8.91  | 12.9 | 9.84  | 7.42  | 7.54   |
| 26941  | 'Slc9a3r1'   | 1.82  | 9.38  | 7.98 | 4.4  | 8.84 | 9.7   | 25.9 | 5.33  | 5.48  | 2.45   |
| 26942  | 'Spag1'      | 1.55  | 1.65  | 7.01 | 2.09 | 3.18 | 2.46  | 5.25 | 1.77  | 4.24  | 1.03   |
| 269423 | 'Abhd18'     | 4.66  | 3.7   | 3.38 | 3.46 | 8.3  | 5.07  | 6.65 | 4.23  | 2.77  | 1.15   |
| 269424 | 'Jade1'      | 6.89  | 2.23  | 4.26 | 12.2 | 1.71 | 0.37  | 3.51 | 3.34  | 2.26  | 2.47   |
| 26943  | 'Serinc3'    | 66.15 | 41.54 | 57.9 | 42.6 | 45.3 | 19.99 | 40.4 | 35.69 | 41.89 | 53.52  |
| 269437 | 'Plch1'      | 1.42  | 0.35  | 3.81 | 0    | 1.98 | 0.44  | 1.12 | 0.23  | 0     | 0      |
| 26944  | 'Tinag'      | 0     | 0     | 0    | 0    | 0    | 0     | 0    | 0     | 0     | 0.33   |
| 26945  | 'Tpsg1'      | 0     | 0     | 0.05 | 0.15 | 0    | 0     | 0    | 0     | 0.04  | 0      |
| 26946  | 'Trpc7'      | 11.71 | 7.84  | 5.48 | 8.87 | 14.1 | 22.1  | 16.1 | 15.74 | 11.74 | 15.77  |
| 269470 | 'Wdr3'       | 10.76 | 10.56 | 2.57 | 1.39 | 4.13 | 4.4   | 12.5 | 8.78  | 10.24 | 5.36   |
| 269473 | 'Lrig2'      | 7.84  | 2.34  | 8.41 | 11.5 | 6.42 | 3.2   | 6.63 | 6.32  | 3.24  | 4.25   |
| 26949  | 'Vat1'       | 39.31 | 33.29 | 25.6 | 26.6 | 38.7 | 23.19 | 29   | 37    | 56.88 | 54.51  |
| 26950  | 'Vsn11'      | 271.8 | 270.2 | 269  | 101  | 316  | 396.7 | 266  | 420.2 | 593.6 | 455.84 |
| 26951  | 'Zw10'       | 10.57 | 7.37  | 9.62 | 9.93 | 3.74 | 13.48 | 11.4 | 9.15  | 8.88  | 10.32  |
| 269513 | 'Nkain3'     | 1.72  | 8.93  | 5.75 | 4.43 | 1.93 | 0.65  | 3.18 | 3.93  | 0.1   | 5.55   |
| 269514 | 'Fbxl4'      | 12.17 | 19.74 | 16.5 | 16.5 | 4.92 | 21.97 | 3.03 | 26.53 | 28.39 | 31.05  |
| 269523 | 'Vcp'        | 182.4 | 192.8 | 157  | 142  | 154  | 198.1 | 192  | 160.6 | 174   | 258.84 |
| 269529 | 'Fbxo10'     | 16.96 | 17.36 | 37.2 | 18   | 6.97 | 7.99  | 22   | 20.96 | 18.46 | 22.66  |
| 269536 | 'Tex10'      | 25.54 | 14.55 | 24.5 | 5.47 | 7.33 | 12.62 | 4.89 | 16.94 | 26.89 | 15.21  |
| 269582 | 'Clspn'      | 1.12  | 0     | 0.02 | 0.04 | 0    | 0     | 0    | 0.01  | 0.04  | 0      |
| 269585 | 'Zscan20'    | 1.41  | 0.09  | 0.1  | 0.05 | 0.65 | 1.16  | 0.02 | 0.54  | 0.19  | 1.37   |
| 269587 | 'Epb41'      | 3     | 1.88  | 2.97 | 6.46 | 2.21 | 2.6   | 1.56 | 1.59  | 0.6   | 3.96   |
| 269589 | 'Syt11'      | 0     | 0.05  | 0    | 0.65 | 0    | 0     | 0    | 0     | 0     | 0      |
| 269593 | 'Luzp1'      | 2.75  | 4.68  | 6.71 | 8.55 | 8.97 | 3.56  | 9.43 | 4.82  | 6.87  | 3.57   |
| 269604 | 'Gpr157'     | 0.4   | 0.39  | 0.56 | 0.87 | 0.68 | 0.76  | 0.95 | 0.67  | 2.26  | 0.99   |
| 269608 | 'Plekhhg5'   | 9.49  | 6.69  | 8.28 | 7.22 | 1.02 | 0.03  | 8.72 | 7.86  | 7.96  | 6.59   |
| 26961  | 'Rpl8'       | 165.8 | 212.5 | 250  | 173  | 170  | 298   | 199  | 151.6 | 137.8 | 234.88 |
| 269610 | 'Chd5'       | 1.97  | 3.98  | 6    | 2.47 | 5.15 | 6.13  | 4.94 | 3.83  | 4.92  | 5.2    |
| 269614 | 'Pank4'      | 31.55 | 36.19 | 20.2 | 21.8 | 32.4 | 17.63 | 84   | 36.86 | 33.46 | 44.44  |
| 269615 | 'Plch2'      | 0.33  | 0     | 4.45 | 1.35 | 1.49 | 5.71  | 1.8  | 4.18  | 0     | 2.62   |
| 269623 | 'Rbm48'      | 7.4   | 2.57  | 8.7  | 16.2 | 10.9 | 4.62  | 5.23 | 10.29 | 10.53 | 10.05  |
| 269629 | 'Lhfp13'     | 5.91  | 23.44 | 37.9 | 10.2 | 11.9 | 4.14  | 17.6 | 19.12 | 15.33 | 11.47  |
| 269633 | 'Wdr86'      | 1.77  | 0.06  | 0.03 | 1.83 | 0.09 | 0     | 0.34 | 0.55  | 0.01  | 0.01   |
| 269639 | 'Zfp512'     | 23.64 | 42.63 | 60.4 | 40.1 | 42.3 | 48.39 | 28   | 45.74 | 64.48 | 43.46  |
| 269642 | 'Nat8l'      | 7.08  | 6.32  | 5.44 | 8.7  | 16.2 | 2.7   | 15.4 | 3.18  | 1.3   | 0.76   |
| 269643 | 'Ppp2r2c'    | 9.48  | 13.77 | 13.4 | 11.5 | 21   | 8.48  | 21.3 | 12.73 | 12.59 | 10.54  |
| 26965  | 'Cul1'       | 33.15 | 45.48 | 56.2 | 45.4 | 35   | 44.66 | 62.1 | 30.02 | 42.05 | 49.09  |
| 26968  | 'Islr'       | 0     | 0     | 0    | 0.03 | 10.3 | 0     | 15.9 | 0     | 0     | 0.02   |
| 269682 | 'Golga3'     | 2.8   | 8.02  | 4.02 | 7.71 | 5.99 | 0.29  | 4.92 | 10.18 | 10.47 | 1.18   |

|        |            |       |       |      |      |      |       |      |       |       |        |
|--------|------------|-------|-------|------|------|------|-------|------|-------|-------|--------|
| 269693 | 'Ccadc60'  | 0     | 0.2   | 0    | 0    | 2.32 | 0     | 0    | 1     | 0     | 0.39   |
| 269695 | 'Rnft2'    | 6.1   | 7.55  | 6.38 | 6.64 | 6.22 | 2.11  | 3.72 | 1.17  | 2.55  | 6.11   |
| 269700 | 'Hectd4'   | 4.09  | 5.24  | 8.72 | 5.64 | 4.98 | 3.64  | 9.15 | 5.61  | 5.17  | 6.46   |
| 269701 | 'Wdr66'    | 0.07  | 2.93  | 0.36 | 2.42 | 1.35 | 0.3   | 0    | 0.3   | 0     | 1.09   |
| 269702 | 'Mphosph9' | 2.74  | 7.3   | 2.4  | 1.82 | 6.74 | 5.91  | 5.26 | 4.85  | 4.58  | 2.43   |
| 269704 | 'Zfp664'   | 16.32 | 8.4   | 12.6 | 5.44 | 6.35 | 3.19  | 11.8 | 12.55 | 12.67 | 0.87   |
| 269713 | 'Clip2'    | 0.48  | 1.25  | 1.11 | 1.11 | 1.34 | 0.16  | 0.22 | 0.51  | 1.55  | 1.39   |
| 269717 | 'Orai2'    | 6.75  | 6.37  | 22.3 | 0.9  | 10.8 | 1.31  | 10.7 | 8.52  | 5.58  | 5.39   |
| 26972  | 'Spo11'    | 0     | 0     | 0    | 0    | 0    | 0     | 0    | 0     | 0     | 0.85   |
| 269774 | 'Aak1'     | 3.17  | 8.75  | 5.47 | 7    | 6.33 | 2.63  | 7.5  | 6.56  | 3.38  | 7      |
| 269784 | 'Cntn4'    | 8.34  | 0.68  | 8.32 | 11   | 13.3 | 14.11 | 11.7 | 6.8   | 19.27 | 15.39  |
| 269788 | 'Lhfp14'   | 12.86 | 12.27 | 15.9 | 6.11 | 11.3 | 8.04  | 15   | 10.54 | 11.69 | 6.77   |
| 269800 | 'Zfp384'   | 5.74  | 2.56  | 6.54 | 2.63 | 5.4  | 3.93  | 2.04 | 0.48  | 2.46  | 2.11   |
| 269823 | 'Pon3'     | 0.02  | 0     | 0.03 | 0    | 0    | 0     | 0    | 0     | 0.08  | 0.02   |
| 269831 | 'Tspan12'  | 9.18  | 13.18 | 16   | 4.68 | 9.91 | 28.43 | 10.8 | 14.76 | 26.32 | 11.69  |
| 269854 | 'Nat14'    | 147.4 | 132.7 | 109  | 114  | 142  | 197   | 99.9 | 181   | 117   | 178.64 |
| 269855 | 'Ssc5d'    | 0.06  | 0     | 0    | 0    | 0    | 0     | 0    | 0     | 0.17  | 0.6    |
| 26987  | 'Eif4e2'   | 13.58 | 14.88 | 11   | 31.7 | 21.1 | 5.61  | 12.2 | 16.16 | 8.3   | 16.66  |
| 269870 | 'Zfp446'   | 5.25  | 6.46  | 6.16 | 2.86 | 4.98 | 1.38  | 2.14 | 6.08  | 4.2   | 4.56   |
| 269878 | 'Megf8'    | 3.21  | 5.57  | 12.8 | 0.03 | 10.8 | 6.72  | 8.31 | 2.68  | 5.09  | 6.06   |
| 269881 | 'Map3k10'  | 0.51  | 0.41  | 2.99 | 1.65 | 4.06 | 0.97  | 1.08 | 0.82  | 0.92  | 1.48   |
| 269902 | 'Vmn2r57'  | 0     | 0     | 0    | 0    | 0    | 0     | 0.04 | 0     | 0     | 0.05   |
| 26992  | 'Brd7'     | 13.34 | 14.38 | 12.5 | 2.09 | 8.64 | 10.41 | 6.48 | 6.53  | 10.16 | 14.59  |
| 269941 | 'Chsy1'    | 1.33  | 2.4   | 2    | 7.46 | 0.66 | 1.3   | 0.44 | 2.37  | 0.5   | 0      |
| 269951 | 'Idh2'     | 69.57 | 66.15 | 68.2 | 70.9 | 96.1 | 109.9 | 87.8 | 71.82 | 63.59 | 70.26  |
| 269952 | 'Gdpgp1'   | 0.92  | 2.8   | 1.93 | 0.11 | 5.01 | 7.58  | 2.72 | 0.74  | 1.95  | 0.24   |
| 269954 | 'Till13'   | 0.07  | 0.45  | 0.2  | 0    | 0    | 0     | 0    | 0     | 0.78  | 1.24   |
| 269955 | 'Rccd1'    | 2.48  | 1.7   | 2.1  | 1.8  | 3.7  | 0.58  | 2.35 | 4.99  | 4.91  | 1      |
| 269959 | 'Adamts13' | 0     | 0     | 0    | 0    | 0.1  | 0     | 0    | 0.49  | 0     | 0      |
| 269966 | 'Nup98'    | 7.82  | 2.54  | 6.73 | 17.7 | 5.18 | 5.15  | 2.82 | 2.67  | 5.8   | 7.67   |
| 269994 | 'Gsg11'    | 2.81  | 1.76  | 0    | 6.16 | 3.43 | 4.59  | 4.74 | 1.82  | 0     | 0      |
| 269997 | 'Zfp747'   | 0     | 1.91  | 0    | 1.61 | 3.59 | 5.26  | 0    | 2.73  | 7.67  | 9.1    |
| 269999 | 'Orai3'    | 15.19 | 16.45 | 10.6 | 0    | 6.99 | 1.32  | 5.06 | 10.99 | 5.04  | 5.58   |
| 270028 | 'Fam155a'  | 24.22 | 26.78 | 31.2 | 47.3 | 50.7 | 40.54 | 30   | 25.99 | 38.14 | 23.83  |
| 270035 | 'Letm2'    | 7.86  | 10.35 | 5.38 | 17.5 | 10.6 | 19.89 | 6.32 | 7.91  | 8.83  | 15.64  |
| 270049 | 'Galnt16'  | 8.11  | 1.76  | 0.05 | 10.1 | 9.59 | 4.44  | 4.16 | 6.13  | 1.47  | 5.18   |
| 270058 | 'Map1s'    | 19.39 | 26.87 | 25.2 | 6.19 | 19.4 | 25.88 | 39.3 | 36.34 | 20.05 | 49.2   |
| 270066 | 'Slc35e1'  | 0.64  | 1.31  | 0.91 | 0.11 | 2.35 | 0.01  | 1.9  | 0.36  | 0.02  | 1.53   |
| 270076 | 'Gcdh'     | 28.32 | 27.28 | 34.1 | 33.6 | 23.2 | 7.74  | 11.8 | 28.85 | 34.63 | 31.12  |
| 27008  | 'Micall1'  | 1.07  | 1.87  | 5.01 | 0.34 | 0.94 | 6.23  | 0.05 | 0.32  | 6.47  | 0.52   |
| 270084 | 'Lpcat2'   | 1.2   | 2.92  | 9.58 | 4.51 | 5.51 | 30.16 | 4.17 | 7.52  | 2.04  | 6.96   |
| 270086 | 'Ogfod1'   | 18.4  | 14.4  | 25.4 | 11   | 18.2 | 17.75 | 26.7 | 14.73 | 34.05 | 14.99  |
| 270096 | 'Mon1b'    | 3.4   | 3.6   | 6.49 | 8.7  | 6.75 | 1.89  | 5.65 | 4.71  | 7.55  | 2.39   |
| 270097 | 'Vat11'    | 218.6 | 218.8 | 62.6 | 16.5 | 109  | 95.95 | 221  | 207.7 | 204.1 | 185.63 |
| 270106 | 'Rpl13'    | 435.6 | 510.4 | 591  | 694  | 426  | 470.7 | 562  | 371   | 281.4 | 392.96 |
| 270109 | 'Pcnx2'    | 0.08  | 1.38  | 1.67 | 2.88 | 3.44 | 1.31  | 6.47 | 0.52  | 0.09  | 0.11   |
| 270110 | 'Irf2bp2'  | 3.13  | 4.43  | 3.87 | 4.58 | 3.29 | 2.08  | 3.61 | 0.94  | 2.86  | 1.97   |
| 270118 | 'Maml2'    | 1.61  | 1.89  | 1.35 | 10.7 | 4.95 | 4.12  | 0.14 | 3.24  | 2.12  | 1.52   |
| 270120 | 'Fat3'     | 1.71  | 0.32  | 1.74 | 2.53 | 1.48 | 0.34  | 1.25 | 0.52  | 0     | 0.68   |
| 27015  | 'Polk'     | 1.74  | 0.93  | 2.48 | 1.66 | 2.26 | 0.45  | 1.42 | 3.35  | 1.73  | 1.82   |
| 270150 | 'Ccadc153' | 5.33  | 0     | 0    | 0    | 6.75 | 5.31  | 0    | 14.51 | 0     | 6.84   |
| 270151 | 'Nlrx1'    | 2.97  | 0.49  | 0.29 | 3.46 | 0.56 | 0     | 0    | 0     | 0     | 0.43   |
| 270156 | 'Nkapd1'   | 2.6   | 3.02  | 1.3  | 8.73 | 0.68 | 0     | 1.95 | 2.38  | 1.48  | 4.4    |
| 270160 | 'Rab39'    | 1.75  | 0     | 0    | 0    | 0.28 | 0.32  | 0    | 0.21  | 0     | 2.33   |
| 270162 | 'Elmod1'   | 5.43  | 9.28  | 7.75 | 5.04 | 24.2 | 17.94 | 10.6 | 10.19 | 16.02 | 14.09  |
| 270163 | 'Myo9a'    | 6.98  | 5.55  | 4.06 | 7.43 | 2.98 | 2.56  | 8.64 | 4.61  | 3.21  | 2.67   |
| 270166 | 'Clpx'     | 18.84 | 16.1  | 18   | 0.6  | 17.1 | 18.18 | 17.5 | 21.85 | 25.63 | 20.31  |
| 270190 | 'Ephb1'    | 3.59  | 0.32  | 3.16 | 1.67 | 1.62 | 1.97  | 6.02 | 4.43  | 7.32  | 1.62   |



|        |             |       |       |      |      |      |       |      |       |       |        |
|--------|-------------|-------|-------|------|------|------|-------|------|-------|-------|--------|
| 271981 | 'Tbck'      | 18.47 | 18.02 | 13.2 | 19.9 | 17.1 | 19.4  | 15.7 | 19.72 | 21.66 | 11.51  |
| 272009 | 'Srsf12'    | 23.22 | 16.59 | 18.3 | 12.7 | 21.8 | 5.69  | 8.3  | 14.35 | 22.33 | 20.55  |
| 272027 | 'Tstd2'     | 2.72  | 6.22  | 8.64 | 8.44 | 4.11 | 3.1   | 6.73 | 5.33  | 3.28  | 5.25   |
| 272031 | 'Plppr1'    | 13.63 | 8.4   | 6.11 | 1.64 | 9.69 | 24.84 | 11.3 | 10.86 | 4.86  | 4.07   |
| 27204  | 'Syn3'      | 2.66  | 6.65  | 7.24 | 9.9  | 8.49 | 6.56  | 22   | 7.28  | 6.74  | 6.28   |
| 27205  | 'Podxl'     | 1.14  | 0.71  | 1.1  | 0    | 0.15 | 0.01  | 3.6  | 0.87  | 0     | 0      |
| 27207  | 'Rps11'     | 478.5 | 323.2 | 447  | 423  | 387  | 443.4 | 478  | 305.7 | 440.3 | 431.48 |
| 27214  | 'Dbf4'      | 0     | 0.2   | 1.12 | 0    | 0    | 0     | 0    | 0     | 0.12  | 0      |
| 27215  | 'Azi2'      | 28.62 | 29.87 | 23.5 | 14.1 | 17   | 20.91 | 29.9 | 34.09 | 24.22 | 26.82  |
| 272158 | 'Poln'      | 0     | 0.03  | 0    | 0.04 | 0    | 0.02  | 0.14 | 0.08  | 0.03  | 0.01   |
| 27217  | 'Mixl1'     | 0     | 0     | 0    | 0.02 | 0    | 0     | 0    | 0     | 0     | 0      |
| 27218  | 'Slamf1'    | 0     | 1.78  | 0    | 0    | 0    | 0     | 0    | 0     | 0     | 2.95   |
| 27219  | 'Sgk2'      | 1.4   | 2.04  | 0    | 0    | 0    | 0     | 0    | 0     | 0     | 0      |
| 27220  | 'Cartpt'    | 341.4 | 616.6 | 449  | 260  | 153  | 26.1  | 8.57 | 28.84 | 331.5 | 74.49  |
| 27221  | 'Chaf1a'    | 0     | 2.11  | 0.49 | 2.09 | 2.02 | 0     | 0    | 1.88  | 0.01  | 3.52   |
| 27222  | 'Atp1a4'    | 0     | 0     | 0    | 0    | 0    | 0     | 0    | 0     | 0     | 0.22   |
| 27223  | 'Trp53bp1'  | 17.06 | 11.34 | 20.7 | 16.4 | 9.7  | 9.76  | 15.3 | 12.21 | 19.26 | 29.42  |
| 27224  | 'Eloa'      | 10.92 | 11.19 | 4.75 | 9.58 | 6.32 | 4.59  | 6.36 | 9.59  | 2.71  | 11.44  |
| 27225  | 'Ddx24'     | 158.8 | 158.9 | 143  | 120  | 139  | 142.9 | 155  | 138.8 | 121.4 | 139.04 |
| 27226  | 'Pla2g7'    | 42.22 | 46.31 | 23.3 | 74.1 | 17   | 34.47 | 44.1 | 28.37 | 63.11 | 44.58  |
| 272322 | 'Arntl2'    | 1.35  | 12.23 | 7.71 | 0.07 | 1.11 | 2.05  | 4.18 | 8.44  | 0.64  | 2.19   |
| 272347 | 'Zfp398'    | 3.74  | 5.73  | 5.05 | 1.27 | 2.84 | 6.19  | 2.57 | 8.2   | 5.02  | 7.13   |
| 272359 | 'Irf2bp1'   | 12.37 | 2.16  | 6.58 | 4.19 | 5.55 | 9.17  | 7.46 | 5.41  | 5.82  | 8.54   |
| 272381 | 'Lrrc4b'    | 3.81  | 2.48  | 1.09 | 4.35 | 5.22 | 3.64  | 3.26 | 1.97  | 2.82  | 3.27   |
| 272382 | 'Spib'      | 0.03  | 0     | 0.37 | 0.04 | 0    | 0     | 0    | 0.01  | 0     | 0      |
| 272396 | 'Tarsl2'    | 2.19  | 3.11  | 3.81 | 3.24 | 4.09 | 3.34  | 4.03 | 3.75  | 0     | 2.77   |
| 272411 | 'B3gnt6'    | 0     | 0     | 6.03 | 0    | 0    | 0     | 0    | 4.05  | 0     | 0      |
| 272465 | 'Tmem255b'  | 0     | 0     | 8.43 | 18.4 | 0    | 0     | 2.3  | 2.35  | 0     | 0      |
| 272538 | 'Tango6'    | 1.92  | 0.31  | 1.87 | 0    | 0.1  | 0     | 2.62 | 1.03  | 0.02  | 0      |
| 272551 | 'Gins2'     | 0     | 2.87  | 3.5  | 0    | 0    | 0     | 4.28 | 0     | 2.49  | 3.96   |
| 272589 | 'Tbcel'     | 3.17  | 0.82  | 2.38 | 0.23 | 1.85 | 2.37  | 1.37 | 1.75  | 0.13  | 1.5    |
| 27260  | 'Plek2'     | 6.26  | 4.86  | 2.98 | 10.7 | 0.03 | 11.3  | 5.16 | 4.93  | 0.73  | 0      |
| 27261  | 'Dok3'      | 0.29  | 0     | 4.28 | 18.1 | 5.15 | 0     | 1.81 | 1.5   | 0.08  | 0.67   |
| 27263  | 'Smok2a'    | 0     | 0     | 0.72 | 3.15 | 0.53 | 0     | 0    | 0     | 0     | 0      |
| 272636 | 'Esyt3'     | 12.48 | 10.69 | 6.79 | 7.64 | 28.4 | 0.2   | 1.46 | 3.56  | 21.83 | 9.25   |
| 272643 | 'Prss43'    | 0     | 0     | 0    | 0    | 0    | 0     | 0    | 0     | 0.09  | 0      |
| 27267  | 'Cars'      | 26.2  | 27.69 | 35.2 | 42.9 | 38.7 | 48.73 | 22   | 31.65 | 22.41 | 40.98  |
| 27273  | 'Pdk4'      | 0.63  | 1.17  | 0.11 | 0    | 0    | 2.49  | 1.06 | 0     | 0.65  | 0.41   |
| 27274  | 'Zfp354b'   | 0.54  | 3.15  | 0    | 0    | 8.4  | 0.6   | 0    | 1.43  | 2.98  | 3.21   |
| 27275  | 'Nufip1'    | 8.64  | 15.1  | 10.7 | 14   | 7.78 | 4.89  | 22.3 | 7.91  | 11.67 | 9.68   |
| 27276  | 'Plekhb1'   | 59.63 | 119.6 | 114  | 125  | 780  | 136.8 | 86.3 | 127.2 | 88.67 | 69.31  |
| 27277  | 'Golga5'    | 12.11 | 20.77 | 6.83 | 17.1 | 10.2 | 11.42 | 12.9 | 8.1   | 10.24 | 14.26  |
| 27278  | 'Clnk'      | 0     | 0     | 0    | 0    | 0    | 0     | 0    | 0.08  | 0     | 0      |
| 27279  | 'Tnfrsf12a' | 3.33  | 9.66  | 20.6 | 0    | 4.29 | 35.83 | 13.7 | 8.52  | 6.17  | 20.35  |
| 272790 | 'Magee2'    | 41.85 | 36.36 | 29.5 | 6.67 | 5.32 | 9.17  | 33.4 | 16.06 | 20.17 | 24.66  |
| 27280  | 'Phlda3'    | 28.32 | 8.9   | 22.6 | 42.9 | 23.9 | 24.21 | 46   | 23.65 | 32.24 | 12.15  |
| 27281  | 'Hrasls'    | 28.46 | 14.63 | 24.5 | 34.5 | 18.5 | 37.68 | 45.2 | 34    | 34.48 | 31.55  |
| 27354  | 'Nbn'       | 4.67  | 5.18  | 13.7 | 5.98 | 10.3 | 1.42  | 6.76 | 9.83  | 19.51 | 8.4    |
| 27355  | 'Pald1'     | 1.9   | 0.8   | 4.3  | 0    | 0    | 0     | 0    | 0.33  | 0.65  | 0.02   |
| 27356  | 'Insl6'     | 4.91  | 5.7   | 0    | 0    | 6.31 | 1.88  | 7.57 | 0     | 0     | 0      |
| 27357  | 'Gyg'       | 29.25 | 30.78 | 35   | 5.09 | 20.7 | 26.03 | 17.7 | 34.98 | 50.46 | 23.13  |
| 27359  | 'Sytl4'     | 2.7   | 12.72 | 4.73 | 12.8 | 0.03 | 0.02  | 5.77 | 2.38  | 0.01  | 14.16  |
| 27360  | 'Add3'      | 10.44 | 24.86 | 7.67 | 9.27 | 11.2 | 8.35  | 13.5 | 13.71 | 2.71  | 12.06  |
| 27361  | 'Msrb1'     | 5.01  | 4.02  | 6.07 | 6.96 | 5.45 | 11.66 | 9.39 | 7.16  | 10.13 | 5.56   |
| 27362  | 'Dnajb9'    | 76.93 | 84.8  | 47.4 | 59   | 70.8 | 66.82 | 29.2 | 39.79 | 76.44 | 47.31  |
| 27364  | 'Srr'       | 18.77 | 19.09 | 9.51 | 20.4 | 23   | 12.22 | 10.7 | 21.3  | 10.39 | 21.4   |
| 27366  | 'Txnl4a'    | 354.6 | 302.5 | 388  | 427  | 423  | 415.1 | 241  | 358.6 | 456.8 | 360.83 |
| 27367  | 'Rpl3'      | 313.3 | 378.8 | 426  | 517  | 323  | 327.8 | 399  | 316.2 | 232.5 | 190.61 |



|        |            |       |       |      |      |      |       |      |       |       |        |
|--------|------------|-------|-------|------|------|------|-------|------|-------|-------|--------|
| 277345 | 'Wfdc16'   | 0     | 0.09  | 0    | 0    | 0    | 0     | 0    | 0     | 0     | 0      |
| 277360 | 'Prex1'    | 1.55  | 0.49  | 3.81 | 11   | 2.31 | 0.01  | 0.85 | 1.04  | 0.92  | 0.01   |
| 277396 | 'Klhl23'   | 7.41  | 8.96  | 14.8 | 8.42 | 7.39 | 2.41  | 3.08 | 7.72  | 13.11 | 5.53   |
| 277414 | 'Trp53i11' | 50.31 | 85.75 | 41.5 | 51.7 | 129  | 32.91 | 10.9 | 56.55 | 51.95 | 25.77  |
| 277432 | 'Vstm2l'   | 0.59  | 0.22  | 0.25 | 1.7  | 0.96 | 0.58  | 0.56 | 0.21  | 0.13  | 0.13   |
| 277463 | 'Gpr107'   | 14.46 | 4.65  | 19   | 0.78 | 4.97 | 1.28  | 9.45 | 14.68 | 18.07 | 8.03   |
| 277468 | 'Slc39a12' | 10.12 | 16.83 | 4.73 | 4.48 | 0.69 | 19.1  | 7.41 | 9.36  | 2.73  | 4.51   |
| 27756  | 'Lsm2'     | 41.55 | 25.31 | 30.3 | 16.3 | 19.2 | 35.08 | 3.45 | 17.84 | 44.82 | 24.44  |
| 27762  | 'Vwa7'     | 0     | 0     | 0.46 | 0    | 0    | 0.35  | 0    | 0     | 0     | 0      |
| 277743 | 'Fam131c'  | 0.86  | 0.37  | 5.98 | 3.8  | 1.3  | 0.13  | 0    | 0.11  | 0.03  | 0.5    |
| 277773 | 'Fam205c'  | 0     | 0     | 0    | 6.43 | 1.12 | 0     | 0    | 0.76  | 0     | 0      |
| 27784  | 'Commd8'   | 28.38 | 30.96 | 26.1 | 36.8 | 30.5 | 14.97 | 32.5 | 27.2  | 28.7  | 34.94  |
| 277854 | 'Depdc5'   | 2.92  | 2.81  | 5.2  | 0.1  | 1.85 | 1.47  | 7.87 | 1.78  | 4.23  | 1.52   |
| 277939 | 'C2cd3'    | 1.35  | 1.91  | 3.71 | 0    | 2.95 | 1.45  | 0.01 | 1.35  | 0.48  | 1.56   |
| 277973 | 'Slc9a5'   | 3.1   | 1.32  | 14.4 | 0.02 | 2.25 | 4.93  | 0.46 | 8.21  | 10.78 | 9.19   |
| 277978 | 'Exoc3l'   | 0.05  | 0.18  | 1.01 | 0    | 0.14 | 7.87  | 0    | 0.17  | 0.61  | 3.61   |
| 27801  | 'Zdhhc8'   | 3.63  | 5.04  | 6.49 | 2.18 | 7.44 | 0.28  | 0.36 | 2.8   | 1.93  | 4.38   |
| 278097 | 'Armcx6'   | 25.72 | 8.73  | 25.7 | 15.8 | 11.7 | 11.68 | 74.8 | 4.75  | 41.1  | 20.44  |
| 278174 | 'Ssxb3'    | 0     | 0     | 0    | 0    | 0    | 0     | 0    | 0     | 0     | 0.11   |
| 278240 | 'Spin2c'   | 17.31 | 14.47 | 20.8 | 7    | 29.3 | 21.33 | 33.1 | 30.29 | 36.38 | 22.06  |
| 278279 | 'Tmtc2'    | 6.5   | 0.33  | 0.12 | 0.67 | 1.23 | 0.55  | 0.27 | 0.06  | 0.85  | 2.52   |
| 278304 | 'Zfp385c'  | 0.04  | 0.07  | 0.12 | 0.09 | 0.05 | 0.36  | 0.06 | 0.03  | 0.04  | 0.02   |
| 278507 | 'Wfikkn2'  | 0     | 0     | 0    | 0    | 0    | 0.01  | 0    | 0     | 0.01  | 0      |
| 278672 | 'Duxbl1'   | 0.62  | 0.89  | 0.2  | 4.38 | 0.05 | 1.8   | 0    | 0     | 0     | 1.12   |
| 278679 | 'Apol7b'   | 0.1   | 0.02  | 0    | 0.03 | 0.02 | 0     | 0.09 | 0     | 0     | 0.01   |
| 27878  | 'Tada1'    | 34.7  | 36.05 | 39.7 | 17.1 | 36.4 | 20.58 | 30.6 | 53.01 | 29.25 | 33.45  |
| 278795 | 'Lrrc10b'  | 1.27  | 0.37  | 3.27 | 3.6  | 0    | 0     | 0    | 0.54  | 3.39  | 4.68   |
| 27883  | 'Tango2'   | 104.4 | 113.6 | 173  | 126  | 175  | 273.4 | 250  | 249.1 | 247.8 | 178.71 |
| 27886  | 'Ess2'     | 10.86 | 22.23 | 23.4 | 23.3 | 29   | 4.88  | 3.99 | 32.14 | 10.91 | 39.21  |
| 279028 | 'Adamts13' | 0.92  | 1.3   | 0.63 | 2.48 | 0.9  | 0.85  | 1.17 | 0.71  | 1.62  | 0.91   |
| 279029 | 'Stkld1'   | 0     | 0     | 0    | 0    | 0    | 0.84  | 0    | 1.22  | 0     | 0      |
| 279185 | 'Gm13083'  | 0     | 0     | 0    | 0    | 0    | 0     | 0    | 0.03  | 0.03  | 0      |
| 279499 | 'Kctd19'   | 0     | 0     | 0    | 0    | 0    | 0     | 0    | 0     | 0     | 0.01   |
| 279561 | 'Wnk3'     | 1.46  | 0.96  | 1.1  | 2.59 | 2.64 | 1.53  | 3.62 | 2.02  | 1.99  | 2.39   |
| 279572 | 'Tlr13'    | 0     | 0     | 0.01 | 4.26 | 0    | 0.19  | 0    | 0     | 0     | 0      |
| 279618 | 'Gm715'    | 0     | 0     | 0.45 | 0    | 0    | 0     | 0    | 1.19  | 0     | 0.36   |
| 27965  | 'Spg21'    | 39.4  | 56.69 | 45.4 | 44.7 | 45.9 | 65.23 | 59.8 | 43.29 | 63.01 | 48.63  |
| 279653 | 'Pcdh19'   | 2.02  | 4.09  | 7.18 | 8.88 | 4.44 | 0.87  | 3.14 | 2.52  | 9.39  | 4.48   |
| 27966  | 'Rrp9'     | 34.55 | 26.83 | 16.8 | 49.7 | 29.6 | 22.85 | 39.3 | 38.4  | 51.57 | 40.63  |
| 27967  | 'Cherp'    | 10.91 | 14.5  | 30.6 | 6.82 | 13.5 | 5.46  | 15.1 | 15.94 | 9.48  | 9.87   |
| 279706 | 'Nup62cl'  | 0     | 0     | 0    | 21.4 | 0    | 0     | 0    | 0     | 0     | 31.05  |
| 27973  | 'Vkorc1'   | 47.84 | 105.8 | 58.2 | 64.3 | 38.3 | 70.03 | 35.7 | 31.38 | 67.3  | 104.52 |
| 279766 | 'Rhbdd3'   | 32.22 | 35.78 | 27.2 | 22.2 | 21.8 | 52.97 | 41.5 | 27.88 | 23.28 | 26.13  |
| 27979  | 'Eif3b'    | 5.97  | 8.43  | 3.82 | 8.2  | 13.6 | 6.18  | 13.4 | 2.42  | 16.15 | 6.58   |
| 27981  | 'Rsrp1'    | 179   | 196.6 | 173  | 217  | 365  | 227.4 | 157  | 299.2 | 207.1 | 236.87 |
| 27984  | 'Efhd2'    | 19.27 | 19.88 | 8.21 | 31.5 | 16.4 | 35.4  | 32.2 | 14.2  | 73.66 | 20.55  |
| 27993  | 'Imp4'     | 14.32 | 40.35 | 17.5 | 56   | 26.3 | 41.04 | 30.3 | 16.34 | 30.11 | 16.06  |
| 27998  | 'Exosc5'   | 20.17 | 21.28 | 28.3 | 4.24 | 47.3 | 68.7  | 21.7 | 24.57 | 22.68 | 20.8   |
| 27999  | 'Fam3c'    | 16.4  | 21.14 | 18.3 | 19.8 | 18   | 9.42  | 11.9 | 7.17  | 23.29 | 6.77   |
| 28000  | 'Prpf19'   | 6.47  | 8.14  | 11.2 | 9.54 | 7.36 | 10.7  | 12   | 10.23 | 13.41 | 10.12  |
| 28006  | 'Washc2'   | 7.2   | 15.28 | 23.8 | 20.7 | 6.84 | 3.11  | 17.4 | 11.41 | 20.74 | 13.76  |
| 28010  | 'Miip'     | 8.21  | 3.47  | 14.1 | 0    | 11.6 | 8.55  | 0.19 | 1.58  | 17.14 | 8.01   |
| 28015  | 'Polr2m'   | 126.9 | 105.4 | 144  | 158  | 89.6 | 86.09 | 198  | 63    | 166.3 | 55.41  |
| 28018  | 'Ubfd1'    | 8.8   | 3     | 11   | 14.7 | 6.12 | 5.63  | 12.3 | 9.42  | 11.58 | 3.69   |
| 28019  | 'Ing4'     | 33.97 | 26.21 | 24.8 | 0.04 | 36.3 | 42.04 | 35.6 | 30.85 | 29.89 | 19.01  |
| 28028  | 'Mrpl50'   | 29.61 | 19.65 | 29.3 | 19.7 | 30.6 | 17.14 | 13.8 | 25.78 | 34.15 | 25.89  |
| 280287 | 'Kiss1'    | 26.22 | 2.68  | 3.34 | 2484 | 0.22 | 0.31  | 0.22 | 0.88  | 0.09  | 1.36   |
| 28030  | 'Gfm1'     | 17.85 | 5.15  | 9.4  | 1.7  | 5.05 | 16.83 | 4.46 | 11.33 | 15.59 | 10.65  |

|        |              |       |       |      |      |      |       |      |       |       |        |
|--------|--------------|-------|-------|------|------|------|-------|------|-------|-------|--------|
| 28035  | 'Usp39'      | 10.85 | 22.57 | 25.8 | 7.1  | 11.8 | 19.39 | 5.92 | 10.26 | 12.72 | 3.68   |
| 28036  | 'Larp7'      | 8.62  | 13.31 | 16.4 | 29.2 | 9.96 | 13.25 | 7.13 | 11.71 | 13.3  | 11.55  |
| 28040  | 'D6Wsu163e'  | 9.15  | 13.35 | 26.3 | 17.4 | 4.94 | 3.34  | 14.6 | 12.17 | 14.01 | 10.47  |
| 280408 | 'Rilp'       | 1.92  | 2.16  | 0    | 0    | 3.45 | 0.5   | 0    | 3.36  | 7.92  | 0.06   |
| 280411 | 'Lix1l'      | 0.56  | 0     | 0    | 0    | 1.87 | 0     | 0    | 0.71  | 0     | 0      |
| 28042  | 'Selenoi'    | 5.37  | 8.18  | 5.12 | 4.52 | 7.17 | 2.95  | 4.46 | 4.59  | 7.31  | 3.8    |
| 280621 | 'Selenov'    | 1.9   | 0.04  | 5.51 | 0    | 0.04 | 7.29  | 1.18 | 0.85  | 0     | 1.01   |
| 28064  | 'Yipf3'      | 54.26 | 40.05 | 67.9 | 12.1 | 36.4 | 45.87 | 36.3 | 52.4  | 58.8  | 54.17  |
| 280645 | 'B3gat2'     | 2.03  | 3.97  | 1.44 | 5.28 | 0.77 | 2.32  | 2.16 | 3.54  | 2.02  | 2.07   |
| 280667 | 'Adam1b'     | 0     | 0     | 0    | 0.02 | 0    | 0     | 0    | 0     | 0     | 0      |
| 280668 | 'Adam1a'     | 2.77  | 1.17  | 1.97 | 0    | 5.36 | 0     | 2.56 | 0.71  | 2.48  | 0.04   |
| 28071  | 'Twistnb'    | 21.95 | 29.14 | 9.96 | 20   | 11.8 | 10.41 | 17.5 | 15.93 | 22.76 | 11.86  |
| 28075  | 'Desi1'      | 7.46  | 20.29 | 5.09 | 5.45 | 18.3 | 3.37  | 10.7 | 6.96  | 0.42  | 2.24   |
| 28077  | 'Med10'      | 47.91 | 63.18 | 51.5 | 87.3 | 64.5 | 78.12 | 79.7 | 75    | 64.82 | 101.8  |
| 28080  | 'Atp5o'      | 514.9 | 425   | 717  | 444  | 607  | 789.3 | 744  | 640.6 | 510.6 | 546.26 |
| 28081  | 'Fam104a'    | 21.73 | 25    | 19.8 | 26   | 22.2 | 11.05 | 13.6 | 22.71 | 17.69 | 8.46   |
| 28084  | 'Vps25'      | 65.85 | 118.2 | 59.5 | 84.4 | 112  | 81.81 | 165  | 106.3 | 106   | 98.42  |
| 28088  | 'Rtcb'       | 118.9 | 134.6 | 166  | 136  | 120  | 182.1 | 133  | 134.7 | 155.4 | 183.9  |
| 28105  | 'Trim36'     | 0.9   | 1.81  | 0.35 | 0.3  | 1.87 | 0.16  | 0.2  | 1.99  | 2.11  | 0.22   |
| 28106  | 'Mydgf'      | 151.7 | 121.4 | 103  | 112  | 123  | 183.6 | 132  | 145.8 | 172.2 | 159.68 |
| 28109  | 'D10Wsu102e' | 10.14 | 11.06 | 8.54 | 14.3 | 5.02 | 2.18  | 16.1 | 8.37  | 16.2  | 14.32  |
| 28113  | 'Tinf2'      | 3.82  | 3.08  | 9.75 | 13.4 | 3.01 | 16.44 | 0.64 | 10.47 | 10.51 | 10.7   |
| 28114  | 'Nsun2'      | 9.1   | 10.36 | 8.24 | 29.5 | 6.82 | 2.42  | 21.8 | 14.2  | 13.52 | 3.98   |
| 28126  | 'Nop16'      | 63.67 | 45.18 | 34.5 | 62.7 | 13.8 | 63.82 | 40.3 | 48.28 | 61.72 | 44.33  |
| 28135  | 'Cep63'      | 14.53 | 11.21 | 21.9 | 17.6 | 28   | 18.78 | 8.76 | 12.71 | 8.76  | 11.72  |
| 28146  | 'Serp1'      | 16.2  | 17.64 | 10.1 | 41.7 | 27.3 | 31.4  | 23.5 | 19.12 | 18.85 | 13.92  |
| 28169  | 'Agpat3'     | 6.75  | 5.92  | 11.6 | 14   | 8.44 | 10.6  | 0.87 | 7.45  | 5.84  | 2.42   |
| 28185  | 'Tomm70a'    | 12.6  | 12.53 | 16.9 | 34.3 | 12   | 11.03 | 22   | 11.59 | 15.54 | 2.2    |
| 28193  | 'Reep3'      | 1.05  | 1.77  | 5.21 | 2.64 | 1.59 | 2.04  | 4.42 | 4.27  | 1.8   | 0.94   |
| 28199  | 'Dcaf11'     | 72.03 | 56.91 | 42.1 | 67.1 | 59.6 | 56.65 | 62.6 | 57.57 | 74.97 | 56.25  |
| 28200  | 'Dhrs4'      | 16.08 | 4.41  | 9.92 | 0.13 | 10.4 | 35.98 | 0.07 | 3.28  | 0     | 6.54   |
| 28240  | 'Trpm2'      | 8.07  | 10.95 | 9.81 | 10.3 | 5.9  | 3.03  | 15.1 | 7.04  | 4.39  | 3.48   |
| 28250  | 'Slco1a4'    | 0     | 0     | 0    | 0    | 0.06 | 0     | 0    | 0     | 0     | 0.01   |
| 282619 | 'Sbsn'       | 6.02  | 6.46  | 6.91 | 13.9 | 5.85 | 9.78  | 7.12 | 9.52  | 1.82  | 4.99   |
| 282663 | 'Serpinb1b'  | 8.99  | 8.31  | 4.65 | 0    | 15.7 | 56.5  | 47.6 | 5.48  | 19.68 | 6      |
| 28295  | 'D10Jhu81e'  | 90.43 | 100.3 | 124  | 28.2 | 89.9 | 97.67 | 112  | 117.6 | 124.4 | 105.88 |
| 286940 | 'Flnb'       | 0.68  | 1.52  | 6.44 | 5.14 | 2.4  | 0.17  | 1.91 | 2.91  | 0.84  | 1.6    |
| 286942 | 'Kif19a'     | 0.1   | 0     | 1.19 | 0.21 | 0    | 0     | 0    | 0     | 0.26  | 0.7    |
| 29805  | 'Znhit2'     | 44.06 | 42.53 | 38.8 | 42.2 | 34.4 | 41.89 | 62.1 | 53.54 | 37.24 | 23.68  |
| 29806  | 'Limd1'      | 1.43  | 3.05  | 2.13 | 4.7  | 2.03 | 0.01  | 3.08 | 1.75  | 4.8   | 1.83   |
| 29807  | 'Tpk1'       | 0.02  | 0.02  | 0.25 | 0    | 0.47 | 0     | 0    | 1.62  | 0     | 3.43   |
| 29808  | 'Mga'        | 2.69  | 2.38  | 3.59 | 6.02 | 3.74 | 4.28  | 6.69 | 5.12  | 3.19  | 10.44  |
| 29809  | 'Rabgap1l'   | 2.85  | 9.56  | 5.66 | 9.53 | 8.48 | 4.87  | 6.57 | 3.96  | 4.29  | 4.65   |
| 29810  | 'Bag3'       | 9.51  | 2.21  | 0.74 | 19   | 0.06 | 0.02  | 2.51 | 0.02  | 0.02  | 2.82   |
| 29811  | 'Ndrg2'      | 432.7 | 234.5 | 265  | 351  | 132  | 622.8 | 486  | 232.2 | 217.2 | 311.57 |
| 29812  | 'Ndrg3'      | 187.4 | 146.5 | 204  | 156  | 135  | 154.8 | 336  | 200.1 | 200.5 | 162.56 |
| 29813  | 'Zfp385a'    | 2.9   | 1.8   | 5.72 | 2.46 | 3.8  | 9.59  | 2.71 | 5.15  | 3.82  | 1.63   |
| 29815  | 'Bcar3'      | 4.75  | 12.65 | 3.94 | 6.69 | 3.72 | 29.04 | 11.3 | 5.96  | 15.02 | 13.4   |
| 29816  | 'Hip1r'      | 2.67  | 6.77  | 19.3 | 5.5  | 5.24 | 1.79  | 10.2 | 5.18  | 8.44  | 5.82   |
| 29817  | 'Igfbp7'     | 0.69  | 0     | 0    | 0    | 0.09 | 0     | 0    | 0     | 0     | 0      |
| 29818  | 'Hspb7'      | 0.06  | 0.02  | 0.1  | 0.08 | 0.09 | 0.03  | 0.02 | 0.01  | 0.03  | 0.05   |
| 29819  | 'Stau2'      | 31.59 | 37.34 | 35   | 42.3 | 21.8 | 27.16 | 33.7 | 27.35 | 41.43 | 35     |
| 29820  | 'Tnfrsf19'   | 4.47  | 6.53  | 3.69 | 2.15 | 2.4  | 0.44  | 0.01 | 7.92  | 1     | 7.8    |
| 29856  | 'Smtn'       | 0.14  | 0.31  | 0    | 0    | 0    | 0.01  | 0.3  | 0.61  | 0     | 0.09   |
| 29857  | 'Mapk12'     | 5.24  | 0     | 7.31 | 0    | 5.68 | 0     | 0.36 | 1.62  | 3.3   | 0      |
| 29858  | 'Pmm1'       | 218.2 | 213.1 | 184  | 119  | 206  | 228.2 | 214  | 199.5 | 252.3 | 220.71 |
| 29859  | 'Sult4a1'    | 133.6 | 118.5 | 173  | 88.4 | 127  | 66.68 | 137  | 123.2 | 111.1 | 57.97  |
| 29861  | 'Dpf1'       | 15.21 | 18.56 | 16.2 | 12.9 | 10.9 | 15.58 | 13.5 | 16.17 | 9.76  | 15.94  |

|       |           |       |       |      |      |      |       |      |       |       |        |
|-------|-----------|-------|-------|------|------|------|-------|------|-------|-------|--------|
| 29862 | 'Ninj2'   | 0     | 0     | 3.69 | 0    | 5.79 | 9.07  | 13.4 | 3.24  | 0     | 0      |
| 29863 | 'Pde7b'   | 0.78  | 1.36  | 2.69 | 0.05 | 0.34 | 0.26  | 4.16 | 1.63  | 3.53  | 1.51   |
| 29864 | 'Rnf11'   | 15.07 | 11.69 | 11.4 | 31.2 | 14.3 | 16.35 | 15.2 | 9.11  | 7.07  | 4.91   |
| 29867 | 'Cabp1'   | 0     | 3.13  | 5.28 | 2.49 | 0.61 | 5.56  | 0    | 1.75  | 3.57  | 4.91   |
| 29869 | 'Ulk2'    | 0.16  | 1.4   | 0.95 | 5.18 | 1.99 | 3.01  | 2.56 | 1.11  | 2.8   | 2.89   |
| 29870 | 'Gtse1'   | 0     | 0     | 0    | 8.11 | 2.14 | 0     | 0    | 0     | 0     | 0      |
| 29871 | 'Scmh1'   | 1.65  | 9.34  | 5.7  | 1.79 | 12.7 | 1.23  | 13   | 7.54  | 10.73 | 11.12  |
| 29873 | 'Cspg5'   | 16.68 | 21.4  | 29.3 | 17.6 | 12.2 | 14.43 | 43.8 | 12.17 | 15.01 | 5.37   |
| 29875 | 'lqgap1'  | 0.92  | 2.34  | 7.98 | 7.86 | 2.4  | 1.28  | 1.02 | 1.27  | 2.79  | 9.71   |
| 29876 | 'Clic4'   | 11.96 | 12.12 | 8.19 | 1.63 | 5.03 | 9.96  | 17.3 | 12.64 | 0.06  | 5.28   |
| 29877 | 'Hdglf3'  | 9.74  | 6.76  | 10.9 | 5.5  | 8.51 | 15.56 | 13.7 | 6.35  | 14.22 | 8.45   |
| 30044 | 'Opn4'    | 0     | 0     | 0    | 0    | 1.61 | 0.02  | 0    | 0.37  | 0     | 0      |
| 30045 | 'Dnajc12' | 39.03 | 66.07 | 66.5 | 118  | 57.3 | 107.7 | 99.6 | 60.71 | 105.2 | 54.96  |
| 30046 | 'Zfp292'  | 2.92  | 1     | 3.24 | 5.9  | 3.69 | 1.76  | 2.16 | 1.75  | 3.6   | 1.13   |
| 30049 | 'Scd3'    | 0.06  | 0.11  | 1.14 | 2.93 | 0.08 | 3.07  | 0.09 | 1.81  | 1.54  | 1.21   |
| 30050 | 'Fbxw2'   | 47.5  | 57.75 | 77.8 | 37.5 | 41.9 | 77.86 | 87.4 | 51.3  | 51.05 | 16.74  |
| 30051 | 'Spdef'   | 4.9   | 0.08  | 5.51 | 0.18 | 0.02 | 4.29  | 0.02 | 0.97  | 0     | 24.19  |
| 30052 | 'Pcsk1n'  | 261   | 276.3 | 485  | 494  | 221  | 249.4 | 296  | 164.3 | 182.8 | 145.7  |
| 30054 | 'Rnf17'   | 0.02  | 0     | 0    | 0    | 0    | 0     | 0    | 0     | 1.9   | 0      |
| 30055 | 'Timm13'  | 160.4 | 133.5 | 147  | 141  | 172  | 222.4 | 141  | 135.5 | 138.6 | 155.54 |
| 30056 | 'Timm9'   | 89.68 | 67.44 | 96.7 | 108  | 56.3 | 77.08 | 131  | 90.72 | 69.94 | 79.97  |
| 30057 | 'Timm8b'  | 439.8 | 434.5 | 418  | 578  | 401  | 600.2 | 346  | 428.5 | 419.6 | 416.14 |
| 30058 | 'Timm8a1' | 26.05 | 13.55 | 20.7 | 31.2 | 13.8 | 6.46  | 5.18 | 28    | 9.51  | 10.48  |
| 30059 | 'Timm10'  | 117.1 | 89.13 | 109  | 33.6 | 66.7 | 50.13 | 108  | 118   | 73.39 | 67.24  |
| 30060 | 'Melf'    | 0     | 0.13  | 0.06 | 2.28 | 0.02 | 0.13  | 0    | 0.08  | 0     | 0.07   |
| 30785 | 'Cttnbp2' | 5.55  | 7.49  | 2.56 | 3.35 | 4.44 | 2.34  | 6.71 | 3.75  | 3.17  | 4.27   |
| 30791 | 'Slc39a1' | 11.1  | 14.18 | 28.6 | 31.4 | 26.9 | 8.37  | 12.8 | 8.01  | 36.53 | 26.53  |
| 30794 | 'Pdlim4'  | 7.3   | 8.64  | 3.08 | 0    | 10.4 | 25.45 | 0.06 | 2.08  | 0     | 2.99   |
| 30795 | 'Fkbp3'   | 382.1 | 358.1 | 406  | 414  | 262  | 520   | 426  | 482.9 | 460.8 | 322.06 |
| 30805 | 'Slc22a4' | 5.52  | 3.8   | 11.3 | 7.57 | 8.06 | 2.49  | 6.77 | 12.03 | 2.53  | 7.41   |
| 30806 | 'Adamts8' | 0     | 0     | 0    | 0    | 0    | 0     | 0    | 0     | 0     | 0.94   |
| 30838 | 'Fbxw4'   | 2.46  | 5.02  | 1    | 3.99 | 1.55 | 0.05  | 5.78 | 1.53  | 4     | 1.12   |
| 30839 | 'Fbxw5'   | 71.31 | 102   | 49.3 | 78.5 | 81.2 | 99.3  | 128  | 113   | 70.94 | 90.86  |
| 30840 | 'Fbxl6'   | 24.07 | 15.82 | 16.9 | 7.52 | 39.4 | 16.81 | 14.3 | 7.19  | 18.71 | 28.7   |
| 30841 | 'Kdm2b'   | 2.83  | 3.72  | 5.67 | 4.22 | 1.73 | 0.57  | 11.8 | 1.88  | 4.18  | 2.87   |
| 30843 | 'Fbxl12'  | 8.26  | 5.25  | 3.38 | 7.38 | 7.73 | 2.04  | 10.4 | 7.33  | 1.01  | 4.67   |
| 30853 | 'Mlf2'    | 228.2 | 230   | 202  | 309  | 263  | 254   | 225  | 220.7 | 244.3 | 112.15 |
| 30877 | 'Gnl3'    | 11.84 | 25.99 | 20.5 | 15.1 | 6.26 | 15.17 | 17.1 | 17.37 | 24.43 | 20.7   |
| 30878 | 'Apln'    | 1.12  | 2.9   | 2.78 | 0    | 3.41 | 0     | 0    | 0     | 0     | 0      |
| 30924 | 'Angptl3' | 0     | 0     | 0    | 0    | 0    | 0     | 0    | 0     | 0     | 1.47   |
| 30925 | 'Slamf6'  | 0     | 0.01  | 0.02 | 0    | 0    | 6.28  | 0    | 0     | 0     | 0      |
| 30926 | 'Glr3'    | 101.4 | 107.7 | 97.3 | 113  | 99.5 | 91.85 | 81.7 | 116.1 | 118.1 | 95.4   |
| 30927 | 'Snai3'   | 0     | 0     | 0    | 0    | 0    | 0     | 0    | 0     | 0.47  | 0      |
| 30928 | 'Zbtb18'  | 0.42  | 0.81  | 0.16 | 0.56 | 0.19 | 0.66  | 0.04 | 0.91  | 1.18  | 0.5    |
| 30930 | 'Vps26a'  | 19.7  | 23.02 | 12.4 | 19.3 | 25.1 | 18.59 | 38.2 | 15.85 | 23.39 | 20.61  |
| 30931 | 'Tor1a'   | 49.53 | 58.28 | 62.2 | 59.8 | 38.9 | 68.86 | 37.3 | 61.04 | 43.16 | 59.53  |
| 30932 | 'Zfp330'  | 23.16 | 25.53 | 25.7 | 40.5 | 44.1 | 37.91 | 24.9 | 31.39 | 41.75 | 35.32  |
| 30933 | 'Tor2a'   | 29.13 | 21.99 | 19.4 | 5.07 | 27.6 | 5.81  | 21   | 31.38 | 24.58 | 32.17  |
| 30934 | 'Tor1b'   | 11.11 | 27.83 | 3.56 | 10.8 | 17.1 | 7.23  | 16.4 | 15.36 | 3.84  | 17.39  |
| 30935 | 'Tor3a'   | 2.1   | 3.47  | 1.54 | 5.01 | 0.73 | 1.42  | 0.53 | 1.24  | 6.04  | 6.28   |
| 30936 | 'Slc46a2' | 0     | 0     | 0    | 0    | 0    | 0     | 0    | 0     | 0.46  | 2.24   |
| 30937 | 'Lmcd1'   | 0     | 2.46  | 20.1 | 6.11 | 0    | 0     | 7.52 | 0     | 0     | 2.61   |
| 30938 | 'Fgd3'    | 3.23  | 3.03  | 0    | 1.09 | 3.04 | 2.68  | 0    | 0     | 0     | 1.08   |
| 30939 | 'Pttg1'   | 23.76 | 45.89 | 82.8 | 128  | 125  | 33.42 | 44.2 | 86.4  | 36.47 | 38.61  |
| 30940 | 'Usp25'   | 0.19  | 0     | 2    | 1.94 | 0.68 | 0     | 0    | 0.04  | 0.09  | 0.02   |
| 30941 | 'Usp21'   | 54.05 | 31.8  | 25.3 | 5.05 | 38.1 | 16.96 | 18.4 | 23.96 | 15.34 | 12.79  |
| 30943 | 'Prss30'  | 0.43  | 2.77  | 3.24 | 0    | 0    | 0     | 0    | 2.13  | 0     | 0      |
| 30944 | 'Zfp354c' | 3.6   | 1.03  | 4.62 | 0.11 | 1.68 | 1.18  | 4.04 | 4.83  | 7.99  | 3.52   |



|        |              |       |       |      |      |      |       |      |       |       |        |
|--------|--------------|-------|-------|------|------|------|-------|------|-------|-------|--------|
| 30945  | 'Rnf19a'     | 3.63  | 3.32  | 8.57 | 8    | 4.34 | 1.33  | 4.46 | 7.46  | 5.54  | 4.75   |
| 30946  | 'Abt1'       | 3.99  | 4.15  | 8.66 | 18.3 | 8.31 | 6.19  | 3.88 | 8.68  | 5.05  | 9.06   |
| 30947  | 'Adat1'      | 4.05  | 4.43  | 0.23 | 0.29 | 3.26 | 0.31  | 0.08 | 2.95  | 5.91  | 4.88   |
| 30948  | 'Bin1'       | 81.82 | 73.2  | 71.1 | 57.8 | 73.9 | 70.7  | 108  | 40.77 | 60.33 | 38.99  |
| 30949  | 'Lcmt1'      | 84.91 | 109.1 | 98.9 | 94.2 | 81.7 | 107.6 | 105  | 88.81 | 90.69 | 71.14  |
| 30951  | 'Cbx8'       | 20.57 | 14.02 | 3.3  | 19.2 | 29.7 | 0     | 4.56 | 7.32  | 8.78  | 20.62  |
| 30953  | 'Schip1'     | 65.68 | 67.33 | 59.3 | 28.6 | 107  | 84.49 | 68.7 | 67.7  | 121.3 | 75.95  |
| 30954  | 'Siva1'      | 31.07 | 22.37 | 30.2 | 20.7 | 20.1 | 57.63 | 19.2 | 34.39 | 36.52 | 53.95  |
| 30955  | 'Pik3cg'     | 0.91  | 0     | 0.19 | 0    | 0    | 0     | 0    | 0     | 0     | 0      |
| 30956  | 'Aass'       | 1.08  | 0     | 0    | 0    | 0    | 2.62  | 0.01 | 0     | 0     | 0      |
| 30957  | 'Mapk8ip3'   | 42.14 | 52.55 | 80.5 | 39.9 | 45.1 | 37.42 | 65.1 | 44.87 | 66.23 | 54.5   |
| 30959  | 'Ddx25'      | 75.27 | 60.89 | 112  | 94.4 | 80.7 | 104.7 | 127  | 139.5 | 81.56 | 104.63 |
| 30960  | 'Vapa'       | 90.51 | 86.33 | 113  | 202  | 88.5 | 75.62 | 105  | 66.74 | 85.73 | 65.76  |
| 30963  | 'Hacd1'      | 13.24 | 2.32  | 0.11 | 0    | 33.1 | 0.05  | 10.1 | 14.62 | 16.7  | 2.73   |
| 317652 | 'Klk15'      | 0     | 0     | 0    | 0    | 0    | 0     | 0    | 0     | 0.06  | 0      |
| 317653 | 'Klk14'      | 0     | 0.06  | 0.08 | 0.2  | 0.02 | 0.03  | 0.04 | 0     | 0.14  | 0.03   |
| 317717 | 'Sec22a'     | 19.02 | 19.3  | 26.6 | 36.7 | 18.4 | 31.2  | 36.3 | 35.47 | 26.77 | 27.67  |
| 317750 | 'Slc24a5'    | 0     | 0.49  | 0    | 20.3 | 2.33 | 7.72  | 0    | 1.02  | 0     | 6.47   |
| 317755 | 'Zar1'       | 2.83  | 0.78  | 0    | 0    | 0.63 | 0     | 0    | 0     | 2.62  | 0.55   |
| 317757 | 'Gimap5'     | 0     | 0     | 0    | 0    | 0    | 0     | 0    | 0     | 0     | 3.52   |
| 319146 | 'Ifnz'       | 0     | 0     | 0    | 0    | 0    | 0     | 0    | 0     | 0.31  | 0      |
| 319149 | 'Hist1h3d'   | 0     | 0.42  | 5.9  | 0    | 0    | 5.74  | 0    | 0     | 0     | 0      |
| 319150 | 'Hist1h3b'   | 0     | 0     | 0    | 0    | 0.12 | 0     | 3.02 | 0     | 0     | 0      |
| 319151 | 'Hist1h3e'   | 0     | 4.22  | 6.37 | 9.09 | 0.12 | 25.27 | 0.75 | 3.28  | 6.23  | 0      |
| 319152 | 'Hist1h3h'   | 0.93  | 0     | 0.13 | 0    | 0    | 0     | 0    | 0     | 0     | 0      |
| 319153 | 'Hist1h3i'   | 0     | 0     | 0.16 | 0.4  | 0    | 2.35  | 0    | 0.19  | 0.23  | 0.21   |
| 319154 | 'Hist2h3b'   | 0     | 3.08  | 0.29 | 0    | 3.22 | 0     | 0    | 0.58  | 3.1   | 2.67   |
| 319155 | 'Hist1h4c'   | 4.47  | 7.28  | 4.29 | 32.8 | 2.89 | 7.33  | 16.8 | 1.32  | 7.67  | 7.46   |
| 319156 | 'Hist1h4d'   | 9.44  | 8.55  | 9.63 | 31.2 | 1.09 | 24.36 | 6.37 | 2.07  | 7.83  | 4.42   |
| 319157 | 'Hist1h4f'   | 0     | 0     | 1.34 | 0    | 0    | 0     | 0    | 0     | 0     | 0      |
| 319158 | 'Hist1h4i'   | 3.02  | 2.35  | 12.5 | 10.2 | 0    | 6     | 21   | 6.15  | 15.81 | 7.27   |
| 319160 | 'Hist1h4k'   | 0     | 0.79  | 0    | 0    | 0    | 0     | 0    | 0     | 0     | 0      |
| 319162 | 'Hist3h2a'   | 43.54 | 44.83 | 11.6 | 37.3 | 53.8 | 56.28 | 42.6 | 40.95 | 52.46 | 48.77  |
| 319164 | 'Hist1h2ac'  | 0     | 0.96  | 0    | 0    | 0    | 0     | 0.16 | 0     | 0     | 0.16   |
| 319165 | 'Hist1h2ad'  | 0.23  | 0.21  | 0    | 0    | 0    | 0.35  | 3.69 | 0     | 0.39  | 0      |
| 319166 | 'Hist1h2ae'  | 11.56 | 5.03  | 4.46 | 9.86 | 6.2  | 8.91  | 17.2 | 6.91  | 3.19  | 5.38   |
| 319167 | 'Hist1h2ag'  | 0     | 3.16  | 0    | 0    | 0    | 3.54  | 0    | 0     | 3.58  | 0.75   |
| 319169 | 'Hist1h2ak'  | 0     | 0     | 0.41 | 0    | 0    | 0     | 1.23 | 0     | 0     | 2.06   |
| 319171 | 'Hist1h2ap'  | 3.2   | 5.33  | 9.1  | 32.1 | 2.09 | 18.9  | 12.2 | 2.03  | 9.32  | 4      |
| 319172 | 'Hist1h2ab'  | 0     | 3.23  | 0    | 0    | 0    | 0     | 3.5  | 0.59  | 0     | 0      |
| 319173 | 'Hist1h2af'  | 0     | 0     | 0    | 0.09 | 0    | 0.08  | 0    | 0     | 0     | 0.13   |
| 319176 | 'Hist2h2ac'  | 0     | 2.08  | 0    | 0    | 2.01 | 0     | 0    | 0     | 0     | 1.98   |
| 319178 | 'Hist1h2bb'  | 2.06  | 0     | 0    | 0    | 0    | 0     | 0    | 0     | 0     | 0      |
| 319179 | 'Hist1h2be'  | 3.41  | 1     | 0.02 | 6.27 | 0    | 7.47  | 2.61 | 1.93  | 0.11  | 2.29   |
| 319181 | 'Hist1h2bg'  | 0     | 7.54  | 0.49 | 0    | 4.23 | 1.8   | 9.14 | 1.2   | 0     | 4.77   |
| 319183 | 'Hist1h2bj'  | 0     | 0     | 0    | 0    | 0    | 0     | 4.9  | 0     | 0     | 0.58   |
| 319184 | 'Hist1h2bk'  | 0     | 0     | 0    | 0    | 0    | 0     | 0.46 | 0     | 0     | 0      |
| 319186 | 'Hist1h2bm'  | 0     | 0     | 0    | 0    | 0    | 4.09  | 0    | 0     | 0     | 0      |
| 319187 | 'Hist1h2bn'  | 0     | 1.17  | 0    | 0    | 0    | 0     | 2.62 | 0     | 0     | 0      |
| 319188 | 'Hist1h2bp'  | 0     | 0     | 0    | 0    | 0    | 4.7   | 0    | 0     | 0     | 0      |
| 319189 | 'Hist2h2bb'  | 0     | 0.33  | 1.96 | 0    | 3.99 | 0.95  | 5.76 | 1.83  | 1.97  | 0      |
| 319190 | 'Hist2h2be'  | 0     | 0     | 0    | 0    | 1.74 | 0     | 1.53 | 0     | 3.67  | 0      |
| 319191 | 'Hist1h2ai'  | 1.05  | 0     | 2.4  | 7.96 | 0    | 0     | 0    | 1.12  | 0     | 6      |
| 319192 | 'Hist2h2aa2' | 0     | 0     | 5.83 | 0    | 4.76 | 0     | 0    | 0     | 0     | 6      |
| 319195 | 'Rpl17'      | 167.9 | 159.5 | 221  | 237  | 106  | 193   | 147  | 139.7 | 151.2 | 171.58 |
| 319196 | 'Ankef1'     | 0.16  | 4.71  | 4.31 | 0    | 2.48 | 0     | 1.35 | 0     | 5.95  | 1.74   |
| 319197 | 'Gpr4'       | 0     | 0     | 0.76 | 0    | 0    | 0     | 0    | 0     | 1.24  | 1.56   |
| 319200 | 'Gpr82'      | 0     | 0.64  | 0.92 | 0.01 | 0    | 0.02  | 0    | 0     | 0     | 1.12   |

|        |                 |       |       |      |      |      |       |      |       |       |        |
|--------|-----------------|-------|-------|------|------|------|-------|------|-------|-------|--------|
| 319207 | 'Pgbd1'         | 1.23  | 5.29  | 0.02 | 0    | 0.59 | 0     | 0    | 2.23  | 0.59  | 1.3    |
| 319211 | 'Nol4'          | 23.98 | 20.24 | 25   | 30   | 25.9 | 12.91 | 18.8 | 26.22 | 20.16 | 24     |
| 319229 | 'Sctr'          | 0     | 0     | 0    | 0    | 0.29 | 0     | 0    | 0     | 0     | 0      |
| 319236 | 'Trim12c'       | 0     | 0     | 1    | 0    | 0.04 | 0.06  | 0    | 0     | 0.01  | 0.02   |
| 319239 | 'Npsr1'         | 0.91  | 0     | 0.08 | 0    | 0.03 | 5.54  | 11.1 | 0     | 0     | 0      |
| 319259 | 'Bricd5'        | 0     | 0     | 0    | 0    | 0    | 0     | 13.8 | 0     | 0     | 0      |
| 319262 | 'Fchsd1'        | 5.3   | 5.8   | 5.39 | 6.93 | 2.06 | 0.03  | 2.89 | 1.37  | 6.78  | 5.77   |
| 319263 | 'Pcmt1'         | 7.53  | 14.57 | 19.3 | 11.2 | 19.6 | 4.36  | 11.1 | 12.52 | 16.84 | 10.42  |
| 319266 | 'A130010J15Rik' | 0.11  | 5.78  | 7.68 | 5.42 | 7.58 | 2.44  | 0.92 | 1.44  | 5.64  | 3.32   |
| 319277 | 'Washc4'        | 19.66 | 21.7  | 22   | 63.2 | 19.6 | 16.54 | 16.4 | 11.42 | 22.01 | 12.58  |
| 319278 | 'A230050P20Rik' | 100.4 | 118   | 153  | 120  | 105  | 75.96 | 103  | 125.7 | 158.7 | 48.48  |
| 319322 | 'Sf3b2'         | 123.7 | 112   | 133  | 119  | 135  | 139.2 | 101  | 121   | 179.9 | 160.74 |
| 319352 | 'Pianp'         | 76.65 | 76.01 | 148  | 65.8 | 93.6 | 50.15 | 93.3 | 95.1  | 52.21 | 42.33  |
| 319370 | 'Ubal2'         | 4.04  | 1.68  | 4.01 | 1.44 | 2.66 | 0.38  | 1.95 | 2.8   | 6.61  | 2.74   |
| 319387 | 'Adgr13'        | 1.06  | 3.11  | 3.56 | 4.48 | 3.25 | 5.09  | 1.42 | 4.38  | 2.29  | 2.37   |
| 319415 | 'Hs3st5'        | 22.43 | 10.27 | 0.18 | 19.8 | 1.2  | 0.79  | 7.72 | 4.53  | 0     | 1.07   |
| 319430 | 'C5ar2'         | 0.03  | 0.03  | 0    | 0    | 0.03 | 0.03  | 0.01 | 0.03  | 0.03  | 0.12   |
| 319433 | 'Serpine3'      | 0     | 0     | 0    | 0    | 0    | 0     | 0.04 | 0     | 3.64  | 0      |
| 319446 | 'Dpep2'         | 0.35  | 0     | 0    | 0    | 0.25 | 0     | 0    | 0.27  | 0     | 0.28   |
| 319448 | 'Fndc3a'        | 10.17 | 11.34 | 11.6 | 21.3 | 13.8 | 4.98  | 10.7 | 4.52  | 22.61 | 14.71  |
| 319455 | 'Pld5'          | 2.8   | 6     | 8.2  | 5.54 | 23.7 | 2.58  | 0.05 | 7.15  | 3.91  | 10.36  |
| 319468 | 'Ppm1h'         | 33.39 | 13.59 | 27.6 | 16.4 | 31.8 | 35.9  | 9.23 | 33.68 | 34.45 | 17.82  |
| 319475 | 'Zfp672'        | 15.66 | 4.54  | 9.38 | 3.92 | 10.2 | 5.42  | 13.8 | 11.79 | 31.25 | 11.64  |
| 319476 | 'Lrtm1'         | 0.01  | 0.01  | 0.01 | 0    | 0.01 | 0.01  | 0.01 | 0     | 0.02  | 0.01   |
| 319477 | 'Insyn1'        | 3.62  | 4.04  | 4.11 | 3.03 | 12.7 | 19.06 | 3.32 | 8.76  | 15.84 | 17.4   |
| 319478 | 'Cxxc4'         | 4.38  | 5.82  | 4.94 | 8.08 | 3.88 | 1.45  | 5.39 | 4.76  | 4.48  | 5.6    |
| 319480 | 'Itga11'        | 0     | 0.12  | 0    | 0.09 | 0.01 | 0     | 0    | 0     | 0     | 1.73   |
| 319481 | 'Wdr59'         | 0.31  | 0.7   | 2.61 | 4.05 | 4.4  | 0.02  | 3.75 | 2.27  | 4.71  | 2.72   |
| 319482 | '9530053A07Rik' | 0     | 0.01  | 0    | 0    | 0    | 0     | 0    | 0     | 0     | 0      |
| 319493 | 'A430078G23Rik' | 0.84  | 0.78  | 0.57 | 1.94 | 1.02 | 0.91  | 1.24 | 0.75  | 0.96  | 1.56   |
| 319504 | 'Nrcam'         | 16.22 | 7.24  | 9.73 | 10.8 | 16.4 | 4.28  | 25.2 | 16.52 | 22.23 | 23.4   |
| 319508 | 'Syt15'         | 0.07  | 0.04  | 0.24 | 0.25 | 0.08 | 0.07  | 0.04 | 0.03  | 0.04  | 0.04   |
| 319513 | 'Pced1a'        | 5.95  | 6.03  | 2.42 | 4.98 | 10   | 5     | 3.1  | 2.44  | 11.66 | 11.63  |
| 319518 | 'Pdpr'          | 1.65  | 4.27  | 2.83 | 0.64 | 3.43 | 1.99  | 9.87 | 5.13  | 0.23  | 0.24   |
| 319520 | 'Dusp4'         | 0.6   | 2.27  | 1.97 | 0    | 2.12 | 0.49  | 0.02 | 1.05  | 2.5   | 2.01   |
| 319530 | 'Zfp750'        | 0     | 0     | 1.61 | 0    | 0    | 0     | 0    | 0.88  | 0.07  | 0      |
| 319535 | 'Zfp182'        | 1.13  | 1.39  | 1.64 | 0.91 | 1.9  | 2.62  | 1.71 | 0.83  | 0.93  | 1.11   |
| 319552 | 'Spx'           | 0     | 2.11  | 0.04 | 0    | 0.03 | 0     | 0    | 0.02  | 4.49  | 0.08   |
| 319554 | 'Idi1'          | 22.88 | 10.88 | 16.9 | 12.8 | 7.98 | 4.99  | 11.2 | 20.59 | 14.35 | 11.51  |
| 319555 | 'Nwd1'          | 0.01  | 1.02  | 1.98 | 1.85 | 1.44 | 0.33  | 0.03 | 1.3   | 0.33  | 0.45   |
| 319565 | 'Syne2'         | 1.53  | 1.35  | 0.41 | 1.54 | 0.75 | 0.72  | 1.19 | 0.78  | 0.85  | 0.6    |
| 319582 | 'Trmt9b'        | 0     | 0     | 2.28 | 13.2 | 2.02 | 2.57  | 6.77 | 3.42  | 2.61  | 3.24   |
| 319583 | 'Lig4'          | 3.01  | 1.16  | 3.59 | 0    | 4.4  | 0.3   | 0    | 1.68  | 4.64  | 1.64   |
| 319586 | 'Celf5'         | 7.19  | 7.18  | 7.07 | 6.89 | 8.81 | 6.58  | 5.59 | 7.09  | 10.7  | 8.31   |
| 319594 | 'Hif1an'        | 0.15  | 2.05  | 1.96 | 3.33 | 2.91 | 3.17  | 1.59 | 3.18  | 7.18  | 0.29   |
| 319601 | 'Zfp653'        | 4.84  | 3.77  | 0.98 | 1.95 | 2.57 | 0.03  | 3.79 | 12.65 | 2.28  | 2.72   |
| 319604 | 'Fam168a'       | 10.39 | 9.59  | 13.9 | 15.9 | 22.9 | 9.9   | 30.8 | 10.71 | 5.57  | 14     |
| 319613 | 'Sybu'          | 69.75 | 78.86 | 48.2 | 43.4 | 42.4 | 56.15 | 57.4 | 53.38 | 53.82 | 30.37  |
| 319615 | 'Zfp944'        | 9.36  | 2.11  | 12.9 | 6.34 | 9.95 | 3.37  | 7.65 | 2.88  | 8.14  | 9.56   |
| 319618 | 'Dcp1b'         | 7.09  | 5.27  | 2.6  | 14.6 | 5.34 | 0.8   | 6.25 | 8.25  | 3.5   | 6.68   |
| 319622 | 'Itpr12'        | 0     | 0     | 0    | 0    | 0    | 0.01  | 0    | 0.3   | 0     | 0      |
| 319625 | 'Galm'          | 0     | 0     | 0.3  | 0.06 | 0    | 0     | 0.02 | 0     | 0     | 0      |
| 319634 | 'Efcab5'        | 0     | 0.11  | 0    | 1.52 | 0.57 | 0.01  | 0    | 0     | 0.37  | 0.61   |
| 319636 | 'Fsd1l'         | 7.31  | 5.14  | 3.44 | 2.26 | 3.74 | 7.83  | 8.58 | 5.24  | 6.83  | 6.99   |
| 319638 | 'Nt5dc1'        | 0.82  | 2.05  | 2.67 | 0    | 4.13 | 3.6   | 10.2 | 0.02  | 3.71  | 3.16   |
| 319642 | 'Rab9b'         | 35.98 | 52.22 | 32.9 | 31.8 | 30.1 | 11.19 | 62.1 | 33.3  | 31.77 | 56.83  |
| 319651 | 'Usp37'         | 11.59 | 7.68  | 6.71 | 17.6 | 11.8 | 5.63  | 3.34 | 8.97  | 8.49  | 5.33   |
| 319653 | 'Slc25a40'      | 7.71  | 12.64 | 2.5  | 0    | 6.92 | 0.63  | 9.92 | 1.83  | 6.51  | 8.98   |

|        |                 |       |       |      |      |      |       |      |       |       |       |
|--------|-----------------|-------|-------|------|------|------|-------|------|-------|-------|-------|
| 319655 | 'Podxl2'        | 149.3 | 137.4 | 343  | 96.3 | 90.4 | 69    | 214  | 52.62 | 245.8 | 32.14 |
| 319660 | 'Agmo'          | 3.08  | 0     | 0    | 0.04 | 0    | 0     | 0    | 0     | 0     | 2.77  |
| 319670 | 'Eml5'          | 2.59  | 3.01  | 2.92 | 11.5 | 4.9  | 4.2   | 7.39 | 3.57  | 7.28  | 4.97  |
| 319675 | 'Cep295'        | 0.72  | 1.01  | 0.72 | 2.6  | 3.46 | 1.55  | 1.23 | 1.58  | 2.43  | 1.68  |
| 319695 | 'Ankar'         | 0     | 0.13  | 0.14 | 0    | 0    | 0     | 0    | 0     | 0.01  | 0     |
| 319710 | 'Frm6'          | 1.76  | 5.82  | 0    | 0    | 0.54 | 0.58  | 0.01 | 0.51  | 1.61  | 5.26  |
| 319713 | 'Ablim3'        | 9.25  | 7.63  | 5.19 | 10.6 | 6.12 | 0.5   | 3.72 | 6.55  | 10.7  | 16.05 |
| 319719 | 'Simc1'         | 9.74  | 8.79  | 16.2 | 8.78 | 0.96 | 1.46  | 12.1 | 3.09  | 6.32  | 6.36  |
| 319734 | 'Cacna2d4'      | 0.01  | 0     | 0    | 1.5  | 0.82 | 1.18  | 1.47 | 0.89  | 0     | 0     |
| 319740 | 'Zfyve27'       | 17.85 | 14.4  | 15.3 | 13.8 | 12.4 | 12.09 | 15.2 | 10.35 | 21.22 | 14.71 |
| 319742 | 'Mpzl3'         | 0     | 0     | 0    | 0    | 1.67 | 0     | 5.9  | 0     | 0.77  | 2.39  |
| 319748 | 'Zfp865'        | 0.07  | 1.45  | 0.49 | 0    | 0.17 | 0     | 0.6  | 0.71  | 0     | 0.46  |
| 319757 | 'Smo'           | 1.69  | 3.45  | 0    | 0    | 2.72 | 2.82  | 0.02 | 0     | 8.94  | 0     |
| 319758 | 'Rfx7'          | 1.42  | 0.87  | 1.51 | 6.99 | 0.88 | 1.46  | 0.75 | 0.32  | 3.25  | 0.84  |
| 319765 | 'Igf2bp2'       | 0.32  | 0     | 0    | 1.25 | 0.01 | 0.18  | 0.66 | 0.55  | 0     | 1.4   |
| 319767 | 'Atp10b'        | 0.18  | 0.1   | 0    | 0    | 0.02 | 0.07  | 0    | 0.01  | 0.31  | 0.45  |
| 319772 | 'C130050O18Rik' | 0     | 0     | 0    | 0    | 0    | 8.19  | 0    | 1.43  | 0     | 0.19  |
| 319776 | 'Tmem72'        | 0     | 0     | 0    | 0    | 3.09 | 0     | 0    | 0     | 0     | 0     |
| 319801 | 'Tigar'         | 1.22  | 1.57  | 2.56 | 5.79 | 2.7  | 2.07  | 0    | 3.33  | 3.19  | 0.44  |
| 319804 | 'Glt1d1'        | 3.23  | 2.38  | 1.21 | 7.54 | 1.88 | 0.74  | 8.9  | 1.75  | 6.21  | 0.64  |
| 319807 | 'Nwd2'          | 0.42  | 0     | 1.21 | 0    | 1.52 | 0.16  | 2.31 | 0.09  | 0.49  | 4.73  |
| 319817 | 'Rc3h2'         | 1.94  | 1.96  | 1.99 | 1.83 | 2.54 | 1.93  | 1.12 | 1.33  | 0.94  | 0.88  |
| 319822 | 'Smyd4'         | 17.48 | 5.15  | 6.1  | 0.96 | 16   | 4.61  | 4.75 | 6.56  | 1.85  | 13.29 |
| 319832 | 'Tmem229a'      | 1.34  | 2.74  | 0.27 | 3.88 | 0.76 | 0.65  | 0.03 | 0.99  | 0.14  | 0.13  |
| 319845 | 'Bbs9'          | 11.32 | 14.36 | 15.8 | 10.9 | 4.67 | 10.36 | 5.17 | 9     | 6.69  | 10.07 |
| 319876 | 'Cobll1'        | 0.03  | 0     | 1.45 | 1.66 | 0.23 | 0     | 0.32 | 0     | 0.62  | 0.63  |
| 319880 | 'Tmcc3'         | 16.56 | 10.96 | 5.8  | 21.1 | 7.07 | 3.5   | 6.83 | 3.49  | 1.42  | 2.11  |
| 319885 | 'Zcchc7'        | 23.47 | 21.45 | 42.6 | 39.5 | 19.1 | 22.01 | 20.1 | 12.11 | 32.62 | 19.05 |
| 319887 | 'E030030I06Rik' | 2.59  | 3.11  | 4.33 | 3.77 | 4.1  | 4.82  | 3.35 | 3.49  | 2.72  | 2.06  |
| 319888 | 'Oacyl'         | 0     | 0     | 0    | 0    | 0.9  | 0     | 0    | 0     | 0.05  | 0     |
| 319899 | 'Dock6'         | 1.78  | 0.02  | 7.38 | 1.4  | 1.9  | 0.84  | 0    | 2.37  | 3.51  | 2.42  |
| 319901 | 'Dsel'          | 4.09  | 0.77  | 6.73 | 2.99 | 1.89 | 1.93  | 9.61 | 1.34  | 4.19  | 1.95  |
| 319909 | 'Ism1'          | 0.01  | 0     | 1.03 | 6.53 | 2.99 | 0     | 0    | 0.72  | 0     | 2.08  |
| 319922 | 'Vwc2'          | 0.01  | 0.02  | 1.11 | 0    | 1.05 | 5.75  | 5.28 | 4.43  | 3.37  | 0     |
| 319924 | 'Apba1'         | 2.55  | 2.09  | 1.47 | 2.43 | 0.65 | 0.42  | 0.57 | 1.59  | 2.93  | 3.8   |
| 319934 | 'Sbf2'          | 0.73  | 1.05  | 0.86 | 1.94 | 1.97 | 1.21  | 1.04 | 2.72  | 5.13  | 1.2   |
| 319939 | 'Tns3'          | 1.32  | 0.58  | 0.7  | 0    | 0.7  | 0.18  | 0    | 0.19  | 0.62  | 0.21  |
| 319942 | 'A530016L24Rik' | 0     | 0     | 0.9  | 0    | 0.02 | 0     | 0.99 | 0     | 2.25  | 0.02  |
| 319944 | 'Taf2'          | 1.26  | 0.63  | 3.15 | 5.31 | 2.35 | 0.02  | 3.05 | 2.75  | 4.51  | 1.89  |
| 319945 | 'Flad1'         | 25.61 | 25.66 | 57.5 | 21.1 | 25.7 | 30.81 | 29.7 | 46.46 | 36.92 | 38.77 |
| 319953 | 'Till1'         | 81.34 | 85.59 | 67.3 | 113  | 85.4 | 114.5 | 73.3 | 90.69 | 107.2 | 89.62 |
| 319955 | 'Ercc6'         | 3.82  | 2.87  | 4.03 | 2.22 | 2.63 | 2.78  | 11.6 | 4.42  | 10.26 | 4.24  |
| 319965 | 'Cc2d1b'        | 5.03  | 9.59  | 10.4 | 2.23 | 14.5 | 8     | 5.14 | 13.56 | 19.37 | 18.77 |
| 319974 | 'Auts2'         | 4.35  | 2.25  | 2.66 | 0.17 | 2.57 | 5.54  | 1.26 | 2.56  | 6     | 1.99  |
| 319984 | 'Jph4'          | 7.95  | 8.45  | 4.86 | 12.8 | 18.2 | 7.08  | 5.69 | 7.62  | 9.87  | 9.23  |
| 319991 | 'Kif6'          | 0.2   | 0.92  | 0.2  | 0.99 | 2.99 | 0     | 0    | 1.73  | 0     | 0.21  |
| 319996 | 'Casc4'         | 10.51 | 15.93 | 19.6 | 50.3 | 17.1 | 19.06 | 17.1 | 11.51 | 15.71 | 16.78 |
| 319998 | 'Tmem198'       | 24.74 | 23.54 | 8.44 | 16.1 | 19.1 | 15.21 | 8.12 | 27.84 | 11.89 | 9.66  |
| 320007 | 'Sidt1'         | 14.11 | 4.58  | 4.54 | 8.85 | 15.9 | 4.78  | 10.1 | 6.28  | 16.07 | 17.66 |
| 320011 | 'Uggt1'         | 6.38  | 6.94  | 9.4  | 2.84 | 1.6  | 6.51  | 11   | 7.66  | 8.45  | 6.24  |
| 320022 | 'Terb1'         | 0     | 1.47  | 0    | 0    | 0    | 0.04  | 0    | 0     | 2.19  | 0     |
| 320024 | 'Nceh1'         | 24.76 | 29.83 | 34   | 12   | 28.5 | 31.3  | 40.9 | 27.63 | 40.75 | 19.89 |
| 320027 | 'Fstl4'         | 14.19 | 6.66  | 5.31 | 4.35 | 0.03 | 7.26  | 9.65 | 7.08  | 14.44 | 3.09  |
| 320051 | 'Exp5'          | 0.21  | 0     | 0.12 | 0    | 0.29 | 0     | 0    | 0     | 0     | 0     |
| 320078 | 'Olfml2b'       | 0     | 1.95  | 0.02 | 0    | 0    | 0     | 0.34 | 2.39  | 0     | 0     |
| 320080 | 'Zbtb39'        | 0     | 0     | 0.02 | 0.02 | 0    | 0     | 0    | 0     | 0.01  | 0.01  |
| 320082 | 'Fbxw21'        | 0     | 0     | 0    | 0    | 0.02 | 0.02  | 0.02 | 0     | 0     | 0     |
| 320091 | 'Ano4'          | 1.04  | 1.24  | 5.16 | 0    | 4.94 | 0     | 1.25 | 2.36  | 0.54  | 3.69  |

|        |                 |       |       |      |      |      |       |      |       |       |        |
|--------|-----------------|-------|-------|------|------|------|-------|------|-------|-------|--------|
| 320095 | '6430550D23Rik' | 0     | 1.43  | 3.76 | 0    | 0    | 0     | 0    | 0     | 0     | 0      |
| 320100 | 'Relt'          | 35.85 | 39.61 | 19.5 | 61.8 | 23.5 | 26.55 | 11.2 | 11.33 | 48.41 | 19.07  |
| 320106 | 'Slc38a11'      | 0     | 0     | 0    | 0    | 0    | 1.24  | 0    | 0     | 0     | 0.08   |
| 320111 | 'Prr18'         | 2.88  | 3.48  | 0    | 0    | 8.04 | 1.81  | 2.69 | 0.23  | 0     | 3.33   |
| 320116 | 'Fndc9'         | 62.13 | 75.66 | 74.2 | 201  | 37.3 | 23.9  | 22.3 | 72.82 | 48.81 | 52.83  |
| 320118 | 'Fbxl13'        | 0     | 0     | 0.09 | 5.79 | 0    | 0     | 0    | 0     | 0     | 0      |
| 320119 | 'Rps6kc1'       | 6.69  | 8.04  | 19   | 24.5 | 22   | 3.3   | 6.13 | 12.34 | 15.25 | 5.65   |
| 320127 | 'Dgki'          | 1.33  | 1.25  | 1.09 | 0.55 | 1.38 | 0.6   | 0.1  | 0.99  | 0.7   | 0.35   |
| 320129 | 'Grk3'          | 3.07  | 4.37  | 6.93 | 0.98 | 5.92 | 0.15  | 1.91 | 2.47  | 4.51  | 4.37   |
| 320135 | 'BC049715'      | 0.43  | 3.98  | 3.69 | 0.17 | 0.3  | 0     | 0.97 | 0     | 0.76  | 0.04   |
| 320139 | 'Ptpn7'         | 0.15  | 0.09  | 0.05 | 0.17 | 0.09 | 0.26  | 0.17 | 0.02  | 0.2   | 0.13   |
| 320145 | 'Sp8'           | 0     | 0.47  | 0    | 0    | 0.87 | 0     | 0    | 0     | 0     | 0      |
| 320148 | 'B430306N03Rik' | 0     | 0     | 0    | 0    | 0    | 0.01  | 0    | 0     | 0     | 0      |
| 320150 | 'Zdhhc17'       | 27.64 | 20.83 | 25   | 10.8 | 15.8 | 5.12  | 13.2 | 20.82 | 27.82 | 16.74  |
| 320158 | 'Zmat4'         | 5.83  | 12.49 | 6.1  | 13.4 | 9.2  | 1.8   | 15.6 | 17.33 | 5.49  | 0.62   |
| 320159 | 'Togaram2'      | 1.69  | 1.04  | 0.01 | 1.69 | 0.69 | 0     | 0    | 9.6   | 2.25  | 1.57   |
| 320162 | 'Cep95'         | 0.89  | 2.22  | 4.07 | 0.91 | 2.56 | 0.18  | 3.12 | 0.15  | 4.58  | 5.48   |
| 320165 | 'Tacc1'         | 12.05 | 21.43 | 13.8 | 8.42 | 13.7 | 10.39 | 11   | 19.73 | 19.11 | 18.17  |
| 320183 | 'Msr3'          | 0.02  | 0     | 0.04 | 0    | 0    | 0     | 0    | 0.01  | 0.02  | 0      |
| 320184 | 'Lrrc58'        | 6.9   | 10.09 | 12.1 | 10.4 | 7.46 | 2.61  | 8.84 | 3.52  | 7.42  | 7.72   |
| 320191 | 'Hook3'         | 8.99  | 10.89 | 7.53 | 3.45 | 3.75 | 14.9  | 17.6 | 8.33  | 13.66 | 10.86  |
| 320204 | 'Etfbkmt'       | 40.25 | 8.57  | 9.97 | 15.6 | 1.4  | 3.84  | 3.21 | 22.76 | 14.55 | 7.32   |
| 320207 | 'Pik3r5'        | 0.43  | 2.95  | 0.04 | 0.01 | 0.02 | 0.04  | 0    | 0.01  | 0.03  | 0      |
| 320208 | 'Tmem91'        | 266.1 | 169.1 | 228  | 235  | 261  | 339.4 | 204  | 246.3 | 223.8 | 187.08 |
| 320209 | 'Ddx11'         | 1.16  | 1.07  | 0.03 | 6.43 | 2    | 0.01  | 7.44 | 1.9   | 2.58  | 0.08   |
| 320213 | 'Senp5'         | 6.75  | 8.59  | 7.57 | 0.95 | 6.7  | 4.28  | 16   | 6.49  | 1.31  | 8.79   |
| 320214 | 'Maats1'        | 0.51  | 2.26  | 1.42 | 0.2  | 1.15 | 2.16  | 5.01 | 0.14  | 2.74  | 1.41   |
| 320225 | 'Catsperg1'     | 3.95  | 1     | 2.1  | 1.29 | 0.84 | 4.77  | 0.23 | 1     | 0     | 1.62   |
| 320226 | 'Ccdc171'       | 1.67  | 0.12  | 0    | 5.83 | 0.01 | 0.01  | 1.25 | 0     | 0.53  | 1.08   |
| 320234 | 'Ccdc66'        | 7.26  | 10.3  | 5.11 | 0    | 6.88 | 14.31 | 4.98 | 17.26 | 3.63  | 10.29  |
| 320244 | 'Ttl5'          | 5.98  | 5.01  | 11.1 | 9.71 | 4.8  | 7.06  | 10.1 | 9.74  | 0.34  | 7.6    |
| 320253 | 'March3'        | 0.43  | 2.56  | 0.94 | 1.84 | 0.92 | 0     | 0.08 | 0.51  | 0.47  | 0.18   |
| 320256 | 'Dlec1'         | 1.13  | 3.11  | 1.48 | 0    | 0.38 | 0.35  | 1.05 | 3.66  | 1.13  | 0.57   |
| 320265 | 'Fam19a1'       | 5.14  | 7.21  | 8.82 | 16   | 4.93 | 20.88 | 1.19 | 7.33  | 9.68  | 20.96  |
| 320267 | 'Fubp3'         | 4.62  | 5.52  | 9.31 | 2.85 | 10.1 | 2.81  | 9    | 3.9   | 3.01  | 5.36   |
| 320271 | 'Scai'          | 1.64  | 5.93  | 3.27 | 4.2  | 2.4  | 9.99  | 3.63 | 3.99  | 6.12  | 3.98   |
| 320277 | 'Spef2'         | 0     | 0.36  | 0    | 3.13 | 0.15 | 0     | 0    | 0     | 0     | 0.05   |
| 320292 | 'Rasgef1b'      | 0.36  | 4.69  | 5.28 | 1.79 | 1.84 | 1.82  | 6.51 | 17.6  | 1.51  | 3.53   |
| 320299 | 'lqcb1'         | 37.2  | 41.45 | 55.8 | 51.7 | 50.2 | 44.01 | 55.9 | 49.01 | 43.22 | 42.97  |
| 320302 | 'Glt28d2'       | 0     | 2.3   | 0.02 | 3.78 | 0    | 0     | 0    | 0.51  | 0     | 0.02   |
| 320309 | '1520401A03Rik' | 0     | 0     | 0    | 0    | 0    | 2.59  | 0    | 0     | 0     | 0      |
| 320311 | 'Rnf152'        | 0.55  | 1.4   | 0.39 | 0.11 | 1.43 | 0.55  | 9.78 | 0.43  | 0.84  | 3.16   |
| 320332 | 'Hist4h4'       | 0     | 0     | 0    | 0    | 6.97 | 0.6   | 0    | 3.35  | 3.95  | 7.26   |
| 320333 | 'D830030K20Rik' | 10.75 | 8.21  | 9.72 | 24.9 | 19.8 | 18.38 | 5.52 | 22.67 | 15.7  | 11.7   |
| 320343 | 'Lypd6'         | 1.54  | 3.37  | 0.04 | 0    | 5.98 | 5.84  | 0.01 | 9.4   | 6.37  | 6      |
| 320351 | 'Tmem251'       | 11.06 | 31.58 | 44.9 | 49   | 27.7 | 25.46 | 60   | 15.17 | 38.39 | 10.31  |
| 320352 | 'Lrrc31'        | 0.25  | 0.29  | 0.41 | 1.08 | 0.23 | 0.41  | 0.42 | 0.3   | 0.29  | 0.32   |
| 320354 | 'Grin1os'       | 0     | 0     | 1.47 | 0    | 0.28 | 0     | 0    | 0.08  | 0.05  | 0.46   |
| 320360 | 'Ric3'          | 22.51 | 20.73 | 31   | 23.5 | 12.6 | 23.05 | 22.1 | 25.6  | 35.45 | 28.86  |
| 320365 | 'Fry'           | 3.36  | 2.75  | 5.75 | 6.37 | 2.48 | 5.58  | 3.31 | 2.96  | 7.66  | 5.22   |
| 320376 | 'Bcorl1'        | 0     | 0.05  | 2.12 | 0    | 0.01 | 0.71  | 1.09 | 0.05  | 0     | 1.15   |
| 320394 | 'Cenpt'         | 10.64 | 7.37  | 16.7 | 14.7 | 10.6 | 21.3  | 4.87 | 11.68 | 0.11  | 20.08  |
| 320398 | 'Lrig3'         | 0     | 0     | 0    | 0    | 0    | 0.17  | 0    | 0     | 0     | 0.17   |
| 320404 | 'ltpkb'         | 1.31  | 2.15  | 2.76 | 0.74 | 0.52 | 0.46  | 3.11 | 3.3   | 5.51  | 2.02   |
| 320405 | 'Cadps2'        | 0.79  | 4.31  | 7.35 | 6.29 | 1.28 | 19.2  | 17.6 | 6.97  | 1.61  | 2.1    |
| 320407 | 'Klri2'         | 0.03  | 0     | 0.01 | 0    | 0.04 | 0.01  | 0    | 0     | 0     | 0      |
| 320415 | 'Gchfr'         | 6.1   | 12.11 | 0.25 | 16.1 | 45.4 | 38.87 | 0    | 4.08  | 17.56 | 16.37  |
| 320429 | 'Trank1'        | 4.59  | 3.91  | 4.95 | 9.06 | 9.98 | 6.01  | 7.51 | 6.09  | 5.13  | 7.45   |

|        |                 |       |       |      |      |      |       |      |       |       |       |
|--------|-----------------|-------|-------|------|------|------|-------|------|-------|-------|-------|
| 320435 | 'Rinl'          | 0     | 0     | 0    | 0.02 | 1.92 | 5.85  | 2.12 | 1.59  | 0     | 3.8   |
| 320438 | 'Alg6'          | 9.99  | 6.1   | 5.37 | 2.5  | 5    | 3.97  | 5.54 | 6.93  | 1.77  | 6.5   |
| 320452 | 'P4ha3'         | 1.77  | 1.62  | 0    | 7.65 | 0    | 3.23  | 0.27 | 0.04  | 0     | 1.1   |
| 320454 | 'Tmprs11g'      | 0     | 0.02  | 0.02 | 0.02 | 0    | 0.02  | 0.05 | 0     | 0.01  | 0.03  |
| 320460 | 'Vwc2l'         | 2.07  | 7.98  | 10.2 | 9.67 | 0    | 0.32  | 0.01 | 2.95  | 7.49  | 1.7   |
| 320472 | 'Ppm1e'         | 1.87  | 0.23  | 0.01 | 2.05 | 1.51 | 1.57  | 1.84 | 0.25  | 0     | 0.46  |
| 320473 | 'Heatr5b'       | 3.14  | 0.2   | 1.76 | 0    | 0.31 | 4.88  | 0.33 | 1.57  | 2.58  | 4.75  |
| 320484 | 'Rasal3'        | 0     | 0     | 1.48 | 0    | 0    | 2.82  | 0    | 0.2   | 0     | 0     |
| 320487 | 'Heatr5a'       | 0.1   | 0.09  | 0.51 | 0.68 | 0.74 | 0     | 0.03 | 0.56  | 1.22  | 0.04  |
| 320492 | 'A830018L16Rik' | 5.7   | 0.92  | 2.34 | 6.67 | 3.67 | 12.95 | 5.3  | 8.09  | 23.89 | 5.36  |
| 320495 | 'Ipcef1'        | 4.4   | 1.58  | 1.09 | 0    | 0.45 | 1.24  | 0.02 | 0.91  | 4.37  | 0     |
| 320500 | 'Tmem215'       | 27.27 | 45.16 | 14.5 | 5.92 | 10.2 | 22.71 | 12.2 | 30.21 | 5.45  | 4.67  |
| 320502 | 'Lmod3'         | 0.02  | 0     | 0.05 | 0.03 | 0    | 0.02  | 0.02 | 0     | 0.37  | 0.04  |
| 320506 | 'Lmbrd2'        | 2.48  | 4.19  | 3.17 | 0.04 | 4.62 | 7.18  | 2.25 | 5.53  | 2.82  | 1.22  |
| 320508 | 'Cachd1'        | 0.57  | 2.08  | 5.03 | 0.64 | 0.03 | 1.12  | 6.21 | 2.14  | 0     | 2.84  |
| 320522 | 'Bhlha9'        | 0     | 7.46  | 0    | 0    | 0    | 3.23  | 0.13 | 0     | 0     | 13.08 |
| 320528 | 'Vps13c'        | 1.54  | 3.1   | 1.78 | 6.2  | 1.57 | 2.63  | 2.61 | 2.29  | 2.65  | 3.07  |
| 320534 | 'Tmem104'       | 8.42  | 4.43  | 5.72 | 7.63 | 1.19 | 4.62  | 7.01 | 3.85  | 6.23  | 5.59  |
| 320538 | 'Ubn2'          | 2.4   | 1.65  | 2.47 | 8.4  | 3.52 | 2.46  | 2.6  | 2.52  | 2.99  | 3.89  |
| 320541 | 'Slc35e2'       | 3.73  | 4.78  | 7.49 | 3.19 | 6.55 | 1.81  | 3.23 | 2.05  | 3.34  | 4.55  |
| 320554 | 'Tcp11l1'       | 0.31  | 0.16  | 1.12 | 2.18 | 0.45 | 1.91  | 0    | 0.02  | 3.89  | 0.47  |
| 320557 | 'Fam169a'       | 6.03  | 7.93  | 11.8 | 11   | 5.78 | 1.31  | 5.53 | 5.12  | 13.15 | 5.64  |
| 320558 | 'Sycp2'         | 0.04  | 0.8   | 0.05 | 2.18 | 0.16 | 0     | 0.01 | 0.02  | 0.24  | 0.03  |
| 320560 | 'Dennd5b'       | 5.75  | 4.12  | 4.24 | 4.09 | 2.52 | 2.58  | 1.62 | 1.83  | 4.66  | 3.41  |
| 320563 | 'Islr2'         | 2.12  | 0.94  | 2.41 | 0    | 7.48 | 3.1   | 7.29 | 3.26  | 1.83  | 2.27  |
| 320571 | 'Atp8b5'        | 0.56  | 0     | 0    | 0    | 2.42 | 0.25  | 0.01 | 0.11  | 0     | 1.33  |
| 320587 | 'Tmem88b'       | 1.85  | 4.83  | 1.04 | 2.7  | 10.4 | 3.93  | 1.02 | 3.41  | 0.78  | 0.89  |
| 320590 | 'Svopl'         | 0     | 0.33  | 0    | 0    | 0.25 | 0     | 0.02 | 0     | 0     | 0     |
| 320595 | 'Phf8'          | 2.82  | 3.13  | 5.88 | 2.07 | 0.65 | 3.1   | 0.21 | 2.5   | 3.27  | 2.18  |
| 320604 | 'Ccdc169'       | 0     | 0.04  | 0    | 0.04 | 0    | 0     | 0    | 0     | 0     | 0     |
| 320609 | 'Strip2'        | 6.21  | 6.66  | 2.94 | 5.59 | 0.94 | 0.02  | 0.15 | 17.62 | 0.42  | 0.4   |
| 320615 | 'Dop1a'         | 4.34  | 5.09  | 4.4  | 0.01 | 3.02 | 5.22  | 2.42 | 3.79  | 4.67  | 5.22  |
| 320632 | 'Snrrp200'      | 8.53  | 3.81  | 7.66 | 3.56 | 3.1  | 0.26  | 1.58 | 8.31  | 9.86  | 10.34 |
| 320633 | 'Zbtb26'        | 0.01  | 0.19  | 1.18 | 2.13 | 0.61 | 1.4   | 0.62 | 0.04  | 0.43  | 0.48  |
| 320634 | 'Ocr1'          | 15.77 | 6.34  | 21.6 | 6.61 | 4.26 | 0.36  | 20.3 | 13.11 | 15.32 | 10.54 |
| 320635 | 'Cyb5r2'        | 0.03  | 2.35  | 0.82 | 0    | 0    | 13.24 | 0    | 0.37  | 3.82  | 1.42  |
| 320640 | 'Skint4'        | 0     | 0.06  | 0.03 | 0.12 | 0.06 | 0.03  | 0.07 | 0.02  | 0.09  | 0.01  |
| 320655 | 'Pgap3'         | 2.68  | 2.01  | 0.09 | 0    | 0.83 | 0.02  | 0    | 1.2   | 0     | 0     |
| 320661 | 'D5Erttd579e'   | 4.54  | 2.28  | 5.71 | 7.09 | 4.31 | 5.11  | 2.21 | 2.15  | 2.01  | 3.99  |
| 320662 | 'Casc1'         | 0.02  | 0     | 0    | 0    | 0.79 | 0     | 0.02 | 0.01  | 0     | 0     |
| 320664 | 'Cass4'         | 0     | 0.41  | 0    | 0    | 0    | 0     | 0    | 0     | 1.4   | 0     |
| 320678 | 'Iffo1'         | 3.48  | 14.59 | 23.4 | 8.74 | 16.8 | 17.66 | 15.1 | 13.34 | 7.08  | 11.62 |
| 320679 | 'Samd12'        | 14.82 | 9.66  | 8.51 | 1.18 | 21.5 | 4.83  | 21.8 | 12.98 | 10    | 24.47 |
| 320683 | 'Zfp629'        | 1.28  | 0.22  | 2.24 | 0    | 2.06 | 0.02  | 7.05 | 0.15  | 5.04  | 0.69  |
| 320685 | 'Dctd'          | 0.62  | 3.12  | 8.09 | 0    | 3.64 | 0     | 2.83 | 1.69  | 2.06  | 0     |
| 320696 | 'Ccdc158'       | 0     | 0.07  | 0    | 0.07 | 0    | 0     | 0    | 0     | 0     | 0     |
| 320701 | 'Fam19a4'       | 0     | 12.71 | 10.8 | 0    | 0    | 0     | 0.02 | 0     | 0.02  | 0     |
| 320705 | 'Bend6'         | 12.1  | 19.79 | 25.6 | 15.5 | 16.6 | 25.85 | 21.4 | 25.64 | 53.25 | 9.42  |
| 320706 | 'Soga1'         | 1.77  | 2.05  | 1.9  | 2.88 | 0.56 | 0.8   | 0.76 | 1.36  | 0.06  | 0.62  |
| 320707 | 'Atp2b3'        | 6.2   | 3.68  | 13.5 | 2.92 | 7.66 | 9.48  | 6.23 | 6.6   | 11.49 | 11.28 |
| 320709 | 'Tmem117'       | 1.02  | 1.66  | 4.26 | 0    | 3.18 | 1.38  | 2.5  | 0.47  | 2.7   | 1.38  |
| 320712 | 'Abi3bp'        | 0.26  | 0.02  | 0.06 | 0.11 | 0    | 0     | 0    | 0     | 0     | 0     |
| 320713 | 'Mysm1'         | 4.44  | 2.61  | 5.21 | 7.35 | 15.7 | 13.64 | 1.54 | 10.96 | 7.23  | 24.12 |
| 320714 | 'Trappc11'      | 13.04 | 10.82 | 12.6 | 3.32 | 9.1  | 4.59  | 14.2 | 13.13 | 26.27 | 22.43 |
| 320717 | 'Pptc7'         | 8.28  | 3.23  | 4.37 | 13.5 | 11   | 5.16  | 7.95 | 6.83  | 6.47  | 5.08  |
| 320720 | 'Fastkd1'       | 1.65  | 3.7   | 4.24 | 0.04 | 4    | 4.79  | 3.35 | 5.53  | 0     | 4     |
| 320722 | 'Akain1'        | 1.87  | 0     | 14.2 | 0    | 1.09 | 0     | 5.03 | 1.81  | 1.47  | 4.24  |
| 320727 | 'lpo8'          | 10.09 | 8.84  | 4.74 | 7.5  | 5.65 | 1.88  | 7.65 | 1.64  | 18.71 | 6.17  |

|        |                 |       |       |      |      |      |       |      |       |       |        |
|--------|-----------------|-------|-------|------|------|------|-------|------|-------|-------|--------|
| 320736 | 'Vstm4'         | 2.53  | 0     | 0    | 1.15 | 0    | 0     | 0    | 0     | 2.51  | 0      |
| 320747 | 'Lingo4'        | 0     | 1.46  | 1.26 | 0    | 2.45 | 0     | 0.02 | 0     | 0     | 0      |
| 320752 | 'Dpy19l2'       | 0.89  | 0     | 0    | 0    | 0    | 0.67  | 0    | 0.35  | 0     | 0      |
| 320772 | 'Mdga2'         | 7.41  | 3.57  | 6.34 | 3.92 | 8.28 | 2.09  | 20.4 | 6.34  | 9.85  | 8.32   |
| 320782 | 'Tmem154'       | 1.31  | 0     | 0    | 0    | 0    | 0     | 0    | 0     | 3.8   | 0      |
| 320790 | 'Chd7'          | 0.47  | 0.62  | 1.07 | 0.48 | 0.98 | 0.8   | 2.63 | 0.67  | 0.8   | 0.84   |
| 320795 | 'Pkn1'          | 5.02  | 2.12  | 1.72 | 1.28 | 5.16 | 0.33  | 1.37 | 0     | 1.43  | 4.58   |
| 320799 | 'Zhx3'          | 1.32  | 2.06  | 1.83 | 4.12 | 0.02 | 0     | 0.08 | 0.98  | 1.49  | 0      |
| 320802 | 'Ifitm10'       | 29.57 | 14.67 | 47.1 | 12.5 | 26   | 23.78 | 21.9 | 30.57 | 32.23 | 11.83  |
| 320806 | 'Gfm2'          | 3.71  | 12.19 | 10.3 | 9.12 | 11.3 | 7.4   | 3.14 | 7.9   | 17.27 | 6.53   |
| 320808 | 'Dcaf5'         | 6.32  | 1.91  | 4.44 | 0.87 | 3.17 | 0.45  | 5.52 | 3.33  | 2.41  | 3.85   |
| 320816 | 'Ankrd16'       | 24.67 | 8.34  | 17.2 | 26.6 | 13.4 | 5.7   | 12   | 17.94 | 9.82  | 8.24   |
| 320817 | 'Atad2b'        | 0.75  | 0.93  | 0.3  | 1.36 | 0.27 | 0.73  | 1.84 | 0.57  | 1.06  | 0.59   |
| 320825 | 'Samd5'         | 3.45  | 0.3   | 6.67 | 4.37 | 2.07 | 5.1   | 0    | 0.64  | 3.25  | 2.52   |
| 320827 | 'C530008M17Rik' | 4.42  | 4.55  | 6.38 | 0.91 | 3.95 | 2.25  | 3.64 | 2.01  | 3.68  | 6.18   |
| 320840 | 'Negr1'         | 22.38 | 44.44 | 41.8 | 53   | 10.8 | 20.61 | 24.6 | 11.88 | 22.2  | 11.69  |
| 320844 | 'Amigo3'        | 0     | 0.49  | 0    | 0    | 0.48 | 0.02  | 0    | 0     | 4.05  | 1.37   |
| 320858 | 'L3mbtl4'       | 0     | 0     | 0.23 | 0    | 0    | 0     | 0    | 0     | 0     | 0      |
| 320865 | 'Cdh18'         | 8.01  | 6.15  | 10.5 | 2.26 | 10.1 | 3.66  | 24.5 | 7.35  | 31    | 10.67  |
| 320869 | 'Spata33'       | 11.14 | 9.79  | 4.93 | 0.02 | 2.59 | 7.01  | 2.52 | 3.04  | 0     | 9.64   |
| 320873 | 'Cdh10'         | 10.76 | 5.31  | 7.21 | 0.14 | 22   | 9.81  | 17.6 | 4.03  | 12.16 | 22.96  |
| 320878 | 'Mical2'        | 7.75  | 7.51  | 9.34 | 11.2 | 7.27 | 5.13  | 3.86 | 6.11  | 9.65  | 12.3   |
| 320910 | 'Itgb8'         | 1.29  | 0.45  | 1.51 | 0    | 2.33 | 0.12  | 1.66 | 2.1   | 0     | 2.33   |
| 320916 | 'Wscd2'         | 6.07  | 7.19  | 3.56 | 3.01 | 7.71 | 5.48  | 7.72 | 12.36 | 0.59  | 2.95   |
| 320923 | 'Map7d3'        | 0.03  | 0     | 0    | 0    | 0    | 0     | 0    | 0     | 0     | 0      |
| 320924 | 'Ccbe1'         | 0.01  | 0     | 0.77 | 0    | 0.74 | 0     | 0    | 0.03  | 0     | 0      |
| 320938 | 'Tnpo3'         | 14.2  | 26.48 | 14.3 | 30.5 | 8.07 | 8.63  | 12.5 | 17.88 | 24.52 | 29.07  |
| 320940 | 'Atp11c'        | 1.7   | 0.19  | 0.68 | 0    | 1.47 | 0     | 0.63 | 0.22  | 1.54  | 2.01   |
| 320951 | 'Pisd'          | 66.16 | 83.9  | 73.9 | 79   | 97.8 | 195.6 | 127  | 92.21 | 91.16 | 90.52  |
| 320974 | 'Lrrn4'         | 0     | 0.07  | 4.24 | 0    | 0    | 3.04  | 1.45 | 3.2   | 1.67  | 0.01   |
| 320981 | 'Enpp6'         | 0     | 0     | 0    | 0    | 5.12 | 0     | 0    | 0     | 0     | 0      |
| 320982 | 'Arl4c'         | 12.66 | 10.96 | 12.2 | 7.84 | 9.96 | 7.75  | 2.46 | 10.02 | 7.19  | 8.46   |
| 321000 | 'Lrif1'         | 18.74 | 12.46 | 10   | 7.38 | 8.97 | 6.38  | 16.6 | 9.74  | 17.39 | 16.24  |
| 321003 | 'Xpnpep3'       | 2.02  | 0.02  | 2.03 | 0.17 | 2.23 | 5.06  | 1.04 | 1.38  | 3.76  | 2.04   |
| 321006 | 'Dcaf1'         | 2.22  | 5.03  | 6.96 | 0.58 | 3.21 | 4.58  | 6.99 | 3.18  | 4.48  | 3.03   |
| 321007 | 'Serac1'        | 4.04  | 9.63  | 5.41 | 0    | 3.09 | 9.24  | 0.42 | 3.4   | 3.04  | 5.7    |
| 321008 | 'Zswim9'        | 3.69  | 4.26  | 1.65 | 0.03 | 3.23 | 0     | 0    | 6.44  | 0.01  | 1.78   |
| 321019 | 'Gpr183'        | 0.33  | 0     | 0    | 0    | 0    | 0     | 0    | 0     | 0     | 0      |
| 321022 | 'Cdv3'          | 124.7 | 135.8 | 73.3 | 44.4 | 105  | 135.5 | 95.1 | 113   | 86.38 | 107.62 |
| 326618 | 'Tpm4'          | 8.02  | 6.86  | 21.5 | 7.23 | 6.46 | 6.75  | 24.1 | 7.24  | 5.62  | 5.51   |
| 326622 | 'Upf2'          | 4.77  | 2.76  | 4.01 | 7.9  | 1.65 | 3.11  | 4.89 | 3.82  | 10.56 | 7.6    |
| 327655 | 'Ppip5k1'       | 11.06 | 11.17 | 14.8 | 19.7 | 9.96 | 4.82  | 11.8 | 5.5   | 15.98 | 13.31  |
| 327743 | 'Wisp3'         | 0     | 0.03  | 0    | 0    | 0    | 0     | 0    | 0     | 0.03  | 0      |
| 327747 | 'Mettl24'       | 2.66  | 1.83  | 3.51 | 0    | 7.7  | 0.9   | 0    | 0.81  | 4.08  | 1.86   |
| 327762 | 'Dna2'          | 0.01  | 0     | 0.63 | 0    | 0    | 0     | 1.03 | 0.54  | 0.59  | 0.54   |
| 327766 | 'Tmem26'        | 1.85  | 0.06  | 0.6  | 0    | 4.18 | 6.64  | 0.01 | 3.59  | 0.12  | 1.52   |
| 327799 | 'Usp44'         | 0.28  | 0     | 0    | 0.02 | 0    | 0     | 0.43 | 0     | 0     | 0      |
| 327814 | 'Ppfia2'        | 9.24  | 10.9  | 8.07 | 13.1 | 15.9 | 25.21 | 18.6 | 11.42 | 12.48 | 22.56  |
| 327826 | 'Frs2'          | 2.65  | 0.65  | 6.68 | 6.58 | 0.08 | 1.22  | 0.25 | 1.17  | 6.09  | 4.96   |
| 327900 | 'Ubt2'          | 0.17  | 0.78  | 5.76 | 4.03 | 2.25 | 0     | 0    | 1.62  | 0     | 2.63   |
| 327942 | 'Pigl'          | 1.69  | 9.08  | 9.63 | 5.07 | 1.68 | 0     | 3.22 | 0.85  | 0.13  | 8.71   |
| 327951 | 'Cyb5d1'        | 12.51 | 12.61 | 17.5 | 1.49 | 10.1 | 7.77  | 17.9 | 15.88 | 14.75 | 15.91  |
| 327954 | 'Dnah2'         | 0.09  | 0     | 0.31 | 0    | 0    | 0.81  | 0    | 0.07  | 0.39  | 1.35   |
| 327956 | 'Vmo1'          | 0     | 0     | 0    | 0    | 0    | 0     | 0    | 0     | 0     | 0.96   |
| 327958 | 'Pitpnm3'       | 3.33  | 1.57  | 3.38 | 0.88 | 2.21 | 2.03  | 0.15 | 0.42  | 1.28  | 2.47   |
| 327959 | 'Xaf1'          | 4.88  | 2.24  | 2.29 | 9.22 | 3.82 | 3.26  | 0.54 | 0.66  | 5.82  | 4.52   |
| 327978 | 'Slfn5'         | 0.97  | 2.03  | 1.52 | 3.32 | 1.56 | 1.72  | 1.02 | 0.72  | 5.75  | 1.25   |
| 327987 | 'Med13'         | 1.04  | 0.68  | 1.25 | 3.25 | 1.1  | 1.7   | 0.95 | 0.23  | 0.05  | 0.55   |

|        |                 |       |       |      |      |      |       |      |       |       |        |
|--------|-----------------|-------|-------|------|------|------|-------|------|-------|-------|--------|
| 327992 | 'Hsf5'          | 2.17  | 0.75  | 2.13 | 1.39 | 0.77 | 0     | 3.05 | 2.6   | 2.4   | 0.99   |
| 328019 | 'Spata32'       | 0     | 1.47  | 0    | 0    | 0.36 | 0     | 0.88 | 0     | 0     | 0      |
| 328035 | 'Fads6'         | 0.63  | 0.35  | 2.04 | 0    | 5.68 | 2.04  | 2.44 | 4.48  | 0     | 4.02   |
| 328092 | 'Dtd2'          | 33.7  | 31.85 | 33.3 | 33.7 | 41.3 | 26.83 | 31.5 | 49.53 | 37.19 | 31.85  |
| 328099 | 'Prps1l3'       | 15.01 | 7.41  | 5.71 | 3.88 | 4.88 | 2.41  | 2.43 | 9.47  | 12.69 | 12.31  |
| 328108 | 'Togaram1'      | 6.11  | 6.15  | 6.67 | 10.2 | 4.24 | 1.52  | 4.83 | 5.08  | 5.92  | 1.31   |
| 328110 | 'Prpf39'        | 16.68 | 21.93 | 18.7 | 10.3 | 19   | 20.85 | 34.9 | 22.89 | 18.23 | 52.6   |
| 328133 | 'Slc39a9'       | 9.51  | 10.67 | 17   | 5.75 | 12.4 | 8.45  | 7.14 | 8.83  | 15.52 | 18.12  |
| 328162 | 'Trmt61a'       | 6.27  | 6.47  | 7.46 | 0.03 | 8.97 | 9.39  | 6.7  | 8.14  | 16.43 | 3.92   |
| 328232 | 'Gfod1'         | 1.6   | 0     | 0.01 | 0.03 | 0.12 | 0     | 1.65 | 0.21  | 2.06  | 0.27   |
| 328234 | 'Rnf182'        | 1.82  | 5.11  | 3.39 | 0    | 1.56 | 5.55  | 6.77 | 4.02  | 2.91  | 2.3    |
| 328258 | 'Slc25a48'      | 0     | 0     | 0    | 0    | 0    | 0     | 0    | 0     | 0     | 3.23   |
| 328274 | 'Zfp459'        | 0.09  | 0.17  | 0.91 | 0.31 | 0.37 | 0.21  | 0.29 | 0.17  | 0.12  | 1.01   |
| 328329 | 'Mast4'         | 5.65  | 3.03  | 3.39 | 11.7 | 2.76 | 4.28  | 2.4  | 1.92  | 2.19  | 4.18   |
| 328330 | 'D130037M23Rik' | 0     | 0     | 0    | 0    | 0.75 | 0     | 0    | 0     | 0     | 0      |
| 328365 | 'Zmiz1'         | 1.37  | 5.25  | 3.85 | 15.7 | 2.6  | 3.84  | 5.94 | 4.21  | 2.36  | 3.05   |
| 328370 | 'Rft1'          | 8.11  | 2.77  | 6.15 | 6.27 | 9.33 | 0.43  | 13.7 | 7.59  | 9.59  | 4.13   |
| 328381 | 'Sh2d4b'        | 0     | 0.36  | 0.11 | 0    | 0    | 0     | 0    | 0     | 0     | 0      |
| 328417 | 'Parp4'         | 0.2   | 0     | 0    | 4.06 | 0.04 | 0.84  | 0.35 | 0     | 0.18  | 1.47   |
| 328424 | 'Kcnrg'         | 0.87  | 2.19  | 0    | 0    | 0    | 0     | 0    | 0     | 0     | 0      |
| 328440 | 'Npm2'          | 0.44  | 3.53  | 0    | 0.75 | 2.21 | 0     | 4.69 | 0.47  | 0.82  | 1.56   |
| 328561 | 'Apol10b'       | 0     | 3     | 0    | 0    | 0    | 0     | 0    | 0     | 2.42  | 0      |
| 328572 | 'Ep300'         | 3.11  | 2.46  | 2.79 | 0.01 | 1.84 | 2.1   | 3.05 | 1.34  | 0.91  | 1.9    |
| 328580 | 'Tubgcp6'       | 1.61  | 1.42  | 3.31 | 2.17 | 2.69 | 2.49  | 1    | 2.06  | 2.65  | 1.75   |
| 328643 | 'Vwa5b2'        | 6.9   | 7.38  | 15.6 | 0.97 | 13.1 | 2.22  | 3.66 | 5.78  | 4.61  | 2      |
| 328778 | 'Rab26'         | 105.7 | 61.56 | 47.8 | 143  | 114  | 125.2 | 28.9 | 120   | 102   | 113.05 |
| 328779 | 'Hs3st6'        | 3.53  | 0     | 0    | 0    | 0    | 0     | 0    | 0     | 0     | 0      |
| 328783 | 'Mslnl'         | 0     | 0     | 0.23 | 0    | 0    | 0     | 0    | 0     | 0     | 0      |
| 328789 | 'Lhfp15'        | 87.27 | 49.43 | 84.1 | 73.5 | 72.1 | 191.1 | 103  | 87.64 | 86.8  | 63.41  |
| 328801 | 'Zfp414'        | 36.47 | 48.97 | 37.2 | 67.4 | 56.2 | 92.15 | 77.3 | 66.64 | 51.58 | 47.34  |
| 328829 | '9830107B12Rik' | 0.02  | 0.02  | 0    | 0.04 | 0.02 | 0     | 0    | 0.01  | 0     | 0      |
| 328830 | 'A530064D06Rik' | 0     | 0     | 0    | 0.03 | 0    | 0     | 0    | 0     | 0.08  | 0      |
| 328845 | 'Acsbg2'        | 0     | 0     | 0    | 0.06 | 0    | 0     | 0    | 0     | 0     | 0      |
| 328918 | 'Zscan30'       | 2.05  | 0.23  | 1.98 | 0    | 0    | 0.96  | 0    | 2.11  | 0.41  | 0.45   |
| 328949 | 'Mcc'           | 0.8   | 0.38  | 1.22 | 3.85 | 0.52 | 0.21  | 0.07 | 0.19  | 0.43  | 0.13   |
| 328967 | 'Arhgef37'      | 2.13  | 1.74  | 2.86 | 3.3  | 2.11 | 1.26  | 0.92 | 0.94  | 1.36  | 1.16   |
| 328971 | 'Spink10'       | 1.28  | 9.22  | 0    | 0.12 | 5.22 | 0.04  | 2.76 | 0.07  | 0     | 0.38   |
| 328977 | 'Zfp532'        | 6.57  | 4.37  | 6.82 | 7.95 | 7.69 | 3.94  | 5.67 | 4.39  | 8.14  | 7.68   |
| 329002 | 'Zfp236'        | 1.27  | 1.66  | 2.4  | 2.44 | 2.03 | 2.63  | 4.45 | 2.89  | 3.43  | 0.37   |
| 329003 | 'Zfp516'        | 0.8   | 0.72  | 0.33 | 0    | 0.82 | 0.99  | 0.32 | 1.59  | 0.39  | 0.4    |
| 329015 | 'Atg2a'         | 4.4   | 4.86  | 5.16 | 10.3 | 5.71 | 10.04 | 6.26 | 2.06  | 7.31  | 4.91   |
| 329064 | 'Pkd2l1'        | 1.15  | 0     | 0    | 0    | 0    | 0     | 0    | 0     | 0     | 0      |
| 329065 | 'Scd4'          | 0.16  | 0.1   | 0.11 | 0.03 | 0.22 | 0.1   | 0.05 | 0.05  | 0.08  | 0.08   |
| 329152 | 'Hecw2'         | 0.16  | 0.83  | 3.41 | 0.8  | 2.24 | 0.35  | 0.33 | 0.02  | 2.19  | 1.58   |
| 329154 | 'Ankrd44'       | 0.97  | 0.9   | 2.59 | 3.17 | 0.08 | 0.01  | 4.6  | 0.04  | 0.03  | 0.78   |
| 329165 | 'Abi2'          | 14.31 | 13.63 | 18.1 | 10.2 | 15.2 | 9.46  | 23.7 | 9.21  | 9.34  | 15.32  |
| 329178 | 'Unc80'         | 3.45  | 3.79  | 2.96 | 2.86 | 4.54 | 3.72  | 6.69 | 3.3   | 3.99  | 3.59   |
| 329251 | 'Ppp1r12b'      | 5.82  | 2.29  | 4.72 | 9.7  | 2.35 | 3.17  | 1.26 | 2.68  | 1.2   | 4.54   |
| 329252 | 'Lgr6'          | 0     | 3.19  | 0.49 | 0.02 | 1.91 | 5     | 0    | 0.01  | 0.01  | 0.76   |
| 329260 | 'Dennd1b'       | 0.06  | 0.98  | 0.75 | 0    | 1.46 | 0.01  | 0    | 0.63  | 3.61  | 2.02   |
| 329274 | 'Fam163a'       | 0     | 0     | 0    | 0    | 6.5  | 0     | 0.01 | 0     | 0     | 0.17   |
| 329324 | 'Syt14'         | 1.07  | 3.29  | 2.76 | 0.69 | 2.48 | 3.86  | 0.7  | 0.88  | 1.94  | 0.83   |
| 329366 | 'Ccdc187'       | 3.43  | 0.08  | 1.31 | 0    | 3.08 | 0     | 0    | 0.83  | 0     | 0.75   |
| 329375 | 'Cfap77'        | 0.08  | 0.38  | 0.62 | 0    | 0    | 0     | 0    | 0     | 0     | 1.22   |
| 329384 | 'Ptrh1'         | 17.97 | 1.96  | 1.23 | 13.5 | 4.2  | 10.27 | 22.3 | 12.04 | 0     | 12.17  |
| 329416 | 'Nostrin'       | 0.15  | 0.05  | 0    | 0    | 0    | 6.15  | 0    | 3.63  | 1.03  | 0      |
| 329421 | 'Myo3b'         | 0     | 0.01  | 0    | 0    | 0.41 | 0     | 0    | 0     | 0     | 0      |
| 329470 | 'Accs'          | 3.66  | 1.52  | 4.7  | 10.7 | 1.24 | 0     | 5.51 | 2.4   | 0.89  | 0.91   |

|        |                 |       |       |      |      |      |       |      |       |       |       |
|--------|-----------------|-------|-------|------|------|------|-------|------|-------|-------|-------|
| 329482 | 'Dcdc5'         | 0     | 0     | 0.06 | 0    | 0    | 0     | 0    | 0     | 0     | 0     |
| 329502 | 'Pla2g4e'       | 3.01  | 1.2   | 5.12 | 1.86 | 0.14 | 4.98  | 2.88 | 6.16  | 2.35  | 6.24  |
| 329504 | 'Lcmt2'         | 7.05  | 21.06 | 7.05 | 26.4 | 4.39 | 7.83  | 19   | 6     | 6.9   | 14.02 |
| 329506 | 'Ctdspl2'       | 3.3   | 5.83  | 8.96 | 23.2 | 12.2 | 5.99  | 7.87 | 5.13  | 0.86  | 5.25  |
| 329509 | '1810024B03Rik' | 3.88  | 0     | 0    | 0    | 3.06 | 0     | 0.04 | 0     | 0     | 0     |
| 329540 | 'Nol4l'         | 1.94  | 2.45  | 2.72 | 0.2  | 0.57 | 4.62  | 2.07 | 0.27  | 1.93  | 0.09  |
| 329554 | 'Gm826'         | 0.04  | 0     | 0.06 | 0    | 0    | 0     | 0    | 0     | 0     | 0     |
| 329559 | 'Zfp335'        | 3.76  | 3.02  | 3.9  | 7.55 | 5.22 | 2.2   | 7.8  | 1.33  | 4.37  | 2.24  |
| 329575 | 'Gm14325'       | 2.55  | 1.81  | 3.37 | 1.18 | 2.52 | 2.05  | 0.89 | 2.69  | 1.75  | 3.5   |
| 329628 | 'Fat4'          | 0.54  | 0.1   | 0    | 0    | 0    | 0     | 0    | 0     | 0.08  | 0     |
| 329641 | 'Sertm1'        | 0.95  | 0     | 1.67 | 10.1 | 6.4  | 0     | 0    | 3.31  | 0.01  | 0     |
| 329650 | 'Med12l'        | 2.25  | 3.13  | 0.98 | 1.51 | 3.18 | 2.04  | 2.74 | 1.8   | 0.45  | 0.63  |
| 329659 | 'E130311K13Rik' | 4.93  | 8.17  | 6.79 | 10.3 | 9.93 | 9.76  | 5.19 | 6.24  | 7.95  | 7.81  |
| 329679 | 'Fnip2'         | 0.49  | 0.29  | 0.39 | 1.79 | 0.31 | 0.04  | 2.22 | 0.38  | 1.34  | 0.08  |
| 329693 | 'Fcr15'         | 0     | 0     | 0    | 0    | 0    | 0     | 0.12 | 0.02  | 0.05  | 0     |
| 329702 | 'Dcst2'         | 0     | 0     | 0    | 0    | 0.29 | 0     | 0    | 0.06  | 0     | 0     |
| 329731 | 'Fam19a3'       | 0     | 0.11  | 0    | 0    | 0    | 0     | 0    | 0     | 0     | 0.01  |
| 329738 | 'Aknad1'        | 0     | 2.89  | 0    | 0    | 0    | 0     | 0    | 0     | 0     | 0     |
| 329739 | 'Fam102b'       | 1     | 1.55  | 1.11 | 0.24 | 0.52 | 2.15  | 0.49 | 1.64  | 0.01  | 0.89  |
| 329777 | 'Pigk'          | 33.71 | 31.51 | 44.1 | 29.4 | 23.1 | 32.67 | 33.6 | 40.01 | 35.81 | 58.84 |
| 329795 | 'Tmem67'        | 3.71  | 13.11 | 7.5  | 13   | 15.9 | 3.26  | 9.77 | 7.95  | 1.81  | 11.52 |
| 329828 | 'Al464131'      | 7.07  | 4.71  | 5.41 | 0.5  | 0.02 | 4.33  | 0    | 0.99  | 2.36  | 0.69  |
| 329831 | 'Fam166b'       | 0     | 0     | 0    | 7.25 | 0    | 0     | 0    | 4.22  | 0     | 0.09  |
| 329872 | 'Frem1'         | 0     | 0     | 0.75 | 0    | 1.8  | 0     | 0    | 0     | 0     | 0.05  |
| 329877 | 'Dennd4c'       | 0.25  | 0.94  | 1.19 | 2.04 | 0.2  | 0     | 0    | 0.23  | 1.48  | 0.58  |
| 329908 | 'Usp24'         | 1.47  | 1.04  | 2.88 | 0.57 | 2.34 | 0.75  | 2.67 | 2.95  | 0.46  | 1.94  |
| 329910 | 'Acot11'        | 4.06  | 1.82  | 2.62 | 1.23 | 3.06 | 0.02  | 0.17 | 3.67  | 3.73  | 8.58  |
| 329934 | 'Foxo6'         | 0     | 1.82  | 0    | 1.12 | 2.92 | 0     | 0    | 1.16  | 0     | 0     |
| 329942 | 'Csmid2'        | 1.6   | 1.18  | 2.64 | 1.17 | 1.04 | 0.16  | 2.03 | 1.79  | 1.68  | 2.42  |
| 329954 | 'Catsper4'      | 0     | 0     | 0    | 0    | 0    | 0     | 0    | 0     | 0.03  | 1.06  |
| 329972 | 'Spata21'       | 0.03  | 0     | 0    | 0    | 0.1  | 0     | 0    | 0     | 0     | 0     |
| 329977 | 'Fhad1'         | 10.98 | 11.45 | 8.79 | 15.7 | 5.41 | 11.82 | 5.75 | 8.08  | 2.38  | 7.87  |
| 330010 | 'Till10'        | 0     | 0     | 0    | 0    | 0    | 0     | 0    | 0     | 0     | 0.98  |
| 330050 | 'Fam185a'       | 20.46 | 15.79 | 15   | 15.2 | 9.61 | 5.7   | 8.69 | 5.32  | 6.8   | 7.33  |
| 330064 | 'Slc5a6'        | 18.49 | 6.18  | 29.1 | 7.62 | 8.57 | 34.73 | 3.36 | 11.02 | 27.33 | 18.79 |
| 330097 | 'Gm5108'        | 0.18  | 0.19  | 0.29 | 0    | 0.6  | 0     | 0    | 0     | 0.35  | 0     |
| 330119 | 'Adamts3'       | 1.71  | 1.6   | 0.85 | 1.74 | 2.01 | 1.24  | 0.01 | 0.02  | 0     | 0     |
| 330149 | 'Hfm1'          | 0     | 3.1   | 0.02 | 0    | 3.06 | 0.17  | 0.7  | 2.46  | 3.52  | 0.56  |
| 330171 | 'Kctd10'        | 46.24 | 71.91 | 25.6 | 40.8 | 37.3 | 50.48 | 82.8 | 42.99 | 63.44 | 41.44 |
| 330173 | '2610524H06Rik' | 48.94 | 32.58 | 39   | 71.8 | 59.3 | 147.2 | 68.1 | 54.2  | 97.92 | 76.77 |
| 330177 | 'Taok3'         | 16.39 | 35.35 | 22.9 | 37.4 | 21.4 | 15.69 | 17.9 | 19.8  | 23.23 | 29.18 |
| 330188 | 'Ccadc63'       | 0     | 0     | 0    | 0    | 0.07 | 0     | 0    | 0     | 0     | 0     |
| 330189 | 'Tmem120b'      | 0.66  | 5.55  | 8.47 | 0.07 | 10.6 | 4.2   | 5.78 | 10.48 | 8.34  | 2.42  |
| 330192 | 'Vps37b'        | 4.1   | 15.85 | 8.51 | 16   | 5.38 | 9.63  | 2.87 | 1.43  | 6.84  | 3.93  |
| 330216 | 'Mblac1'        | 15.76 | 8.8   | 2.74 | 0.93 | 4.37 | 0     | 2.46 | 4.54  | 1.98  | 4.63  |
| 330217 | 'Gal3st4'       | 2.8   | 4     | 0.95 | 7.65 | 8.18 | 18.34 | 0    | 4.86  | 0.57  | 3.82  |
| 330222 | 'Sdk1'          | 0.57  | 0.89  | 0.51 | 1.73 | 0.9  | 0.01  | 0    | 0.33  | 1.36  | 0.02  |
| 330228 | 'Spdye4b'       | 0     | 0     | 0    | 0    | 0    | 0     | 0    | 0     | 0.69  | 0     |
| 330230 | 'Zfp853'        | 0     | 0     | 0    | 0    | 0    | 0     | 0    | 0.01  | 0     | 0.11  |
| 330260 | 'Pon2'          | 10.96 | 13.74 | 3.08 | 9.84 | 7.3  | 6.12  | 24.5 | 9.38  | 6.68  | 13.26 |
| 330267 | 'Thsd7a'        | 3.37  | 1.97  | 1.99 | 1.51 | 3.91 | 4.41  | 1.1  | 1.85  | 2.76  | 0.01  |
| 330286 | 'D630045J12Rik' | 1.11  | 2.16  | 2.04 | 2.07 | 2.32 | 1.25  | 3.19 | 1.26  | 1.19  | 0.53  |
| 330301 | 'Zfp786'        | 2.5   | 3.74  | 0    | 0.02 | 2    | 0     | 0    | 2.54  | 0     | 0     |
| 330305 | 'Gm5111'        | 0     | 0     | 0.62 | 0    | 3.97 | 4.75  | 0    | 0     | 0     | 0     |
| 330319 | 'Wipf3'         | 2.88  | 1.01  | 0.05 | 0.52 | 0.44 | 1.4   | 0.01 | 0.14  | 1.5   | 0.01  |
| 330323 | 'Mindy4'        | 0.02  | 7.38  | 1.37 | 0.01 | 7.82 | 5.37  | 0.06 | 4.95  | 2.16  | 3.86  |
| 330355 | 'Dnah6'         | 0     | 0     | 0.03 | 0    | 0.22 | 2.02  | 0    | 0     | 0     | 0     |
| 330361 | 'Gcfc2'         | 0.84  | 0     | 0.02 | 0    | 1.56 | 0     | 1.02 | 0     | 3.64  | 1.51  |



|        |                 |       |       |      |      |      |       |      |       |       |        |
|--------|-----------------|-------|-------|------|------|------|-------|------|-------|-------|--------|
| 330369 | 'Fbxo41'        | 1.34  | 3.63  | 1.89 | 4.46 | 3.94 | 3.91  | 0.67 | 4.22  | 2.23  | 2.68   |
| 330401 | 'Tmcc1'         | 3.67  | 4.87  | 2.66 | 9.72 | 4.24 | 3.44  | 1.87 | 2.87  | 1.41  | 5.83   |
| 330406 | 'B4galnt3'      | 0     | 0     | 0    | 0    | 0.49 | 0     | 0.02 | 0     | 0     | 0      |
| 330409 | 'Cecr2'         | 0     | 0.52  | 0.04 | 0    | 0.29 | 0     | 0    | 0     | 0     | 0      |
| 330440 | 'Sult6b2'       | 0     | 0     | 0    | 1.88 | 0    | 0     | 0    | 0     | 0     | 0      |
| 330450 | 'Far2'          | 19.03 | 9.12  | 17.2 | 14   | 6.35 | 6.45  | 11   | 11.92 | 16.95 | 8.18   |
| 330460 | 'Tmem150b'      | 0     | 0     | 0    | 0    | 0    | 0     | 0    | 0     | 0     | 1.12   |
| 330463 | 'Zfp78'         | 4.44  | 0.28  | 0.41 | 0.03 | 1.86 | 0.47  | 0.9  | 7.68  | 9.05  | 3.01   |
| 330474 | 'Zc3h4'         | 0.71  | 0.7   | 0.42 | 0.71 | 1.37 | 0.02  | 0.74 | 0.26  | 1.36  | 0.74   |
| 330483 | 'Ceacam16'      | 0.52  | 0     | 0    | 0    | 0    | 0     | 0    | 0.32  | 0     | 0      |
| 330485 | 'Tmem145'       | 17.08 | 17.61 | 32.2 | 14   | 23   | 8.18  | 29.9 | 18.37 | 51.53 | 4.57   |
| 330502 | 'Zfp82'         | 11.75 | 0.8   | 0.81 | 3.05 | 7.78 | 3.81  | 0    | 5.34  | 0     | 7.67   |
| 330554 | 'Fan1'          | 0     | 5.94  | 1.98 | 2.38 | 1.75 | 8.78  | 2.1  | 2.08  | 0.13  | 4.75   |
| 330577 | 'Saxo2'         | 5.9   | 7.49  | 0.91 | 5.46 | 3.07 | 3.72  | 0    | 2.89  | 4.93  | 3.49   |
| 330627 | 'Trim66'        | 2.64  | 1.42  | 0.58 | 0    | 4.26 | 1.65  | 1.42 | 1.06  | 1.9   | 0.72   |
| 330657 | 'Prss53'        | 1.19  | 0.8   | 0.36 | 0    | 0.26 | 0     | 1.48 | 0.02  | 0     | 3.67   |
| 330660 | 'Btbd16'        | 1.95  | 0.33  | 0.18 | 0.39 | 0.33 | 0.11  | 0.2  | 0.13  | 0.26  | 0.1    |
| 330662 | 'Dock1'         | 0.68  | 0.63  | 0.77 | 1.59 | 2    | 0.6   | 0.93 | 0.17  | 1.42  | 0.17   |
| 330671 | 'B4galnt4'      | 7.36  | 4.33  | 9.01 | 10.6 | 4.79 | 9.3   | 4.42 | 7.29  | 13.01 | 4.82   |
| 330695 | 'Ctxn1'         | 431.3 | 345.7 | 293  | 265  | 327  | 445.4 | 280  | 453.4 | 312.7 | 397.03 |
| 330721 | 'Nek5'          | 1.17  | 0     | 0    | 0    | 0    | 0     | 0    | 0.05  | 0     | 0      |
| 330723 | 'Htra4'         | 0     | 0     | 0    | 0    | 0    | 0.02  | 0    | 0     | 0     | 0      |
| 330788 | 'Zfp866'        | 2.39  | 0.48  | 1.08 | 1.98 | 9.8  | 3.38  | 3.64 | 5.08  | 3.11  | 8.69   |
| 330790 | 'Hapln4'        | 35.27 | 46.47 | 66.5 | 25.4 | 19.2 | 22.28 | 66.2 | 35.21 | 48.9  | 21.77  |
| 330812 | 'Rnf150'        | 1.06  | 1.39  | 1.25 | 0.47 | 0.89 | 0.23  | 0.21 | 0.81  | 1.52  | 0.25   |
| 330814 | 'Adgrl1'        | 9.81  | 10.95 | 13.5 | 18   | 17.3 | 8.98  | 13.1 | 10.98 | 17.32 | 5.01   |
| 330817 | 'Dhps'          | 78.96 | 38.2  | 94.8 | 30.1 | 80.1 | 103.8 | 26.7 | 63.31 | 60.25 | 71.29  |
| 330820 | '4933402J07Rik' | 0     | 1.8   | 0    | 0    | 0    | 0     | 0    | 0     | 0     | 0      |
| 330830 | 'Drc7'          | 0.95  | 4.36  | 1.31 | 3.84 | 2.54 | 1.87  | 0    | 1.65  | 0     | 0      |
| 330836 | 'Slc7a6'        | 6.96  | 10.19 | 17.5 | 8.64 | 7.95 | 2.73  | 8.25 | 15.87 | 10.76 | 15.12  |
| 330863 | 'Trim67'        | 0     | 0.36  | 0.69 | 0    | 0    | 0     | 0    | 0     | 0     | 0.98   |
| 330908 | 'Opcml'         | 13.42 | 20.2  | 38.6 | 21.6 | 30   | 19.67 | 22.6 | 11.7  | 13.38 | 8.34   |
| 330914 | 'Arhgap32'      | 1.83  | 4.49  | 0.53 | 1.25 | 1.18 | 2.87  | 2.01 | 1.9   | 1.15  | 1.09   |
| 330921 | 'Pate2'         | 0     | 0     | 0    | 0    | 2.4  | 0     | 0    | 0     | 0     | 0.98   |
| 330938 | 'Dixdc1'        | 10.92 | 8.68  | 6.96 | 9.26 | 6.16 | 5.72  | 13.5 | 6.36  | 3.79  | 4.3    |
| 330941 | 'Al593442'      | 36.99 | 11.81 | 11.5 | 25.1 | 30.9 | 13.51 | 14   | 21.26 | 45.52 | 29.29  |
| 330953 | 'Hcn4'          | 0.22  | 1.26  | 1.25 | 0    | 1.18 | 2.12  | 0    | 0     | 0     | 0      |
| 330959 | 'Snapc5'        | 35.47 | 25.85 | 24.8 | 37.7 | 29.2 | 55.31 | 42.3 | 38.24 | 61.4  | 48.15  |
| 330963 | 'Ankdd1a'       | 1.88  | 2.3   | 3.81 | 4.49 | 4.69 | 5.09  | 3.84 | 2.6   | 1.03  | 2.19   |
| 330998 | 'Ankrd34c'      | 3.03  | 0.9   | 4.01 | 0    | 4.48 | 1.22  | 0    | 4.74  | 0.48  | 2.24   |
| 331004 | 'Slc9a9'        | 1.65  | 0     | 2.72 | 0.29 | 7.59 | 1.22  | 0    | 2.62  | 2.18  | 1.43   |
| 331026 | 'Gmppb'         | 18.93 | 17.43 | 3.08 | 15.6 | 23.6 | 4.58  | 13.1 | 7.22  | 6.15  | 11.37  |
| 331046 | 'Tgm4'          | 0     | 0.04  | 0.03 | 0    | 0    | 0     | 0    | 0     | 0     | 0      |
| 331063 | 'Gsdmc2'        | 0     | 0     | 0.23 | 0    | 0    | 0.07  | 0    | 0     | 0     | 0      |
| 331188 | 'Zfp781'        | 8.82  | 5.54  | 6.59 | 5.35 | 2.53 | 6.57  | 6.01 | 4.83  | 1.34  | 5.6    |
| 331374 | 'Dgkk'          | 4.22  | 1.27  | 1.62 | 1.22 | 0.63 | 0.42  | 1.03 | 1.58  | 1.91  | 0.7    |
| 331401 | 'Thoc2'         | 11.17 | 6.65  | 8.95 | 10.2 | 7.78 | 4.33  | 14.6 | 7.47  | 8.38  | 9.77   |
| 331461 | 'Il1rapl1'      | 0.22  | 0.73  | 2.27 | 2.56 | 0.29 | 1.11  | 1.18 | 2.34  | 1.75  | 1.71   |
| 331474 | 'Rtl5'          | 5.75  | 4.07  | 3.75 | 1.07 | 6.25 | 8.52  | 1.75 | 1.52  | 8.1   | 7.75   |
| 331487 | 'Uprt'          | 0     | 0.58  | 3.61 | 0    | 0    | 0     | 0    | 0     | 0     | 0      |
| 331524 | 'Xkrx'          | 0.49  | 0.25  | 0.81 | 0.31 | 1.68 | 1.15  | 0.46 | 0.09  | 1.51  | 1.03   |
| 331532 | 'Tceal5'        | 57.91 | 58.48 | 71.3 | 34.8 | 42.4 | 30.39 | 42.4 | 46.67 | 55.36 | 32.5   |
| 331623 | 'Bend3'         | 0.39  | 0.02  | 0.02 | 0.17 | 0.03 | 0.03  | 0    | 0.02  | 0.73  | 1.48   |
| 332110 | 'Mapk15'        | 3.18  | 0.86  | 4.95 | 5.84 | 0    | 1.52  | 0    | 3.57  | 0     | 1.72   |
| 332131 | 'Krt78'         | 0     | 0     | 0    | 0    | 0    | 0     | 0    | 0     | 0     | 0.02   |
| 332175 | 'Zdhhc23'       | 0.67  | 0.49  | 0.56 | 2.14 | 0.1  | 0.13  | 2.26 | 0.92  | 0     | 0.24   |
| 332221 | 'Zscan10'       | 0     | 0     | 0    | 0    | 0    | 0     | 0    | 0     | 0     | 0.02   |
| 332359 | 'Tigd3'         | 0.01  | 0     | 2.23 | 0.19 | 3.06 | 2.76  | 0.17 | 1.95  | 5.11  | 0      |

|        |            |       |       |      |      |      |       |      |       |       |       |
|--------|------------|-------|-------|------|------|------|-------|------|-------|-------|-------|
| 332396 | 'Kcnk18'   | 0     | 0     | 0    | 0    | 0    | 0     | 0    | 0     | 0     | 0.35  |
| 332397 | 'Nanos1'   | 1.06  | 1.33  | 0.68 | 1.06 | 4.18 | 3.68  | 3.64 | 1.57  | 2.42  | 3.22  |
| 332579 | 'Card9'    | 0.05  | 0     | 4.14 | 0    | 1.44 | 3.75  | 0    | 3.1   | 0     | 0.28  |
| 332713 | 'Fndc11'   | 4.21  | 6.05  | 4.62 | 0    | 0    | 0     | 0    | 0     | 4.84  | 3.91  |
| 332934 | 'Zmynd12'  | 0.59  | 0     | 0    | 0    | 0.37 | 0.13  | 0    | 0     | 0     | 0.28  |
| 332937 | 'Tfap2e'   | 0     | 0     | 0.05 | 0    | 0    | 0     | 0    | 0     | 0     | 0     |
| 333048 | 'Tmem211'  | 0.01  | 0     | 0.01 | 0    | 3.14 | 0     | 0    | 0     | 0     | 0     |
| 333050 | 'Ksr2'     | 1.69  | 1.47  | 3.07 | 2.1  | 0.79 | 2.1   | 1.75 | 0.85  | 2.63  | 1.23  |
| 333088 | 'Kcp'      | 0     | 0     | 0.46 | 0    | 0.26 | 0.08  | 1.49 | 0.32  | 0.85  | 0.71  |
| 333182 | 'Cox6b2'   | 2.93  | 0     | 3.24 | 0    | 3.58 | 18.97 | 6.15 | 0     | 3.63  | 4.7   |
| 333193 | 'Proser3'  | 2.73  | 2.97  | 0.73 | 1.18 | 0.02 | 2.26  | 3.94 | 0     | 4.05  | 0.56  |
| 333315 | 'Frem3'    | 0     | 1.08  | 0    | 1.87 | 0    | 0     | 0    | 1.75  | 0     | 0     |
| 333329 | 'Cngb1'    | 3.91  | 2.91  | 0.97 | 0    | 3.74 | 1.35  | 0.03 | 4.05  | 3.25  | 9.04  |
| 333433 | 'Gpd1l'    | 10.96 | 17.55 | 20.7 | 8.88 | 11.4 | 4.98  | 26.5 | 16.06 | 12.13 | 6.88  |
| 333605 | 'Frmprd4'  | 0.51  | 0.64  | 3.32 | 1.82 | 0.51 | 2.26  | 0.31 | 1.42  | 2.85  | 0.65  |
| 333639 | 'Mamld1'   | 10.36 | 9.34  | 10.6 | 10.4 | 1.75 | 0.99  | 5.89 | 1.88  | 5.09  | 6.12  |
| 333654 | 'Ppp1r13l' | 0.38  | 0.02  | 0.07 | 3.56 | 0.02 | 0     | 0.24 | 0.29  | 0     | 0.4   |
| 333669 | 'Gm5134'   | 0     | 0     | 0    | 0    | 2.29 | 0     | 0    | 0     | 0     | 0     |
| 333670 | 'Gm867'    | 0.32  | 0     | 0    | 0.67 | 0.36 | 0.46  | 0    | 2.92  | 0.12  | 0     |
| 333715 | 'H2-M10.2' | 0.83  | 0.3   | 0    | 0    | 0    | 0     | 0    | 0     | 0     | 0     |
| 333789 | 'N4bp2'    | 5.8   | 2.79  | 2.36 | 5.31 | 0.5  | 0.01  | 1.54 | 0.97  | 1.98  | 4.71  |
| 333883 | 'Cd59b'    | 2.51  | 0.44  | 1.42 | 2.56 | 0.77 | 3.4   | 0.04 | 3.29  | 0.56  | 0.94  |
| 338337 | 'Cog3'     | 6.1   | 5.2   | 1.4  | 2.34 | 3.6  | 0     | 17.6 | 3.02  | 6     | 6.27  |
| 338346 | 'Gpr21'    | 0     | 0.81  | 0    | 0    | 0.02 | 0     | 5.22 | 0     | 2.05  | 1.07  |
| 338348 | 'Ttc16'    | 0.59  | 1.41  | 0.38 | 0    | 0    | 0     | 1.08 | 1.15  | 0     | 0     |
| 338349 | 'Cntln'    | 0.43  | 1.01  | 0.12 | 5.65 | 1.47 | 0.09  | 2.96 | 0.36  | 1.57  | 1.15  |
| 338350 | 'Acad12'   | 0     | 0     | 0    | 0    | 0.5  | 0     | 0    | 0     | 0.02  | 0     |
| 338351 | 'Akap17b'  | 8.22  | 6.08  | 6.13 | 11.9 | 7.8  | 3.46  | 6.24 | 9.62  | 2.08  | 10.38 |
| 338352 | 'Nell1'    | 76.4  | 10.24 | 40.1 | 41.6 | 16.4 | 13.38 | 10.8 | 93.88 | 101.4 | 79.97 |
| 338354 | 'Zfp780b'  | 4.4   | 5.56  | 4.35 | 1.19 | 6.71 | 2.59  | 5.55 | 5.5   | 4.24  | 10.03 |
| 338355 | 'Fkbp15'   | 5.24  | 2.95  | 17.9 | 2.74 | 6.46 | 0.38  | 2.14 | 2.9   | 7.19  | 4.52  |
| 338359 | 'Supv3l1'  | 5.85  | 7.4   | 6.89 | 2.48 | 5.03 | 4.4   | 6.1  | 7.88  | 3.95  | 12.48 |
| 338362 | 'Ust'      | 0     | 0.99  | 0.08 | 0    | 0.01 | 0     | 8.73 | 1.65  | 0.09  | 0     |
| 338363 | 'Tmem241'  | 6.36  | 14.5  | 13.8 | 8.33 | 3.83 | 14.73 | 11.7 | 8.71  | 16.33 | 18.84 |
| 338364 | 'Trim65'   | 0.67  | 1.15  | 3.4  | 0.18 | 0    | 4.37  | 5.92 | 0     | 0     | 0.58  |
| 338365 | 'Slc41a2'  | 11.53 | 2.86  | 2.76 | 2.28 | 2.67 | 2.34  | 0.04 | 5.44  | 6.85  | 1.47  |
| 338366 | 'Mia3'     | 8.53  | 11.56 | 16   | 14.5 | 13.4 | 9.21  | 8.74 | 9.06  | 11.05 | 16.57 |
| 338367 | 'Myo1d'    | 0.03  | 0.03  | 0.06 | 0    | 2.68 | 1.98  | 5.4  | 1.62  | 0     | 1.28  |
| 338368 | 'Pheta2'   | 0     | 0     | 0    | 0    | 0    | 0     | 0    | 0     | 0     | 0.02  |
| 338369 | 'Tmem220'  | 0     | 0     | 0    | 0    | 0    | 0     | 0    | 0     | 0     | 0.27  |
| 338370 | 'Nalcn'    | 4.42  | 8.64  | 12.7 | 2.98 | 7.64 | 0.47  | 5.35 | 6.96  | 10.44 | 9.06  |
| 338371 | 'Endov'    | 6.12  | 2.08  | 2.97 | 20.3 | 10.3 | 10.47 | 0.13 | 10.57 | 9.93  | 7.91  |
| 338372 | 'Map3k9'   | 0.11  | 0.23  | 0.9  | 0    | 1.03 | 0.25  | 0.64 | 0.59  | 0.64  | 2.04  |
| 338403 | 'Cndp1'    | 0     | 0     | 1.6  | 0    | 0    | 0     | 0    | 0     | 0     | 0     |
| 338417 | 'Scgb1c1'  | 0.12  | 0     | 0    | 0    | 0    | 0.12  | 0    | 0     | 0.11  | 0     |
| 338467 | 'Morc3'    | 12.35 | 11.64 | 6.24 | 2.09 | 9.31 | 1.96  | 5.83 | 7.53  | 3.04  | 9.92  |
| 338521 | 'Fa2h'     | 3.08  | 7.79  | 3.9  | 0    | 4.09 | 16.83 | 7.92 | 2.85  | 2.48  | 0     |
| 338523 | 'Kdm7a'    | 0.17  | 0.86  | 1    | 2.92 | 0.65 | 0.32  | 1.2  | 0.88  | 0.41  | 0.4   |
| 347710 | 'Pramel4'  | 0.03  | 0     | 0.06 | 0    | 0.06 | 0     | 0    | 0.02  | 0.03  | 0     |
| 347722 | 'Agap1'    | 2.11  | 5.27  | 3.26 | 5.81 | 4.23 | 4.98  | 2.55 | 2.38  | 3.26  | 4.55  |
| 353047 | 'Plekhh1'  | 2.19  | 0     | 0.5  | 0    | 3.64 | 0.08  | 3.71 | 3.04  | 1.62  | 1.59  |
| 353155 | 'Gjd3'     | 0     | 0.24  | 1.81 | 0    | 1.3  | 1.39  | 0    | 0.5   | 1.14  | 0     |
| 353156 | 'Egfl7'    | 35.5  | 47.17 | 31.7 | 82.9 | 39.6 | 38.15 | 2.41 | 66.35 | 54.93 | 39.2  |
| 353169 | 'Slc2a12'  | 0     | 1.06  | 2.78 | 0    | 0    | 0.12  | 0.07 | 1.62  | 0.01  | 0.02  |
| 353170 | 'Txlng'    | 9.18  | 10.47 | 6.7  | 9.37 | 5.83 | 4.24  | 5.12 | 6.12  | 4.71  | 14.57 |
| 353172 | 'Gars'     | 68.82 | 53.31 | 94.2 | 39.8 | 42.4 | 57.66 | 111  | 83.85 | 69.69 | 72.42 |
| 353187 | 'Nr1d2'    | 19.07 | 8.5   | 21.6 | 14.8 | 11.2 | 2.41  | 25.5 | 5.7   | 17.06 | 12.72 |
| 353190 | 'Edc3'     | 17.95 | 3.73  | 16.6 | 1.88 | 16.8 | 5.66  | 6.44 | 6.51  | 10.58 | 15.14 |

|        |            |       |       |      |      |      |       |      |       |       |        |
|--------|------------|-------|-------|------|------|------|-------|------|-------|-------|--------|
| 353208 | 'Zfp931'   | 1.55  | 3.51  | 0.82 | 1.14 | 3.36 | 2.1   | 0.69 | 3.15  | 0.54  | 1.94   |
| 353211 | 'Prune2'   | 35.18 | 21.7  | 22.4 | 48.8 | 52.7 | 37.86 | 16.4 | 37.74 | 29.97 | 50.88  |
| 353234 | 'Pcdha2'   | 1.98  | 4.93  | 6.68 | 0.13 | 0.08 | 0.01  | 0    | 3.42  | 0     | 0.03   |
| 353235 | 'Pcdha8'   | 0     | 0     | 2.34 | 8    | 0    | 0     | 0    | 0.31  | 0     | 0      |
| 353236 | 'Pcdhac1'  | 0.6   | 2.19  | 0.02 | 0.13 | 0.51 | 0     | 0    | 0     | 0     | 0.27   |
| 353237 | 'Pcdhac2'  | 1.67  | 4.95  | 2.24 | 11   | 3.76 | 5.26  | 6.53 | 2.85  | 1.71  | 0      |
| 353242 | 'Mrpl21'   | 62.04 | 59.96 | 58.3 | 51.6 | 74.3 | 78.09 | 88.5 | 74.48 | 84.06 | 68.92  |
| 353258 | 'Ltv1'     | 24.56 | 11.42 | 7.55 | 19.2 | 9.2  | 19.76 | 11.1 | 17.75 | 14.02 | 23.2   |
| 353282 | 'Sfmbt2'   | 0.27  | 1.95  | 1.28 | 0    | 1.92 | 5.3   | 0.04 | 0.19  | 0.04  | 0.01   |
| 353287 | 'Clec18a'  | 0.02  | 0     | 0.48 | 0    | 0    | 0     | 32.6 | 0     | 0     | 4.76   |
| 353310 | 'Zfp703'   | 1.47  | 1.69  | 0.57 | 1.63 | 0    | 0     | 0    | 0.17  | 0     | 0      |
| 353326 | 'Rtl1'     | 3.92  | 1.15  | 1.6  | 2.28 | 4.38 | 1.48  | 2.24 | 1.72  | 5.95  | 3.25   |
| 353328 | 'Muc6'     | 0     | 0.32  | 0    | 0    | 0    | 0     | 0    | 0     | 0     | 0.81   |
| 353344 | 'Opn5'     | 0     | 0     | 0.03 | 0    | 0    | 0     | 0    | 0.02  | 24.95 | 22.81  |
| 353371 | 'Oxct2b'   | 0.96  | 1.64  | 0    | 0    | 0.39 | 0.5   | 1.19 | 0.88  | 1.84  | 2.18   |
| 353499 | 'Tmc4'     | 6.53  | 3     | 6.87 | 5.42 | 0.36 | 1.09  | 0.68 | 4.31  | 2     | 3.53   |
| 353502 | 'Hcfc1r1'  | 136.5 | 125.6 | 153  | 125  | 154  | 145.2 | 92   | 83.37 | 94.6  | 119.6  |
| 360013 | 'Myo18a'   | 5.15  | 5.63  | 5.35 | 6.69 | 2.51 | 3.83  | 7.6  | 1.87  | 2.37  | 4.2    |
| 360198 | 'Hist1h3a' | 0.1   | 1.93  | 0.12 | 0    | 0    | 6.14  | 0    | 0     | 0     | 0      |
| 360213 | 'Trim46'   | 24.84 | 31.33 | 33.7 | 15.7 | 23.5 | 28.2  | 35.9 | 17.19 | 10.34 | 15.23  |
| 360216 | 'Zranb1'   | 8.58  | 12.41 | 7.13 | 22.2 | 6.36 | 8.43  | 3.05 | 8.19  | 3.33  | 6.69   |
| 360220 | 'Speer4d'  | 0     | 0     | 0    | 0    | 0    | 0.17  | 0    | 0     | 3.69  | 0      |
| 368203 | 'Gm5136'   | 0     | 0     | 0    | 0    | 11.9 | 0     | 6.18 | 3.25  | 0     | 0      |
| 373864 | 'Col27a1'  | 0     | 0     | 0.02 | 0.09 | 0    | 0     | 0    | 0     | 0     | 0      |
| 378430 | 'Nanos2'   | 0     | 0     | 1.56 | 0    | 0    | 0     | 0    | 6.25  | 0     | 0      |
| 378431 | 'Txlnb'    | 0.02  | 0     | 0.02 | 0    | 0.01 | 0.01  | 0    | 0.02  | 0.02  | 0.02   |
| 378460 | 'Pram1'    | 0     | 0.04  | 0    | 0    | 0.09 | 0.02  | 0    | 0     | 0     | 0      |
| 378462 | 'Morn2'    | 80.09 | 133.9 | 55.9 | 75.1 | 126  | 94.86 | 40.4 | 79.54 | 86.55 | 84.18  |
| 378700 | 'Bpifb3'   | 0     | 0     | 0.03 | 0    | 0.03 | 0     | 0    | 1.54  | 0     | 0.57   |
| 378702 | 'Serf2'    | 41.41 | 43.82 | 46   | 44.4 | 62.5 | 72.96 | 56.3 | 38.32 | 33.54 | 56.05  |
| 378937 | 'Lrrc24'   | 45.55 | 30.2  | 47.5 | 18.7 | 44   | 27    | 58.7 | 63.24 | 28.05 | 29.08  |
| 380601 | 'Fastkd5'  | 7.17  | 4.36  | 0    | 0.11 | 3.45 | 0     | 4.06 | 2.4   | 2.32  | 2.54   |
| 380608 | 'Tagap1'   | 38    | 47.44 | 32   | 46.9 | 36.2 | 18.08 | 27   | 22.56 | 22.44 | 36.91  |
| 380614 | 'Intu'     | 2     | 2.87  | 2.11 | 5.08 | 5.12 | 2.1   | 3.55 | 2.54  | 3.5   | 3.09   |
| 380629 | 'Heca'     | 0.25  | 1.36  | 0.62 | 0    | 0    | 0.22  | 3.58 | 0.03  | 0.04  | 2.81   |
| 380654 | 'Cfap54'   | 0.87  | 0.39  | 1.83 | 0.08 | 1.29 | 1.13  | 0.34 | 0.47  | 0.63  | 0.6    |
| 380660 | 'Acss3'    | 3.58  | 0     | 0    | 0    | 0    | 0     | 0    | 0     | 0     | 1.24   |
| 380664 | 'Lemd3'    | 0.58  | 0.61  | 2.42 | 1.96 | 0.22 | 0.83  | 0    | 0.34  | 1.45  | 1.72   |
| 380669 | 'Lin28b'   | 1.21  | 0     | 0.07 | 0.04 | 0.84 | 1.96  | 2.01 | 0.72  | 3.12  | 0.74   |
| 380683 | 'Sec14l3'  | 3.36  | 5.83  | 4.26 | 15.2 | 3.6  | 2.18  | 0.6  | 0.24  | 0.01  | 3.22   |
| 380684 | 'Nefh'     | 1.77  | 0     | 5.62 | 13.9 | 11.8 | 1.29  | 5.14 | 1.85  | 4.04  | 3.24   |
| 380686 | 'Cnrip1'   | 147.6 | 113.1 | 95.5 | 182  | 90.6 | 125.6 | 87.7 | 119.7 | 117.3 | 128.32 |
| 380694 | 'Ccnjl'    | 0     | 3.47  | 1.87 | 0    | 0    | 0.02  | 0.2  | 0     | 0     | 0      |
| 380698 | 'Obscn'    | 0.01  | 0     | 0.02 | 0    | 0.01 | 0.01  | 0.01 | 0     | 0.01  | 0.01   |
| 380702 | 'Shisa6'   | 1.22  | 0     | 0.62 | 0    | 0.01 | 0     | 0    | 0.11  | 1.05  | 0.23   |
| 380705 | 'Tmem102'  | 0     | 0     | 0    | 0    | 1.02 | 0     | 0    | 0     | 0     | 0      |
| 380711 | 'Rap1gap2' | 5.08  | 7.85  | 19.1 | 2.5  | 1.6  | 6.07  | 8.53 | 3.88  | 10.08 | 2.2    |
| 380712 | 'Tlcd2'    | 0     | 1.89  | 0    | 4.45 | 0    | 0     | 0    | 0     | 0     | 0      |
| 380713 | 'Scarf1'   | 0     | 0     | 0    | 0    | 0    | 0     | 0    | 0     | 0.18  | 0      |
| 380714 | 'Rph3al'   | 2.9   | 9.21  | 1.78 | 6.89 | 7.64 | 4.39  | 5.11 | 5.09  | 0.02  | 1.1    |
| 380718 | 'Mks1'     | 5.18  | 8.11  | 14.2 | 2.64 | 7.8  | 3.82  | 0.23 | 10.74 | 3.86  | 11.96  |
| 380728 | 'Kcnh4'    | 1.63  | 0.46  | 0.13 | 0.18 | 0.08 | 0.02  | 0.14 | 0     | 2.1   | 0.01   |
| 380732 | 'Milr1'    | 0     | 0     | 0.6  | 0    | 0.07 | 0.03  | 1.96 | 0.38  | 0.55  | 0      |
| 380752 | 'Eipr1'    | 78.44 | 63.47 | 58.3 | 62.3 | 57.3 | 64.71 | 27.6 | 74.37 | 85.17 | 38.48  |
| 380753 | 'Atxn7l1'  | 43.28 | 38.38 | 28.8 | 18.4 | 9.71 | 54.25 | 19   | 46.29 | 24.61 | 28.8   |
| 380755 | 'Lsmem1'   | 0     | 0     | 0.93 | 8.63 | 0.04 | 6.34  | 0    | 0     | 0     | 0.07   |
| 380768 | 'Ccadc177' | 0.43  | 1.7   | 0    | 0    | 0.55 | 0.01  | 0    | 0.69  | 0     | 1.17   |
| 380773 | 'Slirp'    | 209.2 | 277.5 | 271  | 295  | 231  | 351.9 | 237  | 180   | 403.8 | 201.06 |

|        |                 |       |       |      |      |      |       |      |       |       |        |
|--------|-----------------|-------|-------|------|------|------|-------|------|-------|-------|--------|
| 380785 | 'Begain'        | 7.81  | 12.13 | 21.2 | 30.2 | 12.3 | 18.62 | 18.8 | 11.71 | 24.92 | 9.81   |
| 380787 | 'Lbhd2'         | 91.32 | 93.31 | 138  | 155  | 79.6 | 142.4 | 21.5 | 160.7 | 128.4 | 222.05 |
| 380836 | 'Mrs2'          | 3.48  | 5.1   | 16   | 5.28 | 3.98 | 5.19  | 4.17 | 1.42  | 8.26  | 2.29   |
| 380840 | 'Lyrn4'         | 99.42 | 109.9 | 119  | 221  | 139  | 128.8 | 149  | 90.35 | 125.5 | 127.58 |
| 380850 | 'Gm5141'        | 1.82  | 1.04  | 4.64 | 0.1  | 0.05 | 0.01  | 0    | 1.89  | 4.51  | 1.64   |
| 380855 | 'Rsl1'          | 0.95  | 0     | 2.64 | 0    | 0    | 7.44  | 0    | 0     | 7.8   | 0.25   |
| 380882 | 'Gm906'         | 0     | 0.02  | 0    | 0    | 0    | 0     | 0    | 0     | 0     | 0      |
| 380912 | 'Zfp395'        | 1.89  | 0.78  | 2.17 | 4.29 | 2.91 | 3.72  | 4.01 | 1.09  | 1.16  | 1.1    |
| 380916 | 'Lrch1'         | 9.64  | 9.31  | 13   | 16.2 | 6.84 | 1.47  | 6.15 | 4.47  | 10.85 | 2.32   |
| 380918 | 'Siah3'         | 0.61  | 0.78  | 5.55 | 13   | 0.17 | 0     | 0    | 0.37  | 0     | 0      |
| 380921 | 'Dgkh'          | 3.56  | 3.72  | 2.34 | 5.04 | 1.28 | 1.49  | 8.2  | 2.8   | 0.61  | 1.78   |
| 380924 | 'Olfm4'         | 0     | 0     | 4.66 | 0    | 0    | 0     | 0    | 0     | 0     | 0      |
| 380928 | 'Lmo7'          | 0.62  | 0.65  | 0.21 | 0.01 | 0.09 | 0.02  | 0.01 | 0.07  | 0.74  | 0.01   |
| 380959 | 'Alg10b'        | 5.83  | 5.74  | 1.93 | 7.08 | 3.68 | 0.46  | 6.05 | 3.62  | 11.19 | 0.35   |
| 380967 | 'Tmem106c'      | 88.81 | 92.32 | 98.8 | 91.2 | 73.2 | 83.89 | 76   | 81.42 | 102.5 | 110.54 |
| 380969 | 'Nckap5l'       | 1.78  | 1.67  | 2.88 | 0    | 0.03 | 1.4   | 1.96 | 0.34  | 0.8   | 2.23   |
| 380993 | 'Zfat'          | 0     | 1.4   | 0.41 | 1.62 | 0    | 0.03  | 0.29 | 0.41  | 0.06  | 0.08   |
| 380997 | 'Cyp2d12'       | 0.1   | 0     | 0    | 0    | 0    | 0     | 0    | 0     | 0     | 0      |
| 381022 | 'Kmt2d'         | 5.12  | 4.16  | 3.55 | 2.65 | 7.55 | 1.94  | 3.93 | 4.45  | 7.27  | 6.64   |
| 381038 | 'Parl'          | 31.88 | 56.65 | 44.4 | 104  | 53   | 43.86 | 18.1 | 45.88 | 56.07 | 46.55  |
| 381045 | 'Ccdc58'        | 6.64  | 8.44  | 14.3 | 1.84 | 7.95 | 8.04  | 6.23 | 7.13  | 1.94  | 8.75   |
| 381058 | 'Unc93a'        | 0     | 0.05  | 0    | 0    | 0    | 0     | 0    | 0     | 0     | 0      |
| 381059 | 'Gm1604b'       | 10.31 | 11.36 | 13.1 | 8.06 | 22.7 | 10.34 | 11.6 | 14.8  | 3.92  | 16.64  |
| 381062 | 'Ermard'        | 14.28 | 11.18 | 13.3 | 3.07 | 8.2  | 9.25  | 13.4 | 13.91 | 3.94  | 18.23  |
| 381066 | 'Zfp948'        | 28.26 | 18.2  | 7.42 | 6.02 | 24.5 | 24.12 | 16.7 | 13.73 | 21.96 | 4.64   |
| 381067 | 'Zfp229'        | 2.61  | 0.21  | 0.03 | 2.61 | 0.31 | 1.14  | 0    | 0.5   | 2.98  | 0.18   |
| 381072 | 'Abca17'        | 0.54  | 0.15  | 0    | 0    | 0    | 0     | 0    | 0.22  | 1.58  | 0      |
| 381077 | 'Ccdc78'        | 0.6   | 0.32  | 1.7  | 0.38 | 0.12 | 0.16  | 0.89 | 0.08  | 0.11  | 0.16   |
| 381085 | 'Tbc1d22b'      | 1.06  | 2.6   | 3.65 | 8.56 | 2.88 | 3.86  | 2.32 | 5.8   | 5.25  | 3.54   |
| 381101 | 'Dnph1'         | 4.52  | 14.26 | 8.82 | 17   | 5.36 | 0     | 12.9 | 8.26  | 5.41  | 2.59   |
| 381104 | 'Prickle4'      | 5.03  | 5.54  | 5.14 | 5.57 | 5.22 | 2.65  | 1.21 | 4.81  | 1.34  | 3.69   |
| 381107 | 'Tmem232'       | 0.38  | 0     | 0    | 0    | 0    | 0     | 0    | 0     | 0     | 0      |
| 381110 | 'Rmdn2'         | 8.73  | 4.5   | 0.74 | 14.1 | 6.98 | 2.22  | 4.48 | 2.75  | 0.01  | 2.67   |
| 381112 | 'Arhgef33'      | 0.11  | 0.16  | 0.47 | 0    | 0.45 | 1.01  | 0    | 0.92  | 0.3   | 0      |
| 381113 | 'Cdkl4'         | 16.2  | 19.28 | 2.25 | 40.7 | 9.77 | 10.94 | 8.55 | 5.33  | 0.03  | 8.05   |
| 381122 | 'Capn13'        | 0     | 0     | 0    | 0    | 0    | 0     | 0    | 1.29  | 0     | 0      |
| 381126 | 'Garem1'        | 2.36  | 1.09  | 0.42 | 0.86 | 1.61 | 0.66  | 0    | 0.03  | 2.75  | 1.9    |
| 381142 | 'Arl14ep1'      | 0     | 0     | 0.15 | 0.05 | 0    | 0     | 0    | 0     | 0     | 0      |
| 381148 | 'Prob1'         | 0     | 0     | 0.75 | 0    | 0.2  | 1.72  | 0    | 0.01  | 0     | 0      |
| 381157 | 'Greb1l'        | 4.69  | 1.88  | 2.55 | 0.14 | 0.62 | 0.04  | 0.21 | 1.23  | 0.04  | 0.15   |
| 381196 | 'Gm960'         | 5.39  | 0.56  | 0.2  | 0    | 1.95 | 0     | 1.9  | 2.14  | 0     | 0.16   |
| 381199 | 'Tmem151a'      | 36.32 | 32.69 | 33.9 | 22.7 | 21.3 | 16.29 | 19.9 | 23.78 | 22.95 | 11.6   |
| 381201 | 'Ap5b1'         | 0.02  | 0     | 0    | 0    | 3.48 | 0     | 0    | 0     | 0     | 0      |
| 381204 | 'Naaladl1'      | 0     | 0     | 0.19 | 0    | 0    | 0.04  | 0    | 0     | 0     | 0      |
| 381217 | 'Fam189a2'      | 4.66  | 4.8   | 0    | 2.49 | 6.7  | 0.34  | 0    | 3.18  | 0.03  | 0      |
| 381218 | '4430402l18Rik' | 2.28  | 0.04  | 4.12 | 0    | 3.56 | 0     | 0.51 | 0     | 0.02  | 2.14   |
| 381229 | 'Cfap58'        | 0     | 0     | 0.03 | 0    | 2.45 | 0     | 0    | 0     | 0     | 0.33   |
| 381236 | 'Lipo3'         | 6.85  | 4.35  | 1.16 | 2.73 | 6.77 | 7.27  | 10.2 | 7.37  | 6.33  | 9.38   |
| 381259 | 'Tmem237'       | 44.68 | 57.68 | 26.5 | 46.4 | 30.5 | 36.78 | 19.3 | 42.68 | 51.7  | 40.32  |
| 381260 | 'Gm973'         | 5.94  | 1.9   | 1.3  | 17.8 | 1.47 | 3.88  | 0.14 | 4.54  | 0.28  | 0.83   |
| 381269 | 'Mreg'          | 3.48  | 1.11  | 1.34 | 0    | 2.67 | 0.24  | 0.72 | 3.36  | 0.84  | 1.27   |
| 381270 | 'March4'        | 0.02  | 0.86  | 1.42 | 8.14 | 1.18 | 2.14  | 4.72 | 0     | 1.87  | 6.25   |
| 381272 | 'A630095N17Rik' | 0     | 0     | 0    | 0    | 0    | 1.02  | 1.74 | 0     | 1.26  | 0      |
| 381280 | 'Hjurp'         | 14.25 | 12.57 | 6.77 | 9.96 | 3.8  | 10.16 | 25.9 | 17.13 | 19.48 | 18.04  |
| 381284 | 'Crocc2'        | 0     | 0.26  | 0.04 | 0    | 1.08 | 0.29  | 0    | 0     | 0     | 0.75   |
| 381290 | 'Atp2b4'        | 1.98  | 3.41  | 4    | 4.16 | 3.39 | 2.3   | 2.74 | 1.83  | 0.68  | 1.26   |
| 381293 | 'Kif14'         | 0     | 0     | 0    | 0    | 0    | 0     | 0    | 0     | 0.53  | 0      |
| 381305 | 'Rc3h1'         | 3.19  | 1.34  | 1.69 | 1.38 | 1.52 | 2.04  | 0.46 | 1.1   | 1.76  | 0.29   |

|        |                 |       |       |      |      |      |       |      |       |       |        |
|--------|-----------------|-------|-------|------|------|------|-------|------|-------|-------|--------|
| 381306 | 'BC055324'      | 2.1   | 0.07  | 0.02 | 0    | 0.05 | 0     | 0    | 0     | 2.67  | 0      |
| 381308 | 'lfi211'        | 0.06  | 0.07  | 0.18 | 0.08 | 0.12 | 0.08  | 0.1  | 0.03  | 0.09  | 0.09   |
| 381310 | 'Stum'          | 0.18  | 2.04  | 3.55 | 4.09 | 0.63 | 2.67  | 1.86 | 1.68  | 0     | 0      |
| 381314 | 'lars2'         | 6.76  | 5.09  | 9.32 | 2.7  | 9.73 | 0.18  | 13.2 | 5.47  | 0.02  | 3.67   |
| 381318 | 'Nsl1'          | 0.42  | 0.58  | 0.71 | 0.83 | 0.51 | 0.66  | 0.39 | 0.38  | 0.54  | 0.49   |
| 381319 | 'Batf3'         | 0     | 0     | 0    | 0    | 0    | 6.21  | 0    | 0     | 0     | 0      |
| 381334 | 'Gal3st2'       | 0     | 1     | 0    | 8.97 | 0    | 0     | 0    | 0     | 0     | 0.18   |
| 381338 | 'Lonrf2'        | 18.34 | 15.78 | 20   | 30.7 | 8.43 | 6.47  | 14.6 | 13.5  | 16.97 | 17.78  |
| 381339 | 'Tmem182'       | 0.02  | 0     | 0.08 | 0.05 | 0    | 0.02  | 0    | 0     | 0.04  | 0.03   |
| 381350 | 'Spag6'         | 2.93  | 0     | 0    | 0    | 0.52 | 0     | 0    | 0.03  | 0     | 0      |
| 381352 | 'Mamdc4'        | 0.18  | 0     | 0    | 0    | 0    | 2.29  | 0    | 0     | 0     | 0      |
| 381353 | 'Ajm1'          | 7.43  | 8.37  | 8.56 | 2.89 | 6.71 | 4.09  | 10.8 | 6.55  | 0.45  | 13.82  |
| 381356 | 'Cacfd1'        | 57.87 | 71.35 | 82.3 | 46.1 | 82.3 | 73.17 | 71.9 | 59.65 | 95.47 | 74.19  |
| 381359 | 'Prdm12'        | 0.46  | 0     | 0.6  | 0.01 | 0    | 0     | 0    | 0     | 0     | 0      |
| 381373 | 'Sp9'           | 0     | 0.07  | 0    | 0    | 0.92 | 0.16  | 0    | 0     | 0     | 0      |
| 381375 | 'Pjvk'          | 0     | 3.11  | 0    | 16.4 | 0    | 0     | 0    | 1.65  | 0     | 0      |
| 381379 | 'Med19'         | 13.91 | 17.28 | 17   | 11   | 29.8 | 18.7  | 29.5 | 22.29 | 19.41 | 16.33  |
| 381399 | 'Bpifb4'        | 0     | 0     | 0    | 0    | 0.63 | 0     | 0    | 0     | 0     | 0      |
| 381404 | 'Pabpc11'       | 0     | 0.67  | 0.45 | 0.57 | 0    | 0     | 0    | 0.16  | 0.02  | 0      |
| 381406 | 'Trp53rka'      | 6.35  | 2.85  | 19   | 9.71 | 5.13 | 0     | 3.27 | 2.96  | 17.68 | 4.97   |
| 381410 | 'Zfp408'        | 9.3   | 3.05  | 6.36 | 0.55 | 3.06 | 6.28  | 3.18 | 2.19  | 2.6   | 0.1    |
| 381411 | 'Accsl'         | 0     | 0     | 0.28 | 0    | 0    | 0     | 0    | 0     | 0     | 0      |
| 381413 | 'Gpr176'        | 4.21  | 3.29  | 12.6 | 7.7  | 5.1  | 9.13  | 4.54 | 7.71  | 5.64  | 13.42  |
| 381418 | 'Ctxn2'         | 128.9 | 107.7 | 151  | 71.7 | 193  | 264.9 | 246  | 157.5 | 188.8 | 145.07 |
| 381438 | 'Gm5148'        | 17.95 | 21.73 | 7.35 | 9.71 | 20.9 | 0.86  | 12.4 | 19.42 | 7.76  | 11.18  |
| 381463 | 'Nr1h5'         | 0     | 0.05  | 0.02 | 0.04 | 0.06 | 0.03  | 0    | 0.03  | 0     | 0      |
| 381489 | 'Rxfp1'         | 2.56  | 0     | 0    | 0.25 | 0    | 0     | 0    | 0.98  | 0     | 12.73  |
| 381510 | 'Dpy19I4'       | 3.04  | 3.02  | 2.76 | 7.3  | 0.53 | 2.02  | 3.94 | 1.36  | 0.16  | 1.66   |
| 381511 | 'Pdp1'          | 11.63 | 11.31 | 7.93 | 8.81 | 13.2 | 7.79  | 8.65 | 18.24 | 18.33 | 5.57   |
| 381522 | 'Ccdc180'       | 0     | 0     | 0    | 0    | 0    | 0     | 0    | 0     | 0     | 0.01   |
| 381534 | 'Ube2u'         | 0     | 0.42  | 0.22 | 0    | 0    | 0     | 0    | 0     | 0     | 0      |
| 381538 | 'Mroh7'         | 1.4   | 1.17  | 0.47 | 3.35 | 0.01 | 0     | 1.71 | 0.82  | 0.87  | 0.29   |
| 381544 | 'Armh1'         | 0     | 0     | 0    | 0    | 0    | 0     | 0    | 0.48  | 0     | 0      |
| 381546 | 'Ccdc24'        | 0     | 0     | 0    | 7.87 | 0    | 0     | 0    | 0     | 0     | 3.5    |
| 381549 | 'Zfp69'         | 0.6   | 0     | 0    | 0    | 0.48 | 0     | 0    | 0     | 0     | 0.97   |
| 381560 | 'Xkr8'          | 1.08  | 2.56  | 2.25 | 0    | 5.37 | 3.85  | 8.05 | 4.28  | 0.02  | 6.03   |
| 381582 | 'Tmem240'       | 7.16  | 2.1   | 14.6 | 0.16 | 20.9 | 7.83  | 9.53 | 6.4   | 14.1  | 5.26   |
| 381591 | 'L1td1'         | 0     | 0     | 0    | 0.04 | 0    | 0     | 0    | 0     | 0     | 0      |
| 381605 | 'Tbc1d2'        | 1.72  | 0     | 0    | 0    | 0.34 | 0     | 0    | 0     | 5.56  | 1.28   |
| 381622 | '5031410I06Rik' | 0     | 0     | 0.13 | 0    | 0.02 | 0     | 0.02 | 0.13  | 0.17  | 0.02   |
| 381626 | 'Rbm33'         | 0.17  | 1.01  | 0.05 | 4.84 | 1.12 | 3     | 1.97 | 0.52  | 4.19  | 0.75   |
| 381628 | 'Adgrf3'        | 0.34  | 0     | 0    | 1.57 | 0    | 0     | 2.46 | 0     | 0.41  | 0      |
| 381629 | 'Atraid'        | 192.6 | 286.9 | 245  | 375  | 245  | 298.5 | 220  | 282   | 317.3 | 321.62 |
| 381633 | 'Gm1673'        | 253.4 | 276.3 | 214  | 328  | 181  | 309   | 303  | 171.3 | 434.4 | 290.65 |
| 381634 | 'Gm1043'        | 1.47  | 0.8   | 0.63 | 3.09 | 3.04 | 1.44  | 1.75 | 0.63  | 0.35  | 1.59   |
| 381644 | 'Cep135'        | 1.38  | 0.85  | 1.11 | 2.16 | 2.07 | 0.76  | 1.8  | 0.6   | 0.45  | 2.01   |
| 381651 | 'Odaph'         | 0     | 1.94  | 0    | 0    | 0    | 0     | 0    | 0     | 0     | 0      |
| 381668 | 'Fbrsl1'        | 3.5   | 0.67  | 1.33 | 11.8 | 1.38 | 3.7   | 4.7  | 0.56  | 6.81  | 0.41   |
| 381673 | 'A330070K13Rik' | 0.98  | 0     | 0    | 0    | 0    | 0.55  | 0    | 0     | 0     | 0      |
| 381677 | 'Vgf'           | 33.16 | 69.68 | 36.6 | 9.94 | 13.3 | 41.99 | 10.7 | 38.11 | 83.11 | 34.85  |
| 381678 | 'Zcwpw1'        | 0     | 4.44  | 0.98 | 0.04 | 1.29 | 9.15  | 0    | 2.33  | 3.64  | 5.59   |
| 381693 | 'Wdr95'         | 3.61  | 0.31  | 0.31 | 0.05 | 0    | 0.18  | 0.68 | 0.82  | 0     | 0.93   |
| 381694 | 'B3glct'        | 1.42  | 0.66  | 2.46 | 0.01 | 1.65 | 0.18  | 2.07 | 1.57  | 0.99  | 1.52   |
| 381695 | 'N4bp2l2'       | 7.26  | 8.53  | 9.22 | 12.7 | 8.79 | 10.39 | 9.68 | 6.4   | 6.07  | 14.64  |
| 381714 | 'Gm9758'        | 0.22  | 0.27  | 0    | 0    | 0    | 0.54  | 0.17 | 0.09  | 0.14  | 0      |
| 381716 | '1700015F17Rik' | 0     | 0     | 0    | 0    | 0    | 0     | 0    | 1.39  | 0     | 0      |
| 381738 | 'Drc1'          | 21.4  | 14.58 | 20.6 | 25   | 11.9 | 19.95 | 22.4 | 12.99 | 9.34  | 13.51  |
| 381741 | 'Lrrc43'        | 0     | 4.51  | 0    | 0    | 2.84 | 1.53  | 0    | 5.4   | 2.07  | 4.78   |

|        |                 |       |       |      |      |      |       |      |       |       |       |
|--------|-----------------|-------|-------|------|------|------|-------|------|-------|-------|-------|
| 381759 | 'Wee2'          | 0.13  | 0     | 0    | 0    | 0.24 | 0     | 0    | 0     | 0.02  | 0.79  |
| 381760 | 'Ssbp1'         | 38.75 | 28.72 | 36   | 40.6 | 52.8 | 47.35 | 16.8 | 55.02 | 80.57 | 51.81 |
| 381798 | '4930590J08Rik' | 0     | 0.61  | 0.02 | 0.27 | 0    | 0     | 0    | 0     | 0.09  | 0     |
| 381801 | 'Tatdn2'        | 0     | 0.99  | 0    | 0.17 | 0.02 | 0.87  | 0    | 0     | 0     | 0     |
| 381802 | 'Tsen2'         | 8.72  | 5.18  | 13.6 | 9.02 | 10.1 | 0     | 33.7 | 19.24 | 9.71  | 31.12 |
| 381810 | 'Lpar5'         | 0     | 0     | 0    | 0    | 0    | 0     | 2.05 | 0     | 0     | 0     |
| 381812 | 'Cracr2a'       | 0.34  | 2.24  | 0.85 | 0.66 | 0.22 | 0.12  | 0.09 | 3.08  | 0.6   | 0.13  |
| 381813 | 'Prmt8'         | 3.92  | 0     | 4.2  | 2.7  | 15   | 10.88 | 3.53 | 12.84 | 10.63 | 1.42  |
| 381820 | 'Smim10l1'      | 61.95 | 101.7 | 58.2 | 61.5 | 117  | 43.1  | 61.8 | 62.82 | 57.75 | 61.65 |
| 381823 | 'Apold1'        | 2.41  | 0.98  | 0    | 0    | 1.5  | 9.64  | 2.29 | 1.8   | 6.51  | 7.84  |
| 381835 | 'Sbk3'          | 0.07  | 0     | 0    | 0    | 0    | 0     | 0    | 0     | 0     | 0     |
| 381838 | 'Vmn2r43'       | 0     | 0     | 0    | 0    | 0.01 | 0     | 0    | 0     | 0     | 0     |
| 381845 | 'Rnf225'        | 0.01  | 0.01  | 0    | 0.03 | 0.03 | 0.03  | 0    | 0.01  | 0.46  | 0     |
| 381853 | 'Gipr'          | 0.95  | 0.28  | 0.87 | 0.3  | 0.12 | 0.08  | 0.12 | 0.03  | 1.03  | 0.11  |
| 381884 | 'Slc6a16'       | 6.72  | 3.24  | 2.9  | 1.8  | 4.9  | 6.87  | 2.05 | 5.36  | 3.78  | 10.46 |
| 381903 | 'Alg8'          | 18.62 | 1.8   | 19.1 | 16.2 | 18.1 | 6.7   | 0.06 | 6.57  | 8.27  | 12.07 |
| 381914 | 'B230311B06Rik' | 3.18  | 0     | 5.93 | 0    | 0    | 3.62  | 0.5  | 0     | 0     | 0     |
| 381917 | 'Dnah3'         | 0.01  | 0     | 0    | 0    | 0    | 0     | 0    | 0     | 0     | 0     |
| 381921 | 'Taok2'         | 7.54  | 6.06  | 9.79 | 4.45 | 5.78 | 5.13  | 1.27 | 8.95  | 1.75  | 11.23 |
| 381925 | 'Plpp4'         | 5.49  | 0     | 9.44 | 0    | 20.5 | 46.69 | 22.2 | 1.95  | 7.7   | 9.85  |
| 381933 | '6430531B16Rik' | 0.15  | 0     | 2.34 | 0    | 0    | 0     | 0    | 0.09  | 0.39  | 0.1   |
| 381979 | 'Brsk1'         | 1.33  | 0.04  | 0.02 | 0.06 | 0    | 0.03  | 4.12 | 0.12  | 0.37  | 0.27  |
| 381983 | 'Lmtk3'         | 0.27  | 0.06  | 0.34 | 0.6  | 0.49 | 0.07  | 0.05 | 0.16  | 0.1   | 0.14  |
| 381990 | 'Zbtb2'         | 3.2   | 0.03  | 7.18 | 7.36 | 0.9  | 3.32  | 0.02 | 7.2   | 0.27  | 0.31  |
| 381994 | 'E030018B13Rik' | 0     | 0.2   | 0    | 0    | 0.55 | 0     | 0    | 0     | 0     | 0     |
| 382010 | 'Cep44'         | 4.78  | 3.2   | 2.38 | 0.82 | 4.66 | 6.09  | 14.3 | 3.42  | 1.5   | 10    |
| 382014 | 'Ano8'          | 0     | 0     | 0    | 0    | 0.2  | 0     | 0.11 | 0.05  | 0.02  | 0.01  |
| 382018 | 'Unc13a'        | 1.54  | 4.5   | 4.71 | 1.63 | 5.1  | 1.79  | 6.89 | 4.06  | 9.53  | 11.28 |
| 382019 | 'Zfp882'        | 2.71  | 0.78  | 0.04 | 0.1  | 4.38 | 0.07  | 0.67 | 1.22  | 0.04  | 3.73  |
| 382030 | 'Cnep1r1'       | 17.56 | 33.82 | 18.1 | 16.2 | 55.5 | 8.97  | 39.8 | 22.26 | 12    | 19.38 |
| 382034 | 'Gse1'          | 7.71  | 2.18  | 5.59 | 7.66 | 6.43 | 5.09  | 4.15 | 1.36  | 0.39  | 1.28  |
| 382038 | 'Urb2'          | 0     | 0.02  | 0    | 0    | 0    | 0     | 0    | 0.1   | 0     | 0     |
| 382051 | 'Pdp2'          | 8.37  | 6.14  | 6.64 | 22.8 | 13.5 | 5.55  | 6.13 | 10.17 | 8.48  | 7.3   |
| 382056 | 'Crtc1'         | 11.21 | 26.54 | 25.1 | 13.3 | 20.4 | 16.62 | 38.9 | 27.2  | 32.1  | 37.21 |
| 382066 | 'Prdm10'        | 0.57  | 1.69  | 1.33 | 0.01 | 0.98 | 1.25  | 0.55 | 0.65  | 1.87  | 1.37  |
| 382073 | 'Ccdc84'        | 18.4  | 14.26 | 40.3 | 19.6 | 13   | 9.14  | 11.4 | 29.52 | 13.32 | 10.42 |
| 382074 | 'Foxr1'         | 0.13  | 0.25  | 0.09 | 0.07 | 0.15 | 0.03  | 0.09 | 0.03  | 0.08  | 0.05  |
| 382075 | 'Odf3l1'        | 0     | 0     | 0.18 | 0    | 0    | 0     | 0    | 0     | 0     | 0     |
| 382077 | 'Ccdc33'        | 0     | 0     | 0    | 0    | 0    | 0     | 0    | 0     | 0.02  | 0     |
| 382083 | 'Snx22'         | 0.53  | 0.06  | 6    | 9.08 | 13.1 | 4.56  | 12.4 | 7.72  | 0.96  | 1.58  |
| 382089 | 'Ripply2'       | 5.57  | 9.99  | 2.04 | 4.51 | 12.3 | 10.13 | 10.3 | 16.99 | 8.69  | 10.87 |
| 382090 | 'Cep162'        | 8.45  | 4.8   | 4.69 | 1.25 | 11.9 | 3.3   | 5.08 | 3.79  | 4.16  | 9.66  |
| 382097 | 'Gm1123'        | 0.03  | 19.61 | 0    | 0    | 0.04 | 0.17  | 0    | 0     | 0     | 0     |
| 382111 | 'Susd5'         | 1.89  | 0     | 11.4 | 0    | 0.05 | 0     | 26.5 | 0     | 0     | 0.01  |
| 382113 | 'Slc22a14'      | 0     | 0     | 0    | 0    | 0    | 0     | 0    | 0     | 0.02  | 0     |
| 382117 | 'Tcaim'         | 3.55  | 4.92  | 8.66 | 1.35 | 1.69 | 5.16  | 9.91 | 9.58  | 6.67  | 8.43  |
| 382118 | 'Zkscan7'       | 0.97  | 0.23  | 3.28 | 0.06 | 0.33 | 0.01  | 0.25 | 0.56  | 0.17  | 0.16  |
| 382137 | 'Fdxacb1'       | 2.21  | 4.6   | 1.29 | 4.04 | 10.4 | 3.56  | 5.32 | 3.07  | 9.34  | 8.09  |
| 382206 | 'Ssx9'          | 0     | 0     | 0    | 0    | 0.04 | 0     | 0    | 0     | 1.29  | 0     |
| 382207 | 'Jade3'         | 2.66  | 0.34  | 0.1  | 0.02 | 0    | 0     | 0    | 1.59  | 1.47  | 0.35  |
| 382236 | 'Brwd3'         | 0.09  | 0     | 0.75 | 0    | 0.4  | 0.01  | 0.01 | 0     | 1.03  | 0.85  |
| 382244 | 'Gm15091'       | 0     | 0     | 0    | 0.1  | 0    | 0     | 0    | 0     | 0     | 0     |
| 382245 | 'Tmem29'        | 39.96 | 54.15 | 34.4 | 66.6 | 39.3 | 41.77 | 59.8 | 65.21 | 32.68 | 80.44 |
| 382252 | 'Bclaf3'        | 5.03  | 8.92  | 0.86 | 6.61 | 8.07 | 6.82  | 4.43 | 3.26  | 9.77  | 8.19  |
| 382253 | 'Cdkl5'         | 4.29  | 0.2   | 2.62 | 6.85 | 0.11 | 0     | 0.17 | 3.09  | 0     | 4.34  |
| 382265 | 'Cldn34c3'      | 0.4   | 0.09  | 0    | 0    | 0.3  | 0     | 0    | 0     | 0     | 0.52  |
| 382384 | 'Odf3l2'        | 0     | 0     | 0    | 0    | 2.74 | 5.25  | 0    | 6.67  | 4.97  | 2.8   |
| 382395 | 'Gm5174'        | 3.17  | 3.22  | 3.24 | 0.95 | 0.24 | 0     | 2.41 | 3.89  | 0.04  | 3.25  |

|        |            |       |       |      |      |      |       |      |       |       |        |
|--------|------------|-------|-------|------|------|------|-------|------|-------|-------|--------|
| 382406 | 'Poc1b'    | 1.47  | 0.26  | 0    | 9.37 | 1.07 | 1.71  | 0.21 | 0     | 0     | 1.63   |
| 382423 | 'Atxn7l3b' | 48.82 | 73.82 | 62.2 | 52   | 70.2 | 74.58 | 66.8 | 76.73 | 77.19 | 58.79  |
| 382427 | 'Best3'    | 0     | 0.02  | 0    | 0    | 1.19 | 0     | 0    | 0     | 0     | 1.35   |
| 382523 | 'Gm12260'  | 0     | 0     | 2.43 | 0    | 0    | 0     | 0    | 0     | 0     | 2.26   |
| 382543 | 'Ankfn1'   | 0.04  | 1.19  | 4.28 | 0.99 | 0.48 | 0     | 3.56 | 0.52  | 0     | 0.05   |
| 382562 | 'Pfn4'     | 10.53 | 7.25  | 8.02 | 40.3 | 2.22 | 3.38  | 5.2  | 11.19 | 0.92  | 5.1    |
| 382571 | 'Kcnf1'    | 9.33  | 14.04 | 3.86 | 9.23 | 7.71 | 1.75  | 2.23 | 7.23  | 9.51  | 6.67   |
| 382620 | 'Tmed8'    | 0.36  | 0.81  | 0.25 | 0.75 | 0.45 | 0.28  | 2.51 | 0.45  | 0.18  | 2.98   |
| 382639 | 'Zbtb42'   | 0     | 0     | 0.01 | 0.93 | 0    | 0     | 0    | 0     | 0     | 0      |
| 382793 | 'Mtx3'     | 3.12  | 2.67  | 0.91 | 0    | 5.62 | 0.1   | 5.86 | 0.31  | 2.39  | 1.05   |
| 382864 | 'Colq'     | 0     | 0     | 0    | 0    | 0    | 0     | 0    | 0.08  | 0     | 0.02   |
| 382867 | 'Zfp488'   | 47.09 | 52.61 | 77.2 | 80.1 | 83.4 | 62.88 | 65.5 | 44.01 | 88.32 | 61.34  |
| 382913 | 'Neil2'    | 0.52  | 0.06  | 0.41 | 0    | 2.85 | 0.05  | 0.01 | 1.55  | 2.58  | 0.55   |
| 382985 | 'Rrm2b'    | 3.58  | 8.48  | 14   | 6.25 | 9.26 | 5.94  | 8.21 | 5.12  | 5.32  | 10.41  |
| 383103 | 'Typ23a'   | 20.08 | 12.51 | 21.1 | 4.95 | 12.3 | 16.18 | 25.8 | 18.03 | 9.05  | 8.16   |
| 383295 | 'Ypel5'    | 97.3  | 113.1 | 101  | 109  | 93.4 | 109.5 | 88.7 | 121.7 | 97.63 | 125.9  |
| 383348 | 'Kctd16'   | 9.76  | 8.66  | 2.53 | 0    | 20.6 | 15.39 | 13.1 | 22.13 | 4.13  | 0      |
| 383563 | 'Gpr25'    | 0.11  | 0.1   | 0.17 | 0    | 0.3  | 1.94  | 0.18 | 0.1   | 0.42  | 0.17   |
| 383592 | 'Kif28'    | 0     | 0     | 0    | 1.18 | 0    | 0     | 0    | 0     | 0     | 0      |
| 383619 | 'Aim2'     | 0.3   | 0.28  | 0.79 | 0.37 | 0.78 | 2.33  | 4.82 | 0.41  | 0.34  | 1.46   |
| 383678 | 'Obp2b'    | 0     | 0     | 0    | 0    | 0    | 0     | 0    | 0     | 0     | 1.62   |
| 383766 | 'Tlhc2'    | 0.03  | 1.82  | 0.04 | 0.09 | 0.1  | 0.08  | 0.55 | 0.04  | 0.07  | 0.02   |
| 383787 | 'Ankrd63'  | 0     | 0     | 0    | 0    | 0.24 | 0     | 0    | 0.01  | 0     | 0      |
| 384009 | 'Glipr2'   | 3.23  | 2.19  | 0    | 0    | 2.86 | 0.02  | 5.11 | 0     | 0     | 0      |
| 384061 | 'Fndc5'    | 2.86  | 4.86  | 5.09 | 0    | 6.01 | 5.97  | 4.89 | 3.87  | 7.36  | 6.09   |
| 384071 | 'Slc25a34' | 0     | 0     | 0    | 0    | 0    | 0     | 0    | 0     | 0     | 3.31   |
| 384185 | 'Arl9'     | 0     | 0     | 0    | 0    | 0    | 0     | 0    | 0     | 0     | 1.43   |
| 384198 | 'Fam47e'   | 0     | 0     | 0    | 0    | 0    | 0     | 0    | 0     | 3.76  | 0      |
| 384214 | 'Ephx4'    | 8.74  | 6.09  | 8.21 | 10.6 | 1.23 | 4.97  | 0    | 0.11  | 0.72  | 4.74   |
| 384281 | 'Gatc'     | 32.98 | 34.45 | 26.4 | 21.8 | 43.5 | 36.79 | 53.9 | 33.15 | 26.33 | 27.97  |
| 384309 | 'Trim56'   | 3.23  | 0.38  | 0.57 | 0.65 | 0.54 | 0.36  | 0.49 | 0.05  | 0.16  | 0.65   |
| 384534 | 'Vmn2r52'  | 0     | 0     | 0.02 | 0    | 0    | 0     | 0    | 0     | 0     | 0      |
| 384569 | 'Nova2'    | 2.09  | 1.41  | 2.41 | 1.47 | 1.02 | 2.54  | 0.7  | 1.17  | 0.16  | 1.85   |
| 384605 | 'Wdr88'    | 0     | 0.03  | 0    | 0    | 0    | 0     | 0    | 0.14  | 0     | 0      |
| 384619 | 'Ccdc155'  | 0     | 0.37  | 0    | 0    | 5.95 | 0.23  | 0    | 0.17  | 0     | 0      |
| 384701 | 'Usp17ld'  | 0     | 0.03  | 0    | 0    | 0    | 0     | 0    | 0     | 0     | 0      |
| 384724 | 'Cyp2t4'   | 0     | 0.03  | 0    | 0    | 0    | 0     | 0    | 0     | 0     | 0      |
| 384763 | 'Zfp667'   | 6.6   | 7.57  | 4.56 | 19.9 | 6.93 | 6.41  | 4.02 | 15.82 | 11.12 | 7.03   |
| 384783 | 'Irs2'     | 5.73  | 13.25 | 9.83 | 12.1 | 1.95 | 7.48  | 3.3  | 5.65  | 0.81  | 7.5    |
| 384806 | 'Adam20'   | 0     | 0     | 0    | 0    | 0    | 0     | 0    | 0     | 0     | 0.02   |
| 385024 | 'Gm5373'   | 0.05  | 0     | 0    | 0    | 0    | 0     | 0    | 0     | 0     | 0      |
| 385312 | 'Ssxb10'   | 0     | 0     | 0    | 0    | 0.23 | 0     | 0    | 0     | 0     | 0.07   |
| 385354 | 'Frmf7'    | 0     | 0     | 0    | 0    | 0    | 0     | 1.67 | 0     | 0     | 0      |
| 385377 | 'Pnma5'    | 0.06  | 0.02  | 0    | 0.02 | 0.02 | 0.31  | 0    | 0.09  | 0.32  | 0.13   |
| 385658 | 'Nxpe3'    | 5     | 4.75  | 2.11 | 0.6  | 0.33 | 6.23  | 2.82 | 4.55  | 5.37  | 2.41   |
| 385668 | 'Lca5l'    | 1.02  | 0.05  | 2.42 | 0.6  | 1.08 | 2.09  | 0    | 0.25  | 0.98  | 0.32   |
| 385674 | 'Zfp174'   | 3.84  | 0.22  | 0.16 | 0    | 1.3  | 0.01  | 0    | 0.41  | 0.01  | 0      |
| 386454 | 'Rnf39'    | 0     | 0.03  | 0.44 | 0    | 1.28 | 0     | 0.04 | 0.79  | 1.99  | 0      |
| 386612 | 'Thoc6'    | 3.38  | 13.17 | 3.45 | 15.9 | 26.2 | 21.85 | 9.83 | 17.46 | 17.32 | 15.66  |
| 386649 | 'Nsfl1c'   | 176.5 | 163.6 | 184  | 259  | 150  | 196.3 | 169  | 155.8 | 181   | 185.48 |
| 386655 | 'Eid2'     | 6.05  | 2.85  | 6.44 | 7.51 | 3.59 | 1.85  | 1.07 | 10.3  | 7.6   | 4.84   |
| 386750 | 'Slitrk3'  | 13.57 | 6.11  | 11.3 | 6.75 | 5.98 | 2.56  | 6.59 | 1.98  | 8.55  | 0.89   |
| 386753 | 'Dbpht2'   | 41.21 | 72.72 | 34.4 | 107  | 67.7 | 14.74 | 29.3 | 23.38 | 15.07 | 27.99  |
| 387285 | 'Hctr2'    | 2.34  | 7.42  | 3.64 | 4.32 | 2.67 | 2.27  | 4.34 | 4.12  | 14.95 | 2.14   |
| 387314 | 'Tmtc1'    | 3.58  | 3     | 1.49 | 1.21 | 3.43 | 0.19  | 1.85 | 3.39  | 0.64  | 2.61   |
| 387510 | 'Ifnk'     | 0     | 0     | 0    | 0    | 0    | 0     | 0    | 0.1   | 0     | 0      |
| 387524 | 'Znrf2'    | 0.02  | 2.1   | 2.01 | 0.09 | 0.02 | 0.71  | 1.35 | 1.05  | 0     | 0.36   |
| 387586 | 'Ssxb5'    | 0.08  | 0     | 0    | 0    | 0.43 | 0     | 0    | 0     | 0     | 0.13   |





|        |                 |       |       |      |      |      |       |      |       |       |       |
|--------|-----------------|-------|-------|------|------|------|-------|------|-------|-------|-------|
| 432486 | 'Gnptab'        | 7.25  | 1.89  | 2.54 | 2.89 | 2.65 | 0.17  | 0.02 | 1.91  | 8.35  | 3.64  |
| 432508 | 'Cpsf6'         | 5.42  | 13.58 | 8.48 | 11.1 | 11.4 | 4.66  | 9.75 | 5.44  | 7.46  | 9.83  |
| 432516 | 'Myo1a'         | 0.08  | 0     | 0    | 0    | 0    | 0     | 0    | 0     | 0     | 0     |
| 432530 | 'Adcy1'         | 0.58  | 1.89  | 1.72 | 0.39 | 0.5  | 0.26  | 1.21 | 0.67  | 0     | 0.03  |
| 432552 | 'Fam71b'        | 0.06  | 0     | 0    | 0    | 0    | 0     | 0    | 0     | 0     | 0     |
| 432555 | 'Gm5431'        | 0.23  | 0.13  | 0.08 | 0.28 | 0.13 | 0.31  | 0.02 | 0.01  | 0.59  | 0.06  |
| 432572 | 'Specc1'        | 12.63 | 6.22  | 2.63 | 3.41 | 7.78 | 3.41  | 6.52 | 5.97  | 4.03  | 5.33  |
| 432582 | 'Ccdc92b'       | 0     | 1.24  | 0.79 | 0    | 4.1  | 0     | 0    | 3.1   | 2.66  | 0     |
| 432611 | 'Dnaic2'        | 2.94  | 2.47  | 2.91 | 4.9  | 1.19 | 8.15  | 0    | 0.71  | 0.93  | 0.35  |
| 432628 | 'Mfsd2b'        | 0     | 0     | 0.44 | 0    | 0    | 0.01  | 0    | 0.71  | 1.94  | 1     |
| 432677 | 'Vrtn'          | 0     | 0     | 0    | 0    | 2.79 | 0     | 0    | 0     | 0     | 0     |
| 432731 | 'Zscan26'       | 79.86 | 56.61 | 47.1 | 79.3 | 84.6 | 58.36 | 48.6 | 70.32 | 93.19 | 66.16 |
| 432763 | 'Prr7'          | 4.46  | 5.8   | 4.18 | 11.6 | 0.33 | 3.18  | 1.61 | 3.03  | 3.38  | 2.78  |
| 432769 | 'Zfp708'        | 0.07  | 2.99  | 1.27 | 6.13 | 1.85 | 0     | 0    | 0.35  | 7.94  | 0.11  |
| 432770 | 'Rscan18'       | 0     | 0     | 0.02 | 0    | 0    | 0     | 0    | 0     | 0     | 0     |
| 432779 | 'Lrrc14b'       | 0.63  | 0.26  | 2.92 | 0.21 | 0.16 | 0.02  | 0.04 | 1.01  | 0.55  | 0.08  |
| 432825 | 'Gm5458'        | 0.21  | 0     | 0    | 0    | 0    | 0     | 0.08 | 0.06  | 0.07  | 0     |
| 432839 | 'Gprin2'        | 0.14  | 0.34  | 1.85 | 0    | 0    | 1.27  | 0.46 | 0.21  | 1.47  | 2.41  |
| 432860 | 'B020004C17Rik' | 0     | 0     | 0.02 | 0    | 0    | 0     | 0    | 0     | 0.04  | 0     |
| 432940 | 'Otuln'         | 0     | 1.02  | 2.76 | 5.54 | 0.07 | 5.38  | 0    | 0     | 3.79  | 1.49  |
| 432964 | 'K230010J24Rik' | 0     | 0     | 0    | 0    | 0    | 0     | 0    | 0.23  | 0     | 0     |
| 432995 | 'Smim22'        | 0.14  | 0.58  | 1.94 | 0    | 17.4 | 36.62 | 0    | 1.19  | 24.66 | 28.63 |
| 433022 | 'Plcxd2'        | 2.12  | 1.94  | 5.27 | 0.03 | 1.25 | 1.61  | 5.37 | 2.25  | 1.33  | 4.6   |
| 433091 | 'Pnpla1'        | 0.6   | 0.04  | 0.29 | 0.45 | 0.09 | 0.1   | 0.06 | 0.05  | 0.08  | 0.12  |
| 433099 | 'Ly6g6f'        | 0     | 0     | 0    | 2.37 | 0    | 0     | 0    | 0     | 0     | 0     |
| 433182 | 'Eno1b'         | 0.06  | 0.16  | 0.06 | 0    | 0    | 0.13  | 0    | 0.05  | 0.24  | 0.15  |
| 433215 | 'Tmem262'       | 0     | 0     | 0.38 | 0.36 | 0    | 0     | 0    | 0.08  | 0     | 0     |
| 433256 | 'Acsl5'         | 15.45 | 18.93 | 22.2 | 11.9 | 8.57 | 28.4  | 7.35 | 21.73 | 32.63 | 31.25 |
| 433287 | 'Gm15455'       | 0     | 0.32  | 0.02 | 0    | 0    | 0     | 0    | 0     | 0.61  | 0     |
| 433292 | 'Nms'           | 87.63 | 0     | 0    | 0    | 0    | 0     | 6.27 | 0     | 0     | 6.53  |
| 433294 | 'Mettl21c'      | 0.04  | 0     | 0    | 0.05 | 0.33 | 0     | 0    | 0     | 0.34  | 0     |
| 433323 | 'Sgpp2'         | 5.34  | 3.74  | 6.24 | 2.4  | 16   | 2.18  | 8.92 | 3.54  | 11.33 | 1.68  |
| 433365 | 'Teddm1b'       | 0.58  | 2.1   | 0.75 | 1.6  | 0.42 | 0.68  | 0.48 | 0.41  | 0.87  | 0.45  |
| 433375 | 'Creg1'         | 48.55 | 60.2  | 41.9 | 20.5 | 60   | 111.6 | 56.1 | 58.25 | 68.89 | 74.44 |
| 433415 | 'Gm13420'       | 0     | 0.77  | 2.25 | 0.84 | 0    | 0     | 2.69 | 0.06  | 3.34  | 0     |
| 433416 | 'Gm13547'       | 0     | 0     | 0.46 | 0    | 0    | 0     | 0    | 0.09  | 0     | 0     |
| 433466 | 'Jmjd7'         | 7.17  | 12.92 | 7.92 | 8.1  | 3.87 | 12.11 | 29.5 | 7.7   | 4.01  | 16.6  |
| 433470 | 'AA467197'      | 0     | 0     | 2.83 | 0    | 0    | 0     | 0    | 0     | 3.65  | 0     |
| 433485 | 'Syndig1'       | 33.64 | 53.34 | 24.7 | 18.2 | 18   | 16.6  | 13.3 | 71.07 | 22.53 | 14.25 |
| 433586 | 'Maml3'         | 5.44  | 1.69  | 0.44 | 7.13 | 6.48 | 0.01  | 4.18 | 0.83  | 3.14  | 0.33  |
| 433638 | 'I830077J02Rik' | 0     | 0.04  | 0    | 0    | 0    | 3.51  | 0    | 0     | 0     | 0     |
| 433653 | 'Gimd1'         | 0.01  | 0     | 0    | 0.01 | 0    | 0     | 0    | 0     | 0     | 0     |
| 433667 | 'Ankrd13c'      | 3.47  | 1.64  | 6.09 | 0.77 | 2.03 | 0.31  | 7.11 | 3.04  | 4.21  | 1.63  |
| 433693 | 'Akirin2'       | 13.02 | 6.45  | 3.33 | 4.8  | 8.43 | 1.98  | 4.91 | 2.56  | 6.97  | 2.77  |
| 433698 | 'Fam205a1'      | 1.21  | 0.13  | 0.42 | 0.25 | 0.78 | 0.09  | 0.83 | 0.17  | 0.07  | 1.39  |
| 433700 | 'Spag8'         | 0     | 3.93  | 0.83 | 0    | 0    | 5.34  | 0    | 0     | 0     | 0     |
| 433702 | 'Ncbp1'         | 29.81 | 19.43 | 19.4 | 27.7 | 20.7 | 3.44  | 9.07 | 11.25 | 13.68 | 21.45 |
| 433752 | 'Frg2f1'        | 7.69  | 2.25  | 3.66 | 0    | 2.61 | 1.66  | 5.37 | 5.1   | 7.87  | 6.27  |
| 433759 | 'Hdac1'         | 19.8  | 32.73 | 30.6 | 29   | 12.7 | 25.32 | 23.5 | 22.56 | 17.27 | 28.82 |
| 433766 | 'Trim63'        | 0.02  | 0     | 0.1  | 0    | 0.03 | 0     | 0    | 0     | 0.02  | 0     |
| 433771 | 'Minos1'        | 107.9 | 95.88 | 85   | 170  | 81.9 | 96.35 | 77.1 | 88.13 | 57.28 | 78.74 |
| 433791 | 'Zfp992'        | 0.03  | 0     | 0.03 | 0    | 0.4  | 0     | 0.01 | 0     | 1.15  | 0.43  |
| 433801 | 'Gm13212'       | 0.2   | 0     | 0.08 | 0.37 | 0.02 | 0.01  | 0    | 0     | 0     | 0.03  |
| 433804 | 'Zfp985'        | 0.01  | 0.02  | 0    | 0    | 0    | 0.12  | 0    | 0     | 0.01  | 0     |
| 433809 | 'Rnf207'        | 1.62  | 2.59  | 1.7  | 2.09 | 3.92 | 3.66  | 7.88 | 7.9   | 0.72  | 2.11  |
| 433813 | 'Pusl1'         | 20.15 | 30.29 | 25.7 | 29.9 | 33.3 | 28.09 | 25.7 | 37.33 | 13.33 | 24.6  |
| 433864 | 'Nom1'          | 14.36 | 10.14 | 13.7 | 11.9 | 14.8 | 9.59  | 15.9 | 7.8   | 18.42 | 18.68 |
| 433868 | '3110082J24Rik' | 0     | 0     | 0    | 0    | 0    | 2.48  | 0    | 0.89  | 0     | 1.12  |

|        |            |       |       |      |      |      |       |      |       |       |       |
|--------|------------|-------|-------|------|------|------|-------|------|-------|-------|-------|
| 433904 | 'Ociad2'   | 23.01 | 31.82 | 21.4 | 26.8 | 31.5 | 30.44 | 40.2 | 34.99 | 32.74 | 43.09 |
| 433926 | 'Lrrc8b'   | 0.47  | 0.95  | 0.23 | 0.01 | 0.6  | 0.03  | 0.09 | 0     | 0     | 0.05  |
| 433931 | 'Pigg'     | 6.07  | 4.04  | 1.66 | 0    | 4.41 | 1.36  | 8.08 | 4.29  | 6.01  | 5.48  |
| 433938 | 'Mn1'      | 5.25  | 3.62  | 1.4  | 15.8 | 8.75 | 0.01  | 1.93 | 6.52  | 5.51  | 1.88  |
| 433940 | 'Fam222a'  | 1.4   | 1.72  | 0    | 0.06 | 2.63 | 0     | 0.39 | 0     | 0     | 0.14  |
| 433956 | 'Dnaaf5'   | 2.1   | 1.99  | 0.04 | 3.49 | 2.3  | 0     | 0.48 | 0     | 0.06  | 0     |
| 434008 | 'Tmem178b' | 2.76  | 5.44  | 3.66 | 0.64 | 2.92 | 1.55  | 2.74 | 2.25  | 0.25  | 0.95  |
| 434113 | 'Vmn2r44'  | 0     | 0     | 0    | 0    | 0.02 | 0     | 0    | 0     | 0     | 0     |
| 434117 | 'Vmn2r50'  | 0     | 0     | 0    | 0    | 0.01 | 0     | 0    | 0     | 0     | 0     |
| 434128 | 'Pnmal2'   | 155.8 | 156.3 | 171  | 146  | 185  | 127.8 | 130  | 141.4 | 153.8 | 162.1 |
| 434130 | 'Ccadc8'   | 0     | 0     | 0    | 0    | 0    | 0     | 0    | 2.42  | 2.15  | 0.02  |
| 434156 | 'Eid2b'    | 13.55 | 21.43 | 15.3 | 13.5 | 13.1 | 9.12  | 14.9 | 3.95  | 19.87 | 4.58  |
| 434178 | 'Zfp141'   | 3.49  | 5.22  | 5.74 | 7.69 | 2.33 | 1.52  | 1.94 | 3.65  | 8.67  | 4.21  |
| 434179 | 'Zfp975'   | 4.4   | 1.45  | 3.62 | 0    | 3.05 | 0.02  | 0    | 3.87  | 0.02  | 8.43  |
| 434197 | 'Fam169b'  | 0.17  | 0.4   | 0.27 | 0.41 | 0.36 | 0.18  | 0.39 | 0.12  | 0.16  | 0.26  |
| 434204 | 'Whamm'    | 2.98  | 1.36  | 4.21 | 13.4 | 0.72 | 6.21  | 0.92 | 0.94  | 4.8   | 3.1   |
| 434215 | 'Lrrc32'   | 0     | 0     | 0    | 0    | 0    | 0     | 0    | 0     | 3.77  | 0     |
| 434218 | 'Trim34b'  | 0     | 0     | 0    | 0    | 0    | 0     | 0.03 | 0     | 0     | 0     |
| 434223 | 'Gm1966'   | 0     | 0     | 0    | 0    | 0.03 | 0.18  | 0    | 0     | 0.1   | 0     |
| 434232 | 'lqck'     | 4.09  | 1.93  | 8.36 | 0.52 | 2.66 | 0     | 1.22 | 5.67  | 5.05  | 5.15  |
| 434233 | 'Ppp1ccb'  | 0     | 0     | 0    | 0.09 | 0.8  | 4.58  | 1.45 | 0.07  | 0.15  | 0     |
| 434234 | 'Rexo5'    | 1.9   | 3.97  | 0.05 | 0    | 2.7  | 1.35  | 0.15 | 1.04  | 1.59  | 0.05  |
| 434246 | 'Trim72'   | 0     | 0.1   | 0.14 | 0.07 | 0    | 0.31  | 1.61 | 0.02  | 0.17  | 0.57  |
| 434341 | 'Nlrc5'    | 0     | 0     | 0    | 3.4  | 0.1  | 0     | 0    | 0     | 0     | 0     |
| 434377 | 'Zfp560'   | 3.28  | 2.55  | 3.66 | 2.81 | 4.2  | 2.72  | 3.15 | 2.05  | 3.71  | 3.13  |
| 434402 | 'Gm5617'   | 11.13 | 14.56 | 11.2 | 21.6 | 16.6 | 35.99 | 17.7 | 11.81 | 15.22 | 22.85 |
| 434423 | 'Dppa5a'   | 2.84  | 4.76  | 6.39 | 0    | 2.31 | 0.08  | 0    | 2.37  | 11.07 | 11.63 |
| 434436 | 'Lsmem2'   | 0     | 0     | 0.04 | 0    | 0    | 0     | 0    | 0     | 0     | 0     |
| 434437 | 'Amt'      | 48.73 | 61.47 | 23.2 | 35   | 58.6 | 40.52 | 33.6 | 24.88 | 26.83 | 39.37 |
| 434438 | 'Ccadc36'  | 1.76  | 7.18  | 1.87 | 12.9 | 0.02 | 0.38  | 0.33 | 0.17  | 0.03  | 0.95  |
| 434484 | 'Sp140'    | 0     | 0     | 0    | 0    | 0    | 0     | 0    | 0     | 0     | 0.07  |
| 434689 | 'Gm10220'  | 0.6   | 1.26  | 1.28 | 0.02 | 3.34 | 0     | 0    | 0     | 0.97  | 0.1   |
| 434756 | 'Akap14'   | 0.07  | 0.54  | 0    | 0    | 0    | 0     | 0    | 0     | 0     | 0     |
| 434768 | 'Rhox8'    | 0.3   | 0.42  | 1.22 | 1.03 | 0.06 | 0.55  | 0.72 | 0.14  | 1.46  | 0.07  |
| 434778 | 'Ccadc160' | 11.03 | 10.41 | 5.92 | 17.9 | 8.56 | 4.78  | 4.02 | 11.77 | 9.42  | 24.69 |
| 434784 | 'Ldoc1'    | 0     | 3.08  | 6.83 | 0    | 3    | 0     | 10.9 | 0     | 0     | 0     |
| 434794 | 'Xlr4a'    | 0.04  | 0.05  | 1.56 | 0    | 0    | 0     | 0    | 0     | 0     | 0     |
| 434797 | 'Gm5640'   | 0     | 0.05  | 0    | 0    | 0    | 0     | 7.73 | 0     | 0     | 2.81  |
| 434800 | 'Smim9'    | 0     | 0     | 0    | 0    | 0    | 0     | 0    | 0.37  | 0     | 0     |
| 435145 | 'Shisa8'   | 0     | 0     | 0.03 | 0    | 0    | 0     | 0    | 0     | 0     | 0     |
| 435337 | 'Gm5662'   | 0     | 0     | 0    | 0    | 0.95 | 0     | 0    | 0     | 0     | 0     |
| 435376 | 'Atp6ap1'  | 0     | 6.51  | 10.6 | 0    | 0    | 0     | 0    | 0     | 0.1   | 0     |
| 435391 | 'Dupd1'    | 0     | 0     | 0    | 0.07 | 0    | 0     | 0    | 0     | 0     | 0     |
| 435529 | 'Adgrf2'   | 0     | 0     | 0    | 0    | 0    | 0     | 2.05 | 0     | 1.19  | 0     |
| 435653 | 'Fcrib'    | 3.64  | 2.5   | 3.18 | 0    | 0.2  | 7.37  | 6.17 | 0     | 0.19  | 3.66  |
| 435684 | 'Shf'      | 0.34  | 0.49  | 0    | 0    | 0.1  | 0     | 1.57 | 0     | 0     | 1.83  |
| 435766 | 'Tnni3k'   | 0     | 0     | 0.04 | 0    | 0    | 0.01  | 4.07 | 0.02  | 0     | 0.04  |
| 435811 | 'Ldlrad2'  | 0.65  | 2.8   | 0.29 | 7.17 | 0.33 | 0.04  | 0.08 | 2.3   | 0.15  | 3.17  |
| 435965 | 'Lrp3'     | 1.76  | 3.71  | 1.96 | 0    | 14.5 | 6.8   | 4.18 | 2.42  | 2.83  | 7.63  |
| 436008 | 'Gm5737'   | 0.49  | 0.34  | 0.38 | 0.02 | 0    | 0     | 0    | 0     | 0     | 1.41  |
| 436022 | 'Dnaaf3'   | 0     | 0     | 2.58 | 0    | 0.52 | 3.19  | 0    | 0     | 0     | 0     |
| 436062 | 'Fam92b'   | 16.14 | 6.89  | 4.55 | 25.1 | 18.7 | 0     | 0.06 | 5.39  | 3.11  | 6.54  |
| 436090 | 'Gpr62'    | 13.38 | 7.16  | 16.5 | 11.7 | 0.15 | 10.03 | 8.08 | 9.24  | 7.29  | 7.15  |
| 436240 | 'Foxr2'    | 1.47  | 2.55  | 6.64 | 0.02 | 0.87 | 1.51  | 5.09 | 1.74  | 12.82 | 2.51  |
| 436336 | 'Gm5767'   | 0     | 0     | 0    | 0    | 0    | 0     | 0    | 0.99  | 0     | 0     |
| 436440 | 'Gpr31b'   | 0     | 0     | 0    | 0    | 0    | 0     | 0    | 0     | 0     | 0.05  |
| 442801 | 'Arhgef15' | 7.7   | 8.53  | 14.9 | 9.39 | 5.2  | 15.42 | 7.62 | 14.23 | 12.53 | 13.09 |
| 442829 | 'Ccin'     | 0     | 0     | 0    | 0    | 0    | 0.02  | 0    | 0     | 0     | 0     |

|        |                 |       |       |      |      |      |       |      |       |       |       |
|--------|-----------------|-------|-------|------|------|------|-------|------|-------|-------|-------|
| 442834 | 'D830031N03Rik' | 0.18  | 0.16  | 0.11 | 0    | 0.59 | 0     | 1.78 | 0     | 0.28  | 0     |
| 445007 | 'Nup85'         | 31.27 | 33.48 | 39   | 44.5 | 36.5 | 43.93 | 41.1 | 27.29 | 34.75 | 44.95 |
| 446099 | 'Nlrp4e'        | 0     | 0     | 0    | 0    | 0    | 0     | 0    | 0     | 0.58  | 0     |
| 446101 | 'Xrra1'         | 2.91  | 0.03  | 0.81 | 0.12 | 0    | 0.09  | 7.95 | 0     | 1.55  | 1.33  |
| 448850 | 'Znhit3'        | 70.24 | 77.38 | 93.7 | 95.6 | 79.5 | 111.8 | 65   | 53.71 | 86.02 | 87.34 |
| 448987 | 'Fbxl7'         | 0     | 2.26  | 0    | 0    | 0    | 0     | 0    | 0     | 0     | 0.03  |
| 449000 | 'Zfp960'        | 8.24  | 4.28  | 1.55 | 0    | 1.13 | 0.34  | 0.96 | 3.9   | 2.74  | 2.93  |
| 449521 | 'Zfp213'        | 7.14  | 8.67  | 6.97 | 0    | 2.93 | 3.13  | 14.8 | 7.45  | 4.66  | 8.87  |
| 450219 | 'Gsdma3'        | 0     | 0     | 0.22 | 0    | 0    | 0     | 0    | 0     | 0     | 0     |
| 474156 | 'Zbtb9'         | 0     | 1.28  | 5.02 | 0    | 2.49 | 11.39 | 0    | 0     | 3.83  | 1.88  |
| 494448 | 'Cbx6'          | 10.51 | 15.3  | 8.96 | 6.68 | 12.7 | 10.08 | 22.1 | 10.57 | 14.09 | 18.14 |
| 494468 | 'Armcx5'        | 11.18 | 32.11 | 23.4 | 56.4 | 26.1 | 9.85  | 26.3 | 15.97 | 12.22 | 11.54 |
| 497097 | 'Xkr4'          | 1.82  | 2.45  | 1.79 | 4.4  | 1.56 | 1.66  | 3.11 | 1.73  | 0.02  | 1.93  |
| 497114 | 'Defa23'        | 0     | 0     | 0    | 0    | 0    | 0     | 0.55 | 0     | 0     | 0     |
| 497652 | 'Acd'           | 68.95 | 62.63 | 59.5 | 65.3 | 48.2 | 130.7 | 31.3 | 53.17 | 40.37 | 50.3  |
| 503491 | 'Defa24'        | 0     | 0     | 0    | 0    | 0    | 0     | 43.5 | 0     | 0     | 0     |
| 503610 | 'Zdhhc18'       | 1.03  | 1.49  | 3.7  | 8.71 | 5.28 | 2.71  | 0.2  | 3.86  | 4.35  | 0.04  |
| 503692 | 'Aym1'          | 0     | 0     | 0    | 0    | 0.82 | 0     | 0    | 0     | 0.82  | 0     |
| 504186 | 'Chrna10'       | 0     | 0     | 0    | 0    | 0    | 0     | 0    | 0     | 0.02  | 0     |
| 504193 | 'Npcd'          | 13.63 | 17.05 | 8.95 | 27.6 | 7.07 | 6.74  | 17.8 | 12.22 | 4.81  | 8.86  |
| 50490  | 'Nox4'          | 2.63  | 0     | 0.73 | 0    | 0.18 | 0.49  | 0    | 0     | 0     | 0     |
| 50492  | 'Thop1'         | 29.99 | 35.53 | 39   | 0.02 | 15.9 | 21.53 | 24.8 | 22.09 | 20.97 | 32.42 |
| 50493  | 'Txnrd1'        | 11.14 | 8.36  | 19   | 18.7 | 8.11 | 5.36  | 16.7 | 10.62 | 22.83 | 7.61  |
| 50496  | 'E2f6'          | 12.97 | 4.23  | 0.04 | 3.85 | 19.1 | 9.14  | 4.89 | 9.42  | 29.98 | 9.63  |
| 50497  | 'Hspa14'        | 20.09 | 14.99 | 31.9 | 26.3 | 37.4 | 51.48 | 25.6 | 43.03 | 43.85 | 34.5  |
| 50498  | 'Ebi3'          | 1.53  | 1.04  | 0.29 | 7.1  | 2.07 | 3.17  | 0    | 0     | 0     | 0     |
| 50500  | 'Ttpa'          | 0.59  | 2.14  | 0.52 | 0    | 0.02 | 0     | 2.76 | 1.26  | 2.03  | 0     |
| 50501  | 'Prok2'         | 10.15 | 17.27 | 5.35 | 15.9 | 0    | 0     | 1.19 | 11.25 | 1.89  | 0     |
| 50505  | 'Ercc4'         | 5.22  | 8.53  | 4.84 | 2.64 | 3.42 | 4.93  | 5.64 | 8.77  | 11.18 | 10.71 |
| 50518  | 'a'             | 0.11  | 0.07  | 0.03 | 0.02 | 0.02 | 0.01  | 0.11 | 0.68  | 0.96  | 0.07  |
| 50523  | 'Lats2'         | 0.38  | 0     | 0.59 | 0    | 0    | 0     | 0    | 0.2   | 0     | 0     |
| 50524  | 'Sall2'         | 8.08  | 8.78  | 13.8 | 2.74 | 6.6  | 5.36  | 3.86 | 4.98  | 5.13  | 3.09  |
| 50525  | 'Spag6l'        | 6.31  | 4.29  | 4.62 | 14.7 | 3.14 | 0.04  | 0.04 | 4.66  | 6.8   | 7.1   |
| 50527  | 'Ero1l'         | 16.53 | 8.48  | 14   | 8.83 | 7.75 | 8.47  | 8.47 | 7.9   | 10.91 | 6.19  |
| 50529  | 'Mrps7'         | 51.39 | 41.91 | 45.4 | 58.9 | 73.1 | 52.21 | 58.4 | 72.26 | 48.2  | 67.19 |
| 50530  | 'Mfap5'         | 0     | 0     | 0    | 0    | 1.99 | 0     | 0    | 0     | 0     | 0     |
| 50540  | 'Igbp1b'        | 2.68  | 4.94  | 0    | 6.73 | 0    | 0     | 0    | 3.16  | 0     | 0     |
| 50702  | 'Cfhr1'         | 0     | 0.03  | 0    | 0    | 0    | 0     | 0    | 0     | 0     | 0     |
| 50706  | 'Postn'         | 0     | 0     | 0    | 0    | 0    | 0     | 0    | 0     | 7.12  | 0     |
| 50708  | 'Hist1h1c'      | 0.96  | 3.03  | 6.76 | 0    | 9.43 | 3.88  | 3.38 | 2.48  | 2.34  | 5.54  |
| 50709  | 'Hist1h1e'      | 8.93  | 8.16  | 11   | 0    | 4.33 | 19.6  | 0    | 7.88  | 11.8  | 15.06 |
| 50720  | 'Sacs'          | 2.25  | 2.34  | 1.2  | 2.81 | 4.5  | 1.46  | 0.81 | 1.65  | 1.65  | 1.82  |
| 50721  | 'Sirt6'         | 14.25 | 15.69 | 28.2 | 35.2 | 22.7 | 19.77 | 28   | 17.79 | 24.92 | 20.98 |
| 50722  | 'Dkk1l'         | 3.38  | 7.53  | 1.89 | 0    | 0    | 0     | 0    | 5.16  | 21.63 | 3.07  |
| 50723  | 'Icosl'         | 0     | 1.04  | 0    | 0    | 0    | 0.05  | 0    | 0     | 0     | 0.38  |
| 50724  | 'Sap30l'        | 1.04  | 1.66  | 7.47 | 3.72 | 4.6  | 0.06  | 0    | 0.65  | 10.12 | 2.12  |
| 50753  | 'Fbxo8'         | 16.98 | 6.19  | 7.43 | 13.6 | 8.84 | 18.61 | 17.8 | 8.22  | 11.62 | 14.62 |
| 50754  | 'Fbxw7'         | 13.6  | 24.41 | 16.1 | 11.6 | 20.9 | 19.13 | 14.7 | 16.04 | 12.69 | 9.63  |
| 50755  | 'Fbh1'          | 32.05 | 22.06 | 32.8 | 39.4 | 26.9 | 6.54  | 31.2 | 30.41 | 15.39 | 28.77 |
| 50758  | 'Fbxl17'        | 1.6   | 2.7   | 2.27 | 3.49 | 2.32 | 0.57  | 1.36 | 1.78  | 1.34  | 1.89  |
| 50759  | 'Fbxo16'        | 2.34  | 9.14  | 15.6 | 14.4 | 23   | 33.04 | 10.4 | 13.63 | 6.44  | 12.02 |
| 50760  | 'Fbxo17'        | 6.11  | 0.18  | 6.71 | 9.54 | 1.88 | 7.11  | 4.16 | 0     | 5.88  | 12.92 |
| 50762  | 'Fbxo6'         | 13.55 | 48.04 | 17.9 | 6.12 | 49.5 | 35.58 | 65.1 | 33.48 | 27.82 | 32.59 |
| 50764  | 'Fbxo15'        | 0.05  | 0     | 0    | 0    | 0    | 0     | 0    | 0     | 0     | 0     |
| 50765  | 'Tfr2'          | 5.63  | 7.16  | 5.88 | 6.15 | 4.11 | 14.56 | 11.1 | 9.43  | 8.52  | 4.11  |
| 50766  | 'Crim1'         | 8.11  | 19.48 | 3.21 | 36.1 | 6.74 | 4.08  | 14.8 | 16.7  | 5.94  | 5.38  |
| 50767  | 'Pnpla6'        | 13.82 | 21.63 | 13.1 | 8.66 | 12   | 5.42  | 21.6 | 16.06 | 37.44 | 23.35 |
| 50768  | 'Dlc1'          | 2.33  | 0.35  | 3.23 | 2.47 | 1.28 | 0.87  | 2.36 | 2.28  | 2.62  | 1.03  |

|       |            |       |       |      |      |      |       |      |       |       |        |
|-------|------------|-------|-------|------|------|------|-------|------|-------|-------|--------|
| 50769 | 'Atp8a2'   | 15.24 | 21.31 | 12.5 | 3.02 | 15.3 | 10.21 | 26.6 | 13.66 | 17.28 | 18.91  |
| 50770 | 'Atp11a'   | 2.22  | 3.07  | 1.17 | 4.9  | 5.45 | 3.38  | 3.61 | 1.25  | 6.12  | 2.55   |
| 50771 | 'Atp9b'    | 5.48  | 3.49  | 19.7 | 0.11 | 14   | 3.98  | 15.3 | 8.38  | 14.86 | 11.55  |
| 50772 | 'Mapk6'    | 6.3   | 11.72 | 12.3 | 15.3 | 5.27 | 6.27  | 27.2 | 10.1  | 14.4  | 16.94  |
| 50773 | 'Nt5c'     | 103.5 | 99.81 | 79.6 | 53.2 | 175  | 171.5 | 92.5 | 102.7 | 73.15 | 122.19 |
| 50776 | 'Polg2'    | 2.88  | 4.4   | 0.74 | 1.24 | 1.36 | 10.67 | 5.49 | 1.49  | 0.61  | 4.89   |
| 50778 | 'Rgs1'     | 0     | 1.77  | 0    | 1.22 | 0    | 25.49 | 0    | 0     | 0     | 0      |
| 50779 | 'Rgs6'     | 0.57  | 0     | 0.13 | 1.26 | 2.29 | 3.6   | 0    | 0     | 3.25  | 0      |
| 50780 | 'Rgs3'     | 12.04 | 20.89 | 21.1 | 12.3 | 8.67 | 18.14 | 7.11 | 9.4   | 16.11 | 18.71  |
| 50781 | 'Dkk3'     | 5.06  | 13.73 | 13   | 2.99 | 6.62 | 1.73  | 5.43 | 17.81 | 26.06 | 26.58  |
| 50782 | 'Rgs11'    | 31.86 | 24.28 | 21.1 | 7.41 | 42   | 26.47 | 9.84 | 41.78 | 11.7  | 17.71  |
| 50783 | 'Lsm4'     | 98.77 | 55.26 | 93.3 | 266  | 78.9 | 24.11 | 52.9 | 50.01 | 84.76 | 26.9   |
| 50784 | 'Plpp2'    | 17.29 | 13.51 | 21.8 | 30.1 | 26.3 | 8.16  | 15   | 20.3  | 3.69  | 20.23  |
| 50785 | 'Hs6st1'   | 1.6   | 0.6   | 2.81 | 0.23 | 2.25 | 0     | 1.9  | 1.33  | 0.18  | 1.82   |
| 50786 | 'Hs6st2'   | 9.22  | 18.44 | 30.6 | 18.7 | 19.8 | 3.27  | 25.9 | 18.8  | 25.39 | 19.46  |
| 50787 | 'Hs6st3'   | 0     | 1.27  | 0.37 | 0    | 0.33 | 0     | 4.54 | 1.04  | 0     | 0      |
| 50788 | 'Fbxl8'    | 1.01  | 0     | 3.23 | 0    | 2.57 | 6.67  | 0    | 0.71  | 0     | 0      |
| 50789 | 'Fbxl3'    | 5.5   | 4.59  | 1.77 | 0.21 | 4.71 | 2.81  | 3.47 | 0.94  | 3.06  | 2.08   |
| 50790 | 'Acsl4'    | 9.56  | 7.96  | 8.74 | 5.86 | 7.29 | 4.95  | 3.22 | 10.55 | 14.43 | 7.98   |
| 50791 | 'Magi2'    | 2.56  | 3.98  | 4.01 | 9.12 | 8.77 | 5.54  | 8.18 | 4.85  | 4.2   | 5.23   |
| 50793 | 'Orc3'     | 34.92 | 33.58 | 23.2 | 3.21 | 11.5 | 26.67 | 25.6 | 24.96 | 18.25 | 17.41  |
| 50794 | 'Klf13'    | 19.24 | 23.85 | 12.8 | 37.8 | 31.3 | 21.07 | 20.4 | 29.3  | 14.82 | 19.07  |
| 50795 | 'Sh3bgr'   | 0.65  | 1.81  | 0.31 | 0    | 0    | 0.1   | 5.93 | 1.17  | 0.04  | 0.09   |
| 50797 | 'Copb2'    | 27.18 | 24.52 | 49.4 | 26.9 | 40.6 | 19.8  | 44.3 | 30.99 | 46.52 | 45.77  |
| 50798 | 'Gne'      | 14.49 | 12.25 | 13.3 | 10.9 | 16.3 | 12.05 | 13.3 | 26.05 | 28.87 | 13.51  |
| 50799 | 'Slc25a13' | 2.5   | 0.17  | 1.95 | 0.76 | 5.63 | 0     | 0.08 | 0.04  | 0.03  | 2.74   |
| 50817 | 'Capn15'   | 4.01  | 4.52  | 8.26 | 5.28 | 0.84 | 5.02  | 8.18 | 0.65  | 6.96  | 5.93   |
| 50849 | 'Rnf10'    | 11.2  | 19.94 | 21.8 | 16.2 | 12   | 17.39 | 13.3 | 10.97 | 7.9   | 2.95   |
| 50850 | 'Spast'    | 0.89  | 0.54  | 2.24 | 5.57 | 3.3  | 2.23  | 1.83 | 3.08  | 1.3   | 4.27   |
| 50868 | 'Keap1'    | 29.47 | 30.99 | 33.8 | 22.5 | 42.4 | 7.24  | 16.4 | 36    | 27.04 | 39.43  |
| 50873 | 'Prkn'     | 23.32 | 28.31 | 33.8 | 48.3 | 41.9 | 17.95 | 17.3 | 14.99 | 31.23 | 20.12  |
| 50874 | 'Tmod4'    | 0.13  | 0.27  | 0.16 | 0.12 | 0.1  | 0.09  | 0.07 | 1.19  | 0.05  | 0.07   |
| 50875 | 'Tmod3'    | 13.06 | 9.67  | 7.73 | 7.61 | 7.62 | 8.14  | 6.83 | 9.76  | 16.98 | 3.05   |
| 50876 | 'Tmod2'    | 22.08 | 22.09 | 17.7 | 17.4 | 19.4 | 10.7  | 21   | 18.97 | 17.29 | 13.58  |
| 50877 | 'Neu3'     | 2.45  | 2.29  | 4.52 | 4.4  | 5.44 | 2.31  | 4.21 | 3.41  | 2.56  | 2.1    |
| 50878 | 'Stag3'    | 0     | 0     | 1.46 | 0.92 | 0    | 0     | 0    | 1.17  | 0     | 0      |
| 50880 | 'Scly'     | 5.18  | 6.76  | 5.91 | 2.99 | 0.83 | 6.93  | 1.43 | 2.7   | 4.33  | 3.7    |
| 50883 | 'Chek2'    | 2     | 2.95  | 0.21 | 3.79 | 0.09 | 0.25  | 0.21 | 0.05  | 0.07  | 0.13   |
| 50884 | 'Nckap1'   | 9.94  | 20.26 | 12.8 | 25.3 | 17.2 | 11.9  | 15.6 | 11.62 | 11.27 | 14.12  |
| 50887 | 'Hmgn5'    | 3.31  | 3.34  | 4.68 | 6.54 | 1.17 | 3.22  | 4.35 | 1.43  | 4.26  | 4.55   |
| 50905 | 'Il17rb'   | 0     | 2.12  | 2.26 | 0    | 0    | 0     | 0    | 0     | 0     | 0.02   |
| 50907 | 'Preb'     | 30.45 | 31.65 | 29.2 | 29.6 | 25.5 | 38.19 | 41.3 | 25    | 30.86 | 24.52  |
| 50908 | 'C1s1'     | 0     | 0     | 0    | 0    | 0    | 0     | 0    | 0     | 0     | 0.63   |
| 50909 | 'C1ra'     | 0     | 0     | 0    | 0    | 0    | 0     | 0    | 0.01  | 0     | 0      |
| 50911 | 'Exosc9'   | 41.74 | 31.29 | 40.5 | 44.3 | 41   | 55.36 | 34.4 | 39.71 | 68.11 | 37.48  |
| 50912 | 'Exosc10'  | 33.27 | 26.09 | 31.9 | 38.8 | 42.4 | 20.92 | 22.2 | 24.5  | 19.37 | 12.52  |
| 50913 | 'Olig2'    | 0.52  | 0     | 8.06 | 4.84 | 0    | 0     | 1.98 | 0.18  | 0     | 0      |
| 50914 | 'Olig1'    | 34.59 | 28.07 | 163  | 29.7 | 16.2 | 48.15 | 256  | 52.04 | 7.26  | 2.37   |
| 50915 | 'Grb14'    | 13.66 | 13.89 | 4.26 | 0.03 | 31   | 27.13 | 32.1 | 14.86 | 37.02 | 10.57  |
| 50916 | 'Irx4'     | 0     | 0     | 0    | 0    | 0    | 0.02  | 0    | 0     | 0     | 0      |
| 50917 | 'Galns'    | 12.5  | 10.78 | 21   | 0    | 10.9 | 30.57 | 6.54 | 11.27 | 19.02 | 10.06  |
| 50918 | 'Myadm'    | 29.95 | 19.76 | 20.9 | 15.9 | 32.4 | 31.69 | 13.3 | 21.34 | 26.61 | 26.3   |
| 50926 | 'Hnrrpd1'  | 42.22 | 41.96 | 50.4 | 45.6 | 49.9 | 35.67 | 54.7 | 38.33 | 40.19 | 22.81  |
| 50927 | 'Nasp'     | 8.06  | 6.31  | 8.08 | 1.09 | 3.14 | 8.06  | 4.23 | 1.53  | 4.22  | 0.3    |
| 50928 | 'Klrg1'    | 0     | 0     | 0    | 0    | 3.48 | 0     | 0    | 0     | 7.14  | 0      |
| 50932 | 'Mink1'    | 1.65  | 2.87  | 0.81 | 1.02 | 2.84 | 1.7   | 2.74 | 3.13  | 1.94  | 1.52   |
| 50933 | 'Uchl3'    | 106.1 | 129.2 | 70.1 | 89.2 | 87.1 | 108.7 | 74.5 | 123   | 107.5 | 94.15  |
| 50934 | 'Slc7a8'   | 8.96  | 5.64  | 7.71 | 1.49 | 1.51 | 3.66  | 3.91 | 3.36  | 17.53 | 11.68  |

|       |              |       |       |      |      |      |       |      |       |       |        |
|-------|--------------|-------|-------|------|------|------|-------|------|-------|-------|--------|
| 50935 | 'St6galnac6' | 8.75  | 16.19 | 2.91 | 5.62 | 19.5 | 7.8   | 10.2 | 20.87 | 17.31 | 2.32   |
| 50995 | 'Uba2'       | 73.92 | 95.91 | 48.2 | 85   | 54.7 | 52.92 | 107  | 53.12 | 64.28 | 94.82  |
| 50996 | 'Pdcd7'      | 11.66 | 1.13  | 0.68 | 3.46 | 4.79 | 4.83  | 3.02 | 5.2   | 3.08  | 4.47   |
| 50997 | 'Mpp2'       | 9.54  | 11.54 | 7.7  | 9.81 | 12.4 | 8.86  | 5.73 | 6.85  | 24.1  | 10.46  |
| 51786 | 'Cpsf2'      | 4.45  | 6.35  | 12.4 | 12.6 | 9.2  | 2.51  | 1.74 | 5.84  | 6.79  | 12.48  |
| 51788 | 'H2afz'      | 394.7 | 358.2 | 318  | 437  | 479  | 551.1 | 495  | 458.3 | 300.4 | 372.5  |
| 51789 | 'Tnk2'       | 5.38  | 5.98  | 12.1 | 2.55 | 9.26 | 7.53  | 17.4 | 5.3   | 8.66  | 11.81  |
| 51791 | 'Rgs14'      | 9.61  | 8.76  | 7.2  | 9.25 | 9.32 | 10.68 | 11.9 | 21.09 | 9.67  | 8.52   |
| 51792 | 'Ppp2r1a'    | 500.9 | 460.7 | 555  | 350  | 404  | 505.2 | 552  | 567.7 | 471.1 | 565.93 |
| 51793 | 'Ddah2'      | 6.39  | 9.13  | 20.7 | 0.04 | 5.23 | 17.19 | 23.2 | 5.06  | 0     | 8.47   |
| 51795 | 'SrpX'       | 0     | 0     | 0    | 0    | 0    | 0     | 0    | 0     | 0     | 0.05   |
| 51796 | 'Srrm1'      | 24.68 | 28.38 | 32   | 54.8 | 32.3 | 31.58 | 28.9 | 27.37 | 34    | 32.52  |
| 51797 | 'Ctps'       | 32.47 | 21.37 | 28.9 | 36.7 | 14.5 | 23.24 | 18   | 40.3  | 24.19 | 17.66  |
| 51798 | 'Ech1'       | 93.42 | 70.07 | 80.6 | 184  | 124  | 95.23 | 54.5 | 50.36 | 60.81 | 55.44  |
| 51799 | 'Rundc3a'    | 17.14 | 16.57 | 9.86 | 36.3 | 37.7 | 12.17 | 21.8 | 30.72 | 26.05 | 19.98  |
| 51800 | 'Bok'        | 20.25 | 31.93 | 18.1 | 1.7  | 24.6 | 43.47 | 46.5 | 13.92 | 12.37 | 15.96  |
| 51801 | 'Ramp1'      | 47.67 | 18.69 | 29.2 | 22.1 | 14.7 | 37.44 | 30.3 | 41.15 | 16.77 | 14.84  |
| 51810 | 'Hnrnpu'     | 29.23 | 26.38 | 17.6 | 88.7 | 40.1 | 21.14 | 17   | 14.66 | 29.52 | 22.29  |
| 51812 | 'Mcrcs1'     | 36.1  | 41.19 | 41.6 | 49.4 | 31.9 | 31.87 | 40.6 | 49.4  | 22.9  | 16.66  |
| 51813 | 'CcnC'       | 38.09 | 42.81 | 49.3 | 33   | 18   | 61.07 | 29.3 | 32.5  | 20.59 | 27.4   |
| 51869 | 'Rif1'       | 1.47  | 0.76  | 0.19 | 4.87 | 1.83 | 1.19  | 1.58 | 1.63  | 0.5   | 2.07   |
| 51875 | 'Tmem141'    | 42.83 | 48.14 | 39.2 | 24.3 | 31.3 | 40.8  | 49.8 | 50.82 | 33.39 | 32.93  |
| 51885 | 'Tubgcp4'    | 9.42  | 13.04 | 6.29 | 0.94 | 3.65 | 7.02  | 7.75 | 6.42  | 15.98 | 9.94   |
| 51886 | 'Fubp1'      | 25.37 | 40.28 | 19.2 | 24.2 | 54.2 | 27.73 | 53.2 | 44.41 | 28.45 | 35.36  |
| 51897 | 'Atg13'      | 41.82 | 49.83 | 34.5 | 18.2 | 22.1 | 44.52 | 16.8 | 34.49 | 51.99 | 40.04  |
| 51902 | 'Rnf24'      | 5.13  | 0.37  | 3.02 | 4    | 0.72 | 4.66  | 4.72 | 4.09  | 5.93  | 2.54   |
| 51938 | 'CcDC39'     | 10.88 | 12.31 | 6.74 | 11.1 | 16.9 | 6.4   | 9.17 | 8.58  | 5.53  | 8.96   |
| 51944 | 'Knstrn'     | 0     | 0     | 0.45 | 0    | 0.34 | 0     | 0    | 0     | 0     | 0      |
| 51960 | 'Kctd18'     | 3.26  | 2.98  | 0.37 | 0.75 | 1.01 | 2.07  | 5.39 | 6.71  | 10.26 | 3.75   |
| 52004 | 'Cdk2ap2'    | 73.02 | 121.8 | 52   | 141  | 93.3 | 116.1 | 48.4 | 77.86 | 52.68 | 127.75 |
| 52009 | 'Jpt2'       | 43.83 | 47.09 | 12.5 | 39.4 | 26.7 | 16.19 | 6.97 | 9.75  | 43.36 | 34.55  |
| 52013 | 'R3hcc1l'    | 4.14  | 2.44  | 5.45 | 5.16 | 1.07 | 5.62  | 3.83 | 8.43  | 8.4   | 6.42   |
| 52014 | 'Nus1'       | 5.41  | 6.97  | 5.75 | 12.4 | 0.71 | 6.49  | 1.62 | 4.31  | 5.2   | 4.58   |
| 52020 | 'Umodl1'     | 0.68  | 0     | 0    | 0    | 0    | 0     | 0    | 0     | 0     | 0      |
| 52023 | 'Pibf1'      | 4.53  | 6.53  | 5.54 | 4.07 | 4.59 | 7.72  | 7.79 | 5.67  | 6.22  | 8.18   |
| 52028 | 'Bbs1'       | 4.59  | 2.79  | 0.99 | 2.91 | 2.03 | 0.57  | 5.28 | 3.82  | 5.06  | 1.92   |
| 52036 | 'Ppp6r3'     | 8.35  | 4.88  | 7.28 | 9.67 | 8.07 | 3.19  | 12.5 | 3.09  | 8.92  | 6      |
| 52040 | 'Ppp1r10'    | 10.88 | 14.31 | 17.1 | 15.5 | 26.5 | 17.44 | 22.5 | 9.96  | 14.08 | 37.12  |
| 52055 | 'Rab11fip5'  | 3.1   | 10.57 | 11   | 10.8 | 6.25 | 8.74  | 5.17 | 14.47 | 12.25 | 4.23   |
| 52064 | 'Coq5'       | 45.7  | 17.76 | 27.8 | 42   | 82.7 | 21.41 | 56.3 | 39.38 | 42.59 | 26.4   |
| 52065 | 'Mfhas1'     | 2.11  | 0.54  | 2.53 | 3.06 | 4.78 | 5.56  | 4.17 | 1.94  | 0.65  | 0.1    |
| 52076 | 'Tmem38b'    | 1.72  | 2.12  | 0.48 | 0    | 1.22 | 1.69  | 0    | 1.3   | 1.25  | 0.99   |
| 52118 | 'Pvr'        | 1.9   | 0.91  | 6.54 | 3.77 | 0    | 0     | 0    | 2.35  | 0     | 0.18   |
| 52120 | 'Hgsnat'     | 15.4  | 9.1   | 21.9 | 22.1 | 16.1 | 8.01  | 32.1 | 10.97 | 19.99 | 5.4    |
| 52123 | 'Agpat5'     | 6.45  | 13.29 | 9.03 | 12.7 | 7.34 | 16.93 | 21.7 | 4.8   | 9.29  | 7.73   |
| 52132 | 'CcDC97'     | 12.91 | 16.53 | 12.4 | 5.91 | 24.1 | 9.2   | 17.3 | 19.44 | 23.73 | 35.37  |
| 52150 | 'Kcnk6'      | 0.22  | 0.47  | 0.05 | 0.05 | 0.95 | 0.62  | 0.25 | 0     | 1.16  | 1.66   |
| 52163 | 'Camk1'      | 101   | 75.64 | 108  | 130  | 114  | 90.92 | 65.5 | 86.46 | 135   | 32.38  |
| 52174 | 'Tmem222'    | 195.5 | 183.4 | 151  | 129  | 152  | 212.4 | 187  | 162.2 | 159   | 218.7  |
| 52184 | 'Odf2l'      | 2.28  | 3.4   | 4.66 | 12.3 | 0.23 | 9.38  | 6.38 | 5.1   | 4.52  | 8.23   |
| 52187 | 'Rragd'      | 2.21  | 5.43  | 5.37 | 7.17 | 4.9  | 1.97  | 3.78 | 3.04  | 1.01  | 2.05   |
| 52202 | 'Rbm34'      | 18.02 | 9.75  | 10.6 | 26   | 22.8 | 18.88 | 37.9 | 14.76 | 7.58  | 20.97  |
| 52206 | 'Anapc4'     | 56.78 | 41.57 | 57.1 | 52.5 | 32.7 | 46.03 | 36.5 | 45.49 | 72.27 | 55.36  |
| 52231 | 'Ankzf1'     | 16.47 | 14.03 | 12.6 | 0    | 9.47 | 37.32 | 13.3 | 9.61  | 9.99  | 7.93   |
| 52245 | 'Commd2'     | 12.22 | 10.64 | 6.5  | 13.2 | 13   | 4.62  | 5.73 | 15.43 | 9.33  | 9.13   |
| 52250 | 'Reep1'      | 35.59 | 44.81 | 63.5 | 29.5 | 56.7 | 20.28 | 48.8 | 44.23 | 64.38 | 22.9   |
| 52276 | 'Cdca8'      | 1.23  | 0     | 2.57 | 0    | 1.1  | 0     | 0    | 0     | 0     | 0      |
| 52323 | 'Klhl7'      | 58.9  | 75.19 | 59.7 | 53.2 | 45.5 | 38.39 | 74   | 66.69 | 53.53 | 76.77  |

|       |              |       |       |      |      |      |       |      |       |       |         |
|-------|--------------|-------|-------|------|------|------|-------|------|-------|-------|---------|
| 52331 | 'Stbd1'      | 5.4   | 1.12  | 0    | 0    | 0    | 0     | 0    | 5.1   | 4.76  | 2.52    |
| 52335 | 'Atxn1'      | 0.01  | 1.14  | 0.28 | 0.04 | 1.01 | 0.94  | 0.01 | 0.1   | 0.63  | 0.01    |
| 52348 | 'Vps37a'     | 3.46  | 4.47  | 2.94 | 8.79 | 2.23 | 0.79  | 2.81 | 2.06  | 9.14  | 3.79    |
| 52357 | 'Wwc2'       | 0     | 2.58  | 0.66 | 0    | 3.6  | 1.56  | 2.81 | 1.14  | 4.79  | 2.43    |
| 52372 | 'D6ErtD527e' | 0.49  | 1.42  | 0    | 3.02 | 0.11 | 4.51  | 0    | 0.14  | 0     | 0       |
| 52377 | 'Rcn3'       | 3.22  | 2.93  | 9.88 | 2.02 | 0    | 0     | 11.5 | 0.08  | 3.69  | 6.68    |
| 52389 | 'Adgra1'     | 15.23 | 23.11 | 30   | 24.8 | 23.6 | 20.94 | 25.6 | 22.4  | 13.35 | 10      |
| 52392 | 'D1ErtD622e' | 17.12 | 11.07 | 4.17 | 5.05 | 9.75 | 4.79  | 5.04 | 7.32  | 9.26  | 10.63   |
| 52397 | 'Zfp644'     | 6.08  | 3.02  | 5.91 | 1.99 | 3.93 | 2.39  | 9.12 | 2.05  | 1.43  | 7.2     |
| 52398 | 'Sept11'     | 28.99 | 18.58 | 23.5 | 49.3 | 20.5 | 19.43 | 17.5 | 14.1  | 21.05 | 9.67    |
| 52428 | 'Rhpn2'      | 0.56  | 2.21  | 0    | 0    | 0.06 | 2.64  | 0.28 | 0.03  | 0     | 0       |
| 52430 | 'Echdc2'     | 4.16  | 9.48  | 1.77 | 0    | 1.28 | 13.1  | 10.5 | 6.28  | 25.87 | 13.38   |
| 52432 | 'Ppp2r2d'    | 5.44  | 11.74 | 8.85 | 35.9 | 19.9 | 2.83  | 2.34 | 18.29 | 5.37  | 18.62   |
| 52440 | 'Tax1bp1'    | 59.02 | 62.72 | 42.6 | 81.4 | 61.9 | 53.22 | 85.1 | 63.5  | 56.49 | 64.01   |
| 52443 | 'Mrpl48'     | 114.4 | 100.2 | 89.5 | 107  | 83.2 | 126.4 | 91.1 | 120.1 | 66.67 | 131.17  |
| 52463 | 'Tet1'       | 2.22  | 4.02  | 5.75 | 5.36 | 2.31 | 0.97  | 2.31 | 1.26  | 3.07  | 0.57    |
| 52466 | 'Slc46a1'    | 13.69 | 4.1   | 12.2 | 15.6 | 9.07 | 24.22 | 8.66 | 12.66 | 15    | 13.63   |
| 52468 | 'Ctdsp2'     | 0.01  | 0.71  | 4.45 | 1.91 | 0.21 | 0     | 1.51 | 0.7   | 0.49  | 0.23    |
| 52469 | 'Coa3'       | 262   | 406.2 | 277  | 463  | 337  | 368.9 | 399  | 447.4 | 416.2 | 415.14  |
| 52477 | 'Angel2'     | 14.97 | 18.52 | 14.5 | 24.8 | 12.9 | 21.38 | 14.7 | 15.04 | 22.86 | 9.38    |
| 52502 | 'Carhsp1'    | 18.78 | 12.88 | 7.12 | 3.21 | 31.4 | 6.95  | 8.03 | 18.57 | 9.42  | 9.83    |
| 52504 | 'Cenpo'      | 2.68  | 1.67  | 2.62 | 6.76 | 1.63 | 2.31  | 4.14 | 2.97  | 4.28  | 7.43    |
| 52513 | 'Ddx56'      | 45.76 | 40.82 | 35.8 | 64   | 31.8 | 48.74 | 53.1 | 75.74 | 55.27 | 49.81   |
| 52521 | 'Zfp622'     | 5.89  | 1.63  | 3    | 13.8 | 2.16 | 2.81  | 9.75 | 3.4   | 7.02  | 1.85    |
| 52530 | 'Nhp2'       | 34.35 | 16.5  | 41.5 | 15.2 | 56.7 | 58.15 | 36.5 | 51.64 | 59.65 | 53.88   |
| 52535 | 'Mettl17'    | 16.48 | 25.93 | 18.4 | 8.34 | 14.8 | 43.12 | 15.3 | 13.32 | 14.39 | 18.43   |
| 52538 | 'Acaa2'      | 20.73 | 22.28 | 3.12 | 18   | 5.65 | 12.82 | 13.9 | 5.36  | 4.21  | 7.46    |
| 52551 | 'Sgta'       | 137.3 | 156.9 | 153  | 201  | 137  | 184.1 | 248  | 229.6 | 163.2 | 234.13  |
| 52552 | 'Parp8'      | 6.13  | 17.31 | 3.37 | 11.9 | 1.32 | 3.05  | 8.87 | 7.76  | 13.05 | 9.36    |
| 52563 | 'Cdc23'      | 20.76 | 21.41 | 19   | 16.3 | 22.4 | 12.62 | 11.5 | 22.65 | 31.68 | 22.14   |
| 52570 | 'Ccadc69'    | 0     | 0     | 3.24 | 0    | 0    | 0     | 0    | 0     | 0     | 0       |
| 52575 | 'Trmt10c'    | 14.31 | 12.75 | 10.2 | 25.2 | 2.84 | 6.54  | 0.08 | 10.27 | 19.14 | 13.27   |
| 52585 | 'Dhrs1'      | 52.32 | 62.69 | 63.5 | 52.9 | 31.5 | 66.63 | 78.9 | 48.54 | 51.21 | 47.64   |
| 52588 | 'Tspan14'    | 2.48  | 4.03  | 0    | 6.09 | 0    | 10.47 | 5.95 | 17.56 | 6.66  | 8.54    |
| 52589 | 'Ncald'      | 104.3 | 210.7 | 129  | 113  | 124  | 88.64 | 179  | 116.2 | 70.57 | 59.83   |
| 52592 | 'Brms1l'     | 17.46 | 18.26 | 20.5 | 30.6 | 33.2 | 27.91 | 32.5 | 33.09 | 40.15 | 34.05   |
| 52609 | 'Cbx7'       | 11.73 | 2.52  | 10.1 | 10.4 | 18   | 20.15 | 22.7 | 7.69  | 9.28  | 1.99    |
| 52615 | 'Suz12'      | 4.66  | 0     | 1.91 | 5.91 | 2.5  | 1.93  | 0    | 1.03  | 0.21  | 2.66    |
| 52626 | 'Cdkn2aipnl' | 46.47 | 43.83 | 45.6 | 19.8 | 67.1 | 121.6 | 68.7 | 53.94 | 117.7 | 55.19   |
| 52633 | 'Nit2'       | 25.92 | 26.41 | 19.3 | 0.14 | 13.3 | 36.33 | 6.95 | 34.46 | 34.63 | 16.2    |
| 52635 | 'Esyt2'      | 1.83  | 1.98  | 1.01 | 2.47 | 2.21 | 1.95  | 3.77 | 1     | 3.78  | 3.06    |
| 52637 | 'Cisd1'      | 331.3 | 355.1 | 303  | 229  | 303  | 539.6 | 269  | 316.4 | 321.4 | 361.07  |
| 52639 | 'Wipi1'      | 6.12  | 8.45  | 1.81 | 0.57 | 3.19 | 2.22  | 12.9 | 3.3   | 8.78  | 20.44   |
| 52653 | 'Nudcd2'     | 21.65 | 18.83 | 14.9 | 0    | 15   | 10.94 | 19.9 | 18.48 | 18.21 | 16.76   |
| 52662 | 'Ldlrad4'    | 3.02  | 1.96  | 2.13 | 0.02 | 0.69 | 3.15  | 3    | 0.35  | 18.85 | 7.63    |
| 52665 | 'Echdc1'     | 7.43  | 11.18 | 7.55 | 24.2 | 5.19 | 8.92  | 13.2 | 8.73  | 6.85  | 4.12    |
| 52666 | 'Arhgef25'   | 7.4   | 3.07  | 6.09 | 10.6 | 8.04 | 23.97 | 8.17 | 8.19  | 14.3  | 11.42   |
| 52668 | 'Ifi27'      | 54.21 | 89.8  | 76.8 | 90   | 40.2 | 56.23 | 89.5 | 23.67 | 32.04 | 83.7    |
| 52670 | 'Cpsf4l'     | 0.1   | 0.11  | 0.07 | 0    | 0.22 | 0     | 0.08 | 0     | 0.09  | 0.01    |
| 52679 | 'E2f7'       | 0     | 0     | 0.07 | 3.03 | 0    | 0.01  | 0    | 0     | 0     | 0       |
| 52683 | 'Ncaph2'     | 36.32 | 46.44 | 66.1 | 57.9 | 77   | 71.35 | 103  | 87.08 | 40.56 | 71.77   |
| 52685 | 'Cd300lg'    | 0.65  | 2.83  | 0.92 | 0.24 | 0.36 | 0.39  | 0    | 0.29  | 0.49  | 0.92    |
| 52686 | 'Mettl2'     | 9.81  | 16.15 | 22.8 | 15   | 11.4 | 14.3  | 21.2 | 17.54 | 17.7  | 12.45   |
| 52690 | 'Setd3'      | 45.07 | 32.62 | 44.9 | 42.8 | 28.3 | 32.31 | 51.8 | 32.63 | 19.38 | 39.73   |
| 52696 | 'Zwint'      | 2240  | 2084  | 1980 | 2406 | 1999 | 3004  | 2491 | 2838  | 2435  | 2082.48 |
| 52700 | 'Txndc17'    | 89.55 | 89.1  | 76.5 | 78.3 | 83   | 80.11 | 63.9 | 69.66 | 88.83 | 89.97   |
| 52705 | 'Krr1'       | 8.52  | 10.72 | 5.34 | 12.1 | 8.1  | 10.57 | 7.65 | 6.61  | 4.32  | 6.18    |
| 52708 | 'Zfp410'     | 38.2  | 23.13 | 30.3 | 2.12 | 11.3 | 6.52  | 15.3 | 20.72 | 25.35 | 7.89    |

|       |             |       |       |      |      |      |       |      |       |       |        |
|-------|-------------|-------|-------|------|------|------|-------|------|-------|-------|--------|
| 52710 | 'Slc52a2'   | 8.38  | 4.8   | 6.95 | 4.65 | 8.2  | 6.82  | 3.77 | 2.98  | 7.38  | 9.81   |
| 52712 | 'Zkscan6'   | 14.34 | 5.03  | 13.1 | 6.63 | 3.68 | 13.23 | 6.73 | 7.75  | 18.25 | 12.83  |
| 52713 | 'Ccadc59'   | 31.83 | 24.16 | 22.4 | 61.3 | 28.4 | 36.93 | 31.4 | 39.52 | 39.9  | 38.02  |
| 52715 | 'Ccadc43'   | 4.49  | 10.73 | 5.07 | 22.2 | 17.2 | 9.58  | 6.07 | 11.62 | 27    | 11.96  |
| 52717 | 'Anapc16'   | 44.42 | 78.84 | 31.9 | 27.8 | 63.7 | 90.53 | 69.6 | 57.3  | 48.83 | 88.47  |
| 52808 | 'Tspyl2'    | 97.12 | 104   | 99.8 | 97.6 | 89.5 | 98.78 | 116  | 99.55 | 145.5 | 93.14  |
| 52815 | 'Ldhd'      | 11.3  | 8.79  | 16.5 | 0    | 9.3  | 0     | 3.35 | 15.29 | 7.46  | 10.28  |
| 52822 | 'Rufy3'     | 89.08 | 96.44 | 62   | 94.6 | 45.4 | 84.92 | 86.2 | 91.32 | 71.86 | 73.92  |
| 52829 | 'Lurap11'   | 13.99 | 10.2  | 0.97 | 0    | 21.6 | 20.95 | 12   | 9.63  | 10.56 | 6.98   |
| 52830 | 'Pnrc2'     | 38.19 | 6.27  | 15.1 | 64   | 45.4 | 38.89 | 18.2 | 29.63 | 37.09 | 46.12  |
| 52837 | 'Tmx4'      | 99.88 | 72.23 | 162  | 103  | 64.8 | 55.96 | 100  | 84.78 | 101.7 | 119.65 |
| 52838 | 'Dnlz'      | 8.75  | 8.3   | 12   | 6.14 | 10.3 | 14.17 | 10.6 | 10.1  | 11.57 | 6.66   |
| 52840 | 'Dbnnd2'    | 22.63 | 24.38 | 6.16 | 6.83 | 117  | 29.2  | 19.7 | 9.07  | 10.08 | 9.09   |
| 52846 | 'Cnot11'    | 2.62  | 0.42  | 0.08 | 2.9  | 4.29 | 0     | 0.27 | 4.52  | 2.55  | 0.01   |
| 52850 | 'Sgsm1'     | 47.8  | 57.99 | 50.3 | 41   | 39.1 | 18.78 | 28.7 | 46.67 | 31.7  | 80.19  |
| 52855 | 'Lair1'     | 3.65  | 0.75  | 0    | 0.28 | 3.61 | 6.28  | 1.98 | 0     | 0     | 0      |
| 52856 | 'Mtg2'      | 27.81 | 14.13 | 8.05 | 34.9 | 10.5 | 17.57 | 7.48 | 22.21 | 33.51 | 8.16   |
| 52857 | 'Gramd1a'   | 22.8  | 24.22 | 25.6 | 17.9 | 29.7 | 28.33 | 12.2 | 19.15 | 25.83 | 11.32  |
| 52858 | 'Cdip1'     | 125.5 | 90.29 | 81.6 | 78.9 | 117  | 124.8 | 147  | 104.8 | 82.08 | 139.76 |
| 52864 | 'Slx4'      | 2.5   | 0.54  | 2.2  | 0.01 | 0.19 | 0.61  | 4.85 | 2.12  | 4.72  | 4.68   |
| 52874 | 'Pum3'      | 18.54 | 15.33 | 16.2 | 15.7 | 7.63 | 17.6  | 10.9 | 10.55 | 8.34  | 20.93  |
| 52882 | 'Rgs7bp'    | 8.26  | 4.51  | 9.51 | 5.07 | 9.13 | 7.48  | 6.64 | 10.88 | 6.93  | 4.67   |
| 52892 | 'Sco1'      | 1.61  | 3.77  | 4.27 | 0.73 | 4.02 | 9.06  | 5.54 | 3.55  | 7.94  | 0.39   |
| 52897 | 'Rbfox3'    | 37.37 | 15.47 | 18.6 | 23.4 | 23.1 | 26.51 | 22.7 | 18.46 | 22.78 | 15.5   |
| 52898 | 'Rnasek'    | 879.1 | 1226  | 784  | 714  | 760  | 903.3 | 768  | 754.6 | 745.6 | 954.55 |
| 52906 | 'Ahi1'      | 290.3 | 261.6 | 275  | 228  | 202  | 226.4 | 343  | 241   | 328   | 321.75 |
| 52915 | 'Zmiz2'     | 7.8   | 2.81  | 7.02 | 2.45 | 16.3 | 1.34  | 4.03 | 7.23  | 14.17 | 1.58   |
| 53310 | 'Dlg3'      | 0.37  | 1.5   | 2.38 | 2.3  | 4.09 | 0     | 0.27 | 0.91  | 1.31  | 2.84   |
| 53312 | 'Nub1'      | 27.59 | 25.63 | 41.6 | 43.8 | 25.6 | 16.81 | 30   | 31.81 | 43.39 | 41.15  |
| 53313 | 'Atp2a3'    | 0     | 0     | 0    | 0    | 0    | 0     | 0.01 | 0     | 0     | 0      |
| 53317 | 'Plrg1'     | 43.13 | 27.89 | 52.2 | 41.8 | 34.2 | 43.72 | 37.8 | 72.99 | 67.49 | 80.73  |
| 53318 | 'Pdim3'     | 0     | 0.03  | 1.74 | 0    | 0    | 0     | 0    | 0.72  | 0     | 0      |
| 53319 | 'Nxf1'      | 71.61 | 86.08 | 69.4 | 103  | 54.3 | 53.02 | 53   | 70.54 | 89.61 | 87.23  |
| 53320 | 'Folh1'     | 4.22  | 2.52  | 0    | 2.5  | 0.4  | 2.45  | 4.84 | 1.16  | 0     | 0      |
| 53321 | 'Cntnap1'   | 5.27  | 3.49  | 5.5  | 1.83 | 10.1 | 2.67  | 15.8 | 7.94  | 11.53 | 8.36   |
| 53322 | 'Nucb2'     | 34.2  | 36.94 | 10.7 | 73.7 | 20.6 | 15.42 | 37.2 | 17.66 | 40.4  | 48.18  |
| 53323 | 'Ube2k'     | 20.14 | 21.1  | 23.2 | 32.8 | 25.8 | 29.4  | 22.8 | 30.07 | 30.55 | 27.06  |
| 53324 | 'Nptx2'     | 0     | 0.81  | 2.27 | 4.06 | 0    | 0     | 0    | 1.56  | 3.16  | 0.53   |
| 53325 | 'Banp'      | 24.97 | 29.07 | 20   | 6.65 | 14.5 | 27.91 | 4.08 | 26.52 | 13.9  | 13.52  |
| 53328 | 'Pgrmc1'    | 810.5 | 1100  | 679  | 595  | 735  | 753   | 997  | 845.9 | 617.9 | 812.9  |
| 53330 | 'Vamp4'     | 36.46 | 35.17 | 33.2 | 54.1 | 39.3 | 34.68 | 24.7 | 39.67 | 60.54 | 53.11  |
| 53331 | 'Stx7'      | 134   | 117.7 | 95.7 | 117  | 112  | 124.7 | 134  | 101.7 | 101.2 | 88.39  |
| 53332 | 'Mtmr1'     | 0.02  | 2.41  | 0.23 | 1.92 | 0.06 | 1.19  | 0    | 1.86  | 2.03  | 1.33   |
| 53333 | 'Tom40'     | 107.5 | 84.03 | 154  | 104  | 115  | 177.7 | 109  | 100.1 | 157.4 | 56.76  |
| 53334 | 'Gosr1'     | 24.03 | 14.43 | 21.3 | 15.2 | 13.7 | 13.83 | 22.6 | 19.59 | 14.9  | 32.25  |
| 53356 | 'Eif3g'     | 188   | 118.6 | 152  | 144  | 152  | 169   | 133  | 161.8 | 139.9 | 144.94 |
| 53357 | 'Pla2g6'    | 17.04 | 13.48 | 5.78 | 0.96 | 20.2 | 10.69 | 17.1 | 10.14 | 29.12 | 9.94   |
| 53374 | 'Chst3'     | 0     | 0.01  | 1.43 | 1.15 | 0.27 | 0.02  | 0.01 | 0     | 0.01  | 0.01   |
| 53375 | 'Mtx2'      | 67.41 | 73.44 | 60.4 | 99.3 | 54.4 | 65.9  | 70.4 | 47.92 | 100.3 | 40.89  |
| 53376 | 'Usp2'      | 7.21  | 10.5  | 22.9 | 20.1 | 5.84 | 17.02 | 8.13 | 4.27  | 6.84  | 9.27   |
| 53378 | 'Sdcbp'     | 272.2 | 424.5 | 150  | 341  | 284  | 269.5 | 141  | 235.5 | 271.3 | 293.09 |
| 53379 | 'Hnrnpa2b1' | 205.7 | 253.9 | 142  | 133  | 233  | 196.6 | 168  | 192.2 | 185.5 | 210.13 |
| 53380 | 'Psm10'     | 53.38 | 39.98 | 43.4 | 35.4 | 41.7 | 67.56 | 35.8 | 42.11 | 48.53 | 56.11  |
| 53381 | 'Prdx4'     | 30.38 | 53.86 | 46.5 | 46   | 21.3 | 59.59 | 63.7 | 43.2  | 55.84 | 64.33  |
| 53382 | 'Txnl1'     | 65.16 | 84.96 | 92.3 | 56.9 | 64.7 | 68.51 | 79.3 | 79    | 69.88 | 74.68  |
| 53404 | 'Atoh7'     | 0     | 0     | 3.74 | 0.77 | 2.62 | 4.79  | 5.47 | 3.69  | 1.77  | 0      |
| 53412 | 'Ppp1r3c'   | 7.11  | 2.67  | 0.11 | 13.8 | 0.04 | 2.59  | 6.17 | 4.49  | 4.28  | 0      |
| 53413 | 'Exoc7'     | 42.35 | 41.24 | 34.1 | 49.6 | 49.3 | 30.77 | 72.4 | 44.91 | 61.01 | 61.63  |

|       |           |       |       |      |      |      |       |      |       |       |        |
|-------|-----------|-------|-------|------|------|------|-------|------|-------|-------|--------|
| 53414 | 'Bysl'    | 7.27  | 7.51  | 9.84 | 24.2 | 7.11 | 9.53  | 15.4 | 14.99 | 4.98  | 11.64  |
| 53415 | 'Htati2'  | 25.2  | 20.58 | 16.1 | 42.8 | 1.31 | 24.09 | 3.75 | 25.15 | 25.01 | 35.87  |
| 53416 | 'Stk39'   | 4.98  | 3.42  | 5.28 | 6.35 | 9.77 | 3.23  | 4.06 | 4.21  | 2.17  | 2.16   |
| 53417 | 'Hif3a'   | 1.18  | 0     | 0    | 0    | 0    | 0     | 0    | 0.01  | 0     | 0      |
| 53418 | 'B4galt2' | 2.71  | 0.06  | 0    | 3.54 | 2.38 | 0.02  | 3.56 | 2.26  | 2.79  | 1.76   |
| 53419 | 'Corin'   | 0.03  | 3.01  | 0.02 | 0    | 0.01 | 0.01  | 0    | 0     | 0.01  | 0      |
| 53420 | 'Syt5'    | 312.4 | 424.7 | 334  | 274  | 355  | 283   | 177  | 373   | 399.6 | 562.34 |
| 53421 | 'Sec61a1' | 13.35 | 13.07 | 21.7 | 14.7 | 7.64 | 18.52 | 11.8 | 6.69  | 33.86 | 17.24  |
| 53422 | 'Ybx2'    | 0     | 0     | 0    | 0    | 0    | 4.11  | 0    | 0.56  | 0     | 0      |
| 53424 | 'Tsnax'   | 146.6 | 137.4 | 149  | 150  | 138  | 115.6 | 141  | 182.2 | 125.5 | 188.18 |
| 53598 | 'Dctn3'   | 376.4 | 356.4 | 301  | 306  | 280  | 429.3 | 317  | 399.9 | 364.8 | 403.53 |
| 53599 | 'Cd164'   | 28.58 | 50.25 | 28.9 | 14.5 | 20.5 | 20.1  | 17.4 | 34.55 | 61.84 | 61.62  |
| 53600 | 'Timm23'  | 138.8 | 202.2 | 183  | 204  | 156  | 285   | 206  | 249.3 | 182.1 | 161.16 |
| 53602 | 'Hpcal1'  | 258.9 | 309.8 | 344  | 816  | 147  | 329   | 164  | 300.7 | 326   | 391.85 |
| 53603 | 'Tslp'    | 0     | 0     | 0.04 | 0    | 0    | 0     | 0    | 0     | 0     | 0      |
| 53604 | 'Zbp1'    | 0     | 0     | 0.99 | 0    | 0    | 1.7   | 0    | 0.05  | 0     | 0      |
| 53605 | 'Nap111'  | 83.94 | 119.6 | 61.1 | 104  | 68.9 | 84.49 | 116  | 81.34 | 93.12 | 70.24  |
| 53607 | 'Snrpa'   | 135.1 | 79.64 | 77.9 | 76.4 | 119  | 133.3 | 103  | 105.3 | 134.3 | 110.72 |
| 53608 | 'Map3k6'  | 1.11  | 0     | 0.73 | 3.09 | 0    | 0     | 1.65 | 0     | 0     | 1.04   |
| 53609 | 'Clasrp'  | 25.93 | 24.16 | 47.4 | 30   | 24.3 | 28.29 | 26.5 | 18.95 | 27.48 | 11.39  |
| 53610 | 'Nono'    | 58.54 | 82.7  | 71.4 | 52.2 | 50   | 60.33 | 92.1 | 58    | 50.32 | 60.6   |
| 53611 | 'Vti1a'   | 6.2   | 8.78  | 7.49 | 9.29 | 12.1 | 5.21  | 13.4 | 11.22 | 15.65 | 10.96  |
| 53612 | 'Vti1b'   | 238.4 | 272.6 | 175  | 275  | 267  | 318   | 248  | 244.2 | 287   | 376.48 |
| 53614 | 'Reck'    | 0.02  | 0.53  | 0.01 | 3.78 | 3.06 | 0     | 0    | 0     | 0.95  | 0      |
| 53618 | 'Fut8'    | 64.04 | 36.67 | 41.2 | 47.6 | 31.8 | 40.24 | 47.5 | 40.8  | 47.81 | 17.91  |
| 53619 | 'Blcap'   | 312.6 | 295   | 270  | 206  | 282  | 283.1 | 318  | 309.7 | 270.4 | 393.66 |
| 53620 | 'Vamp5'   | 0     | 1.56  | 0.09 | 0    | 3.62 | 0.06  | 2.57 | 0     | 0.03  | 0      |
| 53621 | 'Cnot4'   | 23.43 | 20.13 | 16.1 | 11.7 | 8.21 | 8.18  | 10.1 | 13.94 | 5.82  | 17.85  |
| 53623 | 'Gria3'   | 10.68 | 30.5  | 18.9 | 12.8 | 16.7 | 12.88 | 17.1 | 17.7  | 6.6   | 26.6   |
| 53624 | 'Cldn7'   | 0     | 0     | 0    | 0.06 | 12.4 | 5.34  | 0.84 | 0     | 0.59  | 2.06   |
| 53625 | 'B3gnt2'  | 21.52 | 18.6  | 7.69 | 27.9 | 31.1 | 4.01  | 0.06 | 8.27  | 1.27  | 2.94   |
| 53626 | 'Insm1'   | 0.4   | 0     | 0.05 | 0    | 0    | 0.57  | 0.07 | 0.05  | 0     | 0.15   |
| 53627 | 'Porcn'   | 31.51 | 34.41 | 47.8 | 7.33 | 30   | 18.18 | 52.6 | 45.63 | 1.69  | 14.05  |
| 53761 | 'Prcc2a'  | 6.74  | 7.77  | 4.76 | 8.34 | 8.77 | 2.3   | 9.46 | 4.8   | 10.9  | 6.47   |
| 53814 | 'Oaz3'    | 0.15  | 0.11  | 0    | 0    | 0    | 0.6   | 0.55 | 0.23  | 0     | 0      |
| 53817 | 'Ddx39b'  | 116.5 | 110   | 126  | 110  | 96.7 | 183.7 | 103  | 155.6 | 129.5 | 116.83 |
| 53857 | 'Tuba8'   | 10.93 | 15.12 | 2.95 | 44.6 | 3.09 | 0     | 0.1  | 16.91 | 5.78  | 9.78   |
| 53858 | 'Rwdd2b'  | 4.48  | 13.93 | 2.83 | 0    | 7.72 | 5.08  | 16.1 | 2.9   | 0     | 6.22   |
| 53859 | 'Map3k14' | 0.01  | 3.42  | 0    | 0    | 0.37 | 0     | 3.35 | 0.44  | 1.02  | 0.26   |
| 53860 | 'Sept9'   | 7.34  | 10.5  | 10.8 | 7.7  | 12.3 | 14.5  | 24   | 15.59 | 18.03 | 12.69  |
| 53861 | 'Zranb2'  | 50.54 | 39.93 | 34   | 47.9 | 52.6 | 56.54 | 51.1 | 49.62 | 49.8  | 45.11  |
| 53867 | 'Col5a3'  | 0     | 0     | 1.67 | 0    | 0    | 0     | 0    | 0     | 0     | 0      |
| 53868 | 'Rab25'   | 0     | 0     | 0    | 0    | 16.8 | 0     | 0    | 0     | 0     | 0      |
| 53869 | 'Rab11a'  | 161.6 | 166.8 | 164  | 96   | 126  | 196.4 | 153  | 182.1 | 191.2 | 185.16 |
| 53870 | 'Cntn6'   | 21.93 | 3.01  | 4.87 | 9.07 | 11.4 | 15.9  | 21.4 | 8.81  | 19.73 | 22.38  |
| 53871 | 'Pkd2l2'  | 0     | 0.22  | 0.02 | 3.06 | 0.09 | 0.02  | 0    | 0     | 0     | 2.39   |
| 53872 | 'Caprin1' | 30.05 | 44.65 | 48.4 | 28.6 | 15.1 | 11.78 | 34.7 | 33.52 | 38.74 | 36.41  |
| 53881 | 'Slc5a3'  | 3.09  | 2.22  | 1.95 | 5.28 | 3.87 | 1.67  | 5.82 | 4.82  | 5.46  | 4.81   |
| 53883 | 'Celsr2'  | 6.69  | 5.8   | 12.8 | 12.9 | 10.9 | 10.54 | 9.96 | 7.89  | 4.04  | 6.27   |
| 53885 | 'Nphp1'   | 10.62 | 17.39 | 15.8 | 34   | 9.32 | 8.16  | 19.9 | 16.01 | 9.12  | 7.92   |
| 53886 | 'Cdkl2'   | 27.41 | 26.63 | 4.73 | 19.7 | 32.2 | 8.41  | 4.33 | 20.15 | 23.28 | 14.06  |
| 53890 | 'Sart3'   | 3.32  | 0.62  | 4.2  | 14.6 | 12   | 9.49  | 2.55 | 0.36  | 11.97 | 4.7    |
| 53892 | 'Ppm1d'   | 0.87  | 0.54  | 0.99 | 1.66 | 4.25 | 0     | 0    | 0.08  | 3.32  | 0      |
| 53893 | 'Nudt5'   | 6.83  | 11.21 | 4.12 | 4.64 | 3.06 | 8.61  | 0.22 | 8.58  | 10.28 | 7.64   |
| 53895 | 'Clpp'    | 161.6 | 164.9 | 150  | 192  | 179  | 223.7 | 168  | 213.4 | 223.4 | 136.19 |
| 53896 | 'Slc7a10' | 24.56 | 16.77 | 10.5 | 21.7 | 6.03 | 8.39  | 5.98 | 5.25  | 15.89 | 0.02   |
| 53897 | 'Gal3st1' | 1.37  | 0.11  | 6.53 | 0    | 3.24 | 7.62  | 1.1  | 5.11  | 3.94  | 0.94   |
| 53901 | 'Rcan2'   | 89.71 | 58.15 | 86.5 | 28.7 | 44.6 | 25.91 | 125  | 84.09 | 60.24 | 32.92  |



|        |            |       |       |      |      |      |       |      |       |       |        |
|--------|------------|-------|-------|------|------|------|-------|------|-------|-------|--------|
| 53902  | 'Rcan3'    | 5.75  | 4.02  | 14.7 | 2.76 | 7.13 | 6.51  | 11   | 4.07  | 9.85  | 3.99   |
| 53945  | 'Slc40a1'  | 0     | 0     | 0.01 | 0    | 0.03 | 0.12  | 3.31 | 0     | 1.83  | 1.94   |
| 53951  | 'Gpatch11' | 13.61 | 8.98  | 7.54 | 9.04 | 3.76 | 6.54  | 2.67 | 6.05  | 12.9  | 5.51   |
| 53970  | 'Rfx5'     | 0.75  | 0.18  | 0.18 | 3.19 | 1.74 | 2.63  | 2.5  | 2.53  | 2.45  | 2.51   |
| 53972  | 'Ngef'     | 42.73 | 44.05 | 44.7 | 35.9 | 22.4 | 52.94 | 31.4 | 43.46 | 25.37 | 35.42  |
| 53975  | 'Ddx20'    | 4.02  | 5.79  | 7.39 | 0.05 | 3.29 | 11.56 | 4.13 | 11.17 | 11.49 | 14.96  |
| 53978  | 'Lpar2'    | 0     | 0.02  | 0.01 | 0    | 0    | 0     | 2.12 | 0     | 1.15  | 0      |
| 54003  | 'Nell2'    | 64.82 | 44.64 | 40.1 | 141  | 22   | 25.9  | 87   | 63.91 | 48.42 | 21.69  |
| 54004  | 'Diaph2'   | 0.12  | 0.38  | 0.1  | 0.03 | 0    | 0.32  | 0.07 | 0.05  | 0     | 0.38   |
| 54006  | 'Deaf1'    | 32.11 | 22.84 | 64.9 | 27.6 | 34.6 | 28.95 | 26.8 | 23.68 | 33.5  | 6.95   |
| 54120  | 'Gipc2'    | 4.68  | 3.38  | 9.76 | 5.31 | 2.86 | 11.8  | 10.2 | 5.73  | 2.58  | 5.2    |
| 54122  | 'Uevld'    | 3.35  | 6.39  | 4.72 | 4.14 | 0.04 | 4.92  | 3.17 | 2.35  | 11.4  | 6.13   |
| 54123  | 'Irf7'     | 0     | 1.91  | 5.94 | 16.3 | 7.87 | 2.31  | 0    | 0.3   | 6.05  | 1.62   |
| 54124  | 'Cks1b'    | 3.23  | 12.96 | 0.27 | 14.1 | 6.19 | 6.7   | 0.07 | 0.06  | 0     | 9.3    |
| 54125  | 'Polm'     | 2.72  | 5.74  | 2.25 | 0    | 0    | 0     | 2.29 | 5.12  | 4.61  | 1.57   |
| 54126  | 'Arhgef7'  | 8.38  | 15.32 | 13.7 | 9.53 | 6.9  | 9.94  | 6.27 | 10.72 | 16.38 | 24.29  |
| 54127  | 'Rps28'    | 103.4 | 186.1 | 240  | 279  | 83.7 | 329.4 | 171  | 67.33 | 166.1 | 77.63  |
| 54128  | 'Pmm2'     | 5     | 20.52 | 12.8 | 12.3 | 10.7 | 19.62 | 19.5 | 10.05 | 0.13  | 5.6    |
| 54130  | 'Actr1a'   | 126.5 | 101.1 | 131  | 97.6 | 77.6 | 89.68 | 149  | 125.8 | 114.2 | 183.2  |
| 54131  | 'Irf3'     | 16.55 | 12.74 | 14.7 | 10.6 | 31.8 | 2.1   | 0.07 | 9.16  | 8.88  | 23.09  |
| 54132  | 'Pdlim1'   | 0     | 0.03  | 0.03 | 0    | 4.01 | 0     | 0    | 0     | 0     | 0      |
| 54135  | 'Lsr'      | 0     | 0.05  | 0    | 0    | 5.7  | 4.43  | 0.03 | 0     | 0.02  | 0      |
| 54137  | 'Acrbp'    | 2.83  | 4.74  | 5.7  | 0    | 11.8 | 3.53  | 13.2 | 0     | 8.58  | 16.06  |
| 54138  | 'Atxn10'   | 218   | 243.5 | 301  | 297  | 231  | 222.2 | 321  | 259   | 251.3 | 274.5  |
| 54139  | 'Irf6'     | 0     | 0.02  | 0    | 0    | 0    | 0     | 0    | 0     | 0     | 0      |
| 54140  | 'Avpr1a'   | 0.88  | 0     | 0    | 0    | 0.02 | 1.25  | 19.7 | 0     | 3.63  | 2.14   |
| 54141  | 'Spag5'    | 2.2   | 0.08  | 0    | 2.34 | 1.56 | 0     | 0    | 0     | 0     | 0      |
| 54151  | 'Cyhr1'    | 49.76 | 66.82 | 56.3 | 6.62 | 64.6 | 54.4  | 59.4 | 36.29 | 50.85 | 50.78  |
| 54152  | 'Dnal4'    | 37.03 | 39.27 | 64.6 | 18.4 | 75.6 | 33.86 | 39.9 | 60.79 | 101.3 | 57.9   |
| 54153  | 'Rasa4'    | 7.64  | 11.79 | 8.25 | 7.54 | 9.97 | 10.48 | 1.87 | 6.42  | 14.5  | 7.36   |
| 54156  | 'Egfl6'    | 4.52  | 1.86  | 8.03 | 0    | 0.16 | 1.34  | 0    | 1.21  | 0     | 0      |
| 54160  | 'Copg2'    | 29.21 | 13.97 | 28.6 | 5.62 | 18.2 | 22.77 | 43.5 | 34.6  | 58.5  | 37.32  |
| 54161  | 'Copg1'    | 188.2 | 228.3 | 249  | 128  | 178  | 143.1 | 238  | 208.6 | 202.9 | 230.63 |
| 541610 | 'Trcg1'    | 0     | 0     | 0    | 0    | 0    | 0     | 0    | 0     | 0     | 0.08   |
| 54169  | 'Kat6b'    | 4.14  | 7.69  | 3.16 | 4.69 | 3.37 | 1.32  | 5.38 | 1.21  | 1.78  | 2.49   |
| 54170  | 'Rragc'    | 13.98 | 4.18  | 17.7 | 21.4 | 3.25 | 8.89  | 15.1 | 11.15 | 19.26 | 6.25   |
| 54188  | 'Cpsf4'    | 16.01 | 8.37  | 8.39 | 5.09 | 8.79 | 3.4   | 9.61 | 9.72  | 10.34 | 3.4    |
| 54189  | 'Rabep1'   | 13.98 | 11.87 | 15.7 | 18.4 | 9.08 | 5.97  | 19.8 | 15.66 | 13.58 | 9.47   |
| 54194  | 'Akap8l'   | 110   | 147.6 | 106  | 150  | 127  | 141.6 | 134  | 128.2 | 137.1 | 158.65 |
| 54195  | 'Gucy1b1'  | 62.91 | 61.75 | 35.4 | 30.9 | 69.1 | 40.4  | 83.7 | 75.32 | 78.33 | 76.17  |
| 54196  | 'Pabpn1'   | 27.05 | 18.24 | 18.5 | 22.7 | 31.3 | 51.69 | 28.1 | 40.35 | 21.71 | 22.91  |
| 54197  | 'Rnf5'     | 113.4 | 128   | 122  | 128  | 161  | 94.37 | 173  | 177.7 | 93.11 | 130.3  |
| 54198  | 'Snx3'     | 332   | 236.9 | 216  | 214  | 179  | 342.7 | 385  | 240.3 | 245.6 | 207.32 |
| 54199  | 'Ccr12'    | 0.03  | 0     | 0    | 0    | 0    | 18.05 | 0    | 0.02  | 0     | 0      |
| 54200  | 'Sult2b1'  | 4.25  | 2.01  | 10.1 | 9.01 | 10.3 | 14.56 | 9.12 | 12.06 | 0     | 17.02  |
| 54201  | 'Zfp316'   | 1.56  | 2.2   | 3.73 | 3.11 | 2.91 | 2.42  | 1.29 | 2.2   | 1.37  | 0.97   |
| 54204  | 'Sept1'    | 2.32  | 0.66  | 1.01 | 0    | 0.41 | 1.84  | 0.11 | 0     | 0.84  | 0.45   |
| 54208  | 'Arl6ip1'  | 362.6 | 353.9 | 347  | 339  | 314  | 358.6 | 439  | 328.1 | 298.4 | 329.91 |
| 54214  | 'Golga4'   | 8.02  | 8.52  | 5.05 | 9.47 | 7.98 | 7.35  | 4.24 | 2.38  | 2.68  | 5.36   |
| 54215  | 'Cd160'    | 0     | 0.37  | 0    | 3.04 | 0    | 0     | 0.2  | 0     | 0.36  | 0      |
| 54216  | 'Pcdh7'    | 10.16 | 10.08 | 6.68 | 7.08 | 7.77 | 11.29 | 15.9 | 11.18 | 5.83  | 5.66   |
| 54217  | 'Rpl36'    | 262   | 294.9 | 447  | 437  | 270  | 396.8 | 282  | 131.8 | 291.4 | 228.98 |
| 54218  | 'B3galt4'  | 0     | 5.69  | 1.91 | 0    | 3.34 | 2.2   | 0    | 4.11  | 6.52  | 0      |
| 54219  | 'Cd320'    | 27.39 | 26.45 | 6.91 | 52.7 | 13.3 | 35.44 | 22.7 | 25.41 | 31.17 | 37.34  |
| 54324  | 'Arhgef5'  | 0     | 0     | 0    | 0    | 0.01 | 0.01  | 0    | 0     | 0     | 0      |
| 54325  | 'Elovl1'   | 12.25 | 6.19  | 4.06 | 13.7 | 6.42 | 17.74 | 9.72 | 5.5   | 9.31  | 6.79   |
| 54326  | 'Elovl2'   | 0.61  | 1.46  | 0    | 2.59 | 0.01 | 0.64  | 0    | 0     | 3.03  | 0      |
| 54338  | 'Slc23a2'  | 39.99 | 26.04 | 42.5 | 8.05 | 33.5 | 14.02 | 31.3 | 15.66 | 30.49 | 15.23  |

|        |                 |       |       |      |      |      |       |      |       |       |        |
|--------|-----------------|-------|-------|------|------|------|-------|------|-------|-------|--------|
| 54342  | 'Gnpnat1'       | 13.67 | 4.85  | 11.7 | 10   | 19   | 15.66 | 3.54 | 12.85 | 10.54 | 15.45  |
| 54343  | 'Atf7ip'        | 2.5   | 2.1   | 2.4  | 1.79 | 3.45 | 4.91  | 2.16 | 2.61  | 7.94  | 5.08   |
| 54351  | 'Elp5'          | 109.9 | 75.47 | 113  | 86.5 | 69.6 | 120.8 | 86.8 | 60.64 | 101.6 | 67.58  |
| 54352  | 'Irx5'          | 0     | 0     | 0    | 0.02 | 0    | 0     | 0    | 1.13  | 0     | 0      |
| 54353  | 'Skap2'         | 2.96  | 4.14  | 1.75 | 6.25 | 2.12 | 5.49  | 16.2 | 0.79  | 6     | 7.35   |
| 54354  | 'Rassf5'        | 2.6   | 3.43  | 12   | 0    | 4.16 | 6.55  | 11.2 | 5.6   | 1.19  | 1.99   |
| 54357  | 'Epb4114b'      | 1.06  | 4.45  | 5.31 | 4.57 | 4.35 | 5.9   | 4.22 | 2.5   | 1.77  | 7.13   |
| 54364  | 'Rpp30'         | 26.74 | 32.47 | 16.6 | 22.8 | 31.8 | 58.64 | 47.5 | 40.65 | 34.83 | 29.19  |
| 54366  | 'Ctnnal1'       | 3.57  | 3.2   | 1.72 | 2.8  | 3.9  | 0.41  | 9.02 | 2.79  | 4.37  | 0.61   |
| 54367  | 'Zfp326'        | 17.93 | 10.49 | 15.5 | 28   | 11.4 | 12.04 | 13.5 | 7.49  | 12.54 | 14.28  |
| 54368  | 'Gp9'           | 0     | 1.12  | 0.52 | 0    | 0    | 0     | 0    | 0     | 0     | 0      |
| 54369  | 'Nme6'          | 29.99 | 19.63 | 12.9 | 11.2 | 7.29 | 26.33 | 9.92 | 6.16  | 32    | 31.72  |
| 54371  | 'Chst2'         | 3.55  | 7.06  | 8.84 | 5.09 | 6.07 | 4.18  | 6.03 | 8.16  | 6.08  | 4.2    |
| 54375  | 'Azin1'         | 17.73 | 19.94 | 25.6 | 25.1 | 17.4 | 12.26 | 8.63 | 10.5  | 14.05 | 16.22  |
| 54376  | 'Cacng3'        | 19.06 | 26.94 | 45.7 | 17.8 | 7.74 | 44.06 | 15.2 | 45.2  | 18.73 | 0      |
| 54377  | 'Cacng4'        | 0.7   | 10.73 | 10.8 | 7.54 | 4.2  | 0.34  | 9.49 | 9.53  | 5.54  | 4.24   |
| 54378  | 'Cacng6'        | 0.04  | 0     | 0    | 3.87 | 1.16 | 0     | 0    | 0     | 0     | 0      |
| 54380  | 'Smarcal1'      | 7.63  | 9.89  | 20.8 | 6.07 | 7.58 | 5.5   | 11.3 | 6.9   | 9.15  | 9.83   |
| 54381  | 'Cpq'           | 16.87 | 21.35 | 14.1 | 29.1 | 15.2 | 7.38  | 37.8 | 12.67 | 0.06  | 25.17  |
| 54383  | 'Phc2'          | 8.33  | 6.89  | 4.6  | 8.58 | 2.39 | 3.36  | 17.4 | 10.87 | 18.1  | 8.7    |
| 54384  | 'Mtmr7'         | 43.27 | 25.13 | 33.6 | 8.66 | 22   | 28.73 | 35.2 | 39.39 | 29.09 | 31.59  |
| 54387  | 'Mcm3ap'        | 7.93  | 3.23  | 3.99 | 4.61 | 3.91 | 4.79  | 2.35 | 2.21  | 5.51  | 5.7    |
| 54390  | 'Sit1'          | 0     | 0     | 0    | 0    | 0    | 0     | 0    | 0     | 0     | 2.19   |
| 54391  | 'Rfk'           | 69.17 | 67.65 | 61.6 | 74.7 | 52.6 | 54.91 | 71.6 | 34.63 | 59.82 | 16.82  |
| 54392  | 'Ncapg'         | 0     | 0     | 0    | 0.75 | 0    | 0     | 0.05 | 0     | 0     | 0      |
| 54393  | 'Gabbr1'        | 44.32 | 45.4  | 49.9 | 42   | 38.9 | 26.06 | 46.6 | 40.73 | 54.12 | 57.77  |
| 54394  | 'Crlf3'         | 23.05 | 6.96  | 11   | 0.09 | 5.4  | 0.34  | 6.9  | 1.22  | 7.29  | 8.13   |
| 54396  | 'Irgm2'         | 0     | 0     | 0.04 | 0    | 0.07 | 0     | 0    | 0     | 0     | 0.01   |
| 54397  | 'Ppt2'          | 4.05  | 6.61  | 0.96 | 2.72 | 12.1 | 1.76  | 7.58 | 9.7   | 10.14 | 11.47  |
| 54399  | 'Bet1l'         | 19.34 | 24.85 | 14.6 | 13.4 | 49.8 | 64.14 | 42.3 | 35.67 | 39.17 | 32.55  |
| 54401  | 'Ywhab'         | 411   | 355.7 | 369  | 284  | 273  | 314.9 | 387  | 405   | 371.8 | 281    |
| 54402  | 'Stk19'         | 81.62 | 67.55 | 63.2 | 78.9 | 56   | 46.23 | 36.7 | 70.79 | 49.87 | 58.67  |
| 54403  | 'Slc4a4'        | 1.65  | 1.86  | 1.35 | 4.76 | 2.29 | 3.13  | 1.43 | 0     | 1.44  | 0.42   |
| 54405  | 'Ndufa1'        | 348.6 | 380.5 | 329  | 529  | 332  | 604.4 | 399  | 249.4 | 505.2 | 382.21 |
| 54409  | 'Ramp2'         | 3.93  | 3.11  | 14.4 | 25.1 | 4.96 | 0     | 9.97 | 13.27 | 6.63  | 3.29   |
| 54411  | 'Atp6ap1'       | 323.6 | 370.6 | 333  | 374  | 297  | 317.8 | 368  | 368.9 | 340.3 | 313.24 |
| 54418  | 'Fmn2'          | 2.78  | 1.1   | 2.54 | 3.03 | 0.27 | 1.59  | 1.58 | 0.46  | 0.91  | 1.54   |
| 54422  | 'Barhl1'        | 0     | 0     | 0    | 0    | 0    | 0.89  | 0    | 0     | 0     | 0      |
| 54445  | 'Unc93b1'       | 3.18  | 0     | 0    | 0.03 | 0.05 | 10.75 | 0    | 0     | 3.23  | 3.66   |
| 54446  | 'Nfat5'         | 0.92  | 1.03  | 0.89 | 0.78 | 0.71 | 2.97  | 0.01 | 0.55  | 0.27  | 1.63   |
| 54447  | 'Asah2'         | 0.01  | 0     | 3.86 | 0    | 1.55 | 0     | 0    | 0.97  | 1.59  | 0.1    |
| 54451  | 'Cpsf3'         | 42.17 | 69.16 | 57.6 | 45.2 | 61.5 | 26.96 | 77.9 | 55.39 | 49.71 | 31.74  |
| 544678 | 'Cfap74'        | 9.29  | 6.37  | 6.31 | 17.2 | 10.7 | 16.36 | 9.82 | 10.58 | 6.23  | 20.66  |
| 544696 | 'Tbc1d32'       | 1.38  | 1.64  | 0.54 | 1.47 | 0.39 | 1.76  | 2.95 | 0.85  | 3.07  | 1.1    |
| 544717 | '1190007I07Rik' | 19.8  | 20.25 | 18   | 13.8 | 17.7 | 23.57 | 20.7 | 8.54  | 13.95 | 19.3   |
| 54473  | 'Tollip'        | 50.22 | 77.14 | 71.5 | 35.4 | 79.8 | 26.12 | 50.3 | 81.68 | 86.42 | 73.03  |
| 544736 | 'Glipr1l3'      | 0     | 0     | 0    | 0    | 0    | 0     | 4.43 | 0     | 0     | 0      |
| 544763 | 'Hbq1b'         | 0     | 0     | 0    | 0    | 0.03 | 0.03  | 0    | 0     | 0     | 0      |
| 544791 | 'Myh13'         | 0     | 0.01  | 0    | 0    | 0    | 0     | 0    | 0     | 0     | 0      |
| 544817 | 'Arhgap27'      | 5.92  | 2.41  | 13.7 | 15.5 | 3.17 | 3.02  | 6.46 | 5.47  | 4.38  | 7.94   |
| 54484  | 'Mkrn1'         | 35.62 | 28.21 | 30.2 | 39.1 | 21.8 | 37.01 | 68.7 | 37.91 | 40.6  | 32.68  |
| 54485  | 'Dil4'          | 0     | 0     | 0    | 0    | 0    | 0     | 0    | 0     | 2.23  | 0      |
| 54486  | 'Hpgds'         | 4.52  | 16.73 | 0.18 | 13.6 | 2.32 | 0.63  | 0.41 | 2.93  | 1.63  | 2.32   |
| 544864 | 'Gm5785'        | 0.07  | 0.12  | 0.13 | 1.5  | 0.13 | 0.61  | 0.1  | 0.05  | 0.18  | 0.11   |
| 544922 | 'Zkscan4'       | 2.71  | 0.8   | 4.25 | 7.98 | 4.59 | 0.02  | 6.87 | 0.73  | 3.77  | 2.93   |
| 544963 | 'Iqgap2'        | 0.79  | 0.52  | 0    | 0    | 0.91 | 0     | 0.02 | 0.23  | 0.15  | 0.5    |
| 544971 | 'Bdp1'          | 2.02  | 0.86  | 1.83 | 7.64 | 2.42 | 1.51  | 3.73 | 1.47  | 4.33  | 1.33   |
| 544990 | 'Gm5795'        | 0.28  | 0     | 1.85 | 0    | 0    | 0     | 2.84 | 1.67  | 0.75  | 0      |

|        |                 |       |       |      |      |      |       |      |       |       |        |
|--------|-----------------|-------|-------|------|------|------|-------|------|-------|-------|--------|
| 545007 | 'Gm5796'        | 1.7   | 2.7   | 2.63 | 1.52 | 4.06 | 0.19  | 1.61 | 3.09  | 2.06  | 1.45   |
| 545055 | 'Cma2'          | 4.03  | 0     | 0    | 0    | 0    | 0     | 0    | 0     | 0     | 0      |
| 545085 | 'Wdr70'         | 7.02  | 9.34  | 6.68 | 0.74 | 7.53 | 5.55  | 6.77 | 6.83  | 14.5  | 11.42  |
| 545124 | 'Tdg-ps'        | 0     | 0     | 0    | 0    | 0    | 0     | 0    | 0     | 0     | 0.01   |
| 545136 | 'Fam186b'       | 0.87  | 1.87  | 0    | 0.4  | 0    | 0     | 2.03 | 0.3   | 0.17  | 0      |
| 545140 | 'Olfr288'       | 0.13  | 0     | 0.1  | 0    | 0    | 0.04  | 0    | 2.36  | 0     | 0      |
| 545156 | 'Kalrn'         | 3.7   | 2.89  | 5.37 | 3.51 | 6.58 | 2.87  | 3.98 | 5.29  | 4.22  | 1.53   |
| 54519  | 'Apbb1ip'       | 2.34  | 1.3   | 0.02 | 0    | 1.41 | 11.48 | 3.74 | 0     | 0     | 3.25   |
| 545192 | 'Baip3'         | 172   | 148.5 | 163  | 98   | 107  | 86.53 | 116  | 99.49 | 123.6 | 142.95 |
| 54524  | 'Syf6'          | 36.05 | 3.89  | 0.24 | 29   | 0.54 | 0     | 0.09 | 4.57  | 0     | 0.03   |
| 54525  | 'Syf7'          | 2.55  | 1.1   | 3.56 | 3.12 | 1.92 | 0.83  | 0.59 | 1.46  | 2.59  | 1.48   |
| 545253 | 'Gm5820'        | 0.76  | 1.14  | 2.96 | 2.24 | 4.23 | 1.29  | 0    | 1.61  | 6.23  | 6.19   |
| 54526  | 'Syf10'         | 13.85 | 8.47  | 12   | 29.2 | 10.9 | 2.28  | 1.2  | 7.83  | 14.64 | 27.65  |
| 545276 | 'Gal3st3'       | 17.54 | 13.1  | 15   | 10   | 12.1 | 17.95 | 29.7 | 13.36 | 18.56 | 5.05   |
| 545291 | 'Hpse2'         | 0.07  | 0     | 0    | 0    | 0    | 0     | 0.02 | 3.24  | 0     | 0      |
| 545370 | 'Hmcn1'         | 0     | 0     | 0    | 0    | 0    | 0     | 0.19 | 0     | 0     | 0      |
| 545389 | 'Cep170'        | 8.21  | 10.26 | 7.92 | 13.5 | 6.27 | 4.06  | 5.48 | 6.02  | 13.69 | 11.09  |
| 545391 | 'Catspere2'     | 1.37  | 0.47  | 2.21 | 1.13 | 0.72 | 1.86  | 1.24 | 1.09  | 3.04  | 0.13   |
| 545428 | 'Ccdc141'       | 1.64  | 4.04  | 0.03 | 0    | 0.3  | 0.02  | 2.8  | 0     | 0     | 0.02   |
| 545471 | 'Zfp345'        | 0     | 0     | 0    | 0.02 | 0    | 0.01  | 0    | 0     | 0     | 0      |
| 545474 | 'Scrt2'         | 0     | 0     | 0    | 0.02 | 1.03 | 0     | 0    | 0     | 0     | 0.15   |
| 545481 | 'Arhgap40'      | 0     | 1.19  | 0.12 | 0    | 0    | 0     | 0    | 0.1   | 0     | 1.09   |
| 545490 | 'Zfp973'        | 1     | 1.68  | 2.94 | 0.98 | 2.89 | 0.71  | 3.1  | 2.24  | 1.31  | 0.68   |
| 545527 | 'Erich6'        | 0.33  | 0.04  | 0    | 0    | 0    | 0     | 0    | 0     | 0     | 0      |
| 545554 | 'Ankrd34a'      | 19.56 | 32.07 | 12.3 | 3.44 | 25.9 | 10.23 | 17.2 | 9.55  | 41.85 | 7.23   |
| 545562 | 'Amy2b'         | 0     | 0     | 0.04 | 0    | 0    | 0     | 0    | 0     | 0     | 0      |
| 54561  | 'Nap1l3'        | 55.02 | 68.27 | 60.9 | 37.4 | 51.4 | 58.72 | 72.2 | 48.23 | 40.87 | 41.52  |
| 545611 | 'Fam205a2'      | 2.06  | 1.76  | 1.28 | 0.89 | 2.74 | 1.13  | 0.24 | 1.03  | 1.86  | 0.03   |
| 54562  | 'Lrrc6'         | 12.05 | 4.29  | 3.05 | 15.6 | 1.73 | 0.02  | 1.47 | 7.62  | 6.91  | 3.54   |
| 545622 | 'Ptpn3'         | 0     | 0.25  | 0.24 | 0    | 0    | 0     | 0.12 | 0.42  | 0.38  | 0      |
| 54563  | 'Nup210'        | 1.16  | 0.59  | 1.11 | 1.6  | 5.63 | 0.62  | 2.17 | 1.77  | 1.24  | 1.45   |
| 545645 | 'Gm13283'       | 0     | 0     | 0    | 0    | 0    | 0     | 0    | 0     | 3.62  | 0      |
| 545649 | 'Gm13276'       | 0     | 0     | 0    | 0    | 0    | 0     | 0    | 0     | 0.51  | 0      |
| 545651 | 'Gm13278'       | 0     | 0     | 0    | 0    | 0    | 0     | 0    | 0     | 0.21  | 0      |
| 545652 | 'Gm13275'       | 0     | 0     | 0.19 | 0.07 | 0    | 0     | 0    | 0     | 0.17  | 0      |
| 545662 | 'B020004J07Rik' | 0     | 0.07  | 0    | 0    | 0    | 0     | 0    | 0     | 0.02  | 0      |
| 545667 | 'Shisal2a'      | 5.44  | 7.19  | 13.4 | 0    | 0    | 23.07 | 0    | 5.37  | 3.01  | 6.61   |
| 545725 | 'Mterf1a'       | 5.5   | 1.53  | 0.04 | 0    | 3.84 | 0.09  | 0    | 2.83  | 1.81  | 4.26   |
| 545814 | 'Smok3a'        | 0     | 0     | 0.04 | 0.87 | 0.18 | 0     | 0    | 0     | 0     | 0      |
| 545817 | 'Cyp2w1'        | 0     | 0     | 0    | 0    | 0    | 0     | 0    | 0.01  | 0     | 0      |
| 545824 | 'Zar1l'         | 0     | 0     | 0    | 1.92 | 0    | 0     | 0    | 0.14  | 0     | 0      |
| 545893 | 'Mansc4'        | 0     | 3.69  | 0    | 0    | 0    | 7.01  | 0    | 0     | 0     | 0      |
| 545902 | 'Ptprh'         | 0     | 0.07  | 1.01 | 0.39 | 0    | 0     | 0    | 0     | 0     | 0      |
| 545929 | 'Gm5891'        | 0     | 0     | 0    | 0    | 0    | 0     | 0    | 0     | 0     | 0      |
| 545938 | 'Zfp607a'       | 0.1   | 0.03  | 0.02 | 0.02 | 0    | 0     | 0.03 | 0.02  | 0     | 0      |
| 545975 | 'Cers3'         | 0     | 0     | 0    | 0    | 0    | 0.35  | 0    | 0.01  | 0.08  | 0      |
| 54598  | 'Calcr1'        | 0     | 0.18  | 1.08 | 0    | 0    | 0     | 1.48 | 0.16  | 0     | 0      |
| 54601  | 'Foxo4'         | 0     | 0.18  | 0    | 0    | 0    | 0     | 0    | 0     | 0     | 0.43   |
| 546024 | 'Crxos'         | 2.33  | 0     | 0.02 | 0    | 0    | 0     | 0.06 | 0.04  | 0.05  | 0.08   |
| 54604  | 'Pcnx'          | 0.51  | 3.41  | 1.94 | 7.22 | 1.52 | 0.03  | 6.49 | 0.93  | 2.07  | 1.84   |
| 546049 | 'C330021F23Rik' | 0.14  | 0.04  | 0    | 0.09 | 0.02 | 0     | 0.04 | 0.03  | 0.12  | 0      |
| 546061 | 'LOC546061'     | 0     | 0     | 0    | 0    | 0.02 | 0     | 0    | 0     | 0.02  | 0      |
| 54607  | 'Socs6'         | 2.33  | 1.19  | 3.25 | 1.6  | 2.92 | 0.02  | 0.02 | 2.73  | 2.19  | 3.96   |
| 546071 | 'Mast3'         | 12.59 | 7.33  | 19.7 | 17   | 10.9 | 17.72 | 8.68 | 9.83  | 11.35 | 7.85   |
| 54608  | 'Abhd2'         | 1.61  | 0.02  | 11   | 0    | 0    | 1.65  | 4.21 | 0     | 0     | 5.39   |
| 54609  | 'Ubqln2'        | 4.49  | 5.77  | 8.46 | 13.8 | 5.93 | 9.11  | 11.4 | 4.48  | 15.72 | 4.42   |
| 54610  | 'Tbc1d8'        | 8.06  | 4.95  | 5.07 | 3.66 | 6.53 | 2.45  | 12.7 | 4.53  | 13.03 | 8.76   |
| 54611  | 'Pde3a'         | 0.01  | 0.24  | 0.23 | 0.02 | 0.35 | 0     | 0    | 0     | 0     | 0.3    |

|        |                 |       |       |      |      |      |       |      |       |       |        |
|--------|-----------------|-------|-------|------|------|------|-------|------|-------|-------|--------|
| 546118 | 'Ubtfl1'        | 0     | 0     | 0    | 0    | 0    | 0     | 0.02 | 0     | 0     | 0      |
| 54612  | 'Sfrp5'         | 6.82  | 0     | 7.92 | 2.56 | 0    | 0     | 8.72 | 2.1   | 3.42  | 0.02   |
| 54613  | 'St3gal6'       | 3.26  | 0     | 0    | 0.38 | 6.12 | 0.37  | 0.77 | 3.05  | 3.07  | 0.51   |
| 546134 | 'Gramd2'        | 2.69  | 1.94  | 0.95 | 1.26 | 5.94 | 0     | 0    | 3.83  | 3.34  | 0.05   |
| 54614  | 'Prpf40b'       | 20.76 | 17.85 | 25.1 | 38.7 | 30.8 | 21.84 | 21.5 | 19.49 | 22.09 | 24.61  |
| 546143 | 'Ccp1os'        | 13.88 | 16.96 | 9.73 | 0    | 5.32 | 15.95 | 36.3 | 30.33 | 42.19 | 22.45  |
| 54615  | 'Npff'          | 0     | 0     | 0    | 0    | 3.23 | 0     | 3.04 | 0     | 0.11  | 1.64   |
| 54616  | 'Extl3'         | 3.27  | 6.21  | 10.9 | 4.49 | 5.83 | 7.48  | 6.89 | 1.1   | 7.35  | 6.57   |
| 54624  | 'Paf1'          | 51.99 | 64.97 | 44.9 | 32.4 | 57   | 104.6 | 132  | 69.39 | 97.58 | 77.19  |
| 54630  | 'Prickle3'      | 0     | 0.12  | 0    | 0    | 0    | 0     | 0    | 0     | 0.09  | 0      |
| 54631  | 'Npfs1'         | 0.2   | 0.18  | 0.22 | 0.36 | 0.32 | 0.13  | 0.25 | 0.16  | 0.2   | 0.15   |
| 54632  | 'Ftsj1'         | 9.29  | 11.24 | 11   | 4.93 | 9.34 | 16.66 | 14.9 | 6.16  | 12.67 | 18.82  |
| 546325 | 'Gm5936'        | 0     | 3.33  | 0    | 0.13 | 4.32 | 0     | 0.05 | 0     | 0.03  | 3.31   |
| 54633  | 'Pqbp1'         | 144.9 | 167.9 | 152  | 247  | 132  | 212.1 | 152  | 166.4 | 155.7 | 171.1  |
| 546336 | 'Prrg1'         | 0     | 0.45  | 0.45 | 0    | 0.46 | 0.01  | 0.43 | 0.01  | 1.08  | 0      |
| 54635  | 'Pdgc'          | 0.49  | 0.18  | 1.82 | 0.03 | 0.35 | 0     | 0    | 1.24  | 0     | 0      |
| 54636  | 'Wdr45'         | 44.49 | 51.58 | 31.3 | 31   | 51.3 | 66.13 | 65.4 | 52.33 | 61.38 | 38.86  |
| 54637  | 'Prpf2'         | 118.6 | 132.3 | 152  | 135  | 146  | 162.3 | 224  | 207.2 | 93.65 | 118.43 |
| 54638  | 'Ccdc22'        | 23.2  | 20.23 | 14.6 | 2.27 | 26.2 | 10.13 | 18.1 | 20.81 | 16.61 | 48.04  |
| 54644  | 'Otud5'         | 4.79  | 3.1   | 6.4  | 17.6 | 5.33 | 5.66  | 1.62 | 3.8   | 4.88  | 0.13   |
| 54645  | 'Gripap1'       | 46.55 | 45.47 | 50.6 | 22.7 | 57.3 | 38.41 | 29.8 | 37.81 | 27.29 | 41.11  |
| 54646  | 'Ppp1r3f'       | 3.51  | 1.43  | 5.66 | 2.83 | 3.69 | 0.12  | 0    | 3.98  | 3.26  | 1.08   |
| 54648  | 'Ccdc120'       | 0.66  | 1.89  | 3.06 | 2.53 | 0    | 1.43  | 0    | 1.68  | 2.6   | 1.99   |
| 54650  | 'Sfmbt1'        | 2.44  | 4.61  | 0.48 | 5.61 | 4.17 | 2.46  | 4.95 | 1.45  | 3.62  | 3.23   |
| 54651  | 'Usp27x'        | 3.63  | 3.93  | 1.7  | 5.46 | 3.64 | 0.46  | 0    | 0     | 0.47  | 4.6    |
| 546519 | 'Tmem235'       | 0     | 0     | 0    | 0    | 0    | 0     | 0    | 0     | 4.9   | 2.49   |
| 54652  | 'Cacna1f'       | 0     | 0     | 0.01 | 0    | 0    | 0     | 1.35 | 0     | 0     | 0      |
| 546611 | 'Klhl33'        | 0.53  | 0.71  | 3.52 | 0.14 | 0.44 | 0.64  | 5.31 | 0.07  | 5.48  | 3.54   |
| 546648 | 'Klhd7b'        | 0     | 0     | 0.11 | 0    | 0    | 0     | 0    | 0     | 0     | 0      |
| 54667  | 'Atp8b2'        | 4.15  | 5.38  | 9.57 | 13.7 | 6.83 | 2.35  | 7.39 | 6.95  | 4.2   | 6.45   |
| 54670  | 'Atp8b1'        | 0     | 0.03  | 0    | 0    | 0    | 0     | 0    | 0     | 0     | 0      |
| 54672  | 'Adgrg3'        | 0     | 0.75  | 0    | 0    | 0    | 0     | 0    | 0     | 0     | 0      |
| 54673  | 'Sh3glb1'       | 4.39  | 5.45  | 4.74 | 39.8 | 6.2  | 6.2   | 7.51 | 12.19 | 4.72  | 4.2    |
| 54678  | 'Zfp108'        | 3.47  | 2.31  | 8.14 | 0    | 5.25 | 9.88  | 19.6 | 2.32  | 0.35  | 3.06   |
| 54683  | 'Prdx5'         | 514.2 | 273.1 | 499  | 470  | 501  | 546.4 | 615  | 486.8 | 424.3 | 377.8  |
| 546840 | 'Ldlrad1'       | 0     | 0.4   | 1.15 | 0    | 0    | 0     | 0.01 | 0     | 0     | 0.51   |
| 546886 | 'Cfap73'        | 0     | 0.92  | 0    | 0    | 0.67 | 2.13  | 0    | 0     | 0     | 8.52   |
| 546983 | 'Vmn2r77'       | 0     | 0     | 0    | 0    | 0    | 0     | 0    | 0.08  | 0     | 0      |
| 54709  | 'Eif3i'         | 146.5 | 87.79 | 156  | 101  | 138  | 244.1 | 175  | 167.5 | 138.7 | 155.87 |
| 547109 | 'Trim43a'       | 1.16  | 0     | 0    | 0    | 1.03 | 0     | 0.03 | 2.65  | 0     | 0      |
| 54711  | 'Plagl2'        | 0.46  | 0.65  | 0    | 0    | 0.98 | 0.01  | 0    | 0     | 0.66  | 0.8    |
| 54712  | 'Plxnc1'        | 6.48  | 7.44  | 3.87 | 5.67 | 4.86 | 2.88  | 3.31 | 2.99  | 3.01  | 4.02   |
| 54713  | 'Fezf2'         | 1.3   | 0     | 0    | 0    | 2.07 | 0     | 0    | 0     | 0     | 0      |
| 547176 | 'Zc3h12b'       | 1.15  | 3.25  | 2.65 | 1.16 | 4.95 | 1.5   | 0.41 | 2.15  | 1.03  | 1.88   |
| 54720  | 'Rcan1'         | 7.94  | 4.42  | 12.8 | 16.7 | 3.47 | 12.37 | 10.2 | 16.23 | 4.39  | 13.1   |
| 54721  | 'Tyk2'          | 0     | 4.6   | 4.1  | 3.64 | 0.8  | 1.7   | 0    | 1.42  | 1.76  | 3.25   |
| 54722  | 'Gsdme'         | 14.1  | 19.38 | 12   | 0.03 | 14.3 | 24.47 | 19   | 33.91 | 22.37 | 24.13  |
| 54723  | 'Tfip11'        | 9.4   | 11.54 | 14.8 | 12.5 | 11.7 | 5.79  | 16.3 | 6.29  | 16.5  | 8.33   |
| 54725  | 'Cadm1'         | 169.6 | 213.5 | 114  | 213  | 150  | 113.2 | 229  | 193   | 123.8 | 122.49 |
| 547253 | 'Parp14'        | 0     | 0     | 0.03 | 1.12 | 0.01 | 0     | 0    | 0.03  | 0     | 0      |
| 550619 | 'Arid3c'        | 0     | 0     | 0    | 0    | 0.14 | 6.77  | 0    | 0     | 0     | 0      |
| 553127 | 'Rtl8b'         | 124.8 | 103.9 | 121  | 115  | 110  | 93.02 | 111  | 123.5 | 184.9 | 143.17 |
| 554327 | '2610042L04Rik' | 14.52 | 9.52  | 10.6 | 3.2  | 12.1 | 3.36  | 7.34 | 20.63 | 19.7  | 4.03   |
| 55927  | 'Hes6'          | 39.1  | 62.29 | 58.8 | 88.1 | 19.4 | 71.52 | 30.8 | 28.89 | 102.4 | 87.3   |
| 55932  | 'Gbp3'          | 10.37 | 0     | 2.96 | 16.5 | 0    | 3.48  | 0    | 0.54  | 0     | 4.36   |
| 55934  | 'Rp9'           | 16.77 | 31.53 | 61.4 | 45.4 | 23.9 | 39.21 | 21.7 | 17.16 | 60.9  | 15.22  |
| 55935  | 'Fnbp4'         | 11.12 | 12.16 | 13.9 | 17.1 | 9.31 | 10.85 | 19.8 | 13.07 | 19.81 | 14.69  |
| 55936  | 'Ctps2'         | 17.64 | 23.99 | 22.2 | 13.2 | 27.2 | 27.39 | 10.7 | 20.82 | 22.42 | 35.37  |

|       |            |       |       |      |      |      |       |      |       |       |        |
|-------|------------|-------|-------|------|------|------|-------|------|-------|-------|--------|
| 55942 | 'Sertad1'  | 4.04  | 6.88  | 4.11 | 10.8 | 5.22 | 25.03 | 0    | 0     | 0     | 5.76   |
| 55943 | 'Stx8'     | 5.64  | 9.63  | 8.93 | 21.5 | 16.5 | 9.84  | 10.7 | 7.98  | 9.51  | 7.95   |
| 55944 | 'Eif3d'    | 65.92 | 70.13 | 75.4 | 53.4 | 35   | 62.73 | 51.3 | 56.56 | 60.31 | 30.41  |
| 55946 | 'Ap3m1'    | 17.74 | 7.65  | 17.3 | 8.22 | 11.4 | 11.22 | 12   | 7.6   | 24.7  | 23.17  |
| 55947 | 'Dclre1a'  | 1.55  | 1.07  | 0.9  | 1.21 | 0.81 | 0.22  | 0    | 0     | 0.81  | 2.66   |
| 55948 | 'Sfn'      | 0     | 2.47  | 0.09 | 0    | 0    | 0     | 0    | 0     | 0.03  | 0.85   |
| 55949 | 'Eef1b2'   | 90.14 | 107.1 | 92.1 | 110  | 130  | 125.1 | 111  | 95.68 | 96.56 | 105.5  |
| 55950 | 'Bri3'     | 8.73  | 9.06  | 4.1  | 26.2 | 8.58 | 0.06  | 0.05 | 6.12  | 10.65 | 0.69   |
| 55951 | 'Mpc1'     | 225.5 | 135.3 | 251  | 292  | 304  | 321.4 | 250  | 233.3 | 223.1 | 181.08 |
| 55960 | 'Ebag9'    | 18.91 | 10.44 | 5.19 | 14.1 | 27.2 | 3.43  | 3.95 | 15.42 | 9.78  | 13.76  |
| 55961 | 'Slc13a1'  | 0     | 0.29  | 0    | 0    | 0    | 0     | 0    | 0     | 0     | 0      |
| 55963 | 'Slc1a4'   | 29.14 | 27.98 | 32.6 | 11.4 | 6.26 | 8.13  | 25.8 | 31.83 | 28.13 | 19.46  |
| 55978 | 'Ift20'    | 59.04 | 39.42 | 60.1 | 90.1 | 93.6 | 80.26 | 97.2 | 63.96 | 52.39 | 36.72  |
| 55979 | 'Agpat1'   | 61.41 | 86.3  | 77.5 | 8.82 | 63.5 | 80.32 | 65.3 | 82.47 | 116.4 | 79.58  |
| 55980 | 'Impa1'    | 38.24 | 38.1  | 54.7 | 44.5 | 44.4 | 80.3  | 43.9 | 47.54 | 27.87 | 49.27  |
| 55981 | 'Pigb'     | 2.13  | 3.88  | 8.4  | 0.43 | 3.85 | 6.97  | 2.48 | 3.9   | 7.93  | 6.84   |
| 55982 | 'Paxip1'   | 10.05 | 7.88  | 5.52 | 3.46 | 1.78 | 5.56  | 5.46 | 9.17  | 4.5   | 6.46   |
| 55983 | 'Pdzn3'    | 2.96  | 0     | 0    | 0    | 0    | 0     | 0.76 | 0     | 3     | 0      |
| 55984 | 'Camkk1'   | 24.03 | 37.5  | 57.3 | 22.9 | 23.5 | 18.26 | 41.1 | 48.11 | 50.7  | 17.49  |
| 55987 | 'Cpxm2'    | 0     | 0     | 0.02 | 0    | 0.85 | 0.02  | 0.02 | 1.35  | 0     | 3.3    |
| 55988 | 'Snx12'    | 24.43 | 15.69 | 21   | 31.1 | 17.3 | 25.15 | 19.9 | 15.6  | 34.54 | 29.01  |
| 55989 | 'Nop58'    | 28.33 | 33.03 | 31.3 | 25.1 | 38.2 | 37.02 | 34.8 | 42.53 | 44.34 | 38.05  |
| 55991 | 'Panx1'    | 6.16  | 8.31  | 5.01 | 7.8  | 12.8 | 9     | 5.96 | 16.95 | 11.2  | 2.01   |
| 55992 | 'Trim3'    | 15.11 | 29.16 | 30.4 | 18.5 | 25.8 | 50.21 | 39.1 | 19.8  | 47.49 | 19.69  |
| 55993 | 'Msh4'     | 0     | 0     | 0    | 0    | 0.06 | 0.03  | 0    | 0     | 0     | 0      |
| 55994 | 'Smad9'    | 0.2   | 0.3   | 0.66 | 0.01 | 0.12 | 0.06  | 2.1  | 0.83  | 2.83  | 1.59   |
| 56009 | 'Alyref2'  | 4.36  | 14.91 | 7.79 | 0.18 | 3.67 | 8.52  | 9.35 | 8.66  | 17    | 9.86   |
| 56012 | 'Pgam2'    | 0.61  | 0.33  | 5.76 | 0.4  | 0.51 | 14.24 | 19.8 | 4.77  | 0.5   | 4.44   |
| 56013 | 'Srcin1'   | 1.89  | 1.39  | 1.02 | 1.32 | 4.36 | 2.05  | 2.44 | 1.49  | 2.02  | 2.03   |
| 56015 | 'Olf1r71'  | 0     | 1.81  | 0    | 0    | 0    | 0     | 0    | 0     | 0     | 0      |
| 56016 | 'Hebp2'    | 18.07 | 15.54 | 6.01 | 52.1 | 14   | 13.45 | 5.36 | 14.13 | 16.38 | 11.62  |
| 56017 | 'Slc2a8'   | 16.27 | 23.61 | 18.1 | 0    | 12.2 | 17.24 | 15.8 | 16.39 | 11.88 | 22.81  |
| 56018 | 'Stard10'  | 7.63  | 14.87 | 5.76 | 15.2 | 18   | 11.09 | 2.95 | 8.44  | 33.77 | 20.57  |
| 56030 | 'Tmem131'  | 1.53  | 1.49  | 1.81 | 6.44 | 2.41 | 0.26  | 1    | 2.35  | 1.46  | 1.65   |
| 56031 | 'Ppie'     | 16.4  | 38.11 | 39.3 | 115  | 43.3 | 44.68 | 34.8 | 42.36 | 21.62 | 23.19  |
| 56032 | 'Nprl2'    | 82.31 | 67.73 | 70.3 | 57.3 | 99.2 | 119.3 | 61.9 | 95.66 | 41.93 | 109.65 |
| 56036 | 'Ccnl2'    | 21.98 | 34.48 | 30.8 | 61.8 | 27.1 | 18.17 | 15   | 31.2  | 40.37 | 22.88  |
| 56040 | 'Rplp1'    | 556.9 | 491.6 | 704  | 595  | 459  | 802.5 | 618  | 354.3 | 565.2 | 545.17 |
| 56041 | 'Uso1'     | 0.63  | 2.19  | 3.83 | 5.83 | 4.27 | 4.58  | 5.06 | 5.56  | 9.93  | 0.57   |
| 56043 | 'Akr1e1'   | 24.86 | 28.33 | 31.6 | 36.5 | 15.8 | 56.23 | 13.3 | 24.96 | 12.57 | 34.2   |
| 56044 | 'Rala'     | 34.34 | 27.4  | 36.7 | 46.4 | 23.7 | 18.19 | 15.2 | 25.46 | 42.42 | 5.77   |
| 56045 | 'Samhd1'   | 2.65  | 5.18  | 5.78 | 2.8  | 3.4  | 2.65  | 4.38 | 1.09  | 0     | 2.4    |
| 56046 | 'Uqcc1'    | 78.61 | 71.04 | 73.1 | 51.1 | 66.2 | 88.4  | 70.2 | 75.42 | 78.4  | 77.88  |
| 56047 | 'Msln'     | 2.4   | 6.82  | 0    | 9.62 | 4.24 | 0     | 0    | 0.42  | 0     | 0      |
| 56048 | 'Lgals8'   | 25.95 | 31.07 | 53.5 | 32   | 38.2 | 34.94 | 36.8 | 30.89 | 28.13 | 59.57  |
| 56050 | 'Cyp39a1'  | 0     | 0     | 0    | 0.64 | 0    | 0     | 0    | 1.03  | 0     | 0      |
| 56055 | 'Gtpbp2'   | 9.66  | 2.36  | 2.59 | 16.5 | 5.16 | 1.25  | 4.07 | 1.1   | 7.51  | 2.03   |
| 56057 | 'Btg4'     | 0     | 0     | 0    | 0    | 0    | 1.83  | 0    | 0     | 0     | 0      |
| 56068 | 'Ammechr1' | 0.06  | 0.55  | 1.7  | 0.4  | 0    | 0.03  | 0.59 | 0     | 0     | 0      |
| 56069 | 'Ii17b'    | 0.21  | 0     | 0    | 0    | 0.68 | 0.07  | 0.08 | 0.37  | 0.8   | 0.2    |
| 56070 | 'Tcerg1'   | 27.9  | 16.52 | 31.8 | 38.2 | 19.1 | 15.98 | 27.4 | 18.2  | 24.5  | 16.55  |
| 56072 | 'Lgals12'  | 0     | 0     | 0    | 0    | 0    | 0     | 1.69 | 0     | 0     | 0      |
| 56075 | 'Pdss1'    | 5.45  | 6.96  | 9.77 | 8.08 | 6.38 | 13.53 | 9.04 | 6.9   | 11.59 | 8.15   |
| 56077 | 'Dgke'     | 4.57  | 6.45  | 17.5 | 21.8 | 14   | 1.67  | 8.25 | 8.11  | 6.69  | 6.23   |
| 56078 | 'Car5b'    | 0.13  | 1.75  | 0.2  | 0.5  | 0.38 | 0.84  | 0.31 | 0.15  | 0.22  | 0.09   |
| 56079 | 'Asth2'    | 0.01  | 0.66  | 0.01 | 0.2  | 1.48 | 0     | 0.44 | 1.51  | 0.52  | 0.02   |
| 56085 | 'Ubqln1'   | 21.16 | 15.23 | 15.5 | 37.2 | 30.1 | 13.91 | 14.2 | 6.05  | 33.2  | 10.07  |
| 56086 | 'Set'      | 92.31 | 107.9 | 111  | 201  | 121  | 52.87 | 108  | 86    | 108.3 | 98.24  |

|       |           |       |       |      |      |      |       |      |       |       |        |
|-------|-----------|-------|-------|------|------|------|-------|------|-------|-------|--------|
| 56087 | 'Dnah10'  | 0.5   | 0     | 0.03 | 0.26 | 0.02 | 0.12  | 0.12 | 0.02  | 0.42  | 0.33   |
| 56088 | 'Psmg1'   | 69.9  | 62.18 | 55.2 | 61.7 | 61.8 | 84.93 | 63.1 | 73.1  | 57.49 | 79.09  |
| 56089 | 'Ramp3'   | 6.92  | 82.08 | 0.12 | 4.5  | 4.62 | 0.08  | 0.04 | 6.66  | 0     | 1.75   |
| 56094 | 'Cts8'    | 0     | 0     | 0    | 0.06 | 0    | 0.02  | 0    | 0     | 0.02  | 0.04   |
| 56095 | 'Ftsj3'   | 10.07 | 7.78  | 15.4 | 33.7 | 12.7 | 14.89 | 5.56 | 13.61 | 15.36 | 12.1   |
| 56149 | 'Grasp'   | 0     | 0.24  | 1.03 | 0    | 0    | 0     | 2.51 | 0.02  | 3.22  | 0.59   |
| 56150 | 'Mad2l1'  | 15.02 | 6.66  | 5.01 | 15.8 | 1.13 | 4.16  | 0    | 7.05  | 0.43  | 0      |
| 56173 | 'Cldn14'  | 0     | 4.19  | 0    | 0    | 0    | 0     | 0    | 2.73  | 0     | 0      |
| 56174 | 'Nagk'    | 134.2 | 116.1 | 110  | 131  | 144  | 104   | 83.6 | 126.1 | 133.2 | 97.24  |
| 56175 | 'Bace2'   | 1.37  | 0     | 0    | 0    | 0    | 0     | 0    | 0.92  | 0     | 0      |
| 56176 | 'Pigp'    | 81.81 | 136.6 | 46   | 87.6 | 99.8 | 112   | 70.2 | 109.6 | 80.46 | 126.6  |
| 56177 | 'Olfm1'   | 94.47 | 104.6 | 95.5 | 213  | 116  | 83    | 113  | 48.64 | 82.55 | 70.92  |
| 56183 | 'Nmu'     | 0     | 0     | 0    | 0    | 0    | 0     | 0    | 17.87 | 0     | 0      |
| 56187 | 'Rabggta' | 37.2  | 14.31 | 44.7 | 13.3 | 25.2 | 41.05 | 56.3 | 35.77 | 53.54 | 37.26  |
| 56188 | 'Fxyd1'   | 40.54 | 15.59 | 21.6 | 8.13 | 64   | 38.13 | 15   | 10.26 | 22.5  | 22.88  |
| 56189 | 'Prodh2'  | 0.61  | 0     | 0    | 0    | 0    | 0     | 0    | 0     | 0     | 0      |
| 56190 | 'Rbm38'   | 3.54  | 6.61  | 2.41 | 5.68 | 0.03 | 9.7   | 2.36 | 5.63  | 0.44  | 0      |
| 56191 | 'Tro'     | 50.73 | 31.36 | 50.8 | 65.1 | 36.9 | 44.36 | 60   | 47.58 | 64.03 | 59.25  |
| 56193 | 'Plek'    | 0     | 2.8   | 3.92 | 0.57 | 0.18 | 6.98  | 1.46 | 0.91  | 1.47  | 1.25   |
| 56194 | 'Prpf40a' | 13.42 | 19.91 | 16.8 | 15.1 | 25.3 | 32.12 | 11.7 | 26.62 | 23.29 | 22.54  |
| 56195 | 'Ptbp2'   | 41.07 | 38.4  | 37.7 | 23.1 | 21.7 | 16.07 | 36   | 24.61 | 27.19 | 46.78  |
| 56196 | 'Tdp2'    | 5.85  | 7.5   | 7.29 | 3.99 | 12.8 | 0     | 8.19 | 12.47 | 12.22 | 8.62   |
| 56198 | 'Heyl'    | 0.84  | 1.16  | 2.67 | 0.73 | 0    | 0.14  | 1.88 | 0     | 1.33  | 0      |
| 56199 | 'Abcb10'  | 1.54  | 7.13  | 11.3 | 16.4 | 7.35 | 4.17  | 4.05 | 4.78  | 1.91  | 1.08   |
| 56200 | 'Ddx21'   | 2.39  | 2.48  | 2.25 | 3.64 | 0.32 | 1.46  | 6.45 | 2.19  | 0.05  | 0.86   |
| 56205 | 'Ensa'    | 193.6 | 282.6 | 231  | 259  | 316  | 176.7 | 237  | 226.6 | 138.2 | 229.59 |
| 56207 | 'Uchl5'   | 59.58 | 41.28 | 54   | 25.6 | 78.7 | 24.59 | 59.7 | 60.84 | 86.89 | 76.29  |
| 56208 | 'Becn1'   | 114.2 | 91.93 | 70.6 | 126  | 72   | 121.1 | 129  | 156.4 | 96.45 | 118.45 |
| 56209 | 'Gde1'    | 222.1 | 229.3 | 226  | 166  | 225  | 271.6 | 247  | 251.7 | 180.6 | 242.79 |
| 56210 | 'Rev1'    | 3.38  | 4.73  | 5.16 | 15.5 | 2.45 | 0.07  | 1.4  | 4.57  | 5.08  | 1.5    |
| 56212 | 'Rhog'    | 3.14  | 19.37 | 26.9 | 0    | 17.9 | 1.22  | 0.04 | 1.36  | 3.61  | 3.42   |
| 56213 | 'Htra1'   | 34.9  | 30.66 | 28.3 | 9.62 | 8.75 | 24.02 | 19.5 | 9.56  | 24.14 | 2.36   |
| 56214 | 'Scamp4'  | 110.5 | 107.7 | 72   | 120  | 95.8 | 81.54 | 86.9 | 90.33 | 89.02 | 84.47  |
| 56215 | 'Acin1'   | 17.58 | 16.14 | 8.25 | 10.5 | 16.3 | 15.48 | 12.9 | 13.96 | 18.39 | 13.07  |
| 56216 | 'Stx1b'   | 28.58 | 21.41 | 52.4 | 9.12 | 36.6 | 22.3  | 44.8 | 37.18 | 29.13 | 23.73  |
| 56217 | 'Mpp5'    | 14.78 | 14.47 | 11.4 | 16.8 | 10.5 | 14.17 | 12.7 | 7.21  | 12.26 | 15.62  |
| 56218 | 'Patz1'   | 4.39  | 8.72  | 8.01 | 15.3 | 3.96 | 3.41  | 12.1 | 5.27  | 7.81  | 1.31   |
| 56219 | 'Extl1'   | 9.64  | 2.7   | 10.9 | 3.08 | 7.03 | 0.02  | 8.05 | 6.69  | 5.96  | 2.2    |
| 56220 | 'Zfp386'  | 7.13  | 10.3  | 5.91 | 6.41 | 2.92 | 10.14 | 7.53 | 5.91  | 18    | 10.33  |
| 56222 | 'Cited4'  | 3.26  | 0.7   | 1.48 | 7.23 | 1    | 6.1   | 0    | 0.85  | 8.38  | 0      |
| 56223 | 'Fscn3'   | 0     | 0     | 1.22 | 0    | 0    | 0     | 0    | 0     | 0     | 0.29   |
| 56224 | 'Tspan5'  | 3.18  | 1.64  | 2.8  | 7.97 | 3.61 | 2.67  | 7.85 | 2.62  | 5.67  | 2.97   |
| 56226 | 'Espn'    | 0     | 0     | 1.76 | 0    | 0.09 | 0     | 1.56 | 0.96  | 0.43  | 0      |
| 56228 | 'Ube2j1'  | 25.52 | 19.44 | 21.2 | 48.4 | 19.8 | 10.24 | 26.9 | 24.62 | 21.19 | 18.24  |
| 56229 | 'Thsd1'   | 0     | 0     | 0.01 | 4.61 | 0    | 0     | 0.01 | 0     | 0     | 0      |
| 56233 | 'Hdac7'   | 27.05 | 42.91 | 16.5 | 13.2 | 16.1 | 13.25 | 27.1 | 14.33 | 2.94  | 35.98  |
| 56248 | 'Ak3'     | 11.97 | 17.84 | 18.6 | 16.2 | 16.1 | 6.18  | 6.19 | 8.61  | 8.52  | 1.69   |
| 56249 | 'Actr8'   | 58.3  | 71.64 | 69   | 8.73 | 72.6 | 102.1 | 42.1 | 62.89 | 77.64 | 77.93  |
| 56258 | 'Hnrrnh2' | 86.2  | 117.7 | 122  | 118  | 96.5 | 64.86 | 129  | 90.3  | 71.05 | 105.63 |
| 56264 | 'Cpxm1'   | 5.81  | 4.51  | 11.2 | 8.13 | 0    | 4.41  | 7.52 | 0.02  | 2.2   | 0.96   |
| 56273 | 'Pex14'   | 21.95 | 52.23 | 55.6 | 27   | 33.4 | 23.29 | 48.6 | 44.86 | 35.54 | 36.3   |
| 56274 | 'Stk3'    | 12.33 | 10.98 | 2.85 | 0.22 | 6.75 | 2.96  | 7.72 | 8.91  | 4.5   | 6.25   |
| 56275 | 'Rbm14'   | 17.9  | 23.9  | 10.1 | 0    | 7.75 | 16.37 | 16.7 | 7.94  | 18.29 | 14.09  |
| 56278 | 'Gkap1'   | 13.67 | 7.85  | 4.19 | 17.3 | 3.73 | 7.5   | 5.44 | 6.32  | 7.85  | 9.39   |
| 56279 | 'Fam69b'  | 16.08 | 15.25 | 15.2 | 29.2 | 23   | 29.9  | 20.5 | 19.34 | 57.28 | 12.87  |
| 56280 | 'Mrpl37'  | 32.29 | 44.95 | 54.8 | 45.7 | 65.5 | 48.83 | 65.8 | 67.79 | 23.82 | 41.11  |
| 56282 | 'Mrpl12'  | 116.8 | 88.86 | 118  | 131  | 135  | 203   | 134  | 131.4 | 204.6 | 114.03 |
| 56284 | 'Mrpl19'  | 13.96 | 7.49  | 6.87 | 7.78 | 12.9 | 9.79  | 4.79 | 8.84  | 9.71  | 10.15  |

|       |                 |       |       |      |      |      |       |      |       |       |        |
|-------|-----------------|-------|-------|------|------|------|-------|------|-------|-------|--------|
| 56289 | 'Rassf1'        | 30.77 | 43.06 | 36.6 | 44.7 | 39.3 | 27.09 | 35.3 | 32.78 | 23.8  | 39.35  |
| 56291 | 'Styx'          | 4.21  | 2.3   | 1.47 | 7.23 | 1.56 | 2.19  | 3.66 | 3.09  | 1.72  | 1.51   |
| 56292 | 'Naa10'         | 89.48 | 90.74 | 81.2 | 83   | 103  | 46.06 | 95.8 | 88.28 | 98.18 | 69.72  |
| 56293 | 'Slc35g3'       | 0.21  | 0     | 0    | 0    | 0    | 0     | 0    | 0     | 0     | 0.03   |
| 56294 | 'Ptpn9'         | 11.59 | 4.76  | 9.41 | 17.6 | 5.35 | 3.37  | 1.52 | 6.65  | 4.78  | 1.9    |
| 56295 | 'Higd1a'        | 130.9 | 112.6 | 150  | 106  | 185  | 218.9 | 112  | 105.2 | 121.2 | 91.05  |
| 56296 | 'Dmrtb1'        | 4.58  | 1.61  | 2.32 | 0    | 10.1 | 8.57  | 4.04 | 0     | 11.87 | 2.36   |
| 56297 | 'Arl6'          | 48.77 | 79.26 | 64.2 | 67.3 | 53.8 | 86.89 | 65   | 52.55 | 70.47 | 98.4   |
| 56298 | 'Atl2'          | 17.91 | 7.53  | 4.1  | 12.3 | 7.17 | 5.28  | 6.73 | 6.89  | 7.08  | 8.11   |
| 56299 | 'Fkbp1'         | 4.03  | 8.35  | 4.39 | 4.32 | 14.1 | 0.04  | 8.82 | 20.69 | 12.16 | 12.92  |
| 56305 | 'Pitpnb'        | 72.45 | 64.09 | 34.8 | 31.4 | 27.8 | 46.16 | 30.8 | 56.71 | 34.53 | 65.38  |
| 56306 | 'Sinhcaf'       | 0     | 2.66  | 0.52 | 3.6  | 5.47 | 0     | 9.52 | 0.52  | 0     | 0.03   |
| 56307 | 'Metap2'        | 49.64 | 68.06 | 51.1 | 71.9 | 52   | 64.18 | 58.3 | 68    | 46.66 | 54.27  |
| 56309 | 'Mycbp'         | 8.79  | 2.79  | 9.32 | 23.8 | 8.06 | 17.51 | 5.19 | 4.98  | 5.86  | 11.03  |
| 56310 | 'Gps2'          | 12.61 | 17.02 | 11.8 | 29.2 | 26.5 | 30.15 | 17.1 | 23.99 | 24.66 | 28.14  |
| 56312 | 'Nupr1'         | 0     | 0     | 0    | 0    | 17   | 0     | 0    | 2.36  | 0     | 0      |
| 56314 | 'Zfp113'        | 1.01  | 1.37  | 0.9  | 3    | 2.18 | 3.75  | 2.03 | 0.89  | 6.08  | 0.7    |
| 56315 | 'Rhcg'          | 3.13  | 3.85  | 0.59 | 0    | 2.08 | 0     | 0.7  | 0     | 0     | 0      |
| 56316 | 'Ggcx'          | 11.44 | 15.24 | 8.29 | 18.8 | 10.1 | 12.32 | 0.61 | 1.33  | 4.63  | 21.07  |
| 56317 | 'Anapc7'        | 34.23 | 15.5  | 26.3 | 30.7 | 8.25 | 15.39 | 7.08 | 24.8  | 10.94 | 23.62  |
| 56318 | 'Acpp'          | 0     | 0     | 0    | 0    | 2.03 | 0     | 0    | 0     | 0     | 0      |
| 56320 | 'Dbn1'          | 65.5  | 77.94 | 46.9 | 61.9 | 75.3 | 51.88 | 21.6 | 49.27 | 43.98 | 70.78  |
| 56321 | 'Aatf'          | 14.94 | 17.08 | 17.2 | 28   | 12.5 | 9.78  | 16.3 | 21.36 | 15.56 | 21.78  |
| 56322 | 'Timm22'        | 29.53 | 61.15 | 31.3 | 60.6 | 53.1 | 48.88 | 24.8 | 38.27 | 54.48 | 55.21  |
| 56323 | 'Dnajb5'        | 19.66 | 12.32 | 5.3  | 9.13 | 16.4 | 5.58  | 8.31 | 19.57 | 35.15 | 9.11   |
| 56324 | 'Stam2'         | 14.58 | 9.28  | 1.58 | 3.83 | 2.53 | 0.23  | 9.69 | 7.3   | 9.88  | 11.19  |
| 56325 | 'Abcb9'         | 8.19  | 19.09 | 16.9 | 0.88 | 2.1  | 8.78  | 16.7 | 8.71  | 6.02  | 2.36   |
| 56327 | 'Arl2'          | 339.4 | 262.8 | 326  | 282  | 323  | 399.9 | 320  | 391.9 | 375.7 | 324.96 |
| 56330 | 'Pdcd5'         | 164.8 | 197.4 | 235  | 206  | 192  | 258.4 | 187  | 178.8 | 227.2 | 147.75 |
| 56332 | 'Amotl2'        | 1.27  | 6.24  | 0.71 | 9.57 | 0.06 | 0.82  | 14.9 | 3.2   | 2.36  | 0.01   |
| 56334 | 'Tmed2'         | 96.48 | 101   | 112  | 184  | 61.9 | 67.57 | 73   | 69.27 | 159.3 | 48.23  |
| 56335 | 'Mettl3'        | 8.85  | 12.25 | 6.52 | 2.68 | 25.4 | 9.46  | 9.88 | 15.18 | 18.86 | 7.65   |
| 56336 | 'B4galt5'       | 2.68  | 3.13  | 6.03 | 0.83 | 7.76 | 7.06  | 1.71 | 5.32  | 6.43  | 2.8    |
| 56338 | 'Txnip'         | 2.28  | 3.85  | 0.1  | 5.79 | 0.02 | 3.94  | 0.05 | 1.65  | 0.03  | 0.05   |
| 56347 | 'Eif3c'         | 61.69 | 90.65 | 84.3 | 77.5 | 54.8 | 42.07 | 70.3 | 61.37 | 72.23 | 68.25  |
| 56348 | 'Hsd17b12'      | 99.37 | 102.5 | 92   | 27.2 | 57.6 | 103.6 | 66.9 | 68.82 | 116.8 | 126.94 |
| 56349 | 'Net1'          | 0.35  | 0.58  | 0.77 | 9.5  | 0.09 | 3.19  | 0.01 | 1.33  | 2.38  | 0      |
| 56350 | 'Arl3'          | 221.6 | 280.8 | 211  | 313  | 295  | 275.1 | 254  | 215.3 | 234.4 | 240.48 |
| 56351 | 'Ptges3'        | 147.9 | 162.4 | 130  | 87.2 | 135  | 135.3 | 105  | 118.2 | 156.3 | 119.34 |
| 56353 | 'Rybp'          | 5.16  | 2.94  | 2.24 | 10.1 | 2.38 | 3.09  | 1.53 | 2.34  | 0.87  | 5.67   |
| 56354 | 'Dnajc7'        | 113.3 | 143.3 | 177  | 78.4 | 141  | 144.1 | 155  | 199.3 | 125.2 | 179.39 |
| 56356 | 'Gltp'          | 11.01 | 6.1   | 17   | 17.1 | 44.7 | 24.99 | 11.8 | 4.64  | 9.2   | 12.06  |
| 56357 | 'Ivd'           | 46.39 | 55.58 | 44.7 | 47.8 | 46.5 | 80.11 | 61.7 | 62.9  | 50.01 | 57.98  |
| 56358 | 'Copz2'         | 3.47  | 0     | 0    | 0    | 3.14 | 0     | 0    | 2.43  | 0     | 0      |
| 56360 | 'Acot9'         | 22.36 | 17.93 | 32.8 | 31.1 | 28.6 | 25.17 | 12   | 16.03 | 22.45 | 24.07  |
| 56361 | 'Pus1'          | 12.78 | 15.56 | 13.4 | 15.3 | 4.04 | 12.35 | 9.32 | 13.12 | 10.22 | 3.91   |
| 56363 | 'Tmeff2'        | 92.76 | 88.61 | 33.5 | 31.4 | 21   | 24.8  | 54.5 | 59.77 | 4.32  | 18.88  |
| 56364 | 'Zmym3'         | 22.84 | 22.4  | 21.7 | 29.2 | 43.5 | 28.42 | 39.5 | 23.31 | 37.91 | 26.96  |
| 56367 | 'Scoc'          | 266.5 | 240.6 | 180  | 168  | 169  | 233.3 | 215  | 218.5 | 182.2 | 180.54 |
| 56368 | 'Cyb561d2'      | 39.73 | 39.95 | 44.1 | 30.7 | 27   | 9.18  | 68.4 | 39.05 | 55.76 | 49.82  |
| 56369 | 'Apip'          | 47.1  | 30.81 | 13.2 | 12.4 | 16.7 | 46.09 | 23.1 | 26.51 | 19.43 | 20.78  |
| 56370 | 'Tagln3'        | 587.3 | 531.4 | 447  | 800  | 618  | 598   | 574  | 650.9 | 445.4 | 481.28 |
| 56371 | 'Fzr1'          | 35.05 | 13.29 | 17.7 | 47.9 | 47.2 | 30.14 | 25.3 | 32.12 | 30.53 | 21.85  |
| 56372 | '1110004F10Rik' | 255.6 | 212.5 | 201  | 266  | 234  | 173.2 | 208  | 238.6 | 256.3 | 233.16 |
| 56373 | 'Cpb2'          | 0     | 0     | 0    | 0    | 0    | 0.16  | 0    | 0.14  | 0     | 0      |
| 56374 | 'Tmem59'        | 479.6 | 431.9 | 336  | 406  | 368  | 582.5 | 434  | 477.4 | 523.8 | 598.52 |
| 56375 | 'B4galt4'       | 13.14 | 16.09 | 13.1 | 0.03 | 9.51 | 12.38 | 11.5 | 17.85 | 16.1  | 7.32   |
| 56376 | 'Pdim5'         | 0.11  | 0.16  | 5.06 | 0.13 | 7.92 | 4.5   | 3.44 | 1.88  | 18.5  | 5.23   |

|       |            |       |       |      |      |      |       |      |       |       |        |
|-------|------------|-------|-------|------|------|------|-------|------|-------|-------|--------|
| 56378 | 'Arpc3'    | 165.5 | 174.2 | 96.1 | 82.1 | 167  | 148.1 | 129  | 186   | 205.3 | 148.06 |
| 56379 | 'Kcnj1'    | 0     | 0     | 0.02 | 0    | 0    | 0     | 0    | 0     | 0     | 0      |
| 56380 | 'Arid3b'   | 0.93  | 0     | 0.39 | 0.18 | 1.55 | 0     | 0    | 1.25  | 0     | 1.62   |
| 56381 | 'Spen'     | 1.55  | 0.38  | 0.61 | 1.78 | 0.97 | 1.38  | 2.27 | 1.45  | 1.9   | 1.32   |
| 56382 | 'Rab9'     | 25.41 | 32.66 | 37.9 | 28.9 | 49.3 | 19.95 | 14.9 | 32.94 | 16.45 | 25.57  |
| 56384 | 'Letm1'    | 28.97 | 36.12 | 35.8 | 58.7 | 20.3 | 15.68 | 27.6 | 16.42 | 56.28 | 15.62  |
| 56386 | 'B4galt6'  | 9.29  | 3.43  | 6.23 | 8.27 | 9.64 | 4.42  | 5.89 | 3.81  | 9.27  | 4.34   |
| 56389 | 'Stx5a'    | 61.24 | 44.58 | 29.8 | 34.6 | 29.8 | 38.59 | 38   | 33.57 | 47.23 | 38.09  |
| 56390 | 'Sssca1'   | 125.5 | 105.9 | 129  | 152  | 96.1 | 129.4 | 103  | 117.2 | 103   | 104.48 |
| 56392 | 'Shoc2'    | 9.65  | 8.45  | 8.99 | 15.3 | 9.88 | 5.85  | 7.69 | 9.79  | 18.04 | 11.05  |
| 56395 | 'Tmem115'  | 27.32 | 28.59 | 25.9 | 20.1 | 34.7 | 29.86 | 21.1 | 22.34 | 16.15 | 20.78  |
| 56397 | 'Morf4l2'  | 316.5 | 388.4 | 313  | 388  | 230  | 310.1 | 228  | 275.6 | 322.6 | 252.61 |
| 56398 | 'Chp1'     | 63.92 | 58.79 | 74.9 | 36.4 | 63.9 | 72.5  | 79.6 | 66.37 | 69.53 | 64.82  |
| 56399 | 'Akap8'    | 22.93 | 23.78 | 21.2 | 22.8 | 15.3 | 20.74 | 41.7 | 14.68 | 34.96 | 32.52  |
| 56401 | 'P3h1'     | 3.71  | 2.21  | 5.71 | 4.19 | 0.64 | 0.11  | 2.82 | 1.76  | 1.08  | 0.07   |
| 56403 | 'Syncrip'  | 7.75  | 15.74 | 4.7  | 17   | 13   | 12.35 | 28.3 | 11.49 | 15.71 | 15.81  |
| 56404 | 'Trip4'    | 3.73  | 4.75  | 13.3 | 7.38 | 3.25 | 5.26  | 1.89 | 2.04  | 8.19  | 5.11   |
| 56405 | 'Dusp14'   | 22.05 | 26.17 | 9.33 | 70.6 | 23.4 | 7.78  | 26.7 | 21.23 | 15.88 | 22.85  |
| 56406 | 'Ncoa6'    | 1.28  | 1.33  | 1.31 | 0.26 | 3.7  | 0.71  | 0    | 2.73  | 1.03  | 2.64   |
| 56407 | 'Trpc4ap'  | 21.45 | 14.19 | 15   | 6.8  | 19.7 | 14.49 | 6.3  | 14.53 | 35    | 14.51  |
| 56409 | 'Nudt3'    | 60.17 | 39.06 | 29.9 | 64.3 | 61.3 | 39.35 | 49.1 | 42.09 | 61.81 | 32.36  |
| 56410 | 'Cbln3'    | 0.02  | 0.12  | 0.2  | 0.11 | 0.11 | 0.23  | 0.08 | 0.06  | 0.12  | 0.12   |
| 56412 | 'Noa1'     | 10.39 | 13.16 | 7.39 | 9.6  | 2.95 | 4.26  | 8.43 | 3.94  | 9.99  | 10.8   |
| 56417 | 'Adar'     | 16.6  | 16.75 | 37.5 | 14.4 | 13.5 | 7.14  | 30.8 | 17.4  | 15.81 | 18.09  |
| 56418 | 'Ykt6'     | 21.07 | 24    | 24.6 | 15.8 | 24.4 | 32.68 | 33.1 | 23.62 | 26.35 | 25.16  |
| 56419 | 'Diaph3'   | 1.52  | 2.34  | 0.36 | 3.2  | 1.74 | 0.01  | 0    | 2.44  | 1.64  | 0.73   |
| 56420 | 'Ppp4c'    | 33.25 | 18.99 | 26.3 | 31.3 | 43.9 | 16.93 | 19.9 | 31.61 | 12.71 | 26.61  |
| 56421 | 'Pfkp'     | 114.3 | 72.5  | 81.9 | 49.8 | 68.2 | 46.39 | 124  | 129   | 98.01 | 95.52  |
| 56422 | 'Hbs1l'    | 23.97 | 31.8  | 25.4 | 29.8 | 37.4 | 16.1  | 44.4 | 22.75 | 18.51 | 37.73  |
| 56424 | 'Stub1'    | 338.6 | 293.5 | 320  | 367  | 308  | 411.1 | 339  | 320.4 | 353.1 | 157.32 |
| 56426 | 'Pdcd10'   | 47.96 | 45.15 | 45.4 | 25.5 | 52.6 | 66.18 | 58.8 | 54.19 | 55.32 | 72.71  |
| 56427 | 'Tubd1'    | 11.49 | 0     | 13.5 | 8.5  | 6.81 | 7     | 18.8 | 2.88  | 9.31  | 4.41   |
| 56428 | 'Mtch2'    | 129.4 | 73.85 | 117  | 53.1 | 111  | 134.7 | 119  | 124.8 | 106.9 | 111.11 |
| 56429 | 'Dpt'      | 0.98  | 0     | 0.3  | 0    | 0    | 0     | 0    | 0.37  | 0     | 0      |
| 56430 | 'Clip1'    | 14.12 | 29.44 | 16.6 | 26.3 | 18.8 | 29.95 | 19.7 | 17.01 | 18.97 | 25.18  |
| 56431 | 'Dstn'     | 147.2 | 150.3 | 104  | 152  | 128  | 114.3 | 140  | 88.58 | 92.94 | 147.67 |
| 56433 | 'Vps29'    | 246.9 | 234.8 | 221  | 309  | 284  | 270.4 | 215  | 322.9 | 246.8 | 218.3  |
| 56434 | 'Tspan3'   | 561.7 | 609.5 | 628  | 567  | 394  | 618.7 | 473  | 595.6 | 529.2 | 524.7  |
| 56436 | 'Adrm1'    | 119.5 | 120.7 | 181  | 212  | 141  | 159.5 | 188  | 161.4 | 166.3 | 121.08 |
| 56437 | 'Rrad'     | 10.9  | 28.82 | 27.1 | 93.6 | 17.2 | 1.18  | 6.55 | 1.47  | 13.91 | 7.88   |
| 56438 | 'Rbx1'     | 211.3 | 202.9 | 216  | 288  | 206  | 295.3 | 191  | 196.9 | 268.2 | 219.48 |
| 56440 | 'Snx1'     | 38.98 | 36.31 | 65.4 | 49.6 | 52.2 | 54.46 | 79.8 | 47.38 | 62.7  | 54.63  |
| 56441 | 'Naa80'    | 19.99 | 16.16 | 12.9 | 33.6 | 15.1 | 22.98 | 22.3 | 14.75 | 33.6  | 18.65  |
| 56442 | 'Serinc1'  | 324.8 | 399.1 | 355  | 289  | 273  | 207.7 | 344  | 358.1 | 373.1 | 260.62 |
| 56443 | 'Arpc1a'   | 129.4 | 171.6 | 165  | 70.1 | 183  | 205.9 | 205  | 175.3 | 241.4 | 260.38 |
| 56444 | 'Actr10'   | 52.4  | 57.41 | 57.3 | 71.7 | 50.4 | 67.9  | 54.6 | 32.86 | 59.08 | 36.38  |
| 56445 | 'Dnaja2'   | 89.49 | 69.52 | 82.5 | 94.4 | 63.1 | 77.6  | 71.7 | 86.5  | 65.46 | 88.81  |
| 56447 | 'Copz1'    | 138.4 | 130   | 136  | 147  | 151  | 207.9 | 199  | 180.7 | 163.9 | 160.99 |
| 56448 | 'Cyp2d22'  | 0.76  | 3.62  | 0    | 0    | 0.12 | 11.04 | 0    | 4.84  | 3.07  | 3.45   |
| 56449 | 'Ybx3'     | 2.76  | 1.93  | 1.11 | 0    | 0.78 | 3.28  | 0    | 0.24  | 0     | 0.26   |
| 56451 | 'Suclg1'   | 159.6 | 186.6 | 186  | 207  | 193  | 358.2 | 287  | 220   | 206.4 | 212.13 |
| 56452 | 'Orc6'     | 16.94 | 27.14 | 23.8 | 12.1 | 20.8 | 33.6  | 11.2 | 26.89 | 14.59 | 17.14  |
| 56453 | 'Mbtps1'   | 18.81 | 17.78 | 18.4 | 17.1 | 36.3 | 4.3   | 34.3 | 25.94 | 24.23 | 36.06  |
| 56454 | 'Aldh18a1' | 11.86 | 11.86 | 4.29 | 11.7 | 12.4 | 8.76  | 8.49 | 9.19  | 10.15 | 6.63   |
| 56455 | 'Dynll1'   | 251.4 | 242.2 | 229  | 188  | 255  | 271.7 | 189  | 215.8 | 174.7 | 234.11 |
| 56456 | 'Actl6a'   | 5.63  | 4.55  | 8.96 | 1.65 | 11   | 8.96  | 5.69 | 10.39 | 6.85  | 14.16  |
| 56457 | 'Clptm1'   | 47.8  | 34.52 | 84.5 | 103  | 41.7 | 19    | 59.6 | 47.93 | 61.91 | 10.76  |
| 56458 | 'Foxo1'    | 0.3   | 2.76  | 0    | 1.64 | 4.07 | 5.14  | 0    | 1.72  | 0.39  | 3.07   |



|       |            |       |       |      |      |      |       |      |       |       |        |
|-------|------------|-------|-------|------|------|------|-------|------|-------|-------|--------|
| 56459 | 'Sae1'     | 119.1 | 145.7 | 94.5 | 73.6 | 117  | 127.2 | 132  | 130.6 | 117.5 | 132.35 |
| 56460 | 'Pkp3'     | 0     | 0     | 0    | 0    | 0    | 0     | 0    | 0     | 2.51  | 5.03   |
| 56461 | 'Kcnip3'   | 19.3  | 13.63 | 59.1 | 10.3 | 0.32 | 29.23 | 57.4 | 17.14 | 11.9  | 31.4   |
| 56462 | 'Mtc1'     | 132.6 | 101.4 | 130  | 126  | 164  | 164.6 | 176  | 102.7 | 92.62 | 96.52  |
| 56463 | 'Snd1'     | 42.2  | 40.64 | 36.6 | 60.5 | 20.4 | 30.29 | 20.2 | 30.19 | 27.68 | 55.5   |
| 56464 | 'Ctsf'     | 46.49 | 78.02 | 78.4 | 35.4 | 64.9 | 78.87 | 48.2 | 58.2  | 86.1  | 71.8   |
| 56468 | 'Socs5'    | 10.45 | 13.59 | 6.46 | 8.04 | 6.87 | 4.02  | 1.9  | 4.43  | 10.5  | 5.8    |
| 56469 | 'Pias1'    | 14.39 | 32.85 | 16.4 | 9.65 | 25.9 | 14.7  | 28.7 | 23.1  | 33.87 | 27.08  |
| 56470 | 'Rgs19'    | 49.19 | 41.09 | 40.9 | 37   | 23.1 | 45.3  | 52.5 | 64.54 | 57.59 | 79.29  |
| 56471 | 'Stmn4'    | 166.2 | 125.7 | 77.6 | 155  | 185  | 128.5 | 91.3 | 122.3 | 82.36 | 110.6  |
| 56473 | 'Fads2'    | 33.05 | 40.45 | 24.3 | 14.4 | 11.3 | 34.7  | 31.1 | 17.45 | 47.24 | 4.04   |
| 56480 | 'Tbk1'     | 34.1  | 12.64 | 22.6 | 35.9 | 20.2 | 18.86 | 27.6 | 24.99 | 22.92 | 40.56  |
| 56484 | 'Foxo3'    | 0.4   | 1.34  | 1.98 | 1.14 | 0.99 | 0.48  | 2.84 | 1.4   | 2.87  | 1.96   |
| 56485 | 'Slc2a5'   | 0     | 0     | 0    | 0    | 0    | 6.24  | 0    | 0     | 2.72  | 1.71   |
| 56486 | 'Gabarap'  | 287.9 | 251.1 | 249  | 243  | 253  | 270.8 | 187  | 254.2 | 265.9 | 277.6  |
| 56488 | 'Nxt1'     | 17.26 | 9.86  | 8.49 | 33.9 | 20.9 | 4.25  | 10.8 | 17.11 | 20.58 | 10.53  |
| 56489 | 'Ikbke'    | 0     | 2.15  | 0    | 0    | 0    | 0     | 0    | 0     | 0.74  | 0.49   |
| 56490 | 'Zbtb20'   | 69.24 | 48.78 | 38.2 | 52   | 14.9 | 13.41 | 13.8 | 23.41 | 18.07 | 25.46  |
| 56491 | 'Vapb'     | 6.12  | 14.92 | 6.91 | 10.2 | 6.63 | 6.56  | 9.13 | 5.2   | 6.14  | 5.27   |
| 56494 | 'Gosr2'    | 52.7  | 67.81 | 57   | 54.5 | 62.7 | 31.56 | 61.7 | 52.02 | 35.47 | 84.34  |
| 56495 | 'Asna1'    | 70.36 | 69.11 | 88.7 | 58.8 | 114  | 56.06 | 52.3 | 88.76 | 95.98 | 65.9   |
| 56496 | 'Tspan6'   | 68.23 | 67.97 | 64.5 | 62.6 | 27.8 | 70.11 | 45.3 | 60.04 | 38.92 | 81.08  |
| 56501 | 'Elf4'     | 0     | 0.63  | 0    | 0.01 | 0    | 0     | 0    | 0     | 1.44  | 0.48   |
| 56503 | 'Ankrd49'  | 6.21  | 0.63  | 4.39 | 0.62 | 5.31 | 7.53  | 9.68 | 5.18  | 6.87  | 3.19   |
| 56504 | 'Srpk3'    | 3.28  | 2.31  | 3.11 | 0.09 | 4.46 | 3.35  | 0    | 0     | 13.29 | 0.02   |
| 56505 | 'Ruvbl1'   | 72.54 | 88.99 | 62   | 68.1 | 63.3 | 79.74 | 66.9 | 53.69 | 84.89 | 79.99  |
| 56506 | 'Cib2'     | 81.28 | 128   | 79.4 | 83.7 | 42.1 | 89.13 | 134  | 43.74 | 61.22 | 34.79  |
| 56508 | 'Rapgef4'  | 26.32 | 17.49 | 13.8 | 29.3 | 20   | 16.64 | 7.71 | 22.43 | 10.4  | 29.27  |
| 56513 | 'Pard6a'   | 20.46 | 25.58 | 46.5 | 21.3 | 9.93 | 17.57 | 40.5 | 27.59 | 47.55 | 48.06  |
| 56515 | 'Rnf138'   | 11.29 | 8.54  | 6.35 | 18.6 | 3.18 | 1.55  | 9.44 | 4.42  | 15.34 | 9.42   |
| 56516 | 'Rbms2'    | 0.3   | 0     | 1.15 | 0    | 0.52 | 0     | 0.03 | 0     | 0     | 0.25   |
| 56517 | 'Slc22a21' | 1.51  | 3.81  | 3.15 | 7.52 | 6.32 | 2.71  | 4.9  | 3.7   | 11.73 | 3.24   |
| 56520 | 'Nme4'     | 0.11  | 11.28 | 3.79 | 10.8 | 3.22 | 14.27 | 0    | 4.1   | 13.62 | 27.72  |
| 56523 | 'Pmfbp1'   | 0.01  | 0.28  | 0.03 | 0.03 | 0.04 | 0.32  | 0.29 | 0.01  | 1.28  | 0.04   |
| 56524 | 'Mpp6'     | 2.1   | 5.01  | 2.2  | 3.96 | 1.78 | 2     | 1.17 | 2.49  | 0.63  | 1.79   |
| 56525 | 'Zfp235'   | 6.61  | 0.91  | 3.82 | 5.85 | 5.98 | 2.84  | 8.45 | 6.67  | 5.81  | 3.3    |
| 56526 | 'Sept6'    | 12.8  | 12.84 | 30.8 | 25.1 | 23.5 | 5.15  | 9.27 | 11.25 | 10.76 | 14.55  |
| 56527 | 'Mast1'    | 13.24 | 18.1  | 31.1 | 9.85 | 14   | 6.22  | 14.7 | 15.34 | 26.2  | 11.67  |
| 56529 | 'Sec11a'   | 114.3 | 91.22 | 52.3 | 156  | 83.2 | 110.4 | 53.6 | 73.54 | 104.5 | 73.33  |
| 56530 | 'Cnpy2'    | 181.1 | 285.6 | 169  | 141  | 152  | 241.3 | 161  | 194.3 | 265.1 | 214.4  |
| 56531 | 'Ylpm1'    | 6.88  | 9.15  | 8    | 13.4 | 17   | 9.27  | 16.8 | 6.06  | 12.97 | 7.35   |
| 56533 | 'Rgs17'    | 17.63 | 15.56 | 14   | 11.6 | 14.3 | 14.65 | 10.1 | 15.05 | 12.26 | 9.08   |
| 56534 | 'Hspb3'    | 0     | 20    | 0.13 | 0    | 1.66 | 0     | 0    | 0.05  | 0     | 3.88   |
| 56535 | 'Pex3'     | 20.19 | 15.77 | 20   | 3.01 | 9.9  | 27.07 | 14.2 | 13.87 | 17.54 | 28.07  |
| 56541 | 'Habp4'    | 35.45 | 21.08 | 9.13 | 104  | 20.6 | 23.91 | 45.4 | 19.97 | 44.97 | 18.65  |
| 56542 | 'Ick'      | 0.23  | 1.15  | 1.54 | 0    | 0.77 | 0.17  | 0.27 | 0.27  | 4.21  | 0      |
| 56543 | 'Kcnd3'    | 1.66  | 2.8   | 5.93 | 10.4 | 2.31 | 2.23  | 8.78 | 3.12  | 2.34  | 1.54   |
| 56544 | 'Vmn2r1'   | 0.01  | 0.15  | 0.19 | 0    | 0    | 0.19  | 0    | 0     | 1.25  | 0      |
| 56550 | 'Ube2d2a'  | 63.69 | 67.76 | 58.1 | 81.8 | 64.6 | 40.65 | 43.9 | 70.32 | 74.66 | 50.28  |
| 56551 | 'Txn2'     | 210.4 | 231.3 | 184  | 339  | 245  | 301   | 197  | 177.1 | 269.6 | 312.18 |
| 56612 | 'Pfdn5'    | 277.9 | 201.2 | 292  | 312  | 205  | 290.6 | 212  | 212.4 | 169.8 | 219.82 |
| 56613 | 'Rps6ka4'  | 6.27  | 16.26 | 10.5 | 0.02 | 5.62 | 11.79 | 4.05 | 6.82  | 10.77 | 20.03  |
| 56615 | 'Mgst1'    | 14.2  | 12.45 | 0.32 | 9.85 | 8.14 | 18.09 | 21.8 | 10.6  | 13.7  | 3.54   |
| 56620 | 'Clec4n'   | 0.04  | 0     | 0    | 0    | 0    | 6.47  | 0    | 0     | 0     | 0      |
| 56622 | 'Adam21'   | 0     | 0     | 0    | 0    | 1.71 | 0.25  | 0    | 0     | 1.42  | 0      |
| 56626 | 'Poll'     | 14.96 | 15.33 | 1.72 | 0    | 13.2 | 9.4   | 8.18 | 3.3   | 15.78 | 8.81   |
| 56631 | 'Trim17'   | 6.65  | 10.51 | 11.9 | 11.2 | 14.8 | 8.41  | 7.11 | 8.59  | 11.64 | 10.78  |
| 56632 | 'Sphk2'    | 6.02  | 8.83  | 11.7 | 0.68 | 6.49 | 4.61  | 6.86 | 3.45  | 7.18  | 6.43   |

|       |            |       |       |      |      |      |       |      |       |       |        |
|-------|------------|-------|-------|------|------|------|-------|------|-------|-------|--------|
| 56636 | 'Fgf21'    | 0     | 0     | 0    | 0    | 0    | 0.05  | 0    | 0     | 0     | 0.05   |
| 56637 | 'Gsk3b'    | 75.32 | 87.73 | 45.3 | 96.2 | 90.3 | 68.64 | 56.8 | 93.97 | 69.21 | 77.49  |
| 56642 | 'Ankrd2'   | 1.65  | 6.52  | 21   | 0    | 22.2 | 16.09 | 0    | 1.84  | 25.46 | 6.48   |
| 56643 | 'Slc15a1'  | 0     | 0     | 0    | 0    | 0    | 0     | 0    | 1.07  | 0     | 0      |
| 56690 | 'Mlycd'    | 1.93  | 1.96  | 8.82 | 4.73 | 5.46 | 5.14  | 3.5  | 8.84  | 11.34 | 2.09   |
| 56692 | 'Lamtor3'  | 100.8 | 44.28 | 70.6 | 67   | 53   | 81.11 | 75.7 | 68.07 | 93.72 | 79.85  |
| 56693 | 'Crtap'    | 4.74  | 10.02 | 1.89 | 7.47 | 7.93 | 4.62  | 0.03 | 7.42  | 15.91 | 0      |
| 56695 | 'Pnkd'     | 82.52 | 93.7  | 128  | 122  | 105  | 71.58 | 100  | 98.94 | 123.2 | 83.66  |
| 56697 | 'Akap10'   | 2.03  | 5.28  | 3.43 | 6.26 | 1.77 | 0.5   | 2.86 | 3.49  | 7.45  | 0.59   |
| 56698 | 'Phax'     | 46.93 | 33.44 | 51.5 | 22.6 | 54.4 | 51.56 | 34.7 | 50.12 | 48.91 | 34.56  |
| 56699 | 'Cdc42ep4' | 5.96  | 14.39 | 7.76 | 16.4 | 8.63 | 13.72 | 9.95 | 16.87 | 3.32  | 6.64   |
| 56700 | 'Glimp'    | 34.2  | 24.54 | 29.3 | 10.9 | 23.4 | 42.26 | 12.8 | 42.08 | 56.28 | 33.58  |
| 56702 | 'Hist1h1b' | 0     | 0     | 0.13 | 0    | 0    | 0     | 0.27 | 0     | 0     | 0      |
| 56703 | 'Pigo'     | 12.21 | 11.86 | 7.98 | 2.1  | 12.9 | 4.45  | 5.99 | 6.27  | 6.24  | 5.7    |
| 56705 | 'Ranbp9'   | 0.27  | 4.07  | 3.3  | 3.94 | 4.48 | 0.47  | 2.94 | 0.01  | 8.6   | 5.45   |
| 56706 | 'Ccn11'    | 23.99 | 37.9  | 40.8 | 63   | 14.8 | 39.28 | 23.1 | 22.73 | 14.63 | 22.69  |
| 56707 | 'Zfp111'   | 0.14  | 1.97  | 0.23 | 2.06 | 0.39 | 0.35  | 1.89 | 0.39  | 3.29  | 2.97   |
| 56709 | 'Dnajb12'  | 7.12  | 16.15 | 14.4 | 0.06 | 9.69 | 17.2  | 14.7 | 13.25 | 11.07 | 10.15  |
| 56710 | 'Brinp1'   | 22.25 | 17.75 | 56.5 | 25.4 | 48.4 | 55.67 | 73   | 40.08 | 103.4 | 64.21  |
| 56711 | 'Plag1'    | 0     | 0     | 0.02 | 0    | 0.03 | 0     | 0.07 | 0.15  | 0.3   | 0.12   |
| 56715 | 'Rabgef1'  | 17.4  | 19.44 | 16.1 | 14.7 | 17.8 | 9.02  | 7.24 | 19.7  | 16.92 | 28.17  |
| 56716 | 'Mlst8'    | 9.16  | 15.15 | 6.8  | 2.98 | 10.8 | 2.88  | 13.1 | 11.14 | 12.43 | 12.79  |
| 56717 | 'Mtor'     | 2.44  | 3.09  | 10.8 | 4.21 | 2.53 | 2.14  | 4.93 | 2.82  | 2.45  | 2.4    |
| 56720 | 'Tdo2'     | 0     | 0     | 0    | 0    | 0    | 0     | 0    | 0     | 3.23  | 0      |
| 56722 | 'Litaf'    | 8.49  | 10.16 | 5.33 | 0    | 4.75 | 33.71 | 0.02 | 1.38  | 0.02  | 0.82   |
| 56724 | 'Cript'    | 107.2 | 95.2  | 60   | 100  | 59.3 | 101.9 | 47.2 | 86.94 | 59.36 | 100.94 |
| 56726 | 'Sh3bgrl'  | 21.05 | 22.11 | 35.6 | 8.22 | 30.7 | 14.97 | 18.2 | 27.34 | 43.5  | 29.8   |
| 56734 | 'Tulp2'    | 0     | 0.34  | 0    | 0    | 0.77 | 0.19  | 1.56 | 0     | 0.08  | 0.17   |
| 56735 | 'Krt71'    | 0     | 0     | 0    | 0    | 0    | 0     | 9.5  | 0     | 0     | 0      |
| 56736 | 'Rnf14'    | 175   | 187.5 | 227  | 104  | 149  | 145.7 | 185  | 218.9 | 212.5 | 210.71 |
| 56737 | 'Alg2'     | 164.6 | 227.8 | 230  | 185  | 178  | 148.8 | 199  | 250.2 | 186.2 | 282.06 |
| 56738 | 'Mocs1'    | 1.36  | 7.6   | 3.17 | 0    | 6.52 | 3.49  | 0    | 4.78  | 8.69  | 3.23   |
| 56739 | 'Rec8'     | 16.31 | 12.86 | 14.9 | 11.5 | 13   | 3.58  | 9.7  | 2.31  | 3.5   | 13.01  |
| 56741 | 'Igdcc4'   | 6.15  | 2.43  | 4.45 | 4.01 | 4.07 | 1.94  | 3.06 | 1.94  | 4.32  | 4.53   |
| 56742 | 'Psrc1'    | 0     | 0     | 0    | 0    | 0    | 0.16  | 0    | 0     | 0     | 0      |
| 56743 | 'Lat2'     | 0.15  | 3.15  | 1.54 | 0    | 2.4  | 33.59 | 13.3 | 7.65  | 5.19  | 0      |
| 56744 | 'Pf4'      | 0     | 0     | 0    | 0    | 3    | 0     | 0    | 0     | 0     | 0      |
| 56745 | 'C1qtnf1'  | 0     | 1.05  | 0.07 | 0    | 0    | 0     | 0    | 1.14  | 0.01  | 0      |
| 56746 | 'Tex101'   | 0     | 0     | 0    | 0    | 0    | 0.04  | 0    | 0     | 0     | 0      |
| 56747 | 'Sez6l'    | 15.44 | 28.37 | 39   | 43.2 | 6.81 | 6.44  | 17.7 | 28.97 | 2.92  | 5.22   |
| 56748 | 'Nfu1'     | 217.5 | 201.9 | 158  | 248  | 171  | 169.8 | 199  | 236.7 | 161.8 | 192.24 |
| 56749 | 'Dhodh'    | 29.25 | 25.01 | 16.2 | 7.6  | 27.3 | 24.83 | 30.5 | 18.93 | 24.91 | 17.39  |
| 56752 | 'Aldh9a1'  | 52.34 | 21.74 | 37.5 | 30   | 24.7 | 21.11 | 17.9 | 23.21 | 27.95 | 21.33  |
| 56753 | 'Tacstd2'  | 0     | 5.21  | 0    | 0    | 0    | 0     | 0    | 0     | 13.46 | 1.97   |
| 56758 | 'Mbnl1'    | 16.22 | 17.57 | 12.8 | 21.9 | 21.2 | 12.1  | 27.3 | 15.38 | 13.97 | 18.36  |
| 56771 | 'Med20'    | 41.39 | 22.42 | 27.9 | 41.9 | 20.1 | 54.16 | 43.6 | 29.48 | 47.7  | 46.79  |
| 56772 | 'Mllt11'   | 243.3 | 212.8 | 173  | 264  | 196  | 316.1 | 192  | 348.7 | 227.3 | 235.81 |
| 56773 | 'Chst5'    | 2.03  | 0     | 1.4  | 10.1 | 0.64 | 4.52  | 0    | 6.98  | 8.07  | 2.32   |
| 56784 | 'Ralgapa1' | 2.75  | 3.7   | 5.23 | 8.71 | 5.28 | 3.02  | 1.48 | 2.01  | 3.11  | 4.75   |
| 56786 | 'Tmem9b'   | 109.6 | 141.8 | 139  | 90.1 | 109  | 173.9 | 178  | 166.8 | 149.8 | 94.52  |
| 56788 | 'Scube2'   | 0     | 2.14  | 0.03 | 7.43 | 0.4  | 0     | 6.52 | 0.98  | 0.01  | 0.97   |
| 56790 | 'Supt20'   | 24.35 | 17.36 | 8.17 | 24.6 | 9.81 | 4.32  | 9.09 | 10.07 | 14.74 | 18.38  |
| 56791 | 'Ube2l6'   | 3.28  | 3.13  | 8.53 | 45.7 | 7.65 | 4.13  | 0.07 | 4.09  | 4.69  | 4.73   |
| 56792 | 'Stap1'    | 0.1   | 0     | 0    | 0    | 0.81 | 0.31  | 1.36 | 0     | 0.01  | 0      |
| 56794 | 'Hacl1'    | 4.41  | 1.97  | 0.02 | 15.9 | 7.35 | 3.96  | 7.39 | 0     | 5.07  | 1.63   |
| 56795 | 'Arl10'    | 70.79 | 56.27 | 110  | 41.8 | 20.2 | 41.1  | 89.9 | 29.44 | 46    | 13     |
| 56805 | 'Zbtb33'   | 0.75  | 0.05  | 0.88 | 0    | 0.47 | 0     | 0    | 0.47  | 0     | 2.11   |
| 56807 | 'Scamp5'   | 124.5 | 104.9 | 176  | 39.4 | 82.6 | 85.78 | 150  | 97.78 | 91.42 | 130.79 |

|       |            |       |       |      |      |      |       |      |       |       |        |
|-------|------------|-------|-------|------|------|------|-------|------|-------|-------|--------|
| 56808 | 'Cacna2d2' | 2.06  | 0.9   | 1.89 | 1.58 | 5.89 | 3.41  | 2.73 | 1.46  | 6.06  | 2.79   |
| 56809 | 'Gmeb1'    | 5.81  | 3.25  | 5.14 | 3.22 | 6.69 | 4.06  | 8.81 | 1.85  | 6.5   | 6.37   |
| 56811 | 'Dkk2'     | 0     | 0     | 0    | 0    | 0    | 0     | 0    | 0     | 1.61  | 1.77   |
| 56812 | 'Dnajb2'   | 45.41 | 54.2  | 45.5 | 36.3 | 37.3 | 38.61 | 25.6 | 27.04 | 32.1  | 32.8   |
| 56838 | 'Ccl28'    | 0     | 0     | 0    | 0    | 0.07 | 0     | 0    | 0     | 0.3   | 0      |
| 56839 | 'Lgi1'     | 13.98 | 22.45 | 9.9  | 0    | 11.2 | 22.97 | 31.1 | 21.33 | 9.67  | 11.82  |
| 56844 | 'Tssc4'    | 90.51 | 55.4  | 81.6 | 105  | 71   | 105.6 | 54   | 82.73 | 95.1  | 90.91  |
| 56846 | 'Necab3'   | 14.07 | 20.6  | 52.7 | 8.76 | 26.1 | 27.54 | 19   | 38.63 | 14.65 | 13.03  |
| 56856 | 'Insm2'    | 1.36  | 2.12  | 0.17 | 4.01 | 0    | 2.3   | 0    | 0     | 2.21  | 11.04  |
| 56857 | 'Slc37a2'  | 0     | 0     | 0    | 0    | 0.63 | 0     | 0    | 0     | 0.01  | 3.18   |
| 56863 | 'Cldn9'    | 0     | 0     | 0.03 | 0    | 34.1 | 0     | 0    | 3.5   | 0     | 0      |
| 56868 | 'Psg23'    | 0.16  | 0.35  | 0.49 | 0.94 | 0.23 | 0.15  | 0.28 | 0.14  | 0.14  | 0.37   |
| 56869 | 'Zfp109'   | 0.51  | 7.76  | 0    | 4.79 | 0    | 0.49  | 0    | 0     | 0     | 0.02   |
| 56872 | 'Pate4'    | 0.72  | 0     | 0    | 0    | 0    | 0     | 0    | 0     | 0     | 0.13   |
| 56873 | 'Lmbr1'    | 10.3  | 13.7  | 29.5 | 4.67 | 18.2 | 18.26 | 22   | 19.37 | 17.5  | 15.86  |
| 56874 | 'Rnf32'    | 10.45 | 6     | 6.07 | 22.1 | 9.37 | 13.68 | 23.8 | 10.44 | 6.39  | 7.52   |
| 56876 | 'Nsmf'     | 12.85 | 8.57  | 18.8 | 5.33 | 11.1 | 5.27  | 17.8 | 12.11 | 12.47 | 9.13   |
| 56878 | 'Rbms1'    | 0     | 3.28  | 0.74 | 10.3 | 15.7 | 6.73  | 13.6 | 0.41  | 10.03 | 7.18   |
| 57014 | 'Htr3b'    | 0     | 1.17  | 0    | 0    | 0    | 0     | 0    | 0     | 0     | 0      |
| 57028 | 'Pdxp'     | 88.33 | 77.93 | 47.5 | 172  | 96.4 | 154.4 | 94.2 | 51.94 | 57.7  | 65.31  |
| 57080 | 'Gtf2ird1' | 8.18  | 3.89  | 6.56 | 6.98 | 7.87 | 7.55  | 1.43 | 6.4   | 13.94 | 12.75  |
| 57138 | 'Slc12a5'  | 34.94 | 14.21 | 38.7 | 11   | 24.4 | 17.18 | 36.9 | 22.38 | 22.89 | 8.77   |
| 57170 | 'Dolpp1'   | 22.67 | 21.47 | 13   | 29.6 | 10.7 | 20.87 | 11.9 | 26.1  | 24.51 | 15.8   |
| 57230 | 'Sap30bp'  | 27.66 | 43.6  | 25.6 | 17.9 | 23.6 | 35.14 | 33.3 | 26.45 | 33.02 | 31.77  |
| 57246 | 'Tbx20'    | 0     | 0     | 0    | 0.01 | 0    | 0     | 0    | 0     | 0     | 0      |
| 57247 | 'Zfp276'   | 5.6   | 5.64  | 2.04 | 0    | 9.3  | 6.51  | 0    | 1.97  | 0     | 2.86   |
| 57249 | 'Gabrq'    | 31.64 | 16.21 | 20.8 | 15   | 9.21 | 8.01  | 2.41 | 19.73 | 18.78 | 25.64  |
| 57253 | 'Tas2r108' | 0     | 0     | 0    | 0    | 0    | 0     | 0    | 0     | 3.28  | 0      |
| 57257 | 'Vav3'     | 0     | 0.2   | 0    | 0.03 | 0.76 | 1.43  | 0.04 | 0     | 3.28  | 0.01   |
| 57258 | 'Xpo4'     | 2.04  | 1.05  | 0.66 | 0.78 | 2.56 | 3.24  | 3.87 | 0.43  | 0.52  | 1.29   |
| 57259 | 'Tob2'     | 1.62  | 3.28  | 2.22 | 8.07 | 4.23 | 1.68  | 2.85 | 4.38  | 1.86  | 6.9    |
| 57260 | 'Ltb4r2'   | 0.01  | 0.01  | 0.03 | 0.03 | 0.1  | 1.39  | 0.2  | 1.24  | 0.18  | 0.15   |
| 57261 | 'Brd4'     | 12.74 | 11.02 | 12.5 | 26.9 | 22.1 | 21.24 | 11.6 | 14.1  | 16.45 | 18.02  |
| 57264 | 'Retn'     | 0     | 0     | 0    | 0    | 0    | 0.09  | 0    | 1.89  | 1.3   | 1.45   |
| 57265 | 'Fzd2'     | 0     | 1.87  | 0.31 | 0    | 0    | 0.9   | 0    | 0.8   | 0.36  | 0      |
| 57266 | 'Cxcl14'   | 15.85 | 7.6   | 6.93 | 23.4 | 87   | 11.26 | 18.5 | 5.97  | 0.67  | 12.47  |
| 57267 | 'Apba3'    | 16.65 | 23.45 | 25.6 | 7.06 | 13   | 15.96 | 28.2 | 5.46  | 0.16  | 11.1   |
| 57274 | 'Slc16a8'  | 0     | 0     | 1.08 | 0    | 0    | 1.94  | 0.41 | 0     | 0     | 0      |
| 57275 | 'Lenep'    | 2.92  | 6.39  | 12.8 | 0    | 12.6 | 5.41  | 2.49 | 10.02 | 7.72  | 10.62  |
| 57276 | 'Vsig2'    | 0     | 0     | 0    | 0    | 0.22 | 0     | 0    | 0     | 0     | 0.04   |
| 57278 | 'Bcam'     | 19.42 | 1.79  | 16.5 | 14.9 | 2.32 | 0.32  | 2.67 | 16.31 | 31.28 | 7.52   |
| 57279 | 'Slc25a20' | 22.12 | 22.76 | 4.18 | 6.98 | 20.7 | 39.37 | 4.88 | 14.38 | 1.26  | 5.77   |
| 57294 | 'Rps27'    | 466.7 | 536.2 | 631  | 1059 | 272  | 507.8 | 374  | 143.8 | 388.3 | 295.52 |
| 57295 | 'Icmt'     | 7.16  | 4.99  | 10.6 | 1.93 | 5.72 | 0.1   | 1.54 | 4.5   | 14.68 | 8.37   |
| 57296 | 'Psmc8'    | 158.3 | 138.9 | 120  | 186  | 131  | 154.4 | 123  | 167.9 | 116.3 | 139.8  |
| 57312 | 'Mrps31'   | 32.48 | 25.7  | 24.4 | 20   | 18.3 | 23.33 | 21.5 | 43.22 | 25.47 | 31.11  |
| 57314 | 'Nelfcd'   | 58.67 | 39.64 | 42.3 | 45   | 54.1 | 25.78 | 29.8 | 78.36 | 69.22 | 40.32  |
| 57315 | 'Wdr46'    | 16.1  | 6.12  | 6.26 | 8.76 | 10.6 | 27.12 | 14.4 | 11.36 | 10.34 | 14.05  |
| 57316 | 'C1d'      | 140.7 | 102.6 | 108  | 191  | 111  | 157.7 | 129  | 113.8 | 110.5 | 158.42 |
| 57317 | 'Srsf4'    | 30.33 | 22.2  | 33.1 | 22.2 | 21.8 | 29.36 | 31.5 | 12.79 | 16.26 | 12.65  |
| 57319 | 'Smpdl3a'  | 14.2  | 4.83  | 7.7  | 26.3 | 0.14 | 24.77 | 0    | 7.11  | 9.2   | 10.34  |
| 57320 | 'Park7'    | 403.4 | 319   | 331  | 414  | 417  | 582.4 | 432  | 482.2 | 302.6 | 424.59 |
| 57321 | 'Terf2ip'  | 41    | 52.95 | 46   | 46.3 | 39.3 | 70.05 | 70.9 | 45.97 | 45.96 | 52.31  |
| 57329 | 'Otor'     | 0     | 0     | 0.77 | 0    | 0    | 0     | 0    | 0     | 0     | 0      |
| 57330 | 'Gigyf1'   | 1.77  | 3.28  | 5.02 | 2.65 | 6.98 | 5.96  | 2.2  | 1.1   | 7.79  | 3.5    |
| 57339 | 'Jph1'     | 0.13  | 0.64  | 0.25 | 0.09 | 0.22 | 0.23  | 0.05 | 0.2   | 0.05  | 0.2    |
| 57340 | 'Jph3'     | 79.56 | 76.15 | 90.4 | 12.8 | 67.7 | 79.07 | 60.2 | 97.22 | 64.76 | 75.59  |
| 57342 | 'Parva'    | 4.45  | 12.26 | 17.3 | 1.84 | 7.93 | 0.33  | 0.02 | 2.99  | 3     | 9.89   |

|        |             |       |       |      |      |      |       |      |       |       |        |
|--------|-------------|-------|-------|------|------|------|-------|------|-------|-------|--------|
| 57344  | 'As3mt'     | 85.54 | 55.1  | 31.7 | 59.2 | 45.9 | 56.91 | 6.62 | 39.8  | 80.1  | 55.76  |
| 57354  | 'Cramp1l'   | 0.7   | 0.26  | 0.37 | 5.53 | 1.4  | 0.21  | 1.97 | 1.42  | 0.98  | 0.2    |
| 57355  | 'BC051019'  | 3.01  | 0.06  | 0    | 0.2  | 0.12 | 0     | 0.12 | 0.05  | 0     | 0.13   |
| 57357  | 'Srd5a3'    | 5.8   | 15.57 | 23.6 | 14.3 | 8.82 | 27.15 | 24.2 | 16.51 | 5.34  | 24.44  |
| 57370  | 'B4galt3'   | 40.46 | 53.03 | 39.7 | 24.1 | 43.7 | 30.39 | 25   | 32.51 | 56    | 53.98  |
| 57373  | 'Akip1'     | 0     | 0     | 0.08 | 44.8 | 5.19 | 33.75 | 0    | 9.57  | 13.84 | 7.53   |
| 57376  | 'Smarce1'   | 19.97 | 14.26 | 15.7 | 24.1 | 13.5 | 19.94 | 12.2 | 16.29 | 13.8  | 18.73  |
| 57377  | 'Mogs'      | 0.32  | 4.6   | 4.94 | 0.05 | 1.61 | 0.02  | 0.77 | 1.18  | 3.58  | 3.35   |
| 57385  | 'P2ry4'     | 0.01  | 0.03  | 0.02 | 0.04 | 0.04 | 0     | 0.03 | 0     | 0     | 0.01   |
| 57423  | 'Atp5j2'    | 642.2 | 480.8 | 553  | 508  | 507  | 812.5 | 603  | 430.4 | 643.2 | 466.86 |
| 57431  | 'Dnajc4'    | 9.39  | 18.62 | 35.2 | 9.82 | 19.1 | 24.46 | 32.5 | 26.74 | 33.85 | 28.21  |
| 57432  | 'Zc3h8'     | 9.1   | 6.29  | 6.97 | 2.3  | 12.1 | 4.42  | 3.55 | 3.27  | 3.48  | 8.39   |
| 57434  | 'Xrcc2'     | 2.19  | 2.45  | 6.44 | 0.04 | 4.39 | 7.47  | 5.36 | 1.02  | 0.09  | 3.84   |
| 57435  | 'Plin4'     | 0.01  | 1.4   | 0.02 | 0.01 | 0    | 0.01  | 0.01 | 0     | 0.01  | 0.29   |
| 57436  | 'Gabarapl1' | 519.8 | 471.2 | 671  | 471  | 567  | 629.6 | 571  | 623.3 | 473.2 | 436.71 |
| 57437  | 'Golga7'    | 59.33 | 43.21 | 45.9 | 68.4 | 94.1 | 96.8  | 60.5 | 58.09 | 50.85 | 48.25  |
| 57438  | 'March7'    | 15.94 | 17.82 | 15.5 | 33.6 | 6.58 | 2.48  | 10.6 | 10.72 | 9.84  | 21.34  |
| 57439  | 'Tmem183a'  | 27.46 | 23    | 24.8 | 15.9 | 16.4 | 19.24 | 25.8 | 24.94 | 32.95 | 12.94  |
| 57440  | 'Ehd3'      | 23.06 | 15.95 | 45.6 | 4.11 | 25.4 | 24.45 | 48   | 36.89 | 19.15 | 25.47  |
| 574402 | 'Gpr17'     | 0     | 0     | 21.5 | 4.44 | 0    | 0.01  | 24   | 0.54  | 0     | 0      |
| 574403 | 'Fam196b'   | 0.57  | 0.14  | 2.27 | 0    | 0    | 3.05  | 0.01 | 2.27  | 0     | 2.57   |
| 574404 | 'Gm14685'   | 0     | 14.71 | 0    | 9.54 | 3.78 | 0     | 0    | 2.8   | 4.33  | 5.27   |
| 574405 | 'DXBay18'   | 0     | 4.46  | 2.94 | 0    | 0    | 11.82 | 0.13 | 7.1   | 0.32  | 8.98   |
| 57441  | 'Gmnn'      | 0.72  | 3.77  | 14.3 | 8.34 | 8.15 | 0     | 0.05 | 7.08  | 0.14  | 2.73   |
| 574417 | 'Tas2r137'  | 0     | 0     | 0    | 0    | 0    | 0     | 0    | 0     | 0.04  | 0      |
| 574418 | 'Serinc4'   | 0.03  | 0     | 0.1  | 0    | 0    | 0     | 0    | 0.17  | 0     | 0      |
| 574428 | 'Zmynd15'   | 0     | 0.45  | 0    | 0    | 0    | 0     | 0    | 0.03  | 0.02  | 0      |
| 57443  | 'Fbxo3'     | 83.78 | 72.36 | 58.2 | 55.9 | 53.4 | 70.22 | 62.7 | 69.08 | 75.41 | 90.96  |
| 574437 | 'Xlr3b'     | 16.43 | 36.34 | 18.6 | 0.04 | 0.09 | 22.12 | 36   | 14.11 | 30.5  | 16.35  |
| 57444  | 'lsg20'     | 0     | 0     | 0    | 0.07 | 0    | 0     | 0    | 5.38  | 0     | 0      |
| 57738  | 'Slc15a2'   | 2.85  | 0.54  | 5.62 | 0.98 | 3.78 | 0     | 16.2 | 0     | 0     | 0      |
| 57740  | 'Stk32c'    | 3.59  | 13.22 | 0.15 | 0.03 | 2.55 | 0.15  | 1.68 | 2.22  | 4.07  | 0      |
| 57741  | 'Noc2l'     | 3.88  | 3.18  | 4.61 | 0    | 2.05 | 4.56  | 5.42 | 7.21  | 8.66  | 5.08   |
| 57743  | 'Sec61a2'   | 73.68 | 66.26 | 73.5 | 71.9 | 55   | 71.76 | 53.4 | 71.38 | 95.41 | 86.83  |
| 57745  | 'Zfp112'    | 0     | 6.35  | 6.9  | 0    | 2.33 | 0     | 3.46 | 5.64  | 0.26  | 5.71   |
| 57746  | 'Piiw12'    | 0     | 0     | 0.02 | 0    | 0    | 0     | 0    | 0     | 0     | 0.01   |
| 57748  | 'Jmy'       | 1.65  | 0.55  | 0.37 | 0.52 | 1.9  | 0.01  | 0.31 | 0.29  | 1.25  | 0.76   |
| 57750  | 'Wdr12'     | 41.21 | 37.43 | 52.6 | 55   | 35.1 | 36.64 | 65.4 | 47.79 | 54.66 | 34.34  |
| 57751  | 'Rnf25'     | 82.83 | 44.76 | 32.6 | 53.1 | 85.4 | 74.85 | 54.4 | 66.67 | 52.67 | 55.06  |
| 57752  | 'Tacc2'     | 15.62 | 13.47 | 13.4 | 8.63 | 11.5 | 11.07 | 23.8 | 15.89 | 12.09 | 6.33   |
| 57753  | 'Noc3l'     | 1.66  | 0.06  | 2.13 | 0.03 | 1.51 | 1.19  | 0.28 | 0.45  | 0.16  | 1.1    |
| 57754  | 'Cend1'     | 275.7 | 190   | 402  | 218  | 301  | 281.2 | 378  | 399.8 | 302.8 | 206.38 |
| 57755  | 'Dnajb7'    | 0     | 0     | 0    | 0    | 2.89 | 0     | 1.86 | 0     | 2.86  | 0      |
| 57756  | 'Fhl5'      | 0     | 0     | 0.05 | 0    | 0    | 0     | 0    | 0     | 0     | 0      |
| 57757  | 'Pglyrp2'   | 0     | 0     | 0    | 0    | 1.63 | 0     | 0    | 0.15  | 0     | 0      |
| 57773  | 'Wdr4'      | 4.51  | 5.8   | 7.68 | 9.47 | 8.56 | 12.33 | 2.55 | 3.82  | 7.06  | 18.29  |
| 57775  | 'Usp29'     | 12.78 | 11.83 | 14.7 | 9.84 | 4.96 | 11.73 | 10.4 | 12.86 | 8.18  | 11.28  |
| 57776  | 'Ttyh1'     | 20.95 | 12.67 | 14   | 3.18 | 22.9 | 13.82 | 32.9 | 13.13 | 10.39 | 3.39   |
| 57778  | 'Fmnl1'     | 1.39  | 3.23  | 0.99 | 0    | 3.19 | 0.06  | 1.72 | 2.4   | 1.97  | 0.48   |
| 57780  | 'Fxyd7'     | 340.1 | 175.1 | 194  | 205  | 192  | 321.5 | 165  | 307.3 | 106.1 | 103.01 |
| 57782  | 'Rbak'      | 1.98  | 2.14  | 5.24 | 13.1 | 6.54 | 0.5   | 0.13 | 1.92  | 1.45  | 1.75   |
| 57783  | 'Tnip1'     | 8.6   | 7.81  | 10.7 | 0.02 | 13.1 | 8.44  | 3.64 | 12.45 | 4.22  | 7.07   |
| 57784  | 'Bin3'      | 0     | 6.52  | 6.07 | 10.8 | 5.52 | 18.81 | 9.51 | 7.96  | 6.67  | 13.76  |
| 57785  | 'Rangrf'    | 22.39 | 5.7   | 21.5 | 13.8 | 21.4 | 18.18 | 20.8 | 10.67 | 18.43 | 6.87   |
| 57808  | 'Rpl35a'    | 252.6 | 286.3 | 239  | 357  | 199  | 270.9 | 286  | 144.7 | 168.3 | 169.41 |
| 57810  | 'Cdon'      | 0.13  | 0     | 0.61 | 0    | 0.02 | 1.03  | 0.1  | 0.11  | 0     | 2.13   |
| 57813  | 'Tk2'       | 48.14 | 20.31 | 43.5 | 63.5 | 50.1 | 33.04 | 51.8 | 47.89 | 69.07 | 20.41  |
| 57815  | 'Spata5'    | 5.77  | 4.85  | 8.25 | 0.02 | 2.56 | 4.66  | 0.6  | 5.9   | 15.19 | 12.57  |

|       |                 |       |       |      |      |      |       |      |       |       |         |
|-------|-----------------|-------|-------|------|------|------|-------|------|-------|-------|---------|
| 57816 | 'Tesc'          | 6.22  | 13.87 | 8.74 | 12.3 | 3.31 | 0.05  | 6.95 | 7.15  | 17.71 | 3.17    |
| 57837 | 'Eral1'         | 11.67 | 9.24  | 21.6 | 5.81 | 24.3 | 4.4   | 6.07 | 12.24 | 5.1   | 16.29   |
| 57869 | 'Adck2'         | 7.8   | 13.79 | 18.3 | 15.9 | 0.34 | 10.58 | 6.38 | 26.1  | 19.57 | 15.44   |
| 57874 | 'Hacd3'         | 149.2 | 120.1 | 139  | 62.1 | 109  | 166.2 | 137  | 145.7 | 207.4 | 184.8   |
| 57875 | 'Angptl4'       | 0.02  | 10.84 | 0.03 | 0    | 0    | 6.04  | 0.03 | 0     | 3.75  | 2.2     |
| 57890 | 'Il17re'        | 0.51  | 0.73  | 0.43 | 0    | 1.13 | 0     | 2.3  | 0.58  | 0     | 0       |
| 57895 | 'Ccdc126'       | 8.61  | 10.56 | 17.6 | 5.47 | 9.53 | 9.07  | 13.2 | 6.51  | 20.71 | 7.93    |
| 57896 | 'Krccl1'        | 1.58  | 2.53  | 0.97 | 5.96 | 5.12 | 0     | 4.9  | 2.71  | 2.93  | 5.34    |
| 57905 | 'Isy1'          | 12.47 | 15.98 | 26.2 | 10.7 | 7.45 | 31.47 | 32.2 | 22.52 | 30.31 | 23.79   |
| 57908 | 'Zfp318'        | 2.71  | 1.23  | 3.5  | 4    | 5.19 | 1.5   | 1.09 | 2.21  | 2.46  | 1.86    |
| 57911 | 'Gsdma'         | 0     | 0     | 0    | 0    | 0    | 0.17  | 0    | 0     | 0     | 0       |
| 57912 | 'Cdc42se1'      | 17.74 | 6.71  | 18.3 | 19.8 | 19.1 | 9.48  | 11.1 | 6.08  | 14.26 | 15.55   |
| 57913 | 'Pidd1'         | 0.04  | 1.43  | 3.85 | 0    | 0.02 | 0     | 0.07 | 2.92  | 0.03  | 0.01    |
| 57914 | 'Crlf2'         | 5.48  | 8.98  | 6.59 | 6.49 | 6.22 | 21.41 | 0.61 | 4.32  | 5.48  | 13.86   |
| 57915 | 'Tbc1d1'        | 4.43  | 3.39  | 5.34 | 10.8 | 2.43 | 7.75  | 4.67 | 1.64  | 1.32  | 8.15    |
| 57916 | 'Tnfrsf13b'     | 2.74  | 1.36  | 0.26 | 4.7  | 0.14 | 0     | 0    | 0     | 0     | 0.42    |
| 58172 | 'Sertad2'       | 3.41  | 1.95  | 4.89 | 2.99 | 1.02 | 3.57  | 3.83 | 2.23  | 4.03  | 0.94    |
| 58175 | 'Rgs20'         | 23.32 | 11.66 | 12.1 | 24.8 | 27.4 | 21.17 | 15   | 26.67 | 7.31  | 13.46   |
| 58178 | 'Sorcs1'        | 6.98  | 4.5   | 3.61 | 0.11 | 8    | 1.51  | 5.11 | 5     | 7.8   | 12.11   |
| 58180 | 'Hic2'          | 0.01  | 0.85  | 2.33 | 2.56 | 1.45 | 0     | 1.6  | 1.65  | 0.51  | 1.24    |
| 58182 | 'Prokr1'        | 0     | 0.18  | 0.8  | 0    | 0    | 0     | 0    | 0     | 0     | 0       |
| 58184 | 'Cnot9'         | 18.41 | 17.55 | 22   | 16.6 | 18.9 | 8.35  | 15.6 | 19.3  | 9.98  | 14.37   |
| 58185 | 'Rsad2'         | 0     | 1.88  | 1.97 | 0.62 | 3.44 | 0     | 0    | 0     | 0     | 0.01    |
| 58186 | 'Rad18'         | 6.11  | 5.24  | 6.17 | 6.04 | 9.72 | 8.08  | 6.99 | 11.2  | 1.8   | 0.02    |
| 58187 | 'Cldn10'        | 36.73 | 46.51 | 22.9 | 68.8 | 10.2 | 49.79 | 12.3 | 24.21 | 24.89 | 4.75    |
| 58188 | 'Vstm2b'        | 15.47 | 7.3   | 21.2 | 29.7 | 13.1 | 22.96 | 14.9 | 14.85 | 13.84 | 10.42   |
| 58193 | 'Extl2'         | 39.64 | 39.75 | 67.6 | 64.6 | 49.4 | 37.46 | 31.1 | 60.74 | 65.26 | 56.02   |
| 58194 | 'Sh3kbp1'       | 9.69  | 16.12 | 12.7 | 11.4 | 6.56 | 8.19  | 15   | 11.21 | 12.54 | 10.43   |
| 58198 | 'Sall1'         | 0.92  | 0     | 1.53 | 1.43 | 0    | 0.27  | 0    | 0     | 0     | 0.3     |
| 58200 | 'Ppp1r1a'       | 21.86 | 23.01 | 22.4 | 24.9 | 30.2 | 32.46 | 35.3 | 24.75 | 20.98 | 11.34   |
| 58202 | 'Nelfb'         | 31.59 | 46.79 | 67   | 17.5 | 50.4 | 46.16 | 58.4 | 69.31 | 42.17 | 32.16   |
| 58203 | 'Zbp1'          | 0     | 0     | 0    | 0    | 0    | 14.57 | 0    | 0     | 0     | 0       |
| 58206 | 'Zbtb32'        | 0     | 2.28  | 0    | 0    | 0    | 0     | 0    | 0     | 0     | 2.63    |
| 58207 | 'Slc43a3'       | 0     | 0     | 0.02 | 0    | 0    | 0     | 0    | 0     | 0     | 0.02    |
| 58208 | 'Bcl11b'        | 0     | 0     | 0    | 0    | 1.67 | 0.12  | 1.01 | 0.28  | 0     | 0       |
| 58212 | 'Srrm3'         | 10.98 | 25.93 | 24   | 25.6 | 39.8 | 41.9  | 31.4 | 10.41 | 22.23 | 16.48   |
| 58218 | 'Trem3'         | 0     | 0     | 1.05 | 0    | 0    | 0     | 0    | 0     | 0     | 0       |
| 58220 | 'Pard6b'        | 0     | 0     | 1.92 | 0    | 0    | 0.01  | 0    | 0     | 1.64  | 0       |
| 58222 | 'Rab37'         | 0     | 2.62  | 1.45 | 0    | 0.35 | 0     | 0    | 0     | 0     | 0.41    |
| 58223 | 'Mmp19'         | 0     | 0     | 0.84 | 0    | 0.02 | 0     | 0.09 | 0.64  | 0     | 0       |
| 58226 | 'Cacna1h'       | 0.96  | 1.96  | 1.65 | 5.63 | 2.29 | 0.65  | 1.01 | 2.17  | 0.03  | 0.23    |
| 58227 | 'Fam184b'       | 4.14  | 3.04  | 3.5  | 1.59 | 1.78 | 2.24  | 0    | 0.55  | 1.26  | 3.91    |
| 58229 | 'Efcc1'         | 5.44  | 13.43 | 12.3 | 9.45 | 21.7 | 10.94 | 21.1 | 15.99 | 7.38  | 7.17    |
| 58230 | 'Rnf8'          | 42.18 | 37.67 | 45.1 | 51.4 | 40.8 | 33.35 | 38.3 | 37.16 | 43.55 | 20.24   |
| 58231 | 'Stk4'          | 5.68  | 3.17  | 5.38 | 2.09 | 4.97 | 12.84 | 8.69 | 7.65  | 1.53  | 20.05   |
| 58233 | 'Dnaja4'        | 4.79  | 5.94  | 0.94 | 9.44 | 6.83 | 5.08  | 5.91 | 3.51  | 16.65 | 6.85    |
| 58234 | 'Shank3'        | 0.71  | 1.38  | 0.84 | 1.36 | 0.1  | 0.62  | 0.04 | 1.21  | 1.01  | 0.25    |
| 58235 | 'Nectin1'       | 1.44  | 1.84  | 3.31 | 0.95 | 0.52 | 2.15  | 4.59 | 0.65  | 0.73  | 1.15    |
| 58237 | 'Nkain4'        | 62.4  | 32    | 44.4 | 76.8 | 24.6 | 101.4 | 28.9 | 19.05 | 48.48 | 9.92    |
| 58238 | 'Fam181b'       | 5.62  | 1.54  | 7.5  | 2.17 | 0    | 0     | 0    | 1.55  | 0     | 0       |
| 58239 | 'Dexi'          | 5.92  | 6.5   | 5.03 | 10.1 | 9.2  | 0.33  | 14   | 8.23  | 8.76  | 2.53    |
| 58240 | 'Hs1bp3'        | 4.47  | 6.21  | 10.7 | 8.2  | 6.27 | 4.49  | 6.38 | 3.33  | 0.11  | 5.7     |
| 58242 | 'Nudt11'        | 35.04 | 24.88 | 29.5 | 27.1 | 7.8  | 9.89  | 20.8 | 8.8   | 20.15 | 3.43    |
| 58243 | 'Nap1l5'        | 1998  | 2303  | 1677 | 1968 | 1445 | 2103  | 2067 | 2485  | 2008  | 1841.75 |
| 58244 | 'Stx6'          | 13.66 | 24.74 | 22.2 | 10.8 | 23.4 | 13.66 | 20.7 | 13.31 | 15.92 | 0.09    |
| 58245 | 'Gpr180'        | 21.79 | 16.55 | 26.3 | 22.5 | 7.59 | 7.15  | 21.9 | 14.05 | 34.94 | 9.48    |
| 58246 | 'Slc35b4'       | 33.13 | 23.25 | 26.1 | 19.1 | 18.5 | 19.63 | 13.2 | 34.17 | 17.44 | 33.92   |
| 58248 | '1700123O20Rik' | 30.19 | 24.8  | 16.6 | 6.38 | 20.7 | 21.93 | 35   | 12.3  | 15.1  | 15.22   |

|       |            |       |       |      |      |      |       |      |       |       |        |
|-------|------------|-------|-------|------|------|------|-------|------|-------|-------|--------|
| 58249 | 'Fibp'     | 78.88 | 83.73 | 58.5 | 75.9 | 94.6 | 118   | 77.9 | 78.8  | 50.93 | 108.55 |
| 58250 | 'Chst11'   | 0.67  | 2.38  | 1.64 | 2.37 | 1.36 | 0     | 1.12 | 2.91  | 0.21  | 0      |
| 58251 | 'Cep295n1' | 0.09  | 0.98  | 0.22 | 1.29 | 0    | 0.32  | 0    | 0.09  | 0.17  | 0.35   |
| 58520 | 'Erg28'    | 44.03 | 46.52 | 51.8 | 14.9 | 53.8 | 47.62 | 53.9 | 56.34 | 34.66 | 26.79  |
| 58521 | 'Eid1'     | 17.76 | 17    | 8.25 | 14.3 | 10.8 | 26.54 | 16.8 | 19.09 | 20.32 | 17.93  |
| 58522 | 'Trim54'   | 0.03  | 0.03  | 0.1  | 0.04 | 0.1  | 0.09  | 0.07 | 0     | 0     | 0.08   |
| 58523 | 'Elp2'     | 70.92 | 56.7  | 82.7 | 65.6 | 47.3 | 70.15 | 79.9 | 65.27 | 98.5  | 102.91 |
| 58799 | 'Crbn'     | 48.04 | 29.68 | 11.5 | 31.6 | 50.9 | 20.32 | 22.2 | 33.84 | 37.72 | 30.16  |
| 58800 | 'Trpm7'    | 6.62  | 3.84  | 6.03 | 4.78 | 3.67 | 0.41  | 5.69 | 5.45  | 3.73  | 7.09   |
| 58801 | 'Pmaip1'   | 11.09 | 0     | 29.1 | 0    | 0    | 23.69 | 0    | 0     | 12.68 | 0      |
| 58802 | 'Kcnmb4'   | 0     | 7.62  | 1.17 | 17.3 | 0.17 | 0     | 0    | 0.19  | 0.04  | 4.42   |
| 58804 | 'Cdc42ep5' | 0     | 0     | 3.14 | 0    | 0    | 0     | 7.5  | 0     | 0     | 0      |
| 58805 | 'Mlxip1'   | 0.42  | 0.02  | 0.1  | 0    | 0    | 2.02  | 0    | 0     | 0     | 0.02   |
| 58807 | 'Slco1c1'  | 1.31  | 0.2   | 0    | 0    | 0    | 0.05  | 0    | 3     | 1.68  | 0.05   |
| 58809 | 'Rnase4'   | 3.67  | 3.45  | 2.65 | 0    | 0    | 14.32 | 0.07 | 0     | 0.6   | 9.97   |
| 58810 | 'Akr1a1'   | 519.6 | 554.6 | 537  | 414  | 522  | 678.4 | 579  | 556.5 | 444.7 | 519.45 |
| 58859 | 'Efemp2'   | 12.74 | 2.73  | 5.35 | 3.3  | 5.45 | 6.47  | 6.59 | 8.23  | 7.75  | 3.62   |
| 58861 | 'Cysltr1'  | 1.92  | 0     | 0    | 0    | 0    | 2.12  | 0    | 0     | 0     | 0      |
| 58864 | 'Tssk3'    | 0     | 0     | 0    | 0    | 0.44 | 0     | 0.75 | 0     | 0     | 0      |
| 58865 | 'Tdh'      | 0     | 0     | 0    | 0    | 0    | 0     | 0    | 0     | 0     | 0.68   |
| 58866 | 'Treh'     | 0.49  | 0     | 0    | 0    | 0    | 0     | 1.11 | 0     | 0     | 0      |
| 58867 | 'Syngr4'   | 0     | 0.26  | 0    | 0    | 0    | 0     | 0    | 0     | 0.04  | 0      |
| 58869 | 'Pex5l'    | 10.08 | 7.07  | 0.62 | 3    | 11.2 | 10.26 | 9.02 | 2.42  | 0.88  | 2.45   |
| 58875 | 'Hibadh'   | 61.88 | 68.97 | 55.3 | 99   | 34.6 | 42.92 | 38.1 | 42.88 | 59.55 | 51.76  |
| 58887 | 'Repin1'   | 16.11 | 24.27 | 23.8 | 6.03 | 20.6 | 13.52 | 26.4 | 13.73 | 20    | 13.66  |
| 58909 | 'Fam13a'   | 6.37  | 4.65  | 4.07 | 13.4 | 7.05 | 3.47  | 8.12 | 6.27  | 8.82  | 2.84   |
| 58911 | 'Sumf1'    | 9.17  | 8.15  | 4.96 | 16.1 | 9.04 | 3.99  | 11.1 | 6.6   | 13.73 | 12.84  |
| 58916 | 'Myot'     | 0.02  | 2.17  | 0    | 0    | 0    | 0.04  | 0.02 | 0     | 0     | 0.02   |
| 58988 | 'Rps6kb2'  | 12.49 | 13.58 | 13.3 | 9.97 | 37.6 | 24.47 | 22.9 | 9.15  | 10.93 | 26.07  |
| 58991 | 'Ghrl'     | 0     | 0     | 0    | 0.84 | 0    | 0     | 0    | 0     | 0     | 0      |
| 58992 | 'F12'      | 0     | 0     | 0    | 4.17 | 1.15 | 1.76  | 0    | 2.55  | 3.79  | 0.06   |
| 58994 | 'Smpd3'    | 8.32  | 4.83  | 8.88 | 1.7  | 7.02 | 1.07  | 0.04 | 3.73  | 3.15  | 4.89   |
| 58996 | 'Arhgap23' | 4.06  | 2.95  | 2.41 | 2.67 | 4.01 | 3.25  | 4.77 | 2.91  | 6.79  | 1.37   |
| 58998 | 'Nectin3'  | 2.91  | 0.76  | 0.17 | 2.26 | 2.23 | 0.02  | 5.54 | 0.89  | 0.03  | 1.45   |
| 59001 | 'Pole3'    | 7.13  | 14.1  | 15.1 | 26.2 | 17.9 | 12.26 | 15.6 | 9.74  | 11.81 | 11.47  |
| 59002 | 'Wrap73'   | 5.46  | 15.16 | 29.7 | 11.5 | 13.6 | 26.58 | 12.8 | 25.01 | 29.49 | 17.29  |
| 59003 | 'Maea'     | 86.17 | 59.31 | 109  | 71.5 | 85.6 | 38.74 | 74.6 | 92.46 | 79.38 | 81.83  |
| 59004 | 'Pias4'    | 23.17 | 10.94 | 11.9 | 0    | 32.1 | 6.61  | 16.6 | 14.72 | 3.47  | 8.56   |
| 59005 | 'Trappc2l' | 352.1 | 306.6 | 325  | 248  | 291  | 536.5 | 289  | 312.2 | 356.7 | 300.62 |
| 59006 | 'Myoz2'    | 0.2   | 0     | 0.83 | 0.25 | 0.22 | 0.28  | 0.1  | 0.04  | 0.31  | 0.27   |
| 59007 | 'Ngly1'    | 12.95 | 15.17 | 19.2 | 15.1 | 14.6 | 13.22 | 10.1 | 10.21 | 21.07 | 19.45  |
| 59008 | 'Anapc5'   | 122   | 175.8 | 119  | 140  | 124  | 116   | 112  | 145.5 | 103.2 | 137.2  |
| 59009 | 'Sh3rf1'   | 3.61  | 3.47  | 3.16 | 0.42 | 0.26 | 0.08  | 1.74 | 4.27  | 6.59  | 0.29   |
| 59010 | 'Sqor'     | 8.97  | 0     | 5.15 | 0    | 0    | 9.96  | 6.79 | 0     | 13.09 | 0.03   |
| 59012 | 'Moxd1'    | 0.17  | 10.15 | 0.09 | 2.67 | 0.03 | 0     | 0    | 1.12  | 0.01  | 0      |
| 59013 | 'Hnrnph1'  | 117.8 | 129.8 | 166  | 129  | 115  | 97.58 | 160  | 111.1 | 82.02 | 85.83  |
| 59014 | 'Rrs1'     | 10.42 | 11.74 | 15.4 | 17.9 | 14.2 | 11.62 | 10.7 | 9.79  | 6.87  | 1.89   |
| 59015 | 'Nup160'   | 0.48  | 2.28  | 3.3  | 5.32 | 2.57 | 0.02  | 2.63 | 2.13  | 4.43  | 0.3    |
| 59016 | 'Thap11'   | 10.39 | 17.1  | 11.1 | 55   | 11.5 | 4.17  | 8.16 | 8.37  | 21.75 | 7.02   |
| 59020 | 'Pdzk1'    | 0     | 0     | 0    | 0    | 0    | 0     | 1.95 | 0     | 0     | 0.18   |
| 59021 | 'Rab2a'    | 64.09 | 96.95 | 61.6 | 70.5 | 73.1 | 63.09 | 99.1 | 129.3 | 104.7 | 64.06  |
| 59022 | 'Edf1'     | 422   | 300.9 | 343  | 408  | 350  | 462.5 | 447  | 383.8 | 397.1 | 410.54 |
| 59024 | 'Med12'    | 0.38  | 0.99  | 3.49 | 1.56 | 1.66 | 0.35  | 0.32 | 0.09  | 0.31  | 1.07   |
| 59025 | 'Usp14'    | 168.5 | 164.1 | 159  | 104  | 80.1 | 130.2 | 163  | 158.5 | 140.1 | 175.8  |
| 59026 | 'Huwe1'    | 5.91  | 6     | 7.83 | 8.43 | 3.61 | 8.24  | 8.33 | 4.26  | 6.42  | 3.84   |
| 59027 | 'Nampt'    | 12.84 | 10.06 | 10.4 | 7.84 | 14.6 | 2.38  | 8.58 | 5.48  | 14.48 | 12.4   |
| 59028 | 'Rcl1'     | 28.65 | 45.89 | 12.5 | 5.06 | 19.8 | 27.33 | 56.7 | 32.65 | 18.04 | 25.37  |
| 59029 | 'Psmc14'   | 181.7 | 211.1 | 191  | 198  | 177  | 274   | 160  | 181.5 | 215.7 | 282.9  |

|        |             |       |       |      |      |      |       |      |       |       |        |
|--------|-------------|-------|-------|------|------|------|-------|------|-------|-------|--------|
| 59030  | 'Mkks'      | 19.24 | 4.63  | 18.9 | 5.58 | 6.38 | 21.35 | 25.2 | 15.67 | 15.15 | 9.08   |
| 59031  | 'Chst12'    | 34.38 | 45.7  | 42.3 | 11.6 | 18.5 | 36.12 | 44.3 | 62.79 | 81.19 | 30.49  |
| 59032  | 'Ppp2r3c'   | 21.8  | 26.52 | 4.79 | 26.5 | 11.6 | 27.81 | 14   | 23.62 | 19.64 | 18.27  |
| 59033  | 'Slc4a8'    | 6.21  | 3.91  | 7.26 | 4.47 | 4.26 | 3.79  | 3.5  | 6.4   | 7.42  | 13.23  |
| 59035  | 'Carm1'     | 0.5   | 0     | 0    | 0    | 1.19 | 0.02  | 1.45 | 2.02  | 5.45  | 1.11   |
| 59036  | 'Dact1'     | 0.02  | 1.08  | 1.27 | 6.68 | 0.59 | 0     | 0    | 0     | 3.54  | 0      |
| 59038  | 'Pxmp4'     | 1.98  | 7.37  | 0.54 | 9.7  | 16.2 | 2.67  | 5.17 | 14.54 | 1.04  | 4.7    |
| 59040  | 'Rhot1'     | 25.99 | 17.24 | 16.2 | 5.02 | 12.5 | 12.84 | 24.4 | 13.51 | 16.07 | 6.68   |
| 59041  | 'Stk25'     | 181.7 | 218.5 | 238  | 171  | 230  | 331.4 | 275  | 285.1 | 255.9 | 242.44 |
| 59042  | 'Cope'      | 268.3 | 254.1 | 325  | 446  | 345  | 415.1 | 309  | 395.1 | 347.4 | 396.83 |
| 59043  | 'Wsb2'      | 22.29 | 18.86 | 5.61 | 33.5 | 33.6 | 21.98 | 10.9 | 14.28 | 11.08 | 26.31  |
| 59044  | 'Rnf130'    | 10.12 | 9.02  | 7.35 | 1.4  | 10.3 | 1.35  | 11.4 | 7.31  | 6.02  | 3.73   |
| 59045  | 'Stard3'    | 15.73 | 25.14 | 12.9 | 11.1 | 20.1 | 24.94 | 5.07 | 12.76 | 24.07 | 17.02  |
| 59046  | 'Arpp19'    | 52.39 | 41.54 | 27.5 | 38.8 | 35.2 | 57.74 | 44.4 | 49.51 | 33.78 | 40.82  |
| 59047  | 'Pnkp'      | 11.1  | 12.77 | 13.9 | 17.7 | 41.8 | 32.22 | 16.5 | 19.24 | 20.55 | 20.64  |
| 59048  | 'C1galt1c1' | 41.76 | 38.31 | 15.2 | 20.7 | 45.4 | 47.97 | 24   | 49.59 | 46.15 | 37.21  |
| 59049  | 'Slc22a17'  | 198   | 178.4 | 150  | 238  | 218  | 255.8 | 229  | 265.1 | 250.1 | 153.06 |
| 59050  | 'Nsa2'      | 11.18 | 7.92  | 7.64 | 9.85 | 6.02 | 7.81  | 17.7 | 12    | 4.35  | 10.21  |
| 59052  | 'Mettl9'    | 31.19 | 19.32 | 30.2 | 51.2 | 27.8 | 25.52 | 7.65 | 39.42 | 25.3  | 28.12  |
| 59053  | 'Hgh1'      | 20.83 | 9.46  | 15.5 | 2.04 | 6.87 | 20.18 | 16.9 | 16.98 | 23.85 | 8.42   |
| 59054  | 'Mrps30'    | 20.57 | 18.71 | 23.5 | 54.2 | 29.4 | 7.55  | 44   | 11.59 | 11.92 | 15.23  |
| 59056  | 'Evc'       | 0.02  | 1.81  | 0.05 | 2.08 | 0    | 0     | 0    | 0.23  | 2.35  | 0.06   |
| 59057  | 'Zfp24'     | 4.21  | 13.09 | 11   | 18.6 | 6.43 | 6.02  | 22.8 | 6.79  | 13.73 | 8.7    |
| 59058  | 'Bhlhe22'   | 0     | 0     | 0    | 0    | 0    | 2.12  | 0.25 | 0.42  | 1.59  | 0      |
| 59069  | 'Tpm3'      | 139.2 | 209.9 | 116  | 182  | 146  | 192.2 | 113  | 123.6 | 117.1 | 150.73 |
| 59079  | 'Erbin'     | 0.63  | 0.95  | 1.71 | 1.59 | 2.48 | 1.08  | 0.49 | 0.24  | 0.03  | 0.03   |
| 59083  | 'Fetub'     | 0     | 3.03  | 0    | 0    | 0    | 0     | 0    | 0     | 0     | 0      |
| 59090  | 'Midn'      | 0.6   | 1.36  | 1.99 | 4    | 0.23 | 0.66  | 1.91 | 1.08  | 1.62  | 0.45   |
| 59091  | 'Jph2'      | 0     | 0.72  | 2.67 | 3.48 | 0    | 0     | 0.65 | 2.3   | 0.02  | 0      |
| 59092  | 'Pcbp4'     | 65.61 | 44.18 | 54.9 | 30   | 55.1 | 49.94 | 38.7 | 54.96 | 50.47 | 41.42  |
| 59093  | 'Pcbp3'     | 41.97 | 74.98 | 79.4 | 64   | 32.4 | 40    | 56.5 | 60.69 | 47.07 | 54.18  |
| 59095  | 'Fxyd6'     | 295.2 | 246.4 | 433  | 298  | 269  | 488.8 | 466  | 382.5 | 442.6 | 358.39 |
| 59125  | 'Nek7'      | 2.49  | 4.56  | 4.17 | 20.5 | 8.37 | 1.87  | 0.02 | 0.47  | 2.92  | 2.23   |
| 59126  | 'Nek6'      | 15.56 | 37.01 | 18.4 | 18.4 | 12.7 | 29.35 | 33.5 | 23.06 | 12.77 | 39.16  |
| 59287  | 'Ncstn'     | 36.18 | 36.33 | 30.9 | 58.9 | 44.8 | 34.2  | 44.4 | 50.02 | 35.45 | 76.34  |
| 59288  | 'Dctn5'     | 146.1 | 122.4 | 101  | 113  | 109  | 151.1 | 142  | 159.7 | 164.2 | 141.51 |
| 59308  | 'Emcn'      | 0.03  | 0     | 0    | 0    | 0    | 0     | 0    | 0     | 0     | 0      |
| 594844 | 'Tceal3'    | 284.6 | 159.8 | 217  | 267  | 161  | 194.2 | 228  | 201.6 | 234.7 | 141.01 |
| 595136 | 'Ndufs5'    | 651.6 | 510.8 | 638  | 537  | 513  | 765   | 643  | 491.5 | 584.8 | 502.81 |
| 60315  | 'Myg1'      | 42.35 | 42.17 | 61.1 | 73.9 | 66.4 | 64.64 | 50.1 | 35.38 | 60.03 | 63.08  |
| 60321  | 'Wbp11'     | 24.49 | 18.66 | 34.9 | 25.2 | 37   | 14.62 | 31.7 | 29.19 | 43.88 | 44.83  |
| 60322  | 'Chst7'     | 1.74  | 0     | 7.36 | 0    | 0    | 0     | 8.95 | 0     | 0.86  | 2.01   |
| 60344  | 'Fign'      | 0     | 0.3   | 0    | 1    | 0    | 0     | 2.08 | 0     | 0     | 0      |
| 60345  | 'Nrip2'     | 47.28 | 77.21 | 63.7 | 44   | 89.2 | 24.23 | 64.7 | 76.18 | 49.99 | 34.65  |
| 60363  | 'Cldn15'    | 0     | 0     | 2.45 | 0.87 | 0    | 0     | 0    | 0     | 0     | 0      |
| 60364  | 'Donson'    | 5.23  | 1.46  | 4.84 | 1.75 | 4.38 | 0.17  | 2.58 | 0.73  | 1.46  | 0.18   |
| 60365  | 'Rbm8a'     | 53.06 | 52.8  | 52.3 | 76.3 | 58.3 | 62.17 | 30.7 | 58.82 | 29.78 | 57.7   |
| 60367  | 'Il1rapl2'  | 1.45  | 0     | 3.9  | 7.16 | 0    | 0     | 0.43 | 0     | 0     | 2.38   |
| 60406  | 'Sap30'     | 0.92  | 2.5   | 0    | 5.89 | 6.05 | 0.28  | 0    | 2.3   | 0.07  | 0      |
| 60409  | 'Trappc4'   | 238.4 | 183.4 | 152  | 252  | 191  | 218.1 | 215  | 245.6 | 246.7 | 248.79 |
| 60411  | 'Cenpk'     | 0     | 0     | 0.06 | 0    | 7.82 | 0.2   | 0.12 | 0     | 0.04  | 0.04   |
| 60425  | 'Doc2g'     | 5.36  | 4.47  | 4.85 | 0.17 | 20.5 | 3.61  | 5.53 | 2.36  | 4     | 4.81   |
| 60440  | 'Iigp1'     | 0.02  | 0     | 0.07 | 3.9  | 0    | 0     | 0    | 0     | 1.58  | 0      |
| 60441  | 'Mrpl38'    | 99.22 | 65.52 | 86.3 | 84   | 66.7 | 85.7  | 45.3 | 97.5  | 85.18 | 84.27  |
| 60455  | 'Rxyt1'     | 0.09  | 2.43  | 1.62 | 0    | 2.41 | 0.45  | 0    | 2.47  | 1.77  | 3.12   |
| 60507  | 'Qtrt1'     | 19.81 | 18.76 | 16.2 | 28.4 | 36.3 | 45.89 | 20.3 | 18.14 | 9.92  | 19.18  |
| 60510  | 'Syt9'      | 2.12  | 2.3   | 0.91 | 8.16 | 1.25 | 6.57  | 4.47 | 0.25  | 5.39  | 1.25   |
| 60525  | 'Acss2'     | 19.14 | 16.1  | 15.5 | 3.68 | 16.5 | 29.79 | 23.8 | 16.29 | 11.95 | 15.17  |

|        |                 |       |       |      |      |      |       |      |       |       |       |
|--------|-----------------|-------|-------|------|------|------|-------|------|-------|-------|-------|
| 60527  | 'Fads3'         | 8.2   | 4.53  | 4.71 | 5.53 | 0.54 | 6.57  | 5.48 | 8.83  | 12.34 | 2.37  |
| 60530  | 'Fignl1'        | 0     | 0.98  | 0    | 0    | 2.34 | 0.35  | 0    | 0     | 0.27  | 0     |
| 60532  | 'Wtap'          | 36.35 | 34.73 | 30.4 | 59.8 | 50.3 | 29    | 27.2 | 40.47 | 60.36 | 55.12 |
| 60533  | 'Cd274'         | 1.9   | 3.65  | 0    | 1.33 | 3.34 | 1.09  | 0.01 | 0.01  | 3.52  | 5.03  |
| 60534  | 'Fancg'         | 0.6   | 1.96  | 8.9  | 0    | 3.5  | 5.7   | 12   | 5.78  | 0.04  | 6.94  |
| 60594  | 'Capn12'        | 0     | 0     | 0    | 0    | 0    | 3     | 0    | 0.06  | 0     | 0.99  |
| 60595  | 'Actn4'         | 16.64 | 22.17 | 20   | 1.65 | 18.7 | 12.35 | 5.91 | 23.22 | 27.93 | 15.96 |
| 60596  | 'Gucy1a1'       | 5.81  | 8.54  | 8.71 | 0    | 8.57 | 11.19 | 20.1 | 7.34  | 15.72 | 7.54  |
| 60597  | 'Mapk8ip2'      | 43.41 | 45.4  | 78.1 | 32.3 | 30.7 | 27.95 | 31.5 | 42.6  | 34.84 | 37.46 |
| 60599  | 'Trp53inp1'     | 1.48  | 0     | 2.72 | 2.07 | 0.07 | 0.01  | 0.02 | 0.04  | 1.2   | 0.01  |
| 60611  | 'Foxj2'         | 0.01  | 0.52  | 0.01 | 7.82 | 0.02 | 0     | 0.33 | 0.37  | 0.65  | 1.97  |
| 60613  | 'Kcnq4'         | 1.98  | 1.05  | 0    | 0    | 0.32 | 2.57  | 4.77 | 5.45  | 3.07  | 0.72  |
| 606496 | 'Gsk3a'         | 1.94  | 1.29  | 4.24 | 5.62 | 3.29 | 1.14  | 2.73 | 1.09  | 4.1   | 1.18  |
| 619287 | 'Rtl4'          | 0.76  | 1.45  | 1.05 | 3.71 | 7.42 | 2.98  | 2.46 | 1.22  | 4.71  | 8.41  |
| 619297 | 'Ccdc194'       | 0     | 0.01  | 0    | 0.01 | 0.02 | 0.02  | 0    | 0.01  | 0     | 0     |
| 619301 | 'Tmem253'       | 1.78  | 0     | 0.77 | 0    | 0    | 0     | 1.23 | 0     | 0     | 0     |
| 619326 | '9130409I23Rik' | 0     | 0     | 0    | 1.93 | 0    | 0     | 0    | 0     | 0     | 0     |
| 619329 | 'F420015M19Rik' | 0.03  | 0.2   | 0.03 | 0.14 | 0.11 | 1.2   | 0.11 | 0.12  | 0.27  | 0.06  |
| 619331 | 'Zfp551'        | 0.08  | 0.29  | 3.6  | 0.19 | 8.89 | 6.9   | 0.04 | 2.72  | 11.22 | 5.05  |
| 619332 | '4933416C03Rik' | 0     | 0     | 0    | 0    | 0    | 0     | 2.28 | 0     | 0     | 0     |
| 619441 | 'Tnfsfm13'      | 0     | 0     | 0.06 | 0    | 0    | 0     | 0    | 0     | 2.61  | 0     |
| 619547 | 'Rpl34-ps1'     | 0.27  | 0.48  | 0.52 | 0.97 | 0.17 | 0.66  | 0.35 | 2.04  | 1.07  | 0.3   |
| 619597 | 'Gal3st2c'      | 0     | 0.18  | 0.02 | 0    | 0    | 0     | 0    | 0     | 0     | 0     |
| 619605 | 'Zcchc17'       | 143.4 | 133.4 | 97.5 | 123  | 131  | 190.9 | 108  | 148   | 210.7 | 191   |
| 619883 | 'Gm6109'        | 0     | 0     | 0    | 0.14 | 0    | 0.22  | 0.43 | 0     | 0     | 0     |
| 620078 | 'C130026I21Rik' | 0     | 0     | 0    | 0    | 0    | 0     | 0    | 0.03  | 0     | 0     |
| 620235 | 'Siglec15'      | 0     | 0.15  | 0    | 0    | 0    | 0     | 0    | 0     | 0     | 0     |
| 620246 | 'Gpr52'         | 1.6   | 4.69  | 0.27 | 0    | 0.88 | 2.55  | 3.75 | 1.88  | 2.35  | 2.65  |
| 620292 | 'Cntnap5c'      | 0.81  | 1.7   | 6.93 | 11.4 | 3.31 | 8.38  | 31.9 | 6.83  | 28.69 | 20.89 |
| 620419 | 'Zfp963'        | 2.22  | 7.55  | 2.63 | 0    | 0    | 0     | 4.95 | 5.34  | 4.59  | 5.51  |
| 620592 | 'Tmem28'        | 0     | 1.93  | 4.86 | 0    | 1.48 | 0     | 0.43 | 1.24  | 1.6   | 0     |
| 620631 | 'Ttc30a2'       | 0     | 0     | 0    | 0    | 0    | 0     | 0    | 0.01  | 0     | 0     |
| 620695 | 'Gm13889'       | 7.64  | 5.09  | 6.84 | 9.57 | 1.52 | 0.72  | 2.73 | 1.4   | 3.26  | 0     |
| 620807 | 'Mup6'          | 0     | 0     | 0    | 0    | 0    | 0     | 0    | 2.14  | 0     | 0     |
| 620913 | 'Gm12185'       | 0.03  | 0.11  | 0.06 | 0.03 | 0.14 | 0.02  | 0.05 | 0.04  | 0.1   | 0.02  |
| 621080 | 'Al429214'      | 0     | 0     | 0    | 0    | 0    | 0     | 0    | 0     | 0     | 0.02  |
| 621407 | 'Gm9970'        | 0.04  | 0     | 0    | 0    | 0    | 0     | 0.99 | 0.18  | 0     | 0.35  |
| 621561 | 'Vmn1r127'      | 0     | 0     | 0    | 0.02 | 0    | 0     | 0    | 0     | 0     | 0     |
| 621580 | 'Gm21953'       | 0     | 0     | 0.27 | 2.48 | 0.2  | 0     | 0    | 0     | 0.29  | 1.68  |
| 621603 | 'Aldh3b2'       | 4.05  | 12.92 | 1.09 | 6.48 | 25.8 | 37.32 | 7.36 | 11.52 | 9.22  | 4.96  |
| 621697 | 'Rpl32l'        | 0     | 0.18  | 0    | 0    | 0    | 0     | 0.46 | 0.22  | 0     | 0.95  |
| 621823 | 'Psme2b'        | 0.91  | 0.35  | 0.78 | 2.79 | 1.27 | 2.95  | 1.41 | 0.29  | 1.23  | 0.59  |
| 621893 | 'Hist2h2ab'     | 0     | 1.24  | 0    | 0    | 0    | 0     | 0    | 0     | 0     | 0     |
| 621976 | 'Tmem170b'      | 8.01  | 6.42  | 3.99 | 2.14 | 7.41 | 1.89  | 6.9  | 8.79  | 7.96  | 8.7   |
| 622282 | 'Gm6306'        | 0     | 0     | 0    | 0    | 0.24 | 1.53  | 0    | 0     | 0     | 0.08  |
| 622307 | '5830473C10Rik' | 1.51  | 0     | 0    | 0    | 0    | 0     | 0    | 0     | 0     | 0     |
| 622320 | 'Kctd21'        | 3.43  | 1.68  | 0    | 0    | 0    | 0     | 0    | 3.74  | 0     | 0     |
| 622402 | 'Akr1c12'       | 0     | 0     | 0.2  | 0    | 0    | 0     | 0    | 0     | 0     | 0     |
| 622404 | 'Ccdc107'       | 75.81 | 65.32 | 76.6 | 168  | 123  | 149.8 | 87.2 | 107.2 | 132.4 | 82.67 |
| 622408 | 'Mcidas'        | 0     | 0     | 0    | 0    | 1.21 | 0     | 0    | 0     | 0     | 0     |
| 622434 | 'Arhgef26'      | 3.92  | 6.22  | 3.57 | 4.27 | 0.01 | 0.02  | 1.33 | 0.68  | 0     | 0     |
| 622474 | 'Smok3b'        | 0.01  | 0     | 0    | 0    | 0    | 0     | 0    | 0     | 0     | 0     |
| 622480 | 'Spocd1'        | 0     | 0     | 0.12 | 0    | 0.02 | 0     | 0    | 0     | 0     | 0.01  |
| 622486 | 'Smok3c'        | 0.01  | 0     | 0.11 | 0.1  | 0.26 | 0     | 0    | 0     | 0     | 0     |
| 622554 | 'Majin'         | 0     | 0     | 2.6  | 0    | 0    | 0     | 0    | 0     | 0     | 0     |
| 622640 | 'Gm6337'        | 0     | 0     | 0.21 | 0    | 0    | 0     | 0    | 0     | 0     | 0.06  |
| 622645 | 'Tmem200c'      | 1.41  | 0     | 0    | 0    | 0    | 0.06  | 0.51 | 0.55  | 0.03  | 0     |
| 622665 | 'Ccdc17'        | 2     | 1.25  | 0.26 | 0    | 8.22 | 14.91 | 1.15 | 3.99  | 0.49  | 1.81  |





|        |                 |       |       |      |      |      |       |      |       |       |       |
|--------|-----------------|-------|-------|------|------|------|-------|------|-------|-------|-------|
| 628518 | 'Gm6890'        | 0     | 0     | 0    | 0.08 | 0    | 0     | 0    | 0     | 0     | 0     |
| 628779 | 'Hs3st4'        | 5.23  | 0.31  | 1.51 | 7.79 | 2.27 | 0.03  | 0.07 | 1.12  | 0     | 0.31  |
| 628813 | 'Gm11437'       | 0     | 0.08  | 0    | 0    | 0    | 0     | 0    | 0.2   | 0     | 0.07  |
| 628870 | 'Otogl'         | 0     | 0.09  | 0    | 0    | 0    | 0     | 0    | 0     | 0     | 0.43  |
| 628900 | 'Serpina3i'     | 0     | 0     | 0.68 | 0    | 0    | 0     | 0    | 0     | 0     | 0     |
| 628946 | 'Vmn1r77'       | 0     | 0     | 0    | 0    | 0    | 0     | 0    | 0     | 0     | 0.05  |
| 629016 | 'Zfp953'        | 0     | 0     | 0    | 0    | 0.32 | 0     | 0    | 0     | 0     | 0     |
| 629055 | 'Gm6943'        | 0.06  | 0     | 0.1  | 0.03 | 0.08 | 0     | 0    | 0.03  | 0     | 0     |
| 629059 | 'Fam124a'       | 12.83 | 6.39  | 7.01 | 10.1 | 5.56 | 2.58  | 6.86 | 9.19  | 8.14  | 4.49  |
| 629114 | 'Defb23'        | 0     | 0     | 0    | 0.7  | 0    | 0     | 0    | 0     | 0     | 0     |
| 629147 | 'Ctxn3'         | 6.99  | 0     | 16.2 | 25.6 | 0    | 5.72  | 0    | 1.41  | 9.32  | 1.67  |
| 629242 | 'Gm6958'        | 0.3   | 1.25  | 2.14 | 0.37 | 0.3  | 1.79  | 0.58 | 0.45  | 0.66  | 0.28  |
| 629303 | 'Heatr9'        | 0     | 0.03  | 0    | 0    | 0    | 0     | 0    | 0     | 0     | 0     |
| 629378 | 'Dact3'         | 2.9   | 0.19  | 0.02 | 0.06 | 1.74 | 1.6   | 1.26 | 1.11  | 1.44  | 0.22  |
| 629499 | 'Mroh8'         | 0.03  | 0     | 0.16 | 0    | 0.12 | 0     | 1.27 | 0     | 0     | 0     |
| 629756 | 'Wfdc10'        | 0     | 1.76  | 0    | 0    | 0    | 0     | 0    | 0     | 0     | 0     |
| 630294 | 'Gm7030'        | 0     | 0     | 0    | 0    | 0.06 | 0.01  | 0    | 0.02  | 0     | 0.07  |
| 630579 | 'Zfp808'        | 0.02  | 0.11  | 0.09 | 1.37 | 2.56 | 0.04  | 0.09 | 0.59  | 1.04  | 1.03  |
| 630751 | 'LOC630751'     | 0     | 0     | 0    | 0    | 0    | 0.04  | 0    | 0     | 0     | 0     |
| 630836 | '2010315B03Rik' | 5.49  | 6.87  | 5.05 | 11.3 | 11.2 | 4.72  | 7.08 | 6.8   | 3.32  | 8.94  |
| 631145 | 'Fam90a1b'      | 0.18  | 0.38  | 0.45 | 0.68 | 0    | 0     | 0    | 0.43  | 0.34  | 0.09  |
| 631323 | 'Gm12250'       | 1.7   | 0     | 0    | 0    | 0    | 0     | 0    | 0     | 0     | 0     |
| 631584 | 'Catspere1'     | 0     | 0     | 0    | 0    | 0    | 0.03  | 0    | 0     | 0     | 0     |
| 631797 | 'Fer1l6'        | 0     | 1.11  | 0    | 0    | 0    | 0     | 0    | 0     | 0     | 0     |
| 631990 | 'Cdr1'          | 4.54  | 1.64  | 4.08 | 0.47 | 10.2 | 3.56  | 4.29 | 0.67  | 3.64  | 2.83  |
| 632126 | 'Btl4'          | 0     | 0     | 0.03 | 0    | 0    | 0     | 0    | 0.1   | 0     | 0     |
| 632687 | 'March10'       | 2.27  | 0.15  | 0    | 0    | 0    | 0.01  | 0.04 | 0     | 0.17  | 0     |
| 632778 | 'Erich4'        | 0     | 0     | 0    | 0    | 0    | 0.16  | 0    | 0     | 0     | 0     |
| 633057 | 'Gm7102'        | 0.23  | 0.87  | 1.11 | 2.68 | 0.6  | 1.21  | 0.27 | 0.27  | 0.56  | 0.27  |
| 633285 | 'Rbm46'         | 0     | 0     | 0    | 0    | 0    | 0     | 0    | 0     | 0.03  | 0     |
| 633640 | 'Tmem267'       | 0.05  | 3.04  | 2.95 | 0.13 | 2.49 | 6.57  | 2.5  | 5.77  | 9.25  | 15.69 |
| 633979 | 'Ak9'           | 0.26  | 0     | 0    | 0    | 0    | 0.25  | 0.07 | 0.13  | 0     | 0     |
| 634104 | 'Olfr287'       | 0.27  | 1.99  | 0.26 | 0    | 0    | 0     | 0    | 3.91  | 0     | 0     |
| 634731 | 'Susd1'         | 0.18  | 0.03  | 1.08 | 0.07 | 1.04 | 0.04  | 0.01 | 0     | 0.54  | 0.08  |
| 635169 | 'CK137956'      | 0     | 4.48  | 0.02 | 0    | 3.65 | 2.09  | 10.5 | 0     | 0     | 4.37  |
| 635253 | 'Usp51'         | 7.62  | 4.76  | 3.24 | 18.4 | 5.74 | 0.89  | 0.65 | 4.12  | 2     | 6.86  |
| 635668 | 'Fbxw23'        | 0.02  | 0     | 0.03 | 0.1  | 0.08 | 0     | 0    | 0.05  | 0.02  | 0     |
| 635702 | 'Naaladl2'      | 0.27  | 0.83  | 0.01 | 0    | 0.35 | 0     | 0.04 | 0     | 0     | 0     |
| 636104 | 'Gm7173'        | 0     | 0     | 0    | 0    | 1.38 | 0     | 2.77 | 2.55  | 1.35  | 0.33  |
| 636741 | 'Zfp964'        | 1.64  | 0.36  | 0.37 | 0.08 | 0.14 | 0.35  | 3.6  | 0.2   | 0.31  | 0.31  |
| 636808 | 'Cntnap5a'      | 2.28  | 1.54  | 1.75 | 0.78 | 3.09 | 1.01  | 5.9  | 1.05  | 2.85  | 0.37  |
| 636931 | 'Trim71'        | 0     | 0     | 0    | 0    | 0    | 0     | 0    | 0     | 1.54  | 0     |
| 637004 | 'Vmn2r3'        | 0     | 0.31  | 0.32 | 0    | 0    | 0.49  | 0    | 0     | 0     | 0     |
| 637053 | 'Vmn2r4'        | 0     | 0     | 0    | 0    | 0    | 0     | 0.02 | 0     | 0     | 0     |
| 637079 | 'lqcn'          | 0     | 0.52  | 0.51 | 1.79 | 0    | 1.54  | 0    | 0.38  | 0     | 0.71  |
| 637277 | 'Sycp2l'        | 0     | 0.19  | 0.02 | 0    | 0    | 0     | 0    | 1.06  | 0     | 0     |
| 637515 | 'Nlrp1b'        | 0.89  | 0.95  | 1.21 | 2.3  | 2.08 | 1.49  | 1.11 | 0.48  | 0.89  | 1.05  |
| 637896 | 'Vmn2r78'       | 0     | 0     | 0    | 0    | 0    | 0     | 0    | 0     | 0     | 0.28  |
| 638102 | 'Vmn2r115'      | 0     | 0     | 0    | 0.02 | 0    | 0     | 0    | 0     | 0     | 0     |
| 638262 | 'Gm7233'        | 0     | 0     | 0    | 0.68 | 0.84 | 0     | 0    | 0     | 0     | 0     |
| 63828  | 'Fn3k'          | 19.1  | 50.16 | 47.4 | 25.9 | 40.3 | 50.79 | 24.3 | 44.36 | 30.41 | 33.86 |
| 63856  | 'Taf8'          | 8.38  | 17.18 | 7.86 | 6.65 | 8.25 | 2.08  | 0.02 | 9.5   | 17    | 12.01 |
| 63857  | 'Bco1'          | 0     | 0.04  | 0    | 0.37 | 0    | 0     | 0.02 | 2.21  | 0     | 0.55  |
| 638580 | 'Gm7244'        | 0     | 0.21  | 0    | 0    | 0    | 0     | 0    | 0     | 0     | 0     |
| 63859  | 'Impg1'         | 0     | 1.76  | 0    | 0    | 1.22 | 0     | 0    | 0.42  | 0     | 0     |
| 63872  | 'Zfp296'        | 0     | 0     | 0    | 0    | 0    | 0     | 0    | 0     | 0     | 0.73  |
| 63873  | 'Trpv4'         | 0     | 0.1   | 0    | 1.04 | 0    | 0.29  | 0    | 0     | 0     | 0     |
| 63913  | 'Fam129a'       | 0     | 0     | 0    | 0    | 0    | 0.36  | 0    | 0     | 0     | 0     |

|        |           |       |       |      |      |      |       |      |       |       |         |
|--------|-----------|-------|-------|------|------|------|-------|------|-------|-------|---------|
| 63953  | 'Dusp10'  | 1.93  | 6.12  | 12.1 | 4.5  | 3.05 | 0.23  | 7.37 | 6.69  | 4.22  | 1.87    |
| 63954  | 'Rbp7'    | 0.08  | 0     | 0    | 0    | 0    | 0     | 0    | 0     | 0     | 0       |
| 63955  | 'Cables1' | 0.12  | 1.12  | 2.26 | 6.69 | 1.12 | 2.97  | 6.31 | 0     | 3.13  | 0.46    |
| 63958  | 'Ube4b'   | 8.53  | 11.92 | 19.8 | 10.2 | 9.48 | 4.87  | 12.8 | 6.18  | 11.49 | 4.89    |
| 63959  | 'Slc29a1' | 31.67 | 34.33 | 47.4 | 16.8 | 39.5 | 35.08 | 94.8 | 10.38 | 56.11 | 52.43   |
| 639774 | 'Skint8'  | 1.49  | 1.31  | 1.82 | 3.19 | 1.9  | 1.39  | 2.03 | 0.66  | 2.05  | 1.33    |
| 63985  | 'Gmfb'    | 46.16 | 41.26 | 35.7 | 32.7 | 36.2 | 22.52 | 43   | 48.1  | 37.83 | 49.21   |
| 63986  | 'Gmfg'    | 0     | 0.02  | 0    | 0    | 2.28 | 0     | 0    | 0     | 0     | 2.35    |
| 639910 | 'Gm20767' | 0     | 0.03  | 0    | 0    | 0    | 0     | 0    | 0     | 0     | 0       |
| 63993  | 'Slc5a7'  | 0.19  | 0     | 0    | 0    | 0.19 | 0     | 0    | 1.23  | 0.3   | 0       |
| 64008  | 'Aqp9'    | 0     | 0     | 0    | 0    | 0    | 0     | 3.68 | 0     | 0     | 0       |
| 64009  | 'Syne1'   | 13.32 | 17.67 | 9.46 | 32.2 | 17.8 | 22.23 | 23.5 | 18.52 | 51.25 | 46.4    |
| 64010  | 'Sav1'    | 0.4   | 0     | 0    | 0.07 | 0.16 | 0.07  | 0.04 | 0.13  | 0     | 0       |
| 64011  | 'Nrgn'    | 14.66 | 6.03  | 2.2  | 0.5  | 38.1 | 6.86  | 1.9  | 28.69 | 12.86 | 2.06    |
| 64050  | 'Yeats4'  | 13.69 | 31.88 | 24.6 | 34.6 | 17.8 | 20.07 | 6.28 | 17.19 | 15.56 | 15.46   |
| 64051  | 'Sv2a'    | 105.8 | 77.84 | 136  | 31.8 | 95.2 | 63.8  | 93.4 | 104.6 | 116.8 | 100.25  |
| 640524 | 'Sptbn5'  | 0     | 0     | 0.58 | 0    | 0.54 | 1.32  | 0    | 0.19  | 0.21  | 0.33    |
| 640543 | 'Tgm7'    | 0.17  | 0     | 0    | 0    | 0    | 0     | 0    | 0.03  | 0     | 0       |
| 64058  | 'Perp'    | 3.12  | 0.96  | 4.85 | 0    | 0    | 2.14  | 0    | 0     | 3.83  | 1.26    |
| 64059  | 'Oxct2a'  | 0.17  | 0.17  | 0    | 0    | 0.14 | 0.1   | 0.12 | 0.04  | 0.03  | 0.22    |
| 64074  | 'Smoc2'   | 2.79  | 0     | 21.1 | 0    | 0    | 0     | 0    | 0     | 0     | 0       |
| 64075  | 'Smoc1'   | 21.85 | 42.68 | 25.5 | 1.83 | 22.3 | 3.85  | 14.7 | 5.73  | 9.74  | 14.71   |
| 64082  | 'Popdc2'  | 0.04  | 0     | 0.18 | 0.06 | 0.11 | 0.04  | 0.02 | 0     | 0.06  | 0       |
| 64085  | 'Clstn2'  | 2.45  | 1     | 7.87 | 4.89 | 1.67 | 2.75  | 1.28 | 8.65  | 2.68  | 3.17    |
| 64095  | 'Gpr35'   | 0     | 0.65  | 2.25 | 1.95 | 0    | 0     | 0    | 0     | 0.02  | 0       |
| 64103  | 'Tnmd'    | 2     | 0     | 3.22 | 0    | 0    | 2.46  | 0    | 1.51  | 0     | 1.64    |
| 64113  | 'Moap1'   | 32.65 | 17.85 | 35.3 | 18.9 | 25.9 | 33.75 | 38.9 | 42.58 | 23.22 | 25.78   |
| 641340 | 'Nrbf2'   | 17.65 | 21.93 | 25.7 | 28.4 | 15.6 | 16.9  | 33.8 | 27.6  | 32.24 | 13.07   |
| 64136  | 'Sdf2l1'  | 72.77 | 76.01 | 36.3 | 17.1 | 29.3 | 65.29 | 19.9 | 38.42 | 131.5 | 26.4    |
| 641361 | 'Pinlyp'  | 0     | 0     | 0    | 0    | 0    | 0     | 0    | 0     | 0     | 0.93    |
| 641376 | 'Tomm40l' | 26.53 | 18.6  | 25   | 8.91 | 24.5 | 44.42 | 43   | 18.62 | 16.77 | 21.51   |
| 64138  | 'Ctsz'    | 81.76 | 53.14 | 103  | 99.7 | 40.1 | 293.5 | 58.8 | 112.9 | 156.2 | 270.16  |
| 64143  | 'Ralb'    | 6.15  | 9.57  | 10.1 | 14.5 | 11.9 | 0     | 9.99 | 5.62  | 1.52  | 2.61    |
| 64144  | 'MlIt1'   | 1.71  | 3.67  | 2.15 | 0    | 0    | 0     | 6.61 | 3.69  | 0     | 3.48    |
| 64176  | 'Sv2b'    | 6.08  | 3.24  | 9.73 | 0.66 | 2.5  | 1.35  | 4.15 | 15.31 | 4.76  | 11.22   |
| 64177  | 'Trpv6'   | 0     | 0     | 0    | 0    | 0    | 0     | 0.41 | 0.01  | 0     | 0.13    |
| 64209  | 'Herpud1' | 137.8 | 174.6 | 92.3 | 180  | 93   | 78.66 | 153  | 160.2 | 111.1 | 145.49  |
| 64213  | 'St7'     | 26.97 | 27.9  | 12.8 | 11.2 | 12.4 | 20.87 | 22.1 | 24.18 | 9.13  | 21.75   |
| 64242  | 'Ngb'     | 401.4 | 520.9 | 170  | 342  | 304  | 561.2 | 293  | 259.2 | 222   | 439.14  |
| 64290  | 'Foxb1'   | 1.74  | 0.06  | 0    | 0    | 0.82 | 0     | 0    | 0.32  | 0     | 0       |
| 64291  | 'Osbp1a'  | 23.65 | 17.84 | 41.8 | 15.6 | 29.9 | 27.41 | 18.5 | 11.12 | 10.88 | 11.01   |
| 64292  | 'Ptges'   | 1.75  | 3.39  | 1.57 | 0    | 0    | 2.6   | 1.08 | 0.69  | 0     | 5.21    |
| 64293  | 'Stk32b'  | 0     | 4.25  | 0.9  | 0    | 3.66 | 3.6   | 0    | 1.91  | 0.01  | 1.42    |
| 64294  | 'ltn2c'   | 2090  | 2130  | 1429 | 1524 | 1504 | 1766  | 1195 | 1898  | 1455  | 2095.34 |
| 64295  | 'Tmub1'   | 43.99 | 27.18 | 29.7 | 24.8 | 62   | 53.97 | 31.2 | 41.05 | 73.34 | 76.8    |
| 64296  | 'Abhd8'   | 185.2 | 197.6 | 186  | 147  | 167  | 177.9 | 163  | 142.8 | 165.3 | 100.12  |
| 64297  | 'Gprc5b'  | 2.19  | 4.29  | 11.3 | 5.54 | 5.81 | 5.73  | 1.49 | 1.03  | 7.68  | 1.41    |
| 64337  | 'Gng13'   | 7.81  | 14.98 | 47.1 | 43.1 | 11.2 | 13.91 | 2.55 | 20.52 | 40.43 | 0.24    |
| 64339  | 'Fndc4'   | 23    | 5.47  | 11.5 | 15   | 26.6 | 15.59 | 15   | 18.71 | 37.92 | 1.71    |
| 64340  | 'Dhx38'   | 2.74  | 7.29  | 8    | 7.54 | 4.65 | 3.59  | 3.92 | 8.57  | 0.07  | 16.48   |
| 64378  | 'Gpr88'   | 0     | 0.04  | 0    | 13.4 | 0    | 1.59  | 0.01 | 0.31  | 0.49  | 0.02    |
| 64383  | 'Sirt2'   | 60.68 | 101   | 92.9 | 60   | 100  | 82.25 | 77.8 | 57.22 | 80.58 | 82.62   |
| 64384  | 'Sirt3'   | 50.06 | 46.38 | 99.7 | 53   | 46.9 | 76.34 | 50.1 | 65.64 | 48.57 | 73.85   |
| 64385  | 'Cyp4f14' | 1.44  | 7.09  | 0    | 0    | 0    | 0     | 0    | 2.04  | 2.25  | 0       |
| 64424  | 'Polr1e'  | 2.22  | 7.69  | 6.49 | 4.56 | 4.43 | 4.87  | 7.26 | 5.2   | 3.32  | 5.72    |
| 64436  | 'Inpp5e'  | 6.14  | 9.5   | 10.9 | 12.1 | 10.6 | 4.47  | 11.7 | 13    | 10.17 | 2.27    |
| 64450  | 'Gpr85'   | 35.2  | 22.13 | 43.3 | 37   | 41.8 | 9.88  | 28.2 | 31.21 | 34.01 | 32.56   |
| 64451  | 'Dip2a'   | 0.22  | 1.07  | 0.99 | 0.2  | 1.11 | 1.29  | 2.45 | 1.98  | 5.03  | 1.89    |

|        |            |       |       |      |      |      |       |      |       |       |         |
|--------|------------|-------|-------|------|------|------|-------|------|-------|-------|---------|
| 64453  | 'Zfp280b'  | 4.53  | 3.63  | 10.5 | 4    | 5.45 | 5.26  | 6.07 | 10.7  | 12.31 | 3.71    |
| 64540  | 'Tspan4'   | 12.13 | 8.87  | 34.8 | 9.48 | 32.1 | 41.91 | 22.6 | 29.15 | 8.72  | 0       |
| 64580  | 'Ndst4'    | 6.75  | 1.52  | 6.72 | 4.49 | 3.86 | 34.13 | 1.01 | 1.05  | 2.01  | 3.59    |
| 64602  | 'Ireb2'    | 4.01  | 4.09  | 3.76 | 10.8 | 4.94 | 2.02  | 3.5  | 4.18  | 5.36  | 3.2     |
| 64652  | 'Nisch'    | 68.22 | 63.88 | 106  | 37   | 44.6 | 25.1  | 82.5 | 48.07 | 44.36 | 54.35   |
| 64654  | 'Fgf23'    | 1.02  | 0.73  | 0.62 | 0    | 0.27 | 0     | 0.02 | 1.43  | 3.95  | 0       |
| 64655  | 'Mrps22'   | 32.34 | 46.17 | 40.9 | 47.4 | 21.4 | 50.51 | 31.9 | 38.79 | 19.91 | 38.44   |
| 64656  | 'Mrps23'   | 36.51 | 31.33 | 60   | 41.1 | 40.9 | 59.16 | 26.8 | 53.54 | 46.97 | 26.75   |
| 64657  | 'Mrps10'   | 57.22 | 68.77 | 74.4 | 101  | 107  | 141.5 | 48.2 | 78.83 | 98.18 | 104.12  |
| 64658  | 'Mrps25'   | 12.52 | 14.12 | 17.1 | 12.4 | 12.4 | 20.97 | 17.2 | 16.93 | 8.62  | 10.93   |
| 64659  | 'Mrps14'   | 134   | 118.7 | 79   | 85.1 | 160  | 156.4 | 106  | 96.23 | 127.9 | 133.81  |
| 64660  | 'Mrps24'   | 73.24 | 84.82 | 83.2 | 73.5 | 60.3 | 82.68 | 97.7 | 78.04 | 62.28 | 61.36   |
| 64685  | 'Nmi'      | 0.54  | 2.6   | 11.2 | 14.2 | 3.81 | 6.04  | 4.68 | 0     | 3.62  | 3.82    |
| 64704  | 'Htra2'    | 41.77 | 35.81 | 45.5 | 16.2 | 37.1 | 47.27 | 37.4 | 45.91 | 44.89 | 48.23   |
| 64705  | 'Dpys'     | 0     | 0     | 0    | 0    | 0.91 | 0     | 2.25 | 0     | 0.09  | 0       |
| 64706  | 'Scube1'   | 1.27  | 0.58  | 2.21 | 0    | 0.69 | 0.35  | 0.98 | 0.01  | 0     | 0.01    |
| 64707  | 'Suv39h2'  | 0.01  | 0.12  | 0    | 0    | 0.1  | 0     | 0    | 0     | 1.37  | 0       |
| 64833  | 'Acot10'   | 0     | 0.03  | 1.65 | 0    | 0.03 | 4.91  | 0    | 0.48  | 0     | 0       |
| 64898  | 'Lpin2'    | 11.99 | 11.96 | 17.8 | 9.75 | 7.68 | 11.79 | 12.3 | 10.43 | 7.64  | 10.68   |
| 64899  | 'Lpin3'    | 0     | 0     | 0    | 0    | 0    | 2.36  | 0    | 0     | 2.51  | 1.03    |
| 64930  | 'Tsc1'     | 6.78  | 5.88  | 6.17 | 8.6  | 3.5  | 2.94  | 4.03 | 3.34  | 4.01  | 4.75    |
| 64933  | 'Ap3m2'    | 33.82 | 49.27 | 55.8 | 57.7 | 50.1 | 35    | 28.2 | 54.09 | 61.21 | 50.34   |
| 64934  | 'Pes1'     | 14.73 | 19.78 | 30.3 | 7.18 | 14.2 | 23.08 | 36   | 23.68 | 19.98 | 23.57   |
| 64945  | 'Cldn12'   | 8     | 3.76  | 13.2 | 14.2 | 14   | 0.01  | 3.11 | 1.27  | 12.15 | 8.61    |
| 65019  | 'Rpl23'    | 78.05 | 84.98 | 68.9 | 100  | 76.4 | 100.4 | 75   | 62.27 | 97.7  | 79.51   |
| 65020  | 'Zfp110'   | 0     | 2.93  | 8.06 | 1.28 | 5.01 | 4.4   | 0.68 | 5.32  | 1.05  | 0.72    |
| 65079  | 'Rtn4r'    | 0     | 1.39  | 0.57 | 0    | 3.88 | 0     | 6.54 | 0.02  | 0     | 0       |
| 65086  | 'Lpar3'    | 0     | 0     | 0    | 0    | 0    | 0     | 0    | 1.09  | 0     | 0       |
| 65098  | 'Zfand6'   | 30.72 | 49.06 | 17.8 | 48.1 | 64.8 | 44.56 | 57.5 | 23.65 | 73.99 | 38.26   |
| 65099  | 'Irak1bp1' | 19.06 | 11.64 | 13.1 | 27.2 | 15.5 | 15.64 | 8.11 | 8.63  | 17.78 | 7.16    |
| 65100  | 'Zic5'     | 0.63  | 1.06  | 0    | 0    | 3.19 | 2.25  | 6.26 | 0     | 1.77  | 5.74    |
| 65102  | 'Nif311'   | 26.44 | 21.7  | 29.6 | 20   | 43.3 | 49.21 | 53.4 | 33.39 | 40.45 | 26.36   |
| 65103  | 'Arl6ip6'  | 8.23  | 2.02  | 0.88 | 2.64 | 6.16 | 3.84  | 0    | 2.08  | 0     | 6.48    |
| 65105  | 'Arl6ip4'  | 71.18 | 68.02 | 48.2 | 49.2 | 106  | 35.77 | 70.8 | 62.85 | 78.51 | 43.5    |
| 65106  | 'Arl6ip5'  | 318.2 | 256   | 149  | 148  | 239  | 307.3 | 226  | 353.3 | 300.4 | 310.87  |
| 65107  | 'Lrp10'    | 4.27  | 4.45  | 3.04 | 11.6 | 1.87 | 4.29  | 0    | 3.01  | 15.06 | 1.06    |
| 65111  | 'Dap3'     | 55.05 | 81.31 | 62.5 | 54.1 | 66.7 | 97.29 | 76.8 | 54.35 | 70    | 58.55   |
| 65112  | 'Pmepa1'   | 1.86  | 1.93  | 1.36 | 6.69 | 1.36 | 2.4   | 0.11 | 1.95  | 0.88  | 0.08    |
| 65113  | 'Ndfip1'   | 1757  | 1885  | 1404 | 1623 | 1259 | 2009  | 1610 | 2052  | 1981  | 2021.29 |
| 65114  | 'Vps35'    | 114.3 | 96.37 | 81.8 | 53.9 | 50.3 | 46.06 | 111  | 92.75 | 90.53 | 111.63  |
| 65115  | 'Bean1'    | 3.27  | 0.42  | 1.64 | 0.02 | 12.1 | 0.02  | 6.54 | 1.06  | 1.25  | 0       |
| 65116  | 'Prrg2'    | 0.98  | 14.29 | 1.58 | 1.34 | 35.2 | 2.61  | 4.78 | 2.9   | 4.06  | 7.58    |
| 65221  | 'Slc15a3'  | 0     | 1.1   | 0    | 0.27 | 0    | 0     | 0    | 0     | 0     | 0       |
| 65246  | 'Xpo7'     | 3.75  | 6.49  | 3.64 | 4.76 | 5.97 | 1.56  | 11.2 | 4.71  | 7.33  | 5.83    |
| 65247  | 'Asb1'     | 1.7   | 3.43  | 3.11 | 0.75 | 1.98 | 0     | 2.42 | 1.72  | 2.98  | 0.95    |
| 65254  | 'Dpysl5'   | 12.79 | 15.43 | 5.22 | 0.71 | 2.56 | 2.69  | 13.2 | 12.62 | 11.85 | 19.92   |
| 65255  | 'Asb4'     | 32.71 | 36.17 | 9.93 | 43.2 | 0.3  | 47.39 | 5.74 | 10.3  | 51.88 | 48.59   |
| 65256  | 'Asb2'     | 0.06  | 1.06  | 0.14 | 0    | 2.29 | 2.52  | 0.04 | 0.01  | 3.37  | 1.45    |
| 65257  | 'Asb3'     | 21.92 | 16.63 | 17.7 | 13.9 | 13.4 | 18.9  | 14   | 17.44 | 35.58 | 10.87   |
| 652925 | 'Tmem243'  | 0.14  | 0     | 0.05 | 0    | 1.39 | 0     | 0.05 | 0.72  | 0     | 0       |
| 654309 | 'Nrp'      | 5.92  | 8.29  | 5.93 | 13.3 | 5.45 | 4.26  | 6.8  | 2.46  | 2.3   | 4.28    |
| 654459 | 'Defb25'   | 8.2   | 1.21  | 1.83 | 0    | 3.51 | 0     | 0    | 4.13  | 1.12  | 3.13    |
| 654462 | 'Kncn'     | 0     | 0     | 0.73 | 0    | 0    | 0     | 0    | 1.65  | 0     | 0.62    |
| 654470 | 'Tctn1'    | 9.85  | 9.21  | 7.4  | 2.73 | 6.91 | 2.9   | 0.06 | 9.86  | 7.87  | 15.77   |
| 654795 | 'Sdr39u1'  | 124.6 | 111.1 | 96.2 | 185  | 124  | 218.9 | 172  | 138.3 | 118.9 | 121.81  |
| 654801 | 'Zfp784'   | 0.23  | 3.78  | 7.35 | 0    | 10.2 | 4.19  | 0.02 | 4.24  | 15.19 | 3.63    |
| 654812 | 'Angptl7'  | 0.28  | 0     | 0    | 0.03 | 0    | 0     | 0    | 0     | 0     | 0       |
| 654818 | 'Smco3'    | 6.79  | 6.02  | 0    | 0    | 5.24 | 2.96  | 0    | 0     | 0     | 0.96    |

|        |                 |       |       |      |      |      |       |      |       |       |        |
|--------|-----------------|-------|-------|------|------|------|-------|------|-------|-------|--------|
| 654821 | 'Gcnt7'         | 0     | 0     | 0    | 0    | 0.02 | 2.46  | 4.59 | 0     | 0.29  | 0.02   |
| 654824 | 'Ankrd37'       | 24.39 | 15.04 | 8.66 | 1.19 | 30.2 | 35.44 | 8.72 | 9.62  | 12.35 | 7.41   |
| 65945  | 'Clstn1'        | 25.14 | 26.43 | 53.2 | 45.1 | 37.6 | 32.59 | 37.6 | 20.59 | 31.66 | 29.75  |
| 65960  | 'Twsg1'         | 5.98  | 4.71  | 5.22 | 15.5 | 4.48 | 0     | 0.26 | 2.12  | 6.37  | 1.74   |
| 65961  | 'Utp3'          | 41.28 | 23.42 | 29.4 | 19.7 | 38.6 | 49.17 | 20.1 | 42.1  | 19.99 | 20.13  |
| 65962  | 'Slc9a3r2'      | 23.75 | 17.03 | 40.6 | 11.5 | 56.4 | 17.18 | 22.1 | 18.54 | 32.72 | 9.57   |
| 65963  | 'Tmem176b'      | 47.58 | 220.7 | 106  | 106  | 114  | 110.4 | 56.5 | 62.32 | 82.98 | 169.4  |
| 65964  | 'Map3k20'       | 0.77  | 0.73  | 0.34 | 0.01 | 2.54 | 0     | 0    | 0.11  | 0.02  | 0.07   |
| 65967  | 'Eefsec'        | 20.62 | 22.2  | 10.7 | 30.1 | 27.2 | 7.26  | 15.3 | 18.71 | 13.14 | 23.49  |
| 65969  | 'Cubn'          | 0     | 0     | 0.02 | 0    | 0    | 0     | 0    | 0     | 0.09  | 0.1    |
| 65970  | 'Lima1'         | 0     | 1.62  | 0    | 2.48 | 0.09 | 0.13  | 5.83 | 1.4   | 1.36  | 1.36   |
| 65971  | 'Tbata'         | 0     | 2.98  | 0    | 0    | 0    | 0     | 0    | 0     | 0     | 0      |
| 65972  | 'Ifi30'         | 0     | 5.64  | 2.24 | 1.87 | 0.21 | 0.1   | 8.2  | 2.72  | 0     | 1.22   |
| 65973  | 'Asph'          | 42.41 | 74.24 | 25.7 | 18   | 49.7 | 68.54 | 48.6 | 52.43 | 80.38 | 74.05  |
| 66011  | 'Ranbp17'       | 0.51  | 2.03  | 0.1  | 3.6  | 1.03 | 0.02  | 1.49 | 0.69  | 2.17  | 0.36   |
| 66039  | 'Tmem254a'      | 2.57  | 3.08  | 4.19 | 0.08 | 6.28 | 0     | 14.3 | 6.7   | 17.98 | 5.55   |
| 66042  | 'Sostdc1'       | 2.31  | 0     | 16.1 | 0    | 0    | 6.12  | 0    | 0.46  | 0     | 0.32   |
| 66043  | 'Atp5d'         | 337   | 387.9 | 316  | 343  | 348  | 548.8 | 503  | 397.1 | 349.4 | 413.81 |
| 66044  | 'Dtd1'          | 167.9 | 156.6 | 202  | 192  | 270  | 203.4 | 262  | 238.7 | 150   | 166.47 |
| 66046  | 'Ndufb5'        | 312.9 | 349.2 | 377  | 289  | 314  | 350.8 | 336  | 346.6 | 304.8 | 345.12 |
| 66047  | 'Mrpl54'        | 127.4 | 111.7 | 125  | 130  | 131  | 182.3 | 134  | 106.1 | 127.5 | 120.67 |
| 66048  | 'Emc6'          | 90.34 | 79.66 | 71.4 | 135  | 54.6 | 71.89 | 79.7 | 94.17 | 60.16 | 77.64  |
| 66049  | 'Rogdi'         | 425.3 | 425.9 | 417  | 438  | 515  | 458.7 | 384  | 434.5 | 246.2 | 364.43 |
| 66050  | '0610009B22Rik' | 99.49 | 73.88 | 64   | 106  | 70.1 | 79.85 | 61   | 77.56 | 75.64 | 65.86  |
| 66052  | 'Sdhc'          | 217.4 | 202   | 208  | 281  | 188  | 357.8 | 290  | 278.6 | 227.1 | 175.36 |
| 66053  | 'Ppil2'         | 72.82 | 76.71 | 78.6 | 91   | 90.2 | 89.3  | 67.2 | 80.91 | 67.02 | 75.8   |
| 66054  | 'Cndp2'         | 28.2  | 31.99 | 29.8 | 29.6 | 41.2 | 42.57 | 31.6 | 31.2  | 44.9  | 29.6   |
| 66055  | 'Sf3b6'         | 62.77 | 73.57 | 120  | 92.8 | 54.6 | 97.2  | 65.3 | 89.58 | 98.68 | 80.68  |
| 66056  | 'Zfp524'        | 4.12  | 6.26  | 7.84 | 0    | 6    | 8.37  | 0    | 3.48  | 7.7   | 3      |
| 66058  | 'Tmem176a'      | 42.22 | 72.69 | 44.4 | 21.3 | 38.6 | 52.62 | 35.9 | 16.09 | 58.45 | 107.58 |
| 66059  | 'Krtcap2'       | 178.1 | 155.4 | 137  | 121  | 129  | 139.4 | 123  | 116.8 | 165.9 | 87.77  |
| 66060  | 'Cystm1'        | 72.2  | 78.15 | 51   | 144  | 189  | 119.5 | 79.8 | 57.28 | 76.38 | 146.87 |
| 66061  | 'Tctex1d2'      | 49.91 | 47.89 | 24.8 | 36.5 | 46.4 | 69.23 | 40.1 | 32.6  | 70.53 | 43.79  |
| 66066  | 'Gng11'         | 10.46 | 1.75  | 10.9 | 12.6 | 13.2 | 7.28  | 12.1 | 4.45  | 6.4   | 2.64   |
| 66067  | 'Gtpbp8'        | 16.9  | 17.73 | 15.1 | 13.8 | 19.1 | 16.77 | 12.5 | 25.89 | 21.64 | 16.22  |
| 66069  | 'Snupn'         | 14.14 | 18.13 | 11   | 13.4 | 38.1 | 32.34 | 15.3 | 21.21 | 31.86 | 15.83  |
| 66070  | 'Cwc15'         | 92.36 | 68.59 | 87.1 | 64.1 | 63.8 | 111.6 | 73.8 | 54.75 | 55.54 | 83.64  |
| 66071  | 'Ethe1'         | 51.2  | 71.86 | 44.1 | 81.3 | 14   | 63.08 | 20.3 | 83.09 | 47.93 | 67.21  |
| 66072  | 'Sdhaf2'        | 17.85 | 31.38 | 20.7 | 22.4 | 32   | 13.47 | 18.1 | 25.09 | 33.65 | 45.7   |
| 66073  | 'Txndc12'       | 24.92 | 58.38 | 35.9 | 66.5 | 17.3 | 101.3 | 63   | 56.88 | 75.02 | 57.92  |
| 66074  | 'Tmem167'       | 7.77  | 5.37  | 6.8  | 3.35 | 7.33 | 8.75  | 9.71 | 6.85  | 7.98  | 6.51   |
| 66075  | 'Chchd3'        | 54.26 | 29.6  | 47.1 | 33.1 | 48.8 | 50.14 | 36.8 | 45.32 | 37.61 | 50.71  |
| 66077  | 'Aurkaip1'      | 97.28 | 114.6 | 123  | 211  | 131  | 169.2 | 145  | 148.9 | 129   | 135.94 |
| 66078  | 'Tsen34'        | 76.47 | 106.2 | 160  | 301  | 98.9 | 77.93 | 104  | 76.42 | 83.13 | 20.93  |
| 66079  | 'Tmem42'        | 20.32 | 32.75 | 5.94 | 68.3 | 3.99 | 5.03  | 12.2 | 30.97 | 10.13 | 17.54  |
| 66082  | 'Abhd6'         | 18.97 | 36.52 | 23.5 | 23.9 | 23.5 | 27.94 | 15.7 | 25.44 | 19.94 | 21.35  |
| 66083  | 'Setd6'         | 5.44  | 6.74  | 0.02 | 20.7 | 6.3  | 0.03  | 3.91 | 9.38  | 7.32  | 16.43  |
| 66084  | 'Rmnd1'         | 33.69 | 25.77 | 23.6 | 4.51 | 14.2 | 0.79  | 24   | 23    | 13.92 | 13.59  |
| 66085  | 'Eif3f'         | 20.57 | 28.18 | 65.4 | 95.5 | 15.8 | 20.25 | 36.6 | 8.81  | 41.88 | 8.77   |
| 66086  | 'Fopnl'         | 65.88 | 88.8  | 74   | 60.6 | 83.4 | 96.2  | 101  | 83.03 | 74.93 | 94.9   |
| 66087  | 'Emc3'          | 71.13 | 88.11 | 54.8 | 79.8 | 71.6 | 52.47 | 56.1 | 66.58 | 64.09 | 48.01  |
| 66089  | 'Rmnd5b'        | 26.51 | 32.2  | 36.8 | 12.2 | 37.3 | 36.55 | 46.3 | 41.98 | 31.13 | 18.29  |
| 66090  | 'Ypel3'         | 48.56 | 40.81 | 38.7 | 174  | 54.3 | 82.71 | 62   | 84.03 | 73.16 | 30.08  |
| 66091  | 'Ndufa3'        | 320.6 | 372.4 | 521  | 866  | 389  | 842.9 | 375  | 216.2 | 630.1 | 294.58 |
| 66092  | 'Ghitm'         | 224.6 | 216   | 213  | 155  | 190  | 225   | 202  | 226   | 195.9 | 209.91 |
| 66094  | 'Lsm7'          | 241.4 | 233   | 317  | 434  | 258  | 388.7 | 251  | 233.6 | 364.2 | 234.14 |
| 66096  | 'Lamtor4'       | 74.46 | 70.21 | 50.4 | 56.3 | 135  | 117.9 | 77.9 | 80.09 | 69.33 | 108.38 |
| 66098  | 'Chchd6'        | 204.2 | 172.8 | 179  | 161  | 206  | 278.1 | 161  | 247.6 | 233.6 | 244.94 |

|       |                 |       |       |      |      |      |       |      |       |       |        |
|-------|-----------------|-------|-------|------|------|------|-------|------|-------|-------|--------|
| 66101 | 'Ppih'          | 22.64 | 13.47 | 27.5 | 19.6 | 23.1 | 21.92 | 32.1 | 11.45 | 27.45 | 15.45  |
| 66102 | 'Cxcl16'        | 0.07  | 0.67  | 0    | 0    | 0.25 | 4.03  | 0    | 0     | 3.62  | 0      |
| 66104 | 'Tceal6'        | 79.1  | 58.89 | 90   | 54.4 | 42   | 45.61 | 78.3 | 58.1  | 80.51 | 33.37  |
| 66105 | 'Ube2d3'        | 75.71 | 85.01 | 66.9 | 115  | 61.9 | 41.9  | 92.8 | 74.78 | 77.72 | 62.15  |
| 66106 | 'Smpx'          | 0.15  | 0.06  | 0.8  | 0.29 | 0.05 | 0.39  | 0.1  | 0     | 0.08  | 0.33   |
| 66107 | 'Wfdc21'        | 0.23  | 0     | 0    | 0    | 0    | 0     | 0    | 0     | 0     | 0      |
| 66108 | 'Ndufa9'        | 130   | 140.8 | 173  | 134  | 132  | 161.7 | 169  | 193.1 | 162   | 141.9  |
| 66109 | 'Tspan13'       | 202.1 | 246.1 | 153  | 194  | 214  | 202.9 | 151  | 192.1 | 257.3 | 278.75 |
| 66111 | 'Tmed3'         | 94.91 | 175.4 | 69.5 | 117  | 96.6 | 88.42 | 75.6 | 78.38 | 147   | 138.42 |
| 66112 | 'Marc1'         | 0.25  | 0     | 0    | 0    | 0.08 | 0     | 0    | 0     | 0     | 0.1    |
| 66114 | 'Dnajc30'       | 62.21 | 89.93 | 52.8 | 56.3 | 96.2 | 119.1 | 85   | 69.27 | 42.37 | 64.47  |
| 66116 | 'Nat8f1'        | 38.15 | 13.93 | 27.8 | 33.3 | 38.7 | 37.74 | 43   | 17.32 | 34.46 | 13.45  |
| 66117 | 'Fmc1'          | 82.52 | 91.82 | 143  | 87.7 | 103  | 218.6 | 132  | 69.98 | 154.6 | 136.7  |
| 66118 | 'Sarnp'         | 121.2 | 129.9 | 91.8 | 176  | 113  | 102.5 | 95   | 130.7 | 110.4 | 143.71 |
| 66119 | 'Tomm6'         | 259.6 | 238.9 | 235  | 321  | 276  | 354.1 | 185  | 235.7 | 271.5 | 232.03 |
| 66120 | 'Fkbp11'        | 10.82 | 39.39 | 12.4 | 69.3 | 0.17 | 24.61 | 0    | 23.12 | 20.28 | 29.13  |
| 66121 | 'Chchd1'        | 193   | 130.5 | 144  | 134  | 213  | 162.7 | 118  | 124.9 | 116.6 | 193.99 |
| 66124 | 'Josd2'         | 43.4  | 63.97 | 28.1 | 50.5 | 57.3 | 105   | 63.9 | 19.01 | 31.59 | 49.33  |
| 66125 | 'Sf3b5'         | 120.3 | 67.94 | 68   | 195  | 129  | 186.1 | 89.5 | 112.3 | 109.1 | 115.73 |
| 66126 | 'Elof1'         | 189.3 | 141.4 | 126  | 81.2 | 188  | 208   | 171  | 185.3 | 182.2 | 204.24 |
| 66128 | 'Mrps36'        | 64.85 | 67.79 | 71.7 | 87.8 | 84.6 | 61.6  | 74.9 | 60.4  | 70.56 | 72.95  |
| 66129 | 'Aaed1'         | 6.8   | 7.49  | 3.75 | 1.89 | 6.25 | 18.98 | 14.4 | 4.38  | 10.08 | 9.46   |
| 66131 | 'Tipin'         | 11.58 | 12.73 | 24.2 | 20.9 | 23.3 | 23.32 | 37.2 | 12.22 | 11.15 | 16.67  |
| 66132 | '1110008L16Rik' | 2.37  | 5.92  | 9.02 | 0    | 5.81 | 4.4   | 13.6 | 6.37  | 0     | 4.87   |
| 66136 | 'Znrd1'         | 31.51 | 25.47 | 26.4 | 30.1 | 23.7 | 87.69 | 46   | 26.31 | 19.87 | 30.29  |
| 66138 | 'Bud23'         | 71.33 | 37.79 | 54.9 | 33.8 | 52.6 | 87.09 | 81   | 85.95 | 69.34 | 50.69  |
| 66139 | 'Mymk'          | 0.04  | 6.56  | 7.19 | 0    | 0    | 0     | 0    | 0     | 0     | 3.95   |
| 66140 | 'Ska2'          | 28.41 | 13.59 | 4.9  | 4.22 | 2.71 | 16.34 | 18.5 | 16.2  | 18.39 | 22.19  |
| 66141 | 'Ifitm3'        | 4.06  | 0     | 18.2 | 31.5 | 31.2 | 5.98  | 0.08 | 6.02  | 0.65  | 10.84  |
| 66142 | 'Cox7b'         | 242.1 | 264.9 | 280  | 208  | 207  | 357.8 | 256  | 192.8 | 204.2 | 191.32 |
| 66143 | 'Eef1e1'        | 94.45 | 74.6  | 104  | 105  | 105  | 71.96 | 86.2 | 117.9 | 113.9 | 119.46 |
| 66144 | 'Atp6v1f'       | 782.3 | 696.3 | 627  | 832  | 747  | 1086  | 678  | 773.3 | 888.3 | 897.91 |
| 66146 | 'Maco1'         | 8.93  | 9.22  | 3.23 | 13.1 | 6.69 | 11.29 | 10.9 | 4.54  | 7.74  | 8.3    |
| 66147 | 'Necap2'        | 21.11 | 17.51 | 24.3 | 0    | 15   | 16.88 | 9.7  | 21.45 | 17.5  | 7.04   |
| 66148 | 'Dnajc15'       | 134.3 | 106.7 | 126  | 144  | 89.2 | 167.4 | 42   | 88.5  | 87.99 | 125.55 |
| 66151 | 'Prr13'         | 181.1 | 190.5 | 89.3 | 159  | 201  | 221.9 | 154  | 183.4 | 423.8 | 373.2  |
| 66152 | 'Uqcr10'        | 559.8 | 463.4 | 614  | 714  | 502  | 898.1 | 476  | 385.6 | 606.2 | 386.28 |
| 66153 | 'Fbxo36'        | 16.58 | 9.3   | 2.4  | 10.3 | 8.57 | 4.9   | 5.86 | 4.34  | 9.31  | 8.89   |
| 66154 | 'Tmem14c'       | 43.54 | 77.72 | 49.4 | 54   | 43.3 | 43.41 | 70.8 | 52.57 | 22.64 | 69.52  |
| 66155 | 'Ufc1'          | 113.4 | 91.83 | 114  | 179  | 129  | 54.97 | 99.9 | 122.1 | 99.76 | 107.14 |
| 66156 | 'Anapc11'       | 70.91 | 50.54 | 44.2 | 44.6 | 83.1 | 85.65 | 65.5 | 63.77 | 86.32 | 93.59  |
| 66158 | 'Rtl8a'         | 116.8 | 77.38 | 129  | 90.7 | 115  | 82.08 | 87.9 | 137.8 | 222.4 | 120.98 |
| 66161 | 'Pop4'          | 18.34 | 25.97 | 24.4 | 41.2 | 29.3 | 23.58 | 6.92 | 18.3  | 31.94 | 16.4   |
| 66162 | 'Bola2'         | 100   | 109.3 | 136  | 270  | 89.4 | 193.3 | 153  | 73.3  | 108.1 | 58.15  |
| 66163 | 'Mrpl4'         | 114.1 | 86.83 | 122  | 92.5 | 163  | 120.8 | 174  | 123.2 | 120.3 | 77.49  |
| 66164 | 'Nip7'          | 11.01 | 16.11 | 14.3 | 21.3 | 9.23 | 7.76  | 10.4 | 15.93 | 15.61 | 11.41  |
| 66165 | 'Bccip'         | 68.08 | 111.4 | 70.4 | 84   | 110  | 96.64 | 57.7 | 89.48 | 73.32 | 60.03  |
| 66167 | 'Tma7'          | 285.9 | 300.4 | 286  | 400  | 269  | 409.8 | 363  | 220.2 | 258.8 | 254.81 |
| 66168 | 'Grina'         | 426.1 | 337.9 | 549  | 243  | 433  | 534.3 | 660  | 563.9 | 454.3 | 473.75 |
| 66169 | 'Tomm7'         | 40.39 | 60.83 | 59.8 | 72.9 | 30.3 | 96.16 | 68.5 | 27.69 | 63.95 | 45.37  |
| 66170 | 'Chchd5'        | 12.96 | 15.3  | 6.14 | 27   | 13.8 | 16.84 | 25.3 | 18.62 | 11.14 | 5.75   |
| 66171 | 'Pgls'          | 54.97 | 53.66 | 51.7 | 67.4 | 52.1 | 84.43 | 28.5 | 62.96 | 43.69 | 89.59  |
| 66172 | 'Med11'         | 3.07  | 6.65  | 16.9 | 0    | 17.4 | 7.45  | 9.05 | 19.21 | 32.82 | 28.15  |
| 66174 | 'Nudt14'        | 17.52 | 9.52  | 8.86 | 20.9 | 21.1 | 32.54 | 20.9 | 17.68 | 21.28 | 27.69  |
| 66175 | 'Mustn1'        | 2.27  | 0     | 0    | 0    | 0    | 0.56  | 0    | 0     | 0     | 0      |
| 66176 | 'Nat9'          | 19.94 | 26.6  | 6.81 | 9.76 | 30.5 | 23.04 | 17.5 | 14.05 | 7.71  | 18.07  |
| 66177 | 'Ubl5'          | 263.6 | 262.7 | 267  | 299  | 200  | 303.4 | 274  | 156   | 222.8 | 210.79 |
| 66179 | 'Ogfod3'        | 26.47 | 33.2  | 25.8 | 11.9 | 44.3 | 31.14 | 13.9 | 22.15 | 23.76 | 42.66  |

|       |                 |       |       |      |      |      |       |      |       |       |        |
|-------|-----------------|-------|-------|------|------|------|-------|------|-------|-------|--------|
| 66180 | 'P3h4'          | 11.81 | 38.68 | 31.4 | 52.2 | 14.8 | 26.05 | 0    | 16.92 | 22.28 | 21.68  |
| 66181 | 'Nop10'         | 271.4 | 277.5 | 268  | 176  | 177  | 280.6 | 205  | 181.1 | 199.4 | 205.27 |
| 66183 | 'Sptssb'        | 0     | 4.3   | 0.03 | 0.03 | 2.94 | 0.72  | 0    | 1.04  | 0     | 3.01   |
| 66185 | 'Virma'         | 2.75  | 2.82  | 4.71 | 3.59 | 2.53 | 1.79  | 7.77 | 5.06  | 1.78  | 2.07   |
| 66190 | 'Acer3'         | 4.17  | 6.17  | 12.2 | 7.77 | 5.53 | 5.06  | 3.43 | 4.82  | 8.18  | 10.36  |
| 66191 | 'Ier3ip1'       | 109.5 | 157.7 | 141  | 227  | 138  | 156.8 | 103  | 102.9 | 145.1 | 116.13 |
| 66192 | 'Lage3'         | 23.91 | 13.04 | 17.3 | 21.5 | 16.7 | 19.38 | 33.4 | 20.63 | 21.8  | 33.16  |
| 66193 | 'Pithd1'        | 82.68 | 79.28 | 99.7 | 193  | 74.3 | 84.28 | 72.7 | 57.04 | 108.4 | 31.91  |
| 66194 | 'Pycl'          | 42.29 | 63.67 | 29.4 | 67.3 | 41.7 | 104.5 | 81.8 | 64.73 | 54.23 | 99.15  |
| 66196 | 'Myo19'         | 0.86  | 0     | 2.53 | 0    | 2.04 | 0.21  | 5.1  | 0.48  | 1.99  | 0      |
| 66197 | 'Cks2'          | 0.07  | 2.07  | 3.26 | 0    | 3.03 | 21.38 | 0.08 | 5.45  | 0     | 0      |
| 66199 | 'Commd4'        | 112.5 | 110.9 | 95.5 | 143  | 98.5 | 133.8 | 177  | 146.3 | 86.21 | 143.7  |
| 66200 | 'Commd6'        | 78.77 | 44.63 | 34.5 | 53   | 84   | 72.18 | 41.7 | 55.4  | 23.17 | 67.74  |
| 66201 | 'Vta1'          | 54.38 | 61.26 | 86.8 | 103  | 72.3 | 143.1 | 54.4 | 82.29 | 81.72 | 67.59  |
| 66202 | '1110059G10Rik' | 5.41  | 3.36  | 3.51 | 14.4 | 4.75 | 2.3   | 2.71 | 3.24  | 4.03  | 6.33   |
| 66204 | 'Acyp1'         | 33.71 | 17.09 | 21.4 | 11.5 | 43.2 | 61.17 | 22.3 | 19.8  | 33.44 | 72.47  |
| 66205 | 'Cd302'         | 12.71 | 10.32 | 11.9 | 0    | 0.04 | 11.32 | 19.7 | 7.26  | 7.55  | 4.31   |
| 66206 | '1110059E24Rik' | 45.32 | 53.09 | 55.3 | 78.5 | 79.9 | 101.7 | 41.4 | 42.38 | 58.21 | 51.75  |
| 66208 | 'Nenf'          | 325.9 | 374.3 | 268  | 515  | 171  | 131.9 | 293  | 139.4 | 395.4 | 139.05 |
| 66209 | 'Inip'          | 3.12  | 7.21  | 2.78 | 1.12 | 2.04 | 2.29  | 0.61 | 2.55  | 1.64  | 0.33   |
| 66211 | 'Rpl3l'         | 0     | 1.77  | 0.12 | 0    | 0.06 | 0.06  | 0.05 | 0.07  | 0.06  | 0.04   |
| 66212 | 'Sec61b'        | 208.1 | 216.7 | 139  | 301  | 181  | 169.4 | 127  | 175.2 | 237.8 | 272.39 |
| 66213 | 'Med7'          | 34.05 | 15.77 | 17.4 | 20.1 | 4.41 | 22.73 | 9.68 | 14.9  | 24.24 | 20.18  |
| 66214 | 'Rgcc'          | 8.48  | 23.17 | 24.7 | 0    | 13.4 | 6.5   | 55.3 | 22.97 | 0     | 11.43  |
| 66218 | 'Ndufb9'        | 489.8 | 376.6 | 527  | 713  | 621  | 593   | 617  | 532.8 | 434.3 | 444.39 |
| 66220 | 'Zdhhc12'       | 14.73 | 0.39  | 4.93 | 11.3 | 4.78 | 33.13 | 10.5 | 0     | 5.14  | 21.17  |
| 66222 | 'Serpinb1a'     | 9.78  | 10.85 | 0    | 0    | 1.03 | 0     | 0.21 | 2.05  | 0     | 0      |
| 66223 | 'Mrpl35'        | 16.93 | 15.15 | 23.2 | 26.9 | 10.7 | 5.48  | 11.5 | 21.66 | 19.9  | 18.56  |
| 66225 | 'Llph'          | 27.07 | 17.22 | 27.9 | 22.5 | 81.6 | 48.1  | 40.9 | 53.65 | 54.72 | 30.9   |
| 66226 | 'Trappc2'       | 110   | 122.4 | 93.3 | 116  | 78.1 | 124.1 | 74.9 | 96.95 | 104.8 | 98.93  |
| 66229 | 'Rpl7l1'        | 30.63 | 32.14 | 40.6 | 18.2 | 27.8 | 49.4  | 23.5 | 44.54 | 32.16 | 42.86  |
| 66230 | 'Mrps28'        | 67.99 | 72.93 | 55.5 | 116  | 44.3 | 70.33 | 57.5 | 67.99 | 51.38 | 57.04  |
| 66231 | 'Thoc7'         | 82.99 | 80.71 | 80.4 | 72.2 | 62   | 94.61 | 46.8 | 57.61 | 69.28 | 78.23  |
| 66233 | 'Dmap1'         | 30.74 | 43.83 | 30.3 | 49.7 | 23   | 38.98 | 35.6 | 39.86 | 30.11 | 57.65  |
| 66234 | 'Msmo1'         | 102.3 | 78.6  | 82.1 | 94.8 | 59.4 | 85.02 | 99.9 | 160.6 | 97.66 | 75.92  |
| 66235 | 'Eif1ax'        | 31.51 | 24.2  | 36.5 | 19.9 | 31.8 | 34.89 | 44.8 | 20.39 | 18.73 | 31.88  |
| 66237 | 'Atp6v1g2'      | 349.4 | 386   | 543  | 327  | 591  | 546.9 | 545  | 612.4 | 266.8 | 252    |
| 66240 | 'Kcne1l'        | 9.22  | 2.66  | 0    | 6.61 | 0.03 | 11.88 | 5.97 | 2.05  | 0     | 2.19   |
| 66241 | 'Tmem9'         | 252.9 | 261.1 | 200  | 162  | 243  | 346.9 | 287  | 287.7 | 369.7 | 353.98 |
| 66242 | 'Mrps16'        | 49.26 | 111.3 | 134  | 86.2 | 104  | 144.9 | 107  | 106.9 | 111.7 | 83.88  |
| 66244 | 'Nemf'          | 32.32 | 29.18 | 28.9 | 45.9 | 44.3 | 52.38 | 41.4 | 39.18 | 36.66 | 38.55  |
| 66245 | 'Hspbp1'        | 95.86 | 100.7 | 137  | 110  | 90   | 127.9 | 94.5 | 146.9 | 96.33 | 79.17  |
| 66246 | 'Osgep'         | 31.29 | 27.57 | 32.7 | 16.3 | 57.8 | 44.72 | 52.9 | 34.68 | 16.8  | 59.46  |
| 66248 | 'Alg5'          | 32.44 | 31.55 | 31   | 38.2 | 22.4 | 39.59 | 15.8 | 29.94 | 50.89 | 32.2   |
| 66249 | 'Pno1'          | 21.45 | 10.74 | 13.6 | 24   | 19.1 | 31.01 | 7.5  | 12.77 | 10.82 | 14.27  |
| 66251 | 'Arfgap3'       | 11.9  | 18.36 | 17.9 | 7.53 | 26.9 | 15.71 | 24.1 | 17.99 | 9.06  | 18.34  |
| 66253 | 'Aig1'          | 54.79 | 41.99 | 46.2 | 13.5 | 49.7 | 52.36 | 64.3 | 29.1  | 29.45 | 33.08  |
| 66254 | 'Dimt1'         | 15.47 | 26.3  | 14.2 | 14   | 13.8 | 1.86  | 5.98 | 7.49  | 14.29 | 20.67  |
| 66255 | 'Hsbp11l'       | 1.9   | 1.29  | 3.01 | 0    | 0.68 | 0     | 0    | 0.2   | 0     | 0.83   |
| 66256 | 'Ssr2'          | 116.8 | 109.7 | 98.1 | 128  | 101  | 160.7 | 104  | 177.3 | 200.3 | 175.42 |
| 66257 | 'Nicn1'         | 127.2 | 106.7 | 93.9 | 160  | 126  | 189.4 | 107  | 125.9 | 119   | 143.73 |
| 66258 | 'Mrps17'        | 100.8 | 96.62 | 95.3 | 125  | 95.3 | 145.7 | 97.1 | 101.7 | 65.55 | 101.19 |
| 66259 | 'Camk2n1'       | 15.79 | 8.26  | 10.6 | 11.8 | 19.5 | 6.23  | 14   | 13.11 | 13.65 | 7.31   |
| 66260 | 'Tmem54'        | 0     | 0     | 0    | 0    | 0    | 0     | 0    | 0.11  | 0     | 0      |
| 66262 | 'Ing5'          | 1.02  | 2.8   | 0.63 | 8.99 | 3.98 | 0.03  | 0    | 2.93  | 4.61  | 4.94   |
| 66264 | 'Ccadc28b'      | 19.93 | 16.44 | 23.3 | 14.6 | 31.8 | 42.54 | 21.4 | 19.8  | 43.59 | 30.94  |
| 66266 | 'Eapp'          | 28.21 | 44.18 | 33.3 | 18   | 46.3 | 44.19 | 36.1 | 43.3  | 30.67 | 33.13  |
| 66268 | 'Pigyl'         | 80.32 | 97.6  | 88.8 | 105  | 77.1 | 89.91 | 101  | 107   | 113.8 | 80.8   |

|       |                 |       |       |      |      |      |       |      |       |       |        |
|-------|-----------------|-------|-------|------|------|------|-------|------|-------|-------|--------|
| 66269 | 'Tmed6'         | 0     | 0     | 0    | 0    | 0    | 0     | 0    | 0     | 0.1   | 0      |
| 66270 | 'Retreg1'       | 3.83  | 10.47 | 6.81 | 9    | 5.96 | 8.58  | 5.74 | 2.42  | 1.91  | 6.1    |
| 66271 | 'Tmem126a'      | 96.82 | 101.8 | 79.8 | 71.8 | 99.5 | 102.8 | 72.6 | 89.44 | 104.6 | 134.57 |
| 66272 | 'Cox16'         | 78.47 | 40.13 | 47.7 | 76.3 | 48.2 | 46.38 | 34   | 57.75 | 66.97 | 64.4   |
| 66273 | 'Aamdc'         | 55.82 | 51.34 | 54.2 | 45.2 | 62.4 | 103.4 | 75.6 | 57.88 | 123.3 | 78.89  |
| 66274 | 'Lymr9'         | 18.33 | 13.43 | 17.5 | 2.69 | 11.1 | 13.68 | 17.2 | 14.97 | 16.07 | 12.73  |
| 66276 | '1810009A15Rik' | 91.54 | 68.54 | 47.1 | 81.5 | 87.1 | 111.2 | 43   | 60.98 | 81.6  | 95.81  |
| 66277 | 'Klf15'         | 0.69  | 2.75  | 6.33 | 6.04 | 2.89 | 0.03  | 0    | 4.78  | 6.18  | 0.03   |
| 66278 | 'Smim20'        | 47.62 | 33.85 | 39.9 | 90.8 | 91.2 | 105.8 | 49.8 | 74.48 | 50.26 | 54.6   |
| 66279 | 'Tmem218'       | 13.09 | 4.18  | 12   | 21.9 | 6.19 | 26.26 | 0    | 18.73 | 7.98  | 13.47  |
| 66282 | 'Tma16'         | 4.82  | 7.16  | 7.5  | 12.6 | 7.85 | 5.03  | 8.05 | 14.22 | 6.73  | 6.59   |
| 66286 | 'Sec11c'        | 165.6 | 167.7 | 167  | 203  | 123  | 345.9 | 134  | 219.3 | 169.5 | 213.59 |
| 66290 | 'Atp6v1g1'      | 279   | 248.1 | 248  | 430  | 376  | 316.6 | 231  | 333.7 | 295.4 | 304.05 |
| 66291 | 'Smim8'         | 38.17 | 29.61 | 25.2 | 48.3 | 29.9 | 19.59 | 23.3 | 44.71 | 12.06 | 30.62  |
| 66292 | 'Mrps21'        | 153.4 | 179.1 | 155  | 205  | 151  | 320.1 | 150  | 125.4 | 269.5 | 153.29 |
| 66294 | 'Fam3a'         | 28.89 | 16.95 | 22.6 | 14.2 | 26.8 | 28.51 | 24.5 | 31.48 | 14.41 | 27.25  |
| 66296 | 'Haus2'         | 12.81 | 17.58 | 17.7 | 14.9 | 15.5 | 12.21 | 7.74 | 10.31 | 10.08 | 10.3   |
| 66300 | 'Inafm1'        | 52.72 | 22.8  | 48.3 | 73.4 | 36.6 | 15.93 | 39.2 | 15.01 | 58.12 | 4.17   |
| 66302 | 'Rmdn1'         | 8.02  | 14.03 | 7.56 | 0.85 | 4.77 | 11.33 | 7.82 | 9.46  | 18.51 | 16.1   |
| 66306 | 'Fam53c'        | 9.03  | 2.02  | 11.8 | 2.14 | 8.74 | 2.63  | 11.1 | 5.05  | 5.06  | 10.33  |
| 66307 | 'Isoc1'         | 4.73  | 6.9   | 10.9 | 20.8 | 4.53 | 1.61  | 7.38 | 5.42  | 4.59  | 6.31   |
| 66308 | 'Mplkip'        | 1.61  | 3.02  | 3.33 | 0.4  | 1.26 | 0.76  | 3.62 | 2.97  | 3.98  | 0.95   |
| 66309 | 'Tmem128'       | 58.59 | 29.26 | 45.5 | 24   | 58.8 | 5.26  | 18.3 | 35.45 | 41.51 | 42.07  |
| 66310 | 'Dpy30'         | 130.4 | 135.2 | 123  | 106  | 115  | 124.5 | 135  | 129.3 | 121.1 | 113.08 |
| 66311 | 'Cenpw'         | 1.81  | 1.38  | 0.74 | 0    | 0    | 0     | 0.03 | 0     | 0     | 1.39   |
| 66313 | 'Smurf2'        | 1.55  | 0.1   | 1.74 | 0.66 | 1.25 | 0.03  | 4.5  | 1.81  | 0     | 0.65   |
| 66314 | 'Tpd52l2'       | 58.52 | 55.9  | 73.5 | 36.7 | 48.8 | 61.95 | 83.5 | 48.14 | 46.08 | 50.83  |
| 66315 | 'Senp7'         | 9.25  | 12.02 | 2.05 | 4.98 | 11.1 | 6.32  | 8.7  | 7.68  | 19.36 | 14.09  |
| 66317 | 'Wdr61'         | 107.2 | 84.53 | 68.2 | 103  | 46.9 | 85.2  | 63.5 | 81.29 | 93.02 | 104.72 |
| 66320 | 'Tmem208'       | 79.89 | 72.62 | 98   | 103  | 116  | 80.44 | 99.1 | 60.22 | 79.05 | 49.9   |
| 66323 | '1700001K19Rik' | 0     | 0.21  | 0.73 | 0.69 | 0.11 | 0.5   | 0    | 0     | 0     | 0      |
| 66328 | 'Scp2d1'        | 0.06  | 0     | 0    | 0    | 2.22 | 0     | 0    | 0     | 0.67  | 0.12   |
| 66329 | 'Susd3'         | 0     | 0.17  | 0    | 0    | 4.06 | 34.63 | 0    | 3.79  | 0     | 0      |
| 66333 | 'Aqp11'         | 7.86  | 2.67  | 0.11 | 11.1 | 0.8  | 0.25  | 9.88 | 14.14 | 8.75  | 7.67   |
| 66335 | 'Atp6v1c1'      | 282.3 | 270.2 | 254  | 191  | 239  | 261.8 | 291  | 331.1 | 282   | 320.7  |
| 66336 | 'Cenpp'         | 4.14  | 0     | 3.38 | 2.9  | 3.72 | 2.04  | 0    | 0.96  | 0     | 1.37   |
| 66337 | 'Fam229b'       | 27.36 | 35.43 | 12.5 | 15   | 27.3 | 60.75 | 17   | 11.94 | 24.25 | 49.42  |
| 66338 | 'Cdr4'          | 0     | 0     | 0.14 | 0    | 0    | 0     | 0    | 0     | 0     | 0      |
| 66340 | 'Psenen'        | 214.4 | 259.7 | 197  | 264  | 249  | 355.9 | 317  | 250.9 | 254.4 | 266.55 |
| 66343 | 'Tmem177'       | 9.89  | 0.2   | 2.06 | 0    | 0    | 2.91  | 0.01 | 2.27  | 17.96 | 6.4    |
| 66349 | 'Dmac2'         | 41.37 | 41.11 | 63   | 28.4 | 49.1 | 25.25 | 83.5 | 50.61 | 42.99 | 51.67  |
| 66350 | 'Pla2g12a'      | 13.88 | 17.05 | 7.83 | 50.3 | 6.8  | 4.35  | 11.5 | 8.34  | 16.46 | 7.68   |
| 66352 | 'Blzf1'         | 10.23 | 12.08 | 6.08 | 11.6 | 20.6 | 9.31  | 6.02 | 13.57 | 11.63 | 4.86   |
| 66353 | 'Riid1'         | 35.61 | 23.51 | 11.2 | 84.6 | 30   | 51.66 | 19.5 | 25.56 | 17.56 | 29.06  |
| 66354 | 'Snw1'          | 44.56 | 53.08 | 33.5 | 25.4 | 47.8 | 52.72 | 28.6 | 66.02 | 78.6  | 45.4   |
| 66355 | 'Gmpr'          | 35.89 | 26.75 | 49.8 | 58.3 | 77.1 | 45.2  | 42.3 | 71.25 | 32.42 | 26.3   |
| 66356 | 'Knop1'         | 6.05  | 4.36  | 4.6  | 10.9 | 3.67 | 4.98  | 3.65 | 5.82  | 7.35  | 5.83   |
| 66357 | 'Ostc'          | 187.7 | 161.8 | 92.2 | 127  | 97.5 | 179.9 | 152  | 161.3 | 238.4 | 219.43 |
| 66358 | 'Adprm'         | 20.35 | 6.73  | 11.3 | 15.4 | 11.2 | 12.82 | 10.9 | 12.57 | 6.71  | 9.55   |
| 66359 | 'Cox20'         | 93.95 | 40.16 | 64.2 | 83.1 | 39.9 | 74.12 | 57.5 | 37.19 | 70.58 | 51.3   |
| 66361 | 'Zfand1'        | 7.34  | 2.75  | 21.2 | 0.04 | 30.3 | 23.18 | 24.4 | 31.04 | 20.66 | 10.68  |
| 66362 | 'Exosc3'        | 21.33 | 23.74 | 12.2 | 11.1 | 27.5 | 10.59 | 0.1  | 19.94 | 3.23  | 29.34  |
| 66364 | '2310009A05Rik' | 30.12 | 18.92 | 23.8 | 19.5 | 38.7 | 14.7  | 12.5 | 17.46 | 14.17 | 19.22  |
| 66365 | 'Ccadc90b'      | 11.25 | 7.93  | 9.49 | 16.8 | 23.2 | 13.66 | 3.67 | 9.26  | 20.9  | 17.6   |
| 66366 | 'Ergic3'        | 302.8 | 323.3 | 291  | 299  | 278  | 349   | 228  | 392.6 | 315.1 | 345.62 |
| 66367 | '2310022A10Rik' | 16.3  | 28.41 | 15.9 | 39.7 | 6.37 | 25.38 | 33   | 25.82 | 14.49 | 12.97  |
| 66368 | 'Rtca'          | 68.4  | 60.38 | 65.6 | 75.6 | 84   | 45.99 | 67.9 | 42.53 | 51.52 | 50.06  |
| 66369 | 'Dus2'          | 26.7  | 32.94 | 27.7 | 15.6 | 18.3 | 13.2  | 11.3 | 38.97 | 45.23 | 33.02  |



|       |                 |       |       |      |      |      |       |      |       |       |        |
|-------|-----------------|-------|-------|------|------|------|-------|------|-------|-------|--------|
| 66371 | 'Chmp4c'        | 0     | 0     | 0    | 0    | 0    | 0     | 0.03 | 0     | 0     | 0      |
| 66373 | 'Lsm5'          | 33.83 | 48.3  | 30.9 | 40.7 | 15.9 | 35.35 | 34.7 | 38.53 | 50.33 | 23.82  |
| 66374 | '2310011J03Rik' | 25.67 | 25.11 | 11.3 | 19.6 | 30.1 | 26.11 | 24.6 | 22.33 | 28.02 | 24.52  |
| 66375 | 'Dhrs7'         | 38.32 | 39.62 | 41.2 | 57.8 | 47.4 | 48.47 | 28.2 | 35.49 | 41.99 | 51.32  |
| 66377 | 'Ndufc1'        | 384.2 | 340   | 409  | 488  | 390  | 540.1 | 446  | 282.7 | 387.9 | 352.36 |
| 66379 | 'Cox14'         | 261.7 | 251.5 | 236  | 232  | 193  | 299.8 | 233  | 221.5 | 293.7 | 257.97 |
| 66381 | 'Rnf113a2'      | 29.9  | 21.85 | 25.1 | 44.4 | 23.3 | 33.37 | 8.3  | 22.31 | 10.33 | 12.72  |
| 66383 | 'Iscu'          | 271.9 | 163.4 | 357  | 307  | 188  | 140.8 | 303  | 181.2 | 279.5 | 69.32  |
| 66384 | 'Srp19'         | 182.3 | 180.3 | 125  | 152  | 182  | 176.1 | 138  | 197.5 | 199.5 | 154.22 |
| 66385 | 'Ppp1r7'        | 16.23 | 16.33 | 13.7 | 27.2 | 29.1 | 27.56 | 21.3 | 19.41 | 15.13 | 13.95  |
| 66387 | 'Nudt8'         | 23.75 | 22.95 | 45.9 | 18.4 | 48.8 | 70.01 | 31.5 | 45.72 | 36.5  | 45.14  |
| 66388 | 'Cutc'          | 1.24  | 12.85 | 4.24 | 10.6 | 11.6 | 0.64  | 3.95 | 15.6  | 11.42 | 7.45   |
| 66390 | 'Preli3b'       | 76.99 | 68.68 | 72.8 | 37.4 | 65   | 69.42 | 77.6 | 89.19 | 82.77 | 73.87  |
| 66394 | 'Nosip'         | 47.39 | 50.84 | 35   | 2.88 | 47   | 38.22 | 47.3 | 45.57 | 51.72 | 28.2   |
| 66395 | 'Ahnak'         | 0.11  | 0.07  | 3.45 | 0    | 1.49 | 0.88  | 0.05 | 0     | 0.04  | 0.01   |
| 66396 | 'Ccadc82'       | 19.12 | 22.26 | 28.1 | 47.1 | 17.6 | 15.53 | 21.3 | 19.75 | 36.05 | 28.41  |
| 66397 | 'Sar1b'         | 162.7 | 127.3 | 124  | 113  | 103  | 111.7 | 104  | 151.7 | 120.8 | 131.24 |
| 66398 | 'Commd5'        | 25.16 | 25.23 | 22.5 | 0    | 33.7 | 61.34 | 39.2 | 52.77 | 28.27 | 18.03  |
| 66399 | 'Tsfm'          | 41.3  | 35.09 | 41   | 36.9 | 48.6 | 67.17 | 41.9 | 47.2  | 48.37 | 38.16  |
| 66400 | 'Alkbh7'        | 28.34 | 66.91 | 83.5 | 33.4 | 63.9 | 107.2 | 31.3 | 68.37 | 62.31 | 56.3   |
| 66401 | 'Nudt2'         | 42.42 | 60.77 | 59.4 | 9.7  | 65.9 | 115.5 | 41.4 | 45.12 | 59.75 | 29.78  |
| 66403 | 'Asf1a'         | 12.45 | 4.89  | 4.84 | 8.34 | 8.81 | 3.1   | 2.44 | 0.86  | 2.73  | 3.51   |
| 66404 | 'Rtf2'          | 22.36 | 37.9  | 16.6 | 18.5 | 33.5 | 67.45 | 67.9 | 43.68 | 34.72 | 37.59  |
| 66405 | 'Mcts2'         | 27.01 | 15.83 | 23.5 | 1.51 | 28   | 26.85 | 24.6 | 33.44 | 16.64 | 22.85  |
| 66406 | 'Sac3d1'        | 15.84 | 12.3  | 30.7 | 0    | 9.98 | 15.34 | 11.4 | 22.33 | 11.83 | 6.98   |
| 66407 | 'Mrps15'        | 87.63 | 66.32 | 74.9 | 88.3 | 102  | 106.3 | 99.3 | 74.25 | 69.51 | 85.99  |
| 66408 | 'Aptx'          | 18.41 | 11.15 | 8.01 | 16.2 | 15.5 | 6.1   | 17.2 | 9.12  | 21.57 | 11.82  |
| 66409 | 'Rsl1d1'        | 55.92 | 95.23 | 70   | 83.2 | 57.6 | 101.9 | 51.9 | 81.35 | 66.69 | 89.27  |
| 66410 | 'Mterf3'        | 20.32 | 32.81 | 11.7 | 11   | 19.1 | 19.05 | 37.4 | 22.45 | 22.83 | 31.39  |
| 66411 | 'Tbcb'          | 226.3 | 224   | 218  | 204  | 214  | 280.7 | 234  | 239.8 | 233.3 | 200.79 |
| 66412 | 'Arrdc4'        | 2.03  | 1.17  | 7.73 | 38.5 | 7.64 | 0.09  | 6.34 | 7.54  | 7.5   | 0      |
| 66413 | 'Psm6'          | 110.9 | 113.4 | 156  | 104  | 86.2 | 160.4 | 127  | 157   | 113.5 | 117.96 |
| 66414 | 'Ndufa12'       | 516.9 | 450.3 | 418  | 630  | 604  | 772.9 | 575  | 479.2 | 470.3 | 555.2  |
| 66416 | 'Ndufa7'        | 405.4 | 348.1 | 429  | 588  | 382  | 632.7 | 377  | 391.5 | 641.9 | 485.08 |
| 66419 | 'Mrpl11'        | 29.75 | 25.27 | 33.6 | 44.4 | 38.1 | 45.78 | 26.6 | 32.05 | 15.96 | 23.92  |
| 66420 | 'Polr2e'        | 146   | 121.8 | 99.1 | 115  | 162  | 164.8 | 138  | 162.1 | 132.4 | 108.35 |
| 66421 | '2410004B18Rik' | 64.84 | 44.63 | 40.4 | 50.9 | 45.2 | 36.62 | 26.3 | 40.15 | 50.24 | 22.64  |
| 66422 | 'Dctpp1'        | 11.79 | 2.37  | 14.9 | 16.5 | 27   | 41.59 | 12.7 | 6.79  | 13.35 | 5.78   |
| 66423 | 'Coprs'         | 248.3 | 186.9 | 225  | 176  | 187  | 303.6 | 222  | 125.3 | 240.3 | 99.04  |
| 66425 | 'Pcp4l1'        | 7.67  | 22.69 | 33.6 | 32.3 | 35.4 | 9.18  | 16.3 | 65.14 | 19.7  | 8.32   |
| 66427 | 'Cyb5b'         | 56.43 | 41.66 | 45   | 31.6 | 36.1 | 12.05 | 44   | 63.84 | 41.74 | 44.31  |
| 66431 | 'Oxld1'         | 9.44  | 25.59 | 13.5 | 17   | 17.6 | 0     | 22.9 | 1.36  | 12.97 | 22.47  |
| 66432 | 'Slc7a6os'      | 13.43 | 13.66 | 12.1 | 22.4 | 4.94 | 2.88  | 1.06 | 5.63  | 20.22 | 11.75  |
| 66433 | 'Chchd7'        | 56.5  | 82.93 | 109  | 52.7 | 66.1 | 108.4 | 77.4 | 38.77 | 48.37 | 77.94  |
| 66435 | 'Uggt2'         | 3.27  | 5.74  | 5.65 | 0.83 | 3.72 | 9.35  | 4.4  | 7.77  | 7.33  | 5.56   |
| 66437 | 'Fis1'          | 427.8 | 355.6 | 308  | 447  | 383  | 492   | 361  | 366.5 | 273.9 | 442.56 |
| 66439 | 'Borcs7'        | 26.59 | 34.67 | 33.6 | 39.5 | 31.5 | 34.08 | 46.8 | 28.95 | 26.15 | 33.3   |
| 66440 | 'Cdc26'         | 59.83 | 87.93 | 59.8 | 71   | 73.6 | 71.71 | 84.8 | 98.58 | 86    | 128.26 |
| 66441 | 'Magohb'        | 13.53 | 11.27 | 9.24 | 3.48 | 31   | 10.37 | 4.29 | 21.44 | 13.67 | 6.28   |
| 66442 | 'Spc25'         | 0     | 3.08  | 0    | 0    | 0    | 0     | 0    | 0     | 0     | 0      |
| 66443 | 'Tnfaip8l1'     | 0     | 2.89  | 0    | 0    | 0    | 0     | 0    | 2.45  | 0     | 3.7    |
| 66445 | 'Cyc1'          | 311.9 | 210   | 349  | 312  | 267  | 307.3 | 351  | 351.2 | 183.2 | 244.44 |
| 66446 | 'Exosc7'        | 65.52 | 84.04 | 43.7 | 56.7 | 56.7 | 101.8 | 57.3 | 88.06 | 98.65 | 90.39  |
| 66447 | 'Mgst3'         | 135.5 | 80.92 | 310  | 215  | 376  | 310.8 | 114  | 245.8 | 157.3 | 173.17 |
| 66448 | 'Mrpl20'        | 236.3 | 227.1 | 217  | 201  | 243  | 306.8 | 139  | 282.2 | 181.9 | 201.84 |
| 66449 | 'Pam16'         | 300.3 | 222.1 | 244  | 181  | 185  | 447   | 248  | 237.1 | 348.1 | 299.93 |
| 66454 | 'Nmnat1'        | 4.5   | 7.73  | 8.9  | 0    | 12.2 | 3.16  | 0.16 | 9.78  | 0     | 6.69   |
| 66455 | 'Cnpy4'         | 18.64 | 15.46 | 6.87 | 3.86 | 13.5 | 16.12 | 7.77 | 16.19 | 15.22 | 20.2   |

|        |                 |       |       |      |      |      |       |      |       |       |        |
|--------|-----------------|-------|-------|------|------|------|-------|------|-------|-------|--------|
| 66459  | 'Pyurf'         | 16.22 | 9.73  | 11.3 | 7.17 | 10.6 | 12.22 | 9.18 | 18.26 | 12.24 | 14.22  |
| 66460  | 'Sys1'          | 48.5  | 63.1  | 92.8 | 37   | 44.7 | 39.87 | 71.5 | 26.17 | 68.84 | 32.21  |
| 66461  | 'Ptpmt1'        | 24.93 | 11.17 | 5.05 | 19.3 | 16.7 | 18.96 | 29   | 17.39 | 22.82 | 17.12  |
| 66462  | 'Rex1bd'        | 108.4 | 107.4 | 115  | 138  | 135  | 104.8 | 103  | 123.4 | 131.5 | 162.3  |
| 66464  | 'Taf12'         | 24.11 | 23.18 | 25.9 | 14.5 | 35.7 | 26.21 | 25.5 | 24.49 | 24.79 | 26.77  |
| 66467  | 'Gtf2h5'        | 119   | 123.5 | 82.5 | 102  | 112  | 133.7 | 125  | 113.7 | 126.5 | 134.18 |
| 66468  | 'Ska1'          | 0     | 0.02  | 0    | 0    | 0    | 0     | 0    | 0     | 0     | 0      |
| 66469  | 'Fam213b'       | 171.3 | 131.1 | 193  | 248  | 305  | 200.5 | 183  | 143   | 165.9 | 239.96 |
| 66471  | 'Anp32e'        | 30.39 | 41.3  | 23.2 | 31.1 | 36   | 35.52 | 31.8 | 10.85 | 41.94 | 29.84  |
| 66473  | 'Ctrb1'         | 0     | 0     | 0.34 | 0    | 0    | 0     | 0    | 0     | 0     | 0      |
| 66475  | 'Rps23'         | 276.3 | 317.1 | 250  | 270  | 232  | 266   | 243  | 154.9 | 251.1 | 237.83 |
| 66477  | 'Usmg5'         | 828.8 | 1231  | 1220 | 1413 | 766  | 2002  | 1095 | 574.1 | 1279  | 682.59 |
| 664799 | 'Ctcf1'         | 0.38  | 0.78  | 0.79 | 1.31 | 1.07 | 0.93  | 0.85 | 0.35  | 0.78  | 0.41   |
| 66480  | 'Rpl15'         | 289.5 | 378.7 | 229  | 440  | 250  | 243.8 | 181  | 217.6 | 200.2 | 232.87 |
| 664804 | 'Gm7347'        | 0     | 0     | 0    | 0    | 0    | 0     | 0    | 0.48  | 0     | 0.68   |
| 66481  | 'Rps21'         | 111.3 | 167.9 | 164  | 320  | 79   | 265   | 158  | 79.26 | 188   | 103.19 |
| 66482  | 'Exoc2'         | 11.05 | 9.38  | 21.4 | 10.1 | 8.03 | 0.9   | 12.6 | 12.33 | 16.91 | 20.41  |
| 66483  | 'Rpl36a1'       | 234.9 | 333.4 | 243  | 271  | 221  | 269.9 | 276  | 186.6 | 292   | 283.94 |
| 664837 | 'Gm7361'        | 0     | 0     | 0    | 0    | 0    | 0.01  | 0    | 0.17  | 0     | 0.25   |
| 66487  | 'Smim4'         | 21.67 | 24.82 | 18.8 | 29.2 | 24.7 | 47.44 | 14.7 | 9.38  | 36.68 | 32.81  |
| 66488  | 'Fam136a'       | 66.89 | 61.46 | 45.7 | 24.3 | 49   | 73.63 | 40.4 | 67.56 | 67.17 | 41.27  |
| 664883 | 'Nova1'         | 16.33 | 11.58 | 26.1 | 7.8  | 9.38 | 9.66  | 24   | 15.37 | 21.12 | 7.53   |
| 66489  | 'Rpl35'         | 547.6 | 444.5 | 489  | 914  | 415  | 727   | 568  | 297.1 | 500.1 | 397.01 |
| 66491  | 'Polr2l'        | 46.85 | 46.67 | 45.4 | 52.9 | 52.9 | 70.42 | 37.1 | 35.87 | 38.51 | 39.68  |
| 66492  | 'Zmat2'         | 101.6 | 78.22 | 84.3 | 71.3 | 72.9 | 102.4 | 78.8 | 63.58 | 62.83 | 47.6   |
| 66493  | 'Mrpl51'        | 88.2  | 59.1  | 61   | 86.7 | 68.2 | 85.34 | 57   | 64.84 | 66.46 | 68.24  |
| 66494  | 'Preli1'        | 307.9 | 202.7 | 225  | 174  | 190  | 243.6 | 232  | 222.4 | 188.8 | 147.97 |
| 66495  | 'Ndufb3'        | 246.2 | 225.2 | 277  | 233  | 279  | 359.9 | 212  | 175   | 248.5 | 224.2  |
| 66496  | 'Ppdpf'         | 154   | 130.6 | 130  | 175  | 100  | 103   | 194  | 97.52 | 112.5 | 158.42 |
| 664968 | 'Tmem238'       | 0.26  | 0.28  | 0    | 3.43 | 0.1  | 0     | 0    | 0.83  | 0     | 2.23   |
| 664969 | 'Gm7429'        | 0     | 0     | 0.56 | 0.14 | 0.26 | 0.11  | 0    | 0     | 0     | 0      |
| 66497  | 'Cmss1'         | 23.93 | 14.7  | 18.9 | 22.1 | 9.48 | 10.48 | 11.9 | 15.06 | 13.62 | 26.56  |
| 66498  | 'Dda1'          | 120.5 | 103.4 | 97   | 148  | 139  | 157.7 | 140  | 110   | 165.6 | 137.42 |
| 664994 | 'Isoc2a'        | 0     | 0     | 0    | 0    | 0.05 | 0     | 3.74 | 1.64  | 0     | 0      |
| 66500  | 'Slc30a7'       | 2.57  | 1.08  | 0.41 | 1.05 | 2.96 | 0.54  | 17.6 | 0.02  | 1.95  | 1.54   |
| 665001 | 'Gm14391'       | 22.52 | 32.66 | 13.5 | 17.3 | 31.7 | 32.25 | 27.4 | 21.85 | 22.25 | 17.09  |
| 66501  | '1700029H14Rik' | 0     | 0.45  | 0    | 0    | 0    | 0     | 0    | 0     | 0     | 0      |
| 665033 | 'Col6a5'        | 0.43  | 3.12  | 0    | 0.01 | 0    | 0     | 0.06 | 0.15  | 0.57  | 0      |
| 66505  | 'Zmynd11'       | 18.87 | 26.19 | 31.4 | 26.3 | 25.1 | 13.02 | 23.8 | 16.8  | 20.95 | 20.69  |
| 66506  | 'Psmg3'         | 38.41 | 45.84 | 31.5 | 22.6 | 56.2 | 36.55 | 73.2 | 30.31 | 29.25 | 46.96  |
| 66508  | 'Lamtor1'       | 104.3 | 51.96 | 104  | 124  | 81.8 | 76.03 | 109  | 58.25 | 57.97 | 78.61  |
| 665095 | 'Cyp2j8'        | 1.91  | 0     | 0    | 0    | 0    | 0     | 0    | 0     | 0     | 0      |
| 66510  | 'Rnf181'        | 145.1 | 107.5 | 137  | 180  | 152  | 93.63 | 120  | 136.2 | 113   | 146.35 |
| 66511  | 'Chtop'         | 64.22 | 83.97 | 69.9 | 58.9 | 56.9 | 60.88 | 50.4 | 56.04 | 39.5  | 51.89  |
| 665113 | 'Tnik'          | 13.5  | 17.09 | 16.1 | 18.9 | 26.4 | 13.84 | 11.7 | 18.54 | 20.28 | 11.1   |
| 665119 | 'Sec14l5'       | 1.22  | 0.57  | 0    | 0    | 0.21 | 0     | 0    | 0     | 0     | 0.57   |
| 66513  | 'Tab1'          | 16.16 | 13.61 | 14.3 | 0    | 11.6 | 12.18 | 6.32 | 4.64  | 33.87 | 4.39   |
| 66514  | 'Asrgl1'        | 38.75 | 21.77 | 33.8 | 35.3 | 24.8 | 28.7  | 47.9 | 22.04 | 43.62 | 27.21  |
| 66515  | 'Cul7'          | 4.24  | 5.65  | 13   | 1.43 | 3.1  | 1.28  | 9.51 | 0.67  | 3.44  | 6.74   |
| 665155 | 'Srp54b'        | 44.97 | 53.21 | 56.6 | 37.2 | 34.9 | 47.37 | 39.7 | 61.39 | 65.38 | 59.24  |
| 665180 | 'Clec2l'        | 5.77  | 10.99 | 10.5 | 6.45 | 18.6 | 4.97  | 4.62 | 10.52 | 8.79  | 8.37   |
| 66521  | 'Rwdd1'         | 78.94 | 75.84 | 64.4 | 48.3 | 67.5 | 75.01 | 57.2 | 65.27 | 72.14 | 63.28  |
| 665211 | 'Gm14326'       | 22.39 | 23.26 | 38.4 | 35.5 | 38.4 | 43.72 | 5.98 | 32.15 | 20.93 | 26.3   |
| 66522  | 'Pgpep1'        | 7     | 7.78  | 5.67 | 0.03 | 3.78 | 0.13  | 1.5  | 6.05  | 4.29  | 4.57   |
| 66523  | '2810004N23Rik' | 32.66 | 10.53 | 19.6 | 22.3 | 22.7 | 41.98 | 38.3 | 11.75 | 13.91 | 23.83  |
| 66525  | 'Timm50'        | 68.76 | 88.09 | 74.6 | 76.1 | 68.7 | 94.34 | 49.2 | 55.08 | 61.69 | 83.08  |
| 665255 | 'Vmn2r28'       | 0     | 0     | 0.05 | 0    | 0    | 0     | 0    | 0     | 0     | 0      |
| 66526  | 'Tceanc2'       | 10.9  | 7.97  | 0.57 | 10.6 | 6.13 | 5.47  | 2.24 | 9.2   | 10.02 | 2.43   |

|        |              |       |       |      |      |      |       |      |       |       |        |
|--------|--------------|-------|-------|------|------|------|-------|------|-------|-------|--------|
| 66528  | 'Smim5'      | 0     | 0.11  | 0.06 | 0    | 7.72 | 0     | 0    | 2.72  | 0.05  | 0.05   |
| 66530  | 'Ubxn6'      | 71.18 | 57.8  | 51.4 | 58.5 | 42.8 | 64.89 | 66   | 46.69 | 45.06 | 85.92  |
| 66531  | 'Cmc2'       | 10.73 | 10.18 | 15.2 | 17.1 | 19   | 18.6  | 0.85 | 17.34 | 22.15 | 11.13  |
| 66532  | 'Rep15'      | 0     | 0     | 2.9  | 0    | 0.05 | 0     | 0    | 0     | 0.41  | 0      |
| 66536  | 'Nipsnap3b'  | 23.48 | 36.51 | 28.9 | 35.8 | 19.8 | 41.84 | 34.2 | 45.5  | 25.31 | 39.35  |
| 66537  | 'Pomp'       | 380.4 | 272.7 | 283  | 405  | 265  | 362.3 | 279  | 409.1 | 427.6 | 395.07 |
| 665378 | 'Gm7609'     | 0.96  | 1.13  | 1.1  | 0.57 | 1.29 | 0.68  | 0.56 | 0.47  | 1.01  | 0.82   |
| 66538  | 'Rps19bp1'   | 54.9  | 48.2  | 33.3 | 48.7 | 64.5 | 102.6 | 33.1 | 44.86 | 53.79 | 27.17  |
| 66540  | 'Fam107b'    | 0     | 0     | 1.67 | 4.36 | 1.67 | 0.38  | 0    | 0     | 3.57  | 0.05   |
| 66541  | 'Immp11'     | 50.56 | 57.22 | 28.7 | 56.9 | 58.1 | 12.8  | 89.1 | 67.18 | 34.02 | 58.54  |
| 665433 | 'Hist1h2ao'  | 16.31 | 26.46 | 2.4  | 42.8 | 0    | 25.05 | 21.9 | 7.17  | 5.44  | 5.48   |
| 66548  | 'Adamtsl5'   | 0     | 0     | 0.05 | 0    | 0.12 | 0.06  | 0    | 0     | 0     | 0      |
| 66549  | 'Aggf1'      | 9.69  | 2.44  | 6.43 | 25   | 7.99 | 3.97  | 9.14 | 0.51  | 8.35  | 2      |
| 66552  | 'Sppl2a'     | 5.09  | 4.34  | 10.8 | 1.51 | 2.9  | 6.86  | 5.39 | 5.65  | 9.05  | 15.41  |
| 66556  | 'Drap1'      | 51.15 | 39.91 | 44.3 | 72.4 | 44.2 | 41.71 | 21.5 | 37.23 | 23.55 | 21.19  |
| 665562 | 'Rpl31-ps12' | 1.73  | 11.43 | 1.76 | 40.6 | 1.17 | 7.83  | 0.56 | 1.05  | 0.86  | 1.54   |
| 665563 | 'Mthfd2l'    | 8.31  | 5.71  | 4.96 | 1.18 | 4.08 | 1.08  | 3.13 | 2.94  | 6.22  | 2.49   |
| 665574 | 'Gm7694'     | 1.47  | 1.95  | 4.64 | 0    | 0    | 0     | 0    | 0     | 0     | 0      |
| 66559  | 'Metap1d'    | 45    | 26.04 | 8.64 | 10.6 | 32   | 23.78 | 23.4 | 25.52 | 15.77 | 18.82  |
| 665596 | 'Hist1h2bq'  | 1.63  | 0     | 0    | 0    | 3.12 | 0     | 2.37 | 0.59  | 0.65  | 0      |
| 665622 | 'Hist1h2br'  | 1.63  | 0     | 0    | 0    | 3.12 | 0     | 2.37 | 0.59  | 0.65  | 0      |
| 66566  | 'Ntpcr'      | 36.74 | 34.22 | 30.2 | 65.6 | 61.6 | 46.1  | 28.4 | 56.22 | 40.9  | 44.89  |
| 66568  | 'Rwdd3'      | 11.99 | 8.66  | 11.6 | 35.9 | 13.3 | 9.6   | 8.74 | 18.39 | 10.81 | 21.72  |
| 665687 | 'Gm20777'    | 0     | 0     | 0    | 0    | 0    | 0.01  | 0    | 0     | 0     | 0      |
| 66569  | 'Gdpd1'      | 81.99 | 61.84 | 70.7 | 34.7 | 64.1 | 49.8  | 35.8 | 59.59 | 45.61 | 70.73  |
| 66570  | 'Cenpm'      | 2.97  | 2.13  | 0.12 | 0    | 12.4 | 4.67  | 1.92 | 0     | 0.05  | 5.28   |
| 665700 | 'Hmcn2'      | 0     | 0.39  | 0    | 0.01 | 0    | 0     | 0    | 0     | 0     | 0.01   |
| 66573  | 'Dzip1'      | 17.35 | 10.2  | 14.7 | 10.8 | 9.04 | 4.81  | 15.4 | 9.11  | 11.29 | 10.61  |
| 665738 | 'Gm7762'     | 0     | 0     | 0    | 0    | 0    | 0.02  | 0    | 0     | 0     | 0      |
| 665755 | 'LOC665755'  | 0     | 0     | 0.03 | 0    | 0    | 0     | 0    | 0     | 0     | 0      |
| 66576  | 'Uqcrh'      | 513.5 | 503.3 | 627  | 586  | 564  | 593.2 | 564  | 382.1 | 375.7 | 458.26 |
| 665775 | 'Bod1l'      | 2.96  | 4.4   | 4.93 | 9.95 | 7.7  | 3.75  | 3.63 | 3.52  | 5.31  | 5.42   |
| 66578  | 'Mis18a'     | 2.98  | 2.45  | 3.02 | 16.8 | 1.43 | 0     | 0    | 3.59  | 0     | 0      |
| 66580  | 'Esf1'       | 9.61  | 14.98 | 10.8 | 13   | 8.09 | 10.15 | 14.3 | 5.35  | 2.99  | 7.28   |
| 66583  | 'Exosc1'     | 13.42 | 15.54 | 10.6 | 21.5 | 24.5 | 22.11 | 13.2 | 19.47 | 28.33 | 21.3   |
| 66585  | 'Snrrp40'    | 40.57 | 37.99 | 35.7 | 28.6 | 52   | 77.5  | 13.3 | 48.97 | 19.19 | 34.26  |
| 665858 | 'Gm7827'     | 0     | 0     | 0    | 0    | 0.02 | 0.76  | 0.04 | 0.01  | 0.05  | 0      |
| 66586  | 'Crls1'      | 5.63  | 1.74  | 3.04 | 0.11 | 5.78 | 3.09  | 0.92 | 3.27  | 4.79  | 1.45   |
| 66587  | 'Fastk'      | 18.8  | 20.96 | 19.3 | 16.7 | 43   | 14    | 45.8 | 43.85 | 42.77 | 40.95  |
| 66588  | 'Cmpk1'      | 44.51 | 52.71 | 53.2 | 53.1 | 69.6 | 47.62 | 41.4 | 70.37 | 67.01 | 57.8   |
| 66589  | 'Ube2v1'     | 232.7 | 255.9 | 161  | 240  | 256  | 278.4 | 339  | 356.5 | 354   | 310.01 |
| 66590  | 'Farsa'      | 35.87 | 24.43 | 41   | 64.4 | 39.7 | 55.08 | 32   | 28.76 | 44.26 | 29.83  |
| 66591  | 'Mad2l1bp'   | 9.5   | 6.59  | 3.9  | 12.1 | 36.1 | 12.98 | 2.21 | 13.63 | 15.08 | 8.06   |
| 66592  | 'Stoml2'     | 69.99 | 71.18 | 56.2 | 28.5 | 77.2 | 92.13 | 38.6 | 70.96 | 79.71 | 99.36  |
| 66593  | 'Diablo'     | 42.74 | 21.43 | 14.9 | 19.6 | 20   | 14.33 | 20   | 11.45 | 26.55 | 27.46  |
| 66594  | 'Uqcr11'     | 699.2 | 497.7 | 720  | 764  | 714  | 1206  | 673  | 624.2 | 833.4 | 674.92 |
| 66595  | 'Aste1'      | 9.4   | 8.28  | 6.13 | 12.9 | 4.03 | 4.31  | 4.04 | 6.77  | 5.1   | 7.66   |
| 66596  | 'Gtf3a'      | 34.82 | 39.61 | 37.8 | 79.2 | 6.09 | 45.55 | 27.5 | 46.96 | 63.89 | 88.69  |
| 66597  | 'Trim13'     | 5     | 5.29  | 0.03 | 14.6 | 6.49 | 6.7   | 7.34 | 8.53  | 0     | 10.84  |
| 66598  | '66598'      | 0.97  | 0     | 10   | 0    | 5.89 | 6.93  | 5.4  | 12.12 | 3.87  | 0      |
| 66599  | 'Rdm1'       | 17.3  | 11.47 | 32.7 | 36   | 6.38 | 19.82 | 8.52 | 9.72  | 26.85 | 18.62  |
| 66603  | 'Gemin2'     | 16.72 | 8.22  | 6.45 | 0.15 | 7.79 | 9.76  | 6.41 | 4.17  | 8.67  | 4.61   |
| 666048 | 'Trabd2b'    | 0.01  | 0.02  | 0.02 | 0.01 | 0.02 | 0.02  | 0.02 | 0     | 0     | 0.01   |
| 66606  | 'Lrrc57'     | 10.01 | 15.69 | 8.1  | 14.5 | 11.6 | 5.1   | 27.4 | 20.93 | 11.43 | 11.03  |
| 666060 | 'Frmppd1'    | 0.74  | 0     | 2.88 | 0    | 0    | 0     | 3.94 | 1.91  | 0.24  | 0      |
| 66609  | 'Cryzl1'     | 61.5  | 65.74 | 44.3 | 37   | 83.8 | 113.7 | 65   | 66.55 | 59.93 | 92.43  |
| 66610  | 'Abi3'       | 4.55  | 0     | 0    | 0    | 0.05 | 3.69  | 0    | 0.02  | 1.78  | 0      |
| 66611  | 'Ribc1'      | 0     | 0     | 0    | 0    | 0    | 0     | 1.23 | 0     | 0     | 0      |

|        |            |       |       |      |      |      |       |      |       |       |        |
|--------|------------|-------|-------|------|------|------|-------|------|-------|-------|--------|
| 66612  | 'Ormdl3'   | 88.41 | 108.1 | 60.9 | 92.3 | 103  | 63.3  | 72.6 | 115.3 | 82.34 | 103.21 |
| 66614  | 'Gpatch4'  | 9.55  | 11.9  | 15.6 | 16.9 | 15.8 | 35.91 | 27.9 | 18.06 | 20.21 | 17.85  |
| 66615  | 'Atg4b'    | 65.59 | 56.38 | 34.4 | 40.9 | 44.5 | 67.38 | 45.8 | 37.1  | 27.11 | 60.17  |
| 66616  | 'Snx9'     | 0.03  | 1.07  | 0    | 8.06 | 1.36 | 0.04  | 5.17 | 5.16  | 0     | 1.89   |
| 666168 | 'Cyp4a31'  | 0.02  | 0.02  | 0    | 0    | 0    | 0     | 0.02 | 0     | 0     | 0.02   |
| 66617  | 'Ntmt1'    | 88.81 | 65.95 | 51.9 | 57.3 | 78.2 | 58.23 | 43.8 | 88.93 | 52.24 | 85.2   |
| 666173 | 'Vps13b'   | 0.95  | 3.57  | 3.7  | 6.37 | 2.09 | 1.58  | 8.02 | 2.88  | 2.83  | 3.17   |
| 66618  | 'Snrrp27'  | 84.9  | 83.7  | 51.7 | 70   | 63.9 | 68.31 | 56.2 | 66.33 | 56.89 | 47.46  |
| 666190 | 'Gm7972'   | 0     | 0     | 0.01 | 0.01 | 0    | 0.11  | 0    | 0.23  | 0.01  | 0      |
| 666209 | 'Gm7982'   | 0     | 0     | 0    | 0    | 0    | 0     | 0    | 0     | 0.01  | 0      |
| 66622  | 'Ubr7'     | 6.43  | 6.03  | 4.25 | 4.2  | 7.22 | 6.58  | 0.05 | 11.49 | 0.05  | 5.61   |
| 66624  | 'Spcs2'    | 286.5 | 240.1 | 165  | 345  | 209  | 332.4 | 184  | 300.6 | 288.3 | 324.73 |
| 666244 | 'Tmsb15b1' | 3.65  | 10.74 | 16.7 | 8.76 | 13.6 | 0.5   | 7.33 | 1.05  | 0     | 2.71   |
| 66625  | 'Pnir'     | 39.05 | 43.24 | 36.2 | 57.8 | 49.6 | 51.51 | 43.8 | 38.04 | 40.95 | 46.78  |
| 666253 | 'Gm8005'   | 0     | 0     | 0.53 | 0    | 1.07 | 0     | 0    | 0     | 0     | 0      |
| 66626  | 'Cdipl1'   | 170.2 | 237.5 | 259  | 125  | 157  | 195.3 | 129  | 208.5 | 235.3 | 214.13 |
| 66627  | 'Ogfod2'   | 47.11 | 35.38 | 19.3 | 36.6 | 36.5 | 57.37 | 43.1 | 29.31 | 28.76 | 55.81  |
| 66628  | 'Thg1l'    | 3.6   | 4.91  | 3.33 | 0    | 8.93 | 2.21  | 0.02 | 3.38  | 11.55 | 0.65   |
| 66629  | 'Golp3'    | 15.39 | 10.27 | 17.6 | 22.1 | 4.99 | 12.17 | 9.84 | 4.18  | 6.91  | 8.31   |
| 66631  | 'Mfsd14b'  | 17    | 12.15 | 13.6 | 11.7 | 20.7 | 6.59  | 24   | 13.98 | 18.57 | 15.48  |
| 666311 | 'Zscan25'  | 0.09  | 0.09  | 0.05 | 0    | 0.77 | 0.05  | 0.08 | 0     | 0     | 0.13   |
| 66632  | 'Dph6'     | 18.4  | 25.09 | 15.7 | 32.8 | 15.9 | 8.23  | 13.2 | 27.92 | 17.39 | 15.86  |
| 666329 | 'Gm3317'   | 5     | 8.04  | 11.5 | 0    | 2.52 | 1.83  | 2.49 | 6.88  | 2.87  | 3.38   |
| 66634  | 'Mcm8'     | 0.6   | 1.21  | 0.46 | 1.92 | 0.02 | 1.08  | 0.08 | 2.03  | 0.06  | 0.12   |
| 666348 | 'Apol7e'   | 0.1   | 0.02  | 0    | 0.03 | 0.02 | 0     | 0.09 | 0     | 0     | 0.01   |
| 66637  | 'Tsen15'   | 38.6  | 50.84 | 49   | 21.1 | 63.7 | 44.04 | 46.9 | 41.78 | 19.44 | 52.22  |
| 66641  | 'Sike1'    | 8.05  | 9.34  | 3.27 | 4.78 | 5.29 | 4.48  | 5.24 | 8.24  | 4.02  | 9.06   |
| 66642  | 'Ctnnb1'   | 31.19 | 37.41 | 13.5 | 45.4 | 55.5 | 15.4  | 23.5 | 41.43 | 8.63  | 19.99  |
| 666420 | 'Gm8094'   | 0     | 1.01  | 0.55 | 0    | 1.77 | 0     | 3.28 | 0     | 0     | 0      |
| 66643  | 'Lix1'     | 21.63 | 5.07  | 7.55 | 6.26 | 13.8 | 14.78 | 5.15 | 3.21  | 2.29  | 2.32   |
| 66645  | 'Pspc1'    | 11.93 | 22.29 | 22.5 | 16.9 | 33.8 | 48.36 | 22.7 | 37.99 | 21.61 | 31.78  |
| 66646  | 'Rpe'      | 2.42  | 6.97  | 8.51 | 11.7 | 14.2 | 12.22 | 6.43 | 7.87  | 12.31 | 4.45   |
| 666468 | 'Atg4a'    | 1.48  | 8.99  | 5.24 | 4.75 | 0.68 | 7.17  | 0.21 | 1.87  | 0.04  | 0.83   |
| 66647  | 'Nsmce3'   | 29.44 | 11.06 | 10   | 29.3 | 14.5 | 15.11 | 26.3 | 5.28  | 7.16  | 4.49   |
| 66648  | 'Tpgs2'    | 21.47 | 23    | 13.2 | 27.7 | 16.3 | 11.24 | 4.12 | 18.73 | 23.44 | 12.79  |
| 666485 | 'Gm8127'   | 0     | 0     | 0.1  | 0    | 0.06 | 0     | 0    | 0     | 0     | 0      |
| 666528 | 'Zfp541'   | 0     | 0.32  | 0    | 0    | 0    | 0     | 1.85 | 0     | 0.24  | 0      |
| 66653  | 'Brf2'     | 3.47  | 4.19  | 5.08 | 2.93 | 6.36 | 5.43  | 4.36 | 4.09  | 2.09  | 4.46   |
| 666532 | 'Zfp991'   | 1.43  | 0     | 0    | 0.16 | 0.84 | 2.92  | 0    | 0.06  | 0.9   | 1.7    |
| 66656  | 'Eef1d'    | 44.22 | 64.83 | 63   | 52.9 | 50.4 | 78.52 | 119  | 63.63 | 63.91 | 68.34  |
| 666561 | 'Gm8165'   | 0     | 0     | 0.16 | 0    | 0.62 | 0     | 0    | 0     | 0     | 0      |
| 66658  | 'Ccdc51'   | 3.75  | 2.04  | 8.59 | 6.51 | 0    | 2.88  | 0.64 | 1.9   | 0     | 0      |
| 666584 | 'BC024063' | 0     | 0     | 2.5  | 0    | 2.27 | 2.26  | 0    | 7.3   | 2.56  | 0      |
| 66659  | 'Acp6'     | 31.33 | 8.11  | 7.09 | 26.8 | 8.63 | 8.37  | 0    | 8.17  | 13.55 | 11.35  |
| 66660  | 'Sltm'     | 9.32  | 22.45 | 21.5 | 37.5 | 24.2 | 23.62 | 23.2 | 15.37 | 16.63 | 14.99  |
| 66661  | 'Srp72'    | 26.07 | 29.15 | 29   | 34.4 | 30.6 | 23.58 | 44.5 | 26.3  | 36.32 | 36.96  |
| 66663  | 'Uba5'     | 14.43 | 19.45 | 9.8  | 57.7 | 16.4 | 19.99 | 28.7 | 21.53 | 56.3  | 5.52   |
| 66664  | 'Tmem41a'  | 42.3  | 22.15 | 44.3 | 18.6 | 24.1 | 42.84 | 67.1 | 24.31 | 34.14 | 41.68  |
| 66665  | 'Msantd3'  | 0.86  | 5.16  | 2.85 | 0    | 4.22 | 4.61  | 9    | 0.82  | 2.77  | 0.33   |
| 666660 | 'Gm8220'   | 0     | 0     | 0.57 | 0    | 0.23 | 0     | 0    | 0     | 0     | 0.06   |
| 66667  | 'Hspbap1'  | 1.81  | 0.02  | 0    | 0    | 2    | 6.11  | 0    | 1.1   | 0     | 1.47   |
| 666675 | 'Gm8229'   | 0     | 0     | 0.14 | 0    | 0    | 0     | 0    | 0     | 0     | 0      |
| 666678 | 'Gm8232'   | 0     | 0     | 0.2  | 0    | 0    | 0     | 0    | 0     | 0     | 0      |
| 666704 | 'Samd1'    | 1     | 0     | 0    | 0    | 0.86 | 1.76  | 0    | 1.59  | 0     | 1.71   |
| 66671  | 'Ccnh'     | 42.59 | 24    | 31.6 | 27.3 | 36.8 | 46.14 | 23.4 | 47.29 | 36.14 | 26.5   |
| 666723 | 'Gm8256'   | 0     | 0     | 0.42 | 0    | 0.78 | 0     | 0    | 0     | 0     | 0      |
| 66673  | 'Sorcs3'   | 7.1   | 8.48  | 2.25 | 5.74 | 6.41 | 2.51  | 1.95 | 9.34  | 3.5   | 3.11   |
| 666731 | 'Trim43c'  | 0     | 0.02  | 0.11 | 0    | 0    | 0     | 0    | 0     | 0     | 0      |

|        |                  |       |       |      |      |      |       |      |       |       |        |
|--------|------------------|-------|-------|------|------|------|-------|------|-------|-------|--------|
| 66674  | 'Spryd7'         | 50.7  | 64.36 | 66.6 | 44   | 37.5 | 55.17 | 51.4 | 51.86 | 65.42 | 45.06  |
| 666747 | 'Trim43b'        | 0     | 0     | 0.02 | 0    | 0    | 0     | 0    | 0.28  | 0.02  | 0.1    |
| 666750 | 'Gm8271'         | 0     | 0     | 0    | 0.19 | 0.44 | 0     | 0    | 0     | 0     | 0.07   |
| 66676  | 'Tmed7'          | 6.9   | 3.44  | 3.73 | 37.8 | 3.27 | 1.72  | 6.88 | 2.66  | 0.81  | 1.84   |
| 66679  | 'Rae1'           | 75.56 | 63.33 | 91.9 | 52.7 | 66.6 | 65.27 | 62.2 | 52.02 | 47.97 | 24.52  |
| 666794 | 'Rbm24'          | 2.28  | 8.68  | 1.39 | 1.73 | 1.62 | 3.51  | 2.23 | 3.3   | 0.01  | 2.04   |
| 66680  | 'Oser1'          | 25.55 | 46.09 | 22.8 | 77.7 | 41.9 | 34.18 | 13.8 | 22.95 | 31.77 | 32.15  |
| 666808 | 'Gm10410'        | 0.04  | 0.88  | 2    | 0.35 | 1.65 | 1.49  | 0.05 | 0     | 0.92  | 0.78   |
| 66681  | 'Pgm1'           | 1.8   | 0.88  | 0    | 0.12 | 6.85 | 3.7   | 5.42 | 2.53  | 2.65  | 3.6    |
| 66682  | 'Trappc5'        | 68.4  | 34.61 | 19.3 | 24.5 | 41.5 | 45.64 | 33.4 | 34.44 | 22.69 | 70.34  |
| 66684  | 'Tceal8'         | 22.88 | 27.92 | 33.8 | 95.7 | 34   | 25.53 | 45.9 | 20.61 | 20.57 | 21.25  |
| 66686  | 'Dcbl1'          | 0     | 1.71  | 1.4  | 1.46 | 1.32 | 0     | 15.6 | 3.21  | 7.97  | 0      |
| 66687  | 'Tbc1d15'        | 3.8   | 24.92 | 8.93 | 44.1 | 13.3 | 13.73 | 21.3 | 19.06 | 30.38 | 15.64  |
| 66689  | 'Klhl28'         | 0.1   | 4.52  | 0.12 | 9.74 | 9.84 | 4.75  | 14.2 | 0.85  | 0.94  | 5.18   |
| 66690  | 'Tmem186'        | 22.12 | 13.41 | 19   | 0.04 | 4.16 | 0.52  | 5.52 | 20.02 | 27.53 | 7.24   |
| 66691  | 'Gapvd1'         | 11.7  | 13.52 | 9.79 | 9.94 | 9.29 | 13.87 | 13.8 | 4.66  | 6.88  | 14.69  |
| 666938 | 'Bend4'          | 3.62  | 0.03  | 2.92 | 0    | 0.86 | 2.23  | 2.05 | 1.89  | 1.6   | 2.09   |
| 66694  | 'Uqcrcf1'        | 213.2 | 183.4 | 238  | 151  | 230  | 254.7 | 213  | 210.3 | 242.2 | 237.06 |
| 66696  | 'Snx31'          | 0     | 0     | 0    | 3.24 | 0    | 0     | 0    | 0     | 0     | 0      |
| 66700  | 'Chmp3'          | 36.65 | 37.19 | 59.8 | 60.4 | 57.9 | 59.16 | 66.2 | 52.91 | 63.76 | 56.21  |
| 66701  | 'Spryd4'         | 15.33 | 1.58  | 10.2 | 11.8 | 10.5 | 13.63 | 45.8 | 4.98  | 7.88  | 2.86   |
| 667034 | 'Pnp2'           | 10.96 | 5.39  | 13.6 | 21.7 | 16.9 | 39.78 | 0.05 | 15.43 | 4.77  | 15.64  |
| 66704  | 'Rbm4b'          | 51.77 | 27.4  | 27.2 | 23   | 39.3 | 42.79 | 50.7 | 42.36 | 59.57 | 45.8   |
| 66705  | 'Dnase1l2'       | 0     | 0.32  | 0.06 | 0    | 0.06 | 8.44  | 0    | 4.57  | 0.12  | 0      |
| 667055 | 'Unc93a2'        | 0     | 0     | 0    | 0    | 0    | 0     | 0    | 0     | 0.08  | 0      |
| 66706  | 'Ndufaf3'        | 99.36 | 91.97 | 74   | 65.5 | 104  | 112.6 | 73.2 | 85.82 | 53.71 | 99.94  |
| 667060 | 'Vmn2r5'         | 0     | 0.06  | 0.16 | 0    | 0    | 0.15  | 0    | 0     | 0     | 0      |
| 667069 | 'Vmn2r6'         | 0     | 0.02  | 0    | 0    | 0    | 0     | 0    | 0     | 0     | 0      |
| 66707  | 'Nkapl'          | 3.57  | 2.01  | 1.44 | 0    | 0    | 10.97 | 0    | 1.85  | 3.62  | 4.05   |
| 667094 | 'Gm8453'         | 0     | 0     | 0.02 | 0    | 0    | 0     | 0    | 0     | 0     | 0      |
| 667103 | 'Gm13570'        | 0     | 0.07  | 0    | 0    | 0    | 0     | 0    | 0.5   | 0     | 0      |
| 66711  | 'Sbds'           | 81.71 | 78.73 | 90.4 | 128  | 105  | 115.5 | 64.3 | 102.7 | 122   | 113.72 |
| 667118 | 'Zbed6'          | 1.13  | 0.54  | 0.55 | 1.81 | 0.13 | 0.02  | 0.14 | 0.44  | 0.38  | 0.72   |
| 66713  | 'Actr2'          | 49.81 | 31.94 | 44.5 | 34.1 | 70.3 | 24.76 | 33.9 | 60.76 | 53.51 | 57.84  |
| 66714  | '4921524J17Rik'  | 19.91 | 11.65 | 17.1 | 25.9 | 8.7  | 19.22 | 5.64 | 14.93 | 15.58 | 16.5   |
| 66715  | 'Henmt1'         | 0.13  | 0     | 0    | 0.02 | 3.83 | 0     | 4.61 | 1.67  | 4.33  | 0.01   |
| 66717  | 'Ccadc96'        | 2.89  | 2.61  | 0    | 10.1 | 1.55 | 0     | 0    | 0     | 0.54  | 4.16   |
| 66720  | 'Klhl10'         | 21.71 | 24.23 | 29.1 | 29.5 | 19.4 | 19.97 | 36   | 19.68 | 30.43 | 26.98  |
| 667214 | '9930111J21Rik1' | 0.34  | 0.23  | 0.08 | 0.81 | 0.14 | 1.49  | 0.37 | 0.09  | 0.15  | 0.23   |
| 66722  | 'Spag16'         | 6.18  | 10.28 | 0.03 | 11.3 | 7.34 | 3     | 0.08 | 0.36  | 3.93  | 0.99   |
| 66724  | 'Tab3'           | 0     | 0.16  | 0.06 | 0    | 1.24 | 0     | 0    | 0.28  | 0.01  | 0      |
| 667240 | 'Vmn1r121'       | 0     | 0     | 0    | 0.02 | 0    | 0     | 0    | 0     | 0     | 0      |
| 66725  | 'Lrrk2'          | 0.01  | 0.01  | 1.84 | 0.01 | 0.25 | 0     | 2.54 | 0.09  | 1.29  | 1.07   |
| 667250 | 'Gm12657'        | 2.03  | 3.6   | 3.15 | 3.05 | 1.46 | 2.05  | 5.52 | 1.53  | 1.07  | 1.4    |
| 667259 | 'Vmn1r118'       | 0     | 0     | 0.02 | 0    | 0    | 0     | 0    | 0     | 0     | 0      |
| 66729  | 'Ankrd61'        | 0     | 0     | 1.4  | 0    | 0    | 0     | 0    | 0     | 0     | 0      |
| 667292 | 'Vmn1r111'       | 0     | 0     | 0.02 | 0    | 0    | 0     | 0    | 0     | 0     | 0      |
| 66732  | '4921530L21Rik'  | 0     | 0.53  | 0    | 0    | 0    | 0     | 0    | 0     | 0     | 0      |
| 66733  | 'Kcng4'          | 0     | 0.28  | 6.12 | 0    | 6.75 | 0     | 0    | 0     | 0.01  | 2.33   |
| 66734  | 'Map1lc3a'       | 404.9 | 227.6 | 398  | 393  | 266  | 229.3 | 339  | 287.6 | 307.5 | 88.85  |
| 66736  | 'Emc2'           | 76.68 | 74.01 | 73.3 | 79.7 | 104  | 54.83 | 31.6 | 74.05 | 57.84 | 62.56  |
| 667370 | 'Ifit3b'         | 0     | 0     | 14.5 | 31.5 | 2.3  | 0     | 0.03 | 2.88  | 2.8   | 0      |
| 667373 | 'Ifit1bl1'       | 4.88  | 0     | 0.04 | 0    | 0.07 | 6.77  | 5.46 | 1.52  | 0     | 0      |
| 667378 | 'Gm8600'         | 0     | 0     | 0    | 0    | 0    | 0     | 0    | 0     | 1.01  | 0      |
| 66740  | '4931417E11Rik'  | 0     | 0     | 0.05 | 0    | 0    | 0     | 0    | 0     | 0     | 0      |
| 66743  | 'Rnf220'         | 30.69 | 29.08 | 14.3 | 9.3  | 33.9 | 5.19  | 22.2 | 18.13 | 13.57 | 30.84  |
| 66748  | 'Erich2'         | 0     | 0     | 0.23 | 0    | 0    | 0     | 0    | 0.07  | 2.36  | 0      |
| 66753  | 'Erlec1'         | 15.24 | 27.83 | 16.8 | 21.2 | 23.8 | 20.59 | 7.69 | 18.22 | 14.45 | 22.65  |

|        |                 |       |       |      |      |      |       |      |       |       |        |
|--------|-----------------|-------|-------|------|------|------|-------|------|-------|-------|--------|
| 66756  | 'Cfap97'        | 3.62  | 3.8   | 3.37 | 8.38 | 4.37 | 2.25  | 9.43 | 6.46  | 9.21  | 3.76   |
| 66757  | 'Adat2'         | 2.25  | 0.07  | 0.1  | 0.05 | 6.51 | 0.03  | 4.98 | 0     | 3.21  | 0.03   |
| 667570 | 'Gm8708'        | 0     | 0     | 0    | 0    | 0    | 0     | 0    | 0     | 1.01  | 0      |
| 66761  | '4933417A18Rik' | 0     | 0.05  | 0    | 0    | 0    | 0     | 0    | 0     | 0     | 0      |
| 66763  | '4933425L06Rik' | 0     | 0     | 0    | 0    | 0    | 0     | 0    | 0     | 0     | 0.32   |
| 66765  | '4933411K16Rik' | 0     | 0     | 0    | 0    | 0    | 0     | 0    | 0     | 0     | 3.13   |
| 667663 | 'Myo3a'         | 0     | 0     | 0.68 | 0    | 0    | 0     | 0    | 0     | 0     | 0      |
| 66768  | 'Pacrgl'        | 3.14  | 4.76  | 2.7  | 29.3 | 1.53 | 0.03  | 0.83 | 0     | 4.47  | 0      |
| 66771  | 'Gid4'          | 9.49  | 6.26  | 5.57 | 6.54 | 4.87 | 4.32  | 7.04 | 4.14  | 2.97  | 2.34   |
| 66773  | 'Gm17019'       | 0.11  | 0.13  | 0.14 | 0    | 0.17 | 0.56  | 0.28 | 0     | 0     | 0.06   |
| 667742 | 'Piezo2'        | 1.31  | 0     | 0    | 0.09 | 0.16 | 0     | 0.01 | 0     | 0     | 0.04   |
| 66775  | 'Hacd4'         | 0     | 0     | 3.03 | 3.82 | 0    | 0     | 0    | 0.79  | 0     | 1.84   |
| 667772 | 'Myh15'         | 0     | 0.18  | 0.01 | 0    | 0    | 0     | 0    | 0     | 0.01  | 0      |
| 667803 | 'H2-T-ps'       | 0.18  | 6.08  | 4.06 | 1.76 | 0    | 0.19  | 0    | 0.08  | 1.58  | 6.9    |
| 667823 | 'Trim5'         | 0     | 2.35  | 0    | 0    | 0    | 0.01  | 0    | 0     | 0     | 0      |
| 66784  | 'Fam187a'       | 0     | 0     | 0.03 | 0    | 0    | 0     | 0    | 0     | 0     | 0      |
| 66787  | 'Gskip'         | 56.66 | 52.48 | 43.8 | 15.6 | 48.6 | 38.48 | 39.3 | 63.94 | 30.02 | 49.82  |
| 66789  | 'Alg14'         | 19.1  | 49.93 | 8.17 | 32.6 | 16.4 | 26.88 | 24.4 | 27.53 | 42.29 | 73.53  |
| 66790  | 'Grtp1'         | 5.78  | 10.8  | 6.11 | 0.27 | 0.04 | 0     | 3.66 | 15.03 | 0.62  | 7.44   |
| 66793  | 'Efcab1'        | 39.57 | 31.42 | 16.6 | 18.7 | 23.9 | 35.64 | 18.8 | 28.21 | 19.37 | 39.6   |
| 66795  | 'Atg10'         | 19.7  | 11.97 | 23.5 | 33   | 17.6 | 18.11 | 11.1 | 16.54 | 9.18  | 36.19  |
| 667962 | 'Zfp966'        | 2.12  | 0.9   | 0    | 1.8  | 1.28 | 0.09  | 0.51 | 1.25  | 0.54  | 1.11   |
| 66797  | 'Cntnap2'       | 101   | 33.93 | 58.3 | 55   | 25.6 | 62.99 | 39   | 109.9 | 11.15 | 20.2   |
| 667977 | 'Gm8909'        | 0.02  | 0.08  | 0.18 | 2.68 | 1.92 | 0.1   | 0    | 0.09  | 1.19  | 0.07   |
| 66799  | 'Ube2w'         | 35.56 | 45.55 | 19.2 | 38.3 | 31.2 | 24.46 | 35.1 | 28.87 | 36.23 | 32.27  |
| 66801  | 'Prkrip1'       | 13.31 | 20.56 | 19   | 2.5  | 17.8 | 16.25 | 20.5 | 24.4  | 25.23 | 25.07  |
| 668035 | 'Olfr687'       | 0     | 0     | 0    | 0    | 0.09 | 0     | 0    | 0     | 0     | 0      |
| 668039 | 'Gm14434'       | 0     | 0.4   | 0    | 0    | 0.97 | 0     | 0    | 0.26  | 1.92  | 0.3    |
| 66808  | '9030624G23Rik' | 0.36  | 0.53  | 1.46 | 1.12 | 0.73 | 0.54  | 3.06 | 3.39  | 8.15  | 0.39   |
| 66809  | 'Krt20'         | 1.56  | 2.74  | 0    | 0    | 2.99 | 0     | 0    | 0.14  | 0     | 0      |
| 66810  | 'Rbm22'         | 6.89  | 11.93 | 8.21 | 33   | 9.69 | 6.37  | 1.54 | 9.85  | 15.1  | 17.26  |
| 668110 | 'Syce1l'        | 0     | 0     | 1.12 | 0    | 0.47 | 0     | 0    | 0     | 0     | 0      |
| 66812  | 'Ppcdc'         | 10.07 | 8.63  | 7.82 | 14.6 | 5.87 | 28.43 | 18.8 | 18.85 | 20.39 | 5.57   |
| 668137 | 'Gm8994'        | 0     | 0     | 0    | 0    | 0    | 0     | 0    | 0     | 0     | 0      |
| 66815  | 'Mcub'          | 3.04  | 0     | 0    | 0    | 34.4 | 0.04  | 0    | 0     | 4.02  | 10.63  |
| 668158 | 'Ccdc85c'       | 5.08  | 2.92  | 8.64 | 8.14 | 4.18 | 1.11  | 4.37 | 2.79  | 8.94  | 7.38   |
| 66816  | 'Thap2'         | 0.41  | 1.11  | 2.99 | 2.41 | 1.8  | 1.18  | 0.23 | 3.11  | 0.42  | 0.51   |
| 668166 | 'Zxdb'          | 0.33  | 1.15  | 0.21 | 0    | 0    | 0.17  | 0    | 0.2   | 1.32  | 1.31   |
| 66817  | 'Tmem170'       | 0.76  | 3.34  | 0.75 | 1.99 | 6    | 4.65  | 1.7  | 2.59  | 6.08  | 2.27   |
| 668173 | 'Pex10'         | 12.99 | 12.47 | 11.4 | 11.3 | 13.2 | 3.64  | 17.2 | 12.85 | 17.64 | 15.33  |
| 66818  | 'Smim7'         | 27.27 | 24.35 | 32.9 | 38.4 | 38.5 | 36.28 | 31.6 | 38.3  | 17.2  | 36.72  |
| 668208 | 'Gm13288'       | 0     | 0     | 0    | 0    | 0    | 0     | 0    | 0     | 0     | 0.01   |
| 66821  | 'Bcs1l'         | 15.95 | 28.02 | 9.65 | 19   | 6.52 | 40.72 | 29.7 | 31.21 | 21.54 | 15.73  |
| 668212 | 'Efr3b'         | 7.19  | 4.17  | 15.8 | 10.7 | 6.55 | 5.07  | 13.9 | 4.97  | 7.94  | 8.18   |
| 668218 | 'Bin2'          | 5.25  | 2.82  | 0.05 | 18.9 | 9.7  | 42.15 | 6.61 | 0.76  | 0     | 3.11   |
| 66822  | 'Fbxo25'        | 70.84 | 51.93 | 39.4 | 33.5 | 47.1 | 53.69 | 40.5 | 113.5 | 52.06 | 77     |
| 668225 | 'Fignl2'        | 0     | 0     | 0    | 0    | 0    | 0     | 0    | 0.02  | 0.27  | 0      |
| 66824  | 'Pycard'        | 2.66  | 1.48  | 1.87 | 2.48 | 0.62 | 6.32  | 1.29 | 0.11  | 9.53  | 1.89   |
| 66826  | 'Taz'           | 60.68 | 50.28 | 50.4 | 51.1 | 105  | 105.7 | 51.4 | 77.88 | 63.13 | 106.81 |
| 66827  | 'Ttc1'          | 82.84 | 68.8  | 71.5 | 108  | 67   | 64.4  | 82.2 | 62.81 | 114.7 | 69.27  |
| 66830  | 'Nacc1'         | 1.34  | 0.17  | 1.32 | 0.01 | 1.8  | 0.34  | 1.05 | 1.23  | 2.18  | 1.63   |
| 668303 | 'Kif26a'        | 0.4   | 0.27  | 0.01 | 1.4  | 0.37 | 0.57  | 0.86 | 0.14  | 0.01  | 0.05   |
| 668310 | 'Cc2d2b'        | 0     | 0.24  | 0    | 0    | 0    | 0     | 0    | 0.01  | 0     | 0      |
| 66832  | 'Rsph3a'        | 16.85 | 30.05 | 33.9 | 25   | 18.4 | 35.66 | 25.3 | 27.39 | 28.31 | 20.74  |
| 668339 | 'Gm9112'        | 0     | 7.1   | 0    | 0    | 0    | 0     | 0    | 0     | 0     | 0      |
| 66834  | 'Acot13'        | 152.9 | 160.3 | 130  | 302  | 127  | 233.1 | 160  | 227.8 | 196.2 | 272.21 |
| 66836  | 'Tmem223'       | 137.1 | 86.02 | 49.9 | 72.4 | 50   | 112.1 | 127  | 77.48 | 92.62 | 113.95 |
| 66839  | 'Dele1'         | 29.55 | 12.5  | 26.7 | 3.85 | 18.2 | 11.77 | 9.91 | 12.45 | 23.26 | 33.59  |

|        |                 |       |       |      |      |      |       |      |       |       |        |
|--------|-----------------|-------|-------|------|------|------|-------|------|-------|-------|--------|
| 66840  | 'Wdr45b'        | 44.9  | 45.29 | 48.3 | 55.8 | 54.6 | 54.64 | 44   | 58.99 | 50.95 | 70.14  |
| 66841  | 'Etfdh'         | 29.13 | 26.51 | 11.5 | 34.3 | 25.1 | 9.7   | 36   | 19.1  | 9.3   | 28.95  |
| 66844  | 'Ormdl2'        | 17.9  | 24.97 | 12.1 | 9.36 | 12.2 | 6.49  | 15.8 | 7.46  | 21.43 | 10.56  |
| 66845  | 'Mrpl33'        | 121.5 | 134.7 | 137  | 305  | 117  | 144.1 | 143  | 96.59 | 134.9 | 132.03 |
| 66847  | 'Hint3'         | 7.82  | 10.29 | 5.5  | 0.09 | 9.12 | 0     | 9.23 | 8.22  | 8.95  | 21     |
| 66848  | 'Fuca2'         | 30.24 | 35.41 | 40.9 | 30.7 | 28.9 | 53.6  | 20.7 | 39.32 | 40.87 | 59.13  |
| 66849  | 'Ppp1r2'        | 29.76 | 41.42 | 47   | 49.1 | 22.8 | 27.98 | 24.6 | 28.02 | 51.99 | 26     |
| 668501 | 'Zfp507'        | 2.73  | 1.12  | 1.01 | 4.04 | 0.07 | 1.2   | 0    | 0.31  | 3.01  | 0.59   |
| 66853  | 'Pnpla2'        | 8.38  | 19    | 12.8 | 18   | 6.74 | 2.73  | 3.47 | 16.85 | 6.25  | 4.72   |
| 66854  | 'Trim35'        | 80.8  | 89.72 | 66.5 | 75   | 67.9 | 37.69 | 46.8 | 118.2 | 100   | 95.37  |
| 66855  | 'Tcf25'         | 273.4 | 285   | 376  | 130  | 286  | 234.9 | 373  | 332.6 | 277.8 | 246.84 |
| 66857  | 'Plbd1'         | 0.16  | 0     | 0.03 | 0    | 0    | 0     | 0    | 0.02  | 0     | 0      |
| 668588 | 'Gm9257'        | 0.54  | 0.07  | 1.09 | 0    | 0.15 | 0.37  | 0.22 | 0.51  | 2.56  | 0.33   |
| 66859  | 'Slc16a9'       | 0     | 0.18  | 0    | 0    | 0    | 0     | 0    | 0     | 0     | 0      |
| 66860  | 'Tanc1'         | 0.12  | 0     | 0    | 1.07 | 0.02 | 0.1   | 0.06 | 0.48  | 0.68  | 0      |
| 668605 | 'Gm9265'        | 0.05  | 0.09  | 0    | 0    | 0.82 | 0     | 0.09 | 0.26  | 0.12  | 0.02   |
| 66861  | 'Dnajt10'       | 13.31 | 34.93 | 44.3 | 14.9 | 35.2 | 8.45  | 26.4 | 33.85 | 46.17 | 33.51  |
| 668620 | 'Zfp936'        | 0.03  | 0.02  | 0.03 | 0    | 0.05 | 0     | 0    | 0.09  | 0     | 0.1    |
| 66863  | 'Lztr1'         | 40.86 | 36.7  | 39.3 | 54.6 | 48.9 | 22.23 | 40.8 | 62.8  | 56.37 | 44.44  |
| 66864  | 'Clec14a'       | 0     | 0     | 0    | 0    | 0    | 0     | 2.73 | 0     | 0     | 0      |
| 66865  | 'Pmpca'         | 32.86 | 32.97 | 35.3 | 56.4 | 32.9 | 31.72 | 28.4 | 30.56 | 48.79 | 24.4   |
| 66866  | 'Nhirc2'        | 4.41  | 2.01  | 4.7  | 0.68 | 1.58 | 6.33  | 1.59 | 0.21  | 2.97  | 4.77   |
| 668661 | '2410002F23Rik' | 97.19 | 122.8 | 138  | 71.3 | 70.2 | 107.3 | 176  | 117.7 | 138.9 | 136.41 |
| 66867  | 'Hmg20a'        | 44.11 | 35.28 | 42.4 | 23.2 | 25.1 | 21.18 | 36.6 | 19.62 | 15.64 | 32.93  |
| 66868  | 'Mfsd1'         | 12.21 | 12.56 | 11.6 | 5.28 | 14.6 | 9.99  | 5.1  | 5.56  | 41.55 | 18.83  |
| 66869  | 'Zfp869'        | 15.03 | 13.81 | 16.2 | 18.1 | 12.5 | 3.36  | 13   | 6.9   | 15.34 | 11.55  |
| 66870  | 'Serbp1'        | 18.47 | 21.17 | 16   | 40.5 | 14   | 20.43 | 31.5 | 20.18 | 19.12 | 14.9   |
| 66871  | 'Cpne8'         | 5.73  | 12.24 | 11.7 | 43.6 | 56.7 | 24.74 | 20.3 | 11.22 | 32.9  | 14.8   |
| 668725 | 'Mrgpra9'       | 0     | 0     | 0.09 | 0    | 0    | 0     | 0    | 0     | 0     | 0      |
| 66873  | 'Tril'          | 1.56  | 6.83  | 5.04 | 0.01 | 1.41 | 5.56  | 12.6 | 7.66  | 3.99  | 1.19   |
| 66874  | 'Ncbp3'         | 1.92  | 3.76  | 1.71 | 2.55 | 4.16 | 1.81  | 1.28 | 6.15  | 0.39  | 2.01   |
| 66875  | 'Swt1'          | 4.43  | 3.92  | 1.33 | 3.95 | 2.44 | 1.25  | 6.33 | 2.36  | 3.48  | 0.88   |
| 66877  | 'Crnkl1'        | 4.31  | 4.46  | 5.55 | 13.8 | 2.32 | 1.7   | 10.1 | 5.43  | 2.42  | 3.51   |
| 66878  | 'Riok3'         | 20.56 | 15.88 | 11.9 | 25.9 | 12.5 | 11.91 | 10.2 | 10.86 | 12.91 | 24.75  |
| 66880  | 'Rsrc1'         | 19.74 | 22.49 | 38.2 | 48.9 | 28.9 | 17.91 | 35.4 | 29.46 | 31.96 | 22.21  |
| 66881  | 'Pcyox1'        | 41.03 | 66.31 | 46.2 | 17.8 | 51.8 | 29.08 | 31.9 | 42.78 | 66.79 | 53.07  |
| 66882  | 'Bzw1'          | 32.51 | 44.63 | 41.6 | 26.5 | 39.3 | 9.77  | 36.4 | 25.02 | 27.44 | 23.31  |
| 66884  | 'Appbp2'        | 20.49 | 16.5  | 11.3 | 29.3 | 18   | 64.79 | 17.5 | 25.05 | 30.46 | 25.22  |
| 66885  | 'Acadsb'        | 39.94 | 30.92 | 30   | 19.7 | 37.3 | 29.13 | 34.4 | 24.21 | 26.61 | 26.55  |
| 66887  | 'Lonp2'         | 48.71 | 54.86 | 74.3 | 37.2 | 55.1 | 74.73 | 74.8 | 65.03 | 115.6 | 107.38 |
| 668880 | 'Stard9'        | 0     | 0.12  | 0.48 | 0.38 | 0.04 | 0.6   | 0.55 | 0.21  | 0.24  | 0.1    |
| 66889  | 'Rnf128'        | 18.31 | 56.01 | 49   | 30.1 | 39.3 | 60.25 | 42.1 | 16.32 | 118.7 | 19.62  |
| 668894 | 'Gm14025'       | 2     | 0.31  | 0.45 | 0.97 | 0.08 | 0.07  | 0.08 | 0.03  | 0.76  | 0.02   |
| 66890  | 'Lman2'         | 38.49 | 29.87 | 26.9 | 22.7 | 17.7 | 30.73 | 34.7 | 27.15 | 65.19 | 41.6   |
| 66892  | 'Eif4e3'        | 9.57  | 7.84  | 1.33 | 2.03 | 6.8  | 6.28  | 3.37 | 3.43  | 1.95  | 8.55   |
| 668923 | 'Zfp442'        | 1.38  | 4.44  | 2.01 | 1.43 | 3.92 | 2.15  | 0.41 | 0.55  | 4.06  | 2.77   |
| 668929 | 'Rad21l'        | 0.97  | 5.07  | 0.87 | 0    | 1.12 | 2.39  | 2.97 | 2.47  | 2.69  | 0.92   |
| 66894  | 'Wwp2'          | 13.5  | 16.59 | 8.87 | 8.44 | 16.2 | 15.04 | 7.5  | 17.19 | 28.57 | 10.88  |
| 668940 | 'Myh7b'         | 1.89  | 1.47  | 2.35 | 0.12 | 2.09 | 2.43  | 4.78 | 1.75  | 1.44  | 0.9    |
| 66895  | 'Pxdc1'         | 0     | 0     | 3.49 | 0    | 0    | 0     | 0    | 1.4   | 0.05  | 0      |
| 66897  | 'Naa16'         | 10.53 | 4.04  | 2.09 | 0.61 | 6.25 | 4.83  | 0.78 | 6.09  | 3.69  | 10.46  |
| 66898  | 'Baiap21l'      | 0     | 0     | 0.54 | 3.28 | 0    | 0.67  | 0    | 0     | 0     | 0.21   |
| 66899  | 'Fip11l'        | 19.02 | 13.06 | 14.6 | 8.18 | 6.17 | 9.7   | 8.12 | 14.87 | 16.28 | 12.54  |
| 66901  | 'Proz'          | 1.77  | 0.26  | 0    | 0    | 0.04 | 0     | 0.09 | 0.04  | 0.2   | 0.25   |
| 66902  | 'Mtap'          | 3.47  | 2.76  | 7.42 | 6.46 | 0.77 | 6.68  | 15.5 | 5.72  | 3.03  | 14.5   |
| 66904  | 'Pccb'          | 8.76  | 22.64 | 34.2 | 24.2 | 29.8 | 16.49 | 14.6 | 17.36 | 9.77  | 11.75  |
| 66905  | 'Plin3'         | 1.65  | 3.38  | 1.27 | 0.16 | 3.92 | 0.11  | 1.58 | 1.97  | 0.48  | 0.04   |
| 66910  | 'Tmem107'       | 25.85 | 21.87 | 15.9 | 39   | 20.1 | 68.41 | 23.1 | 28.11 | 16.79 | 65.62  |

|       |                 |       |       |      |      |      |       |      |       |       |        |
|-------|-----------------|-------|-------|------|------|------|-------|------|-------|-------|--------|
| 66911 | 'Nudt16l1'      | 60.68 | 129.1 | 103  | 161  | 107  | 112.2 | 116  | 101.8 | 91.98 | 77.4   |
| 66912 | 'Bzw2'          | 17.14 | 31.34 | 37   | 12.4 | 14.1 | 24.04 | 23.6 | 32.25 | 16.67 | 14.24  |
| 66913 | 'Kdelr2'        | 71.53 | 71.51 | 37.4 | 101  | 62.9 | 23.33 | 46.7 | 44.7  | 45.41 | 59.03  |
| 66914 | 'Vps28'         | 528.4 | 359.9 | 501  | 400  | 467  | 644   | 289  | 569.7 | 485.3 | 575.37 |
| 66915 | 'Cops9'         | 297.8 | 349.3 | 319  | 383  | 296  | 595.6 | 193  | 160.6 | 339.2 | 199.33 |
| 66916 | 'Ndufb7'        | 340   | 313.2 | 404  | 469  | 325  | 540.1 | 435  | 426.6 | 466.5 | 369.78 |
| 66917 | 'Chordc1'       | 86.13 | 117.7 | 37.4 | 40.5 | 30.8 | 60.13 | 55.7 | 52.02 | 58.29 | 81.42  |
| 66921 | 'Prpf38b'       | 18.32 | 20.6  | 22.6 | 30.2 | 10.2 | 7.8   | 20.5 | 15.53 | 10.1  | 9.4    |
| 66922 | 'Rras2'         | 0     | 0.15  | 0.77 | 0    | 0.89 | 0     | 0.02 | 0     | 0.08  | 0.04   |
| 66923 | 'Pbrm1'         | 3.57  | 5.31  | 3.56 | 4.86 | 6.59 | 3.89  | 3.06 | 6.22  | 4.55  | 4.43   |
| 66925 | 'Sdhd'          | 288   | 238.7 | 277  | 218  | 257  | 391.2 | 217  | 245.8 | 201.6 | 320.19 |
| 66926 | 'Trmt6'         | 14.58 | 4.15  | 13.3 | 12.9 | 9.74 | 6.77  | 11.5 | 8.46  | 12.29 | 10.24  |
| 66928 | 'Dmac1'         | 74.86 | 78.66 | 43.2 | 53.1 | 75.1 | 85.89 | 68.4 | 62.29 | 53.55 | 37.56  |
| 66929 | 'Asf1b'         | 0     | 0     | 3.62 | 11.4 | 9.7  | 0     | 0    | 0     | 0.05  | 0      |
| 66930 | 'Fank1'         | 10.49 | 11.91 | 19.4 | 20.5 | 27.3 | 6.23  | 4.09 | 6.99  | 19.04 | 30.26  |
| 66931 | '1700010l14Rik' | 14.59 | 8.01  | 2.88 | 9.07 | 0.19 | 0.27  | 3.58 | 9.4   | 2.9   | 4.18   |
| 66932 | 'Rexo1'         | 2.62  | 2.69  | 4.65 | 8.42 | 7.96 | 4.9   | 6.92 | 1.76  | 5.62  | 0.07   |
| 66934 | 'Dsn1'          | 1.83  | 6.74  | 0.06 | 0    | 1.85 | 1.32  | 0.11 | 0.19  | 0.02  | 1.77   |
| 66935 | 'Cir1'          | 13.6  | 18.62 | 24.1 | 14.3 | 24.2 | 16.76 | 14.3 | 9.09  | 9.09  | 9.82   |
| 66938 | 'Sh3d21'        | 0     | 0.86  | 0.83 | 0    | 2.58 | 2.04  | 0.09 | 0     | 0     | 0      |
| 66939 | 'Aagab'         | 52.2  | 18.92 | 17.3 | 16.9 | 42.8 | 14.74 | 46.4 | 48.24 | 42.84 | 58.02  |
| 66940 | 'Shisa5'        | 69.47 | 94.16 | 63.3 | 157  | 61.5 | 153.2 | 95.9 | 153.7 | 205.2 | 194.49 |
| 66942 | 'Ddx18'         | 13.24 | 14.95 | 14.5 | 26.1 | 12.7 | 12.73 | 23.9 | 9.37  | 19.31 | 11.04  |
| 66943 | 'Pqlc1'         | 20.53 | 25    | 15.5 | 42.5 | 13.6 | 19.87 | 38.4 | 10.02 | 46.63 | 25.87  |
| 66945 | 'Sdha'          | 284.1 | 328.6 | 371  | 216  | 296  | 404.9 | 353  | 361   | 373.6 | 412.68 |
| 66948 | 'Acad8'         | 25.09 | 21.46 | 10.9 | 20.7 | 25.3 | 21.81 | 41.2 | 21.39 | 22.48 | 18.58  |
| 66949 | 'Trim59'        | 0.03  | 5.66  | 0    | 0.29 | 0.22 | 0.32  | 0    | 0.83  | 0.01  | 1.23   |
| 66950 | 'Tmem206'       | 9.56  | 22.16 | 15.2 | 19   | 11.6 | 18.35 | 15.6 | 13.09 | 19.49 | 19.21  |
| 66952 | '2310030G06Rik' | 0     | 3.48  | 2.97 | 0    | 1.42 | 4.6   | 0    | 7     | 10.12 | 2.64   |
| 66953 | 'Cdca7'         | 0     | 0     | 0    | 0    | 0    | 0     | 3.78 | 0     | 0     | 2.59   |
| 66958 | 'Tmx2'          | 456   | 396.5 | 419  | 275  | 395  | 524.1 | 531  | 500.6 | 414.4 | 527.6  |
| 66959 | 'Dusp26'        | 171.6 | 219.3 | 162  | 167  | 193  | 225.3 | 239  | 149.9 | 219.3 | 141.97 |
| 66960 | 'Mindy3'        | 10.22 | 10    | 14.7 | 27.6 | 11.6 | 25.79 | 4.69 | 12.45 | 16.19 | 12.03  |
| 66962 | 'Swsap1'        | 19.11 | 19.71 | 3.48 | 6.64 | 11   | 12.33 | 0.16 | 14.81 | 18.88 | 4.17   |
| 66964 | 'Golt1b'        | 69.27 | 48.85 | 35.7 | 73.3 | 63   | 57.13 | 24.4 | 69.5  | 50.9  | 75.64  |
| 66965 | 'Ctu2'          | 17.23 | 16.71 | 21.6 | 6.67 | 7.19 | 14.13 | 11.4 | 31.52 | 26.44 | 20.93  |
| 66966 | 'Trit1'         | 10.44 | 10.52 | 4.09 | 9.31 | 1.68 | 1.67  | 8.7  | 11.53 | 11.6  | 12.45  |
| 66967 | 'Edem3'         | 1.64  | 2.69  | 3.3  | 5.18 | 1.63 | 1.23  | 0.58 | 1.34  | 2.29  | 1.19   |
| 66968 | 'Plin5'         | 3.44  | 2.42  | 3.81 | 5.35 | 0    | 15.77 | 0.03 | 3.32  | 0.03  | 0      |
| 66970 | 'Ssbp2'         | 76.34 | 48.78 | 96.7 | 33.2 | 92.7 | 60.6  | 40.5 | 38.7  | 51.29 | 63.19  |
| 66971 | 'Cdk5rap1'      | 14.65 | 8.82  | 2.32 | 2.87 | 11.8 | 6.19  | 4.86 | 6.79  | 11.96 | 11.48  |
| 66972 | 'Slc25a23'      | 5.58  | 5.22  | 8.7  | 3.58 | 10.2 | 2.32  | 6.62 | 3.9   | 8.3   | 1.95   |
| 66973 | 'Mrps18b'       | 36.65 | 52.66 | 55.8 | 61.2 | 60.2 | 89.67 | 26.6 | 44.85 | 32.76 | 55.66  |
| 66975 | 'Trappc13'      | 36.27 | 33.9  | 25.2 | 15.7 | 24   | 11.17 | 23.3 | 33.22 | 25.93 | 45.12  |
| 66977 | 'Nuf2'          | 0.96  | 0     | 0    | 0    | 0.02 | 0     | 0    | 0     | 0     | 0      |
| 66978 | 'Luc7l'         | 23.4  | 17.59 | 22.1 | 16.7 | 22.5 | 26.61 | 18.1 | 15.7  | 24.7  | 24.7   |
| 66979 | 'Pole4'         | 20.13 | 12.58 | 13.1 | 35.9 | 35.2 | 35.43 | 14.9 | 16.62 | 40.44 | 9.09   |
| 66980 | 'Zdhhc6'        | 19.3  | 16.35 | 17.7 | 5.75 | 38.8 | 5.41  | 19.6 | 41.08 | 44.74 | 21.22  |
| 66983 | 'Zfp830'        | 4.15  | 4.52  | 7.35 | 3.8  | 8.44 | 1.61  | 2.09 | 4.15  | 7.38  | 1.34   |
| 66985 | 'Rassf7'        | 0     | 2.03  | 0    | 0    | 5.16 | 0.03  | 0    | 3.41  | 4.95  | 4.5    |
| 66988 | 'Lap3'          | 13.22 | 20.36 | 13.8 | 26.3 | 14   | 17.59 | 49.7 | 17.7  | 16.96 | 15.78  |
| 66989 | 'Kctd20'        | 27.86 | 18.59 | 22.2 | 20.9 | 22.9 | 7.83  | 16.6 | 18.44 | 17.09 | 20.72  |
| 66990 | 'Tmem134'       | 20.56 | 21.73 | 10.8 | 11.4 | 14.9 | 27.16 | 21.9 | 10.27 | 10.78 | 10.42  |
| 66991 | 'Khdc3'         | 0.29  | 1.15  | 0    | 3.13 | 0    | 0     | 0    | 0     | 0.57  | 0      |
| 66993 | 'Smarcd3'       | 14.68 | 4.43  | 8.57 | 12.1 | 17.4 | 12.82 | 10.3 | 16.77 | 12.13 | 7.13   |
| 66994 | 'Cep19'         | 65.07 | 43.28 | 41.7 | 81.9 | 40   | 54.1  | 71.3 | 64.22 | 46.09 | 78.77  |
| 66995 | 'Zcchc18'       | 825.2 | 993.1 | 812  | 981  | 754  | 795.7 | 880  | 1085  | 832.9 | 711.76 |
| 66997 | 'Psmid12'       | 114.2 | 122.4 | 125  | 138  | 142  | 151.5 | 86   | 137.9 | 108.5 | 119.46 |



|        |                 |       |       |      |      |      |       |      |       |       |        |
|--------|-----------------|-------|-------|------|------|------|-------|------|-------|-------|--------|
| 66998  | 'Psm5'          | 55.73 | 77.78 | 69.5 | 69.7 | 69.8 | 83.38 | 73.9 | 79.23 | 64.96 | 83.29  |
| 66999  | 'Med28'         | 53.84 | 52.84 | 40.2 | 76.5 | 63.2 | 66.37 | 43.2 | 63.05 | 54.91 | 67.69  |
| 67003  | 'Uqcr2'         | 141.9 | 183.2 | 200  | 136  | 153  | 184.3 | 211  | 224.5 | 158.8 | 197.75 |
| 67005  | 'Polr3k'        | 18.67 | 32.06 | 22   | 30.9 | 29.4 | 51.67 | 31.7 | 25.3  | 33.68 | 31.69  |
| 67006  | 'Cisd2'         | 35.8  | 34.23 | 24.9 | 28.3 | 16.8 | 18.71 | 29.5 | 25.71 | 26.27 | 29.19  |
| 67008  | 'Yae1d1'        | 9.86  | 11.6  | 5.41 | 0.02 | 12   | 29.11 | 12.1 | 11.79 | 8.68  | 21.03  |
| 67009  | 'Ttc23'         | 0     | 0     | 0    | 0    | 0    | 0     | 0    | 0     | 0     | 0.56   |
| 67010  | 'Rbm7'          | 23.74 | 15.57 | 8.04 | 35.3 | 21.3 | 22.93 | 15.1 | 27.8  | 13.81 | 23.58  |
| 67011  | 'Mettl6'        | 0.02  | 7.97  | 11.3 | 32.1 | 16.3 | 4.11  | 6.29 | 12.03 | 5.47  | 10.7   |
| 67013  | 'Oma1'          | 8.84  | 2.14  | 10   | 0.02 | 8    | 12.36 | 0.21 | 7.72  | 3.77  | 4.57   |
| 67014  | 'Riox2'         | 8.99  | 19.75 | 2.94 | 3.55 | 7.63 | 11.57 | 9.78 | 8.43  | 11.76 | 17.91  |
| 67015  | 'Ccxc91'        | 28.67 | 22.34 | 19.9 | 9.22 | 20.6 | 23.51 | 19.1 | 38.82 | 49.65 | 31.39  |
| 67016  | 'Tbc1d2b'       | 1.54  | 0.09  | 0    | 0.13 | 0.19 | 0     | 0.04 | 0.45  | 2.12  | 0      |
| 67017  | 'Fam210b'       | 6.39  | 3.52  | 5.59 | 14.7 | 8.55 | 10.98 | 4.32 | 9.23  | 4.22  | 6.43   |
| 67019  | 'Actr6'         | 25.9  | 35.12 | 20.2 | 31.2 | 25.6 | 10.51 | 15.1 | 24.07 | 38.01 | 40.36  |
| 67020  | 'Tmem88'        | 0.05  | 0.28  | 1.82 | 2.6  | 0.18 | 0.27  | 0.07 | 1.35  | 0.09  | 0.23   |
| 67023  | 'Use1'          | 104.7 | 87.48 | 72.9 | 118  | 75   | 94.48 | 68.5 | 92.63 | 109.9 | 120.56 |
| 67025  | 'Rpl11'         | 249.3 | 270.4 | 245  | 342  | 247  | 322.8 | 365  | 221.6 | 148.3 | 251.92 |
| 67026  | 'Thap4'         | 12.87 | 11.49 | 15.8 | 21.9 | 29.2 | 46.46 | 24   | 19    | 15.01 | 19.24  |
| 67027  | 'Mkrn2'         | 17.85 | 16.31 | 14.3 | 12.6 | 8.38 | 8.52  | 10.8 | 9.34  | 19.44 | 5.14   |
| 67028  | '2610002M06Rik' | 4.86  | 3.39  | 6.03 | 6.42 | 6.13 | 1.59  | 7.53 | 5.59  | 1.51  | 4.35   |
| 67030  | 'Fanc1'         | 7.51  | 12.08 | 7.13 | 0.14 | 13.1 | 6.87  | 0.6  | 4.23  | 6.2   | 5.44   |
| 67031  | 'Upf3a'         | 4     | 1.84  | 10.6 | 15.2 | 13.8 | 11.51 | 8.42 | 5.67  | 6.48  | 5.47   |
| 67035  | 'Dnajb4'        | 49.49 | 45.59 | 28.3 | 52.6 | 42.9 | 41.52 | 35.6 | 39.69 | 45.17 | 55.77  |
| 670358 | 'Gm9484'        | 0     | 1.82  | 0    | 0    | 0    | 0.25  | 0    | 1.35  | 0     | 0      |
| 67036  | 'Mrpl45'        | 22.86 | 23.18 | 40.6 | 34.4 | 31.4 | 33.37 | 35.4 | 43.62 | 35.97 | 51.22  |
| 67037  | 'Pmf1'          | 25.28 | 4.64  | 19.8 | 30.8 | 20.9 | 27.5  | 13.3 | 15.03 | 10.68 | 15.98  |
| 67038  | '2010109I03Rik' | 0     | 0     | 0    | 0    | 0    | 0     | 0    | 0     | 0.02  | 0      |
| 67039  | 'Rbm25'         | 41.24 | 33.51 | 30.9 | 40.9 | 41.3 | 48.08 | 47.6 | 34.4  | 32.28 | 26.68  |
| 67040  | 'Ddx17'         | 22.77 | 25.51 | 29   | 31.3 | 25   | 33.78 | 30.5 | 20.14 | 26.05 | 28.97  |
| 67041  | 'Oxct1'         | 47.07 | 36.63 | 61.1 | 41.9 | 44.9 | 37.8  | 55.1 | 41.26 | 29.68 | 32.59  |
| 67042  | 'Ift27'         | 48.7  | 55.19 | 58.1 | 63.8 | 62.6 | 60.85 | 53.2 | 64.3  | 70.98 | 80.42  |
| 67043  | 'Syap1'         | 5.46  | 4.84  | 1.01 | 12   | 2.16 | 3.85  | 2.09 | 2.93  | 1.96  | 0.57   |
| 67044  | 'Higd2a'        | 316.6 | 300.6 | 293  | 240  | 223  | 351.1 | 274  | 293.5 | 223.5 | 208.14 |
| 67045  | 'Riok2'         | 13.07 | 9.89  | 7.4  | 5.83 | 10.9 | 4.37  | 2.56 | 8.3   | 4.6   | 16.49  |
| 67046  | 'Tbc1d7'        | 32.28 | 26.07 | 34.9 | 53.6 | 54.1 | 22.63 | 30.2 | 16.81 | 28.67 | 17.19  |
| 67048  | 'Vma21'         | 12.27 | 18.68 | 16.4 | 27   | 12.3 | 18.14 | 12.3 | 19.94 | 15.12 | 17.9   |
| 67049  | 'Pus3'          | 10.2  | 3.63  | 6.32 | 0.6  | 7.31 | 0.77  | 6.03 | 8.92  | 11.99 | 5.03   |
| 67050  | 'Nkap'          | 3.77  | 4.46  | 3.76 | 7.04 | 2.66 | 7.1   | 2.35 | 4.35  | 2.83  | 4.17   |
| 67052  | 'Ndc80'         | 0     | 0     | 0.02 | 0    | 0    | 0.06  | 0    | 0.09  | 0     | 0      |
| 67053  | 'Rpp14'         | 21.97 | 11    | 23.7 | 33.8 | 18.8 | 16.45 | 2.12 | 15.99 | 9.68  | 15.89  |
| 67054  | 'Paics'         | 93.23 | 84.53 | 82.8 | 82.6 | 71.5 | 83.35 | 91.6 | 89.63 | 74.28 | 74.85  |
| 670558 | 'H60c'          | 0     | 0     | 0    | 0    | 0    | 0.52  | 0.09 | 0     | 0     | 0      |
| 67057  | 'Yaf2'          | 32.69 | 29.76 | 30.7 | 70.4 | 37.8 | 40.74 | 24.3 | 18.18 | 18.17 | 24.94  |
| 67059  | 'Ola1'          | 36.92 | 51.64 | 36.1 | 51.2 | 47.1 | 64.66 | 31.3 | 34.83 | 41.69 | 31.05  |
| 670593 | 'Gm9495'        | 0.03  | 0     | 0.02 | 0    | 0    | 1.24  | 0    | 0     | 0.04  | 0.01   |
| 67062  | 'Slc25a53'      | 0.9   | 1.06  | 1.28 | 1.36 | 1.5  | 1.47  | 1.35 | 1.31  | 2.62  | 1.4    |
| 67063  | 'Tmem246'       | 99.57 | 98.67 | 92.8 | 89.2 | 45.6 | 67.64 | 48.3 | 68.84 | 115.5 | 132.98 |
| 67064  | 'Chmp1b'        | 12.53 | 11.6  | 4.6  | 8.71 | 14.5 | 13.07 | 10.8 | 8     | 12.82 | 10.87  |
| 67065  | 'Polr3d'        | 19.45 | 24.31 | 11   | 11.4 | 16.7 | 20.58 | 12.5 | 14.34 | 16.54 | 23.17  |
| 67067  | 'Romo1'         | 286   | 305.7 | 337  | 514  | 194  | 427.7 | 295  | 153.6 | 418.2 | 236.6  |
| 67068  | 'Dynlrb1'       | 801   | 534.4 | 720  | 643  | 710  | 942.8 | 774  | 807.9 | 865.8 | 799.36 |
| 67070  | 'Lsm14a'        | 8.53  | 3.83  | 5.87 | 13   | 3.77 | 2.82  | 2.67 | 10.56 | 4.45  | 7.46   |
| 67071  | 'Rps6ka6'       | 7.12  | 2.26  | 2.77 | 0.14 | 0    | 0.63  | 3.81 | 1.73  | 4.63  | 11.21  |
| 67072  | 'Cdc3711'       | 31.82 | 14.2  | 18.1 | 9.79 | 30.9 | 11.9  | 28.1 | 13.98 | 11.98 | 5      |
| 67073  | 'Pi4k2b'        | 0     | 0     | 0    | 0    | 0.44 | 0     | 0    | 0     | 0     | 0      |
| 67074  | 'Mon2'          | 0.76  | 5.03  | 8.12 | 5.4  | 7.51 | 3.5   | 2.19 | 4.65  | 0.44  | 1.37   |
| 67075  | 'Magt1'         | 2.98  | 8.24  | 1.92 | 0.52 | 8.03 | 0.03  | 0.2  | 1.77  | 2.5   | 0.89   |

|        |                 |       |       |      |      |      |       |      |       |       |        |
|--------|-----------------|-------|-------|------|------|------|-------|------|-------|-------|--------|
| 67077  | 'Catsperz'      | 0     | 0     | 1.17 | 0    | 0    | 0     | 0    | 0     | 0     | 0      |
| 67078  | 'Pgp'           | 88.21 | 51.44 | 102  | 143  | 65.3 | 65.73 | 93.1 | 62.79 | 67.76 | 34.14  |
| 67080  | '1700019D03Rik' | 1.77  | 6.71  | 17.4 | 11.2 | 1.9  | 22.32 | 8.52 | 4.51  | 21.1  | 9.18   |
| 67082  | 'ccdc198'       | 0     | 1.23  | 0.32 | 0    | 0    | 0     | 1.28 | 0     | 0     | 0.37   |
| 67087  | 'Ctnnbip1'      | 3.7   | 7.35  | 11.9 | 31.1 | 5.43 | 0.42  | 4.23 | 2.85  | 6.54  | 5.35   |
| 67088  | 'Cand2'         | 0.78  | 1.16  | 2.42 | 2.2  | 0.17 | 0.11  | 0.03 | 1.65  | 6.73  | 4.94   |
| 67089  | 'Psmc6'         | 72.63 | 89.98 | 80.5 | 31.9 | 73.3 | 97.82 | 124  | 74.33 | 67.67 | 55.09  |
| 67091  | 'Trappc6a'      | 28.82 | 15.54 | 8.15 | 17.5 | 27.4 | 33.69 | 15.3 | 11.31 | 25.9  | 12.7   |
| 67092  | 'Gatm'          | 37.18 | 20.72 | 37.9 | 13.8 | 54.5 | 74.06 | 35.1 | 14.64 | 15.4  | 8.32   |
| 67095  | 'Trak1'         | 5.63  | 4.76  | 11.7 | 4.9  | 7.33 | 0.02  | 4.77 | 5.3   | 3.92  | 4.57   |
| 67096  | 'Mmachc'        | 22.49 | 2.62  | 5.75 | 18.6 | 23.6 | 24.6  | 1.96 | 18.52 | 13.23 | 19.29  |
| 67097  | 'Rps10'         | 177.7 | 182.9 | 173  | 157  | 236  | 247.3 | 130  | 134.5 | 125.6 | 203.06 |
| 67099  | 'Mettl21a'      | 12.7  | 15.61 | 8.99 | 0    | 12.6 | 5.52  | 8    | 8.81  | 13.04 | 5.5    |
| 67101  | '2310039H08Rik' | 26.62 | 18.84 | 19.7 | 25.2 | 27.2 | 30.55 | 10.7 | 29.72 | 9.87  | 18.88  |
| 67102  | 'D16Ert472e'    | 0     | 0.11  | 0    | 4.07 | 1.16 | 0.01  | 0.02 | 0.01  | 0     | 0.69   |
| 67103  | 'Ptgr1'         | 0     | 0     | 0    | 0    | 0    | 0     | 0    | 0     | 0     | 0.03   |
| 67105  | 'Timm21'        | 27.42 | 8.34  | 20.3 | 13.3 | 6.16 | 10.89 | 26   | 16.34 | 21.44 | 17.05  |
| 67106  | 'Zbtb8os'       | 39.58 | 7.58  | 13   | 42.8 | 47.9 | 34.89 | 31.8 | 21.37 | 14.19 | 41.36  |
| 67109  | 'Zfp787'        | 0.19  | 0.28  | 0.1  | 1.36 | 0.39 | 4.17  | 1.02 | 0.96  | 2.55  | 1.58   |
| 67111  | 'Naaa'          | 23.4  | 28.6  | 20.8 | 14.4 | 12.6 | 20.72 | 15.9 | 26.2  | 9.77  | 18.44  |
| 67112  | 'Fgf22'         | 8.25  | 7.89  | 11.8 | 15.9 | 23.5 | 44.53 | 4.96 | 8.95  | 15.84 | 6.89   |
| 67115  | 'Rpl14'         | 212.2 | 182.8 | 195  | 194  | 178  | 174   | 187  | 136.3 | 199.5 | 189.16 |
| 67116  | 'Cuedc2'        | 162.4 | 118.1 | 191  | 159  | 157  | 135.6 | 209  | 193.8 | 173.2 | 157.41 |
| 67117  | 'Dynlt3'        | 64.24 | 77.61 | 68.6 | 68.1 | 84.7 | 49.24 | 65   | 61.11 | 40.33 | 61.9   |
| 67118  | 'Bfar'          | 28    | 24.31 | 15   | 17.3 | 36.4 | 11.44 | 16.6 | 24.2  | 30.06 | 34.25  |
| 67119  | 'Ccdc159'       | 7.79  | 12.05 | 6.4  | 5.58 | 10.5 | 5.42  | 21.6 | 12.41 | 6.12  | 19.34  |
| 67120  | 'Ttc14'         | 18.71 | 26.34 | 18.9 | 11.3 | 18.3 | 14.73 | 19   | 10.32 | 22.76 | 6.43   |
| 67121  | 'Mastl'         | 0     | 0.05  | 0    | 0.01 | 0    | 0     | 0    | 0     | 0     | 0      |
| 67122  | 'Nrarp'         | 0     | 2.77  | 1.04 | 2.08 | 0    | 2.3   | 4.28 | 0.03  | 0     | 1.13   |
| 67123  | 'Ubap1'         | 25.94 | 21.93 | 26.3 | 31.9 | 22.4 | 20.8  | 28   | 30.5  | 8.45  | 28.93  |
| 67125  | 'Tspan31'       | 115.3 | 89.18 | 67.6 | 165  | 80.1 | 120.7 | 103  | 60.29 | 80.66 | 124.17 |
| 67126  | 'Atp5e'         | 364.6 | 367.9 | 485  | 561  | 337  | 472.4 | 385  | 235.6 | 335.8 | 326.83 |
| 67128  | 'Ube2g1'        | 2.82  | 3.78  | 1.37 | 8.51 | 2.75 | 3.5   | 3.09 | 5.18  | 0.02  | 1.65   |
| 67130  | 'Ndufa6'        | 476.7 | 393.8 | 489  | 513  | 418  | 763.7 | 512  | 386.6 | 499.5 | 428.34 |
| 67131  | 'Acbd4'         | 8.94  | 11.67 | 21.2 | 9.48 | 15.7 | 24.29 | 7.46 | 16.67 | 15.34 | 5.46   |
| 67134  | 'Nop56'         | 124.9 | 143.7 | 137  | 268  | 134  | 184.6 | 98   | 196.8 | 150.5 | 141.58 |
| 67136  | 'Kbtbd4'        | 39.76 | 42.25 | 54.3 | 27.3 | 40.6 | 37.88 | 31   | 26.61 | 27.2  | 51.15  |
| 67138  | 'Herc6'         | 0.11  | 0.13  | 0.31 | 2.34 | 0.09 | 0.02  | 0    | 0.01  | 2.89  | 1.23   |
| 67139  | 'Mis12'         | 9.28  | 11.36 | 9.41 | 18   | 19.6 | 11.82 | 0    | 3.82  | 14.16 | 1.59   |
| 67141  | 'Fbxo5'         | 2.6   | 1.58  | 0.35 | 6.85 | 2.27 | 0     | 1.95 | 0     | 0     | 3.01   |
| 67143  | 'Ikzf5'         | 0.68  | 0.66  | 4.4  | 5.38 | 1.66 | 6.04  | 0.01 | 3.6   | 1.53  | 8.43   |
| 67144  | 'Lrrc40'        | 12.32 | 17.72 | 19.1 | 14.4 | 17.6 | 14.6  | 23.8 | 10.45 | 17.54 | 15.51  |
| 67145  | 'Tomm34'        | 162.7 | 129   | 105  | 65.9 | 87.1 | 101.8 | 129  | 111.3 | 109.6 | 162.28 |
| 67148  | 'Ramac'         | 217.5 | 149.4 | 136  | 134  | 190  | 160.7 | 164  | 154.8 | 163.8 | 202.44 |
| 67149  | 'Nkain1'        | 1.22  | 6.35  | 0.47 | 0.67 | 7.79 | 0.02  | 4.31 | 6.65  | 0     | 1.86   |
| 67150  | 'Rnf141'        | 3.5   | 6.95  | 3.53 | 17.2 | 13.2 | 3.9   | 10.6 | 10.38 | 5.11  | 7.5    |
| 67151  | 'Psmc9'         | 33.74 | 30.22 | 32.9 | 18   | 16.3 | 28.19 | 25.5 | 31.83 | 23.02 | 21.55  |
| 67153  | 'Rnaseh2b'      | 10.5  | 13.51 | 16.7 | 7.07 | 14.4 | 27.41 | 14.4 | 21.36 | 14.8  | 13.96  |
| 671535 | 'Parp10'        | 0     | 0     | 0    | 5.92 | 0.53 | 0     | 0    | 0     | 0.58  | 3.08   |
| 67154  | 'Mtdh'          | 22.48 | 19.32 | 17.6 | 17.5 | 18.6 | 13.62 | 10.3 | 20.3  | 25.04 | 12.9   |
| 67155  | 'Smarca2'       | 76.91 | 60.84 | 72.4 | 115  | 58.6 | 58.2  | 52.6 | 63.53 | 60.31 | 46.43  |
| 67157  | '2610301B20Rik' | 65.03 | 71.63 | 56.1 | 89.2 | 70.4 | 69.21 | 53.9 | 59.39 | 33.03 | 67.96  |
| 67158  | 'Sft2d3'        | 1.6   | 1.54  | 0.27 | 9.23 | 0.85 | 0.02  | 1.03 | 0.21  | 0.98  | 0.23   |
| 67160  | 'Eef1g'         | 154.1 | 172.6 | 162  | 391  | 153  | 126.1 | 185  | 172.4 | 130   | 160.53 |
| 67161  | 'Sclt1'         | 5.22  | 0.69  | 2.08 | 2.24 | 5.59 | 2.46  | 3.56 | 0.19  | 1.75  | 0.22   |
| 67163  | 'Ccdc47'        | 57.85 | 42.74 | 63   | 54.1 | 64.2 | 60.53 | 58.1 | 54.2  | 75.78 | 65.26  |
| 67164  | 'Lipt2'         | 3.34  | 9.99  | 9.33 | 0    | 0.04 | 4.65  | 0    | 4.78  | 1.61  | 0      |
| 671650 | 'Gm20783'       | 0.23  | 0     | 0    | 0    | 0.03 | 0     | 0    | 0.08  | 0.04  | 0      |

|        |                 |       |       |      |      |      |       |      |       |       |        |
|--------|-----------------|-------|-------|------|------|------|-------|------|-------|-------|--------|
| 67166  | 'Arl8b'         | 86.45 | 77.72 | 89.6 | 49.1 | 69.2 | 62.57 | 105  | 71.99 | 56.95 | 60.83  |
| 67168  | 'Lpar6'         | 4.62  | 18.99 | 5.82 | 18   | 1.07 | 6.73  | 2.95 | 0     | 0.02  | 0.03   |
| 67169  | 'Nradd'         | 9.74  | 3.51  | 3.05 | 11.1 | 9.28 | 0     | 1.24 | 2.76  | 0.08  | 10.96  |
| 67171  | 'Dram2'         | 8.29  | 19.92 | 11.1 | 16.5 | 9.65 | 10.17 | 16.6 | 24.27 | 7.96  | 18.93  |
| 67177  | 'Cdt1'          | 0     | 3.53  | 0.15 | 0    | 0    | 5.55  | 0    | 2.05  | 0     | 0      |
| 67178  | 'Zmat5'         | 42.25 | 31.99 | 23.8 | 80.6 | 41.6 | 86.17 | 43.7 | 67.88 | 59.76 | 46.57  |
| 67179  | 'Ccdc25'        | 21.69 | 32.88 | 33.2 | 50.3 | 51.5 | 39.33 | 4.89 | 20.3  | 13.05 | 20.73  |
| 67180  | 'Yipf5'         | 45.48 | 44.36 | 35.7 | 46.6 | 29.2 | 34.72 | 33.5 | 33.65 | 36.76 | 31.26  |
| 67181  | 'Ctdnep1'       | 8.41  | 18.14 | 10.6 | 2.42 | 16.5 | 4.23  | 4.72 | 4.04  | 1.42  | 8.67   |
| 67182  | 'Pdzk1ip1'      | 0     | 6.53  | 1.9  | 0    | 0    | 0     | 0    | 0     | 0     | 0      |
| 67184  | 'Ndufa13'       | 469.3 | 531.4 | 533  | 575  | 586  | 887.6 | 626  | 412.9 | 656.9 | 656.55 |
| 67186  | 'Rplp2'         | 312   | 338.7 | 275  | 326  | 229  | 365.5 | 323  | 178.6 | 366.7 | 221.84 |
| 67187  | 'Zmynd19'       | 0.82  | 0     | 1.53 | 0    | 1.03 | 0     | 2.46 | 0.38  | 0     | 1.48   |
| 67196  | 'Ube2t'         | 2.72  | 3.44  | 0    | 0    | 0    | 0     | 0    | 0     | 5.38  | 0      |
| 67197  | 'Zcrb1'         | 83.03 | 79.05 | 104  | 110  | 128  | 104.1 | 135  | 113.2 | 132.6 | 126.08 |
| 67198  | 'Spats2l'       | 12.02 | 12.89 | 22.1 | 0.03 | 7.97 | 17.31 | 14.4 | 16.66 | 7.64  | 2.3    |
| 67199  | 'Pfdn1'         | 148.7 | 107.9 | 95.5 | 152  | 128  | 172.2 | 126  | 158.9 | 182.4 | 121.5  |
| 67200  | 'Ccdc77'        | 0.08  | 6.02  | 0    | 2.64 | 5.48 | 2.33  | 0    | 2.29  | 0.02  | 0.3    |
| 67201  | 'Glod4'         | 80.55 | 56.2  | 61.8 | 102  | 38   | 35.84 | 31.8 | 54.48 | 60.64 | 60.77  |
| 67203  | 'Nde1'          | 1.33  | 1.63  | 12.7 | 0.09 | 0    | 0.03  | 5.61 | 5.85  | 4.4   | 1.24   |
| 67204  | 'Eif2s2'        | 39.66 | 40.05 | 39.9 | 34.9 | 40.6 | 31.03 | 30.2 | 34.33 | 44.01 | 40.52  |
| 67205  | 'Utp11'         | 23.82 | 27.3  | 22.6 | 28.2 | 19.2 | 19.81 | 37.8 | 32.83 | 43.33 | 33.94  |
| 67207  | 'Lsm1'          | 29.11 | 33.85 | 31.3 | 32.3 | 38   | 43.23 | 25.2 | 37.16 | 38.82 | 27.15  |
| 67210  | 'Gatad1'        | 31.33 | 24.31 | 23.4 | 41.5 | 44.8 | 19.28 | 18.9 | 36.8  | 43.09 | 31.12  |
| 67211  | 'Armc10'        | 2.69  | 14.88 | 9.18 | 1.5  | 11.8 | 11.39 | 15.9 | 16.28 | 5.37  | 5.74   |
| 67212  | 'Mrpl55'        | 76.29 | 102.2 | 76.7 | 92.5 | 123  | 158.5 | 43   | 141.6 | 71.04 | 93.5   |
| 67213  | 'Cmtm6'         | 4.69  | 0.75  | 9.36 | 7.97 | 8.94 | 12.52 | 7    | 5.7   | 6.58  | 1.93   |
| 67216  | 'Mboat2'        | 16.23 | 25.55 | 18.5 | 11.9 | 4.62 | 10.46 | 14.9 | 14.19 | 7.45  | 9.46   |
| 67217  | 'L3hypdh'       | 0.03  | 8.59  | 1.22 | 2.73 | 6.08 | 2.61  | 2.17 | 7.52  | 7.08  | 9.89   |
| 67219  | 'Med18'         | 2.49  | 5.26  | 1.97 | 0.14 | 2.49 | 0     | 0    | 2.1   | 9.57  | 2      |
| 67220  | 'Plekho1'       | 11.05 | 0     | 0.05 | 0    | 8.58 | 2.63  | 7.62 | 0     | 9.28  | 4.84   |
| 67222  | 'Srfbp1'        | 13.6  | 6.38  | 8.54 | 12.5 | 4.78 | 1.82  | 13.8 | 21.78 | 5.13  | 14.55  |
| 67223  | 'Rrp15'         | 20.31 | 2.59  | 8.52 | 1.21 | 13   | 5.14  | 0.04 | 8.33  | 17.35 | 7.89   |
| 67224  | 'Med29'         | 36.49 | 27.13 | 28.2 | 18.5 | 16.4 | 34.2  | 40.6 | 27.43 | 27.48 | 32.99  |
| 67225  | 'Rnpc3'         | 24.91 | 20.59 | 26.6 | 36.5 | 26.7 | 19.24 | 23.6 | 19.35 | 31.35 | 21.23  |
| 67226  | 'Tmem19'        | 24.13 | 18.46 | 13   | 3.28 | 16.1 | 2.21  | 13.1 | 16.28 | 11.82 | 11.9   |
| 67228  | 'Dph7'          | 26.48 | 11.1  | 27.6 | 17   | 30.1 | 36.33 | 18.1 | 33.72 | 13.54 | 26.88  |
| 67229  | 'Prpf18'        | 27.45 | 20.95 | 24.7 | 18.5 | 20.7 | 11.63 | 11.2 | 15.94 | 17.94 | 20.4   |
| 67230  | 'Zfp329'        | 6.82  | 4.23  | 3.05 | 1.17 | 7.52 | 2.54  | 2.75 | 2.79  | 4.23  | 4.8    |
| 67231  | 'Tbc1d20'       | 5.51  | 7.72  | 4.35 | 15.4 | 9.94 | 0.01  | 0.03 | 8.79  | 5.09  | 6.58   |
| 67235  | 'Zkscan14'      | 3.71  | 10.03 | 12.9 | 21.5 | 4.23 | 7.97  | 9.9  | 18.85 | 5.25  | 11.53  |
| 67236  | 'Cinp'          | 39.4  | 25.73 | 14.9 | 39.3 | 29.2 | 37.48 | 47.5 | 20.53 | 13.47 | 25.81  |
| 67238  | 'Fam220a'       | 4.26  | 2.68  | 1.64 | 22.6 | 5.3  | 6.86  | 0.45 | 5.32  | 4.03  | 5.88   |
| 67239  | 'Rpf2'          | 10.72 | 22.33 | 26.4 | 37.6 | 24.9 | 53.28 | 22.5 | 37.06 | 33.92 | 30.73  |
| 67241  | 'Smc6'          | 15.26 | 15.4  | 13.4 | 7.48 | 18.3 | 7.49  | 9.05 | 18.96 | 7.95  | 17.73  |
| 67242  | 'Gemin6'        | 4.15  | 12.9  | 14.1 | 13   | 29.3 | 16.94 | 29.5 | 10.49 | 22.85 | 16.4   |
| 67245  | 'Peli1'         | 10.82 | 9.87  | 15.2 | 20.2 | 4.31 | 1.72  | 9.25 | 5.04  | 9.25  | 1.8    |
| 67246  | 'Resf1'         | 8.9   | 4.35  | 1.58 | 1.51 | 5.9  | 3.55  | 3.43 | 3.59  | 2.29  | 2.01   |
| 67247  | 'Marc2'         | 46.56 | 42.33 | 50.7 | 64.9 | 15   | 105.3 | 46.4 | 39.08 | 34.23 | 32.76  |
| 67248  | 'Rpl39'         | 66.07 | 126   | 158  | 104  | 73.3 | 166.9 | 71.8 | 44.4  | 105   | 50.41  |
| 67249  | 'Tbc1d19'       | 24.11 | 25.44 | 33.2 | 24.9 | 17.1 | 37.1  | 19.2 | 10.28 | 24.48 | 22.91  |
| 672511 | 'Rnf213'        | 0.22  | 0.02  | 0.09 | 1.33 | 0.54 | 0     | 1.39 | 0     | 0.46  | 0.13   |
| 67252  | 'Cap2'          | 40.59 | 38.33 | 43.5 | 28   | 36.8 | 29.19 | 19   | 37.5  | 52.49 | 29.57  |
| 67254  | '2900011O08Rik' | 157.1 | 172.5 | 279  | 179  | 257  | 337.8 | 238  | 228.5 | 177.4 | 224.43 |
| 67255  | 'Zfp422'        | 15.95 | 18.75 | 13.3 | 15.5 | 14.6 | 24.94 | 23.4 | 20.82 | 14.27 | 11.02  |
| 67260  | 'Cers4'         | 48.48 | 47.6  | 63.4 | 37.6 | 51.9 | 60.12 | 58.3 | 58.43 | 85.84 | 58.9   |
| 67263  | 'Zswim6'        | 0.01  | 1.05  | 0.86 | 5.53 | 0.05 | 0     | 2.38 | 0.89  | 0     | 0.01   |
| 67264  | 'Ndufb8'        | 729.5 | 657.8 | 871  | 1176 | 1001 | 1168  | 932  | 985.8 | 970.5 | 935.79 |

|        |                 |       |       |      |      |      |       |      |       |       |        |
|--------|-----------------|-------|-------|------|------|------|-------|------|-------|-------|--------|
| 67266  | 'Fam69a'        | 25.15 | 10.31 | 28.9 | 5.44 | 15   | 5.5   | 6.79 | 21.46 | 13.47 | 17.88  |
| 67267  | 'Uqcc2'         | 318.6 | 282.3 | 338  | 299  | 281  | 374.6 | 367  | 276.2 | 391   | 318.54 |
| 67268  | 'Myl12a'        | 18.51 | 23.85 | 12.2 | 20.3 | 36.9 | 20.55 | 14.7 | 20.9  | 4.86  | 11.47  |
| 672682 | 'Gm9573'        | 0     | 0     | 0    | 0    | 0    | 0.01  | 0    | 0     | 0     | 0      |
| 67269  | 'Agtpbp1'       | 10.61 | 10.82 | 8.03 | 17.7 | 2.4  | 1.35  | 3.62 | 5.76  | 3.27  | 7.55   |
| 67270  | 'Mrpl42'        | 180   | 152.1 | 272  | 200  | 188  | 383.1 | 259  | 190.6 | 318.9 | 211.92 |
| 67272  | 'Cmtm5'         | 51.39 | 60.14 | 17.2 | 21.5 | 70.8 | 46.95 | 35.3 | 31.98 | 16.21 | 5.18   |
| 67273  | 'Ndufa10'       | 196.2 | 169.6 | 222  | 119  | 178  | 231.4 | 167  | 231.7 | 186.9 | 187.85 |
| 67276  | 'Eri1'          | 0.39  | 2.45  | 1.05 | 1.4  | 0.41 | 3.17  | 0.01 | 0.42  | 1.91  | 1.82   |
| 67278  | 'Pagr1a'        | 45.86 | 61.33 | 45   | 47.6 | 18.3 | 39.69 | 15.2 | 54.92 | 43.76 | 67.91  |
| 67279  | 'Med31'         | 46    | 54.58 | 45.2 | 45.7 | 51.7 | 59.14 | 24.4 | 26.67 | 56.13 | 55.05  |
| 67281  | 'Rpl37'         | 73.62 | 86.33 | 105  | 125  | 50.6 | 92.94 | 78.5 | 34.09 | 54.8  | 43.3   |
| 67282  | 'Washc3'        | 27.55 | 22.75 | 24.9 | 44.5 | 24.9 | 33.58 | 23.5 | 33.27 | 39.79 | 28.08  |
| 67283  | 'Slc25a19'      | 27.64 | 31.51 | 18.8 | 68.7 | 21.8 | 23.49 | 24.1 | 39.03 | 23.86 | 22.58  |
| 67285  | 'Cwc27'         | 25.48 | 9.48  | 17.3 | 50.8 | 26.9 | 25.86 | 15.6 | 19.45 | 23.51 | 20     |
| 67286  | 'lft22'         | 206.6 | 155.7 | 129  | 169  | 210  | 312.2 | 200  | 159.5 | 111   | 218.13 |
| 67287  | 'Parp6'         | 16.56 | 19.18 | 37.2 | 15.3 | 19.7 | 6.87  | 16.8 | 18.79 | 38.59 | 28.21  |
| 67288  | 'Srek1ip1'      | 7.85  | 15.47 | 5.84 | 0    | 6.73 | 3.99  | 13.5 | 9.32  | 11.95 | 15.71  |
| 67290  | '3110040N11Rik' | 32.37 | 25.16 | 36   | 23.5 | 30.7 | 31.99 | 17.4 | 38.73 | 15.51 | 23.78  |
| 67291  | 'Ccdc137'       | 9.49  | 30.33 | 17.9 | 15.7 | 20.6 | 28.32 | 2.27 | 10.45 | 27.68 | 12.53  |
| 67292  | 'Pigc'          | 4.94  | 6.7   | 1.25 | 0    | 10   | 5.09  | 6.16 | 2.37  | 2.53  | 1.74   |
| 67295  | 'Rab3c'         | 129.8 | 130.6 | 57   | 24.7 | 65   | 49.52 | 37.9 | 96.09 | 75.32 | 92.46  |
| 67296  | 'Socs4'         | 0     | 0     | 0    | 0    | 1.87 | 0     | 0    | 0.39  | 0     | 0      |
| 67298  | 'Gprasp1'       | 169.6 | 135   | 197  | 220  | 92.9 | 55.77 | 164  | 123.7 | 205.7 | 213.04 |
| 67299  | 'Dock7'         | 3.31  | 2.27  | 3.5  | 3.03 | 1.77 | 1.22  | 4.76 | 1.41  | 2.4   | 4.06   |
| 67300  | 'Cltc'          | 29.13 | 18.39 | 69.1 | 37.9 | 29.7 | 16.29 | 30.1 | 20.71 | 40.21 | 44.13  |
| 67302  | 'Zc3h13'        | 14.03 | 15.74 | 9.59 | 25.2 | 18.9 | 9.04  | 16.9 | 14.51 | 11.71 | 16.59  |
| 67305  | 'Gpx7'          | 3.31  | 14.13 | 6.85 | 14.4 | 3.69 | 8.42  | 10.7 | 9.71  | 8.41  | 16.32  |
| 67306  | 'Zc2hc1a'       | 36.89 | 25.74 | 28.3 | 15.1 | 40.4 | 29.23 | 23.1 | 32.38 | 40.36 | 30.49  |
| 67307  | 'Pbld2'         | 0.02  | 0     | 3.46 | 0    | 0    | 3.74  | 0    | 0.52  | 0     | 0      |
| 67308  | 'Mrpl46'        | 75.44 | 53.95 | 74.3 | 39   | 90.6 | 89.32 | 76.1 | 84.57 | 49.91 | 70.73  |
| 673094 | 'Cd99'          | 0.31  | 0     | 0    | 0    | 0    | 0     | 0.33 | 0     | 0.3   | 0      |
| 67311  | 'Nanp'          | 29.86 | 38.01 | 32   | 0.13 | 35.7 | 30.06 | 10.9 | 50.71 | 20.5  | 27.18  |
| 67313  | 'Inava'         | 0     | 0     | 1.27 | 0.07 | 0    | 0     | 7.1  | 0     | 0     | 0      |
| 67317  | '1700022I11Rik' | 0     | 0     | 0.18 | 0    | 0    | 0     | 3.59 | 0     | 0     | 0      |
| 67323  | '1700042G07Rik' | 0     | 0     | 0    | 0    | 0    | 0     | 0    | 0     | 0     | 0.26   |
| 67326  | '1700037H04Rik' | 259.7 | 187.9 | 227  | 384  | 209  | 209.8 | 175  | 214.6 | 282.6 | 240.07 |
| 67331  | 'Atp8b3'        | 1.73  | 0     | 0.03 | 0    | 2.15 | 0     | 0    | 0     | 1.14  | 1.87   |
| 67332  | 'Snrpd3'        | 205.6 | 188.2 | 189  | 36.6 | 209  | 265.6 | 137  | 241   | 256   | 247.71 |
| 67333  | 'Stk35'         | 2.47  | 1.42  | 0.81 | 0.66 | 1.89 | 0.76  | 0    | 0.07  | 0.17  | 0.91   |
| 67337  | 'Cstf1'         | 15.7  | 14.22 | 9.91 | 0    | 11.9 | 16.09 | 17.4 | 10.69 | 20.49 | 18.95  |
| 67338  | 'Rffl'          | 4.03  | 4.76  | 6.11 | 0    | 2.77 | 0.03  | 0    | 1.52  | 3.36  | 2.43   |
| 67341  | 'Ascl4'         | 0     | 0     | 0    | 0    | 0    | 0.28  | 4.44 | 0     | 0     | 0      |
| 67343  | 'Tex43'         | 0     | 0     | 0    | 9.7  | 0    | 0     | 0    | 0     | 0     | 0      |
| 67344  | 'Tctex1d1'      | 1.72  | 0     | 0.73 | 12.1 | 0    | 0     | 0    | 1.93  | 0     | 0      |
| 67345  | 'Herc4'         | 2.7   | 2.29  | 6.08 | 16.6 | 7.33 | 1.08  | 3.95 | 1.13  | 3.57  | 6.78   |
| 67356  | 'Tmco5'         | 0     | 0     | 0.62 | 0    | 0    | 0     | 4.83 | 0     | 0     | 1.81   |
| 67358  | '1700093K21Rik' | 0     | 0     | 1.24 | 0    | 0    | 0     | 0.57 | 0     | 0     | 0      |
| 67367  | 'Paxbp1'        | 6     | 2.56  | 9.3  | 10.2 | 6.25 | 4.65  | 6.98 | 7.23  | 12.31 | 8.15   |
| 67369  | 'Qpctl'         | 26.91 | 34.41 | 20.7 | 13   | 25.5 | 12.69 | 19.1 | 30.23 | 18.76 | 22.46  |
| 67370  | 'Zfp606'        | 1.14  | 3.68  | 4.5  | 6.05 | 4.99 | 4.82  | 0.04 | 7.12  | 7.59  | 9.31   |
| 67371  | 'Gtf3c6'        | 33.31 | 36.9  | 33.9 | 16.1 | 54.7 | 51.21 | 30.2 | 32.69 | 53.17 | 18.3   |
| 67374  | 'Jam2'          | 12.93 | 5.16  | 7.4  | 1.03 | 0.14 | 3.16  | 10.2 | 7.03  | 0     | 0      |
| 67375  | 'Qprt'          | 0     | 5.3   | 0    | 0    | 0    | 0     | 0    | 0     | 0     | 0      |
| 67378  | 'Bbs2'          | 14.53 | 13.99 | 11.6 | 8.27 | 5.18 | 9.09  | 7.49 | 16.05 | 18.56 | 25.37  |
| 67379  | 'Dedd2'         | 12.97 | 6.46  | 0.08 | 13.9 | 11.1 | 10.81 | 10.4 | 16.93 | 3.4   | 6.1    |
| 67381  | 'Med4'          | 55.71 | 26.67 | 24.5 | 32.8 | 16   | 48.01 | 39.7 | 46.45 | 11.77 | 18.26  |
| 67382  | 'Brd3'          | 29.91 | 23.69 | 25.2 | 38.1 | 26.4 | 20.52 | 20.2 | 19.93 | 19.46 | 19.59  |

|       |                 |       |       |      |      |      |       |      |       |       |        |
|-------|-----------------|-------|-------|------|------|------|-------|------|-------|-------|--------|
| 67383 | 'Carnmt1'       | 0.04  | 1.06  | 0.29 | 3.08 | 1.49 | 0.7   | 0.77 | 1.26  | 0.72  | 0      |
| 67384 | 'Bag4'          | 9.45  | 5.7   | 7.41 | 8.04 | 1.22 | 3.47  | 6.74 | 6.52  | 7.4   | 4.09   |
| 67387 | 'Unc50'         | 99.58 | 91.16 | 61.8 | 42.1 | 72   | 108.2 | 112  | 134.3 | 67.39 | 82     |
| 67388 | 'Rab5if'        | 9.99  | 8.73  | 4.77 | 48.7 | 9.33 | 0.05  | 15.1 | 15.59 | 0.89  | 8.53   |
| 67389 | 'C1qtnf12'      | 3.44  | 5.78  | 4.04 | 0.66 | 14.5 | 4.91  | 0.19 | 14.49 | 10.81 | 0      |
| 67390 | 'Mrm3'          | 29.03 | 17.94 | 23.2 | 37.2 | 22.3 | 38.35 | 53.1 | 31.95 | 37.99 | 30.73  |
| 67391 | 'Fundc2'        | 9.51  | 18.52 | 15.9 | 21.8 | 10.3 | 8.61  | 17.2 | 8.96  | 2.87  | 10.48  |
| 67392 | '4833420G17Rik' | 10.84 | 8.63  | 14.4 | 26.6 | 10.9 | 9.88  | 29.5 | 22.05 | 11.11 | 4.3    |
| 67393 | 'Cxxc5'         | 8.35  | 7.59  | 1.72 | 19.5 | 20.3 | 10.15 | 7.52 | 10.87 | 16.23 | 21.04  |
| 67397 | 'Erp29'         | 196.5 | 286.9 | 185  | 185  | 180  | 250.7 | 143  | 140.3 | 246   | 294.88 |
| 67398 | 'Sprpr'         | 57.88 | 69.93 | 55.4 | 33.7 | 52.2 | 65.14 | 51.9 | 47.97 | 76.33 | 79.89  |
| 67399 | 'Pdlim7'        | 96.92 | 156.2 | 80   | 145  | 216  | 145.8 | 131  | 184.2 | 104.6 | 156.7  |
| 67405 | 'Nts'           | 576.8 | 349.5 | 171  | 207  | 0.3  | 0.28  | 18.1 | 1960  | 93.77 | 0.37   |
| 67412 | 'Soga3'         | 49.73 | 47.18 | 43.6 | 39   | 54.5 | 54.31 | 49   | 33.47 | 48.36 | 58.72  |
| 67414 | 'Mfn1'          | 2.63  | 7.9   | 3.68 | 7.95 | 3.97 | 13.13 | 4.24 | 5.67  | 0.9   | 5.25   |
| 67416 | 'Armcx2'        | 38.8  | 47.03 | 58.8 | 26   | 47.7 | 20.64 | 84.1 | 33.99 | 39.86 | 33.84  |
| 67417 | 'Ears2'         | 2.47  | 3.81  | 2.64 | 4.45 | 0.33 | 3.55  | 0.36 | 1.74  | 4.34  | 1.3    |
| 67418 | 'Ppil4'         | 28.22 | 25.28 | 20.1 | 58.1 | 31   | 43.44 | 38   | 32.27 | 35.21 | 54.2   |
| 67419 | 'Armh4'         | 7.94  | 3.26  | 16.2 | 5.44 | 50.1 | 30.37 | 63.4 | 27.67 | 22.94 | 25.79  |
| 67420 | 'Far1'          | 21.38 | 16.37 | 21   | 20.8 | 9.79 | 10.92 | 12.4 | 17.05 | 19.01 | 18.36  |
| 67422 | 'Dhdds'         | 26.13 | 28.78 | 18   | 16.5 | 9.14 | 28.37 | 20.7 | 20.39 | 22.89 | 26.03  |
| 67425 | 'Eps8l1'        | 5.6   | 10.31 | 2.56 | 1.71 | 5.19 | 4.48  | 5.98 | 0     | 3.87  | 4.66   |
| 67426 | 'Coq8a'         | 22.86 | 6.78  | 21.5 | 23.9 | 29.1 | 53.39 | 26.6 | 19.19 | 13.65 | 25.44  |
| 67427 | 'Rps20'         | 13.58 | 20.45 | 20.2 | 20.2 | 15.3 | 21.75 | 11.7 | 8.41  | 11.9  | 13.5   |
| 67429 | 'Nudcd1'        | 11.51 | 10.04 | 3.35 | 2.27 | 11.5 | 6.97  | 15.3 | 8.13  | 14.96 | 5.28   |
| 67430 | '4921536K21Rik' | 0     | 0     | 0    | 6.07 | 0    | 0.42  | 0    | 0.36  | 0.21  | 0.05   |
| 67432 | 'Hoga1'         | 1.58  | 1.22  | 1.25 | 32.5 | 0.03 | 5.36  | 8    | 0.02  | 0     | 0      |
| 67433 | 'Ccdc127'       | 25.88 | 19.15 | 12.9 | 16.4 | 17.7 | 20.94 | 11.6 | 10.93 | 24.64 | 16.79  |
| 67434 | 'Ankrd33b'      | 0     | 0     | 0.01 | 0    | 0    | 0.88  | 4.25 | 0     | 0     | 0      |
| 67437 | 'Ssr3'          | 65.18 | 90.43 | 49.4 | 42.5 | 45.6 | 29.89 | 43.5 | 54.74 | 53.26 | 56.4   |
| 67439 | 'Xab2'          | 27.84 | 35.83 | 41.5 | 9.77 | 24.6 | 31.25 | 20   | 40.93 | 28.82 | 18.77  |
| 67440 | 'Mtpap'         | 12.14 | 17.11 | 9.03 | 11.4 | 3.93 | 15.4  | 14.9 | 16.15 | 12.57 | 18.83  |
| 67441 | 'Isoc2b'        | 3.68  | 1.63  | 0    | 0    | 9.53 | 12.4  | 2.12 | 4.44  | 3.67  | 3.98   |
| 67442 | 'Retsat'        | 5.88  | 8.75  | 8.69 | 6.43 | 0    | 0     | 0    | 2.76  | 0.02  | 3.24   |
| 67443 | 'Map1lc3b'      | 283.1 | 304   | 253  | 282  | 277  | 404.4 | 264  | 315.4 | 302.6 | 269.1  |
| 67444 | 'Ilkap'         | 56.24 | 73.27 | 19.7 | 38.7 | 71.6 | 24.61 | 67.3 | 40.96 | 53.6  | 26.54  |
| 67445 | 'C1qtnf4'       | 18.31 | 28.74 | 33.4 | 40.9 | 23.6 | 40.18 | 37.5 | 17.18 | 31.09 | 34.46  |
| 67446 | 'Dusp28'        | 37.76 | 27.38 | 48.9 | 29   | 16.7 | 30.55 | 26.8 | 24.64 | 26.06 | 24.24  |
| 67448 | 'Plxdc2'        | 8.44  | 6.94  | 6.37 | 1.99 | 10.9 | 8.6   | 3.48 | 5.19  | 3.98  | 3.13   |
| 67451 | 'Pkp2'          | 0.03  | 2.95  | 3.91 | 0.64 | 2.89 | 0     | 0.02 | 1.54  | 0.03  | 1.36   |
| 67452 | 'Pnpla8'        | 20.26 | 24.34 | 23.7 | 18   | 10.1 | 8.94  | 14.9 | 11.35 | 31.44 | 22.17  |
| 67453 | 'Slc25a46'      | 50.31 | 50.43 | 27.9 | 27.9 | 33.2 | 24.43 | 43.7 | 44.98 | 50.71 | 50.93  |
| 67454 | 'Ikbip'         | 7.02  | 20.54 | 6.93 | 7.95 | 10.1 | 23.48 | 11.6 | 20.66 | 27.01 | 15.48  |
| 67455 | 'Klhl13'        | 88.31 | 25.32 | 72.8 | 62.5 | 31.6 | 31.22 | 10.2 | 49.63 | 36.23 | 15.01  |
| 67456 | 'Ergic2'        | 44.45 | 44.86 | 28.3 | 23.4 | 27.5 | 20.49 | 41.6 | 46.48 | 32.98 | 34.99  |
| 67457 | 'Frmf8'         | 3     | 3.16  | 7.34 | 0    | 3.14 | 14.17 | 0.47 | 5.1   | 2.24  | 2.62   |
| 67458 | 'Ergic1'        | 124.7 | 84.95 | 83.2 | 43.5 | 58.3 | 47.26 | 46.8 | 92.76 | 106.8 | 98.75  |
| 67459 | 'Nvl'           | 18.27 | 10.4  | 11.4 | 20.1 | 21.6 | 10.53 | 8.31 | 15.41 | 13.06 | 14.69  |
| 67460 | 'Decr1'         | 7.18  | 2.64  | 5.41 | 3.72 | 8.3  | 2.37  | 4.22 | 8.03  | 7.21  | 0.26   |
| 67463 | 'Poc5'          | 6.45  | 6.85  | 4.92 | 6.58 | 14   | 14.21 | 20.8 | 21.79 | 4.54  | 9.83   |
| 67464 | 'Entpd4'        | 9.58  | 16.09 | 35   | 10   | 14   | 17.89 | 29.1 | 14.03 | 22    | 3.93   |
| 67465 | 'Sf3a1'         | 18.26 | 19.46 | 12.3 | 12.5 | 7.57 | 10.34 | 13.6 | 13.53 | 24.18 | 24.58  |
| 67466 | 'Pdcl'          | 18.81 | 4.33  | 6.59 | 5.12 | 7.13 | 6.8   | 10.8 | 1.67  | 9.22  | 8.54   |
| 67467 | 'Gpalpp1'       | 3.2   | 7.03  | 7.31 | 9.34 | 6.11 | 0.33  | 0.12 | 10.33 | 7.58  | 5.03   |
| 67468 | 'Mmd'           | 23.09 | 31.66 | 20.7 | 49.1 | 13.7 | 10.32 | 18.7 | 32.73 | 15.41 | 17.83  |
| 67469 | 'Abhd5'         | 0     | 3.16  | 2.67 | 0    | 8.78 | 0.31  | 2.89 | 2.95  | 5.81  | 1.73   |
| 67471 | 'Gpatch1'       | 11.46 | 22.18 | 17.3 | 7.84 | 22   | 14.6  | 9.21 | 23.3  | 14.48 | 13     |
| 67472 | 'Mtrf1'         | 10.49 | 9.36  | 5.87 | 5.3  | 9.66 | 6.82  | 2.41 | 2.21  | 5.5   | 6.77   |

|        |                 |       |       |      |      |      |       |      |       |       |        |
|--------|-----------------|-------|-------|------|------|------|-------|------|-------|-------|--------|
| 67473  | 'Slc47a1'       | 0.02  | 0     | 0    | 0    | 0    | 0     | 0    | 0     | 0     | 0.02   |
| 67474  | 'Snap29'        | 5     | 3.73  | 4.39 | 0    | 4.92 | 1.11  | 0    | 6.44  | 3.28  | 7.16   |
| 67475  | 'Ero1lb'        | 9.75  | 14.06 | 16.2 | 16.7 | 11.2 | 0.34  | 24.7 | 2.31  | 16.3  | 8.68   |
| 67477  | 'Abhd15'        | 0     | 0     | 0    | 0    | 0    | 2.22  | 0    | 1.89  | 0.01  | 0      |
| 67480  | 'Cwc25'         | 4.75  | 14.01 | 7    | 9.8  | 6.28 | 4.53  | 6.13 | 3.1   | 10.76 | 5.76   |
| 67483  | '1700028P14Rik' | 0     | 0     | 0    | 4.76 | 0.89 | 7.04  | 0    | 0     | 0     | 3.36   |
| 67484  | 'Eepd1'         | 4.82  | 13.4  | 5.86 | 0    | 6.79 | 1.07  | 8.12 | 6.24  | 4     | 3.69   |
| 674842 | 'Gm9631'        | 0.22  | 0     | 0.12 | 0.71 | 0.35 | 1.09  | 0    | 0.21  | 0.84  | 0.49   |
| 67486  | 'Polr3g'        | 0.8   | 0     | 0.84 | 6.85 | 0.69 | 2.27  | 0    | 2.48  | 3.38  | 3.11   |
| 67487  | 'Dhx40'         | 8.14  | 10.78 | 9.18 | 5.02 | 3.61 | 0     | 0.03 | 5.85  | 8.33  | 9.13   |
| 67488  | 'Calcoco1'      | 19.07 | 12.83 | 20.4 | 30.6 | 10.9 | 10.17 | 19.9 | 21.12 | 24.88 | 21.25  |
| 67489  | 'Ap4b1'         | 6.28  | 22.28 | 10   | 6.32 | 12.1 | 4.11  | 0.5  | 8.19  | 7.11  | 12.76  |
| 674895 | 'Nek10'         | 1.15  | 2.77  | 3.66 | 4.66 | 0.51 | 0.98  | 0.39 | 1.53  | 0.01  | 3.57   |
| 67490  | 'Ufl1'          | 19.27 | 16.9  | 19   | 25.8 | 20.8 | 13.89 | 10.9 | 20.55 | 20.82 | 25.2   |
| 67492  | 'Zfand4'        | 3.75  | 1.89  | 0.61 | 10.7 | 0    | 2.28  | 1.38 | 3.92  | 2.45  | 2.11   |
| 67493  | 'Mettl16'       | 34.64 | 20.38 | 22.8 | 15.7 | 20.8 | 23.24 | 20.2 | 29.04 | 31.35 | 34.53  |
| 67495  | 'Tmem167b'      | 14.81 | 19.56 | 19.9 | 41.8 | 16.4 | 28.19 | 28.1 | 26.63 | 16.83 | 13.29  |
| 67498  | 'Kcnv1'         | 1.53  | 4.25  | 0.95 | 0.01 | 0.03 | 0.02  | 0.01 | 0.01  | 0.01  | 0.02   |
| 67500  | 'Ccar1'         | 29.21 | 24.14 | 23.4 | 16.9 | 9.27 | 11.29 | 21.5 | 13.59 | 16.89 | 14.8   |
| 67501  | 'Ccadc50'       | 4.68  | 3.85  | 4.81 | 1.78 | 5.7  | 2.45  | 5.5  | 5.87  | 2.4   | 2.17   |
| 67504  | 'Rnf151'        | 0     | 0     | 0    | 0    | 0    | 0     | 2.5  | 0     | 0     | 0      |
| 67509  | 'Saysd1'        | 12.84 | 18.5  | 4.54 | 7.22 | 16.1 | 24.37 | 28.4 | 16.53 | 37.8  | 21.93  |
| 67510  | 'Tvp23b'        | 53.82 | 36.99 | 42.2 | 24.4 | 47.4 | 28.74 | 23.5 | 17.99 | 74.49 | 67.16  |
| 67511  | 'Tmed9'         | 187.5 | 151.8 | 136  | 179  | 204  | 252.4 | 200  | 217.4 | 248.4 | 253.97 |
| 67512  | 'Agpat2'        | 0     | 0     | 1.2  | 0    | 5.57 | 0     | 0    | 0     | 1.13  | 0.96   |
| 67513  | 'Faap20'        | 43.99 | 46.47 | 33.6 | 112  | 38.8 | 61.71 | 20.9 | 40.61 | 32.8  | 46.07  |
| 67515  | 'Ttc33'         | 85.53 | 88.87 | 60.5 | 69.6 | 68.8 | 73.12 | 42.1 | 64.86 | 103.5 | 45.04  |
| 67516  | 'Kctd4'         | 6.55  | 1.7   | 3.3  | 4.58 | 5.5  | 5.6   | 8.75 | 1.37  | 0.34  | 1.05   |
| 67525  | 'Trim62'        | 1.78  | 0.13  | 1.62 | 13.3 | 3.98 | 0.17  | 3.7  | 5.56  | 0     | 0      |
| 67526  | 'Atg12'         | 38.49 | 47.61 | 24.7 | 49.6 | 27.1 | 63.03 | 29.3 | 36.99 | 26.08 | 21.38  |
| 67528  | 'Nudt7'         | 14.98 | 2.88  | 9.96 | 19.9 | 19.3 | 9.09  | 0.06 | 9.65  | 9.53  | 16.8   |
| 67529  | 'Fgfr1op2'      | 44.82 | 49.79 | 30.6 | 18.7 | 48.2 | 31.82 | 29.7 | 38.89 | 85.8  | 54.07  |
| 67530  | 'Uqcrb'         | 396.5 | 398.4 | 507  | 502  | 337  | 479.8 | 379  | 353.6 | 507.5 | 392.45 |
| 67532  | 'Mfap1a'        | 29.01 | 26    | 23.3 | 28.4 | 21.7 | 21.02 | 16.7 | 24.86 | 23    | 18.08  |
| 67533  | 'Ppfibp1'       | 1.73  | 5.26  | 2.1  | 1.94 | 0.96 | 0.02  | 11   | 0.49  | 2.74  | 3.96   |
| 67534  | 'Till4'         | 0.2   | 0     | 0.01 | 3.19 | 0    | 0.1   | 0    | 0.14  | 1     | 0.56   |
| 67538  | 'Zswim3'        | 4.19  | 1.81  | 6.64 | 0    | 0.29 | 5.62  | 5.93 | 11.7  | 3.39  | 3.55   |
| 67542  | 'Cog6'          | 19.75 | 27.46 | 30.9 | 14.8 | 10.3 | 12.25 | 19.4 | 24.78 | 27.78 | 23.56  |
| 67543  | 'Pabpc6'        | 0     | 0     | 0    | 0    | 0    | 0     | 0    | 0     | 0     | 0.01   |
| 67544  | 'Fam120b'       | 35.26 | 34.2  | 32   | 17.6 | 40.9 | 16.56 | 30.5 | 27.4  | 30.77 | 34.69  |
| 67547  | 'Slc39a8'       | 0     | 0     | 0    | 0    | 0.76 | 0     | 0.56 | 1.9   | 0.82  | 1      |
| 67549  | 'Gpr89'         | 20.35 | 29.62 | 24.5 | 8.68 | 13.2 | 9.98  | 18   | 17.7  | 16.88 | 16.46  |
| 67553  | 'Gstcd'         | 2.06  | 0.51  | 0.21 | 0    | 1.75 | 0.27  | 2.81 | 2.47  | 1.39  | 0      |
| 67554  | 'Slc25a30'      | 7.81  | 4.34  | 3.56 | 0    | 1.08 | 0     | 0    | 1.92  | 0     | 0.04   |
| 67556  | 'Pigm'          | 0.01  | 0.72  | 0.5  | 7.24 | 0.09 | 0.04  | 0.1  | 0.02  | 0.89  | 0.46   |
| 67557  | 'Larp6'         | 3.1   | 4.77  | 5.76 | 13.4 | 2.04 | 4.04  | 0.28 | 10.04 | 4.35  | 8.76   |
| 67561  | 'Wdr48'         | 18.09 | 23.63 | 19.7 | 8.3  | 18.8 | 12.89 | 12.8 | 24.36 | 21.21 | 28.94  |
| 67563  | 'Narfl'         | 31.8  | 20.65 | 16.4 | 17.3 | 22.6 | 24.79 | 18.3 | 28.23 | 25.77 | 14.5   |
| 67564  | 'Tmem35a'       | 151.2 | 97.57 | 25.3 | 21.8 | 22.8 | 34.74 | 74.1 | 78.99 | 10.9  | 3.21   |
| 67568  | 'Mrfap1'        | 632   | 588.9 | 422  | 704  | 437  | 652.3 | 600  | 444.5 | 454.2 | 335.56 |
| 67569  | 'Mgat4c'        | 3.25  | 13.54 | 14.8 | 3.31 | 3.2  | 1.74  | 10.2 | 11.52 | 1.42  | 1.93   |
| 67574  | 'Alg13'         | 1.22  | 1.06  | 6.13 | 0    | 0.27 | 0     | 1.63 | 1.9   | 10.48 | 2.26   |
| 67578  | 'Patl2'         | 0     | 0     | 0    | 0    | 0    | 0     | 0    | 0     | 0.19  | 0      |
| 67579  | 'Cpeb4'         | 1.25  | 4.7   | 2.15 | 11.8 | 3.69 | 2.51  | 2.92 | 1.85  | 4.22  | 5.09   |
| 67581  | 'Tbc1d23'       | 11.7  | 8.29  | 8.81 | 11.4 | 11.9 | 14.78 | 6.05 | 7.55  | 11    | 4.69   |
| 675812 | 'Zfp605'        | 1.87  | 6.11  | 3.61 | 2.05 | 5.15 | 2.86  | 3.45 | 7.16  | 8.01  | 3.48   |
| 67582  | 'Slc25a26'      | 3.21  | 7.52  | 9.73 | 9.22 | 7.66 | 6.61  | 12.6 | 12.51 | 6.03  | 11.56  |
| 67586  | 'Ubxn11'        | 14.31 | 6.05  | 2.27 | 0    | 42.2 | 16.91 | 25.6 | 10.52 | 4.36  | 23.26  |

|       |                 |       |       |      |      |      |       |      |       |       |        |
|-------|-----------------|-------|-------|------|------|------|-------|------|-------|-------|--------|
| 67588 | 'Rnf41'         | 48.3  | 38.88 | 42.7 | 25.6 | 58.7 | 35.22 | 53   | 51.72 | 69.23 | 47.04  |
| 67590 | 'Tctn3'         | 11.51 | 16.37 | 14   | 10   | 18.4 | 11.73 | 20.5 | 17.77 | 18.06 | 16.08  |
| 67592 | '4930524B15Rik' | 0     | 0     | 1.87 | 0    | 0    | 0     | 0    | 0     | 1.82  | 0      |
| 67593 | '4930519G04Rik' | 0     | 0.07  | 0.17 | 0.18 | 0.08 | 0.05  | 0.05 | 0.1   | 0.04  | 0.03   |
| 67602 | 'Necap1'        | 182   | 162.6 | 207  | 179  | 143  | 124.7 | 276  | 230.4 | 182.8 | 187.49 |
| 67603 | 'Dusp6'         | 16.52 | 23.06 | 27.9 | 44.5 | 0.07 | 16.49 | 21.2 | 19.08 | 4.89  | 10.28  |
| 67604 | 'Get4'          | 59.6  | 39.35 | 73.6 | 72.8 | 42.2 | 55.63 | 65.8 | 22.71 | 69.53 | 6.88   |
| 67605 | 'Akt1s1'        | 29.06 | 35.38 | 20.6 | 33.2 | 27.6 | 29.21 | 30.1 | 26.29 | 30.07 | 23.06  |
| 67606 | 'Fibin'         | 4.11  | 8.53  | 0.02 | 0    | 0    | 0     | 4.09 | 4.75  | 6.3   | 0      |
| 67607 | 'Zfp788'        | 7.33  | 6.72  | 6.36 | 6.32 | 5.01 | 3.71  | 0.04 | 13.35 | 7.03  | 10.99  |
| 67608 | 'Narf'          | 16.49 | 5.3   | 10.3 | 0.86 | 19.3 | 13.7  | 15.1 | 10.36 | 11.52 | 9.69   |
| 67609 | '4930453N24Rik' | 22.67 | 6.33  | 6.74 | 15.9 | 14.9 | 21.15 | 0.5  | 27.51 | 0.66  | 23.31  |
| 67610 | 'Rspry1'        | 9.9   | 16.36 | 13.6 | 15.6 | 18.7 | 1.99  | 4.58 | 13.88 | 25.95 | 11.94  |
| 67615 | 'Ube2r2'        | 15.15 | 18.07 | 9.4  | 15.2 | 8.54 | 14.96 | 16.6 | 13.1  | 13.57 | 14.06  |
| 67618 | 'Aasdhppt'      | 26.02 | 22.18 | 19.9 | 41   | 14.8 | 23.76 | 12.2 | 37.36 | 12.42 | 23.18  |
| 67619 | 'Nob1'          | 43.61 | 45.43 | 52.9 | 44.5 | 32.5 | 39.41 | 49.5 | 44.26 | 26    | 37.98  |
| 67620 | 'Lrp2bp'        | 0     | 0.67  | 0    | 0.09 | 1.5  | 0     | 0.03 | 0     | 0.06  | 0      |
| 67621 | 'Bend5'         | 13.55 | 3.56  | 13.1 | 2.34 | 5.29 | 5.25  | 12.7 | 11.07 | 4.65  | 6.53   |
| 67622 | 'Mxra7'         | 5.32  | 2.99  | 0.74 | 15.7 | 4.6  | 5.41  | 7.19 | 1.74  | 4.18  | 4.18   |
| 67623 | 'Tm7sf3'        | 12.66 | 11.02 | 13.5 | 0.02 | 5.31 | 3.92  | 22   | 11.24 | 18.38 | 12.5   |
| 67628 | 'Anp32b'        | 17.05 | 17.26 | 17.1 | 55.1 | 21.9 | 10.89 | 15.1 | 15.01 | 19.45 | 6.2    |
| 67629 | 'Spc24'         | 8.47  | 9.92  | 14.3 | 29.2 | 26.9 | 19.36 | 9.53 | 13.48 | 11.41 | 11.32  |
| 67630 | 'Samd8'         | 3.02  | 4.45  | 2.58 | 3.27 | 2.47 | 2.2   | 7.78 | 1.75  | 1.31  | 2.32   |
| 67636 | 'Etfrf1'        | 33.83 | 26.17 | 56.5 | 44.7 | 49.2 | 11.59 | 48.6 | 36.05 | 52.22 | 42.25  |
| 67647 | '4930523C07Rik' | 0.06  | 2.59  | 0    | 2.44 | 0    | 1.66  | 0    | 0     | 0     | 0      |
| 67655 | 'Ctdp1'         | 2.05  | 0.34  | 0.42 | 0    | 4.02 | 3.72  | 4.35 | 2.14  | 4.86  | 0.46   |
| 67656 | '4930548H24Rik' | 0     | 0     | 0    | 0    | 0    | 0     | 0    | 0.77  | 0     | 0      |
| 67657 | 'Rabl3'         | 11.3  | 11.33 | 2.62 | 0    | 5.12 | 18.45 | 5.95 | 20.87 | 3.95  | 11.44  |
| 67661 | 'lft172'        | 3.76  | 6.77  | 10.4 | 0.6  | 8.62 | 2.72  | 10.4 | 2.59  | 8.54  | 8.46   |
| 67664 | 'Rnf125'        | 0.39  | 0.32  | 0.35 | 0.3  | 2.15 | 0.18  | 0.15 | 0.38  | 0.73  | 0.35   |
| 67665 | 'Dctn4'         | 44.45 | 38.04 | 41.6 | 50.6 | 35.7 | 23.56 | 39.6 | 29.65 | 40.54 | 43.06  |
| 67666 | 'Hapln3'        | 0     | 0     | 0    | 0    | 0    | 0     | 5.71 | 0     | 0     | 0      |
| 67667 | 'Alkbh8'        | 10.16 | 10.77 | 15.3 | 4.54 | 6.98 | 7.59  | 5.04 | 20.64 | 16.33 | 4.7    |
| 67669 | 'Hikeshi'       | 76.51 | 82.83 | 72.3 | 90.5 | 102  | 114.2 | 77.7 | 84.67 | 81.03 | 95.55  |
| 67671 | 'Rpl38'         | 204.8 | 291.5 | 297  | 464  | 178  | 460.3 | 241  | 106.9 | 344.6 | 155.79 |
| 67673 | 'Elob'          | 637.7 | 697.4 | 733  | 889  | 650  | 1080  | 751  | 569.2 | 787.1 | 641.5  |
| 67674 | 'Trmt112'       | 141.7 | 121.3 | 137  | 94.6 | 108  | 211.6 | 117  | 109.8 | 124.1 | 132.95 |
| 67675 | 'Cuta'          | 99.92 | 85.65 | 112  | 71.7 | 96.1 | 132.8 | 74.3 | 135.7 | 116.7 | 141.05 |
| 67676 | 'Rpp21'         | 117.4 | 83.92 | 89.7 | 94.5 | 116  | 273   | 87.7 | 118.1 | 85.02 | 105.66 |
| 67678 | 'Lsm3'          | 42.71 | 41.69 | 82.7 | 82.3 | 61.6 | 86.71 | 67.7 | 58.58 | 53.3  | 79.16  |
| 67680 | 'Sdhd'          | 466.5 | 459.5 | 485  | 500  | 472  | 521.9 | 403  | 549.8 | 451.9 | 511.38 |
| 67681 | 'Mrpl18'        | 71.82 | 64.62 | 86.8 | 108  | 117  | 77.14 | 108  | 82.28 | 81.85 | 61.65  |
| 67683 | 'Pbdc1'         | 28.83 | 14.81 | 21.2 | 44.3 | 37.6 | 36.05 | 45.5 | 36.19 | 26.74 | 43.2   |
| 67684 | 'Luc7l3'        | 36.88 | 46.8  | 23   | 25.3 | 58.1 | 38.76 | 61   | 43.95 | 49.19 | 40.69  |
| 67685 | 'Dyx1c1'        | 5.12  | 3.12  | 3.78 | 0    | 11.1 | 0.02  | 1.17 | 4.76  | 0.87  | 2.18   |
| 67687 | '1700011L22Rik' | 0     | 0     | 0    | 0    | 2.67 | 0     | 0    | 0.07  | 0     | 0      |
| 67689 | 'Aldh3b1'       | 0     | 0     | 0    | 0    | 1.86 | 0     | 0    | 1.61  | 0     | 0      |
| 67690 | 'Prss37'        | 0.35  | 0     | 0    | 0    | 0    | 0     | 0    | 0     | 0     | 0      |
| 67693 | 'Hypk'          | 206.1 | 167.5 | 186  | 299  | 238  | 342.9 | 148  | 230.3 | 323.9 | 264.54 |
| 67694 | 'lft74'         | 25.49 | 15.48 | 14.1 | 21.9 | 12.7 | 27.54 | 9.2  | 17.58 | 19.65 | 23.41  |
| 67695 | 'Ost4'          | 197.2 | 148.7 | 186  | 186  | 173  | 259.8 | 188  | 137.7 | 187.4 | 154.82 |
| 67698 | 'Fam174a'       | 22.97 | 36.32 | 39.1 | 55.4 | 19.6 | 19.47 | 34   | 17.4  | 12.31 | 9.58   |
| 67702 | 'Rnf149'        | 14.26 | 6.11  | 4.47 | 10.2 | 6.74 | 2.58  | 5.47 | 8.72  | 1.11  | 3.88   |
| 67703 | 'Kirrel3'       | 9.29  | 2.38  | 6.28 | 4.49 | 13.1 | 15.18 | 24.8 | 12.16 | 12.84 | 25.59  |
| 67704 | '1810037l17Rik' | 70.08 | 71.63 | 89.4 | 90.3 | 102  | 125.7 | 103  | 58.28 | 101.1 | 128.65 |
| 67706 | 'Tmem179b'      | 4.05  | 24.03 | 15.8 | 13.4 | 21.1 | 28.63 | 16.1 | 14.37 | 18.37 | 5.25   |
| 67707 | 'Mrpl24'        | 54.42 | 62.1  | 17.5 | 67.8 | 43.6 | 49.94 | 75   | 33.74 | 30.71 | 46.41  |
| 67708 | 'Pcnx4'         | 23.67 | 31.69 | 22.9 | 17.9 | 18.6 | 7.57  | 25.2 | 21.77 | 18.25 | 19.8   |

|        |            |       |       |      |      |      |       |      |       |       |        |
|--------|------------|-------|-------|------|------|------|-------|------|-------|-------|--------|
| 67710  | 'Polr2g'   | 171.6 | 195   | 196  | 279  | 212  | 228.3 | 145  | 184.4 | 155.9 | 195.77 |
| 67711  | 'Nsmce1'   | 57.61 | 73.56 | 43.6 | 76.2 | 64   | 46.35 | 49.5 | 59.08 | 39.68 | 59.27  |
| 67712  | 'Slc25a37' | 0.71  | 0.1   | 0.79 | 1.87 | 1.09 | 0     | 0.42 | 1.22  | 0.01  | 0.22   |
| 67713  | 'Dnajc19'  | 115.8 | 67.76 | 69.9 | 113  | 103  | 123.3 | 62.7 | 96.95 | 125.2 | 78.53  |
| 67722  | 'Actl11'   | 0     | 0     | 0    | 0    | 0    | 0     | 0    | 0     | 0.01  | 0      |
| 67724  | 'Pop1'     | 6.96  | 3.03  | 0    | 0.02 | 3.16 | 1.32  | 4.9  | 2.18  | 2.17  | 1.57   |
| 67725  | 'Nudt13'   | 7.17  | 5.81  | 9.75 | 17.3 | 8.01 | 0.02  | 0.02 | 4.18  | 5.69  | 3.75   |
| 67726  | 'Fam114a2' | 15.97 | 22.49 | 31.1 | 27.3 | 35.1 | 40.17 | 20.1 | 31.4  | 16.92 | 23.12  |
| 67727  | 'Stx17'    | 1.48  | 1.63  | 2.85 | 2.33 | 0.46 | 1.14  | 3.13 | 0.21  | 1.59  | 1.09   |
| 67728  | 'Dph2'     | 20.09 | 6.02  | 8.65 | 16.6 | 13.4 | 10.83 | 5.48 | 10.73 | 15.98 | 14.05  |
| 67729  | 'Mansc1'   | 0     | 0.08  | 0.18 | 0    | 0.06 | 0     | 0    | 0     | 2.37  | 1.45   |
| 677296 | 'Fcr16'    | 0     | 0     | 0    | 0    | 0    | 0     | 0    | 1.59  | 0.98  | 0      |
| 67731  | 'Fbxo32'   | 1.01  | 2.72  | 0.06 | 0.13 | 4.85 | 0.07  | 0.05 | 0.5   | 0.48  | 0.61   |
| 67732  | 'lah1'     | 11.86 | 18.15 | 32.8 | 41.8 | 23.4 | 42.6  | 33.6 | 39.1  | 13.97 | 17.56  |
| 67733  | 'Itgb3bp'  | 4.37  | 5.4   | 1.18 | 3.18 | 1.8  | 3.86  | 1.73 | 2.03  | 1.74  | 9.58   |
| 67736  | 'Ccdc130'  | 20.84 | 14.86 | 19.6 | 14.4 | 16.1 | 18.84 | 3.56 | 9.51  | 20.48 | 6.51   |
| 67738  | 'Ppid'     | 134.6 | 121.9 | 97.1 | 62.6 | 90.8 | 134.5 | 127  | 105.4 | 131.1 | 112.43 |
| 67739  | 'Slc48a1'  | 65.64 | 46.94 | 44.5 | 67.7 | 98.5 | 98.48 | 50.5 | 50.32 | 69.17 | 55.65  |
| 67742  | 'Samsn1'   | 0     | 0.18  | 0    | 0    | 0    | 2.34  | 0    | 0     | 0     | 0      |
| 67747  | 'Ribc2'    | 0     | 0     | 0.97 | 0    | 3.68 | 2.19  | 0    | 0     | 0     | 5.58   |
| 67749  | 'Mgarp'    | 0     | 0     | 0    | 0.05 | 6.58 | 0     | 0    | 0     | 0     | 0      |
| 67752  | 'Ppp1r32'  | 15.03 | 26.03 | 4.65 | 0    | 7.37 | 23.44 | 0.03 | 9.63  | 14.52 | 24.87  |
| 67753  | 'Eqtn'     | 0.4   | 0     | 0    | 0    | 0    | 0     | 0    | 0     | 0     | 0      |
| 67755  | 'Ddx47'    | 49.07 | 47.21 | 53.7 | 72.4 | 60.3 | 53.2  | 51.3 | 59.45 | 27.43 | 50.41  |
| 67759  | 'Plgrkt'   | 10.79 | 43.49 | 25.6 | 4.35 | 23.2 | 10.53 | 7.16 | 13.19 | 1.92  | 25.27  |
| 67760  | 'Slc38a2'  | 11.63 | 16.79 | 13.8 | 8.5  | 6.3  | 6.33  | 11.3 | 14.56 | 14.88 | 12.56  |
| 67763  | 'Prpsap1'  | 74.5  | 72    | 39.1 | 61.4 | 42.5 | 88.15 | 80.8 | 61.26 | 90.33 | 97.81  |
| 67767  | 'Jagn1'    | 109.3 | 86.68 | 82.4 | 51.7 | 78.6 | 116.5 | 66.6 | 147.4 | 76.62 | 93.14  |
| 67768  | 'N6amt1'   | 26.84 | 32.12 | 37.9 | 22.5 | 30.4 | 28.89 | 13.5 | 38.41 | 31.06 | 33.51  |
| 67769  | 'Gpatch2'  | 4.1   | 13.59 | 5.92 | 2.43 | 7.88 | 6.7   | 3.63 | 5.88  | 9.29  | 3.7    |
| 67770  | 'Caap1'    | 4.06  | 2.9   | 1.86 | 6.79 | 0.23 | 0.83  | 1.28 | 5.29  | 5.16  | 3.2    |
| 67771  | 'Arpc5'    | 152.3 | 152.3 | 48.5 | 176  | 136  | 146.1 | 82.9 | 111.4 | 141.3 | 144.01 |
| 67772  | 'Chd8'     | 3.86  | 2.59  | 4.76 | 2.32 | 6.29 | 6.32  | 5.34 | 5.79  | 6.06  | 5.72   |
| 67773  | 'Kat8'     | 39.36 | 17.1  | 22.3 | 16.7 | 15.8 | 12.39 | 17.4 | 13.12 | 23.44 | 38.9   |
| 67774  | 'Borcs5'   | 30.75 | 30.49 | 32.5 | 13.7 | 27   | 45.44 | 41.9 | 38.83 | 40.06 | 35.17  |
| 67775  | 'Rtp4'     | 10.18 | 0.62  | 14.7 | 14.8 | 0.19 | 7.16  | 5.24 | 1.75  | 3.16  | 2.11   |
| 67776  | 'Vwa5a'    | 1.35  | 0     | 6.51 | 0    | 0.01 | 5.27  | 0    | 1.95  | 2.98  | 13.35  |
| 67778  | 'Zfp639'   | 17.51 | 16.2  | 14.7 | 23.6 | 12.6 | 14.51 | 19.4 | 9.51  | 1.01  | 0.56   |
| 67781  | 'Ilf2'     | 89.85 | 71.22 | 79.8 | 65.9 | 49.2 | 75.35 | 119  | 92.53 | 62.08 | 71.57  |
| 67784  | 'Plxnd1'   | 0     | 0     | 1.11 | 0.17 | 0    | 0     | 0.89 | 0     | 0     | 0      |
| 67785  | 'Zmym4'    | 2.94  | 1.94  | 4.42 | 2.15 | 1.46 | 1.78  | 0.16 | 2.03  | 1.66  | 2.4    |
| 67788  | 'Sfr1'     | 146.1 | 160.9 | 140  | 171  | 160  | 162.1 | 149  | 136   | 145.7 | 125.34 |
| 677884 | 'Pakap'    | 3.43  | 1.18  | 4.51 | 2.99 | 3.31 | 3.23  | 0    | 7.03  | 1.86  | 4.21   |
| 67789  | 'Dalrd3'   | 75.6  | 80.73 | 54.4 | 10.1 | 66.2 | 77.42 | 95.9 | 57.36 | 66.38 | 64.64  |
| 67790  | 'Rab39b'   | 11.36 | 10.3  | 21.5 | 3.87 | 0.47 | 5.94  | 12.1 | 9.71  | 14.08 | 11.2   |
| 67792  | 'Rgs8'     | 1.11  | 0.53  | 5.45 | 0    | 2.84 | 1.67  | 13.2 | 3.82  | 0.01  | 0.05   |
| 67795  | 'Rnls'     | 2.83  | 1.98  | 1.35 | 3.82 | 3.88 | 3     | 2.97 | 1.48  | 6.54  | 4.14   |
| 67797  | 'Snrrp48'  | 16.44 | 21.23 | 13.3 | 18.6 | 6.04 | 20.47 | 7.07 | 9.87  | 26.29 | 15.32  |
| 67800  | 'Dgat2'    | 28.48 | 26.56 | 25.8 | 45.7 | 41.3 | 41.77 | 22   | 35.65 | 26.96 | 39.12  |
| 67801  | 'Pllp'     | 7.61  | 18.86 | 77.4 | 33   | 14.6 | 52.45 | 51.4 | 16.46 | 0.02  | 0.05   |
| 67803  | 'Limd2'    | 37.4  | 36.64 | 32   | 27.7 | 37.7 | 48.08 | 19   | 24.16 | 54.77 | 26.35  |
| 67804  | 'Snx2'     | 69.74 | 84.31 | 59.7 | 67.8 | 49.6 | 61.79 | 51.7 | 74.8  | 67.97 | 75.41  |
| 67808  | 'Tprgl'    | 28.77 | 26.84 | 37   | 75   | 40.4 | 56.39 | 35.2 | 22.54 | 24.5  | 18.99  |
| 67809  | 'Rmdn3'    | 18.84 | 51.02 | 57.2 | 73.1 | 43.3 | 48.49 | 52.3 | 52.26 | 65.82 | 60.24  |
| 67811  | 'Poldip2'  | 66.94 | 53.36 | 116  | 79.3 | 37.7 | 79.83 | 77.8 | 63.2  | 46.74 | 48.92  |
| 67812  | 'Ubxn4'    | 30.68 | 36.41 | 22.3 | 33.4 | 29.5 | 24.18 | 20.2 | 18.46 | 38.17 | 21.62  |
| 67815  | 'Sec14l2'  | 0     | 0.04  | 1.83 | 0    | 0.12 | 0     | 4.49 | 0     | 0     | 0.03   |
| 67819  | 'Derl1'    | 63.72 | 78.57 | 41.3 | 49.7 | 62.7 | 49.25 | 48.6 | 53.72 | 53.49 | 99.45  |



|       |                 |       |       |      |      |      |       |      |       |       |        |
|-------|-----------------|-------|-------|------|------|------|-------|------|-------|-------|--------|
| 67824 | 'Nmral1'        | 10.99 | 21.5  | 6.49 | 1.57 | 9.69 | 0     | 9.07 | 28.49 | 19.87 | 8.53   |
| 67826 | 'Snap47'        | 738.5 | 751.8 | 738  | 624  | 560  | 678.6 | 715  | 801.4 | 573.7 | 558.46 |
| 67830 | 'Rer1'          | 76.84 | 81.67 | 65.5 | 86.5 | 77.3 | 143.8 | 151  | 107.3 | 77.44 | 91.37  |
| 67832 | 'Brix1'         | 8.19  | 15.92 | 15.4 | 26   | 16.7 | 24.9  | 11   | 19.78 | 13.95 | 15.86  |
| 67834 | 'ldh3a'         | 157.3 | 172.2 | 206  | 106  | 169  | 159   | 193  | 209.5 | 169.9 | 160.77 |
| 67836 | 'Wdr83'         | 59.07 | 16.61 | 26.6 | 44.9 | 40.1 | 45.31 | 70.1 | 54.35 | 41.2  | 64.24  |
| 67838 | 'Dnajb11'       | 20.1  | 42.5  | 21.2 | 6.64 | 11.2 | 12.62 | 19.5 | 12.62 | 44.69 | 16.29  |
| 67839 | 'Gpsm1'         | 18.02 | 21.06 | 28.6 | 18.3 | 15.2 | 15.07 | 10.3 | 16.88 | 11.77 | 6.4    |
| 67840 | 'Mrpl57'        | 25.91 | 35.03 | 15.1 | 36.9 | 15.6 | 39.82 | 29.2 | 29.6  | 30.62 | 35.98  |
| 67841 | 'Atg3'          | 35.35 | 26.79 | 34.9 | 57.7 | 14.9 | 15.92 | 21.4 | 22.74 | 37.43 | 8.6    |
| 67842 | 'Nop9'          | 3.77  | 2.63  | 1.02 | 0    | 2.27 | 0.03  | 0.61 | 1.76  | 0     | 1.18   |
| 67843 | 'Slc35a4'       | 25.66 | 17.05 | 37.9 | 21.9 | 32.8 | 37.08 | 28.2 | 29.68 | 7.85  | 23.7   |
| 67844 | 'Rab32'         | 9.66  | 0     | 0    | 0    | 0    | 0     | 0    | 0     | 3.76  | 0      |
| 67845 | 'Rnf115'        | 15.03 | 9.97  | 9.32 | 49.8 | 12.6 | 10.73 | 3.28 | 19.61 | 18.79 | 7.32   |
| 67846 | 'Tmem39a'       | 14.94 | 2.32  | 4.19 | 6.16 | 3.86 | 1.3   | 10.4 | 5.3   | 5.11  | 9.41   |
| 67847 | 'Sncaip'        | 4.04  | 1.65  | 0.31 | 6.27 | 0.61 | 0.89  | 0.03 | 1.95  | 1.94  | 0.25   |
| 67848 | 'Ddx55'         | 17.61 | 3.17  | 8.75 | 13.6 | 8.63 | 21.62 | 6.82 | 14.52 | 10.02 | 6.54   |
| 67849 | 'Cdca5'         | 0     | 0     | 1.62 | 0    | 0    | 0     | 0    | 0     | 0     | 0      |
| 67851 | '1700021F05Rik' | 17.2  | 22.46 | 14.9 | 27.5 | 20.5 | 27.97 | 22.4 | 44.48 | 22.02 | 23.6   |
| 67855 | 'Asprv1'        | 0.06  | 0     | 2.03 | 0    | 0    | 0     | 7.84 | 0     | 0     | 1.99   |
| 67856 | 'Echdc3'        | 0     | 0     | 0.05 | 7.05 | 0    | 0     | 4.05 | 1.51  | 0     | 0      |
| 67857 | 'Ppp6c'         | 23.61 | 23.95 | 25.3 | 33.8 | 13.7 | 19.96 | 28.3 | 14.57 | 16.62 | 35.04  |
| 67859 | 'Cysrt1'        | 0     | 0     | 0    | 0    | 0    | 8.91  | 0    | 0     | 0     | 0      |
| 67860 | 'S100a16'       | 34.11 | 36.69 | 160  | 83.6 | 43.7 | 55.84 | 81.4 | 35.62 | 18.31 | 34.67  |
| 67861 | 'Akr1b10'       | 21.85 | 10.28 | 33.2 | 0    | 16.2 | 24.5  | 41.4 | 25.07 | 18.1  | 30.29  |
| 67862 | '2310033P09Rik' | 43.51 | 19.04 | 28.4 | 33.6 | 57.8 | 78.92 | 25   | 37.04 | 22    | 55.22  |
| 67863 | 'Slc25a11'      | 234.9 | 182.7 | 321  | 163  | 192  | 303.4 | 252  | 240.1 | 171   | 263.33 |
| 67864 | 'Yipf4'         | 33.23 | 30.46 | 29.1 | 52.9 | 25.7 | 9.39  | 28.6 | 19.23 | 24.37 | 8.11   |
| 67865 | 'Rgs10'         | 132.7 | 144.5 | 315  | 124  | 30.9 | 172.7 | 157  | 331.1 | 272   | 75.65  |
| 67866 | 'Wfdc1'         | 0     | 0.08  | 4.81 | 0    | 89.1 | 6.6   | 0.04 | 1.44  | 4.23  | 3.11   |
| 67867 | 'Lrrc28'        | 5.54  | 7.25  | 5.91 | 0.02 | 8.48 | 2.26  | 8.39 | 5.92  | 8.64  | 13.78  |
| 67869 | 'Paip2'         | 262.7 | 248.6 | 246  | 227  | 208  | 269.8 | 239  | 272.6 | 270.5 | 295.57 |
| 67870 | 'Enoph1'        | 49.03 | 52.81 | 52.1 | 26.1 | 97   | 60.58 | 55.9 | 40.45 | 34.41 | 38.57  |
| 67871 | 'Mrff'          | 16.07 | 19.22 | 16   | 21   | 12.6 | 26.71 | 24.3 | 21.23 | 24.42 | 9.99   |
| 67872 | 'Nsmce4a'       | 2.87  | 8.28  | 8.84 | 27.1 | 11.3 | 18.92 | 4.6  | 8     | 6.73  | 8.51   |
| 67873 | 'Mri1'          | 9.69  | 7.38  | 13.7 | 19.8 | 3.21 | 11.6  | 12.9 | 12.62 | 6.59  | 8.09   |
| 67874 | 'Rprm'          | 169.6 | 56.15 | 50.2 | 48.3 | 86.8 | 17.89 | 102  | 42.63 | 4.39  | 9.22   |
| 67876 | 'Coq10b'        | 18.77 | 26.65 | 18   | 78.2 | 19.6 | 26.6  | 20.9 | 29.12 | 22.91 | 30.04  |
| 67877 | 'Naa20'         | 130.9 | 106.8 | 102  | 141  | 170  | 133.7 | 110  | 155.3 | 190.6 | 103.22 |
| 67878 | 'Tmem33'        | 13.43 | 11.66 | 9.98 | 13   | 8.33 | 4.68  | 4.7  | 9.22  | 11.02 | 7.78   |
| 67880 | 'Dcxr'          | 9.84  | 17.77 | 3.71 | 15.4 | 15.2 | 6.24  | 12.9 | 18.19 | 14.46 | 21.39  |
| 67881 | 'Mdp1'          | 29.76 | 41.47 | 32.3 | 46.6 | 64.9 | 34.64 | 29.5 | 18.84 | 54    | 41.44  |
| 67883 | 'Uxs1'          | 19.43 | 32.83 | 11.3 | 25.9 | 15.3 | 26.04 | 24.3 | 10.98 | 35.35 | 40.46  |
| 67884 | '1810043G02Rik' | 69.31 | 118.3 | 104  | 95.8 | 75.2 | 150.7 | 113  | 139.1 | 76.25 | 87.83  |
| 67886 | 'Camsap2'       | 3.94  | 2.75  | 6.87 | 7.09 | 3.2  | 2.57  | 1.17 | 5.42  | 4.03  | 4.06   |
| 67887 | 'Saraf'         | 672.2 | 835   | 501  | 883  | 528  | 736.9 | 471  | 535.4 | 608.9 | 783.85 |
| 67888 | 'Tmem100'       | 4.92  | 7.74  | 31.2 | 27.9 | 2.27 | 5.82  | 13   | 10.78 | 0     | 10.22  |
| 67889 | 'Rbm18'         | 35.05 | 49    | 41.2 | 60.9 | 44.7 | 42.27 | 30   | 67.95 | 60.48 | 35.68  |
| 67890 | 'Ufm1'          | 4.81  | 5.42  | 5.06 | 3.42 | 6.33 | 3.48  | 3.57 | 4.6   | 5.77  | 8.64   |
| 67891 | 'Rpl4'          | 255.2 | 379.9 | 287  | 478  | 308  | 240.1 | 300  | 220.9 | 209.7 | 276.23 |
| 67892 | 'Coa6'          | 67.66 | 45.82 | 35.1 | 52.8 | 50.5 | 47.48 | 38   | 65.15 | 47.07 | 39.86  |
| 67893 | 'Tmem86a'       | 7.25  | 9.17  | 17.3 | 8.9  | 7.55 | 43.7  | 25.9 | 19.51 | 21.66 | 15.1   |
| 67894 | 'Fam45a'        | 27.54 | 28.73 | 33.7 | 20.4 | 50.4 | 39.68 | 30.7 | 49.5  | 22.42 | 36.4   |
| 67895 | 'Ppa1'          | 115.3 | 158.8 | 133  | 155  | 138  | 170.6 | 159  | 123.8 | 126.9 | 132.27 |
| 67896 | 'Ccadc80'       | 0     | 1.22  | 1.41 | 0    | 0.01 | 0     | 0    | 0     | 0.49  | 0      |
| 67897 | 'Rnmt'          | 48.53 | 34.48 | 34.5 | 86.7 | 43.1 | 46.89 | 35.4 | 44.87 | 57.42 | 72.95  |
| 67898 | 'Pef1'          | 68.53 | 111.5 | 144  | 54.2 | 146  | 106.9 | 70.8 | 131.3 | 100.3 | 120.38 |
| 67899 | 'Cmc1'          | 12.69 | 22.66 | 21.3 | 54.5 | 12.3 | 22.19 | 9.37 | 16.59 | 2.85  | 10.9   |

|       |                 |       |       |      |      |      |       |      |       |       |         |
|-------|-----------------|-------|-------|------|------|------|-------|------|-------|-------|---------|
| 67900 | 'Mtfp1'         | 87.66 | 98    | 85.6 | 44   | 94.2 | 148.6 | 77.4 | 127.9 | 119.7 | 80.07   |
| 67902 | 'Sumf2'         | 31.13 | 29.68 | 13.2 | 22.4 | 10.5 | 21.83 | 7.28 | 3.77  | 19.3  | 12.51   |
| 67903 | 'Gipc1'         | 32.04 | 53.93 | 30.1 | 35.1 | 39.9 | 66.25 | 43.8 | 42.24 | 31.38 | 51.45   |
| 67905 | 'Ppm1m'         | 12.85 | 31.14 | 16.2 | 15.2 | 17.5 | 16.42 | 17.2 | 7.73  | 22.04 | 14.69   |
| 67911 | 'Zfp169'        | 2.14  | 0.85  | 0.89 | 0.55 | 2.17 | 0     | 1.91 | 3.57  | 2.49  | 1.38    |
| 67912 | '1600012H06Rik' | 2.11  | 5.23  | 4.06 | 0.04 | 3.53 | 4.22  | 4.51 | 4.36  | 5.77  | 4.29    |
| 67914 | 'Coq9'          | 70.82 | 64.22 | 59.5 | 12.8 | 40.4 | 84.29 | 95.8 | 69.19 | 47.59 | 77.76   |
| 67916 | 'Plpp3'         | 38.55 | 56.68 | 23.7 | 15   | 15.9 | 40.02 | 10.1 | 8.38  | 28.67 | 7.95    |
| 67917 | 'Zcchc3'        | 1.51  | 4.05  | 4.25 | 1.84 | 3.68 | 0.61  | 7.2  | 2.99  | 5.64  | 1.09    |
| 67920 | 'Mak16'         | 22.62 | 33.69 | 20.4 | 15.6 | 23.8 | 20.72 | 5.22 | 24.94 | 5.03  | 25.12   |
| 67921 | 'Ube2f'         | 40.44 | 40.48 | 36.8 | 18.5 | 36.2 | 23.05 | 40.1 | 25.72 | 50.87 | 27.75   |
| 67922 | 'Fam32a'        | 69.84 | 82.57 | 102  | 93.2 | 57.7 | 127.9 | 121  | 85.55 | 72.58 | 58.34   |
| 67923 | 'Eloc'          | 135.7 | 127.3 | 83.2 | 143  | 75.6 | 90.86 | 92   | 84.47 | 99.17 | 86.35   |
| 67933 | 'Hcfc2'         | 2.72  | 4.73  | 16.7 | 3.68 | 9.83 | 3.14  | 2.66 | 7.21  | 7.13  | 8.31    |
| 67935 | 'Ces5a'         | 2.42  | 0     | 0    | 0    | 1.09 | 0     | 7.01 | 0     | 6.44  | 2.49    |
| 67936 | 'Wdr55'         | 12.87 | 8.05  | 9.79 | 23   | 10.2 | 13.78 | 4.81 | 19.31 | 17.65 | 16.29   |
| 67937 | 'Tmem59l'       | 911.2 | 1070  | 928  | 1048 | 736  | 1069  | 740  | 1145  | 1341  | 1289.12 |
| 67938 | 'Myl12b'        | 789.1 | 622.9 | 653  | 536  | 732  | 1102  | 762  | 960.2 | 810.2 | 934     |
| 67939 | 'Prorsd1'       | 4.78  | 5.02  | 5.81 | 3.91 | 5.26 | 11.79 | 11.1 | 3.67  | 12.78 | 5.81    |
| 67941 | 'Rps27l'        | 84.52 | 98.52 | 71.3 | 194  | 71.4 | 134.8 | 106  | 43.27 | 95.02 | 109.36  |
| 67942 | 'Atp5g2'        | 215.9 | 228.5 | 233  | 210  | 227  | 331.7 | 222  | 188   | 193.9 | 232.31  |
| 67943 | 'Mesd'          | 67.69 | 137.3 | 60.3 | 87.6 | 60.8 | 97.57 | 57.2 | 72.7  | 144.7 | 103.72  |
| 67945 | 'Rpl41'         | 773.5 | 787.7 | 904  | 1310 | 542  | 1031  | 756  | 356.8 | 780.6 | 632.86  |
| 67946 | 'Spata6'        | 2.5   | 3.83  | 3    | 1.54 | 0.89 | 0.6   | 0    | 3.49  | 0.47  | 0       |
| 67948 | 'Fbxo28'        | 2.21  | 0.52  | 1.73 | 3.06 | 0.57 | 0.96  | 2.48 | 0.44  | 2.65  | 0.7     |
| 67949 | 'Nifk'          | 37    | 26.55 | 13   | 28.4 | 30.2 | 37.62 | 30.6 | 31.16 | 30.59 | 36.47   |
| 67951 | 'Tubb6'         | 0.03  | 7.73  | 3.64 | 0.03 | 0    | 0     | 0    | 0.02  | 0.22  | 3.37    |
| 67952 | 'Tomm20'        | 72.11 | 86.08 | 109  | 107  | 85.6 | 77.91 | 102  | 99.99 | 99.13 | 108.19  |
| 67955 | 'Sugt1'         | 41.06 | 37.12 | 12.1 | 39.4 | 42.2 | 37.32 | 40.2 | 36.21 | 41.78 | 38.17   |
| 67956 | 'Kmt5a'         | 4.81  | 1.78  | 0.8  | 7.56 | 2.85 | 1.95  | 3.88 | 2.02  | 2.3   | 4.11    |
| 67958 | 'U2surp'        | 12.92 | 16.77 | 17.8 | 21.3 | 15.4 | 15.01 | 17.5 | 12.79 | 14.22 | 14.88   |
| 67959 | 'Puf60'         | 181.9 | 150.5 | 162  | 191  | 213  | 294.6 | 195  | 226.4 | 222.1 | 234.53  |
| 67963 | 'Npc2'          | 23.36 | 40.45 | 22.3 | 39.1 | 16.7 | 38.84 | 16.1 | 26.04 | 40.57 | 32.94   |
| 67966 | 'Zcchc10'       | 23.15 | 12.73 | 9.23 | 11.1 | 18.8 | 0.11  | 0.16 | 13.57 | 17.55 | 18.95   |
| 67967 | 'Pold3'         | 19.42 | 7     | 21.1 | 20.2 | 13.7 | 15.64 | 11.8 | 22.36 | 29.01 | 22.87   |
| 67968 | 'Ooep'          | 4.5   | 5.34  | 0.69 | 12.2 | 4.72 | 3.07  | 0.13 | 4.94  | 2.45  | 9.49    |
| 67971 | 'Tppp3'         | 489.6 | 391.1 | 397  | 610  | 492  | 402   | 259  | 314.9 | 296   | 367.08  |
| 67972 | 'Atp2b1'        | 26.09 | 58.01 | 26.1 | 24.4 | 45.8 | 37.67 | 23.1 | 41.86 | 42.74 | 25.94   |
| 67973 | 'Mphosph10'     | 5.81  | 8.5   | 15.5 | 8.24 | 11.8 | 15.48 | 9.35 | 9.16  | 14.35 | 11.3    |
| 67974 | 'Ccny'          | 9.39  | 4.42  | 10.9 | 8.02 | 9.06 | 4.06  | 3.91 | 2.36  | 7.26  | 0       |
| 67976 | 'Trabd'         | 17.95 | 5.82  | 16.3 | 10.7 | 17.9 | 5.72  | 17.9 | 16.21 | 6.1   | 8.39    |
| 67978 | 'Tctn2'         | 27.65 | 36.3  | 29   | 21.8 | 11   | 6.63  | 22.7 | 2.49  | 17.06 | 34.96   |
| 67979 | 'Atad1'         | 83.25 | 59.33 | 69.1 | 29.7 | 26.9 | 42.42 | 52.2 | 70.19 | 67.8  | 71.85   |
| 67980 | 'Gnpda2'        | 56.1  | 32.02 | 38.7 | 35   | 35.6 | 62.98 | 20.6 | 27.98 | 43.39 | 48.53   |
| 67983 | 'Pdzd9'         | 0.87  | 0.36  | 0.27 | 0.62 | 1.47 | 0     | 1.46 | 0.26  | 0.37  | 0.31    |
| 67988 | 'Tmx3'          | 20.57 | 13.15 | 16.1 | 15.5 | 6.9  | 3.75  | 4.81 | 10.41 | 20.88 | 22.37   |
| 67991 | 'Nacc2'         | 3.69  | 3.89  | 8.61 | 0.06 | 19.6 | 9.31  | 6.65 | 5.31  | 0.85  | 4.88    |
| 67993 | 'Nudt12'        | 10.22 | 0     | 1.33 | 0    | 10.8 | 2.06  | 6.21 | 0     | 3.6   | 0.47    |
| 67994 | 'Mrps11'        | 76.69 | 56.13 | 67.6 | 60.2 | 56.4 | 97.13 | 61.1 | 67.95 | 61.05 | 71.01   |
| 67996 | 'Srsf6'         | 45.67 | 48.63 | 34.1 | 39.4 | 29.1 | 35.81 | 38   | 38.98 | 48.47 | 21.75   |
| 67997 | 'Ddx59'         | 4.34  | 2.69  | 12.6 | 15.8 | 10.6 | 10.08 | 11.7 | 1.56  | 9.39  | 15.19   |
| 67998 | 'Retreg3'       | 7.15  | 14.52 | 3.65 | 5.14 | 12.7 | 6.63  | 7.76 | 12.19 | 24.75 | 6.77    |
| 68001 | 'Cfap298'       | 51.92 | 78.64 | 63.4 | 91.7 | 58.8 | 57.46 | 51.5 | 57.21 | 39.52 | 47.31   |
| 68002 | 'Sdhaf4'        | 128.3 | 133.5 | 110  | 84.6 | 124  | 190.1 | 46   | 113.5 | 167.2 | 177.97  |
| 68009 | 'Defa20'        | 0     | 0     | 0    | 0    | 0    | 0     | 0.03 | 0     | 0     | 0       |
| 68010 | 'Bambi'         | 0.53  | 0.84  | 1.16 | 6.58 | 1.59 | 0.35  | 1.69 | 0.69  | 2.24  | 1.04    |
| 68011 | 'Snrpg'         | 114.3 | 170.8 | 128  | 226  | 70.1 | 263.7 | 126  | 65.74 | 161.8 | 79.25   |
| 68014 | 'Zwilch'        | 0.06  | 0     | 2.57 | 0    | 0    | 0     | 3.03 | 0     | 3.19  | 0.02    |

|       |                 |       |       |      |      |      |       |      |       |       |        |
|-------|-----------------|-------|-------|------|------|------|-------|------|-------|-------|--------|
| 68015 | 'Trap1'         | 57.34 | 49.35 | 56.3 | 64.9 | 32.2 | 55.35 | 53.2 | 49.07 | 39.7  | 25.21  |
| 68016 | 'Cavin4'        | 0     | 0     | 0    | 0    | 0    | 0.04  | 0    | 0     | 0.02  | 0.38   |
| 68017 | 'Mrm2'          | 11.91 | 24.08 | 18.5 | 25.3 | 14   | 32.97 | 2.01 | 23.95 | 6.98  | 19.62  |
| 68018 | 'Col4a3bp'      | 5.88  | 3.5   | 5.41 | 0.19 | 4.26 | 4.93  | 4.19 | 3.41  | 7.25  | 5.58   |
| 68020 | 'Apopt1'        | 51.72 | 48.83 | 26.4 | 58.8 | 68.2 | 53.56 | 45.5 | 44.04 | 48.92 | 54.32  |
| 68021 | 'Bphl'          | 39.44 | 23.47 | 32.5 | 24.5 | 30.2 | 63.57 | 62.5 | 53.57 | 57.15 | 56.29  |
| 68023 | 'Pdf'           | 34.34 | 30.48 | 79.4 | 41.1 | 29.4 | 35.06 | 60.6 | 41.95 | 40.51 | 21.37  |
| 68024 | 'Hist1h2bc'     | 46.88 | 50.27 | 22.5 | 43.2 | 22.9 | 20.95 | 47   | 22.44 | 12.59 | 41.06  |
| 68026 | 'Pclaf'         | 0.59  | 0.02  | 0.12 | 0    | 0    | 0.19  | 0    | 0     | 0.2   | 0.05   |
| 68027 | 'Tmem178'       | 1.57  | 7.45  | 10   | 10.7 | 18.2 | 14.85 | 10.4 | 7.93  | 4.46  | 3.04   |
| 68028 | 'Rpl22l1'       | 308.1 | 396.3 | 352  | 417  | 200  | 395.8 | 338  | 237.8 | 276   | 248.3  |
| 68031 | 'Rnf146'        | 26.19 | 25.96 | 10.2 | 8.27 | 21.9 | 25.9  | 22.7 | 30.14 | 26.1  | 25.42  |
| 68032 | 'Emc4'          | 318.3 | 284.3 | 267  | 314  | 322  | 407.9 | 206  | 386.8 | 349.8 | 303.57 |
| 68033 | 'Cox19'         | 70.2  | 47.08 | 50.3 | 39.7 | 39.5 | 73.64 | 28.3 | 57.44 | 74.99 | 48.56  |
| 68034 | 'Fam122a'       | 6.05  | 0.91  | 1.17 | 3.18 | 4.62 | 2.52  | 2.41 | 5.67  | 8.41  | 3.37   |
| 68035 | 'Rbm42'         | 59.92 | 52.12 | 63.8 | 69.3 | 29.1 | 36.64 | 44.7 | 24.63 | 53.28 | 26.44  |
| 68036 | 'Zfp706'        | 84.38 | 95.03 | 75.7 | 76.8 | 104  | 81.28 | 114  | 92.1  | 62.09 | 85.81  |
| 68038 | 'Chid1'         | 83.45 | 115.4 | 74.6 | 37   | 33.2 | 51.18 | 64   | 100.3 | 59.04 | 67.79  |
| 68039 | 'Nmb'           | 23.02 | 19.46 | 26.6 | 43.1 | 0    | 0.04  | 6.68 | 36.57 | 3.14  | 17.47  |
| 68040 | 'Zfp593'        | 9.99  | 10.57 | 9.34 | 22   | 0.95 | 4.51  | 6.22 | 6.54  | 2.67  | 6.29   |
| 68041 | 'Mid1ip1'       | 111.5 | 148.2 | 122  | 94.8 | 107  | 201.3 | 72.1 | 129.1 | 108.2 | 191.01 |
| 68043 | 'Eef1akmt1'     | 98.88 | 65.77 | 72.1 | 60.3 | 69   | 138.3 | 80   | 92.67 | 99.48 | 94.92  |
| 68044 | 'Chac2'         | 16.07 | 17.55 | 7.57 | 42.3 | 8.96 | 3.96  | 9.64 | 20.84 | 16.8  | 7.05   |
| 68045 | 'Rtraf'         | 66.22 | 65.13 | 53.2 | 60.1 | 43.7 | 62.1  | 52.3 | 79.21 | 62.58 | 60.31  |
| 68046 | '2700062C07Rik' | 24.98 | 22.75 | 39.6 | 9.91 | 14   | 20.68 | 25.6 | 12.92 | 31.46 | 17.78  |
| 68047 | 'Mpnd'          | 28.55 | 10.75 | 8.69 | 10.7 | 12.6 | 28.8  | 12.9 | 36.33 | 30.93 | 2.98   |
| 68048 | 'Aen'           | 20.18 | 14.14 | 22.1 | 20.9 | 21   | 20.77 | 13.9 | 37.79 | 25    | 22.15  |
| 68050 | 'Akirin1'       | 47.89 | 71.6  | 45.1 | 87.3 | 34.5 | 30.01 | 40.8 | 38.19 | 50.09 | 10.76  |
| 68051 | 'Nutf2'         | 104.9 | 119.5 | 109  | 104  | 117  | 180.5 | 113  | 131.5 | 113.1 | 129.8  |
| 68052 | 'Rps13'         | 235.4 | 280.2 | 312  | 287  | 223  | 377   | 284  | 196   | 297.9 | 166.14 |
| 68053 | 'Ubxn2b'        | 6.21  | 6.28  | 6.67 | 0    | 5.46 | 4.67  | 4.63 | 7.19  | 10.89 | 8.37   |
| 68055 | 'Atp5s'         | 44.47 | 27.2  | 32.5 | 35.2 | 42.6 | 38.79 | 29.4 | 25.89 | 49.31 | 39     |
| 68058 | 'Chd1l'         | 1.56  | 7.38  | 1.36 | 0.02 | 4.28 | 8.05  | 0.58 | 2.87  | 3.5   | 4.75   |
| 68059 | 'Tm9sf2'        | 84.59 | 110.1 | 89.7 | 99.1 | 74.4 | 62.15 | 90.4 | 109   | 104.3 | 95.4   |
| 68066 | 'Slc25a39'      | 207.4 | 240.5 | 119  | 239  | 220  | 212.1 | 192  | 152.5 | 222.1 | 194.48 |
| 68067 | 'Mrnip'         | 33.77 | 50.29 | 30.3 | 45.8 | 31.1 | 83.07 | 47   | 46.71 | 45.92 | 54.15  |
| 68070 | 'Pdzd2'         | 0.85  | 0.5   | 1.88 | 0.49 | 1.09 | 0.11  | 1.57 | 0.44  | 1.32  | 1.35   |
| 68073 | 'Fam173b'       | 15.48 | 6     | 5.66 | 0    | 25.6 | 10.88 | 6.56 | 6.68  | 17.8  | 17.42  |
| 68075 | 'Lurap1'        | 12.65 | 18.59 | 8.86 | 1.46 | 21.4 | 7.13  | 4.81 | 3.48  | 3.94  | 8.08   |
| 68077 | 'Nop53'         | 50.83 | 40.9  | 60.4 | 61.4 | 49.9 | 39.05 | 60.6 | 69.89 | 42.92 | 46.32  |
| 68079 | 'Pdcd2l'        | 27.27 | 24.07 | 15.9 | 37.6 | 32.8 | 34.39 | 23.5 | 34.46 | 48.26 | 12.53  |
| 68080 | 'Gpn3'          | 9.87  | 38.13 | 19.2 | 16.5 | 23.8 | 32.68 | 11.4 | 22.44 | 20.02 | 35.55  |
| 68082 | 'Dusp19'        | 2.38  | 9.72  | 12.5 | 0.04 | 10.2 | 2.85  | 5.24 | 4.59  | 5.18  | 4.11   |
| 68083 | 'Pak1ip1'       | 63.74 | 51.18 | 50.6 | 44.2 | 45.8 | 55.31 | 60.9 | 62.33 | 38.48 | 34.09  |
| 68087 | 'Dcakd'         | 42.35 | 47.54 | 18.7 | 24.3 | 40   | 45.1  | 20.7 | 18.64 | 31.6  | 19.75  |
| 68089 | 'Arpc4'         | 83.09 | 91.11 | 84.7 | 86.3 | 111  | 162.6 | 112  | 97.11 | 84.37 | 91.89  |
| 68090 | 'Yif1a'         | 18.47 | 31.22 | 22.6 | 39.8 | 22.5 | 29.42 | 9.88 | 46.81 | 21.71 | 14.71  |
| 68092 | 'Ncbp2'         | 56.06 | 44.78 | 56   | 57.2 | 49.4 | 67.81 | 27.7 | 54.46 | 36.58 | 41.5   |
| 68094 | 'Smarcc2'       | 22.96 | 17.64 | 31.1 | 17.2 | 26.6 | 8.23  | 20.1 | 24.79 | 27.56 | 22.46  |
| 68095 | 'Ociad1'        | 458.5 | 542.4 | 413  | 377  | 414  | 518.1 | 461  | 506.7 | 348   | 385.74 |
| 68097 | 'Dynll2'        | 27.83 | 14.29 | 21.7 | 15.4 | 43.2 | 23.4  | 32.7 | 21.01 | 28.71 | 15.7   |
| 68098 | 'Rchy1'         | 55.85 | 33.32 | 28.2 | 53.2 | 56.9 | 59.11 | 42.7 | 47.45 | 58.14 | 37.15  |
| 68099 | 'Fam92a'        | 26.64 | 41.43 | 43.5 | 32.6 | 27.2 | 21.11 | 49.3 | 41.85 | 21.09 | 40.74  |
| 68106 | 'Nt5c3b'        | 35.31 | 45.98 | 49.7 | 127  | 36.3 | 69.28 | 57.4 | 62.39 | 37.57 | 48.39  |
| 68107 | 'Cntd1'         | 0     | 0     | 0    | 3.03 | 1.17 | 0     | 2.35 | 0     | 0     | 0      |
| 68112 | 'Entr1'         | 14.37 | 25.46 | 26.7 | 53.3 | 12.7 | 13.82 | 18   | 21.08 | 34.4  | 8.94   |
| 68114 | 'Mum1'          | 24    | 27.32 | 33.2 | 0.18 | 16.3 | 31.16 | 18.4 | 34.84 | 22.81 | 29.46  |
| 68115 | 'Maip1'         | 16.34 | 31.32 | 17.5 | 4.61 | 3.56 | 2.6   | 5.81 | 16.6  | 15.83 | 11.49  |

|       |                 |       |       |      |      |      |       |      |       |       |        |
|-------|-----------------|-------|-------|------|------|------|-------|------|-------|-------|--------|
| 68117 | 'Apool'         | 8.98  | 2.88  | 0.18 | 0.05 | 4.93 | 4.8   | 0    | 12.43 | 5.58  | 8.95   |
| 68118 | 'Atg101'        | 80.02 | 29.13 | 48.9 | 106  | 55.7 | 93.73 | 63.3 | 63.35 | 33.23 | 46.76  |
| 68119 | 'Cmtm3'         | 4.86  | 2.85  | 6.08 | 0    | 3.47 | 6.89  | 6.23 | 4.42  | 0     | 4.32   |
| 68121 | 'Cep70'         | 18.7  | 20.96 | 20.8 | 20.3 | 39.9 | 17.75 | 12   | 22    | 20.85 | 18.64  |
| 68126 | 'Fahd2a'        | 10.69 | 16.71 | 26.9 | 75.7 | 55.3 | 47.21 | 27.9 | 30.28 | 13.57 | 48.8   |
| 68133 | 'Gcsh'          | 68.85 | 69.62 | 112  | 95.8 | 76.6 | 100.2 | 121  | 48.2  | 32.77 | 75.8   |
| 68134 | 'Upf3b'         | 25.06 | 20.07 | 19.7 | 23.3 | 16.6 | 25.15 | 23   | 10.41 | 17.4  | 21.17  |
| 68135 | 'Eif3h'         | 127.3 | 131.5 | 156  | 92.2 | 76.9 | 132.3 | 132  | 104.6 | 95.52 | 151.4  |
| 68137 | 'Kdelr1'        | 49.5  | 83.14 | 42   | 56.3 | 49.5 | 59.72 | 48.3 | 39.5  | 36.28 | 55.72  |
| 68140 | 'Tigd2'         | 9.91  | 13.79 | 9.24 | 14.3 | 9.64 | 10.18 | 1.86 | 10.71 | 8.43  | 3.56   |
| 68142 | 'Ino80'         | 1.62  | 2.68  | 1.09 | 3.64 | 1.36 | 0.23  | 0.68 | 1.71  | 3.18  | 2.48   |
| 68145 | 'Etaa1'         | 0.83  | 0     | 0    | 0    | 0.19 | 0.68  | 0    | 0     | 0.93  | 2.47   |
| 68146 | 'Arl13b'        | 3.38  | 2.6   | 1.09 | 4.53 | 1.44 | 2.88  | 5.39 | 0.88  | 1.12  | 1.98   |
| 68147 | 'Gar1'          | 0.64  | 5.65  | 2.9  | 4.27 | 7.12 | 1.77  | 0    | 2.45  | 0.86  | 1.2    |
| 68149 | 'Otub2'         | 6.55  | 8.49  | 8.24 | 6.18 | 9.78 | 7.36  | 3.41 | 4.48  | 7.76  | 2.39   |
| 68151 | 'Wls'           | 16.93 | 4.06  | 6.07 | 0.32 | 2.84 | 1.51  | 0    | 0     | 0     | 8.64   |
| 68152 | 'Fam133b'       | 10.01 | 5.91  | 14.1 | 11.2 | 6.78 | 16.66 | 4.16 | 6.66  | 14.08 | 6.36   |
| 68153 | 'Gtf2e2'        | 14.49 | 26.78 | 10.3 | 9.16 | 24.7 | 17.89 | 6.56 | 27.42 | 18.07 | 30     |
| 68159 | 'Stx19'         | 0.15  | 0     | 0    | 0    | 0    | 0     | 0    | 0     | 0     | 0.92   |
| 68165 | 'Fdx1l'         | 75.43 | 56.02 | 114  | 51.5 | 107  | 88.5  | 60.1 | 69.77 | 58.77 | 31.9   |
| 68166 | 'Spire1'        | 3.94  | 2.95  | 2.51 | 5.41 | 12.3 | 5.2   | 11.4 | 7.57  | 6.73  | 7.86   |
| 68169 | 'Ndnf'          | 0.01  | 0     | 0    | 0.01 | 0    | 0.28  | 0    | 0     | 0     | 0.01   |
| 68170 | 'B230118H07Rik' | 35.96 | 52.43 | 39.3 | 26.4 | 53.3 | 75.11 | 58.2 | 41.34 | 42.24 | 69.06  |
| 68172 | 'Rpl39l'        | 0     | 9.36  | 0    | 0    | 0    | 0     | 0    | 0     | 0     | 0      |
| 68176 | 'Inka1'         | 7.9   | 2.43  | 0.05 | 5.94 | 0    | 1.83  | 0    | 17.02 | 13.06 | 19.48  |
| 68177 | 'Ebp1'          | 21.66 | 20.66 | 18.1 | 50.8 | 17.4 | 25.24 | 21.2 | 27.29 | 31.35 | 25.24  |
| 68178 | 'Cgnl1'         | 0.1   | 0     | 0.59 | 0    | 0    | 0     | 0    | 0.01  | 0.05  | 0      |
| 68183 | 'Bcas2'         | 147.1 | 165.1 | 165  | 168  | 138  | 191.4 | 155  | 140.6 | 152.4 | 151.57 |
| 68184 | 'Denr'          | 85.56 | 80.51 | 93.9 | 116  | 87.1 | 119.2 | 80.1 | 100.2 | 98.43 | 77.4   |
| 68185 | 'Coa4'          | 19.6  | 3.87  | 0.07 | 0    | 32.5 | 43.65 | 3.97 | 31.61 | 17.35 | 19.31  |
| 68187 | 'Fam135a'       | 3.27  | 1.68  | 4.23 | 4    | 2.07 | 0.39  | 3.46 | 3.26  | 2.05  | 3.43   |
| 68188 | 'Sympk'         | 2.17  | 3.36  | 10.3 | 11.1 | 2.09 | 2.28  | 5.2  | 4.44  | 5.06  | 1.69   |
| 68192 | 'Leprotl1'      | 61.06 | 40.3  | 25.6 | 32.1 | 37.6 | 44.94 | 25.4 | 18.89 | 19.97 | 51.18  |
| 68193 | 'Rpl24'         | 285.2 | 272.7 | 311  | 431  | 242  | 306.1 | 252  | 214.8 | 195.2 | 229.78 |
| 68194 | 'Ndufb4'        | 387.3 | 364.6 | 402  | 539  | 412  | 682.4 | 467  | 318.1 | 646.2 | 471.35 |
| 68195 | 'Rnaset2b'      | 27.91 | 34.61 | 33.9 | 18.9 | 19.1 | 53    | 46.7 | 22.98 | 32.79 | 13.2   |
| 68196 | 'Hsbp1'         | 687.3 | 560.1 | 504  | 720  | 693  | 728.2 | 396  | 582.7 | 523   | 459.47 |
| 68197 | 'Ndufc2'        | 496.7 | 516.5 | 526  | 580  | 421  | 498.9 | 436  | 403.3 | 389.5 | 435.78 |
| 68198 | 'Ndufb2'        | 330.6 | 358.3 | 468  | 400  | 319  | 619.7 | 418  | 270.2 | 472.4 | 333.57 |
| 68201 | 'Ccadc34'       | 14.43 | 12.78 | 16.7 | 11.6 | 8.57 | 17.95 | 9.1  | 6.03  | 8.16  | 13.15  |
| 68202 | 'Ndufa5'        | 313   | 383.4 | 368  | 391  | 302  | 616.3 | 358  | 219.4 | 534.5 | 292.64 |
| 68203 | 'Diras2'        | 6.67  | 0.71  | 5.45 | 0    | 5.36 | 0.05  | 6.24 | 4.42  | 4.5   | 2.61   |
| 68205 | 'Urm1'          | 7.76  | 3.25  | 6.08 | 0    | 4.13 | 4.85  | 8.68 | 11.44 | 17.11 | 12.79  |
| 68209 | 'Rnaseh2c'      | 23.31 | 27.34 | 24.8 | 14.4 | 37.3 | 38.25 | 60   | 28.19 | 63.82 | 45.17  |
| 68212 | 'Tmbim4'        | 73.4  | 99.68 | 97.9 | 145  | 104  | 159.3 | 149  | 123   | 174.3 | 92.67  |
| 68215 | 'Fam98b'        | 2.09  | 9.63  | 1.37 | 11.8 | 8.36 | 16.7  | 9.23 | 2.67  | 10.9  | 7.69   |
| 68219 | 'Nudt21'        | 47.15 | 25.75 | 65.8 | 29.9 | 44.4 | 36.05 | 49.2 | 69.81 | 61.64 | 33.53  |
| 68222 | 'Fam166a'       | 0     | 0     | 0.1  | 0    | 0    | 0.46  | 0    | 0     | 0     | 0.59   |
| 68226 | 'Efcab2'        | 7.04  | 5.48  | 9.66 | 7.96 | 5.88 | 5.68  | 12.5 | 3.03  | 3.27  | 14.38  |
| 68229 | 'Spindoc'       | 1.2   | 2.94  | 3.2  | 7.93 | 11.2 | 3.88  | 2.99 | 2.71  | 15.01 | 3.32   |
| 68233 | 'Fam229a'       | 1.92  | 1.22  | 3.21 | 2.94 | 1.93 | 9.55  | 2.55 | 1.11  | 9.72  | 12.51  |
| 68235 | 'Mturn'         | 11.46 | 14.83 | 11.1 | 8.99 | 4.31 | 1.65  | 7.52 | 5.39  | 12.68 | 10.58  |
| 68236 | 'Gtsf1l'        | 0.11  | 0.06  | 0.06 | 0    | 0    | 0     | 0    | 0     | 0     | 0      |
| 68240 | 'Rpa3'          | 10.88 | 13.05 | 5.69 | 0    | 19.3 | 21    | 0    | 13.89 | 14.64 | 13.21  |
| 68241 | 'Mcrip2'        | 9.3   | 9.45  | 29.7 | 11.7 | 25.3 | 1.84  | 9.92 | 10.62 | 14.47 | 13.59  |
| 68250 | 'Ciao2a'        | 43.17 | 34.94 | 34.6 | 27   | 10.5 | 17.69 | 52.2 | 20.85 | 29.92 | 55.52  |
| 68251 | 'Babam1'        | 63.27 | 76.2  | 96   | 89.2 | 77.8 | 98.42 | 79.5 | 75.54 | 61.52 | 51.14  |
| 68255 | 'Tmem86b'       | 1.25  | 5.51  | 1.36 | 1.24 | 4.93 | 2.27  | 0.32 | 0.62  | 2.75  | 0.96   |

|       |                 |       |       |      |      |      |       |      |       |       |        |
|-------|-----------------|-------|-------|------|------|------|-------|------|-------|-------|--------|
| 68259 | 'lft80'         | 4.92  | 9.57  | 4.85 | 10.8 | 9.86 | 0     | 9.88 | 3.48  | 3.83  | 2.32   |
| 68260 | 'Trmt12'        | 3.15  | 4.12  | 5.65 | 3.71 | 5.77 | 2.89  | 8.42 | 7.34  | 6.64  | 3.11   |
| 68262 | 'Agpat4'        | 79.65 | 78.91 | 65.4 | 48.1 | 54.3 | 50.98 | 39   | 59.05 | 56.53 | 59.54  |
| 68263 | 'Pdhb'          | 205.5 | 166.5 | 177  | 149  | 239  | 235.9 | 179  | 196.4 | 153.5 | 186.42 |
| 68267 | 'Slc25a22'      | 55.67 | 71.5  | 84.2 | 48.9 | 49.9 | 57.57 | 103  | 68.39 | 89.05 | 63.31  |
| 68268 | 'Zdhhc21'       | 1.61  | 1.6   | 3.41 | 4.52 | 2.73 | 0.31  | 3.6  | 2.51  | 0.7   | 1.69   |
| 68270 | 'Dnaaf1'        | 0.03  | 0     | 0    | 0    | 0    | 0     | 0    | 0     | 0     | 0      |
| 68272 | 'Rbm28'         | 9     | 12.36 | 6.01 | 10.5 | 7.51 | 10.95 | 13.9 | 7.57  | 10.98 | 16.28  |
| 68273 | 'Pomgnt1'       | 1.89  | 16.24 | 5.11 | 17.7 | 10.6 | 10.12 | 20.1 | 5.94  | 25.32 | 12.2   |
| 68274 | 'Toporsl'       | 0     | 0     | 0    | 0    | 0    | 0.02  | 0    | 0     | 0     | 0      |
| 68275 | 'Rpa1'          | 23.38 | 26.52 | 14.9 | 11.4 | 30.5 | 42.19 | 15.3 | 25.96 | 26.81 | 31.47  |
| 68276 | 'Toe1'          | 11.63 | 19.73 | 16.1 | 0    | 13.7 | 4.35  | 0.06 | 15.52 | 26.91 | 3.67   |
| 68277 | '2310057M21Rik' | 16.46 | 20.76 | 16.7 | 19.9 | 18.4 | 2.88  | 8.4  | 15.31 | 5.58  | 29.89  |
| 68278 | 'Ddx39'         | 12.88 | 30.54 | 29.5 | 11.1 | 22.8 | 39.01 | 0.03 | 26.66 | 25.27 | 33     |
| 68279 | 'Mcoln2'        | 0     | 0     | 1.32 | 0    | 0    | 0     | 0    | 0     | 0     | 0      |
| 68281 | '4930430F08Rik' | 9.11  | 12.9  | 5.83 | 13.5 | 2.44 | 2.45  | 1.83 | 7.71  | 3.92  | 4      |
| 68283 | '9530077C05Rik' | 13.81 | 9.57  | 9.76 | 3.92 | 9.41 | 9.47  | 0.26 | 16.33 | 10.56 | 16.63  |
| 68291 | 'Mto1'          | 19.09 | 22.82 | 12.2 | 17.3 | 7.58 | 13.59 | 20.9 | 23.39 | 15.81 | 20.63  |
| 68292 | 'Stt3b'         | 2.72  | 2.36  | 0.59 | 5.84 | 6.61 | 1.96  | 3.44 | 1.8   | 7.26  | 3.52   |
| 68294 | 'Mfsd10'        | 24.79 | 20.09 | 23   | 11.2 | 29.8 | 33.83 | 36.8 | 21.04 | 25.53 | 19.82  |
| 68295 | 'Aar2'          | 20.68 | 27.88 | 32.7 | 15.5 | 44.7 | 25.12 | 40.3 | 33.25 | 18.49 | 30.48  |
| 68298 | 'Ncapd2'        | 0.03  | 2.29  | 14.1 | 1.76 | 1.78 | 0     | 0.04 | 1.7   | 0     | 2.45   |
| 68299 | 'Vps53'         | 30.34 | 35.8  | 26.6 | 35.6 | 32.8 | 40.58 | 22.2 | 40.97 | 34.59 | 20.3   |
| 68303 | 'Fam114a1'      | 1.94  | 0     | 3.2  | 1.68 | 0    | 1.45  | 13.1 | 2.23  | 0.01  | 1.39   |
| 68304 | 'Kdelc2'        | 0.18  | 0.64  | 0.3  | 3.41 | 2.05 | 3.13  | 0.18 | 0.73  | 1.31  | 1.83   |
| 68307 | 'Lrriq4'        | 0     | 1.4   | 0    | 0    | 0.76 | 0     | 0    | 0     | 0     | 2.22   |
| 68310 | 'Zmym1'         | 20.23 | 17.94 | 4.48 | 0.03 | 9.77 | 10.01 | 0.34 | 13.81 | 8.8   | 5      |
| 68311 | 'Lypd2'         | 0     | 0     | 0.11 | 0    | 0    | 0     | 0    | 0     | 0     | 0.1    |
| 68312 | 'Gstm7'         | 139.1 | 176.8 | 58.1 | 137  | 80.3 | 89.92 | 74.3 | 154   | 31.7  | 71.06  |
| 68316 | 'Apoo'          | 90.37 | 113.7 | 93.3 | 44.4 | 59   | 88.18 | 119  | 127.7 | 61.18 | 74.9   |
| 68318 | 'Aph1c'         | 2.55  | 0.92  | 1.4  | 1.66 | 2.35 | 0.21  | 2.67 | 0     | 1.05  | 3.24   |
| 68323 | 'Nudt22'        | 13.59 | 15.16 | 18.9 | 23.8 | 6.23 | 18.74 | 20.3 | 16.16 | 27.32 | 8.84   |
| 68327 | 'Tsr3'          | 21.77 | 13.93 | 48   | 16.9 | 36.5 | 58.79 | 37.4 | 37.14 | 18.74 | 58.29  |
| 68328 | 'Rab13'         | 7.17  | 1.47  | 3.27 | 0    | 7.85 | 24.7  | 6.34 | 1.61  | 6.75  | 1.44   |
| 68332 | 'Sdhaf1'        | 20.85 | 16.55 | 42.8 | 31.3 | 42.4 | 89.65 | 31.9 | 22.78 | 44.53 | 9.92   |
| 68337 | 'Crip2'         | 187.6 | 143   | 245  | 249  | 186  | 247.2 | 104  | 162.4 | 147   | 232.1  |
| 68338 | 'Golt1a'        | 0     | 0     | 0    | 4.2  | 0    | 0     | 0    | 0     | 0     | 0      |
| 68339 | 'Ccdc88c'       | 0.01  | 1.05  | 0.39 | 1.46 | 2.83 | 0.31  | 0.77 | 0.09  | 0.54  | 0.46   |
| 68342 | 'Ndufb10'       | 510.1 | 504.6 | 525  | 627  | 717  | 694.3 | 607  | 665.4 | 554.6 | 662.41 |
| 68344 | 'Tmem174'       | 0     | 0     | 0    | 6.49 | 0    | 0     | 2.93 | 0     | 1.48  | 0      |
| 68346 | 'Sirt5'         | 8.39  | 9.31  | 18.6 | 22.9 | 16.6 | 23.74 | 30.6 | 24.85 | 8.54  | 13.99  |
| 68347 | 'Mettl26'       | 145.1 | 115.3 | 108  | 238  | 181  | 169   | 114  | 115.7 | 121.9 | 155.49 |
| 68349 | 'Ndufs3'        | 182.2 | 214.4 | 308  | 231  | 295  | 286.3 | 195  | 314.6 | 199.3 | 219.63 |
| 68350 | 'Mul1'          | 14.72 | 18.33 | 24   | 23.8 | 16.6 | 9.3   | 19.5 | 21.63 | 20.93 | 13.86  |
| 68352 | 'Aspdh'         | 0     | 0     | 0    | 0    | 0    | 0     | 0    | 0     | 0     | 3.31   |
| 68364 | '0610030E20Rik' | 3.62  | 2.13  | 3.17 | 2.25 | 2.11 | 3     | 6.01 | 1.66  | 2.97  | 3.06   |
| 68365 | 'Rab14'         | 165.6 | 157.1 | 127  | 84.3 | 119  | 181.2 | 129  | 182.6 | 177.8 | 165.21 |
| 68366 | 'Tmem129'       | 23.69 | 20.34 | 25.7 | 5.75 | 13.6 | 21.06 | 21.2 | 39.07 | 0     | 20.53  |
| 68371 | 'Pbld1'         | 13.62 | 2.9   | 6.82 | 6.89 | 1.66 | 2.2   | 2.08 | 1.4   | 3.39  | 5.59   |
| 68375 | 'Ndufa8'        | 508   | 460.2 | 474  | 550  | 446  | 784.7 | 539  | 664.1 | 733.9 | 659.25 |
| 68379 | 'Ciz1'          | 13.27 | 12.91 | 16.2 | 10.8 | 7.05 | 15.99 | 11.8 | 8.51  | 24.66 | 10.35  |
| 68385 | 'Tlcd1'         | 18.96 | 18.3  | 17.9 | 27.8 | 4.13 | 8.71  | 12.1 | 9.05  | 6.32  | 10.87  |
| 68393 | 'Mogat1'        | 0.04  | 0.28  | 0.73 | 0    | 0.48 | 6.28  | 0.38 | 0.34  | 0.08  | 1.34   |
| 68394 | 'Ccdc163'       | 1.37  | 5.14  | 5.31 | 11.2 | 6.31 | 6.96  | 4.36 | 1.58  | 1.94  | 7.21   |
| 68396 | 'Nat8'          | 8.21  | 2.78  | 0    | 0    | 0.56 | 2.36  | 0    | 0.57  | 9.96  | 0      |
| 68401 | 'G6pc3'         | 68.84 | 49.19 | 45.8 | 34.3 | 57.9 | 77.28 | 88.1 | 61.56 | 58    | 42.15  |
| 68404 | 'Nrn1'          | 30.57 | 5.11  | 0    | 0.14 | 55.6 | 42.35 | 73.2 | 12.13 | 49.65 | 62.72  |
| 68420 | 'Ankrd13a'      | 1.37  | 5.5   | 0.09 | 11.5 | 1.05 | 2.53  | 0.76 | 0.47  | 0.01  | 1.58   |

|       |            |       |       |      |      |      |       |      |       |       |        |
|-------|------------|-------|-------|------|------|------|-------|------|-------|-------|--------|
| 68421 | 'Lmbrd1'   | 39.85 | 24.67 | 41.7 | 25.5 | 21.4 | 14.05 | 29.3 | 21.44 | 35.8  | 35.88  |
| 68423 | 'Ankrd13d' | 65.62 | 63.33 | 82.4 | 30.6 | 72.7 | 54.09 | 65.1 | 48.02 | 49.85 | 34.36  |
| 68427 | 'Slc39a13' | 4.89  | 5.88  | 1.49 | 16.2 | 12.1 | 4.13  | 14.8 | 7.95  | 12.54 | 2.86   |
| 68428 | 'Steap3'   | 1.94  | 4.94  | 2.74 | 14.5 | 0.04 | 0     | 4.82 | 1.85  | 2.59  | 5.8    |
| 68431 | 'Fbxl15'   | 35.33 | 20.18 | 35.5 | 20.2 | 34.8 | 39.65 | 13.8 | 32.01 | 28.79 | 50.66  |
| 68436 | 'Rpl34'    | 193.1 | 221.1 | 255  | 302  | 155  | 395   | 172  | 169.1 | 267.9 | 226.26 |
| 68440 | 'Dusp23'   | 0.19  | 0.03  | 1.76 | 5.44 | 2.08 | 0     | 5.52 | 3.74  | 7.08  | 14.01  |
| 68441 | 'Rraga'    | 209.7 | 221   | 187  | 98.6 | 173  | 190.1 | 194  | 208   | 252.5 | 176.6  |
| 68449 | 'Tbc1d10b' | 1.54  | 1.08  | 5.57 | 0.64 | 6.08 | 3.38  | 0.57 | 1.44  | 2.64  | 2.44   |
| 68453 | 'Gpihbp1'  | 0     | 0     | 0.06 | 0    | 0.12 | 0.11  | 0    | 0     | 0     | 0      |
| 68458 | 'Ppp1r14a' | 6.84  | 11.55 | 4.1  | 0    | 31.4 | 28.12 | 0    | 2.77  | 5.33  | 0      |
| 68460 | 'Dhrs7c'   | 0     | 0     | 0.04 | 0    | 0    | 0     | 0    | 0.18  | 0     | 0      |
| 68463 | 'Mrpl14'   | 80.65 | 123.4 | 88.6 | 90.4 | 82.7 | 92.7  | 71.8 | 116.4 | 113.3 | 84.46  |
| 68465 | 'Adipor2'  | 11.4  | 9.81  | 4.14 | 2.04 | 13.7 | 12.91 | 0.02 | 4.74  | 11.56 | 3.67   |
| 68472 | 'Tmem126b' | 76.47 | 63.5  | 40.3 | 53.3 | 50.5 | 86.27 | 27.6 | 100.3 | 90.77 | 73.02  |
| 68473 | 'Mob1b'    | 0     | 1.2   | 1.17 | 0.52 | 0.23 | 2.19  | 1.86 | 1.9   | 3.45  | 0      |
| 68475 | 'Ssna1'    | 130.9 | 115.4 | 136  | 157  | 201  | 243.9 | 116  | 139.5 | 153.4 | 149.93 |
| 68477 | 'Rmnd5a'   | 1.79  | 1.67  | 0.85 | 6.48 | 5.25 | 3.37  | 0.01 | 2.84  | 0     | 0.76   |
| 68479 | 'Phf5a'    | 59.18 | 26.49 | 32.3 | 41.7 | 31.6 | 41.46 | 31.4 | 28.42 | 11.48 | 49.39  |
| 68480 | 'Card19'   | 6.7   | 8.68  | 3.88 | 17   | 4.77 | 6.27  | 19.7 | 5.64  | 15.02 | 2.1    |
| 68481 | 'Mpzl1'    | 5.01  | 2.12  | 30.1 | 9.22 | 7.56 | 2.85  | 35.4 | 2.4   | 8.91  | 1.96   |
| 68487 | 'Tmem140'  | 0     | 0.34  | 0    | 0    | 0    | 0     | 0.05 | 0     | 0     | 0      |
| 68490 | 'Zfp579'   | 3.17  | 1.29  | 2.76 | 4.06 | 3.97 | 7.41  | 5.32 | 1.56  | 5.1   | 0      |
| 68493 | 'Ndufaf4'  | 12.55 | 6.96  | 8.99 | 8.81 | 11.6 | 17.3  | 13.9 | 11.06 | 10.19 | 6.07   |
| 68497 | 'Arel1'    | 4.41  | 4.58  | 11   | 3.6  | 6.17 | 1.39  | 6.11 | 12.51 | 8.47  | 4.98   |
| 68498 | 'Tspan11'  | 1.38  | 0     | 0    | 0    | 1.64 | 0     | 0    | 0     | 0     | 0      |
| 68499 | 'Mrpl53'   | 154.6 | 94.56 | 87.3 | 144  | 133  | 133.1 | 76.6 | 83.36 | 51.95 | 105.86 |
| 68501 | 'Nsmce2'   | 31.88 | 28.87 | 23.3 | 20.2 | 35.9 | 27.64 | 53.8 | 48.19 | 36.15 | 48.66  |
| 68505 | 'Vps51'    | 19.47 | 12.88 | 34.3 | 1.61 | 19.3 | 28.62 | 4.65 | 15.87 | 23.09 | 21.24  |
| 68507 | 'Ppfia4'   | 11.63 | 4.93  | 17.4 | 3.37 | 10.2 | 6.06  | 9.52 | 10.87 | 10.95 | 11.02  |
| 68509 | 'Ptx4'     | 0.03  | 13.27 | 3.73 | 0    | 0    | 0.03  | 8.15 | 4.51  | 0.05  | 0      |
| 68510 | 'Ints1'    | 1.46  | 1.12  | 5.47 | 0    | 4.11 | 1.51  | 2.45 | 2.46  | 3.27  | 2.46   |
| 68511 | 'Dcdc2c'   | 1.16  | 3.25  | 4.01 | 4.29 | 6.38 | 2.41  | 0.66 | 1.39  | 3.52  | 1.44   |
| 68512 | 'Tomm5'    | 121.9 | 109.9 | 164  | 192  | 205  | 138.7 | 120  | 159.5 | 101.5 | 103.62 |
| 68514 | 'Micu2'    | 8.02  | 10.02 | 20.6 | 22   | 4.47 | 1.42  | 12.3 | 5.98  | 6.83  | 6.64   |
| 68515 | 'Myadml2'  | 5.08  | 0.03  | 4.43 | 0    | 0    | 10.69 | 0    | 1.54  | 7.19  | 0      |
| 68519 | 'Eml1'     | 18.34 | 7.06  | 7.22 | 5.5  | 18.2 | 7     | 8.67 | 8.45  | 7.32  | 9.58   |
| 68520 | 'Zfyve21'  | 17.14 | 11.8  | 13.5 | 14.7 | 13.8 | 36.48 | 4.1  | 19.23 | 12.91 | 7.74   |
| 68521 | 'Fam189b'  | 15.98 | 28.1  | 11   | 6.36 | 24   | 10.24 | 15.8 | 17.86 | 25.21 | 26.1   |
| 68523 | 'Ciao2b'   | 83.02 | 85.22 | 108  | 30.5 | 82.6 | 82.68 | 56.1 | 65.43 | 72.18 | 84.76  |
| 68524 | 'Wipf2'    | 2.16  | 1.11  | 2.32 | 7.12 | 3.6  | 0.87  | 5.27 | 2.78  | 5.93  | 3.8    |
| 68525 | 'Evc2'     | 0     | 0.36  | 0.01 | 0    | 0    | 0     | 6.31 | 1.64  | 0     | 0      |
| 68526 | 'Gpr155'   | 8.33  | 2.9   | 10   | 6.76 | 6.11 | 3.35  | 5.09 | 10.74 | 3.03  | 7.58   |
| 68528 | 'Smim6'    | 0     | 0     | 0.05 | 0    | 0    | 0     | 0    | 0     | 0     | 0      |
| 68533 | 'Mphosph6' | 21.57 | 8.8   | 20.6 | 28.8 | 29.4 | 13.66 | 12.6 | 20.21 | 18.53 | 24.05  |
| 68537 | 'Mrpl13'   | 85.19 | 80.98 | 68.5 | 126  | 82.3 | 102.2 | 81   | 68.25 | 73.64 | 68.74  |
| 68539 | 'Tmem109'  | 76.9  | 93.05 | 42.7 | 63.6 | 54.4 | 82.2  | 76.1 | 71.73 | 51.28 | 140.12 |
| 68544 | 'Trir'     | 16.72 | 18.58 | 22.5 | 50.2 | 30.1 | 17.76 | 37.9 | 24.75 | 38.4  | 32.34  |
| 68545 | 'Ecsr'     | 0     | 0     | 0    | 0    | 5.71 | 11.64 | 5.12 | 2.05  | 0     | 0      |
| 68549 | 'Sgo2a'    | 0.07  | 0.12  | 0.2  | 1.04 | 0.13 | 0.21  | 0    | 0.58  | 0.04  | 1.84   |
| 68550 | 'Tefm'     | 12.46 | 10.32 | 8    | 0    | 9.32 | 15.51 | 0.05 | 16.65 | 13.1  | 13.18  |
| 68552 | 'Smim14'   | 120.2 | 109.5 | 91.3 | 131  | 104  | 128.2 | 115  | 126.5 | 121.5 | 109.7  |
| 68553 | 'Col6a4'   | 0.26  | 0.66  | 4.67 | 0    | 0.28 | 0     | 0    | 0.35  | 0     | 1.01   |
| 68554 | 'Cebpzos'  | 81.77 | 55.85 | 63.1 | 46.2 | 60.5 | 87.87 | 61.9 | 71.09 | 68.39 | 60.92  |
| 68556 | 'Uckl1'    | 28.78 | 31.35 | 42.4 | 85.5 | 32   | 53.82 | 10.2 | 38.47 | 46.94 | 37.7   |
| 68558 | 'Ankra2'   | 29.07 | 31.64 | 39   | 37.1 | 23.3 | 38.56 | 23.3 | 32.83 | 25.2  | 14.55  |
| 68559 | 'Pdrgr1'   | 95.2  | 49.57 | 89.5 | 89.9 | 123  | 130.4 | 93.4 | 119.5 | 130.3 | 167.48 |
| 68563 | 'Dpm3'     | 21.45 | 30.16 | 22.3 | 38.1 | 17.1 | 53.47 | 52   | 20.91 | 73.22 | 23.08  |

|       |                 |       |       |      |      |      |       |      |       |       |         |
|-------|-----------------|-------|-------|------|------|------|-------|------|-------|-------|---------|
| 68564 | 'Nufip2'        | 5.59  | 3.97  | 3.52 | 4.73 | 8.82 | 4.8   | 6.39 | 5.99  | 4.28  | 4.65    |
| 68565 | 'Mrps18a'       | 119.5 | 135.7 | 148  | 165  | 174  | 195.7 | 109  | 162.6 | 103.6 | 111.98  |
| 68566 | 'Caly'          | 1150  | 1160  | 1039 | 1373 | 994  | 1379  | 918  | 1162  | 1440  | 1649.15 |
| 68567 | 'Cgref1'        | 26.85 | 25.99 | 34.4 | 25   | 33.7 | 26.66 | 28.4 | 25.71 | 32.33 | 32.35   |
| 68572 | 'Mrpl58'        | 83.69 | 54.48 | 91.5 | 88.6 | 105  | 118.6 | 20.4 | 87.14 | 90.22 | 106.19  |
| 68576 | 'Lamtor5'       | 140.9 | 156.4 | 139  | 178  | 174  | 158   | 160  | 117.3 | 189.9 | 102.59  |
| 68581 | 'Tmed10'        | 80.12 | 79.77 | 61.3 | 66.1 | 77   | 95.15 | 56.7 | 73.87 | 103.1 | 126.82  |
| 68585 | 'Rtn4'          | 96.6  | 37.64 | 46   | 50.6 | 97.7 | 96.72 | 46.7 | 44.23 | 36.67 | 42.26   |
| 68588 | 'Cthrc1'        | 40.59 | 25.31 | 22.2 | 20.5 | 21.7 | 27.32 | 36.6 | 35.36 | 61.25 | 53.01   |
| 68591 | 'Mocos'         | 0.03  | 0.31  | 0.1  | 0    | 0    | 0.03  | 0    | 0     | 2.65  | 0       |
| 68592 | 'Syf2'          | 49.13 | 74.39 | 51.6 | 89.2 | 47.3 | 57.96 | 55.4 | 61.52 | 50.67 | 50.22   |
| 68597 | 'Ccdc167'       | 10.11 | 6.33  | 18.1 | 12.7 | 12.6 | 11.72 | 13.6 | 6.15  | 6.44  | 12.01   |
| 68598 | 'Dnajc8'        | 124.4 | 129.1 | 127  | 163  | 85.5 | 169.5 | 93.9 | 141.8 | 145.2 | 106.67  |
| 68603 | 'Pmvk'          | 84.33 | 70.58 | 95.9 | 141  | 107  | 126.5 | 84.2 | 107.8 | 78.51 | 136.46  |
| 68606 | 'Ppm1f'         | 20.69 | 16.32 | 30.6 | 6.79 | 12   | 9.63  | 24   | 19.42 | 26.14 | 21.16   |
| 68607 | 'Serhl'         | 0     | 3.14  | 16.4 | 11.7 | 0    | 0     | 6.07 | 0     | 0.74  | 0.08    |
| 68611 | 'Mrpl28'        | 148.8 | 124.8 | 128  | 146  | 167  | 296.3 | 131  | 188.1 | 194.1 | 129.97  |
| 68612 | 'Ube2c'         | 0.11  | 0.12  | 0.11 | 0.32 | 0.36 | 0.28  | 0.06 | 0.07  | 0.05  | 0.1     |
| 68614 | 'Letmd1'        | 25.22 | 9.34  | 9.17 | 22.3 | 6.33 | 10.5  | 23.9 | 16.55 | 4.64  | 12.88   |
| 68616 | 'Gdpc3'         | 0     | 0     | 0.09 | 0    | 0    | 0     | 0    | 0     | 0.37  | 0.04    |
| 68617 | 'Mtbl1'         | 0.85  | 0.47  | 1.94 | 5.44 | 1.15 | 1.86  | 1.91 | 2.75  | 0.47  | 2.19    |
| 68618 | '1110012L19Rik' | 34.49 | 29.21 | 43.1 | 21.8 | 41.3 | 45.42 | 16.8 | 27.22 | 58.88 | 34.07   |
| 68625 | 'Cfap57'        | 0     | 0     | 0    | 0    | 0.9  | 0     | 0    | 0.16  | 0     | 0       |
| 68626 | 'Elac2'         | 11.35 | 6.69  | 8.78 | 11.7 | 11.1 | 3.93  | 12.4 | 1.1   | 12.35 | 2.46    |
| 68628 | 'Fbxw9'         | 19.29 | 25.15 | 21.6 | 15.2 | 9.48 | 28.74 | 4.71 | 24.16 | 22.33 | 23.43   |
| 68631 | 'Cryl1'         | 11.03 | 12.18 | 32.4 | 14.3 | 16.9 | 37.74 | 27   | 9.19  | 12.81 | 28.78   |
| 68634 | 'Tm2d3'         | 256.5 | 234.5 | 197  | 268  | 214  | 371   | 222  | 290.1 | 304.8 | 335.91  |
| 68636 | 'Fahd1'         | 22.81 | 25.45 | 23.6 | 31.4 | 16.6 | 34.95 | 26.5 | 23.17 | 9.9   | 18.73   |
| 68642 | 'Tmem216'       | 26.68 | 14.34 | 11.8 | 35.7 | 51.9 | 9.37  | 11.6 | 26.76 | 34.2  | 4.18    |
| 68644 | 'Abhd14a'       | 35.09 | 50.68 | 39.3 | 48.5 | 14.3 | 13.19 | 12.8 | 18.93 | 38.68 | 44      |
| 68646 | 'Nadk2'         | 8.64  | 5.44  | 2.83 | 1.1  | 1.59 | 1.73  | 9.62 | 2.26  | 2.32  | 2.17    |
| 68652 | 'Tab2'          | 2.16  | 3.16  | 1.92 | 8.08 | 4.01 | 1.42  | 7.76 | 3.72  | 2.19  | 6.23    |
| 68653 | 'Samm50'        | 82.46 | 84.29 | 71.8 | 92.3 | 79.7 | 101.6 | 73.1 | 96.85 | 89.68 | 95.23   |
| 68655 | 'Fndc1'         | 1.76  | 0     | 0.77 | 0    | 1.22 | 0     | 2.1  | 0     | 0     | 0.69    |
| 68659 | 'Fam198b'       | 0     | 0.01  | 0.03 | 0.07 | 0.01 | 0     | 0.03 | 0     | 0.03  | 0.02    |
| 68666 | 'Svop'          | 86.25 | 54.97 | 74   | 6.35 | 78.9 | 25.47 | 78.9 | 84.09 | 93.01 | 69.29   |
| 68667 | 'Trpm4'         | 0.85  | 1.28  | 4.81 | 0.01 | 1.62 | 6.61  | 1.79 | 1.19  | 6.81  | 7.05    |
| 68671 | 'Pcyt2'         | 102.2 | 106   | 71.1 | 69.4 | 133  | 127.7 | 132  | 99.26 | 153.1 | 108.08  |
| 68675 | 'Fam172a'       | 10.77 | 11.22 | 14.6 | 29.5 | 8.29 | 2.93  | 7.11 | 9.57  | 4.77  | 4.02    |
| 68678 | 'Smtnl1'        | 0     | 0     | 0.02 | 0    | 0    | 0     | 0    | 0     | 0.56  | 0       |
| 68680 | 'Fitm1'         | 0.1   | 0     | 2.04 | 0    | 0    | 0.11  | 0.11 | 0     | 0.05  | 0       |
| 68682 | 'Slc44a2'       | 10.98 | 8.65  | 9.59 | 12.4 | 11.7 | 10.84 | 12.4 | 11.45 | 15.2  | 12.18   |
| 68691 | 'Kansl1l'       | 0.14  | 0.91  | 1.11 | 3.45 | 1.27 | 1.82  | 0.42 | 0.34  | 0.95  | 1.01    |
| 68693 | 'Hnrnpul2'      | 2.67  | 2.98  | 3.25 | 3.9  | 4.17 | 3.69  | 2.01 | 4.29  | 6.51  | 3.54    |
| 68695 | 'Hddc3'         | 2.56  | 24.36 | 17.3 | 29.6 | 12.3 | 12.28 | 40.1 | 29.26 | 28.79 | 14.38   |
| 68703 | 'Rere'          | 5     | 5.79  | 7.35 | 9.69 | 3.37 | 6.45  | 3.92 | 4.21  | 2.21  | 3.63    |
| 68705 | 'Gtf2f2'        | 18.23 | 14.47 | 11   | 2.92 | 0.61 | 14.29 | 2.35 | 10.87 | 9.68  | 10.41   |
| 68708 | 'Rabl2'         | 59.92 | 69.37 | 45.2 | 49.6 | 52.6 | 58.57 | 80.1 | 58.5  | 53.15 | 42.44   |
| 68709 | 'Cilp2'         | 0.27  | 0.06  | 0    | 0    | 0    | 0     | 0    | 0     | 0.7   | 0       |
| 68713 | 'Ifitm1'        | 0     | 0     | 0    | 0    | 0    | 0.18  | 0    | 0     | 0.09  | 5.24    |
| 68718 | 'Rnf166'        | 5.25  | 15.69 | 5.55 | 0.03 | 4.05 | 18.11 | 14.3 | 11.39 | 18.2  | 5.87    |
| 68721 | '1110032A03Rik' | 46.48 | 38.84 | 28.5 | 40.1 | 45.5 | 42.63 | 33.1 | 38.63 | 26.34 | 43.48   |
| 68724 | 'Arl8a'         | 19.34 | 16.69 | 17.3 | 53.4 | 47.2 | 16.01 | 35   | 9.07  | 16.64 | 26.7    |
| 68725 | '1110032F04Rik' | 0.07  | 0     | 0    | 0    | 1.48 | 0     | 0    | 1.51  | 0     | 1.35    |
| 68728 | 'Trp53inp2'     | 15.78 | 2.21  | 13.3 | 15.2 | 84.2 | 5.46  | 13   | 11.93 | 19.92 | 18.92   |
| 68729 | 'Trim37'        | 19.17 | 13.96 | 32.5 | 22.8 | 21.1 | 26.79 | 14.8 | 22.81 | 26.29 | 16.73   |
| 68730 | 'Dus1l'         | 21.97 | 28.58 | 40.5 | 18.6 | 39   | 33.5  | 25.8 | 27.84 | 19.77 | 24.62   |
| 68731 | 'Rbfa'          | 49.24 | 30.28 | 23.5 | 14.9 | 38.3 | 27.78 | 30.2 | 49.62 | 23.24 | 40.42   |

|       |                 |       |       |      |      |      |       |      |       |       |        |
|-------|-----------------|-------|-------|------|------|------|-------|------|-------|-------|--------|
| 68732 | 'Carmil1'       | 4.03  | 8.96  | 4.58 | 4.16 | 7.6  | 8.57  | 6.44 | 5.11  | 2.67  | 6.29   |
| 68734 | 'Ppp4r3a'       | 3.51  | 3.25  | 1.09 | 6.91 | 2.47 | 1.58  | 1.53 | 1.63  | 4.01  | 2.21   |
| 68735 | 'Mrps18c'       | 147   | 129.9 | 152  | 212  | 183  | 261.1 | 136  | 140.3 | 154.6 | 140.41 |
| 68736 | 'Tyw5'          | 18.73 | 34.57 | 15.7 | 22.7 | 7.78 | 18.45 | 31   | 18.69 | 11.72 | 14.24  |
| 68737 | 'Angel1'        | 4.36  | 0.74  | 0    | 7.23 | 0.01 | 5.97  | 6.8  | 5.27  | 1.42  | 4.99   |
| 68738 | 'Acss1'         | 12.17 | 9.21  | 3.17 | 0.02 | 2.9  | 3.45  | 4.62 | 2.25  | 4.85  | 2.84   |
| 68742 | 'Tmem219'       | 27.01 | 41.48 | 37.1 | 19   | 24.3 | 18.84 | 18.7 | 34.01 | 30.89 | 24.01  |
| 68743 | 'Anln'          | 2.33  | 0.93  | 0    | 0    | 5.7  | 0     | 0.02 | 0     | 2.62  | 0      |
| 68744 | 'Zfp740'        | 4.99  | 2.17  | 6.99 | 24.2 | 5.88 | 2.36  | 5.13 | 3.97  | 8.53  | 2.84   |
| 68750 | 'Rreb1'         | 0.85  | 1.6   | 0    | 6.03 | 0.42 | 0.68  | 0    | 0.48  | 0.2   | 0.01   |
| 68753 | 'Mybphl'        | 0     | 0     | 0    | 0    | 0    | 0     | 0    | 0     | 0     | 0.31   |
| 68755 | 'Cgrff1'        | 37.75 | 53.44 | 54.8 | 27.5 | 28.3 | 45.39 | 24.7 | 56.7  | 20.71 | 33.44  |
| 68758 | 'Abhd11'        | 40.69 | 32.67 | 43.7 | 70   | 51.8 | 126.3 | 43   | 52.21 | 37.95 | 69.38  |
| 68760 | 'Synpo2l'       | 0.12  | 0     | 0.01 | 0.02 | 1.24 | 0     | 0    | 0.01  | 0     | 0      |
| 68764 | 'Cdhr3'         | 0     | 1.7   | 0    | 0    | 0    | 0.02  | 0    | 2.12  | 0     | 0.78   |
| 68767 | 'Washc1'        | 8.32  | 14.25 | 9.86 | 6.73 | 13.5 | 15.14 | 14.6 | 7.31  | 30.86 | 16.87  |
| 68770 | 'Phtf2'         | 2.18  | 2.09  | 3.32 | 4.15 | 0.47 | 2.84  | 3.35 | 2.01  | 1.26  | 2.97   |
| 68774 | 'Ms4a6d'        | 0     | 0     | 0    | 0    | 0    | 0.54  | 0    | 0     | 0     | 0      |
| 68775 | 'Atp6v1c2'      | 3.83  | 0     | 1.72 | 10.4 | 3.59 | 10.83 | 0.03 | 3.12  | 0     | 0      |
| 68776 | 'Taf11'         | 41.6  | 54    | 54.9 | 34.1 | 43.9 | 42.72 | 47.2 | 40.15 | 30.66 | 39.36  |
| 68777 | 'Tmem53'        | 16.83 | 10.01 | 8.33 | 8.72 | 3.67 | 7.73  | 25.2 | 9.26  | 10.5  | 12.74  |
| 68778 | 'Gucd1'         | 2.84  | 6.69  | 6.6  | 0    | 0.02 | 3.03  | 6.51 | 0.1   | 23.27 | 3.47   |
| 68792 | 'SrpX2'         | 0     | 0     | 0    | 0    | 0    | 0     | 3.2  | 0     | 0     | 0      |
| 68794 | 'Finc'          | 0     | 0     | 0.02 | 0    | 0.58 | 0.06  | 0.04 | 0     | 0     | 0.05   |
| 68795 | 'Ubr3'          | 3.77  | 4.27  | 5.35 | 4.73 | 6.22 | 3.15  | 4.84 | 6.93  | 3.19  | 4.38   |
| 68796 | 'Tmem214'       | 25.84 | 25.59 | 47.1 | 24.3 | 27.5 | 19.72 | 22.7 | 5.04  | 36.45 | 18.63  |
| 68797 | 'Pdgfrl'        | 0     | 0     | 0    | 0    | 0    | 0     | 0    | 0     | 0     | 0.84   |
| 68799 | 'Rgmb'          | 7.49  | 5.03  | 1.92 | 14.1 | 4.06 | 1.3   | 8    | 5.87  | 5.25  | 2.26   |
| 68801 | 'Elov15'        | 45.34 | 20.13 | 24.9 | 14.6 | 22.3 | 23.3  | 16.8 | 23.07 | 30.05 | 57.89  |
| 68802 | 'Mypn'          | 0.99  | 0     | 0    | 0    | 0    | 0.01  | 0    | 2.23  | 0     | 0      |
| 68810 | 'Nexn'          | 0.1   | 0.05  | 0.18 | 0    | 0.35 | 0.1   | 0.24 | 0.05  | 0.63  | 0.06   |
| 68813 | 'Dock5'         | 0.03  | 0.76  | 0    | 0    | 0.26 | 0     | 0    | 0.75  | 0     | 0.53   |
| 68815 | 'Btbd10'        | 19.3  | 42.08 | 53.7 | 37.2 | 39.2 | 25.9  | 29.6 | 37.4  | 20.06 | 23.6   |
| 68816 | 'Ppil1'         | 31.85 | 21.57 | 32   | 23.9 | 23.4 | 58.16 | 30   | 67.13 | 68.67 | 16.19  |
| 68817 | 'Ddi2'          | 0.16  | 1.51  | 0    | 0.27 | 0.1  | 0     | 0.04 | 0     | 0     | 0      |
| 68818 | 'Zfand2b'       | 21.12 | 31.45 | 32.7 | 20.8 | 13.7 | 73.72 | 0    | 37.92 | 25.29 | 46.62  |
| 68828 | 'Sync'          | 0.02  | 1.67  | 3.46 | 8.22 | 3.44 | 0     | 0    | 1.21  | 0     | 0      |
| 68832 | 'Ldah'          | 26.88 | 25.57 | 19.7 | 17.1 | 30.8 | 21.74 | 18.1 | 24.94 | 28.29 | 24.72  |
| 68833 | 'Pdcl3'         | 22.7  | 25.95 | 18.9 | 41.2 | 32.2 | 50.19 | 17.9 | 29.24 | 35.68 | 19.11  |
| 68836 | 'Mrpl52'        | 102   | 75.01 | 91.6 | 128  | 76.7 | 164.4 | 103  | 55.24 | 105.8 | 78.12  |
| 68837 | 'Foxk2'         | 3.52  | 2.1   | 2.11 | 2.98 | 3.41 | 1.66  | 1.72 | 1.11  | 0.2   | 1.7    |
| 68839 | 'Ankrd46'       | 80.1  | 124.1 | 155  | 113  | 109  | 100.8 | 143  | 161.3 | 88.48 | 99.09  |
| 68842 | 'Tulp4'         | 12.81 | 8.88  | 5.8  | 10.8 | 8.17 | 8.47  | 1.92 | 2.59  | 8.07  | 10.65  |
| 68845 | 'Pih1d1'        | 17.73 | 12.8  | 31.4 | 9    | 32.7 | 26.5  | 31.3 | 10.55 | 10.04 | 38.69  |
| 68846 | 'Rnf208'        | 66.34 | 67.97 | 78.4 | 25.6 | 78.2 | 69.39 | 114  | 82.57 | 79.48 | 72.61  |
| 68852 | 'Lrrn4cl'       | 6.02  | 0.39  | 5.87 | 0.95 | 0.63 | 7.36  | 4.56 | 0.24  | 6.7   | 0.31   |
| 68854 | 'Asb11'         | 0.09  | 0.04  | 0.3  | 0.09 | 0.04 | 0.13  | 0.04 | 0.06  | 0.21  | 0.03   |
| 68857 | 'Dtwd2'         | 0.62  | 0.15  | 0.86 | 0    | 1.55 | 0     | 0    | 0.01  | 0     | 0      |
| 68859 | 'Smim1'         | 11.1  | 8.54  | 18.4 | 61.6 | 15.3 | 11.2  | 17.4 | 28.87 | 14.85 | 25.27  |
| 68861 | '1190002N15Rik' | 0.6   | 1.82  | 1    | 0    | 1.28 | 0.06  | 2.12 | 4.4   | 2.52  | 1.22   |
| 68865 | 'Arv1'          | 3.13  | 11.62 | 2.16 | 0    | 10.1 | 1.17  | 2.8  | 4.47  | 5.59  | 8.7    |
| 68867 | 'Rnf122'        | 2.12  | 3.05  | 4.39 | 7.69 | 0.71 | 1.59  | 0    | 1.26  | 1.63  | 1.95   |
| 68870 | 'Ak8'           | 5.34  | 3.54  | 3.57 | 7.46 | 3.86 | 13.35 | 4.92 | 4.56  | 4.26  | 9.91   |
| 68874 | 'Klhdc9'        | 26.76 | 15.84 | 21.6 | 35.8 | 28.3 | 25.51 | 21.3 | 13.85 | 14.66 | 14.56  |
| 68875 | 'Tmcc2'         | 5.58  | 5.71  | 3.02 | 6    | 1.12 | 2.49  | 18.3 | 3.92  | 2.53  | 2.25   |
| 68876 | 'Atp23'         | 5.36  | 1.91  | 7.19 | 0.06 | 7.12 | 0.47  | 1.19 | 9.25  | 8.47  | 0.15   |
| 68877 | 'Maf1'          | 98.29 | 92.98 | 100  | 49.8 | 73.8 | 102.2 | 126  | 96.08 | 96.04 | 107.81 |
| 68879 | 'Prpf6'         | 37.86 | 22.24 | 26.3 | 24.9 | 51.4 | 20.44 | 31.7 | 29.26 | 34.49 | 40.25  |



|       |                 |       |       |      |      |      |       |      |       |       |        |
|-------|-----------------|-------|-------|------|------|------|-------|------|-------|-------|--------|
| 68888 | 'Gkn3'          | 0     | 0     | 0    | 0    | 0    | 0     | 0    | 0     | 0     | 0.29   |
| 68889 | 'Ubac2'         | 44.27 | 47.09 | 39.1 | 9.52 | 46.2 | 64.44 | 25   | 46.87 | 28.59 | 45.57  |
| 68895 | 'Rasl11a'       | 11.58 | 12.19 | 6.06 | 13.3 | 0.04 | 0     | 5.53 | 4.36  | 3.65  | 6.87   |
| 68897 | 'Disp1'         | 1.67  | 1.31  | 0.58 | 0.78 | 0    | 1.42  | 5.22 | 1.92  | 0.01  | 4.52   |
| 68904 | 'Abhd13'        | 0.01  | 1.12  | 1.09 | 0.44 | 0.86 | 0     | 0    | 0     | 1.89  | 1.31   |
| 68910 | 'Zfp467'        | 31.15 | 18.54 | 28   | 39.5 | 20.6 | 32.92 | 20.7 | 13.76 | 9.84  | 10.01  |
| 68911 | 'Pygo2'         | 0.83  | 7.79  | 3.57 | 2.69 | 7.85 | 5.39  | 0    | 1.42  | 1.8   | 2.21   |
| 68915 | 'Vars2'         | 2.37  | 1.4   | 1.45 | 4.01 | 4.33 | 5.27  | 1.22 | 0.8   | 4.2   | 3.29   |
| 68916 | 'Cdkal1'        | 4.69  | 5.3   | 5.74 | 1.05 | 8.61 | 5.26  | 3.87 | 6.06  | 4.76  | 5.52   |
| 68917 | 'Hint2'         | 148.3 | 139.9 | 171  | 192  | 247  | 252   | 221  | 145.7 | 181.8 | 211.52 |
| 68918 | '1190005I06Rik' | 1.68  | 8.06  | 0    | 0    | 9.25 | 14.57 | 0    | 2.23  | 11.32 | 6.69   |
| 68920 | '1110065P20Rik' | 37.01 | 28.29 | 73.7 | 28.4 | 55   | 62.98 | 18.9 | 40.51 | 53.23 | 21.47  |
| 68922 | 'Dnaic1'        | 1.16  | 5.96  | 1.34 | 0    | 3.19 | 7.58  | 0.19 | 0.83  | 0.1   | 1.85   |
| 68925 | 'Rpap1'         | 5.42  | 8.78  | 6.71 | 0.04 | 0.9  | 1.47  | 0.2  | 3.57  | 1.49  | 2.57   |
| 68926 | 'Ubap2'         | 5.86  | 9.58  | 6.35 | 3.23 | 3.62 | 6.2   | 4.65 | 7.84  | 11.02 | 9.1    |
| 68927 | 'Ptcd2'         | 35.21 | 32.26 | 31.2 | 38.6 | 18.4 | 70.33 | 64.4 | 27.01 | 28.73 | 45.84  |
| 68929 | 'Mospd3'        | 11.32 | 10.3  | 3.67 | 15.9 | 19.1 | 6.19  | 23.5 | 11.97 | 5.78  | 2.39   |
| 68936 | 'Smim11'        | 35.3  | 33.8  | 54.5 | 36.8 | 27.7 | 35.12 | 46.6 | 39.24 | 45.31 | 49.39  |
| 68938 | 'Aspscr1'       | 45.22 | 71.99 | 79.9 | 74.4 | 86.3 | 94.87 | 36.6 | 102.3 | 93.22 | 68.32  |
| 68939 | 'Rasl11b'       | 6.14  | 12.52 | 8.16 | 64.5 | 9.66 | 14.35 | 0.06 | 5.59  | 2.91  | 1.33   |
| 68942 | 'Chmp2b'        | 46.48 | 58.1  | 41.4 | 37.2 | 35.4 | 35.52 | 37   | 59.88 | 24.27 | 24.16  |
| 68943 | 'Pink1'         | 23.74 | 26.6  | 24.5 | 25.4 | 22.8 | 24.64 | 47.8 | 30.11 | 25.74 | 14.22  |
| 68944 | 'Tmco1'         | 25.16 | 22.98 | 16.5 | 19.9 | 15.2 | 21.57 | 22.2 | 20.34 | 12.06 | 21.46  |
| 68947 | 'Chst8'         | 6.74  | 26.29 | 4.97 | 1.59 | 27   | 47.99 | 53.5 | 4.58  | 0     | 28.54  |
| 68948 | 'Fam216a'       | 219   | 162.8 | 215  | 310  | 126  | 110.8 | 130  | 175.5 | 139.9 | 88.57  |
| 68952 | 'Fam57b'        | 8.25  | 12.27 | 7.5  | 7.33 | 20.5 | 21.11 | 5.97 | 7.73  | 9.98  | 4.93   |
| 68953 | 'Chmp2a'        | 235   | 191   | 230  | 254  | 237  | 197.7 | 152  | 216.1 | 205.4 | 163.38 |
| 68955 | 'Srrm4'         | 3.21  | 2.82  | 5.29 | 10.1 | 7.2  | 4.84  | 3.37 | 5.42  | 8.46  | 9.62   |
| 68957 | 'Paqr6'         | 31.63 | 15.12 | 3.66 | 10.5 | 1.46 | 18.24 | 4.22 | 12.77 | 15.5  | 0.81   |
| 68961 | 'Phkg2'         | 29.29 | 48.55 | 48.8 | 70.9 | 52.1 | 60.99 | 61.8 | 64.8  | 76.5  | 36.04  |
| 68964 | 'Ctc1'          | 11.39 | 10.25 | 16.9 | 13.7 | 8.36 | 6.23  | 4.23 | 10.48 | 10.4  | 19.49  |
| 68966 | 'Ngdn'          | 34.43 | 38.79 | 47.3 | 38.3 | 36.5 | 47    | 48.7 | 26.16 | 26.97 | 21.53  |
| 68968 | 'Cdan1'         | 1.22  | 0.85  | 3.73 | 2.76 | 1.44 | 0.15  | 0.84 | 0     | 1.85  | 0.44   |
| 68969 | 'Eif1b'         | 423.5 | 270.4 | 281  | 308  | 267  | 259   | 198  | 312.9 | 196.5 | 163.99 |
| 68970 | 'Dcaf12'        | 32.56 | 18.92 | 14.3 | 21.7 | 10.1 | 14.99 | 11.6 | 13.35 | 13.34 | 9.47   |
| 68971 | 'Tamm41'        | 16.33 | 11.09 | 37.1 | 21.1 | 30.2 | 28.79 | 55.5 | 30.81 | 28.25 | 20.36  |
| 68972 | 'Tatdn3'        | 4.52  | 13.7  | 17.7 | 25.1 | 7.91 | 12.73 | 30.7 | 13.82 | 21.37 | 9.73   |
| 68975 | 'Med27'         | 23.21 | 25.39 | 38.1 | 37.3 | 11.8 | 45.89 | 27.3 | 31.76 | 43.23 | 37.43  |
| 68977 | 'Haghl'         | 190.8 | 138.9 | 235  | 209  | 368  | 302.9 | 321  | 323.7 | 264.9 | 255.93 |
| 68979 | 'Nol11'         | 11.91 | 13.59 | 8.54 | 33.5 | 11.8 | 1.82  | 23.3 | 14.71 | 2.77  | 17.58  |
| 68980 | 'Wdr53'         | 4.89  | 5     | 17.7 | 27.8 | 7.47 | 10.19 | 11.7 | 19.7  | 9.33  | 8.19   |
| 68981 | 'Snrpa1'        | 29.89 | 46.99 | 34.4 | 33.6 | 38.5 | 39.44 | 21.3 | 39.82 | 38.65 | 42.32  |
| 68988 | 'Prpf31'        | 10.38 | 5.42  | 17.4 | 22.2 | 22   | 14.29 | 15.3 | 14.01 | 5.61  | 11.56  |
| 68991 | 'Ssu72'         | 123.9 | 118.3 | 126  | 185  | 152  | 112.9 | 138  | 109.4 | 154.6 | 133.33 |
| 68992 | 'Zfp580'        | 2.48  | 15.07 | 6.47 | 0.05 | 6.76 | 24.42 | 11   | 4.76  | 9.81  | 19.81  |
| 68995 | 'Mcts1'         | 103.1 | 130.3 | 74.8 | 129  | 68.4 | 72.7  | 94.7 | 137.7 | 92.04 | 105.95 |
| 68999 | 'Anapc10'       | 21.59 | 38.2  | 22.8 | 44.8 | 27.7 | 17.2  | 24.1 | 26.01 | 10.24 | 28.58  |
| 69008 | 'Cab39l'        | 21.5  | 14.06 | 9.68 | 8.83 | 24.1 | 15.64 | 4.77 | 11.92 | 26.44 | 16.74  |
| 69009 | 'Thap7'         | 26.84 | 34.3  | 14.8 | 35.3 | 17.1 | 31.57 | 14.1 | 30.45 | 31.47 | 27.11  |
| 69010 | 'Anapc13'       | 75.11 | 56.12 | 77.3 | 121  | 78.5 | 136.6 | 63.6 | 35.99 | 83.6  | 49.42  |
| 69017 | 'Prrt2'         | 77.92 | 59.68 | 64.9 | 10.9 | 39.1 | 51.71 | 107  | 64.66 | 33.42 | 36.04  |
| 69019 | 'Spcs1'         | 325.2 | 264.3 | 238  | 290  | 262  | 320.1 | 246  | 314.2 | 307.4 | 340.13 |
| 69020 | 'Zfp707'        | 7.06  | 4.95  | 2.58 | 0    | 3.25 | 0     | 0    | 9.37  | 7.65  | 5.13   |
| 69024 | 'Snx15'         | 58.8  | 41.97 | 33.5 | 23.3 | 47.4 | 30.9  | 62.1 | 25.92 | 24.27 | 40.75  |
| 69028 | 'Mitd1'         | 4.26  | 4.53  | 6.52 | 14.7 | 11.8 | 17.56 | 4.87 | 10.83 | 8.38  | 8.71   |
| 69029 | 'Smdt1'         | 355.9 | 249.4 | 287  | 220  | 415  | 323.5 | 201  | 273.3 | 347.1 | 238.52 |
| 69034 | 'Nupr1l'        | 0     | 0     | 0    | 0    | 5.57 | 0     | 4.04 | 2.84  | 0     | 6.65   |
| 69035 | 'Zdhhc3'        | 12.43 | 4.52  | 34.3 | 0    | 2.46 | 7.25  | 22.2 | 7     | 10.35 | 5.35   |

|       |                 |       |       |      |      |      |       |      |       |       |        |
|-------|-----------------|-------|-------|------|------|------|-------|------|-------|-------|--------|
| 69038 | 'Tmem258'       | 188.1 | 230.4 | 117  | 115  | 124  | 187.9 | 160  | 142.2 | 242.1 | 122.5  |
| 69046 | 'Isca1'         | 189.6 | 190   | 185  | 155  | 145  | 160   | 138  | 170.2 | 133.7 | 208.88 |
| 69047 | 'Atp2c2'        | 0     | 5.03  | 1.61 | 0    | 0    | 0.01  | 0    | 1.83  | 0     | 0      |
| 69048 | 'Slc30a5'       | 2.3   | 2.78  | 3.55 | 2.82 | 7.88 | 0.86  | 2.56 | 1.06  | 10.26 | 4.66   |
| 69049 | 'Nat8f5'        | 0.05  | 0     | 0    | 0    | 0    | 0     | 0    | 0     | 0     | 0      |
| 69051 | 'Pycr2'         | 44.51 | 51.88 | 42.6 | 21.9 | 85.1 | 62.31 | 38.5 | 59.71 | 86.38 | 79.91  |
| 69053 | '1810013L24Rik' | 2.93  | 2.44  | 4.38 | 7.41 | 5.17 | 0.41  | 0.13 | 3.58  | 3.7   | 4.35   |
| 69060 | 'Pnlip'         | 0     | 0     | 0.03 | 2.53 | 0    | 0     | 0    | 0     | 0     | 0      |
| 69064 | 'Fuom'          | 9.37  | 23.94 | 17.1 | 20.9 | 13.6 | 24.68 | 14.3 | 13.54 | 16.72 | 15.44  |
| 69065 | 'Chac1'         | 4.52  | 3.68  | 4.52 | 0.18 | 19.9 | 5.15  | 12.3 | 13.67 | 10.04 | 0.27   |
| 69066 | '1810010H24Rik' | 3.76  | 4.04  | 7.23 | 12.6 | 1.02 | 1.16  | 0.05 | 0     | 5.36  | 6.2    |
| 69068 | 'Tcim'          | 0     | 0     | 0    | 0    | 0    | 0.04  | 0    | 0     | 5.03  | 0      |
| 69071 | 'Tmem97'        | 24.45 | 19.23 | 35.4 | 36.3 | 15.7 | 33.12 | 42.1 | 30.32 | 53.54 | 37.51  |
| 69072 | 'Ebna1bp2'      | 31.49 | 20.27 | 26.6 | 35.2 | 19.8 | 38.7  | 28.6 | 25.86 | 15.61 | 18.86  |
| 69076 | 'Triap1'        | 21.15 | 35.83 | 26.9 | 14.2 | 25.5 | 43.49 | 35.2 | 24.44 | 21.16 | 25.55  |
| 69077 | 'Psmc11'        | 119.4 | 137.7 | 88.4 | 113  | 136  | 77.91 | 120  | 144.5 | 104.5 | 108.91 |
| 69080 | 'Gmppa'         | 33.19 | 45.76 | 19.3 | 40.9 | 26.5 | 35.48 | 34.7 | 30.58 | 28.36 | 35.92  |
| 69082 | 'Zc3h15'        | 87.52 | 88.79 | 68.1 | 108  | 48.1 | 67.06 | 55.4 | 69.37 | 99.26 | 74.67  |
| 69085 | 'Zcchc9'        | 13.22 | 7.85  | 20.9 | 43   | 14.1 | 6.55  | 15.7 | 9.17  | 20.06 | 15.48  |
| 69089 | 'Oxa1l'         | 22.12 | 10.49 | 23   | 35.6 | 9.43 | 20.89 | 11.3 | 12.62 | 10.01 | 16.38  |
| 69090 | 'Ascc1'         | 30.94 | 40.6  | 41.7 | 46.5 | 32.3 | 25.15 | 67.5 | 29.51 | 37.33 | 41.14  |
| 69091 | 'Vps26b'        | 9.67  | 15.71 | 17.2 | 7.26 | 2.01 | 10.61 | 12.9 | 8.61  | 9.37  | 5.68   |
| 69094 | 'Tmem160'       | 13.79 | 6.57  | 16.8 | 122  | 17.3 | 12.06 | 0.19 | 5.97  | 18.51 | 0.89   |
| 69097 | 'Trim15'        | 1.71  | 0.51  | 0    | 0    | 5.49 | 0     | 0    | 0     | 0     | 10.98  |
| 69101 | 'Ydjc'          | 44.87 | 27.74 | 23   | 17.8 | 16.2 | 30.23 | 32.4 | 28.57 | 23.32 | 40.01  |
| 69104 | 'March5'        | 4.87  | 6.55  | 8.34 | 42.2 | 8.11 | 2.39  | 13.6 | 2.95  | 18.05 | 2.3    |
| 69106 | 'Stoml1'        | 70.91 | 85.6  | 124  | 97.3 | 78.7 | 83.03 | 131  | 86.82 | 138.5 | 92.48  |
| 69109 | 'Ccnq'          | 44.04 | 22.24 | 44.5 | 12.7 | 46.4 | 52.08 | 26.2 | 37.31 | 22.08 | 40.74  |
| 69113 | 'Alkbh3'        | 21.46 | 11.42 | 11.2 | 2.03 | 10.8 | 0.85  | 28.7 | 5.47  | 11.06 | 19.29  |
| 69116 | 'Ubr4'          | 3.98  | 4.39  | 5.61 | 5.71 | 6.87 | 4     | 2.71 | 5.05  | 6.17  | 2.69   |
| 69121 | 'Chrdl2'        | 0     | 0     | 3.07 | 0    | 0    | 0     | 0    | 0     | 0     | 0      |
| 69123 | 'Eci3'          | 0     | 0     | 0    | 0    | 2.94 | 0     | 0    | 0     | 0     | 0      |
| 69125 | 'Cnot8'         | 35.45 | 66.46 | 45.8 | 59.7 | 64.7 | 75.13 | 88.6 | 54.47 | 62.1  | 41.49  |
| 69126 | '1810022K09Rik' | 191.9 | 235.5 | 204  | 225  | 113  | 260.7 | 170  | 126.5 | 172.7 | 137.69 |
| 69129 | 'Pex11g'        | 2.72  | 0     | 0.1  | 0    | 6.49 | 8.75  | 2.05 | 3.3   | 1.52  | 2.33   |
| 69131 | 'Cdk12'         | 0.57  | 2.68  | 2.39 | 11.7 | 2.37 | 0.45  | 2.98 | 1.15  | 2.78  | 2.05   |
| 69136 | 'Tusc1'         | 0     | 0     | 0.11 | 4.13 | 0.26 | 0     | 0    | 0.66  | 0.35  | 0      |
| 69137 | 'Vstm5'         | 0.82  | 6.42  | 25.1 | 8.76 | 12.6 | 6     | 5.69 | 25.37 | 10.63 | 11.42  |
| 69146 | 'Gsdmd'         | 0     | 0     | 0    | 0    | 0    | 0     | 0    | 0     | 0     | 2.97   |
| 69147 | '2200002J24Rik' | 0     | 0     | 0.14 | 0.08 | 0    | 0.07  | 0.07 | 0     | 0     | 0.06   |
| 69149 | 'Kbtbd3'        | 7.25  | 3.55  | 7.8  | 2.45 | 4.29 | 7.16  | 7.11 | 8.25  | 8.13  | 3.81   |
| 69150 | 'Snx4'          | 45.8  | 60.94 | 52.8 | 26.7 | 50.9 | 34.81 | 51.3 | 41.26 | 52.93 | 57.73  |
| 69151 | 'Lzic'          | 8.99  | 9.34  | 0    | 4.57 | 0.97 | 9.62  | 0    | 11.1  | 8.84  | 0.6    |
| 69155 | '1810030O07Rik' | 17.84 | 8.25  | 17.6 | 26.2 | 18.3 | 15.78 | 28.6 | 25.82 | 14.18 | 16.23  |
| 69156 | 'Comtd1'        | 17.22 | 17.5  | 23.8 | 20.6 | 24.7 | 37.39 | 28.7 | 26.48 | 21.57 | 46.8   |
| 69159 | 'Rhebl1'        | 9.62  | 9.03  | 0.04 | 0    | 26   | 16.47 | 0.09 | 4.69  | 5.89  | 8.17   |
| 69161 | 'Manbal'        | 89.69 | 95.01 | 86.2 | 81.3 | 104  | 126.2 | 113  | 111.3 | 107.4 | 135.15 |
| 69162 | 'Sec31a'        | 11.19 | 7.58  | 18.5 | 4.64 | 11.6 | 7.67  | 7.79 | 7.75  | 35.93 | 12.68  |
| 69163 | 'Mrpl44'        | 56.18 | 26.57 | 29.4 | 34.3 | 30.1 | 32.65 | 43   | 48.17 | 22.33 | 47.56  |
| 69168 | 'Bola1'         | 37    | 37.3  | 45.3 | 43.5 | 63.9 | 52.69 | 49.4 | 65.33 | 47.54 | 33.34  |
| 69169 | 'Fcmr'          | 0     | 0.85  | 0    | 0    | 0    | 0.12  | 0    | 0     | 0     | 0.64   |
| 69171 | 'Cnppd1'        | 8.93  | 13.22 | 10.2 | 9.95 | 6.88 | 9.6   | 12.2 | 6.1   | 8.61  | 12.75  |
| 69178 | 'Snx5'          | 22.58 | 29.62 | 30.9 | 27.3 | 16.9 | 14.63 | 18   | 19.25 | 13    | 36.61  |
| 69179 | 'Tmem110'       | 2.33  | 0.27  | 3.8  | 0    | 4.58 | 0.16  | 4.98 | 0.51  | 2.34  | 0.7    |
| 69181 | 'Dyrk2'         | 0.01  | 2.95  | 1.13 | 4.49 | 0.12 | 0.84  | 1.86 | 0.04  | 0.54  | 1.52   |
| 69183 | 'C1qtnf2'       | 4.37  | 1.14  | 2.56 | 0    | 4.99 | 0     | 0.93 | 0     | 4.04  | 0      |
| 69185 | 'Dtwd1'         | 15.99 | 24.86 | 16.4 | 11.9 | 2.28 | 6.04  | 5.35 | 11.85 | 10.21 | 7.38   |
| 69186 | 'Tmem256'       | 113.9 | 111.3 | 143  | 192  | 113  | 173.6 | 151  | 99.79 | 87.36 | 72.53  |



|       |                 |       |       |      |      |      |       |      |       |       |        |
|-------|-----------------|-------|-------|------|------|------|-------|------|-------|-------|--------|
| 69379 | 'C8g'           | 9.4   | 4.23  | 0.55 | 26.5 | 10.4 | 0.29  | 8.53 | 0.05  | 0.11  | 8.95   |
| 69384 | 'Tmem89'        | 0     | 0     | 0    | 0    | 0    | 0     | 0    | 0     | 0     | 4.58   |
| 69386 | 'Hist1h4h'      | 3.55  | 9.79  | 5.48 | 20.2 | 16.1 | 14.46 | 8.78 | 3     | 13.41 | 13.23  |
| 69387 | 'Dnajb13'       | 0     | 0     | 0    | 0    | 0    | 0     | 0    | 0     | 0     | 4.26   |
| 69399 | '1700025G04Rik' | 2.57  | 8.24  | 5.45 | 1.31 | 1.69 | 3.32  | 2.56 | 3.27  | 12.13 | 1.49   |
| 69408 | 'Dnajc17'       | 27.08 | 39.07 | 18.3 | 42.8 | 21.2 | 23.72 | 3.65 | 20.3  | 6.15  | 24.65  |
| 69428 | '1700016C15Rik' | 0     | 0     | 0.1  | 1.02 | 0    | 0     | 0    | 0     | 0     | 0      |
| 69440 | 'Dennd6b'       | 40.7  | 22.8  | 40.3 | 30.2 | 40.6 | 33.66 | 29.3 | 23.2  | 41.33 | 38.02  |
| 69441 | '1700023F06Rik' | 5.06  | 10.6  | 7.7  | 20.6 | 6.92 | 16.24 | 9.38 | 9.15  | 13.07 | 9.79   |
| 69453 | 'Prss56'        | 0     | 0     | 0.29 | 0    | 0    | 2.72  | 3.43 | 0.76  | 0     | 1.85   |
| 69454 | 'Clic3'         | 0     | 0     | 0.57 | 0    | 0    | 0     | 0    | 0     | 0     | 0.45   |
| 69456 | 'Commd10'       | 27.15 | 37.63 | 26.5 | 67.7 | 34   | 29.59 | 31.5 | 41.17 | 48.73 | 36.79  |
| 69459 | 'Ubl7'          | 95.14 | 116.9 | 122  | 173  | 83.1 | 158.8 | 92.6 | 109.4 | 111.7 | 90.79  |
| 69462 | 'Slurp2'        | 0     | 4.65  | 0    | 0    | 0    | 0     | 0    | 0     | 0     | 0      |
| 69470 | 'Tmem127'       | 9.46  | 10.59 | 20.1 | 3.94 | 9.17 | 7.97  | 4.76 | 9.99  | 7.87  | 6.44   |
| 69478 | '2300009A05Rik' | 11.39 | 18.56 | 16.3 | 24.7 | 16   | 6.13  | 8.99 | 11.2  | 40.02 | 1.48   |
| 69479 | '1700029J07Rik' | 1.42  | 2.92  | 4.44 | 4.52 | 3.67 | 1.62  | 6.93 | 3.17  | 9.76  | 3.73   |
| 69480 | 'Ttc9'          | 4.4   | 1.64  | 3.43 | 0    | 0    | 3.17  | 4.93 | 5.99  | 5.76  | 0.54   |
| 69482 | 'Nup35'         | 23.01 | 10.04 | 7.06 | 17.6 | 0.25 | 10.65 | 19.7 | 21.7  | 7.02  | 12.1   |
| 69487 | 'Ndufaf5'       | 80.68 | 53.25 | 71.4 | 49.9 | 47.6 | 62.15 | 86   | 40.46 | 62.71 | 64.05  |
| 69496 | 'Dydc1'         | 0     | 0     | 0    | 0    | 0.11 | 0     | 0    | 0     | 0.1   | 0      |
| 69499 | 'Tsr2'          | 66.8  | 50.61 | 68   | 73.8 | 46.2 | 40.02 | 30.9 | 74.15 | 54.51 | 39.29  |
| 69504 | 'Zfp932'        | 22.63 | 15.17 | 21.3 | 34.9 | 17.7 | 11.81 | 35.4 | 20.39 | 26.22 | 24.99  |
| 69519 | 'Rwdd2a'        | 180   | 204.4 | 138  | 162  | 99.7 | 126.9 | 198  | 282.5 | 143.1 | 166.58 |
| 69524 | 'Esam'          | 2.2   | 0     | 0    | 0    | 6.67 | 0     | 0    | 0     | 0     | 4.92   |
| 69527 | 'Mrps9'         | 34.78 | 33.61 | 21.7 | 10.9 | 25.4 | 36.86 | 32.1 | 45.05 | 39.79 | 38.98  |
| 69528 | '1700030J22Rik' | 4.41  | 1.97  | 6.04 | 0    | 4.94 | 4.55  | 0.04 | 1.38  | 2.61  | 4.88   |
| 69534 | 'Avpi1'         | 35.93 | 44.21 | 38.9 | 104  | 51.5 | 46.04 | 35.7 | 28.24 | 78.04 | 11.14  |
| 69535 | 'Ten1'          | 75.38 | 44.11 | 66.3 | 75.8 | 70.2 | 64.4  | 53.3 | 59.96 | 92.68 | 56.91  |
| 69536 | 'Hemk1'         | 22.65 | 27.16 | 4.53 | 6.35 | 9.81 | 13.57 | 6.47 | 16.32 | 10.79 | 12.31  |
| 69537 | 'Dnase1l1'      | 0     | 0     | 0    | 13.9 | 9.18 | 0     | 0.04 | 2.32  | 0.27  | 0      |
| 69538 | 'Antxr1'        | 1.24  | 0     | 0.68 | 0    | 0.74 | 0     | 1.14 | 0     | 0     | 0.01   |
| 69539 | 'Trnp1'         | 0     | 0     | 1.44 | 1.81 | 7.75 | 6.63  | 4.48 | 0     | 3.25  | 0.03   |
| 69541 | 'Lyg1'          | 0.13  | 0     | 0    | 0    | 0    | 0     | 0    | 0     | 0     | 0      |
| 69543 | 'Capns2'        | 1.98  | 0     | 1.08 | 7.17 | 0    | 0.14  | 0    | 0     | 0     | 0      |
| 69544 | 'Wdr5b'         | 0     | 3.52  | 0.03 | 0    | 0    | 0     | 9.84 | 1.78  | 6.94  | 0      |
| 69546 | 'Mapk1ip1'      | 38.25 | 47.76 | 35.5 | 56.9 | 30.9 | 15.5  | 50.7 | 34.01 | 47.52 | 31.56  |
| 69547 | 'Nkpd1'         | 2.73  | 3.05  | 2.48 | 0    | 0.04 | 3.91  | 1.26 | 2.17  | 5.42  | 1.5    |
| 69549 | '2310009B15Rik' | 20.41 | 9.81  | 31.4 | 27.7 | 16   | 42.4  | 15.5 | 6.4   | 26.64 | 29.58  |
| 69550 | 'Bst2'          | 0.06  | 2.24  | 4.9  | 27.8 | 7.3  | 14.57 | 0    | 3.65  | 9.27  | 8.67   |
| 69551 | '2310022B05Rik' | 3.37  | 2.07  | 0.59 | 12.7 | 1.28 | 0.35  | 2.05 | 1.11  | 3.48  | 1.95   |
| 69553 | 'Ripor3'        | 0     | 0     | 0    | 0    | 2.04 | 0     | 0    | 0.03  | 0     | 0      |
| 69554 | 'Klhdcc2'       | 57.38 | 66.03 | 46   | 138  | 44   | 55.06 | 52.7 | 36.34 | 69.45 | 31.77  |
| 69556 | 'Bod1'          | 9.88  | 25.65 | 15   | 32.1 | 15.2 | 17.64 | 15.8 | 17.07 | 19.43 | 17.26  |
| 69562 | 'Cdk13'         | 1.6   | 1.71  | 1.02 | 5.73 | 2.33 | 1.02  | 2.83 | 2.65  | 1.48  | 0.9    |
| 69563 | 'Mrln'          | 0     | 5.11  | 0    | 0    | 0.3  | 6.74  | 0    | 0     | 4.99  | 1.71   |
| 69564 | 'Nmrk2'         | 0.14  | 0.13  | 1    | 18.4 | 0.05 | 0.05  | 0.12 | 0.06  | 0.23  | 0.16   |
| 69568 | 'Vkorc1l1'      | 3.85  | 3.66  | 7.22 | 0.33 | 6.66 | 0.95  | 2.87 | 1.12  | 5.86  | 5.5    |
| 69572 | 'Mfsd3'         | 2.03  | 4.18  | 12.7 | 4.27 | 8.94 | 16.6  | 8.9  | 11.94 | 7.44  | 14.78  |
| 69573 | 'Hilpda'        | 2.6   | 18.5  | 15.5 | 16.2 | 31.1 | 34.08 | 29.1 | 17.73 | 17.56 | 7.79   |
| 69574 | 'Cmb1'          | 30.72 | 61.09 | 24.6 | 9.21 | 3.15 | 22.04 | 36.6 | 58.63 | 2.95  | 8      |
| 69576 | 'Smco1'         | 2.13  | 3.4   | 3.97 | 7.47 | 5.74 | 3.65  | 2.73 | 1.8   | 2.89  | 5.09   |
| 69577 | 'Fastkd3'       | 9.57  | 9.59  | 9.14 | 0.03 | 15.9 | 10.03 | 20.3 | 8.52  | 6.41  | 0.69   |
| 69579 | '2310034P14Rik' | 0     | 0     | 0    | 0    | 1.05 | 0     | 0    | 0     | 0     | 0      |
| 69581 | 'Rhou'          | 1.82  | 3.05  | 1.89 | 0.85 | 6.06 | 1.19  | 0    | 0.59  | 3.12  | 1.35   |
| 69582 | 'Plekhd2'       | 4.56  | 0.85  | 0.53 | 8.45 | 3.87 | 4.19  | 1.61 | 1.51  | 7.15  | 2.32   |
| 69585 | 'Hfe2'          | 5.41  | 3.52  | 4.77 | 0    | 5.15 | 7.15  | 2.85 | 3.71  | 3.19  | 13.4   |
| 69587 | 'Pcgf3'         | 5.58  | 0.61  | 2.4  | 7.64 | 0.26 | 0     | 1.05 | 0.38  | 0.68  | 0.44   |

|       |                 |       |       |      |      |      |       |      |       |       |        |
|-------|-----------------|-------|-------|------|------|------|-------|------|-------|-------|--------|
| 69590 | 'Gpx8'          | 11.64 | 2.8   | 0    | 0    | 0.32 | 0.05  | 1    | 0     | 0     | 1.61   |
| 69596 | 'Ap5s1'         | 13.13 | 11.71 | 12.2 | 14.1 | 13.6 | 23.6  | 6.15 | 23.56 | 14.15 | 19.24  |
| 69597 | 'Afg3l2'        | 20.91 | 24.41 | 42   | 28.6 | 19.7 | 10.69 | 27.4 | 16.72 | 30.6  | 6.38   |
| 69601 | 'Dab2ip'        | 3.29  | 5.69  | 3.98 | 9.91 | 9.53 | 6.92  | 1.44 | 3.14  | 2.87  | 5.81   |
| 69605 | 'Lnpc'          | 6.33  | 4.31  | 4.29 | 2.33 | 7.16 | 3.31  | 5.17 | 4.15  | 6.87  | 5.08   |
| 69606 | 'Mfamt'         | 2.32  | 12.95 | 10.4 | 11.9 | 13.1 | 15.71 | 13.1 | 18.52 | 9.25  | 14.33  |
| 69608 | 'Sec24d'        | 0.16  | 13.25 | 8.59 | 14.2 | 2.08 | 0.17  | 3.38 | 7.97  | 2.95  | 3.86   |
| 69612 | 'Kansl2'        | 14.65 | 8.24  | 15.9 | 43.1 | 16.5 | 16.42 | 30.4 | 9.71  | 17.16 | 6.94   |
| 69617 | 'Pitrm1'        | 19.58 | 15.55 | 9.08 | 0    | 3.15 | 13.77 | 15   | 13.68 | 5.8   | 14.84  |
| 69623 | 'Zfp33b'        | 4.3   | 0     | 0.65 | 0.03 | 5.71 | 0.18  | 4.56 | 2.58  | 0.12  | 2.9    |
| 69627 | 'Fam89a'        | 2.87  | 0.07  | 0    | 15.6 | 0    | 0     | 2.41 | 0.03  | 0     | 0      |
| 69632 | 'Arhgef12'      | 1.81  | 2.39  | 1.58 | 3.28 | 1.56 | 2.14  | 0.7  | 4.15  | 4.57  | 1.87   |
| 69634 | 'Clybl'         | 23.07 | 21.6  | 23.1 | 25.7 | 50.4 | 53.14 | 48.4 | 37.34 | 57.73 | 22.79  |
| 69635 | 'Dapk1'         | 6.75  | 7.57  | 1.64 | 2.47 | 5.83 | 3.81  | 1.91 | 10.76 | 3.17  | 4.55   |
| 69638 | 'Enho'          | 30.26 | 11.81 | 23.8 | 20.6 | 6.78 | 41.78 | 23   | 18.65 | 25.56 | 6.02   |
| 69639 | 'Exosc8'        | 8.45  | 26.33 | 8.43 | 20   | 9.06 | 8.84  | 5.39 | 16.07 | 26.62 | 23.3   |
| 69640 | 'Fam83g'        | 0     | 0     | 0    | 0    | 0.01 | 0     | 0    | 0     | 0     | 0      |
| 69641 | 'Wdr20'         | 3.05  | 7.16  | 1.9  | 7.16 | 6.64 | 5.44  | 3.83 | 3.33  | 3.78  | 4.56   |
| 69642 | 'Mlip'          | 1.28  | 2.22  | 2.25 | 0.05 | 0    | 0.05  | 0.87 | 0     | 1.02  | 0.01   |
| 69654 | 'Dctn2'         | 174.8 | 166.2 | 169  | 161  | 136  | 192.5 | 173  | 147.6 | 125.7 | 174.88 |
| 69655 | 'Cd164l2'       | 0     | 0.45  | 2.33 | 4.69 | 0    | 0     | 0    | 0     | 0     | 10.84  |
| 69656 | 'Pir'           | 4.75  | 17.88 | 1.17 | 13.2 | 0    | 0     | 4.46 | 4.74  | 0.04  | 6.54   |
| 69660 | 'Tmbim1'        | 3.12  | 5.15  | 2.51 | 6.45 | 0.19 | 21.28 | 0    | 5.29  | 1.96  | 4.12   |
| 69662 | '2310061104Rik' | 39.82 | 33.47 | 56.1 | 43.9 | 50.8 | 51.11 | 63.5 | 56.32 | 68.67 | 42.59  |
| 69663 | 'Ddx51'         | 3.88  | 2.84  | 1.95 | 0    | 2.36 | 0     | 0.41 | 0     | 1.28  | 2.74   |
| 69665 | 'Upk3bl'        | 0     | 0     | 0    | 0    | 0    | 0     | 3.24 | 0     | 0     | 0      |
| 69666 | 'Psmg4'         | 33.79 | 21.02 | 20.3 | 43.9 | 21.3 | 28.08 | 4.68 | 10.77 | 20.73 | 20.29  |
| 69668 | 'Ccdc115'       | 29.33 | 29.46 | 34.5 | 18.4 | 53.5 | 22.14 | 40.2 | 55.41 | 32.13 | 38.12  |
| 69671 | 'Tmem52'        | 0     | 0     | 0    | 0    | 2.94 | 0     | 0    | 0.05  | 0     | 2.06   |
| 69672 | 'Txndc15'       | 198.4 | 182.3 | 174  | 132  | 153  | 162.2 | 143  | 171   | 157.8 | 146.15 |
| 69674 | 'Mif4gd'        | 7.46  | 7.9   | 12   | 13.6 | 4.23 | 11.66 | 6.72 | 9.03  | 13.65 | 3.26   |
| 69675 | 'Pxnd'          | 1.83  | 1.96  | 2.1  | 9.58 | 2.35 | 0.33  | 4.44 | 0.46  | 3.01  | 0.43   |
| 69683 | 'Emc10'         | 60.43 | 53.73 | 94.8 | 189  | 61.1 | 100.2 | 77.8 | 49.39 | 97.86 | 45.39  |
| 69684 | 'Aarsd1'        | 113.6 | 84.16 | 108  | 51.6 | 86.4 | 130.2 | 66.6 | 106.2 | 128.5 | 107.79 |
| 69692 | 'Hddc2'         | 58.77 | 70.58 | 78.4 | 141  | 59.7 | 79.59 | 37.2 | 112.6 | 41.57 | 78.9   |
| 69694 | 'Tatdn1'        | 5.93  | 4.83  | 4.36 | 6.72 | 3.79 | 12.07 | 15.5 | 6.54  | 10    | 8.34   |
| 69697 | 'Camsap3'       | 0.36  | 0.47  | 7.28 | 5.24 | 2.75 | 1.81  | 3.95 | 2.53  | 7.1   | 1.44   |
| 69700 | 'Col22a1'       | 0     | 1.22  | 0    | 0    | 0    | 0     | 0    | 0     | 0.01  | 0      |
| 69702 | 'Ndufaf1'       | 18.27 | 25.74 | 18.9 | 8.55 | 24   | 21.14 | 37   | 30.06 | 31.55 | 28.28  |
| 69707 | 'lqcg'          | 3.76  | 3.86  | 0    | 0.13 | 0.45 | 1.86  | 0    | 0.18  | 0.45  | 1.31   |
| 69709 | 'Ptrhd1'        | 6.42  | 3.98  | 8.39 | 6.67 | 4.67 | 3.45  | 4.78 | 3.17  | 5.09  | 4.64   |
| 69710 | 'Arap1'         | 4.18  | 1.2   | 1.93 | 1.41 | 0.21 | 0.57  | 3.92 | 2.61  | 0     | 4.48   |
| 69713 | 'Pin4'          | 142.1 | 85.53 | 71.1 | 136  | 96   | 106.9 | 113  | 67.08 | 149.8 | 103.96 |
| 69714 | 'Tfpt'          | 21.03 | 28.31 | 30.6 | 40.8 | 28.8 | 29.17 | 58.9 | 26.67 | 99.63 | 14.17  |
| 69716 | 'Trip13'        | 0     | 3.53  | 0    | 0    | 0    | 4.62  | 1.36 | 0     | 0.83  | 0      |
| 69717 | 'Gm10499'       | 0     | 0.04  | 0.15 | 0.09 | 0    | 0     | 0    | 0     | 0.1   | 0      |
| 69718 | 'lpmk'          | 2.57  | 1.45  | 1.94 | 1.88 | 1.12 | 0.83  | 1.67 | 0.61  | 0.22  | 0.55   |
| 69719 | 'Cad'           | 0.9   | 1.67  | 0.98 | 0.43 | 0    | 0     | 1.3  | 0.45  | 0.07  | 2.36   |
| 69721 | 'Nkiras1'       | 150.3 | 137.3 | 109  | 217  | 144  | 239.1 | 63.5 | 149.4 | 120.7 | 133.86 |
| 69723 | 'Rpain'         | 18.93 | 30.49 | 22.5 | 23.7 | 13.3 | 9.9   | 22.6 | 16.56 | 14.25 | 27.15  |
| 69724 | 'Rnaseh2a'      | 39.69 | 20.2  | 21.6 | 5.63 | 30.2 | 16.05 | 65.6 | 16.52 | 6.34  | 38.13  |
| 69726 | 'Smyd3'         | 42.4  | 41.76 | 38.8 | 57.7 | 23.7 | 73.39 | 62.8 | 38.54 | 72.09 | 50.58  |
| 69727 | 'Usp46'         | 16.68 | 14.45 | 21.6 | 10.8 | 11.8 | 3.49  | 35.6 | 15.38 | 25.84 | 17.28  |
| 69731 | 'Gemin7'        | 139.8 | 78.65 | 115  | 118  | 117  | 95.86 | 138  | 89.88 | 102.4 | 40.09  |
| 69736 | 'Nup37'         | 8.19  | 2.59  | 1.27 | 4.03 | 8.37 | 4.37  | 10.8 | 5.96  | 1.14  | 4.87   |
| 69737 | 'Ttl'           | 7.82  | 1.65  | 6.33 | 11.8 | 5.82 | 1.32  | 6.51 | 7.93  | 4.57  | 5.06   |
| 69740 | 'Dph5'          | 33.39 | 23.13 | 20.5 | 46.3 | 28.5 | 23.43 | 20.3 | 35.38 | 34.64 | 19.14  |
| 69742 | 'Tm2d2'         | 204   | 160.3 | 224  | 222  | 145  | 214   | 145  | 210   | 195.2 | 173.96 |

|       |                 |       |       |      |      |      |       |      |       |       |        |
|-------|-----------------|-------|-------|------|------|------|-------|------|-------|-------|--------|
| 69743 | 'Casz1'         | 0.43  | 0.89  | 0.71 | 1.23 | 2.19 | 1.36  | 1.22 | 0.87  | 1.27  | 0.33   |
| 69745 | 'Pold4'         | 20.78 | 51.79 | 12.3 | 19.7 | 33.6 | 53.31 | 21.6 | 35.1  | 29.1  | 47.58  |
| 69747 | 'Zswim7'        | 12.31 | 9.61  | 10.3 | 29.5 | 21.1 | 22.93 | 19.2 | 22.24 | 32.54 | 42.19  |
| 69748 | 'Aldh16a1'      | 1.13  | 1.82  | 12.6 | 0    | 5    | 6.47  | 0.04 | 2.65  | 4.66  | 9.78   |
| 69752 | 'Zfp511'        | 21.39 | 17.07 | 17.6 | 15   | 12.7 | 43.36 | 13.2 | 23.26 | 13.67 | 34.66  |
| 69754 | 'Fbxo7'         | 23.23 | 33.04 | 40.9 | 22.4 | 24   | 52.99 | 65.3 | 29.89 | 22.09 | 32.94  |
| 69757 | 'Leng1'         | 9.61  | 5.06  | 8.43 | 8.73 | 5.69 | 16.87 | 4.06 | 13.5  | 3.62  | 2.96   |
| 69761 | '1600015I10Rik' | 0     | 1.04  | 0    | 0    | 0    | 0     | 0    | 0     | 0     | 0      |
| 69769 | 'Tnfaip8l2'     | 3.89  | 0     | 0.66 | 0    | 0    | 16.45 | 0    | 0     | 0     | 0      |
| 69770 | '1600002K03Rik' | 25.24 | 2.54  | 2.3  | 0    | 8.68 | 8.24  | 4.55 | 8.78  | 7.09  | 3.76   |
| 69772 | 'Bdh2'          | 2.2   | 0     | 9.72 | 0    | 0    | 5.98  | 0    | 2.75  | 11.56 | 3.85   |
| 69773 | 'Timm29'        | 19.73 | 8.05  | 8.54 | 30.4 | 12.4 | 4.84  | 15.7 | 5.66  | 38.46 | 8.67   |
| 69780 | 'Smap2'         | 20.26 | 12.05 | 14.9 | 10.7 | 13.4 | 31.08 | 13   | 11.78 | 11.97 | 11.26  |
| 69784 | '1500009L16Rik' | 74.87 | 128.4 | 45.2 | 119  | 57.3 | 71    | 23.4 | 85.81 | 53.92 | 37.75  |
| 69786 | 'Tprkb'         | 45.08 | 40.11 | 31.9 | 25.4 | 56   | 29.34 | 73.8 | 26.02 | 35.05 | 27.08  |
| 69787 | 'Anxa13'        | 0     | 0.25  | 0    | 0    | 0    | 0     | 0    | 0     | 0     | 0      |
| 69790 | 'Med30'         | 37.56 | 37.67 | 59.5 | 30.3 | 38.7 | 31    | 70.7 | 29.28 | 27.74 | 18.01  |
| 69792 | 'Med6'          | 23.36 | 24.83 | 11.7 | 41.7 | 14.5 | 24.66 | 20.6 | 36.89 | 32.58 | 41.3   |
| 69802 | 'Cox11'         | 4.02  | 4.14  | 2.54 | 14.6 | 6.2  | 0     | 2.41 | 0.07  | 1.86  | 1.82   |
| 69804 | 'Tmem147'       | 255.1 | 118.8 | 258  | 238  | 272  | 288.7 | 228  | 267.8 | 292.5 | 258.21 |
| 69806 | 'Slc39a11'      | 14.26 | 18.89 | 15.9 | 18.3 | 22.9 | 13.24 | 19.1 | 11.83 | 19.88 | 54.52  |
| 69807 | 'Trim32'        | 88.74 | 91.52 | 70.6 | 38.9 | 71.1 | 59.97 | 136  | 109   | 65.05 | 71.37  |
| 69814 | 'Prss32'        | 0     | 0     | 0    | 0    | 0    | 0     | 0    | 0     | 0.06  | 0      |
| 69815 | 'Krtcap3'       | 12.99 | 3.49  | 1.84 | 9.14 | 14.6 | 0     | 0    | 0.74  | 2.99  | 7.68   |
| 69821 | 'Mterf4'        | 16.16 | 12.93 | 12.1 | 24.1 | 9.24 | 33.31 | 17.2 | 10.97 | 7.11  | 0.75   |
| 69823 | 'Fyttd1'        | 53.32 | 52.93 | 56.6 | 82.9 | 50.8 | 27.67 | 48.1 | 53.56 | 69.19 | 47.8   |
| 69824 | 'Glod5'         | 0     | 0     | 6.98 | 0    | 0    | 0     | 0    | 0     | 4.28  | 3.97   |
| 69833 | 'Polr2f'        | 154.5 | 128.5 | 152  | 174  | 116  | 120.6 | 110  | 119.9 | 147.6 | 134.78 |
| 69834 | 'Rab43'         | 0.36  | 1.31  | 2.06 | 0.19 | 0.05 | 0.09  | 0    | 0.62  | 0.36  | 0.03   |
| 69837 | 'Pcgf1'         | 30.48 | 30.69 | 10.3 | 12.2 | 61.6 | 56.81 | 30.7 | 37.21 | 43.71 | 37.94  |
| 69847 | 'Wnk4'          | 0     | 0.07  | 0.58 | 0    | 0.88 | 0.18  | 0.57 | 0.13  | 0     | 0.04   |
| 69852 | 'Tcf23'         | 0     | 0.01  | 0    | 0    | 0    | 0     | 0    | 0     | 0     | 0      |
| 69860 | 'Eif1ad'        | 5.18  | 12.26 | 29.2 | 26.2 | 15.2 | 20.37 | 25.8 | 30.2  | 33.28 | 12.17  |
| 69863 | 'Ttc39b'        | 1.3   | 0.77  | 2.79 | 0.86 | 1.35 | 0.15  | 2.4  | 1.9   | 0.01  | 2.14   |
| 69865 | 'A1cf'          | 0     | 0.03  | 0.01 | 0    | 0    | 0.01  | 0    | 0     | 0.01  | 0      |
| 69870 | 'Polr3gl'       | 22.82 | 23.79 | 24   | 38.7 | 52.6 | 37.59 | 39.3 | 20.55 | 39.1  | 46.85  |
| 69871 | 'Ppp1r35'       | 12.16 | 8.59  | 12.4 | 29.1 | 13.4 | 3.31  | 8.49 | 8.52  | 9.51  | 4.89   |
| 69875 | 'Ndufa11'       | 109.3 | 123.9 | 157  | 174  | 145  | 151.6 | 164  | 119.7 | 113.6 | 119.96 |
| 69876 | 'Thap3'         | 28.12 | 36.74 | 19.1 | 42.7 | 35.6 | 50.9  | 26.8 | 17.91 | 26.87 | 53.1   |
| 69878 | 'Snrpf'         | 51.22 | 56.64 | 66.3 | 55.2 | 43.3 | 79.07 | 67.1 | 36.9  | 74.81 | 71.25  |
| 69882 | 'Ints14'        | 10.21 | 15.56 | 3.92 | 8.2  | 7.6  | 7.11  | 1.58 | 11.79 | 4.32  | 3      |
| 69885 | 'Aunip'         | 0     | 1.51  | 0    | 0    | 0    | 0     | 0    | 0     | 0     | 0      |
| 69890 | 'Zfp219'        | 10.58 | 12.97 | 18.7 | 10.5 | 13.7 | 1.57  | 12.5 | 11.1  | 14.35 | 11.08  |
| 69893 | 'Coa7'          | 8.51  | 8.53  | 2.9  | 15.7 | 8.42 | 12.16 | 7.73 | 19.43 | 18.31 | 3.42   |
| 69894 | 'Fam241b'       | 101.6 | 112.7 | 84   | 60   | 112  | 112.1 | 97.7 | 89.47 | 117.7 | 136.68 |
| 69900 | 'Mfsd11'        | 29.91 | 31.99 | 12.7 | 27.8 | 14.6 | 15.45 | 22.3 | 33.12 | 23.8  | 27.8   |
| 69902 | 'Mrto4'         | 64.05 | 39.21 | 74.4 | 20.9 | 53.2 | 69.95 | 36.5 | 54.55 | 37.05 | 27.23  |
| 69903 | 'Rasip1'        | 2.96  | 1.51  | 4.8  | 1.39 | 1.05 | 2.29  | 1.49 | 2.64  | 1.65  | 5.77   |
| 69906 | 'Slc25a32'      | 1.92  | 1.86  | 0.85 | 2.24 | 4.22 | 0.02  | 9.54 | 1.39  | 4.78  | 0.23   |
| 69908 | 'Rab3b'         | 90.37 | 198   | 65.3 | 82.7 | 268  | 158.3 | 40.8 | 27.78 | 136.6 | 228.2  |
| 69912 | 'Nup43'         | 4.68  | 0.61  | 16.2 | 11.8 | 21.9 | 8.22  | 19.2 | 5.08  | 6.97  | 26.51  |
| 69917 | 'Nabp2'         | 120.6 | 118.2 | 87.4 | 103  | 66.1 | 126.4 | 111  | 133.4 | 111.1 | 96.77  |
| 69920 | 'Polr2i'        | 50.05 | 49.66 | 51.6 | 42   | 31.7 | 58.04 | 56.2 | 25.95 | 38.35 | 30.19  |
| 69922 | 'Vrk2'          | 0.03  | 2.42  | 0    | 0    | 0    | 0     | 0    | 0     | 0     | 0      |
| 69923 | 'Agk'           | 41.9  | 26.94 | 30.8 | 19.4 | 49.1 | 35.59 | 61.5 | 48.96 | 53.85 | 23.75  |
| 69926 | 'Dnah17'        | 0     | 0.27  | 0    | 0.01 | 0    | 0.25  | 0    | 0     | 0.43  | 0      |
| 69928 | 'Cenps'         | 6.09  | 2.04  | 5.66 | 15.3 | 11.4 | 5.56  | 0.06 | 9.81  | 8.93  | 14.81  |
| 69930 | 'Zfp715'        | 3.48  | 4.99  | 0.5  | 11   | 2.84 | 0.96  | 10.1 | 12.85 | 10.03 | 7.26   |

|       |                 |       |       |      |      |      |       |      |       |       |        |
|-------|-----------------|-------|-------|------|------|------|-------|------|-------|-------|--------|
| 69934 | 'Trmt10b'       | 21.13 | 17.43 | 13.9 | 0.04 | 15.9 | 18    | 9.58 | 23.48 | 21.03 | 19.65  |
| 69938 | 'Scrn1'         | 80.95 | 74.23 | 90.6 | 94.1 | 63.6 | 30.24 | 73.7 | 77.94 | 104.4 | 118.94 |
| 69940 | 'Exoc1'         | 11.49 | 14.35 | 29.8 | 12.8 | 15   | 9.9   | 17.9 | 22.7  | 30.18 | 15.53  |
| 69942 | 'Rnf113a1'      | 8.51  | 25.02 | 7.62 | 0    | 9.2  | 8     | 21.5 | 15.34 | 14.54 | 14.15  |
| 69944 | '2810021J22Rik' | 1.65  | 0.11  | 2.7  | 0.05 | 4.72 | 4.5   | 3.39 | 3.75  | 3.67  | 2.4    |
| 69955 | 'Fars2'         | 20.47 | 19.65 | 9.1  | 11.9 | 21.3 | 23.44 | 13   | 20.16 | 13.93 | 28.56  |
| 69956 | 'Ptdc3'         | 41.59 | 49.24 | 45.1 | 31.8 | 40.9 | 32.12 | 49.9 | 32.83 | 33.56 | 61.42  |
| 69957 | 'Cdc16'         | 54.96 | 21.41 | 48.3 | 76.1 | 30.6 | 5.87  | 54.6 | 32.1  | 54.63 | 7.38   |
| 69961 | 'Rpp25l'        | 26.83 | 49.3  | 29.2 | 51.7 | 28.7 | 29.3  | 46.1 | 38.65 | 53.53 | 52.32  |
| 69962 | 'Mettl18'       | 8     | 8.35  | 4.32 | 0    | 3.74 | 1.91  | 5.78 | 1.67  | 8.52  | 5.97   |
| 69976 | 'Galk2'         | 34.85 | 52.26 | 57.2 | 32.9 | 44.9 | 56.45 | 21.1 | 43.38 | 37.28 | 50.6   |
| 69981 | 'Tmem30a'       | 88.98 | 51.54 | 83.2 | 117  | 55.4 | 26.96 | 83.7 | 56.03 | 89.29 | 41.11  |
| 69987 | 'Spaca9'        | 5.25  | 0.08  | 0.08 | 0    | 0    | 8.92  | 6.39 | 7.21  | 0     | 1.58   |
| 69993 | 'Chn2'          | 20.47 | 2.46  | 5.02 | 0    | 4.73 | 9.55  | 17.1 | 2.3   | 38.06 | 12.47  |
| 69994 | 'Rsc1a1'        | 0     | 0     | 4.4  | 0    | 0    | 0.04  | 1.73 | 1.04  | 0.06  | 3.79   |
| 70009 | 'Ssty2'         | 0     | 0     | 0    | 0    | 0    | 0     | 0    | 0     | 0.12  | 0      |
| 70012 | 'Cep85'         | 2.33  | 1.5   | 5.21 | 0    | 4.3  | 0.44  | 0.4  | 6.58  | 0     | 2.23   |
| 70020 | 'Ino80b'        | 0.09  | 1.1   | 0    | 2.22 | 0    | 2.92  | 0    | 1.72  | 4.16  | 2.85   |
| 70021 | 'Nt5dc2'        | 0     | 0     | 0.03 | 0.04 | 2.02 | 0     | 6.46 | 0.03  | 0     | 0      |
| 70024 | 'Mcm10'         | 0.02  | 0.02  | 0.05 | 0.02 | 0    | 0     | 0    | 0.03  | 0.04  | 0.63   |
| 70025 | 'Acot7'         | 691.9 | 565.4 | 546  | 588  | 571  | 735.9 | 629  | 570.8 | 521.6 | 640.45 |
| 70028 | 'Dop1b'         | 11.13 | 4.97  | 15.8 | 8.34 | 3.99 | 3.7   | 6.04 | 2.08  | 8.45  | 4.59   |
| 70031 | 'Cmtm8'         | 0.64  | 12.85 | 0.06 | 0.8  | 3.01 | 0     | 0.05 | 1.56  | 0.11  | 6.63   |
| 70044 | 'Tut1'          | 13.79 | 12.23 | 12.9 | 12.6 | 24.1 | 10.46 | 8.46 | 18.51 | 16.05 | 18.65  |
| 70045 | '2610528A11Rik' | 0     | 0.07  | 0    | 0    | 0    | 0     | 0    | 0     | 3.94  | 4.51   |
| 70047 | 'Trnt1'         | 24.97 | 50.99 | 18.6 | 35.5 | 26.1 | 23.23 | 34.4 | 39.4  | 28.12 | 25.45  |
| 70052 | 'Prpf4'         | 8.39  | 12.4  | 5.64 | 0.7  | 11.7 | 13.71 | 9.15 | 5.6   | 10.44 | 4.1    |
| 70054 | 'Ccadc89'       | 0     | 2.2   | 0    | 0    | 0    | 0.54  | 0    | 0     | 3.05  | 2.07   |
| 70059 | 'Degs2'         | 0     | 1.2   | 0.27 | 2.18 | 4.73 | 8.38  | 0    | 0.47  | 2.56  | 1.93   |
| 70062 | 'Ctag2'         | 0     | 0     | 0    | 0    | 0    | 0     | 0    | 0.05  | 0     | 0      |
| 70078 | 'Nol7'          | 23.55 | 19.68 | 25.9 | 18.7 | 9.44 | 20.88 | 19.5 | 18.47 | 17.27 | 6.12   |
| 70080 | 'lgsf23'        | 0     | 0     | 0    | 0    | 0    | 0.02  | 0    | 0     | 0.34  | 0      |
| 70081 | 'Zfp995'        | 1.15  | 1.29  | 9.92 | 3.76 | 0.26 | 1.35  | 4.73 | 4.01  | 12.08 | 2.32   |
| 70082 | 'Lysmd2'        | 88.04 | 51.02 | 43   | 80.1 | 38   | 39.53 | 42.3 | 54.23 | 60.43 | 38.35  |
| 70083 | 'Metrn'         | 16.01 | 10.58 | 9.55 | 1.28 | 20.3 | 6.18  | 1.46 | 6.68  | 3.53  | 0.7    |
| 70088 | 'Meaf6'         | 80.21 | 79.19 | 77.2 | 38.2 | 72.5 | 68.73 | 78.8 | 64    | 82.83 | 92.67  |
| 70093 | 'Ube2q1'        | 6.5   | 9.57  | 2.94 | 7.23 | 8.02 | 1.52  | 12.4 | 3.81  | 4.14  | 6.65   |
| 70097 | 'Sash1'         | 0.38  | 0.14  | 0.35 | 0.62 | 0.38 | 1.09  | 0.32 | 0.08  | 0.65  | 0.34   |
| 70099 | 'Smc4'          | 1.04  | 0.68  | 0.5  | 0.01 | 0.05 | 1.36  | 2.73 | 0.62  | 0.98  | 0.71   |
| 70101 | 'Cyp4f16'       | 2.4   | 0     | 7.21 | 8.9  | 2.79 | 0     | 0    | 0     | 4.15  | 3.26   |
| 70103 | 'Znhit1'        | 169.6 | 117   | 92.3 | 166  | 193  | 177.4 | 114  | 176.5 | 164.6 | 140.58 |
| 70110 | 'lfi35'         | 1.52  | 2.98  | 0    | 42.9 | 4.82 | 0     | 0.07 | 0.03  | 0     | 2.81   |
| 70113 | 'Odf3b'         | 5.42  | 2.48  | 10.5 | 0    | 6.52 | 0     | 10.3 | 0.04  | 4.81  | 2.38   |
| 70118 | 'Srrd'          | 0     | 1.47  | 6.45 | 4.37 | 14.1 | 11.47 | 6.15 | 4.73  | 0.21  | 0      |
| 70120 | 'Yars2'         | 9.01  | 4.4   | 0.67 | 8.82 | 5.27 | 17.9  | 0    | 4.95  | 5.66  | 7.66   |
| 70122 | 'MlIt3'         | 2.98  | 1.08  | 4.26 | 0.07 | 3.19 | 3     | 8.26 | 3.01  | 7.95  | 1.68   |
| 70123 | 'Nbdy'          | 136.9 | 171.2 | 169  | 238  | 204  | 312.3 | 221  | 170.9 | 143.9 | 231.32 |
| 70127 | 'Dpf3'          | 2.91  | 0.26  | 1.8  | 0    | 0    | 0.31  | 0.19 | 0     | 6.82  | 0.77   |
| 70129 | 'Slc44a4'       | 0     | 0     | 1.34 | 0    | 4.29 | 0.02  | 0    | 0     | 0     | 0      |
| 70134 | '2210011C24Rik' | 0     | 0     | 3.43 | 0    | 2.38 | 0     | 3.34 | 0     | 0     | 0      |
| 70144 | 'Lrch3'         | 10.36 | 6.5   | 11.8 | 11.4 | 8.17 | 1.38  | 10.9 | 5.89  | 7.54  | 7.38   |
| 70152 | 'Mettl7a1'      | 4.13  | 14.24 | 9    | 7.5  | 7.12 | 13.86 | 7.18 | 8.77  | 9.41  | 10.99  |
| 70153 | '2210016F16Rik' | 26.67 | 16.55 | 15.8 | 22.7 | 11.2 | 27.38 | 8.87 | 35.73 | 35.3  | 31.98  |
| 70155 | 'Ogfrl1'        | 5.25  | 3.08  | 2.8  | 8.08 | 1.51 | 2.62  | 3.52 | 1.31  | 6.18  | 0.43   |
| 70160 | 'Vps36'         | 9.95  | 7.14  | 6.31 | 21.8 | 18.7 | 48.35 | 10.7 | 12.74 | 12.27 | 7.44   |
| 70178 | 'Abhd17c'       | 2.1   | 0     | 2.53 | 6.55 | 0    | 5.49  | 0    | 0.02  | 0     | 0      |
| 70186 | 'Fam162a'       | 72.97 | 60.96 | 95.6 | 61.9 | 65.1 | 51.95 | 118  | 89.99 | 106.2 | 83.27  |
| 70190 | '2610036A22Rik' | 0     | 0.02  | 0.05 | 0    | 0.45 | 0     | 0    | 0     | 0     | 0.6    |





|       |                 |       |       |      |      |      |       |      |       |       |        |
|-------|-----------------|-------|-------|------|------|------|-------|------|-------|-------|--------|
| 70394 | 'Kptn'          | 35.44 | 26.8  | 30.8 | 41.4 | 34.5 | 35.65 | 25.9 | 10.52 | 10.48 | 29.48  |
| 70396 | 'Asnsd1'        | 10.1  | 12.36 | 7    | 21.6 | 9.22 | 16.79 | 3.55 | 11.34 | 3.98  | 27.75  |
| 70397 | 'Tmem70'        | 47.86 | 65.58 | 46   | 31.8 | 38.4 | 59.39 | 34.2 | 60.71 | 43.48 | 67.84  |
| 70408 | 'Polr3f'        | 4.39  | 1.02  | 0.43 | 4.4  | 5.68 | 0.3   | 3.02 | 0.5   | 5.71  | 2.67   |
| 70415 | 'Stk26'         | 2.66  | 3.94  | 1.35 | 0    | 2.63 | 2.84  | 0.89 | 1.19  | 1.67  | 3.24   |
| 70417 | 'Megf10'        | 1.06  | 0.06  | 0    | 2.57 | 2.69 | 0     | 0.01 | 0     | 0     | 0.27   |
| 70420 | 'Arpin'         | 14.52 | 8.5   | 6.44 | 18   | 6.35 | 12.67 | 18.2 | 4.75  | 6.27  | 10.87  |
| 70422 | 'Ints2'         | 4.17  | 3.48  | 1.41 | 4.62 | 1.4  | 0.93  | 2.42 | 3.13  | 1.22  | 2.75   |
| 70423 | 'Tspan15'       | 15.62 | 4.86  | 10.6 | 4.5  | 6.82 | 0.14  | 13.2 | 6.75  | 0.18  | 0.06   |
| 70425 | 'Csnk1g3'       | 1.99  | 3.18  | 1.31 | 4.84 | 6.61 | 2.17  | 5.25 | 1.38  | 0.64  | 2.35   |
| 70426 | 'Tekt5'         | 6     | 13.75 | 7.34 | 0    | 9.71 | 0     | 6.05 | 34.87 | 7.37  | 2.39   |
| 70427 | 'Mier2'         | 7.67  | 11.7  | 17.4 | 7.19 | 3.67 | 2.84  | 13   | 8.87  | 19.41 | 9.33   |
| 70428 | 'Polr3b'        | 5.14  | 5.65  | 3.33 | 6.81 | 1.03 | 2.19  | 0.18 | 3.07  | 6.57  | 1.49   |
| 70430 | 'Tbce'          | 47.48 | 53.97 | 41.5 | 48.5 | 61.4 | 58.98 | 42.6 | 71.08 | 61.84 | 30.36  |
| 70432 | 'Rufy2'         | 21.98 | 24.35 | 36.1 | 17.9 | 36.2 | 34.87 | 11.6 | 31.99 | 54.43 | 32.67  |
| 70433 | 'Draxin'        | 0     | 0     | 0    | 0    | 0    | 0     | 0    | 0     | 0     | 0.13   |
| 70435 | 'Inf2'          | 0.84  | 1.5   | 0.8  | 0.05 | 1.36 | 3.4   | 0.04 | 0.05  | 0.75  | 0.01   |
| 70439 | 'Taf15'         | 17.1  | 6.72  | 7.02 | 3.05 | 16   | 13.81 | 1.4  | 16.93 | 9.9   | 16.5   |
| 70445 | 'Cd248'         | 0     | 0     | 0    | 0    | 1.39 | 0.02  | 2.31 | 0     | 0     | 0      |
| 70450 | 'Unc13d'        | 0     | 0.94  | 0    | 0    | 0    | 0     | 0    | 0     | 0     | 0.35   |
| 70451 | 'Dhrs13'        | 13.16 | 15.8  | 8.33 | 0.36 | 9.69 | 6.14  | 15.3 | 18.52 | 6.96  | 9.47   |
| 70454 | 'Cenpl'         | 0     | 0.48  | 0    | 0.07 | 0    | 0.02  | 0    | 0     | 0     | 0.46   |
| 70456 | 'Mpc2'          | 219.9 | 172.2 | 250  | 202  | 253  | 172.1 | 196  | 163.7 | 219.3 | 168.19 |
| 70458 | '2610318N02Rik' | 3.92  | 2.36  | 11.1 | 0    | 4.02 | 0     | 0    | 1.83  | 6.31  | 7.73   |
| 70461 | 'Crtc3'         | 2.86  | 2.47  | 1.61 | 6.96 | 2.79 | 3.97  | 2.38 | 1.03  | 1.48  | 2.5    |
| 70465 | 'Wdr77'         | 39.64 | 23.06 | 19.5 | 18.6 | 43.8 | 29.24 | 19.1 | 31.96 | 47.13 | 32.72  |
| 70470 | 'Rprd1b'        | 8.36  | 6.91  | 12.5 | 16.3 | 16.2 | 5.21  | 22.1 | 6.29  | 11.59 | 6.07   |
| 70472 | 'Atad2'         | 1.99  | 0.75  | 2.45 | 0.18 | 0.69 | 1.52  | 1.98 | 0.07  | 0.13  | 3.09   |
| 70478 | 'Mipep'         | 1.11  | 1.37  | 2.51 | 3.58 | 3.53 | 0.68  | 5.33 | 4.08  | 3.73  | 0.02   |
| 70481 | 'Pnma1'         | 12.52 | 11.81 | 23.5 | 22.2 | 18.7 | 7.3   | 13.3 | 16.82 | 3.19  | 9.82   |
| 70484 | 'Slc35d2'       | 0.02  | 0.04  | 0.18 | 0.18 | 4.18 | 0.04  | 0.3  | 0.17  | 0.26  | 0.15   |
| 70495 | 'Atp6ap2'       | 262.4 | 372.9 | 313  | 274  | 228  | 298.6 | 247  | 327.6 | 245.8 | 355.96 |
| 70497 | 'Arhgap17'      | 0.02  | 4.52  | 1.11 | 0    | 0.5  | 1.84  | 0    | 2.23  | 2.51  | 0.55   |
| 70503 | 'Ddo'           | 12.72 | 13.68 | 1.85 | 3.62 | 12.2 | 13.15 | 27.5 | 13.06 | 3.06  | 19.34  |
| 70508 | 'Bbx'           | 9.47  | 10.95 | 11.2 | 11.9 | 5.57 | 3.25  | 13.2 | 5.51  | 10.13 | 18.54  |
| 70510 | 'Rnf167'        | 84.17 | 78.92 | 117  | 79.7 | 80.2 | 113.2 | 127  | 89.82 | 98.4  | 88.07  |
| 70511 | 'Eef2kmt'       | 1.64  | 2.93  | 2.11 | 0    | 6.24 | 0.05  | 0.93 | 4.74  | 5.52  | 3.28   |
| 70527 | 'Stambp'        | 41.84 | 44.66 | 47   | 45.6 | 31.7 | 39.15 | 37.2 | 49.52 | 47.52 | 41.82  |
| 70530 | 'Lrln2'         | 5.31  | 4.27  | 11.7 | 0.79 | 3.59 | 2.59  | 3.96 | 9.57  | 8.67  | 0      |
| 70533 | 'Btf3l4'        | 41.75 | 35.04 | 34.2 | 14.1 | 37.8 | 37.76 | 26.1 | 50    | 27.6  | 40.74  |
| 70536 | 'Qpct'          | 34.55 | 74.46 | 44.9 | 48.1 | 31.6 | 50.48 | 33.3 | 47.83 | 57.19 | 69.48  |
| 70544 | 'Tmem242'       | 118.2 | 55.34 | 99.8 | 145  | 98.8 | 134.4 | 93.2 | 112.9 | 112.7 | 103.15 |
| 70546 | 'Zdhhc2'        | 9.58  | 4.71  | 5.41 | 15.2 | 11.2 | 6.06  | 6.57 | 6.9   | 5.45  | 5.54   |
| 70549 | 'Tln2'          | 4.19  | 3.82  | 3.32 | 1.3  | 2.84 | 4.38  | 5.11 | 3     | 2.52  | 3.14   |
| 70551 | 'Tmtc4'         | 4.68  | 4.68  | 8.44 | 1.43 | 4.49 | 1.49  | 6.85 | 7.56  | 5.44  | 5.8    |
| 70552 | 'Lrrc56'        | 8.35  | 0.71  | 1.71 | 2.37 | 6.39 | 0.02  | 0    | 2.09  | 0     | 3.11   |
| 70556 | 'Slc25a33'      | 3.56  | 16.78 | 4.48 | 2.56 | 5.42 | 6.67  | 7.33 | 2.04  | 13.9  | 0.07   |
| 70560 | 'Wars2'         | 1.89  | 1.72  | 0.03 | 0.05 | 3.07 | 5.9   | 0    | 3.1   | 0.93  | 3.36   |
| 70561 | 'Txndc16'       | 18.57 | 24.15 | 24.7 | 29.6 | 11.6 | 16.98 | 24   | 19.73 | 25.55 | 21.01  |
| 70564 | 'Fam213a'       | 155   | 113.2 | 110  | 141  | 125  | 151.7 | 106  | 121.3 | 142.8 | 132.58 |
| 70567 | 'Fra10ac1'      | 30.64 | 19.55 | 33.6 | 17   | 24.5 | 20.49 | 26.7 | 16.17 | 24.89 | 8.87   |
| 70568 | 'Cpne3'         | 1.53  | 2.04  | 4.54 | 0    | 3.23 | 0.8   | 0.49 | 1.29  | 2     | 1.35   |
| 70571 | 'Tcerg1l'       | 1.93  | 9.76  | 1.88 | 18.3 | 1.52 | 3.18  | 6.12 | 6.56  | 0     | 2.08   |
| 70572 | 'Ipo5'          | 19.32 | 25.41 | 23.5 | 41.5 | 14   | 5.94  | 9.84 | 18.18 | 6.87  | 15.1   |
| 70573 | 'Tbccd1'        | 5.13  | 14.42 | 5.97 | 2.95 | 4.7  | 7.71  | 5.92 | 2.4   | 12.03 | 5.82   |
| 70574 | 'Cpm'           | 0.34  | 0.28  | 2.22 | 1.43 | 1.07 | 2.36  | 0    | 0.76  | 0.12  | 1.07   |
| 70575 | 'Gfod2'         | 45.55 | 39.33 | 27   | 9.81 | 38.5 | 24.81 | 23.2 | 39.93 | 42.54 | 23.35  |
| 70579 | 'Zc3h11a'       | 31.87 | 24.86 | 19.7 | 26   | 23   | 10.51 | 27.8 | 26.6  | 19.36 | 33.7   |

|       |                 |       |       |      |      |      |       |      |       |       |       |
|-------|-----------------|-------|-------|------|------|------|-------|------|-------|-------|-------|
| 70584 | 'Pak4'          | 3.15  | 4.01  | 0.72 | 0    | 1.72 | 2.42  | 0    | 7.66  | 2.44  | 0     |
| 70591 | '5730455P16Rik' | 34.22 | 33.43 | 24.7 | 13.7 | 34.8 | 30.86 | 47.7 | 31.97 | 35.75 | 35.34 |
| 70598 | 'Filip1'        | 0.01  | 1.07  | 0    | 1.96 | 0    | 1.04  | 0.9  | 3.46  | 0     | 0     |
| 70599 | 'Itprid2'       | 0.89  | 0.92  | 0.01 | 5.69 | 0.3  | 2.24  | 0.47 | 1.75  | 1.58  | 1.51  |
| 70601 | 'Ecd'           | 39.91 | 34.85 | 19.8 | 37.6 | 34.2 | 39.37 | 25.7 | 34.89 | 19.05 | 52.11 |
| 70603 | 'Mutyh'         | 3.34  | 1.77  | 0    | 0    | 5.38 | 0     | 0    | 1.4   | 0.58  | 0.25  |
| 70604 | 'Dnajb14'       | 15.62 | 15.23 | 14   | 30.1 | 13.3 | 22.17 | 18.7 | 14.41 | 12.16 | 17.69 |
| 70605 | 'Zdhhc24'       | 18.38 | 6.69  | 7.09 | 0    | 9.79 | 16    | 24.3 | 12.15 | 0.25  | 6.93  |
| 70611 | 'Fbxo33'        | 3.52  | 6.56  | 2.86 | 13.7 | 8.67 | 6.35  | 3.27 | 4.02  | 5.94  | 3.96  |
| 70612 | 'Tmem230'       | 33.99 | 37.7  | 27.4 | 32.8 | 45.5 | 49.31 | 73.5 | 30.65 | 41.74 | 36.53 |
| 70615 | 'Ankrd24'       | 9.35  | 8.44  | 14   | 13.9 | 9.48 | 12.35 | 8.05 | 9.37  | 17.51 | 14.41 |
| 70616 | 'Sugp1'         | 25.41 | 39.33 | 39.6 | 39.2 | 48.6 | 11.6  | 36.9 | 18.24 | 38.81 | 31.62 |
| 70617 | 'Fam241a'       | 0     | 0     | 0    | 0    | 0    | 0     | 0    | 0.81  | 0     | 0     |
| 70620 | 'Ube2v2'        | 47.34 | 45.5  | 47.6 | 45.2 | 35.5 | 47.92 | 45.9 | 50.46 | 47.63 | 51.43 |
| 70625 | 'Med26'         | 3.31  | 11.79 | 4.92 | 14.3 | 3.24 | 4.23  | 8.76 | 2.13  | 7.97  | 3.27  |
| 70638 | 'Fam189a1'      | 0.01  | 0.93  | 6.17 | 2.52 | 2.65 | 0.02  | 0.01 | 0.77  | 6.81  | 2.66  |
| 70640 | 'Dcp2'          | 0.95  | 2.15  | 1.96 | 3.57 | 1.95 | 0.68  | 0.68 | 0.58  | 1.19  | 0.14  |
| 70645 | 'Oip5'          | 0     | 0     | 1.5  | 0    | 0    | 0     | 0    | 0     | 0     | 0     |
| 70646 | 'Naa30'         | 1.09  | 0.47  | 1.03 | 0.32 | 1.06 | 0     | 0.01 | 1.79  | 0.09  | 0.04  |
| 70650 | 'Zcchc8'        | 3.54  | 13.92 | 5.06 | 6.35 | 2.69 | 7.62  | 10.7 | 8.2   | 4.98  | 3.39  |
| 70652 | 'Tmem144'       | 2.14  | 1.99  | 3.58 | 0.03 | 2.64 | 3.42  | 5.44 | 0     | 1.06  | 7.55  |
| 70661 | 'Sik3'          | 3.67  | 3.65  | 3.53 | 5.47 | 3.16 | 6.01  | 2.51 | 3.15  | 2.2   | 0.8   |
| 70673 | 'Prdm16'        | 3.05  | 5.06  | 4.34 | 2.19 | 0.83 | 1.49  | 3.55 | 3.68  | 0.04  | 3.12  |
| 70675 | 'Vcpip1'        | 5.71  | 3.54  | 6.32 | 2.88 | 3.59 | 6.06  | 2.17 | 4.29  | 2.86  | 4.99  |
| 70676 | 'Gulp1'         | 1.22  | 1.42  | 1.19 | 0    | 1.08 | 0     | 0.05 | 1.33  | 3.86  | 2.86  |
| 70681 | 'Abraxas1'      | 4.15  | 3.54  | 2.85 | 5.07 | 2.02 | 7.51  | 0.08 | 5.12  | 4.39  | 5.95  |
| 70683 | 'Utp20'         | 0.34  | 0.95  | 0.5  | 2.48 | 0.32 | 0.02  | 0.69 | 1.35  | 0.5   | 1.18  |
| 70686 | 'Dusp16'        | 0.2   | 0.68  | 5.49 | 3.31 | 0.5  | 0.05  | 2.01 | 1.42  | 1.54  | 4.47  |
| 70691 | '3830403N18Rik' | 0     | 0.44  | 0    | 0.12 | 0    | 0     | 0    | 0.04  | 0     | 0     |
| 70693 | 'Adgra3'        | 1.86  | 1.16  | 2.1  | 4.56 | 0.01 | 0     | 0    | 0.01  | 3.05  | 0.1   |
| 70699 | 'Nup205'        | 4.29  | 1.65  | 1.01 | 13.1 | 3.11 | 4.07  | 5.34 | 0.52  | 1.86  | 1.88  |
| 70713 | 'Gpr137c'       | 4.3   | 2.31  | 8.24 | 0.31 | 3.56 | 3.04  | 3.97 | 5.73  | 1.64  | 1.39  |
| 70717 | 'Medag'         | 7.75  | 10.52 | 0.63 | 0.07 | 2.08 | 1.64  | 11.2 | 5.35  | 4.03  | 8.24  |
| 70719 | 'Arhgap45'      | 1.67  | 0     | 0.02 | 0    | 0    | 0.95  | 0    | 0     | 0     | 0     |
| 70726 | 'Angptl6'       | 12.77 | 19.92 | 15.3 | 14.4 | 20.1 | 8.4   | 12.1 | 13.74 | 13.84 | 27.51 |
| 70727 | 'Rasgef1a'      | 14.43 | 20.02 | 11   | 39.1 | 36.3 | 18.78 | 15.6 | 15.08 | 22.21 | 25.68 |
| 70729 | 'Nos1ap'        | 22.48 | 11.23 | 16.4 | 26.2 | 7.51 | 4.37  | 19   | 4.96  | 5.46  | 1.85  |
| 70730 | '6330409D20Rik' | 0.32  | 0     | 0.22 | 0    | 3.62 | 2.74  | 0    | 1.7   | 0     | 0     |
| 70737 | 'Cgn'           | 10.67 | 8.3   | 14.2 | 18.8 | 8.31 | 8.21  | 5.75 | 9.33  | 21.61 | 12.44 |
| 70747 | 'Tspan2'        | 11.07 | 6.32  | 8.51 | 5.01 | 6.83 | 6.98  | 9.03 | 6.55  | 10.26 | 4.04  |
| 70750 | 'Kdsr'          | 7.28  | 13.91 | 20.6 | 6.04 | 11.1 | 8.12  | 21.1 | 11.76 | 19.99 | 14.21 |
| 70757 | 'Hacd2'         | 9.02  | 5.92  | 4.33 | 17.5 | 4.67 | 1.63  | 6.99 | 4.71  | 5.77  | 0.05  |
| 70762 | 'Dclk2'         | 7.66  | 5.34  | 12.4 | 11.4 | 4.89 | 3.73  | 12.4 | 3.32  | 9.74  | 1.8   |
| 70767 | 'Prpf3'         | 21.75 | 11.64 | 5.47 | 16.4 | 16.2 | 7.34  | 20.2 | 3.1   | 4.68  | 7.24  |
| 70769 | 'Nolc1'         | 28.7  | 22.75 | 27.8 | 38.7 | 27.2 | 26.76 | 37.3 | 20.24 | 26.69 | 23.7  |
| 70771 | 'Gpr173'        | 0.35  | 0     | 0.01 | 0.41 | 1.67 | 0.27  | 2.27 | 0.49  | 0.57  | 2.1   |
| 70772 | 'Ggnbp1'        | 0     | 1.58  | 0    | 10.3 | 0    | 0.35  | 0    | 1.6   | 0     | 0.19  |
| 70779 | 'Prdm5'         | 3.06  | 2.86  | 0.07 | 0    | 0    | 1.23  | 0    | 0.53  | 0.98  | 1.87  |
| 70784 | 'Rasl12'        | 0.22  | 0.07  | 2.29 | 0    | 3.11 | 0     | 0    | 3.22  | 0.02  | 0     |
| 70785 | 'Dennd1c'       | 0     | 0     | 1.9  | 0.02 | 0    | 2.47  | 1    | 0.34  | 0.66  | 0.78  |
| 70788 | 'Klhl30'        | 0     | 0.02  | 0    | 0.02 | 0    | 0.01  | 0    | 0     | 0     | 0.03  |
| 70789 | 'Kynu'          | 2.14  | 0     | 0    | 0    | 0    | 4.43  | 0    | 0     | 0     | 2.6   |
| 70790 | 'Ubr5'          | 5.65  | 4.58  | 1.06 | 15.6 | 4.98 | 2.44  | 2.04 | 2.78  | 1.4   | 5.19  |
| 70791 | 'Hars2'         | 19.67 | 19.44 | 10.7 | 9.54 | 18.4 | 14.26 | 12   | 2.37  | 17.55 | 31.57 |
| 70796 | 'Zdhhc1'        | 26.08 | 24.25 | 38.7 | 30.4 | 15.4 | 16.38 | 31.7 | 7.7   | 23.12 | 11.1  |
| 70797 | 'Ankib1'        | 0.97  | 2.31  | 2.42 | 3    | 3.61 | 1.01  | 2.65 | 0.87  | 5.25  | 0.82  |
| 70799 | 'Cep192'        | 0.11  | 0.67  | 0.42 | 2.25 | 0.89 | 0.01  | 0    | 1.18  | 0.55  | 0.24  |
| 70802 | 'Pwwp2a'        | 5.43  | 3.46  | 5.48 | 9.19 | 6.73 | 2.83  | 4.52 | 2.38  | 3.51  | 5.44  |

|       |                 |       |       |      |      |      |       |      |       |       |        |
|-------|-----------------|-------|-------|------|------|------|-------|------|-------|-------|--------|
| 70804 | 'Pgrmc2'        | 6.52  | 6.92  | 7.19 | 12.3 | 3.46 | 4.88  | 15.4 | 6.78  | 7.22  | 3.91   |
| 70807 | 'Arrdc2'        | 0.17  | 6.07  | 3.05 | 2.14 | 3.83 | 1.95  | 2.19 | 5.09  | 1.9   | 3.75   |
| 70810 | 'Krt25'         | 0.03  | 0.68  | 0.08 | 0    | 5.32 | 7.63  | 0    | 1.37  | 0     | 0      |
| 70821 | '4921507P07Rik' | 2.74  | 0.03  | 0.79 | 0    | 2.1  | 1.83  | 5.27 | 0     | 0.07  | 2.6    |
| 70823 | 'Hmgxb4'        | 1     | 2.07  | 2.29 | 3.24 | 5.69 | 3.26  | 1.3  | 4.33  | 4.13  | 1.44   |
| 70827 | 'Trak2'         | 0.26  | 1.78  | 2.32 | 2.67 | 9.78 | 0.03  | 0.85 | 1.33  | 0.7   | 1.84   |
| 70829 | 'Ccadc93'       | 2.29  | 2.69  | 2.03 | 1.74 | 0.01 | 0.06  | 1.26 | 0.67  | 1.08  | 0.67   |
| 70834 | 'Spag9'         | 14.39 | 15.34 | 14.7 | 15.1 | 14.5 | 11.06 | 6.28 | 10.44 | 10.85 | 9.88   |
| 70835 | 'Prss22'        | 0     | 0     | 0    | 0    | 0    | 0     | 0    | 0     | 0.1   | 0      |
| 70839 | 'P2ry12'        | 8.57  | 6.89  | 0.38 | 18.9 | 9.39 | 31.74 | 0    | 6.14  | 0     | 0      |
| 70843 | 'Krt28'         | 0     | 0     | 0    | 0    | 0    | 0     | 0    | 0     | 0.5   | 0      |
| 70853 | 'Vwa3b'         | 0.38  | 2.77  | 0.72 | 1.93 | 0    | 1.14  | 1.47 | 0.06  | 0.3   | 2.17   |
| 70859 | 'Lrrc63'        | 0     | 0.05  | 0    | 0    | 0.13 | 0     | 0    | 0.04  | 0.02  | 0      |
| 70866 | 'Slco6d1'       | 0     | 0     | 0    | 0    | 0    | 0     | 0    | 0     | 0     | 1.35   |
| 70873 | 'Cnbd2'         | 8.31  | 5.41  | 9.76 | 5.55 | 5.62 | 14.05 | 3.16 | 4.4   | 5.11  | 12.36  |
| 70881 | 'Nt5c1b'        | 0     | 0.29  | 0    | 0    | 0.27 | 0     | 0    | 0     | 0     | 0      |
| 70882 | 'Armc3'         | 0     | 0     | 1.5  | 0.02 | 0    | 0     | 0    | 2.31  | 0     | 1.24   |
| 70884 | 'Ccadc81'       | 2.61  | 0.14  | 0.09 | 0.13 | 0    | 0     | 0    | 0.09  | 1.73  | 0.02   |
| 70885 | 'Ints10'        | 19.81 | 20.53 | 24.5 | 13.7 | 9.01 | 9.35  | 11   | 10.1  | 17.81 | 20.46  |
| 70887 | 'Dmrtc1a'       | 39.7  | 61.21 | 39.4 | 54.4 | 15.2 | 21.3  | 7.62 | 32.95 | 15.87 | 15.43  |
| 70891 | 'Spdya'         | 4.47  | 6.13  | 14.9 | 13.5 | 5.54 | 22.42 | 6.99 | 1.33  | 6.39  | 3.05   |
| 70892 | 'Tll7'          | 11.05 | 5.99  | 8.96 | 8.96 | 20.1 | 23.26 | 11.5 | 7.13  | 13.67 | 7.8    |
| 70894 | 'Efcab3'        | 0     | 0     | 0    | 0    | 0    | 0     | 0    | 0     | 0     | 0.15   |
| 70896 | 'Speer1'        | 0     | 0     | 0.04 | 0    | 0    | 0     | 0.63 | 0     | 0     | 0      |
| 70897 | 'Fam71d'        | 0.02  | 0.18  | 0.12 | 0.08 | 0    | 0.04  | 0    | 0.86  | 0.04  | 0.12   |
| 70900 | '4921517D22Rik' | 0     | 0.03  | 0    | 0    | 0.02 | 0.01  | 0    | 0     | 0     | 0      |
| 70901 | '4921524L21Rik' | 0.18  | 0.26  | 0.22 | 0.41 | 0.1  | 0.2   | 0.29 | 0.09  | 0.04  | 0.12   |
| 70909 | '4921504E06Rik' | 0     | 0.05  | 0    | 0    | 0    | 0     | 0    | 0     | 0     | 0      |
| 70911 | 'Phyhip1'       | 308.8 | 377.8 | 221  | 396  | 210  | 278.3 | 311  | 357.6 | 199.8 | 145.66 |
| 70918 | 'Nsun7'         | 0.45  | 2.32  | 1.68 | 9.02 | 6.36 | 4.09  | 1.8  | 2.46  | 4.7   | 6.86   |
| 70920 | 'Tex47'         | 0.02  | 0     | 0.05 | 0    | 0    | 0.23  | 0    | 0     | 0     | 0      |
| 70925 | 'Cdkn2aip'      | 6.74  | 12.25 | 6.81 | 31   | 3.66 | 1.55  | 3.32 | 8.46  | 7.42  | 8.8    |
| 70930 | 'Nol8'          | 3.56  | 5.14  | 1.28 | 2.16 | 0.87 | 4.47  | 3.16 | 3.35  | 2.09  | 4.53   |
| 70945 | 'Mmrrn1'        | 0     | 0.35  | 0    | 0    | 0    | 0     | 0    | 0     | 0     | 0      |
| 70948 | 'Wdr20rt'       | 0     | 0     | 0.02 | 0    | 0    | 0     | 0    | 0     | 0     | 0      |
| 70951 | 'Spata1'        | 0     | 0.03  | 0    | 0    | 2.5  | 0     | 0.6  | 0     | 4.23  | 1.45   |
| 70967 | 'Eva1c'         | 0     | 2.65  | 5.82 | 0.7  | 0    | 0     | 0.04 | 1.31  | 0     | 0      |
| 70974 | 'Pgm2l1'        | 5.09  | 7.22  | 4.83 | 4.97 | 6.5  | 15.01 | 6.46 | 4.02  | 2.94  | 3.08   |
| 70976 | 'Ccadc105'      | 0     | 0.34  | 1.61 | 0    | 0.17 | 0.03  | 0.06 | 0.12  | 0     | 0.52   |
| 70981 | '4931423N10Rik' | 0     | 0.23  | 0    | 4.53 | 0    | 0     | 0.27 | 0.01  | 0     | 0.02   |
| 70984 | '4931406C07Rik' | 5.45  | 2.15  | 4.68 | 3.8  | 2.89 | 9.66  | 3.11 | 0.39  | 3.98  | 3.31   |
| 70989 | 'Jhy'           | 0     | 0     | 0    | 0    | 3.45 | 0     | 0    | 0     | 0     | 0      |
| 70997 | 'Spef1'         | 0     | 1.78  | 1.76 | 5.55 | 3.32 | 0     | 4.52 | 5     | 0     | 5.01   |
| 70998 | 'Phf6'          | 6.52  | 7.61  | 6.68 | 4.42 | 4.86 | 2.93  | 0.93 | 6.2   | 9.15  | 4.72   |
| 70999 | 'Naa40'         | 8.88  | 3.37  | 4.66 | 7.23 | 8.98 | 2.09  | 4.77 | 3.49  | 7.18  | 8.76   |
| 71003 | 'Prss41'        | 0     | 3.27  | 0    | 0    | 0    | 0     | 0    | 0     | 0     | 1      |
| 71007 | 'D7Ert443e'     | 0.03  | 0     | 0    | 0    | 1.48 | 3.19  | 0    | 1.65  | 0     | 0      |
| 71020 | 'Spats1'        | 4.18  | 3.97  | 0    | 8.84 | 3.24 | 1.49  | 0    | 2.65  | 0.53  | 3.97   |
| 71030 | '4933403O08Rik' | 0.39  | 0.15  | 0.21 | 1.02 | 0    | 0     | 0    | 1.2   | 0     | 1.4    |
| 71041 | 'Pcgf6'         | 5.83  | 2.2   | 4.84 | 23   | 5.47 | 3.13  | 2.35 | 5.46  | 4.65  | 3.23   |
| 71046 | '4933405L10Rik' | 3.25  | 0     | 0.53 | 0    | 4.27 | 0     | 0    | 1.28  | 0.3   | 0      |
| 71059 | 'Hexim2'        | 43.13 | 55.7  | 26.7 | 10.7 | 23.1 | 12.24 | 73.9 | 56.28 | 26.09 | 46.62  |
| 71063 | 'Zfp597'        | 0.67  | 0.04  | 0.25 | 4.23 | 0.61 | 0.16  | 2.63 | 1.19  | 2.33  | 2.7    |
| 71069 | 'Stox2'         | 3.8   | 2.37  | 3.29 | 0.9  | 2.65 | 2.36  | 1.2  | 2.5   | 1.69  | 1.64   |
| 71085 | 'Arhgap19'      | 0.82  | 0.09  | 4.05 | 0    | 1.05 | 0.06  | 0.07 | 1     | 0.26  | 0      |
| 71089 | 'Sept12'        | 0     | 0     | 0.65 | 0    | 0    | 0     | 0    | 0     | 0     | 0      |
| 71091 | 'Cdkl1'         | 12.73 | 12.64 | 9.54 | 10.9 | 17.2 | 17.46 | 4.56 | 13.57 | 5.06  | 22.35  |
| 71093 | 'Atoh8'         | 0     | 0     | 0    | 0    | 2.31 | 0     | 0    | 0     | 0     | 0      |

|       |                 |       |       |      |      |      |       |      |       |       |       |
|-------|-----------------|-------|-------|------|------|------|-------|------|-------|-------|-------|
| 71096 | 'Sntg1'         | 5.06  | 13.69 | 15.4 | 6.03 | 8.98 | 5.48  | 9.33 | 3.6   | 5.81  | 8.69  |
| 71099 | 'Tssk4'         | 0.33  | 0     | 0.56 | 0    | 0    | 0     | 0    | 0     | 0     | 0.21  |
| 71101 | 'Uvssa'         | 2.98  | 3.2   | 3.07 | 1.85 | 4.01 | 2.44  | 1.44 | 2.42  | 4.35  | 1.86  |
| 71111 | 'Gpr39'         | 3.76  | 15.92 | 25.2 | 5.11 | 3.42 | 7.95  | 22.3 | 13.61 | 21.15 | 11.53 |
| 71116 | 'Stx18'         | 35.9  | 38.68 | 47.4 | 37.7 | 19.4 | 14.78 | 31.3 | 20.07 | 27.75 | 40.36 |
| 71130 | 'Sh2d6'         | 4.84  | 1.66  | 0    | 0    | 3.31 | 9.48  | 3.28 | 0     | 0     | 0     |
| 71131 | 'Zfp689'        | 5.35  | 5.29  | 4    | 11.5 | 2.73 | 0.01  | 7.68 | 5.36  | 0.03  | 12.88 |
| 71132 | 'Cabyr'         | 0.82  | 2.53  | 2.65 | 7.05 | 2.43 | 0     | 0    | 1.41  | 3.63  | 1.04  |
| 71137 | 'Rfx4'          | 1.81  | 4.4   | 3.01 | 1.09 | 0.43 | 0.09  | 0.02 | 0.57  | 0.27  | 1     |
| 71145 | 'Scara5'        | 0     | 3.77  | 0    | 0    | 0.13 | 2.3   | 0    | 0     | 0.05  | 0     |
| 71146 | 'Golga7b'       | 23.49 | 24.6  | 71.6 | 83.6 | 34.6 | 23.11 | 20.9 | 36.13 | 71.83 | 44.9  |
| 71147 | 'Oxsm'          | 1.45  | 0.87  | 0.9  | 0.02 | 0.34 | 0.01  | 0.01 | 3.42  | 4.49  | 4.19  |
| 71148 | 'Mier1'         | 5.74  | 4.21  | 3.74 | 9.22 | 2.95 | 5.56  | 3.6  | 2.02  | 3.29  | 0.88  |
| 71149 | 'Tex52'         | 3.21  | 0     | 0    | 0    | 2.55 | 0     | 0    | 0     | 0     | 1.37  |
| 71151 | 'Eri2'          | 1.56  | 2.09  | 0.64 | 0    | 2.78 | 2.1   | 2.45 | 0.96  | 6.9   | 2.7   |
| 71156 | 'Lrrc72'        | 0     | 0     | 0.08 | 0    | 0    | 0.15  | 0    | 0     | 0     | 0     |
| 71159 | '4933416I08Rik' | 0     | 0     | 1.94 | 0    | 0    | 0     | 0    | 1.01  | 0     | 0     |
| 71163 | 'Zfp626'        | 1.02  | 1.79  | 0.08 | 2.25 | 2.69 | 0.04  | 1.56 | 0.31  | 0.56  | 0.28  |
| 71164 | 'Zdhhc11'       | 0     | 0     | 0.03 | 0    | 0    | 0     | 0    | 0     | 0     | 0     |
| 71169 | 'Nbas'          | 1.67  | 0.93  | 3.95 | 0.05 | 3.37 | 2.35  | 0.4  | 2.06  | 1.21  | 3.25  |
| 71175 | 'Nipbl'         | 4.37  | 3.48  | 2.31 | 4.55 | 2.91 | 1.53  | 4.89 | 1.61  | 4.6   | 2.42  |
| 71176 | 'Fbxo24'        | 0     | 0     | 0    | 0    | 0.28 | 0     | 0    | 0.79  | 0     | 0.6   |
| 71177 | 'Ints13'        | 15.71 | 10.96 | 14.1 | 16.1 | 4.66 | 20.48 | 13.1 | 10.72 | 12.3  | 8.2   |
| 71198 | 'Otud1'         | 0.42  | 0.28  | 2.08 | 0.29 | 0    | 0     | 0    | 1.31  | 0     | 0.05  |
| 71200 | 'Dydc2'         | 3.8   | 0     | 2.37 | 0.07 | 8.38 | 13.78 | 5.85 | 0     | 1.7   | 3.3   |
| 71206 | 'Katnal2'       | 11.78 | 9.26  | 13.1 | 8.81 | 9.22 | 7.41  | 11.9 | 9.43  | 6.12  | 13.96 |
| 71207 | 'Nudt4'         | 7.74  | 3.45  | 16.6 | 4.21 | 10.8 | 2.61  | 10.1 | 2.06  | 3.63  | 3.67  |
| 71213 | 'Cage1'         | 3.27  | 1.71  | 0.39 | 5.26 | 1.09 | 2.85  | 0    | 1.68  | 2.87  | 0.22  |
| 71227 | 'Daw1'          | 0     | 0     | 0    | 0    | 0    | 0     | 0    | 2.13  | 0     | 0.67  |
| 71228 | 'Dlg5'          | 2.48  | 1.1   | 2.72 | 1.14 | 2.89 | 0.65  | 0.03 | 0.16  | 5.29  | 0.6   |
| 71233 | 'Enkur'         | 7.62  | 10.01 | 0    | 16.8 | 1.3  | 24.54 | 0    | 3.4   | 6.28  | 7.52  |
| 71236 | 'Rsph14'        | 0     | 5.04  | 2.16 | 1.73 | 4.85 | 0     | 0    | 1.52  | 1.71  | 1.57  |
| 71238 | 'Sdhaf3'        | 25.14 | 18.47 | 24.3 | 24.8 | 34   | 30.42 | 20.1 | 22.22 | 17.25 | 29.81 |
| 71240 | 'Osbsp17'       | 1.66  | 7.11  | 1.67 | 0    | 4.11 | 3.8   | 3.79 | 3.23  | 2.55  | 0     |
| 71242 | 'Spata24'       | 0     | 12.63 | 3.36 | 19.4 | 3.22 | 11.14 | 6.68 | 12.41 | 2.87  | 9.65  |
| 71254 | 'Naif1'         | 1.03  | 1.59  | 1.09 | 0    | 2.81 | 1.16  | 3.36 | 1.21  | 2.64  | 3.21  |
| 71263 | 'Mro'           | 2.61  | 3.65  | 1.31 | 6.86 | 4.11 | 6.85  | 4.36 | 3.93  | 0.84  | 0.02  |
| 71268 | 'Lrrfip2'       | 16.74 | 10.37 | 18.4 | 25.8 | 5.26 | 1.9   | 11.8 | 2.81  | 12.21 | 2.78  |
| 71275 | 'Noxred1'       | 0     | 0     | 0    | 0    | 0.35 | 0     | 0.11 | 0     | 0     | 0     |
| 71276 | 'Ccadc57'       | 3.9   | 8.87  | 1.84 | 12.2 | 0.51 | 2.24  | 1.36 | 8.23  | 3.38  | 8.78  |
| 71279 | 'Slc29a3'       | 2.45  | 0.22  | 0.07 | 0    | 1.05 | 2.54  | 0.05 | 0.13  | 0.96  | 3.36  |
| 71281 | 'Apobec4'       | 0     | 0     | 0.71 | 0    | 0.13 | 0     | 0.03 | 0     | 0     | 0.03  |
| 71287 | 'Cpvl'          | 0     | 0     | 1.87 | 0    | 0    | 0     | 0    | 0     | 0     | 0     |
| 71302 | 'Arhgap26'      | 17.78 | 14.47 | 21.7 | 22.7 | 20.7 | 7.74  | 26.8 | 21.85 | 25.99 | 18.7  |
| 71306 | 'Mfap3l'        | 0.88  | 0.1   | 1.66 | 0    | 0.59 | 1.96  | 0    | 0.85  | 1.81  | 0.01  |
| 71310 | 'Tbc1d9'        | 4.45  | 6.01  | 0.97 | 4.97 | 3.2  | 3.79  | 5.02 | 3.11  | 5.76  | 4.51  |
| 71313 | 'Fsip1'         | 2.52  | 0     | 0.03 | 0.1  | 0    | 3.86  | 0    | 2.45  | 2.95  | 1.35  |
| 71323 | 'Rassf8'        | 1.67  | 2.21  | 3.1  | 0.91 | 3.37 | 2.58  | 10.2 | 1.74  | 3.22  | 2.07  |
| 71330 | 'Rcbtb1'        | 10.62 | 7.44  | 5.35 | 12.8 | 5.74 | 5.61  | 0    | 6.3   | 13.29 | 6.93  |
| 71336 | 'Rbks'          | 0.05  | 0.05  | 4.25 | 19.6 | 9.18 | 7.59  | 1.21 | 2.79  | 0.72  | 0     |
| 71338 | 'Tprg'          | 0     | 0     | 0    | 0    | 0    | 0     | 0    | 1.03  | 0     | 0     |
| 71340 | 'Riok1'         | 11.34 | 7.08  | 13.5 | 13   | 7.51 | 23.7  | 4.72 | 6.26  | 9.92  | 5.07  |
| 71354 | 'Wdr31'         | 40.5  | 28.44 | 40   | 48.2 | 57.4 | 40    | 27.8 | 36.63 | 48.93 | 42.36 |
| 71355 | 'Col24a1'       | 0     | 0     | 1.2  | 0    | 0    | 0     | 0    | 0     | 0     | 0     |
| 71361 | 'Aifm2'         | 13.64 | 9.72  | 4.61 | 0.04 | 7.39 | 7.33  | 11.5 | 8.06  | 12.62 | 7.87  |
| 71365 | 'Pdss2'         | 12.64 | 12.23 | 6.78 | 30.7 | 20.8 | 19.22 | 5.7  | 2.8   | 7.29  | 5.72  |
| 71367 | 'Chst9'         | 0     | 0     | 3.01 | 0    | 0    | 0     | 0    | 0     | 0     | 0     |
| 71371 | 'Arid5b'        | 9.42  | 4.65  | 4.05 | 8.69 | 8.58 | 4.02  | 5.69 | 3.36  | 5.16  | 1.2   |

|       |                 |       |       |      |      |      |       |      |       |       |        |
|-------|-----------------|-------|-------|------|------|------|-------|------|-------|-------|--------|
| 71373 | 'Prr16'         | 3.64  | 0     | 1.49 | 0    | 0    | 5.43  | 0    | 0     | 0     | 1.19   |
| 71375 | 'Foxn3'         | 3.45  | 5.32  | 8.51 | 3.26 | 2.83 | 6.01  | 8.72 | 1.84  | 4.4   | 1.59   |
| 71382 | 'Pex1'          | 7.62  | 6.6   | 4.71 | 4.02 | 6.65 | 8.56  | 2.78 | 5.36  | 14.3  | 6.12   |
| 71386 | 'Krtap28-13'    | 0     | 0     | 2.76 | 0    | 0    | 0     | 0    | 0     | 0     | 1.79   |
| 71389 | 'Chd6'          | 4.99  | 4.66  | 5.48 | 4.97 | 5.44 | 5.18  | 5.63 | 6.87  | 3.15  | 5.07   |
| 71393 | 'Kctd6'         | 4.27  | 0.89  | 2.12 | 2.67 | 0    | 0.03  | 6.75 | 4.59  | 3.62  | 7.92   |
| 71395 | '5430419D17Rik' | 0     | 0.34  | 0    | 0    | 0    | 0     | 0    | 0     | 0     | 0      |
| 71398 | '5430427O19Rik' | 0     | 0     | 0    | 0.04 | 0    | 0     | 0    | 0     | 0.01  | 0.01   |
| 71405 | 'Fam83c'        | 0     | 0.02  | 0    | 0    | 0    | 0     | 0    | 0     | 0     | 0      |
| 71409 | 'Fmnl2'         | 0.52  | 1.5   | 1.72 | 0.33 | 0.67 | 1.82  | 0    | 1.7   | 0.28  | 2      |
| 71412 | 'Dhrs2'         | 0.04  | 0.26  | 0    | 0    | 10.7 | 0     | 0    | 0     | 0     | 0      |
| 71435 | 'Arhgap21'      | 3.93  | 3.37  | 4.24 | 6.78 | 2.58 | 3.4   | 5.23 | 4.09  | 4.94  | 5.44   |
| 71436 | 'Flrt3'         | 23.28 | 9.33  | 23.7 | 12.8 | 7.83 | 23.39 | 32.1 | 23.72 | 12.1  | 24.34  |
| 71446 | 'Wrb'           | 147.7 | 184.6 | 171  | 72.8 | 160  | 174.7 | 176  | 201   | 240   | 214.21 |
| 71448 | 'Tmem80'        | 36.3  | 35.81 | 14.7 | 11.6 | 21   | 42.57 | 21.7 | 20.5  | 10.76 | 31.72  |
| 71449 | 'Mettl13'       | 6.54  | 5.02  | 0.02 | 11   | 3.87 | 0.37  | 7.81 | 4.33  | 3.53  | 2.33   |
| 71452 | 'Ankrd40'       | 3.15  | 6.96  | 4.62 | 3.76 | 11.8 | 4.22  | 4.51 | 11.99 | 4.9   | 1.49   |
| 71458 | 'Bcor'          | 0.59  | 1.59  | 0.03 | 0.06 | 0.13 | 0.01  | 0.01 | 0.71  | 0.05  | 0.57   |
| 71461 | 'Ptk7'          | 0.97  | 0.66  | 3.43 | 1.36 | 3.49 | 1.2   | 2.2  | 5.22  | 4.24  | 3.45   |
| 71472 | 'Usp19'         | 10.98 | 15.33 | 19.4 | 14   | 12.3 | 5.43  | 14   | 14.66 | 14.08 | 9.77   |
| 71474 | 'Ppp6r2'        | 21.2  | 22.08 | 28.5 | 38.3 | 30.9 | 9.71  | 17.8 | 16.58 | 40.3  | 29.89  |
| 71481 | 'Alpk1'         | 0     | 0     | 0    | 0    | 0.07 | 0     | 0.92 | 0     | 0     | 0      |
| 71492 | 'Bbs7'          | 7.52  | 22.02 | 12.9 | 43.3 | 16.8 | 8.83  | 9.58 | 21.87 | 14.21 | 19.75  |
| 71508 | 'Zfp935'        | 3.43  | 7.35  | 4.87 | 15.3 | 7.02 | 2.08  | 4.21 | 1.95  | 13.35 | 3.3    |
| 71514 | 'Sfpq'          | 11.71 | 10.83 | 6.99 | 20.3 | 15.7 | 7.11  | 7.8  | 6.64  | 9.16  | 10.36  |
| 71517 | 'Vsp35l'        | 32.73 | 31.05 | 31.4 | 44.7 | 42.9 | 28.99 | 28.4 | 43.46 | 26.58 | 41.98  |
| 71519 | 'Cyp2u1'        | 3.78  | 2.88  | 6.26 | 0    | 6.01 | 8.09  | 2.25 | 3.12  | 0.03  | 4.56   |
| 71520 | 'Grap'          | 0     | 3.16  | 0    | 0    | 4.07 | 0     | 0    | 0     | 0     | 3.8    |
| 71521 | 'Pds5a'         | 0.64  | 0.21  | 1.34 | 6.79 | 2.01 | 6.06  | 1.86 | 1.96  | 0.99  | 0.76   |
| 71529 | 'Kazn'          | 9.53  | 3.54  | 4.76 | 2.55 | 10.3 | 6     | 2.02 | 7.1   | 10.23 | 3.7    |
| 71532 | 'Fam217b'       | 8.21  | 8.49  | 4.17 | 0    | 10.4 | 1.72  | 13   | 6.23  | 7.76  | 1.14   |
| 71538 | 'Fbxo9'         | 107.9 | 104.7 | 119  | 65.9 | 86.5 | 88.3  | 93.8 | 60.11 | 84.69 | 27.75  |
| 71544 | 'Arhgap42'      | 0.18  | 0.43  | 1.81 | 0    | 0.13 | 0     | 0.45 | 2.72  | 0     | 0      |
| 71562 | 'Afmid'         | 2.24  | 5.21  | 8.47 | 11   | 7.17 | 9.63  | 12.3 | 0.74  | 19.55 | 4.35   |
| 71564 | 'Izumo4'        | 92.76 | 101.8 | 114  | 107  | 130  | 168.8 | 137  | 109.3 | 155   | 193.32 |
| 71566 | 'Clmp'          | 12.66 | 11.65 | 3.34 | 9.01 | 2.88 | 1.83  | 0.02 | 2.74  | 5.1   | 7.09   |
| 71567 | 'Mcm9'          | 1.36  | 0.17  | 0    | 0.63 | 0.08 | 0     | 0    | 0.04  | 0.04  | 0.09   |
| 71583 | '9130008F23Rik' | 0     | 0     | 0.45 | 0    | 0    | 0     | 0    | 0     | 0     | 0      |
| 71584 | 'Gdprd2'        | 29.84 | 87.16 | 14   | 7.42 | 60.3 | 32.3  | 40.6 | 31.87 | 47.55 | 65.27  |
| 71586 | 'Ifih1'         | 0     | 2.05  | 1.66 | 0.28 | 0.03 | 0     | 0    | 0.61  | 2.29  | 3.28   |
| 71591 | 'Zfp251'        | 21.69 | 3.87  | 8.13 | 5.58 | 9.07 | 3.55  | 9.19 | 7.47  | 13.23 | 15.58  |
| 71592 | 'Pogk'          | 1.91  | 1.16  | 4.28 | 0    | 2.36 | 2.05  | 0.27 | 0.88  | 1.41  | 2.96   |
| 71599 | 'Senp8'         | 6.46  | 11.21 | 6.09 | 4.57 | 1.76 | 5.05  | 5.23 | 5.56  | 7.27  | 3.38   |
| 71602 | 'Myo1e'         | 1.03  | 0.14  | 0.33 | 0.22 | 0.17 | 0.3   | 0.09 | 0.06  | 0.17  | 0.08   |
| 71607 | 'Snx20'         | 0.84  | 0.59  | 0    | 0    | 2.47 | 0.55  | 0.5  | 0.31  | 2.52  | 0.51   |
| 71609 | 'Tradd'         | 0     | 2.29  | 2.22 | 0    | 11.5 | 0.54  | 5.33 | 6.69  | 2.46  | 3.26   |
| 71617 | 'Armh3'         | 4.88  | 9.98  | 9.41 | 7.11 | 14.2 | 6.01  | 7.54 | 6.29  | 11.31 | 10.23  |
| 71640 | 'Zfp949'        | 7.87  | 2.14  | 17.9 | 0.24 | 12.8 | 8.03  | 6.69 | 3.52  | 4.69  | 10.31  |
| 71643 | 'Zgrf1'         | 0     | 0.86  | 0.01 | 0    | 0    | 0.09  | 1    | 0     | 0.49  | 0.34   |
| 71648 | 'Optn'          | 15.31 | 15.83 | 12.6 | 6.82 | 25.8 | 35.36 | 17.9 | 22.44 | 4.61  | 30.86  |
| 71653 | 'Shtn1'         | 4.47  | 2.8   | 8.52 | 1.24 | 9.75 | 3.6   | 1.34 | 7.08  | 4.62  | 4.83   |
| 71660 | 'Rarres2'       | 1.4   | 7.23  | 7.93 | 0.09 | 18   | 0     | 0    | 30.14 | 4.05  | 6.78   |
| 71665 | 'Fuca1'         | 36.79 | 59.21 | 59.6 | 51.6 | 35.9 | 37.36 | 58.6 | 31.34 | 76.11 | 67.64  |
| 71667 | 'Tmem248'       | 9.23  | 9.3   | 13.1 | 26.8 | 13.3 | 2.15  | 15.6 | 4.38  | 11.13 | 8.58   |
| 71670 | 'Acy3'          | 0     | 3.2   | 0    | 0    | 0.05 | 0     | 8.02 | 2.78  | 5.19  | 0      |
| 71673 | 'Rnf215'        | 4.69  | 10.64 | 6.92 | 0.19 | 10   | 7.16  | 11.6 | 10.68 | 20.45 | 6.3    |
| 71675 | '0610010F05Rik' | 17.98 | 6.86  | 7.24 | 20.3 | 10.3 | 2.91  | 9.52 | 2.67  | 13.76 | 7.47   |
| 71678 | 'Brox'          | 27.42 | 20.8  | 14.1 | 29.5 | 31.3 | 4.38  | 18.9 | 21.94 | 26.63 | 26.29  |

|       |                 |       |       |      |      |      |       |      |       |       |        |
|-------|-----------------|-------|-------|------|------|------|-------|------|-------|-------|--------|
| 71679 | 'Atp5h'         | 885   | 705.9 | 914  | 801  | 938  | 999.5 | 836  | 816.5 | 781.6 | 910.3  |
| 71682 | 'Wdr27'         | 0.09  | 0.05  | 0    | 0    | 1.93 | 0     | 0.04 | 0     | 0     | 0.83   |
| 71683 | 'Gypc'          | 0.02  | 0     | 0    | 0    | 0    | 0     | 0    | 0     | 0.02  | 0      |
| 71684 | 'Rbm43'         | 8.06  | 17.78 | 20.5 | 16.5 | 17.9 | 18.19 | 11.4 | 23.83 | 25.15 | 7.19   |
| 71685 | 'Galnt14'       | 42.96 | 19.49 | 5.62 | 46.7 | 0    | 1.45  | 0.03 | 63.78 | 13.14 | 1.74   |
| 71687 | 'Tmem25'        | 49.07 | 50.92 | 46.4 | 10.1 | 66.4 | 56.48 | 63.6 | 80.17 | 68.44 | 60.8   |
| 71690 | 'Esm1'          | 0.4   | 0     | 0.09 | 5.53 | 0    | 0     | 0    | 0.19  | 0     | 0.81   |
| 71691 | 'Pnmal1'        | 194.4 | 207.3 | 156  | 153  | 241  | 204   | 142  | 162.1 | 190.8 | 257.97 |
| 71693 | 'Colec11'       | 0     | 2.67  | 0    | 0    | 1.07 | 0     | 0    | 0     | 0     | 0      |
| 71699 | 'Slc41a3'       | 6.25  | 18.03 | 22.5 | 9.04 | 7.2  | 0.04  | 0.02 | 26.32 | 27.79 | 30.1   |
| 71701 | 'Pnpt1'         | 9.7   | 12.65 | 13.1 | 37.3 | 7.99 | 4.24  | 16.8 | 18.82 | 12.62 | 26.26  |
| 71702 | 'Cdc5l'         | 23.48 | 37.06 | 28.6 | 43.4 | 24.5 | 38.45 | 44.3 | 31.15 | 26.44 | 36.65  |
| 71703 | 'Armcx3'        | 40.95 | 25.4  | 32   | 16   | 14.6 | 6.81  | 42.7 | 27.33 | 27.03 | 33.08  |
| 71704 | 'Arhgef3'       | 5.07  | 7.27  | 2.78 | 4.76 | 8.33 | 1.01  | 3.36 | 2.24  | 1.89  | 11.77  |
| 71706 | 'Slc46a3'       | 1.32  | 4.47  | 0.34 | 9.49 | 11.7 | 4.25  | 0    | 3.42  | 11.67 | 4.4    |
| 71707 | 'Ubiad1'        | 0.85  | 8.59  | 0    | 2.77 | 1.74 | 14.46 | 0    | 2.69  | 7.84  | 0.01   |
| 71709 | 'Syde1'         | 0     | 0.6   | 0    | 0    | 0.05 | 0     | 0    | 0.26  | 0     | 0.03   |
| 71710 | 'Lrrcc1'        | 1.89  | 6.59  | 9.47 | 1.23 | 4.32 | 3.91  | 3.23 | 3.23  | 7.69  | 4.23   |
| 71711 | 'Mus81'         | 13.09 | 28.43 | 14.7 | 40.3 | 27.1 | 16.41 | 11.7 | 14.87 | 28.7  | 18.74  |
| 71712 | 'Dram1'         | 0.07  | 1.88  | 1.62 | 0    | 4.63 | 0     | 0    | 0.54  | 0     | 1.62   |
| 71713 | 'Cdc40'         | 2.84  | 3.7   | 8.56 | 3.88 | 8.19 | 8.63  | 11   | 6.22  | 3.95  | 4.18   |
| 71715 | 'Dhx35'         | 7.42  | 6.07  | 5.98 | 17.7 | 6.41 | 12.31 | 2.6  | 2.16  | 6.65  | 9.91   |
| 71718 | 'Telo2'         | 4.97  | 14.34 | 5.94 | 21.8 | 8.71 | 6.91  | 7.78 | 6.76  | 9.69  | 13.37  |
| 71720 | 'Osbp13'        | 0.18  | 0     | 0.4  | 0    | 0    | 3.17  | 0    | 0.58  | 0.08  | 2.71   |
| 71721 | 'Fam13c'        | 12.29 | 8.07  | 5.06 | 11   | 6.46 | 2.57  | 18.3 | 9.66  | 9.87  | 4.93   |
| 71722 | 'Cic'           | 3.27  | 2.2   | 2.26 | 1.46 | 4.91 | 2.66  | 2.93 | 0.22  | 4.83  | 1.93   |
| 71723 | 'Dhx34'         | 0     | 7.05  | 0    | 0    | 3.84 | 2.01  | 0    | 0.43  | 7.47  | 5.64   |
| 71724 | 'Aox3'          | 0     | 0     | 0    | 0    | 0    | 0     | 0    | 0     | 0     | 1.66   |
| 71726 | 'Smug1'         | 0.21  | 4.69  | 2.41 | 0    | 4.96 | 3.66  | 4.72 | 1.11  | 0     | 3.66   |
| 71728 | 'Stk11ip'       | 5.11  | 6.86  | 4.65 | 0.1  | 4.46 | 2.08  | 0    | 2.41  | 3.28  | 6.59   |
| 71729 | 'Rgs12'         | 1.24  | 4.69  | 2.3  | 2.96 | 1.89 | 2.23  | 1.06 | 5.05  | 7.26  | 3.77   |
| 71732 | 'Vps11'         | 24.92 | 50.49 | 49.4 | 32.5 | 36.2 | 20.58 | 35.6 | 42    | 46.28 | 54.73  |
| 71733 | 'Susd2'         | 19.85 | 35.77 | 28   | 7.62 | 12.1 | 23.09 | 19.9 | 46.39 | 23.89 | 14.53  |
| 71735 | 'Lrwd1'         | 5.07  | 2.75  | 19.3 | 0    | 1.44 | 6.38  | 16.4 | 7.75  | 0.59  | 7.34   |
| 71738 | 'Mamdc2'        | 0     | 0     | 0.6  | 0.34 | 0    | 0     | 0    | 2.05  | 0     | 0      |
| 71740 | 'Nectin4'       | 0     | 0.69  | 1.73 | 0    | 0    | 0     | 0    | 0.18  | 0.58  | 0      |
| 71742 | 'Ulk3'          | 8.74  | 7.9   | 8.68 | 0.09 | 2.55 | 9.63  | 3.91 | 4.6   | 6.8   | 6.21   |
| 71743 | 'Coasy'         | 46    | 40.11 | 30.4 | 25.8 | 48.8 | 55.17 | 30.9 | 37.16 | 30.43 | 22.9   |
| 71745 | 'Cul2'          | 55    | 53.17 | 44.4 | 23.5 | 48.2 | 28.98 | 55.9 | 56.64 | 68.6  | 35.49  |
| 71746 | 'Rgl3'          | 0     | 2.81  | 0.06 | 0.02 | 0    | 0.02  | 1.4  | 0     | 0     | 0      |
| 71750 | 'R3hdm2'        | 4.03  | 4.2   | 5.55 | 11.1 | 15.6 | 8.93  | 7.44 | 7.15  | 10.17 | 17.3   |
| 71751 | 'Map3k13'       | 2.07  | 0.58  | 2.04 | 0.71 | 0.91 | 1.53  | 3.1  | 0.58  | 0.53  | 2.53   |
| 71752 | 'Gtf3c2'        | 12.78 | 12.78 | 14.3 | 15.4 | 10.4 | 4.18  | 4.79 | 5.79  | 12.12 | 7.43   |
| 71753 | 'Tmprss6'       | 0     | 0.15  | 0    | 0    | 9.54 | 0     | 3.12 | 1.07  | 0     | 2.43   |
| 71754 | 'Cyp2d40'       | 0.24  | 0     | 0    | 0    | 0    | 0     | 0    | 0     | 0     | 0      |
| 71755 | 'Dhdh'          | 0     | 3.31  | 0    | 7.66 | 6.03 | 2.19  | 0    | 0     | 4.08  | 10.53  |
| 71760 | 'Etnppl'        | 11.58 | 7.52  | 5.84 | 5.23 | 1.64 | 15.88 | 0    | 6.81  | 6.59  | 3.93   |
| 71761 | 'Amdhd1'        | 0     | 1.03  | 0    | 0    | 0    | 1.06  | 0    | 0     | 0     | 3.42   |
| 71764 | 'C2cd2l'        | 14.03 | 12.84 | 17.8 | 18.8 | 20.1 | 11.48 | 13.7 | 8.55  | 2.68  | 15.02  |
| 71765 | 'Klhdc3'        | 84.88 | 68.18 | 115  | 51.1 | 62.6 | 102.7 | 128  | 91.43 | 94.76 | 54.78  |
| 71766 | 'Raver1'        | 7.08  | 5.72  | 8.36 | 6    | 8.35 | 4.49  | 6.11 | 6.11  | 8     | 11.82  |
| 71767 | 'Tysnd1'        | 4.15  | 2.58  | 13.8 | 0.03 | 0.02 | 3.62  | 12.4 | 1.77  | 2.77  | 0.26   |
| 71768 | 'Vwce'          | 1.89  | 0     | 0    | 0    | 2.24 | 0.05  | 0    | 0     | 0     | 0.84   |
| 71769 | 'Bbs10'         | 4.68  | 6.24  | 0.02 | 19.3 | 0.05 | 0.03  | 0    | 1.46  | 6.13  | 0      |
| 71770 | 'Ap2b1'         | 21.33 | 11.62 | 43.6 | 7.92 | 29.4 | 7.99  | 18.2 | 16.88 | 49.75 | 32.6   |
| 71772 | 'Plbd2'         | 23.15 | 21.4  | 56.2 | 48.3 | 13.5 | 17.01 | 30.7 | 13.71 | 33.33 | 13.64  |
| 71774 | 'Shroom1'       | 0     | 0     | 2.51 | 4.69 | 2.31 | 0.41  | 0    | 0.13  | 0     | 0      |
| 71775 | '1300017J02Rik' | 0     | 0     | 0    | 0    | 0    | 0     | 0    | 0.12  | 0     | 0      |

|       |                 |       |       |      |      |      |       |      |       |       |        |
|-------|-----------------|-------|-------|------|------|------|-------|------|-------|-------|--------|
| 71776 | 'Tha1'          | 11.33 | 9.76  | 8.02 | 10.9 | 2.45 | 5.45  | 0.03 | 2.73  | 14.64 | 3.13   |
| 71777 | 'Ing3'          | 6.63  | 6.22  | 9.69 | 14.7 | 14.3 | 5.97  | 4.06 | 7.21  | 0.11  | 9.46   |
| 71778 | 'Klhl5'         | 8.15  | 5     | 5.36 | 13.6 | 2.72 | 4.46  | 11.3 | 0.65  | 0.13  | 0.14   |
| 71779 | 'March8'        | 2.8   | 2.8   | 10.3 | 1.58 | 3.5  | 4.02  | 7.93 | 4.11  | 5.61  | 3.46   |
| 71780 | 'Isyna1'        | 84.83 | 108   | 49.1 | 99.2 | 86.5 | 110.9 | 103  | 99.34 | 101.1 | 98.5   |
| 71781 | 'Slc16a14'      | 7.31  | 0     | 5.43 | 0    | 4.63 | 7.19  | 0.02 | 1.71  | 4.37  | 10.12  |
| 71782 | 'Ankle2'        | 5.44  | 3.31  | 4.7  | 2.39 | 2.56 | 1.84  | 0.07 | 3.47  | 3.76  | 1.53   |
| 71785 | 'Pdgfd'         | 0     | 1.19  | 0    | 0    | 6.15 | 0.19  | 4.78 | 1.87  | 0     | 0      |
| 71787 | 'Trnau1ap'      | 55.28 | 38.15 | 40   | 66.6 | 37   | 38.51 | 30.5 | 35.07 | 40.72 | 29.96  |
| 71790 | 'Anxa9'         | 1.74  | 0     | 0    | 0    | 0    | 0.08  | 0    | 0     | 0.47  | 0      |
| 71791 | 'Cpa4'          | 2.42  | 0     | 6.98 | 0    | 0    | 4.83  | 0    | 0.02  | 4.5   | 0      |
| 71793 | 'Ints12'        | 5.32  | 3.87  | 7.51 | 8.58 | 1.41 | 8.54  | 5.65 | 8.03  | 8.31  | 3.96   |
| 71795 | 'Pitpnc1'       | 10.23 | 13.18 | 11.6 | 13.7 | 8.68 | 5.61  | 9.68 | 12    | 9.61  | 5.44   |
| 71799 | 'Ptcd1'         | 17.72 | 14.39 | 18   | 3.53 | 15.4 | 5.67  | 13.3 | 9.96  | 18.86 | 14.5   |
| 71801 | 'Plekhf2'       | 3.45  | 0     | 0.41 | 0.17 | 0    | 1.56  | 0    | 0     | 0     | 0      |
| 71803 | 'Slc25a18'      | 29.52 | 20.77 | 4.57 | 23.8 | 1.51 | 39.35 | 16.5 | 23.75 | 11.87 | 4.82   |
| 71804 | 'Mfr2'          | 0.27  | 0.19  | 0.54 | 5.98 | 0.02 | 0.06  | 0.52 | 0.47  | 0.22  | 0.29   |
| 71805 | 'Nup93'         | 8.83  | 7.8   | 14.7 | 16.2 | 8.69 | 7.01  | 25.6 | 10.43 | 6.35  | 5.66   |
| 71807 | 'Tars2'         | 34.78 | 28.24 | 17   | 24.5 | 17.8 | 27.99 | 23.2 | 21.84 | 10.85 | 24.34  |
| 71810 | 'Ranbp3'        | 85.13 | 68.85 | 70.7 | 68.7 | 68.3 | 92.2  | 130  | 68.77 | 94.31 | 79.54  |
| 71816 | 'Rnf180'        | 10.49 | 10.55 | 15.1 | 12.2 | 6.43 | 0.07  | 9.65 | 14.44 | 8.16  | 13.67  |
| 71817 | 'Tmem50a'       | 263.4 | 262.3 | 164  | 306  | 206  | 285.5 | 133  | 267.1 | 241.6 | 298.97 |
| 71819 | 'Kif23'         | 0     | 0     | 0    | 0    | 0    | 0     | 0    | 0.03  | 0     | 0      |
| 71820 | 'Wdr34'         | 73.53 | 67.58 | 46.1 | 71.8 | 50   | 62.91 | 55.7 | 53.93 | 27.69 | 95.5   |
| 71827 | 'Lrrc34'        | 0.12  | 0     | 0.63 | 0    | 2.34 | 0     | 0.11 | 1.6   | 0     | 0      |
| 71828 | 'Gtf2a1l'       | 0     | 1.31  | 0    | 0    | 0.64 | 0     | 0    | 0     | 0     | 0      |
| 71829 | 'Ddi1'          | 0     | 0     | 0.03 | 0    | 0    | 0     | 0    | 0     | 0     | 0      |
| 71833 | 'Dcaf7'         | 29.57 | 30.02 | 55.2 | 23.5 | 21.5 | 21.59 | 32.8 | 28.47 | 48.63 | 42.17  |
| 71834 | 'Zbtb43'        | 2.21  | 1.5   | 1.9  | 4.02 | 0.3  | 6.28  | 1.88 | 2.48  | 2.54  | 3.37   |
| 71835 | 'Lancl2'        | 21.96 | 13.69 | 17.2 | 21.1 | 8.88 | 9.65  | 22.6 | 25.41 | 18.12 | 14.03  |
| 71836 | 'Shcbp1l'       | 1.17  | 0.31  | 3.06 | 4.51 | 1.35 | 3.57  | 0.47 | 0     | 2.74  | 0      |
| 71837 | '1700003E16Rik' | 9.31  | 21.76 | 9.51 | 11.8 | 29.6 | 23.73 | 8.94 | 8.71  | 16.91 | 23.19  |
| 71838 | 'Phf7'          | 0     | 4.26  | 2.84 | 8.03 | 10.6 | 3.46  | 5.22 | 4.04  | 0.88  | 7.44   |
| 71839 | 'Osgin1'        | 0     | 0     | 0    | 0    | 0    | 0     | 2.25 | 0     | 0     | 0      |
| 71840 | 'Tekt4'         | 1.49  | 5.04  | 0.1  | 0    | 0    | 1.12  | 0    | 1.38  | 0     | 0      |
| 71843 | 'R3hcc1'        | 12.24 | 16.43 | 26.4 | 5.57 | 28.9 | 17.91 | 14.4 | 15.48 | 13.35 | 26.42  |
| 71844 | 'Nup11'         | 13.74 | 11.47 | 5.08 | 5.02 | 11.4 | 2.71  | 15.4 | 9.29  | 4.39  | 14.96  |
| 71846 | 'Syce2'         | 5.62  | 6.76  | 8.57 | 17.5 | 0.34 | 9.63  | 8.94 | 3.64  | 26.59 | 9.31   |
| 71853 | 'Pdia6'         | 263   | 323.3 | 129  | 185  | 176  | 310.7 | 108  | 206.5 | 257.2 | 290.13 |
| 71856 | 'Wfdc3'         | 0     | 0     | 0    | 0    | 0.08 | 4.02  | 0    | 0.89  | 0     | 0      |
| 71860 | 'Cfap52'        | 0     | 0     | 0    | 0.19 | 0    | 3.74  | 0    | 0     | 0.09  | 4.58   |
| 71862 | 'Gpr160'        | 0     | 0     | 0    | 0.03 | 0    | 9.06  | 0    | 0     | 0     | 0      |
| 71865 | 'Fbxo30'        | 1.12  | 0.99  | 1.08 | 5.27 | 0.82 | 0     | 0.04 | 0     | 0.01  | 0.76   |
| 71868 | 'Thegl'         | 0     | 0     | 1.63 | 3.54 | 0    | 0     | 0.03 | 0.03  | 0.15  | 1.62   |
| 71870 | 'Cfap45'        | 12.32 | 5.38  | 3.32 | 0    | 0.03 | 0.38  | 19.3 | 1.61  | 1.4   | 4.65   |
| 71872 | 'Aox4'          | 0     | 0     | 0    | 0    | 0    | 0     | 0    | 1.77  | 0     | 0      |
| 71874 | '2310007B03Rik' | 0     | 0     | 0    | 0    | 0    | 0     | 0    | 0     | 0     | 1.73   |
| 71876 | 'Cenpu'         | 2.71  | 0     | 0    | 0    | 0.89 | 0     | 4.64 | 5.24  | 0.04  | 1.23   |
| 71877 | 'Efhc1'         | 0.02  | 1.91  | 0    | 0.42 | 0    | 2.81  | 0    | 7.38  | 0.02  | 0      |
| 71878 | 'Fam83d'        | 0     | 1.59  | 0    | 0.22 | 0.03 | 0     | 0    | 1.13  | 0     | 0      |
| 71881 | 'Apmap'         | 78    | 94.62 | 97.9 | 95.1 | 69.8 | 104.2 | 105  | 114.7 | 74.11 | 88.36  |
| 71883 | 'Coq2'          | 15.69 | 6.87  | 6.08 | 42.8 | 22.7 | 4.33  | 18.6 | 14.32 | 12.68 | 11.16  |
| 71885 | 'Faap100'       | 0.56  | 10.72 | 1.81 | 8.09 | 3.15 | 3.98  | 12.8 | 7.42  | 6.12  | 0.21   |
| 71886 | '2310002L09Rik' | 0     | 0     | 0.05 | 0    | 0.03 | 0     | 0    | 0     | 0     | 0      |
| 71887 | 'Ppm1j'         | 0     | 0.37  | 0    | 17.4 | 0    | 0     | 0    | 0     | 0     | 0      |
| 71889 | 'Epn3'          | 0     | 0.04  | 3.97 | 0    | 0.46 | 0.2   | 0.03 | 0     | 0     | 3.14   |
| 71890 | 'Mad2l2'        | 49.12 | 46.76 | 17.8 | 66.3 | 6.34 | 23.87 | 39.8 | 24.84 | 29.49 | 29.4   |
| 71891 | 'Cdadcl1'       | 76.1  | 49.23 | 33.9 | 76.6 | 44   | 72.5  | 30.8 | 42.55 | 64.98 | 72.35  |

|       |            |       |       |      |      |      |       |      |       |       |        |
|-------|------------|-------|-------|------|------|------|-------|------|-------|-------|--------|
| 71893 | 'Noxo1'    | 0     | 1.81  | 0    | 0    | 5.56 | 0.09  | 0    | 0.71  | 1.05  | 0.03   |
| 71897 | 'Lypd6b'   | 5.4   | 0     | 0    | 0    | 12.2 | 14.61 | 0.34 | 6.31  | 12.72 | 8.48   |
| 71900 | 'Tmem106b' | 9.85  | 5.58  | 8.92 | 13.5 | 10.5 | 3.99  | 11.7 | 9.35  | 5.78  | 7.35   |
| 71901 | 'Fam219a'  | 12.6  | 7.87  | 12   | 2.23 | 8.01 | 11.25 | 14.1 | 6.55  | 11.62 | 7.03   |
| 71902 | 'Cand1'    | 11.49 | 7.5   | 14.6 | 1.31 | 5.87 | 3.71  | 19.8 | 3.98  | 12.55 | 10.8   |
| 71903 | 'Ces2f'    | 0.29  | 0.29  | 0.29 | 0.21 | 0.25 | 0.25  | 0.32 | 0.1   | 0.37  | 0.3    |
| 71904 | 'Paqr7'    | 39.62 | 23.98 | 22.2 | 18.9 | 21.3 | 35.72 | 25.4 | 25.73 | 23.78 | 33.11  |
| 71907 | 'Serpina9' | 0     | 0     | 0    | 0    | 0    | 0     | 0    | 1.53  | 0     | 0      |
| 71908 | 'Cldn23'   | 2.89  | 2.95  | 0    | 3.37 | 0    | 0     | 0    | 0     | 0     | 4.9    |
| 71909 | 'Haus5'    | 5.27  | 2.97  | 3.83 | 14.5 | 0.04 | 7.78  | 0    | 2.86  | 7.41  | 7.48   |
| 71910 | 'Plpp5'    | 25.76 | 19.35 | 16.2 | 0.94 | 19.9 | 19.75 | 12.2 | 21.76 | 16.68 | 18.51  |
| 71911 | 'Bdh1'     | 17.04 | 18.05 | 32   | 26.2 | 27.3 | 18.69 | 19.5 | 31.16 | 16.39 | 18.91  |
| 71912 | 'Jsrp1'    | 2.04  | 0.4   | 2.22 | 0    | 3.99 | 0     | 3.23 | 2.55  | 0     | 0      |
| 71913 | 'Tmem79'   | 0.9   | 0     | 3.13 | 0    | 0    | 0     | 0    | 0     | 0.04  | 0      |
| 71914 | 'Antxr2'   | 0.01  | 0     | 0.01 | 0    | 0.01 | 0.01  | 0    | 0     | 0     | 0      |
| 71916 | 'Dus4l'    | 0     | 0     | 1.79 | 0    | 0    | 5.7   | 0.03 | 0.28  | 4.05  | 4.83   |
| 71918 | 'Zcchc24'  | 2.17  | 1.92  | 2.14 | 5.9  | 3.2  | 0.28  | 12.9 | 1.32  | 0.32  | 1.21   |
| 71919 | 'Rpap3'    | 23.41 | 20.46 | 28.9 | 13.8 | 14.5 | 24.01 | 10.9 | 31.72 | 31.92 | 9.99   |
| 71923 | 'Borcs6'   | 9.59  | 9.97  | 5.63 | 5.12 | 4.64 | 3.39  | 4.22 | 1.14  | 3.97  | 5.61   |
| 71924 | 'Tube1'    | 5.31  | 1.45  | 3.57 | 0.54 | 0.29 | 1.63  | 0.03 | 2.63  | 1.94  | 2.43   |
| 71927 | 'Itfg1'    | 142.7 | 161.2 | 174  | 167  | 87.3 | 95.18 | 151  | 118.5 | 176.2 | 105.51 |
| 71929 | 'Tmem123'  | 0.05  | 1.36  | 0    | 0    | 1.21 | 0.02  | 0    | 0     | 0     | 0      |
| 71932 | 'Ephx3'    | 0     | 0     | 0    | 0    | 0    | 0.04  | 0    | 0     | 0     | 0      |
| 71934 | 'Car13'    | 0     | 0.08  | 0    | 0    | 0    | 0     | 0    | 0     | 0     | 0      |
| 71939 | 'Apol6'    | 0.04  | 0.02  | 2.32 | 0.08 | 2.7  | 0.09  | 0.63 | 1.86  | 0.02  | 0.23   |
| 71941 | 'Cars2'    | 7.69  | 22.74 | 17.5 | 10.2 | 12.2 | 8.75  | 13.8 | 9.88  | 6.66  | 0.23   |
| 71943 | 'Tom11l1'  | 0.24  | 7.68  | 2.21 | 0.2  | 0.14 | 0.85  | 8.62 | 4.89  | 1.5   | 2.77   |
| 71946 | 'Endod1'   | 26.3  | 17.53 | 33.4 | 14.2 | 31.2 | 18.8  | 28   | 20.81 | 44.29 | 19.95  |
| 71947 | 'Tmem94'   | 8.94  | 3.69  | 4.06 | 0    | 5.1  | 0.72  | 9.6  | 1.82  | 4.9   | 5.46   |
| 71949 | 'Cers5'    | 30.42 | 27.17 | 33.5 | 74.6 | 36.1 | 9.32  | 38.4 | 29.59 | 41.58 | 28.83  |
| 71950 | 'Nanog'    | 0.49  | 0.28  | 0.65 | 0.56 | 0.65 | 0.41  | 0.12 | 0.1   | 0.95  | 0.32   |
| 71951 | 'Gpc2'     | 2.72  | 1.44  | 0.89 | 0    | 0.19 | 0     | 0    | 0     | 0     | 0      |
| 71952 | 'Riox1'    | 0.07  | 0     | 0    | 0    | 0    | 0     | 0    | 0.9   | 2.57  | 0      |
| 71954 | 'Suds3'    | 2.58  | 4.95  | 2.87 | 12.7 | 7.01 | 10.28 | 4.47 | 2.06  | 4.78  | 2      |
| 71955 | 'Ist1'     | 61.34 | 60.33 | 37.9 | 51.8 | 44.3 | 62.67 | 59.6 | 63.16 | 51.02 | 38.68  |
| 71956 | 'Rnf135'   | 3.9   | 6.46  | 2.53 | 0    | 2.95 | 5.56  | 0    | 1.91  | 2.57  | 6.06   |
| 71957 | 'Ints11'   | 28.33 | 32.36 | 30.8 | 18.2 | 49.6 | 57.65 | 20.9 | 53.26 | 29.06 | 25.5   |
| 71960 | 'Myh14'    | 2.3   | 0.29  | 1.06 | 0.01 | 2.3  | 0     | 0    | 0.93  | 0     | 0.02   |
| 71962 | 'Castor1'  | 1.7   | 0     | 0    | 2.5  | 0    | 0     | 11.2 | 2.96  | 0     | 1.9    |
| 71963 | 'Cdca4'    | 0     | 4.24  | 0    | 17.8 | 7.3  | 4.2   | 0.02 | 2.79  | 8.79  | 7.82   |
| 71966 | 'Nkiras2'  | 9.23  | 9.61  | 11.7 | 0.02 | 3.18 | 7.58  | 20.1 | 4.83  | 3.98  | 3.69   |
| 71967 | 'Mageb16'  | 0     | 0     | 0    | 0    | 1.12 | 0     | 0    | 0.05  | 0.5   | 0      |
| 71968 | 'Wdr73'    | 13.54 | 34.57 | 19.8 | 8.71 | 28.9 | 7.07  | 15.4 | 20.85 | 32.83 | 14.4   |
| 71970 | 'Zbed5'    | 9.57  | 7.24  | 4.24 | 8.01 | 1.63 | 5.52  | 14.1 | 8.95  | 1.49  | 7.94   |
| 71971 | 'Zswim1'   | 40.68 | 19.36 | 39.3 | 16.3 | 28.2 | 26.31 | 27.1 | 37.52 | 33.68 | 54.54  |
| 71972 | 'Dnmbp'    | 2.25  | 1.42  | 1.68 | 2.18 | 0.22 | 0.34  | 2.39 | 1.64  | 0.01  | 3.23   |
| 71973 | 'Rbpms2'   | 3.26  | 0     | 2.04 | 0    | 2.1  | 0     | 0    | 2.43  | 0     | 0.03   |
| 71974 | 'Prmt3'    | 9.11  | 16.75 | 7.43 | 13.5 | 9.17 | 1.86  | 5.59 | 3.66  | 13.17 | 2.72   |
| 71978 | 'Ppp2r2a'  | 37.09 | 47.67 | 48.3 | 45.2 | 36.9 | 41.53 | 62   | 40.23 | 36.94 | 30.37  |
| 71981 | 'Tdrd12'   | 0.76  | 0.01  | 0    | 0    | 0    | 0     | 2.96 | 0     | 0     | 0.76   |
| 71982 | 'Snx10'    | 106.9 | 112.8 | 103  | 80.7 | 112  | 65.03 | 98.6 | 87.37 | 114.2 | 97.23  |
| 71983 | 'Tmco6'    | 8.47  | 4.52  | 3.9  | 9.53 | 8.1  | 11.24 | 5.74 | 0.27  | 6.02  | 5.34   |
| 71984 | 'Sars2'    | 17.3  | 14.94 | 26.9 | 6.02 | 18.1 | 24.11 | 23.7 | 10.59 | 29.16 | 25.02  |
| 71985 | 'Acad10'   | 0     | 0.66  | 0.73 | 0    | 0    | 2.79  | 0    | 0.04  | 0.09  | 0.09   |
| 71986 | 'Ddx28'    | 20.74 | 5.83  | 18.9 | 8.01 | 4.73 | 11.66 | 5.88 | 22.99 | 19.84 | 6.27   |
| 71989 | 'Rpusd4'   | 12.62 | 1.24  | 5.22 | 10.9 | 6.8  | 1.3   | 1.12 | 1.64  | 13.99 | 9.44   |
| 71990 | 'Ddx54'    | 17.39 | 10.75 | 2.74 | 2.32 | 11.9 | 0.02  | 3.34 | 7.92  | 23.67 | 7.55   |
| 71991 | 'Ercc8'    | 7.12  | 6.73  | 3.45 | 0.46 | 10   | 0     | 9    | 14.82 | 9.65  | 2.35   |



|       |                 |       |       |      |      |      |       |      |       |       |        |
|-------|-----------------|-------|-------|------|------|------|-------|------|-------|-------|--------|
| 71994 | 'Cnn3'          | 14.78 | 43.53 | 44.4 | 41.7 | 27.4 | 31.73 | 54.4 | 27.78 | 16.58 | 17.83  |
| 71997 | 'Smg9'          | 20.36 | 17.93 | 17.7 | 29.5 | 30.5 | 11.87 | 3.18 | 16.19 | 39.21 | 18.76  |
| 71998 | 'Slc25a35'      | 2.42  | 0     | 0    | 0    | 1.5  | 0     | 0.03 | 0.05  | 4.93  | 0      |
| 71999 | 'Fbxo22'        | 55.76 | 36.82 | 68.6 | 53.7 | 42.6 | 19.92 | 40.4 | 38.11 | 45.96 | 47.5   |
| 72002 | 'Slc39a5'       | 0     | 0     | 0    | 0    | 0    | 0.95  | 0    | 0     | 0     | 0      |
| 72003 | 'Synpr'         | 14.95 | 48.46 | 119  | 45.7 | 3.5  | 12.41 | 115  | 52.22 | 0.05  | 41.91  |
| 72007 | 'Fndc3b'        | 0.54  | 1.33  | 0.57 | 0.66 | 1.47 | 0.01  | 0    | 1.43  | 1.14  | 3.71   |
| 72008 | 'Zfyve19'       | 27.11 | 29.27 | 20.2 | 82.6 | 24.8 | 41.1  | 24.2 | 20.87 | 37.48 | 39.86  |
| 72014 | 'Btbd17'        | 5.76  | 9.44  | 1.65 | 0.07 | 12.4 | 3.31  | 6.53 | 7.57  | 13.33 | 0.18   |
| 72016 | 'Tedc2'         | 4.03  | 1.65  | 3.64 | 0.16 | 2.17 | 4.44  | 0.5  | 0.6   | 9.05  | 4.66   |
| 72017 | 'Cyb5r1'        | 19.96 | 22.28 | 12.2 | 18.2 | 34.4 | 28.13 | 9.42 | 31.44 | 42.84 | 31.03  |
| 72018 | 'Fundc1'        | 62.81 | 37.92 | 67.1 | 56.5 | 54.3 | 89.86 | 62.2 | 73.52 | 56.26 | 73.21  |
| 72020 | 'Zfp654'        | 1.51  | 0.16  | 0.18 | 2.79 | 0.2  | 0.01  | 3.01 | 3.36  | 0.03  | 0.29   |
| 72022 | 'Slc35f2'       | 0     | 2.2   | 0    | 0    | 0.02 | 4.95  | 5.29 | 3.95  | 0     | 0      |
| 72023 | 'Cyb561d1'      | 1.36  | 1.19  | 1.86 | 0    | 8.22 | 1.8   | 0    | 3.69  | 3.41  | 4.09   |
| 72026 | 'Trmu'          | 51.24 | 34.57 | 41.3 | 2.51 | 39.5 | 48.64 | 46.7 | 17.29 | 45.09 | 41.66  |
| 72029 | 'Cnpy3'         | 49.69 | 82.06 | 71.9 | 46.4 | 59.9 | 78.64 | 72.4 | 65.63 | 97.06 | 95.75  |
| 72033 | 'Tsc22d2'       | 2.2   | 2.03  | 7.49 | 2.7  | 2.54 | 1.54  | 0    | 1.95  | 1.87  | 2.68   |
| 72039 | 'Mccc1'         | 10.22 | 18.14 | 22.5 | 4.65 | 37.9 | 12.59 | 23.3 | 20.63 | 12.12 | 15.92  |
| 72041 | 'Alkbh4'        | 5.98  | 2.92  | 6.37 | 0    | 6.5  | 12.24 | 11   | 4.63  | 4.8   | 4.44   |
| 72042 | 'Cotl1'         | 103.7 | 79.1  | 98.7 | 41.4 | 104  | 116.9 | 105  | 118   | 61.5  | 146.29 |
| 72043 | 'Sulf2'         | 2.68  | 5.8   | 20.5 | 0    | 13.1 | 8.6   | 21.6 | 13.65 | 9.56  | 13.3   |
| 72046 | 'Urgcp'         | 35.82 | 24.8  | 33.5 | 1.36 | 27.9 | 14    | 24.2 | 43.08 | 26.07 | 22.44  |
| 72047 | 'Ddx42'         | 23.44 | 21.87 | 27.4 | 40.8 | 25.6 | 12.68 | 23.4 | 30.05 | 32.51 | 35.13  |
| 72049 | 'Tnfrsf13c'     | 0     | 0.53  | 0    | 0    | 0    | 0     | 0    | 0     | 0     | 0      |
| 72050 | 'Kdelc1'        | 10.49 | 5.23  | 5.52 | 0    | 7.9  | 11.46 | 8.51 | 8.53  | 6.06  | 14.07  |
| 72053 | 'Tmub2'         | 54.14 | 50.34 | 65.9 | 29.9 | 55.7 | 89.75 | 50.4 | 56.9  | 29.09 | 52.44  |
| 72054 | 'Cyp4f18'       | 0     | 0     | 0.08 | 0    | 0    | 0     | 0    | 0.19  | 0     | 0.45   |
| 72055 | 'Slc38a10'      | 34.31 | 26.87 | 40.4 | 19.1 | 29.8 | 39.46 | 19.6 | 46.11 | 58.44 | 78.37  |
| 72056 | '1810055G02Rik' | 0.1   | 5.33  | 7.75 | 22.8 | 6.22 | 6.41  | 20.8 | 2.78  | 0.02  | 7.38   |
| 72057 | 'Phf10'         | 6.78  | 2.98  | 1.34 | 1.12 | 0.31 | 4.27  | 0    | 1.1   | 0.94  | 0      |
| 72061 | '2010111101Rik' | 2.11  | 2.81  | 5.14 | 0.02 | 3.54 | 6.09  | 4.1  | 4.23  | 8.42  | 2.86   |
| 72065 | 'Rap2c'         | 0.88  | 1.67  | 2.45 | 0    | 0.27 | 0.05  | 1.91 | 2.99  | 0     | 0.24   |
| 72068 | 'Cnot2'         | 10.8  | 23.6  | 22.3 | 16.3 | 14.9 | 19.79 | 8.78 | 20.03 | 24.84 | 25.37  |
| 72075 | 'Ogfr'          | 10.53 | 10.64 | 27.3 | 16.8 | 14.2 | 15.35 | 9.18 | 16.35 | 17.11 | 7.55   |
| 72077 | 'Gcnt3'         | 0     | 0     | 0    | 0    | 0    | 0.01  | 0    | 0     | 0     | 0      |
| 72080 | 'Sapcd2'        | 0     | 0     | 8.72 | 0    | 0.39 | 0     | 10.6 | 0     | 0     | 0      |
| 72083 | 'Mzt2'          | 31.03 | 34.91 | 15   | 50.9 | 11.4 | 50.9  | 32.8 | 35.37 | 31.67 | 23.22  |
| 72084 | 'Pigx'          | 35.78 | 30.51 | 25.9 | 53   | 36.1 | 29.36 | 18.5 | 36.72 | 27.89 | 25.48  |
| 72085 | 'Osgepl1'       | 16.65 | 17.47 | 7.1  | 13.7 | 12.9 | 15.36 | 10.8 | 17.92 | 5.07  | 10.02  |
| 72088 | 'Ush1c'         | 0     | 4.56  | 0.02 | 0    | 0    | 0     | 0    | 1.94  | 0     | 0.75   |
| 72096 | 'Eef1akmt2'     | 25.84 | 14.79 | 17.9 | 6.71 | 31.7 | 42.77 | 22.5 | 21.51 | 21.97 | 26.49  |
| 72097 | '2010300C02Rik' | 3.16  | 3.42  | 1.93 | 2.98 | 4.55 | 0.13  | 8.28 | 0.25  | 5.13  | 1.73   |
| 72098 | 'Tmem68'        | 23.43 | 24.33 | 15.4 | 20.4 | 7.42 | 13.95 | 10.1 | 18.63 | 12.25 | 22.94  |
| 72102 | 'Dusp11'        | 5.98  | 4.68  | 2.89 | 3.19 | 3.28 | 5.43  | 6.45 | 3.7   | 2.21  | 4.73   |
| 72103 | 'Aplf'          | 0.63  | 1.02  | 0.49 | 0.41 | 1.74 | 1.42  | 0.27 | 2.1   | 0.09  | 1.5    |
| 72106 | 'Jmjd8'         | 65.31 | 60.65 | 66.6 | 24.4 | 33.2 | 58.62 | 33   | 41.58 | 35.6  | 44.76  |
| 72108 | 'Ddhd2'         | 32.41 | 33.44 | 30.9 | 34.5 | 39.5 | 52.89 | 49.2 | 25.68 | 39.2  | 42.78  |
| 72112 | 'Ppp1r14d'      | 0     | 0     | 0    | 0    | 4.96 | 0     | 0    | 0     | 0     | 0      |
| 72113 | 'Adck1'         | 8.78  | 6.29  | 43.1 | 21.9 | 20.3 | 2.72  | 35.6 | 25    | 15.86 | 20.79  |
| 72114 | 'Zbed3'         | 1.54  | 3.59  | 8.67 | 4.18 | 10.7 | 0.35  | 2.83 | 5.64  | 14.93 | 8.93   |
| 72117 | 'Naa50'         | 13.55 | 21.37 | 16.1 | 32.8 | 10.9 | 11.31 | 27   | 8.39  | 21.98 | 9.41   |
| 72119 | 'Tpx2'          | 0     | 0     | 0    | 4.69 | 0    | 0     | 0    | 0.01  | 0     | 0      |
| 72121 | 'Dennd2d'       | 0     | 0.04  | 0    | 2.05 | 2.68 | 0     | 1.49 | 0.06  | 1.68  | 2.94   |
| 72123 | 'Ccadc71l'      | 0     | 0.14  | 0.11 | 0    | 1.17 | 0     | 1.39 | 0.16  | 0.21  | 0.26   |
| 72124 | 'Seh1l'         | 43.85 | 30.53 | 22.2 | 33.6 | 27.1 | 23.63 | 51.4 | 47.97 | 25.42 | 27.07  |
| 72125 | 'Amer2'         | 3.83  | 1.77  | 6.77 | 2.91 | 2.29 | 8.68  | 1.42 | 1.19  | 0.95  | 2.13   |
| 72128 | '2610008E11Rik' | 6.67  | 2.43  | 7.96 | 2.8  | 2.97 | 2.73  | 3.06 | 3.36  | 2.4   | 5.6    |

|       |                  |       |       |      |      |      |       |      |       |       |        |
|-------|------------------|-------|-------|------|------|------|-------|------|-------|-------|--------|
| 72129 | 'Pex13'          | 9.45  | 5.42  | 12.1 | 10.6 | 12.2 | 14.45 | 13.4 | 11.8  | 7.98  | 9.62   |
| 72133 | 'Trub1'          | 11.8  | 4.37  | 15.5 | 6.15 | 10.7 | 8.66  | 6.93 | 13.75 | 6.24  | 5.78   |
| 72135 | 'Pygo1'          | 2.49  | 0     | 1.78 | 2.66 | 0.45 | 0     | 3.58 | 0     | 0     | 0      |
| 72136 | 'Chst14'         | 2.7   | 2.9   | 0    | 0    | 0.02 | 0     | 3.67 | 0.02  | 0     | 0      |
| 72137 | 'Wdsub1'         | 9.29  | 5.97  | 9.95 | 18.4 | 10.5 | 2.1   | 9.14 | 10.66 | 20.61 | 4      |
| 72139 | '2610044O15Rik8' | 16.06 | 12.82 | 9.94 | 22.2 | 7.94 | 27.79 | 4.14 | 15.64 | 8.72  | 14.35  |
| 72140 | 'Cep89'          | 9.82  | 7.53  | 15   | 11   | 6.83 | 10.46 | 1.14 | 5.07  | 10.09 | 19.33  |
| 72141 | 'Adpgk'          | 29.59 | 26.85 | 36.7 | 32.4 | 15.3 | 40.31 | 65.5 | 35.41 | 48.5  | 16.7   |
| 72144 | 'Slc37a3'        | 11.86 | 13.39 | 7.4  | 9.24 | 4.79 | 4.51  | 6.71 | 8.92  | 24.49 | 26.23  |
| 72145 | 'Wdfy3'          | 7.45  | 11.38 | 8.46 | 11.3 | 9.85 | 7.29  | 5.52 | 7.05  | 9.72  | 9.08   |
| 72147 | 'Zbtb46'         | 0.94  | 3.04  | 0.5  | 1.73 | 4.14 | 6.04  | 11.2 | 5.79  | 3.45  | 0.01   |
| 72148 | 'Tdrp'           | 17.56 | 28.08 | 15   | 24.2 | 4.7  | 10.14 | 14.6 | 13.72 | 17.02 | 5.8    |
| 72149 | 'Strada'         | 4.09  | 6.49  | 8.77 | 9.83 | 19.3 | 13.23 | 3.84 | 9.53  | 1.24  | 6.48   |
| 72151 | 'Rfc5'           | 0.54  | 10.9  | 0    | 1.26 | 2.29 | 5.29  | 0.03 | 8.59  | 3.42  | 6.3    |
| 72154 | 'Zfp157'         | 4.42  | 3     | 8.57 | 7.51 | 1.25 | 1.25  | 7.71 | 5.15  | 3.1   | 2.92   |
| 72155 | 'Cenpn'          | 4.49  | 0.03  | 0    | 4.45 | 0.77 | 0     | 0    | 3.81  | 0     | 0      |
| 72157 | 'Pgm2'           | 97.11 | 124.8 | 107  | 105  | 70.5 | 126.6 | 114  | 97.87 | 94.96 | 147.01 |
| 72160 | 'Tmem163'        | 0.6   | 10.67 | 18.5 | 25.4 | 0.06 | 12.39 | 12.1 | 12.61 | 25.82 | 17.09  |
| 72162 | 'Dhx36'          | 5.83  | 3.35  | 4.2  | 7.27 | 8.67 | 4.69  | 7    | 5.5   | 5.03  | 6.28   |
| 72167 | 'Thumpd2'        | 1.49  | 4.99  | 5.59 | 0.39 | 2.77 | 4.77  | 7    | 6.62  | 10.26 | 1.14   |
| 72168 | 'Aifm3'          | 29.78 | 43.81 | 14.8 | 26.7 | 63.5 | 66.11 | 14.5 | 17.65 | 27.4  | 92.1   |
| 72169 | 'Trim29'         | 0     | 0     | 0    | 0    | 0    | 0     | 0    | 1.05  | 0     | 0      |
| 72170 | 'Chchd4'         | 122.5 | 95.66 | 136  | 222  | 95.5 | 78.22 | 80.8 | 99.89 | 140.6 | 64.77  |
| 72171 | 'Shq1'           | 4.94  | 3.02  | 5.7  | 5.47 | 4.09 | 6.18  | 14.6 | 4.81  | 3.92  | 2.3    |
| 72175 | 'Mfsd8'          | 7.9   | 1.92  | 1.79 | 7.5  | 0    | 2.12  | 3.65 | 4.21  | 6.33  | 6.7    |
| 72179 | 'Fbxl2'          | 67.96 | 57.39 | 38.6 | 34   | 39.2 | 14.74 | 33.8 | 30.24 | 53.87 | 84.19  |
| 72180 | 'Zfp661'         | 4.94  | 2.37  | 0.02 | 0    | 0.35 | 0.11  | 2.7  | 4     | 0     | 1.66   |
| 72181 | 'Nsun4'          | 3.9   | 10.89 | 17.1 | 0.02 | 7.34 | 10.96 | 9.57 | 5.47  | 15.13 | 9.03   |
| 72183 | 'Snx6'           | 48.65 | 56.35 | 38.6 | 55.8 | 43.1 | 35.52 | 30.3 | 45.19 | 40.04 | 49.45  |
| 72184 | 'Klhl35'         | 0     | 0.61  | 0.17 | 0    | 0.17 | 0     | 0.03 | 0     | 0.64  | 0.83   |
| 72185 | 'Dbnnd1'         | 41.85 | 35.95 | 24.4 | 33.3 | 45.7 | 67.7  | 32.2 | 50.65 | 58.72 | 29.7   |
| 72190 | '2510009E07Rik'  | 3.72  | 4.21  | 5.85 | 2.23 | 3.55 | 1.96  | 3.84 | 1.2   | 2.54  | 1.15   |
| 72193 | 'Scaf11'         | 4.75  | 5.41  | 4.28 | 5.16 | 4.32 | 1.9   | 0.68 | 3.42  | 3.73  | 2.67   |
| 72194 | 'Fbxl20'         | 0.56  | 1.44  | 2.13 | 9.01 | 1.78 | 1.41  | 0.83 | 1.6   | 1.23  | 1.92   |
| 72195 | 'Supt7l'         | 6.87  | 9.13  | 5.74 | 8.61 | 4.05 | 0.07  | 3.11 | 10.82 | 25.34 | 11.73  |
| 72198 | 'Mtrex'          | 18.91 | 19.66 | 9.17 | 10.8 | 15.5 | 14.29 | 25.2 | 21.75 | 20.05 | 26.32  |
| 72199 | 'Mms19'          | 12.64 | 5.53  | 21.3 | 5.46 | 10.9 | 10.2  | 15.7 | 0.25  | 6.92  | 17.8   |
| 72201 | 'Otud6b'         | 22.65 | 24.89 | 23.3 | 10.8 | 27.8 | 19.95 | 24.6 | 25.35 | 10.26 | 31     |
| 72205 | 'Eml2'           | 11.29 | 11.86 | 5.45 | 1.91 | 27.3 | 16.32 | 19.9 | 14.96 | 16.31 | 9.46   |
| 72215 | '1700001P01Rik'  | 0     | 0     | 0    | 0    | 0    | 0     | 0    | 0     | 0.53  | 0      |
| 72230 | 'Zfp558'         | 0.56  | 2.08  | 1.63 | 0    | 2.47 | 0.01  | 6.01 | 3.06  | 2.87  | 0.06   |
| 72236 | 'Tsnaxip1'       | 0     | 0     | 0.02 | 0    | 0    | 0     | 0    | 0.18  | 0.02  | 0      |
| 72238 | 'Tbc1d5'         | 0.94  | 3.14  | 4.64 | 0    | 3.12 | 1.05  | 1.48 | 0.97  | 4.45  | 4.05   |
| 72244 | '1600014C10Rik'  | 24.05 | 11.58 | 17.9 | 26   | 21.1 | 28.27 | 12.9 | 11.84 | 21.51 | 19.38  |
| 72254 | '1700030K09Rik'  | 12.46 | 8.85  | 5.19 | 2.52 | 10.5 | 10.83 | 21.3 | 4.12  | 13.53 | 7.49   |
| 72258 | 'Kcnk10'         | 0.01  | 1.75  | 4.54 | 0    | 2.11 | 0     | 5.27 | 0.44  | 1.57  | 0.16   |
| 72265 | 'Tram1'          | 8.21  | 10.34 | 3.14 | 19.7 | 9.62 | 13.38 | 11   | 6.16  | 24.31 | 13.04  |
| 72267 | 'Lrrc8e'         | 0.09  | 0.1   | 0.11 | 0.03 | 0.1  | 0.08  | 0.03 | 0.06  | 0.15  | 0.08   |
| 72269 | 'Cda'            | 4.84  | 6.38  | 10.5 | 41.3 | 11.4 | 20.41 | 44.7 | 20.51 | 8.66  | 0      |
| 72273 | 'Smim24'         | 4.22  | 1.73  | 11.3 | 9.17 | 0    | 0     | 6.26 | 8.49  | 26.28 | 4.41   |
| 72275 | '2200002D01Rik'  | 0     | 1.26  | 0    | 0    | 0    | 0     | 0    | 0     | 0     | 0      |
| 72278 | 'Ccpq1'          | 69.59 | 74.82 | 51.1 | 45.1 | 42.1 | 54.52 | 52.4 | 49.48 | 50.28 | 71.87  |
| 72281 | 'Sh2d4a'         | 0     | 0     | 0    | 0    | 0.02 | 0     | 5.98 | 0     | 0     | 0      |
| 72284 | 'LTO1'           | 15.78 | 13.38 | 14.9 | 13.8 | 10.9 | 16.15 | 29.7 | 17.68 | 23.89 | 18.35  |
| 72287 | 'Plekhf1'        | 3.63  | 2.87  | 5.37 | 0    | 0    | 0     | 0    | 2.76  | 0     | 0      |
| 72290 | 'Lsm11'          | 0.05  | 0.13  | 1.16 | 2.58 | 0.4  | 0.06  | 1.04 | 0.12  | 0.48  | 0.17   |
| 72293 | 'Nkd2'           | 0     | 0.01  | 0    | 0    | 0    | 0     | 0    | 2.45  | 8.34  | 0.01   |
| 72296 | 'Rusc1'          | 33.69 | 28.25 | 53.7 | 12.7 | 30.6 | 20.55 | 45.6 | 28.38 | 36.58 | 14.1   |

|       |                 |       |       |      |      |      |       |      |       |       |        |
|-------|-----------------|-------|-------|------|------|------|-------|------|-------|-------|--------|
| 72297 | 'B3gnt3'        | 0     | 0     | 0    | 0    | 0    | 0     | 0.02 | 0     | 0     | 0      |
| 72301 | 'Shisal1'       | 3.02  | 3.02  | 8.72 | 5.33 | 14.5 | 4.02  | 12.1 | 5.93  | 8.94  | 2.13   |
| 72303 | 'Cyp2c65'       | 0.02  | 0     | 0    | 0    | 0    | 0     | 0    | 0     | 0     | 0      |
| 72306 | 'Zfp777'        | 3.38  | 3.82  | 8.95 | 2.17 | 7.11 | 3.34  | 4.37 | 9.04  | 8.13  | 8.85   |
| 72307 | '2510002D24Rik' | 34.39 | 33.41 | 57.8 | 69.6 | 60.1 | 74.27 | 70.4 | 47.09 | 49.99 | 49.96  |
| 72308 | 'Brf1'          | 2.8   | 7.87  | 2.83 | 4.12 | 1.66 | 3     | 5.36 | 4.08  | 11.29 | 7.16   |
| 72309 | 'Tmem158'       | 12.55 | 7.37  | 10.5 | 54.6 | 13.2 | 4.22  | 6.8  | 2.8   | 5.71  | 7.88   |
| 72310 | 'Nkg7'          | 0     | 3.17  | 0    | 0    | 0    | 0     | 0    | 0     | 0     | 0      |
| 72313 | 'Fryl'          | 1.53  | 3.14  | 2.07 | 2.33 | 3.73 | 1.71  | 4.51 | 1.67  | 4.41  | 1.37   |
| 72315 | 'Ccdc74a'       | 3.42  | 3.91  | 3.65 | 27.7 | 3.69 | 6.07  | 0    | 5.79  | 0.43  | 3.58   |
| 72318 | 'Cyth4'         | 0.02  | 1.69  | 0    | 0    | 0.25 | 1.05  | 0    | 0     | 0.02  | 2.29   |
| 72320 | 'Kif1bp'        | 20.01 | 17.1  | 22.1 | 13.9 | 11.3 | 20.91 | 40.9 | 43.1  | 40.8  | 16.69  |
| 72322 | 'Xpo5'          | 3.91  | 9.94  | 17.9 | 6.17 | 3.22 | 3.59  | 6.27 | 9.73  | 10.48 | 9.56   |
| 72323 | 'Asb6'          | 23.79 | 29.54 | 6.64 | 17.7 | 17.8 | 13.94 | 23.6 | 33.17 | 25.49 | 32.94  |
| 72324 | 'Plxdc1'        | 8.83  | 8.34  | 20.4 | 0.02 | 7.52 | 2.23  | 12.5 | 5.69  | 3.58  | 8.4    |
| 72325 | 'Vps9d1'        | 7.5   | 6.25  | 11.9 | 2.76 | 7.89 | 6.77  | 16.9 | 10.55 | 10.18 | 13.61  |
| 72330 | 'Klhl40'        | 0.07  | 0     | 0.02 | 0.07 | 0    | 0.02  | 0.02 | 0     | 8.36  | 0      |
| 72333 | 'Pald'          | 1.66  | 8.01  | 6.71 | 4.77 | 0.9  | 1.93  | 5.44 | 5.51  | 6.71  | 3.12   |
| 72338 | 'Wdr89'         | 4.18  | 3.96  | 4.84 | 0.31 | 0.28 | 1.8   | 7.74 | 1.29  | 3.98  | 4.96   |
| 72341 | 'Elp6'          | 30.46 | 32.13 | 36.4 | 35.8 | 15.1 | 18.48 | 27.6 | 17.03 | 10.33 | 15.49  |
| 72344 | 'Usp36'         | 4.66  | 5.24  | 7.77 | 13.9 | 5.6  | 3.68  | 9.22 | 2.52  | 7.83  | 6.85   |
| 72345 | 'Amer1'         | 2.55  | 0.95  | 1.56 | 2.34 | 2.02 | 3.62  | 1.07 | 1.55  | 0.71  | 0.9    |
| 72349 | 'Dusp3'         | 57.13 | 44.92 | 34.8 | 72.4 | 103  | 72.74 | 34.2 | 67.44 | 75.27 | 85.97  |
| 72350 | 'Zc2hc1c'       | 3.42  | 3.36  | 7.55 | 4.98 | 2.01 | 2.01  | 1.66 | 0     | 4.62  | 1.1    |
| 72351 | 'Ptar1'         | 1.19  | 0.53  | 2.18 | 0    | 3.13 | 4.37  | 0    | 0.58  | 0.82  | 0.26   |
| 72354 | 'Ttc4'          | 39.99 | 47.35 | 58.3 | 34.8 | 81.6 | 50.63 | 41.3 | 68.08 | 55.73 | 55.05  |
| 72355 | 'Cdpf1'         | 34.16 | 26.27 | 27.5 | 17.2 | 38.1 | 72.96 | 30.3 | 12.15 | 41.06 | 11.95  |
| 72357 | '2210016L21Rik' | 260.4 | 179.8 | 257  | 246  | 252  | 300.9 | 313  | 267.7 | 289.5 | 239.69 |
| 72368 | 'Borcs8'        | 78.74 | 64.86 | 28.1 | 39.2 | 46.9 | 87.39 | 49.8 | 67.12 | 73.8  | 93.06  |
| 72371 | '2210408I21Rik' | 4.59  | 6.4   | 6.45 | 0    | 5.36 | 8.61  | 4.72 | 6.27  | 4.05  | 5.37   |
| 72388 | 'Ripk4'         | 0     | 0     | 0    | 0    | 1.05 | 0     | 0    | 0     | 0     | 0      |
| 72391 | 'Cdkn3'         | 7.85  | 0     | 0    | 0    | 0.94 | 0     | 0    | 1.01  | 0     | 0      |
| 72392 | 'Tmem175'       | 35.9  | 52.38 | 33.6 | 42.9 | 38.9 | 73.12 | 51.5 | 79.25 | 64.94 | 68.3   |
| 72393 | 'Faim2'         | 333.5 | 330.1 | 297  | 189  | 318  | 390   | 386  | 377   | 365.6 | 327.64 |
| 72397 | 'Rbm12b1'       | 3.06  | 2.17  | 1.36 | 6.31 | 1.01 | 5.12  | 8.04 | 0.99  | 3.29  | 5.51   |
| 72399 | 'Brap'          | 6.27  | 5.19  | 10.3 | 13.8 | 18.9 | 3.74  | 1.66 | 1.87  | 4.51  | 4.4    |
| 72400 | 'Pinx1'         | 6.92  | 5.49  | 2.28 | 12.6 | 3.76 | 0     | 5.41 | 4.71  | 2.42  | 0      |
| 72404 | 'Wdr44'         | 1.84  | 1.66  | 0.59 | 6.01 | 1.75 | 3.35  | 3.13 | 2.2   | 1.36  | 3.81   |
| 72413 | 'Kcnmb2'        | 0     | 2.02  | 0    | 0    | 23.1 | 0     | 3.82 | 0     | 0     | 0      |
| 72415 | 'Sgo1'          | 0     | 0     | 0    | 0    | 0    | 0     | 0    | 0     | 3.36  | 0.63   |
| 72416 | 'Lrpprc'        | 6.96  | 12.4  | 33.2 | 28.8 | 13.5 | 8.88  | 32.3 | 16.39 | 26.79 | 28.12  |
| 72421 | 'Ttc30b'        | 40.31 | 29.32 | 24.1 | 27.4 | 20.8 | 12.12 | 14.9 | 29.33 | 17.61 | 18.66  |
| 72425 | 'Katnbl1'       | 7.91  | 8.82  | 2.86 | 0.02 | 1.59 | 0.5   | 0.06 | 11.26 | 4.2   | 6.5    |
| 72429 | 'Dnajc25'       | 0.7   | 0.03  | 0.06 | 3.04 | 0.82 | 0     | 0    | 0.71  | 1.25  | 1.97   |
| 72433 | 'Rab38'         | 1.16  | 0     | 0    | 0    | 0    | 0     | 0    | 0     | 0     | 3.61   |
| 72434 | 'Lypd3'         | 0     | 0     | 1.79 | 0    | 0    | 6.68  | 0    | 0.99  | 1.7   | 4.62   |
| 72440 | 'Rhno1'         | 19.79 | 6.31  | 5.49 | 27.2 | 14.3 | 21.96 | 18.2 | 8.91  | 18.77 | 27.03  |
| 72446 | 'Prr5l'         | 1.2   | 1.87  | 0.06 | 0.06 | 0.06 | 0.42  | 0.02 | 0     | 0     | 2.06   |
| 72454 | 'Ccdc71'        | 35.38 | 15.91 | 14   | 6.21 | 7.44 | 15.66 | 10   | 22.56 | 24.86 | 15.89  |
| 72459 | 'Htatsf1'       | 41.98 | 31.93 | 30.5 | 25.6 | 27   | 23.99 | 28.1 | 33.53 | 32.6  | 5.24   |
| 72461 | 'Prpc'          | 3.9   | 3.97  | 5.79 | 0    | 4.15 | 2.62  | 11.7 | 2.88  | 2.58  | 3.87   |
| 72462 | 'Rrp1b'         | 6.79  | 19.33 | 9.48 | 0.39 | 5.66 | 22.23 | 15.7 | 11.01 | 4.99  | 9.23   |
| 72465 | 'Zfp131'        | 8.46  | 7.99  | 5.82 | 21.5 | 3.25 | 0.46  | 1.83 | 10.3  | 7.04  | 5.79   |
| 72469 | 'Plcd3'         | 0     | 6.24  | 2.42 | 0.17 | 2.34 | 0.19  | 1.61 | 3.04  | 0.28  | 0.07   |
| 72472 | 'Slc16a10'      | 0.8   | 0.1   | 0.25 | 0.64 | 1.51 | 0.04  | 0.19 | 0.14  | 0.31  | 1      |
| 72475 | 'Ssbp3'         | 28.49 | 30.26 | 30.3 | 81.2 | 24   | 23.75 | 29.6 | 17.26 | 11.05 | 31.56  |
| 72477 | 'Tmem87b'       | 16.16 | 8.73  | 10.4 | 6.69 | 12.8 | 12.68 | 10.5 | 8.39  | 8.49  | 11.72  |
| 72479 | 'Hsd12'         | 9.9   | 8.9   | 16.2 | 5.86 | 15.2 | 7.5   | 14   | 13.47 | 4.44  | 6.58   |

|       |                 |       |       |      |      |      |       |      |       |       |        |
|-------|-----------------|-------|-------|------|------|------|-------|------|-------|-------|--------|
| 72480 | 'Tspyl4'        | 214.4 | 185.1 | 247  | 113  | 154  | 91.06 | 210  | 245.5 | 234.8 | 151.06 |
| 72482 | 'Acbd6'         | 27.43 | 11.25 | 30.5 | 45   | 20.8 | 15.36 | 23.1 | 15.51 | 21.86 | 4.99   |
| 72486 | 'Rnf219'        | 3.85  | 6.97  | 3    | 1.58 | 9.54 | 7.52  | 8.12 | 5.43  | 0.7   | 1.44   |
| 72500 | 'Ier5l'         | 0.03  | 0     | 2.6  | 0    | 1.62 | 0     | 2.55 | 0     | 0     | 0      |
| 72502 | 'Cwf19l1'       | 0.03  | 3.83  | 5.08 | 4.68 | 3.83 | 0.79  | 16.3 | 9.36  | 7.89  | 2.21   |
| 72503 | '2610507B11Rik' | 3.76  | 8.78  | 15.5 | 5.58 | 6    | 4.24  | 7.59 | 9.71  | 6.42  | 5.05   |
| 72504 | 'Taf4b'         | 0.48  | 0     | 0    | 0    | 0.7  | 0     | 0.02 | 1.75  | 0     | 0      |
| 72507 | 'Dzip1l'        | 3.72  | 2.31  | 3.89 | 0    | 4.43 | 2.51  | 1.5  | 3.19  | 1.8   | 1.78   |
| 72508 | 'Rps6kb1'       | 13.81 | 25.19 | 20.5 | 16.6 | 21.2 | 10.94 | 16.6 | 24.29 | 9.96  | 28.66  |
| 72512 | 'Tmem173'       | 0     | 0     | 0    | 0    | 0.02 | 26.37 | 0    | 0     | 0.02  | 0      |
| 72514 | 'Fgfbp3'        | 1.84  | 0     | 0    | 0    | 0.99 | 1.41  | 4.22 | 0.34  | 0     | 0      |
| 72515 | 'Wdr43'         | 20.14 | 14    | 9.25 | 9.94 | 12.3 | 7.51  | 9.02 | 12.44 | 11.84 | 16.3   |
| 72519 | 'Pip4p2'        | 30.63 | 36.59 | 24.3 | 19.5 | 15.3 | 15.59 | 9.09 | 26.08 | 26.46 | 23.01  |
| 72522 | 'Atxn7l2'       | 6.15  | 7.39  | 5.72 | 0.02 | 4.08 | 0.13  | 8.82 | 10.32 | 1.45  | 4.6    |
| 72535 | 'Aldh1b1'       | 11.81 | 4.77  | 2.98 | 4.81 | 7.62 | 28.02 | 20.3 | 12.06 | 24.43 | 17.69  |
| 72536 | 'Tagap'         | 0.06  | 0.4   | 0.06 | 0    | 0.41 | 0.89  | 0.02 | 0.36  | 0.04  | 1.98   |
| 72542 | 'Pgam5'         | 28.38 | 36.38 | 34.9 | 68.1 | 26.8 | 24.04 | 32.1 | 28.06 | 24.78 | 54.97  |
| 72543 | 'Mvb12b'        | 5.55  | 6.75  | 2.72 | 3.57 | 4.41 | 0.23  | 7.27 | 4.68  | 4.6   | 1.44   |
| 72544 | 'Exosc6'        | 1.9   | 0.26  | 0    | 18.9 | 0.49 | 0     | 11   | 0.62  | 0     | 0      |
| 72549 | 'Reep4'         | 5.84  | 0.06  | 2.99 | 0    | 0    | 4.75  | 0.03 | 2.36  | 4.95  | 0      |
| 72552 | 'Hsd1l'         | 70.7  | 57.94 | 80.1 | 24.8 | 109  | 48.91 | 78.4 | 67.35 | 76.47 | 83.36  |
| 72554 | 'Utp14a'        | 4.86  | 6.53  | 2.5  | 3.02 | 6.68 | 0.04  | 2.42 | 8.01  | 2.74  | 9.21   |
| 72555 | 'Shisa9'        | 4.14  | 4.85  | 7.35 | 13.6 | 3.72 | 3.71  | 25   | 7     | 7.17  | 5.65   |
| 72556 | 'Zfp566'        | 2.15  | 4.63  | 0.63 | 15   | 10.2 | 9.06  | 0    | 5.01  | 8.59  | 4.77   |
| 72560 | 'Naalad2'       | 0     | 0     | 0.71 | 0    | 0.28 | 0     | 0.02 | 0     | 0     | 0.54   |
| 72562 | 'Pcbd2'         | 8.87  | 10.17 | 20   | 58.1 | 8.71 | 9.34  | 6.23 | 9.8   | 41.32 | 15.87  |
| 72565 | 'Uaca'          | 0     | 2.02  | 0.01 | 1.68 | 1.16 | 0.87  | 4.24 | 1.1   | 0.01  | 2.1    |
| 72567 | 'Bclaf1'        | 39.38 | 32.49 | 35.8 | 41.8 | 34.9 | 39.41 | 29.3 | 36.89 | 33.06 | 31.36  |
| 72568 | 'Lin9'          | 4.44  | 1.56  | 1.04 | 8.16 | 0.02 | 3.15  | 5.83 | 3.5   | 1.96  | 1.36   |
| 72569 | 'Bbs5'          | 25.81 | 30.22 | 12.9 | 11.6 | 26.7 | 31.92 | 7.58 | 20.55 | 15.78 | 16.21  |
| 72572 | 'Spats2'        | 2.57  | 0.52  | 0.15 | 0.2  | 2.62 | 1.27  | 3.98 | 4.06  | 3.33  | 2.75   |
| 72580 | 'Zup1'          | 2.02  | 5.05  | 8.28 | 6.66 | 15.6 | 21.94 | 17.7 | 7.36  | 15.59 | 4.66   |
| 72584 | 'Cul4b'         | 7.96  | 3.48  | 6.03 | 4.12 | 1.53 | 0.8   | 3.98 | 1.03  | 5.73  | 6.48   |
| 72585 | 'Lypd1'         | 4.4   | 13.37 | 24.4 | 24.7 | 2.98 | 4.37  | 18.1 | 9.73  | 14.86 | 8.1    |
| 72587 | 'Pan3'          | 7.7   | 5.91  | 13.1 | 9.87 | 10.5 | 4.5   | 6.3  | 6.55  | 20.28 | 11.35  |
| 72590 | 'Ppme1'         | 192   | 180.5 | 188  | 116  | 214  | 154.4 | 207  | 186.3 | 214.7 | 204    |
| 72599 | 'Pdia5'         | 1.72  | 2.56  | 0    | 0    | 0.07 | 0.38  | 3.07 | 0.03  | 10.51 | 2.93   |
| 72605 | 'Car10'         | 6.67  | 20.95 | 26.9 | 10.3 | 32.3 | 27.88 | 72.5 | 26.99 | 43.63 | 48.38  |
| 72607 | 'Usp13'         | 6.92  | 9.15  | 6.39 | 6.67 | 3.79 | 2.57  | 4.04 | 9.13  | 9.01  | 3.86   |
| 72611 | 'Zfp655'        | 22.05 | 24.07 | 20.8 | 21.4 | 7.9  | 13.31 | 17.8 | 20.69 | 21.08 | 15.23  |
| 72612 | 'Hpf1'          | 63.64 | 59.86 | 35   | 99   | 86.6 | 76.79 | 90.2 | 70.36 | 59.08 | 57.9   |
| 72614 | 'Pih1d2'        | 3.35  | 3.71  | 0.69 | 0.88 | 2.54 | 1.93  | 1.19 | 1.29  | 0.7   | 4.75   |
| 72615 | 'Anks3'         | 31.39 | 30.54 | 17.5 | 14.5 | 37.8 | 50.98 | 28.6 | 40.73 | 51.74 | 50.91  |
| 72621 | 'Pdzd11'        | 70.13 | 75.21 | 67.7 | 79.1 | 99.5 | 162.9 | 107  | 104.9 | 111.9 | 62.89  |
| 72630 | 'Hspa12b'       | 0.47  | 0.44  | 1.5  | 0.03 | 0.08 | 0     | 8.1  | 1.55  | 1.09  | 4.12   |
| 72632 | 'Smim18'        | 81.48 | 108.2 | 93.8 | 106  | 77.5 | 123.1 | 55.9 | 102.3 | 69.68 | 87.42  |
| 72634 | 'Tdrkh'         | 14.56 | 16.34 | 10.2 | 7.26 | 11.2 | 11.2  | 10.9 | 19.06 | 14.19 | 11.47  |
| 72635 | 'Lins1'         | 2.82  | 4.25  | 6.25 | 9.08 | 7.75 | 2.31  | 8.5  | 1.99  | 1.73  | 4.86   |
| 72640 | 'Mex3a'         | 0.48  | 0.01  | 0.17 | 0    | 0.5  | 0.75  | 0.37 | 1.7   | 0     | 0.42   |
| 72649 | 'Tmem209'       | 15.64 | 19.25 | 6.28 | 32.4 | 15.5 | 4.95  | 9.59 | 12.01 | 18.28 | 36.79  |
| 72650 | '2810006K23Rik' | 9.34  | 5.61  | 17.9 | 0.55 | 5.5  | 9.22  | 12.5 | 5.34  | 8.14  | 3.93   |
| 72654 | 'Ccdc12'        | 94.15 | 84.07 | 63   | 90.3 | 138  | 136.6 | 81.6 | 91.2  | 107.2 | 106.21 |
| 72656 | 'Ints8'         | 3.59  | 3.62  | 2.56 | 7.99 | 2.62 | 1.02  | 8.09 | 5.37  | 2.19  | 6.26   |
| 72657 | 'Selenoh'       | 96.76 | 84.71 | 150  | 57.8 | 50.7 | 103.9 | 111  | 106.6 | 77.84 | 98     |
| 72658 | '2700097O09Rik' | 15.84 | 30.14 | 9.88 | 47.4 | 23.5 | 18.07 | 20.1 | 14.67 | 10.99 | 19.83  |
| 72661 | 'Serp2'         | 174.8 | 117.7 | 217  | 127  | 157  | 124.4 | 170  | 149.1 | 155.3 | 123.36 |
| 72662 | 'Dis3'          | 2.92  | 2.01  | 7.8  | 3.32 | 0.24 | 1.89  | 1.11 | 1.43  | 2.36  | 0.41   |
| 72667 | 'Zfp444'        | 22.38 | 32.09 | 35.3 | 19.1 | 25.3 | 19.96 | 42.9 | 50.36 | 39.84 | 33.47  |

|       |                 |       |       |      |      |      |       |      |       |       |         |
|-------|-----------------|-------|-------|------|------|------|-------|------|-------|-------|---------|
| 72668 | 'Skida1'        | 0.07  | 0.01  | 0.56 | 0    | 1.46 | 0.33  | 0.03 | 1.65  | 1.81  | 0.16    |
| 72672 | 'Zfp518a'       | 0.01  | 0.18  | 0    | 0    | 1.63 | 0.35  | 0.06 | 0.01  | 0.24  | 1.33    |
| 72674 | 'Adipor1'       | 23.22 | 16.48 | 17.1 | 18.6 | 14.8 | 31.97 | 11.7 | 14.15 | 8.5   | 9.18    |
| 72685 | 'Dnajc6'        | 19.69 | 27.62 | 31.1 | 30.3 | 25.5 | 9.72  | 29.4 | 19    | 40.3  | 31.16   |
| 72690 | 'Grp1'          | 0.15  | 0     | 0.22 | 0    | 0.62 | 0     | 0    | 0     | 4.99  | 0.07    |
| 72691 | 'Calhm2'        | 0     | 0     | 3.29 | 0    | 3.61 | 0     | 0    | 0     | 0     | 0       |
| 72692 | 'Hnrnp1l'       | 5.9   | 2.78  | 5.2  | 21.4 | 3.92 | 0.01  | 6.6  | 8.79  | 5.67  | 2.27    |
| 72693 | 'Zcchc12'       | 982.1 | 1034  | 757  | 1033 | 641  | 706.2 | 635  | 1311  | 775.3 | 809.67  |
| 72699 | 'Lime1'         | 12.71 | 14.87 | 23.7 | 3.18 | 19.6 | 8.41  | 21.5 | 12.76 | 12.71 | 13.37   |
| 72701 | 'Zfp618'        | 1.9   | 2.27  | 2.91 | 0.18 | 5.55 | 0     | 10.1 | 1.37  | 0.98  | 0       |
| 72709 | 'C1qtnf6'       | 0     | 0     | 0.59 | 0    | 2.06 | 0     | 0.81 | 0     | 0.06  | 0       |
| 72713 | 'Angptl1'       | 0.04  | 0     | 1.4  | 2    | 0    | 0     | 0    | 0     | 0     | 0       |
| 72720 | 'Zfp248'        | 7.21  | 3.55  | 3.6  | 1.49 | 4.65 | 0.09  | 5.71 | 5.44  | 2.91  | 8.83    |
| 72722 | 'Fam98a'        | 8.18  | 7.09  | 8.28 | 1.45 | 13.2 | 9.83  | 1.83 | 10.46 | 5.34  | 10.72   |
| 72723 | 'Zfp74'         | 7.46  | 4.06  | 4.25 | 0    | 4.98 | 4.99  | 0    | 5.72  | 4.95  | 5.44    |
| 72726 | 'Tbcc'          | 41.89 | 24.69 | 21.3 | 50.6 | 27   | 51.3  | 50.7 | 24.67 | 38.65 | 9.85    |
| 72727 | 'B3gat3'        | 30.18 | 20.16 | 11.9 | 24.6 | 34.2 | 52.08 | 18.2 | 23.25 | 48.83 | 29.39   |
| 72729 | 'Cdc42se2'      | 47.4  | 54.09 | 56.3 | 60.8 | 40.2 | 36.5  | 65.6 | 65.26 | 42.2  | 56.35   |
| 72736 | 'Tmx1'          | 82.14 | 98.05 | 82.2 | 98.7 | 42.8 | 60.3  | 38.4 | 91.21 | 128.1 | 123.33  |
| 72739 | 'Zkscan3'       | 10.04 | 18.65 | 15.6 | 5.05 | 1.89 | 10.69 | 7.3  | 6.53  | 10.35 | 21.21   |
| 72745 | 'Tmem161b'      | 8.28  | 3.8   | 6.78 | 5.85 | 3.09 | 3.15  | 4.62 | 10.68 | 9.03  | 8.22    |
| 72747 | 'Ttc39c'        | 6.53  | 4.31  | 4.06 | 9.09 | 1.67 | 10.06 | 0.02 | 1.07  | 0.36  | 3.43    |
| 72748 | 'Hdhd3'         | 7.78  | 3.43  | 0.09 | 10.9 | 38.2 | 25.05 | 6.81 | 16.78 | 27.82 | 15.17   |
| 72749 | 'Tonsl'         | 1.82  | 2.65  | 4.06 | 0.01 | 1.18 | 7.81  | 7.09 | 2.51  | 8.88  | 4.3     |
| 72750 | 'Fam117b'       | 1.73  | 8.59  | 4.11 | 14.6 | 2.24 | 2.11  | 4.94 | 4.04  | 4.56  | 4.48    |
| 72754 | 'Arhgef10l'     | 0.72  | 2.16  | 6.75 | 0.03 | 5.56 | 1.11  | 4.85 | 1.49  | 1.63  | 2.96    |
| 72759 | 'Tmem135'       | 12.63 | 22.87 | 29.6 | 7.44 | 19.1 | 14.52 | 23.4 | 16.21 | 24.85 | 32.26   |
| 72772 | 'Rint1'         | 12.36 | 5.89  | 12.6 | 6.36 | 6.65 | 6.41  | 10   | 4.41  | 5.57  | 7.82    |
| 72774 | 'Neil1'         | 0.04  | 11.46 | 3.22 | 8.38 | 4.34 | 11.22 | 10.8 | 8.44  | 11.06 | 5.91    |
| 72775 | 'Fance'         | 6.85  | 4.81  | 10.4 | 4.09 | 1.96 | 7.08  | 4.54 | 1.97  | 2.28  | 3.98    |
| 72776 | 'Sass6'         | 1.98  | 0.9   | 0.36 | 2.04 | 3.07 | 1.3   | 0.41 | 0.79  | 1.25  | 1.25    |
| 72780 | 'Rspo3'         | 0     | 8.29  | 1.18 | 0    | 0.31 | 0.82  | 0    | 0     | 5.48  | 7.13    |
| 72787 | 'Ndc1'          | 1.06  | 8.65  | 1.56 | 5.85 | 2.41 | 7.64  | 6.53 | 5.33  | 0.07  | 4.59    |
| 72789 | 'Veph1'         | 0.05  | 0.23  | 0.19 | 0.3  | 0.2  | 0.16  | 0.13 | 0.12  | 0.23  | 0.16    |
| 72792 | '2810459M11Rik' | 0.81  | 3.07  | 2.41 | 5.9  | 0.25 | 0     | 2.6  | 2.33  | 3.54  | 0       |
| 72795 | 'Ttc19'         | 7.91  | 17.8  | 3.38 | 10.8 | 9.12 | 2.73  | 10.1 | 10.5  | 12.63 | 5.75    |
| 72805 | 'Zfp839'        | 0.43  | 0.3   | 0.2  | 0.03 | 1.23 | 0.03  | 0    | 1.69  | 1.03  | 0.95    |
| 72807 | 'Zfp429'        | 0     | 0     | 3.3  | 0    | 0    | 0     | 0    | 0     | 3.99  | 0       |
| 72821 | 'Scn2b'         | 105.3 | 98.01 | 88.4 | 68.8 | 100  | 98.61 | 110  | 113.5 | 95.41 | 74.6    |
| 72823 | 'Pard3b'        | 0.03  | 0.45  | 0.01 | 0    | 1.83 | 0     | 0    | 0     | 1.07  | 0       |
| 72825 | 'Mon1a'         | 17.17 | 6.44  | 7.01 | 4.15 | 13.5 | 12.29 | 13.5 | 11.72 | 10.97 | 6.82    |
| 72826 | 'Fam76b'        | 2.66  | 2.46  | 2.87 | 3.45 | 0.37 | 0.48  | 3.22 | 0.63  | 8.32  | 1.06    |
| 72828 | 'Ubash3b'       | 3.47  | 0.54  | 0.41 | 0.02 | 7.31 | 2.27  | 2.02 | 8.64  | 3.13  | 2.86    |
| 72831 | 'Dhx30'         | 28.8  | 42.35 | 46.4 | 21   | 14.7 | 20.13 | 27.6 | 28    | 27.98 | 34.22   |
| 72832 | 'Crtac1'        | 36.42 | 11    | 15   | 30   | 9.87 | 19.45 | 36.2 | 13.47 | 12.9  | 9.38    |
| 72836 | 'Pot1b'         | 0.8   | 1.71  | 1.02 | 3.4  | 2.43 | 0.76  | 1.43 | 0.8   | 1.28  | 2.26    |
| 72843 | 'Prdm4'         | 1.97  | 3.67  | 2.87 | 2.55 | 0.01 | 0.02  | 8.25 | 6.16  | 1.04  | 0       |
| 72844 | 'Kctd17'        | 10.4  | 13.2  | 21.2 | 8.89 | 35.2 | 20.75 | 9.79 | 15.63 | 15.9  | 9.01    |
| 72852 | 'Mblac2'        | 29.27 | 30.5  | 35.2 | 25   | 13.8 | 27.18 | 37.8 | 30.58 | 28.48 | 18.22   |
| 72865 | 'Rtl8c'         | 966.9 | 781.4 | 881  | 1009 | 839  | 1254  | 1041 | 1126  | 920.1 | 1326.96 |
| 72873 | 'Bbof1'         | 0.93  | 4.51  | 4.2  | 3.48 | 5.2  | 12.43 | 2.9  | 2.9   | 4.98  | 2.28    |
| 72881 | 'Zdhhc4'        | 28.81 | 12.15 | 51.7 | 14.5 | 29.1 | 30.9  | 55.7 | 31.73 | 16.2  | 26.81   |
| 72886 | 'Yju2'          | 12.95 | 14.53 | 9.08 | 20.3 | 6.8  | 20.32 | 5.61 | 15.12 | 0.7   | 8.64    |
| 72895 | 'Setd5'         | 8.43  | 7.41  | 5.24 | 5.25 | 7.06 | 4.92  | 8.89 | 6.24  | 4.97  | 8.15    |
| 72898 | 'Asphd2'        | 20.94 | 20.26 | 6.06 | 11   | 15.8 | 28.17 | 12.3 | 20.13 | 13.41 | 3.62    |
| 72899 | 'Macrod2'       | 7.1   | 9.93  | 9.61 | 12.8 | 10.6 | 5.67  | 10.9 | 15.77 | 5.55  | 3.16    |
| 72900 | 'Ndufv2'        | 318.6 | 272.5 | 303  | 271  | 324  | 393.7 | 372  | 366   | 312.1 | 329.87  |
| 72902 | 'Spock3'        | 179.1 | 60.34 | 52.4 | 49.5 | 42   | 42.9  | 39.5 | 117.5 | 46.4  | 95.85   |

|       |                 |       |       |      |      |      |       |      |       |       |        |
|-------|-----------------|-------|-------|------|------|------|-------|------|-------|-------|--------|
| 72925 | 'March1'        | 22.52 | 19.83 | 15.3 | 9.79 | 11.7 | 5.46  | 7.36 | 5.66  | 11.94 | 13.6   |
| 72927 | 'Hepacam'       | 23.18 | 15.43 | 33.7 | 7.28 | 9.38 | 23.74 | 10   | 11.09 | 8.1   | 7.04   |
| 72930 | 'Ppp2r2b'       | 63.05 | 75.86 | 48.5 | 64.9 | 49.6 | 64.43 | 85.3 | 101.2 | 97.23 | 85.75  |
| 72931 | 'Swi5'          | 545.4 | 476.8 | 470  | 730  | 515  | 701.9 | 602  | 539.6 | 496.5 | 512.6  |
| 72935 | 'Ddx41'         | 43.53 | 17.19 | 7.38 | 16.9 | 19.5 | 22.85 | 17.4 | 19.8  | 21.9  | 14.37  |
| 72938 | 'Hspb11'        | 29.06 | 27.15 | 22.6 | 39.7 | 34.9 | 53.22 | 37.3 | 30.42 | 35.71 | 40.75  |
| 72946 | 'Lrrc47'        | 0.23  | 2.32  | 3.32 | 4.89 | 0.48 | 0     | 5.53 | 1.34  | 12.55 | 0.02   |
| 72947 | 'Phykp1'        | 5.72  | 1.75  | 3.54 | 11.8 | 4.98 | 22.71 | 0    | 9.9   | 3.99  | 12.65  |
| 72948 | 'Tppp'          | 35.68 | 28.95 | 52.3 | 32.1 | 25.7 | 8.75  | 79.2 | 17.59 | 35.76 | 46.04  |
| 72949 | 'Ccmt2'         | 7.27  | 12.85 | 9    | 6.36 | 9.27 | 4.75  | 11.1 | 7.64  | 6.89  | 12.89  |
| 72958 | 'Zfp493'        | 0.29  | 0.01  | 0.32 | 0    | 0    | 0.45  | 0.26 | 1.56  | 0.13  | 0.76   |
| 72960 | 'Top1mt'        | 14.21 | 30.54 | 21   | 18.6 | 17.5 | 23.58 | 30.3 | 21.09 | 15    | 33.01  |
| 72961 | 'Slc17a7'       | 0     | 0     | 0.02 | 0.44 | 0    | 0     | 0    | 0.46  | 0.19  | 0.01   |
| 72962 | 'Tymp'          | 2.21  | 1.26  | 1.9  | 1.66 | 1.72 | 2.46  | 1.33 | 1.3   | 3.23  | 1.25   |
| 72972 | 'Ccser2'        | 6.61  | 11.97 | 11.6 | 7.23 | 11.5 | 8.81  | 6.89 | 8.21  | 5.83  | 5.41   |
| 72973 | 'Fbxo47'        | 0     | 0     | 0    | 0.19 | 0    | 0     | 0    | 0     | 1.11  | 1.85   |
| 72978 | 'Cnih3'         | 6.43  | 0     | 0    | 0    | 0.42 | 0     | 0    | 1.42  | 5.99  | 0      |
| 72981 | 'Thap12'        | 2.34  | 1.51  | 5.44 | 5.75 | 1.13 | 4.61  | 3.61 | 3.72  | 1.39  | 2.85   |
| 72982 | 'Tmem138'       | 29.79 | 32.52 | 21   | 35.5 | 18.8 | 38.8  | 22.3 | 29.7  | 24.75 | 41.69  |
| 72993 | 'Appl1'         | 33.14 | 21.38 | 21   | 14.7 | 25.8 | 20.84 | 28.2 | 19.69 | 25.17 | 20.88  |
| 72999 | 'Insig2'        | 41.54 | 38.25 | 32.6 | 37.3 | 40.2 | 60.7  | 26.8 | 47.45 | 49.08 | 54.8   |
| 73010 | 'Gpr22'         | 5.33  | 4.42  | 5.76 | 0    | 5.96 | 2.12  | 4.58 | 5.59  | 3.08  | 11.47  |
| 73016 | 'Kremen2'       | 0     | 3.32  | 7.56 | 1.92 | 0    | 8.73  | 0    | 1.45  | 3.63  | 0.92   |
| 73024 | 'Emc7'          | 207.8 | 242.2 | 188  | 148  | 172  | 218.2 | 188  | 233.1 | 226.8 | 278.96 |
| 73032 | 'Ttc9b'         | 38.78 | 16.74 | 57.4 | 90   | 80.2 | 14.17 | 46.2 | 29.05 | 63.04 | 33.9   |
| 73046 | 'Glrx5'         | 20.57 | 16.73 | 28   | 48.3 | 12.8 | 17.51 | 28.5 | 16.32 | 50.69 | 14.37  |
| 73047 | 'Camk2n2'       | 8.58  | 8.99  | 7.54 | 3.41 | 13.2 | 7.04  | 11.4 | 5.5   | 8.28  | 5.71   |
| 73061 | 'Cldn34c1'      | 1.5   | 0.17  | 0.22 | 3.18 | 5.73 | 1.41  | 1.91 | 1.41  | 1.04  | 0.32   |
| 73062 | 'Ppp1r16a'      | 31.47 | 9.98  | 43.7 | 6.45 | 24.3 | 9.8   | 16.3 | 15.17 | 29.81 | 13.46  |
| 73067 | 'Tmem192'       | 29.74 | 9.04  | 19.9 | 54.1 | 37   | 28.88 | 21.8 | 44.98 | 65.17 | 19.26  |
| 73068 | 'Fut11'         | 6.12  | 5.33  | 8.88 | 10.2 | 4.83 | 2.29  | 9.44 | 5.04  | 10.01 | 6.04   |
| 73072 | 'Prr36'         | 6.16  | 4.4   | 9.46 | 20.9 | 6.4  | 8.91  | 8.06 | 6.53  | 2.35  | 2.64   |
| 73075 | 'Ppil6'         | 1.86  | 14.51 | 3.62 | 0.05 | 10.8 | 8.29  | 7.28 | 7.2   | 5.22  | 6.32   |
| 73078 | 'Pmpcb'         | 56.26 | 49.55 | 42.4 | 77.3 | 62.3 | 48.69 | 35.3 | 61.07 | 33.8  | 39.06  |
| 73086 | 'Rps6ka5'       | 1.41  | 0.1   | 0.09 | 0    | 1.36 | 0.12  | 0.28 | 0.74  | 0.36  | 0.02   |
| 73094 | 'Sgip1'         | 14.58 | 13.36 | 15.1 | 7.47 | 16.7 | 10.43 | 15.9 | 11.7  | 25.18 | 13.69  |
| 73095 | 'Slc25a42'      | 10.34 | 5.62  | 9.17 | 4.42 | 11.4 | 5.61  | 8.79 | 14.32 | 8.72  | 6.15   |
| 73102 | 'Slc22a23'      | 1.34  | 1.53  | 1.44 | 0.03 | 1.64 | 2.66  | 2.3  | 1.5   | 2.58  | 0.77   |
| 73103 | '3110009E18Rik' | 2.96  | 9.9   | 4.61 | 3.67 | 0.1  | 12.98 | 4.88 | 1.57  | 8.33  | 8.8    |
| 73106 | 'Prss57'        | 0     | 0     | 0    | 1.29 | 4.33 | 0     | 0    | 0.53  | 0     | 1.62   |
| 73112 | 'Abracl'        | 8.58  | 6.05  | 5.21 | 7.15 | 12.1 | 20.45 | 12   | 12.86 | 13.37 | 15     |
| 73121 | 'Rflna'         | 0     | 0     | 3.09 | 3.73 | 2.05 | 0     | 0    | 0     | 0     | 0      |
| 73122 | 'Tgfbrap1'      | 2.15  | 0.88  | 0.3  | 1.26 | 2.86 | 1.1   | 0.56 | 0.42  | 1.71  | 0.26   |
| 73124 | 'Golim4'        | 0.07  | 2.08  | 3.73 | 0    | 1.58 | 1.48  | 2.79 | 0.7   | 0.44  | 1.4    |
| 73130 | 'Tmed5'         | 21.24 | 33.28 | 11.1 | 8.98 | 9.9  | 22.66 | 24.8 | 12.11 | 18.01 | 27.27  |
| 73132 | 'Slc25a16'      | 0.1   | 0     | 0    | 10.7 | 2.64 | 0.08  | 1.97 | 0.07  | 6.22  | 0.2    |
| 73137 | 'Prrc1'         | 5.87  | 4.42  | 6.88 | 8.59 | 3.11 | 4.11  | 1.86 | 5.4   | 10.34 | 5.75   |
| 73139 | 'Cenpv'         | 9.98  | 3.5   | 1.97 | 8.59 | 3.81 | 4.95  | 0.05 | 1.86  | 1.42  | 2.65   |
| 73149 | 'Clec4a3'       | 0     | 0     | 0    | 0    | 0    | 3.54  | 0    | 0     | 0     | 0      |
| 73158 | 'Larp1'         | 7.15  | 3.32  | 3.73 | 4.57 | 6.11 | 2.57  | 5.25 | 3.49  | 4.78  | 3.39   |
| 73162 | 'Otud3'         | 0     | 0.14  | 1.68 | 4.99 | 0    | 0     | 0    | 0     | 0.03  | 0      |
| 73166 | 'Tm7sf2'        | 7.83  | 6.45  | 15.2 | 0.04 | 20.2 | 8.43  | 22.5 | 24.24 | 5.06  | 13.83  |
| 73167 | 'Arhgap8'       | 0     | 0     | 0    | 0    | 0    | 0     | 5    | 0     | 3.63  | 0      |
| 73172 | 'Exo5'          | 3.64  | 6.25  | 1.45 | 0    | 5.19 | 8.41  | 13.6 | 2.02  | 9.05  | 12.21  |
| 73173 | 'Pcdh18'        | 0.03  | 6.45  | 2.3  | 0.01 | 2.48 | 0     | 13.1 | 3.79  | 3.43  | 2.14   |
| 73174 | 'Tbkbp1'        | 3.43  | 0.53  | 1.58 | 5.23 | 0.5  | 1.46  | 3.62 | 0.75  | 3.58  | 1.16   |
| 73176 | '3110040M04Rik' | 0     | 0     | 0    | 4.36 | 0    | 0     | 0.26 | 0     | 0     | 1.13   |
| 73178 | 'Wasl'          | 19.01 | 19.27 | 23.6 | 26.4 | 20.1 | 31.55 | 12.7 | 12.14 | 16.43 | 7.38   |

|        |                   |       |       |      |      |      |       |      |       |       |       |
|--------|-------------------|-------|-------|------|------|------|-------|------|-------|-------|-------|
| 73181  | 'Nfatc4'          | 0     | 0     | 0    | 0    | 0    | 0     | 0    | 0     | 0     | 0.77  |
| 73182  | 'Pear1'           | 0     | 0.16  | 0    | 0    | 0    | 0     | 0    | 0     | 0     | 0     |
| 73191  | 'Fezf1'           | 22.34 | 7.21  | 0.02 | 0.02 | 23.6 | 38.29 | 33.7 | 0.11  | 3.36  | 11.82 |
| 73192  | 'Xpot'            | 8.99  | 10.39 | 9.2  | 2.71 | 4.94 | 3.45  | 6.36 | 5.68  | 7.56  | 8.69  |
| 73205  | 'C9orf72'         | 7.45  | 8.49  | 8.05 | 3.79 | 14.6 | 9.74  | 22.4 | 18.74 | 10.51 | 14.58 |
| 73212  | '3110082I17Rik'   | 46.88 | 23.93 | 21.4 | 28.5 | 31.5 | 29.65 | 20.3 | 21.03 | 25.22 | 20.92 |
| 73218  | 'Sppl2b'          | 15.32 | 8.59  | 23   | 10.1 | 8.04 | 12.96 | 18.2 | 13.34 | 0.21  | 4.18  |
| 73225  | 'Fam118a'         | 22.31 | 20.66 | 9.86 | 59.9 | 34.2 | 15.78 | 21.7 | 24.2  | 12.88 | 23.58 |
| 73229  | 'Zfp983'          | 8.57  | 5.35  | 10.1 | 0.01 | 11.2 | 10.27 | 5.98 | 10.88 | 11.02 | 13.13 |
| 73230  | 'Bmper'           | 0.19  | 0     | 8.33 | 0    | 0.01 | 0.4   | 2.88 | 2.36  | 5.86  | 0     |
| 73233  | 'Zfp942'          | 2.93  | 3.44  | 4.47 | 5.91 | 3.38 | 0.8   | 7.67 | 5.55  | 9.69  | 8.28  |
| 73234  | 'Snorc'           | 0     | 0     | 0    | 0    | 0    | 0     | 0    | 0     | 0     | 0.21  |
| 73242  | 'Atat1'           | 54.01 | 35.76 | 57   | 68.5 | 54   | 57.38 | 43.4 | 56.51 | 40.17 | 40.15 |
| 73246  | 'Rassf6'          | 0     | 0     | 0    | 0    | 4.54 | 7.1   | 0    | 0     | 2.24  | 0.84  |
| 73247  | 'Mrgbp'           | 5.44  | 0.97  | 10.8 | 9.49 | 1.73 | 0.68  | 0.11 | 7.84  | 4.94  | 0.02  |
| 73251  | 'Setd7'           | 0.98  | 0.96  | 1.05 | 2.21 | 1.68 | 0.07  | 0.16 | 0.4   | 0.73  | 0.41  |
| 732521 | 'Gt(pU21)140Imeg' | 0     | 0.04  | 0.01 | 0.06 | 0.01 | 1.28  | 0    | 0     | 0.02  | 0.06  |
| 73254  | 'Ccdc18'          | 0     | 0     | 0.37 | 0    | 1.34 | 0     | 0    | 0     | 0     | 0     |
| 73259  | 'Cib4'            | 0     | 0     | 0.07 | 0    | 0    | 0     | 0    | 0     | 0     | 0     |
| 73261  | '1700037C18Rik'   | 8.09  | 7.21  | 12.9 | 9.01 | 10   | 24.35 | 10.7 | 9.53  | 20.65 | 26.18 |
| 73274  | 'Gbbp1'           | 32.01 | 41.33 | 18.8 | 23.5 | 20.9 | 14.39 | 41.5 | 25.51 | 29.72 | 28.22 |
| 73284  | 'Ddit4l'          | 1.67  | 2.03  | 0    | 0    | 0    | 0     | 0    | 0     | 0     | 0.02  |
| 73287  | 'Cabco1'          | 6.68  | 2.58  | 0    | 0.05 | 3.54 | 0     | 4.84 | 2.32  | 0     | 2.4   |
| 73288  | 'Vps50'           | 15.71 | 23.1  | 22.2 | 22.8 | 19.9 | 6.92  | 33.4 | 15.47 | 20.77 | 30.69 |
| 73293  | 'Ccdc103'         | 1.87  | 2.55  | 4.3  | 2.39 | 5.66 | 4.92  | 4.7  | 4.59  | 7     | 3.26  |
| 73296  | 'Rhobtb3'         | 1.58  | 0.74  | 1.88 | 1.61 | 3.86 | 1.19  | 2.77 | 2.13  | 3.33  | 1.14  |
| 73314  | 'Lrrc69'          | 1.02  | 1.39  | 1.14 | 1.78 | 1.51 | 1.17  | 0.46 | 0.89  | 1.57  | 0.86  |
| 73316  | 'Calr3'           | 4.81  | 3.07  | 4.35 | 0    | 0.92 | 0.81  | 0    | 2.02  | 2.3   | 6.93  |
| 73318  | 'Ube2d2b'         | 0     | 0     | 0    | 0    | 0    | 0     | 0    | 0     | 0     | 0.13  |
| 73324  | 'Clhc1'           | 0     | 0.02  | 0.13 | 0.08 | 0    | 0     | 0    | 0     | 0     | 0     |
| 73327  | 'Pradc1'          | 0     | 9.15  | 7.49 | 0    | 16.9 | 0     | 15.8 | 6.66  | 0     | 0.05  |
| 73332  | 'Ccdc30'          | 19.22 | 20.75 | 23.7 | 17.1 | 14.1 | 32.67 | 8.07 | 12.31 | 8.53  | 13.23 |
| 73338  | 'Itpril1'         | 0     | 0     | 10.6 | 2.46 | 1.02 | 3.73  | 0    | 2.19  | 4.18  | 1.36  |
| 73340  | 'Nptxr'           | 1.81  | 0.6   | 0    | 0    | 0.64 | 1.42  | 0.1  | 0.55  | 0.07  | 0     |
| 73341  | 'Arhgef6'         | 0     | 0.85  | 4.93 | 3.2  | 1.42 | 0.15  | 3.13 | 2.21  | 0.01  | 1.6   |
| 73363  | '1700056E22Rik'   | 0     | 0     | 0    | 0    | 0    | 0     | 4.78 | 0     | 0     | 0     |
| 73368  | 'Col20a1'         | 0     | 0     | 0    | 0.22 | 0.01 | 0.03  | 1.26 | 0     | 0     | 0.01  |
| 73373  | 'Phospho2'        | 20.07 | 39.03 | 13.5 | 36.9 | 17.1 | 23.66 | 12.9 | 22.98 | 24.66 | 39.56 |
| 73379  | 'Dcbl2'           | 1.38  | 1.86  | 0.03 | 1.49 | 1.86 | 1.28  | 4.45 | 0.39  | 0.3   | 0.1   |
| 73381  | 'Cmtm2a'          | 0.17  | 0     | 0    | 0    | 0.8  | 0     | 0    | 0     | 0     | 0.41  |
| 73385  | 'Fam177a'         | 37.37 | 39.97 | 30.8 | 25.4 | 27   | 26.81 | 25.2 | 28.63 | 27.96 | 16.73 |
| 73389  | 'Hbp1'            | 14.69 | 17.74 | 16.7 | 31.5 | 15.6 | 18.85 | 24.9 | 9.37  | 14.94 | 36.15 |
| 73390  | 'Msl3l2'          | 1.46  | 3.14  | 3.37 | 10.7 | 5.61 | 0.23  | 7.67 | 3.56  | 3.26  | 9.57  |
| 73398  | 'Nipsnap3a'       | 0     | 0     | 0    | 0.11 | 0    | 0     | 0    | 0     | 0     | 0     |
| 73407  | 'Tepp'            | 5.28  | 1.11  | 5.43 | 3.88 | 1.63 | 6.54  | 0    | 3.63  | 0     | 0.08  |
| 73410  | '1700065D16Rik'   | 0     | 0.1   | 0    | 0    | 0.1  | 1.68  | 0    | 0     | 0.28  | 0     |
| 73419  | 'Armt1'           | 6.14  | 5.84  | 9.9  | 6.87 | 0.09 | 11.43 | 32.6 | 6.93  | 4.16  | 3.11  |
| 73420  | 'Ccsap'           | 1.95  | 3.11  | 1.95 | 2.43 | 1.34 | 0.51  | 0.71 | 1.35  | 0.45  | 0.21  |
| 73422  | 'Prox2'           | 0.05  | 0.04  | 0    | 0    | 0.53 | 0     | 0    | 0     | 0.03  | 1.29  |
| 73430  | 'Zfp974'          | 1     | 0.14  | 0.1  | 2.49 | 1.45 | 1.96  | 0.3  | 1.53  | 1.71  | 2.29  |
| 73442  | 'Hspa12a'         | 6.78  | 7.88  | 18.2 | 10.9 | 8.01 | 7.64  | 28.4 | 15.33 | 6.55  | 7.42  |
| 73447  | 'Wdr13'           | 7.85  | 14.11 | 16.8 | 20.1 | 14.1 | 5.13  | 11.8 | 7.55  | 24.68 | 17.27 |
| 73449  | '1700066B19Rik'   | 0     | 0     | 0.04 | 0    | 3.09 | 4.06  | 0    | 0.49  | 1.31  | 3.05  |
| 73451  | 'Zfp763'          | 8     | 1.53  | 8.48 | 10.4 | 7.49 | 1.42  | 0.03 | 14.05 | 5.55  | 5.28  |
| 73453  | '1700067K01Rik'   | 0     | 0.4   | 0    | 0    | 0    | 0.04  | 0    | 0.08  | 0     | 0     |
| 73458  | 'Aldh3b3'         | 0     | 0.42  | 0    | 0    | 0    | 0     | 0    | 0     | 0     | 0     |
| 73467  | '1700066M21Rik'   | 9.53  | 8.59  | 8.68 | 4.56 | 4.67 | 4.21  | 24.8 | 4.01  | 14.57 | 2.66  |
| 73469  | 'Rnf38'           | 2.45  | 1.97  | 2.97 | 1.08 | 4.49 | 1.12  | 0.77 | 1.91  | 5.07  | 5.05  |

|       |                 |       |       |      |      |      |       |      |       |       |        |
|-------|-----------------|-------|-------|------|------|------|-------|------|-------|-------|--------|
| 73470 | 'Kif2b'         | 0     | 0     | 1.25 | 0    | 0    | 0     | 0    | 0     | 0     | 0      |
| 73473 | 'lws1'          | 13.39 | 7.86  | 9.62 | 23.4 | 7.36 | 18.31 | 7.76 | 8.77  | 8.9   | 5.88   |
| 73490 | 'Mipol1'        | 2.07  | 2.74  | 5.18 | 0    | 6.89 | 1.7   | 3.2  | 3.97  | 5.6   | 0.33   |
| 73523 | 'Pebp4'         | 1.67  | 0     | 0    | 0    | 0    | 0.3   | 0    | 0     | 2.23  | 0      |
| 73526 | 'Speer4b'       | 0     | 0.2   | 0    | 0    | 1.3  | 0.09  | 0    | 0.32  | 0.02  | 0.16   |
| 73533 | '1700080G18Rik' | 0     | 0.6   | 0    | 0    | 2.11 | 0     | 0    | 0     | 0.6   | 0      |
| 73545 | '1700094D03Rik' | 2.83  | 5.21  | 3.26 | 0.1  | 0.64 | 3.66  | 2.28 | 1.72  | 6.08  | 0.55   |
| 73569 | 'Vgll3'         | 0     | 0     | 0    | 0    | 0    | 0     | 0    | 0.69  | 0     | 0.01   |
| 73582 | 'Camkmt'        | 21.39 | 28.27 | 21.7 | 3.55 | 20.1 | 17.31 | 10.2 | 19.2  | 31.71 | 42.63  |
| 73598 | '1700001O22Rik' | 0     | 0     | 2.41 | 0    | 1.1  | 4.62  | 3.03 | 3.01  | 6.31  | 4.32   |
| 73603 | 'Trp53tg5'      | 0     | 0.32  | 0    | 0    | 1.53 | 0     | 0.02 | 0     | 0.71  | 0      |
| 73608 | 'Marveld3'      | 0     | 2.23  | 0    | 0    | 1.94 | 0     | 1.87 | 0.65  | 4.78  | 0      |
| 73610 | 'Zfp433'        | 5.28  | 1.98  | 0    | 8.28 | 9.65 | 0     | 0    | 6.82  | 0.7   | 4.44   |
| 73634 | '1700125H20Rik' | 0.01  | 0     | 1.3  | 0.04 | 0.02 | 0.03  | 0.86 | 0.01  | 0.04  | 0.02   |
| 73635 | 'Ptges3l'       | 2.94  | 1.5   | 0.38 | 1.66 | 0.03 | 2.69  | 8.51 | 3.88  | 4.17  | 4.62   |
| 73647 | 'Capn9'         | 0     | 0     | 0    | 0    | 0    | 0     | 0    | 0.08  | 0     | 0      |
| 73649 | 'Cybrd1'        | 0.21  | 0.43  | 0.42 | 0.72 | 0.26 | 0.4   | 0.38 | 0.15  | 0.3   | 0.26   |
| 73656 | 'Ms4a6c'        | 4.29  | 1.72  | 3.59 | 3.45 | 3.03 | 1.89  | 0.8  | 0.82  | 1.95  | 1.1    |
| 73658 | 'Spns1'         | 22.33 | 33.36 | 48.4 | 6.4  | 27.8 | 36.31 | 29.7 | 34.64 | 24.61 | 24.49  |
| 73660 | 'Cabp4'         | 0     | 2.01  | 0    | 0    | 0    | 0     | 0    | 0     | 0     | 0.3    |
| 73666 | 'Thoc3'         | 63.62 | 40.17 | 37.1 | 89.5 | 49   | 54.14 | 50.5 | 40.37 | 39.73 | 44.43  |
| 73667 | '2410004P03Rik' | 0.03  | 13.66 | 3.54 | 6.12 | 3.25 | 0     | 0.06 | 5.72  | 0.02  | 2.35   |
| 73668 | 'Ttc21b'        | 5.32  | 4.17  | 5.31 | 0    | 6.67 | 5.38  | 0.4  | 4.33  | 2.98  | 2.4    |
| 73671 | 'Sult6b1'       | 0     | 0     | 0    | 0    | 0    | 0.02  | 0    | 0     | 0.02  | 0      |
| 73673 | 'Rec114'        | 0     | 0     | 6.09 | 2.07 | 2.27 | 0     | 5.22 | 0     | 0     | 0      |
| 73674 | 'Wdr75'         | 13.3  | 10.97 | 17.7 | 17.9 | 24   | 21.51 | 8.79 | 32.23 | 35.28 | 19.11  |
| 73677 | 'Psm8'          | 0.34  | 0     | 0    | 0    | 0    | 0     | 0    | 0     | 0     | 0      |
| 73680 | 'Zbtb8a'        | 3.16  | 0     | 0.94 | 0.08 | 1.23 | 0     | 0.29 | 0.05  | 2.44  | 4.07   |
| 73681 | 'Trmt11'        | 11.07 | 5.91  | 5.47 | 10.4 | 8.23 | 9.64  | 4.87 | 11.48 | 14.11 | 8.66   |
| 73683 | 'Atg16l2'       | 10.98 | 14.08 | 29.4 | 18.5 | 12   | 33.6  | 20.1 | 21.06 | 10.42 | 27.55  |
| 73689 | 'Bloc1s2'       | 125.7 | 95.81 | 90   | 53.4 | 63.1 | 114.6 | 108  | 113.8 | 78.94 | 91.24  |
| 73690 | 'Glipr1'        | 0     | 0.1   | 0    | 0    | 0.06 | 7.37  | 0    | 1.51  | 0     | 0      |
| 73692 | 'Cplane1'       | 2.57  | 3.07  | 3.48 | 9.88 | 4.11 | 2.87  | 0.58 | 3.35  | 3.09  | 5.39   |
| 73694 | 'Ndufaf7'       | 39.85 | 54.37 | 36.5 | 33.6 | 34   | 47.78 | 58.6 | 54.88 | 61.02 | 46.58  |
| 73699 | 'Ppp2r1b'       | 4.24  | 2.56  | 13.6 | 6.46 | 0    | 0.06  | 2.97 | 1.26  | 11.97 | 1.1    |
| 73703 | 'Dppa2'         | 0     | 0     | 0    | 0    | 0    | 1.08  | 0    | 0     | 0     | 0      |
| 73707 | 'Gucy2g'        | 0     | 0.61  | 0    | 0    | 0    | 0     | 0    | 0     | 0     | 0      |
| 73710 | 'Tubb2b'        | 46.45 | 32.9  | 47.4 | 14.1 | 39.3 | 48.42 | 37.1 | 48.16 | 44.26 | 44.09  |
| 73711 | 'Mvb12a'        | 71.26 | 33.68 | 63.9 | 54.8 | 46.2 | 66.05 | 44   | 44.27 | 47.07 | 43.71  |
| 73712 | 'Dmkn'          | 0     | 6.14  | 0    | 10   | 0    | 0     | 0    | 5.36  | 0     | 0      |
| 73713 | 'Rbm20'         | 1.75  | 0.17  | 0.04 | 0.02 | 0.94 | 0.01  | 0    | 0.01  | 0.01  | 0.01   |
| 73720 | 'Cst6'          | 3.16  | 2.53  | 2.82 | 0    | 2.09 | 2.35  | 5.12 | 0.56  | 3.51  | 4.67   |
| 73721 | '1110017D15Rik' | 31.57 | 24.05 | 2.88 | 61.7 | 10.4 | 42.12 | 10.5 | 14.95 | 26.77 | 13.1   |
| 73723 | 'Sh3bgrl3'      | 291   | 276.5 | 263  | 249  | 372  | 530.3 | 386  | 345.9 | 241.2 | 270.67 |
| 73724 | 'Mcee'          | 67.43 | 54.14 | 59.1 | 121  | 58.1 | 48.09 | 11.2 | 53.78 | 22.79 | 41.3   |
| 73728 | 'Psd'           | 31.92 | 26.03 | 20.5 | 24.8 | 19.5 | 20.07 | 34.4 | 11.99 | 22.56 | 4.66   |
| 73729 | 'Zfp383'        | 7.2   | 1.55  | 5.72 | 0    | 3.36 | 3.41  | 3.63 | 5.13  | 7.26  | 6.14   |
| 73730 | 'Lce1l'         | 0     | 1.84  | 0    | 0    | 0    | 0     | 0    | 0     | 0     | 0      |
| 73736 | 'Fcf1'          | 35.1  | 51.25 | 36.8 | 117  | 63.4 | 84.5  | 42.7 | 47.42 | 55.59 | 66.95  |
| 73737 | '1110008P14Rik' | 142.7 | 121.5 | 117  | 144  | 106  | 103.6 | 66.8 | 154   | 127.9 | 175.6  |
| 73738 | 'Haus7'         | 13.57 | 13.95 | 16.9 | 24.4 | 10.9 | 1.45  | 6.64 | 30.73 | 11.35 | 24.03  |
| 73739 | 'Cby1'          | 97.63 | 53.33 | 43.9 | 51.3 | 80.7 | 93.33 | 59.4 | 94.78 | 44.62 | 59.62  |
| 73744 | 'Man2c1'        | 8.65  | 22.91 | 25.6 | 33.4 | 23.3 | 2.84  | 16.3 | 8.65  | 20.18 | 14.08  |
| 73747 | 'Shld1'         | 6.34  | 6.48  | 4.85 | 0    | 10.6 | 4.17  | 25.9 | 0.04  | 24.34 | 7.92   |
| 73750 | 'Whrn'          | 8.66  | 0.35  | 1.12 | 0    | 8.98 | 0.01  | 4.16 | 5.86  | 3.32  | 0.51   |
| 73754 | 'Thap1'         | 8.93  | 1.95  | 1.9  | 2.6  | 7.76 | 6.99  | 6.75 | 7.71  | 3.56  | 2.1    |
| 73804 | 'Kif2c'         | 0     | 0     | 0.46 | 0    | 0    | 0     | 0    | 0     | 0     | 0      |
| 73813 | 'Fam83e'        | 0.68  | 0     | 0    | 0    | 0    | 0     | 0    | 0     | 0.01  | 1.53   |



|       |                 |       |       |      |      |      |       |      |       |       |        |
|-------|-----------------|-------|-------|------|------|------|-------|------|-------|-------|--------|
| 73822 | 'Mfsd12'        | 5.81  | 5.72  | 7.45 | 0.2  | 2.71 | 1.69  | 8.07 | 8.27  | 7.06  | 2.14   |
| 73825 | 'Ppp1r21'       | 9.28  | 6.83  | 8.94 | 24.7 | 3.13 | 4.86  | 9.77 | 12.19 | 11.3  | 7.39   |
| 73826 | 'Poldip3'       | 26.43 | 24.66 | 33.9 | 21.9 | 21.7 | 21.66 | 23.6 | 19.96 | 23.82 | 19.73  |
| 73827 | 'Tmem198b'      | 2.82  | 0.34  | 7.72 | 2.47 | 2.01 | 4.56  | 5.32 | 5.18  | 4.19  | 0.14   |
| 73828 | 'Dcaf4'         | 11.51 | 24.38 | 29.5 | 18.4 | 23.1 | 37.39 | 33.6 | 32    | 18.16 | 16.07  |
| 73830 | 'Eif3k'         | 155.6 | 192.9 | 182  | 261  | 226  | 280.4 | 163  | 186.1 | 184   | 187.03 |
| 73833 | 'Fam98c'        | 15.74 | 24.64 | 29.7 | 0    | 23.1 | 20.74 | 16   | 12.54 | 10.07 | 2.82   |
| 73834 | 'Atp6v1d'       | 299.4 | 316.8 | 325  | 295  | 327  | 296.7 | 294  | 391.5 | 349.1 | 343.79 |
| 73836 | 'Slc35b2'       | 30.63 | 21.59 | 46.6 | 9.68 | 20.9 | 15.01 | 45.8 | 20.21 | 30.16 | 13.68  |
| 73844 | 'Ankrd45'       | 11.26 | 18.39 | 8.21 | 6.9  | 8.69 | 5.78  | 4.65 | 6.77  | 8.22  | 9.26   |
| 73845 | 'Ankrd42'       | 6.82  | 4.69  | 7.77 | 8.63 | 10.3 | 11.22 | 23.9 | 7.63  | 12.09 | 20.66  |
| 73847 | 'Fam110a'       | 17.83 | 25.07 | 28.2 | 10.9 | 4.01 | 28.14 | 24.2 | 22.26 | 22.35 | 23.17  |
| 73852 | 'D3Ert751e'     | 11.99 | 14.21 | 21.4 | 0.96 | 21   | 11.43 | 22.1 | 14.26 | 15.61 | 27.09  |
| 73863 | '4930415O20Rik' | 0     | 0.28  | 0    | 0    | 0    | 0.27  | 0    | 0     | 0.08  | 0      |
| 73873 | 'Fam161a'       | 3.94  | 3.87  | 0.73 | 1.17 | 0.71 | 3.62  | 5.13 | 1.46  | 1.9   | 3.6    |
| 73884 | 'Zdbf2'         | 3.11  | 2.24  | 2.41 | 3.38 | 1.34 | 3.46  | 2.7  | 0.98  | 5.54  | 2.76   |
| 73893 | 'Tmem202'       | 3.95  | 6.34  | 0    | 10.1 | 0    | 14.44 | 7.89 | 4.44  | 4.72  | 1.51   |
| 73902 | 'Psemb11'       | 0.01  | 0.01  | 0.09 | 0.2  | 0.06 | 0.1   | 0.03 | 0.03  | 0.1   | 0.05   |
| 73910 | 'Arhgap18'      | 0.07  | 5.34  | 0.88 | 7.4  | 0.51 | 1.49  | 2.33 | 4.53  | 0.32  | 3.05   |
| 73916 | 'Ift57'         | 11.6  | 4.21  | 4.35 | 17.3 | 9.62 | 7.98  | 3.57 | 9.1   | 10.42 | 3.37   |
| 73919 | 'Lymr1'         | 28.33 | 17.31 | 17.6 | 14.1 | 35   | 9.46  | 24.4 | 30.88 | 30.91 | 18.68  |
| 73936 | 'Ccdc175'       | 0     | 0     | 0    | 0    | 2.49 | 0     | 0    | 0     | 0     | 0      |
| 73940 | 'Hapl2'         | 3.65  | 6.19  | 2.3  | 0.03 | 10.1 | 25.88 | 2.93 | 0     | 1.48  | 1.87   |
| 73942 | 'Fam151b'       | 0     | 0     | 0    | 0    | 0    | 0     | 0    | 0.03  | 0     | 0      |
| 73945 | 'Otud4'         | 2.38  | 1.39  | 2.43 | 3.99 | 4.72 | 0.77  | 3.24 | 1.34  | 1.64  | 0.65   |
| 73991 | 'Atf1'          | 91.09 | 80.86 | 69.1 | 27.5 | 49.1 | 54.25 | 48.1 | 72.27 | 70.3  | 47.14  |
| 73998 | 'Herc3'         | 11.58 | 8.67  | 3.05 | 13.5 | 14.2 | 7.48  | 8.42 | 10.84 | 6.84  | 12.77  |
| 74002 | 'Psd2'          | 7.97  | 11.21 | 19.5 | 17.5 | 15.7 | 7.45  | 9.65 | 5.84  | 10.77 | 3.45   |
| 74004 | 'Jakmp3'        | 1.06  | 5.06  | 1.55 | 0.07 | 0.67 | 3.1   | 3.31 | 1.72  | 2.05  | 2.64   |
| 74006 | 'Dnm1l'         | 65.41 | 40.27 | 77   | 80.3 | 34.7 | 42.1  | 65.7 | 54.89 | 73.04 | 72.2   |
| 74007 | 'Btbd11'        | 13.33 | 7.25  | 5.22 | 6.09 | 5.82 | 0.58  | 12.8 | 7.53  | 15.88 | 8.01   |
| 74008 | 'Arsg'          | 0     | 8.95  | 4    | 7.69 | 4.05 | 9.36  | 4.63 | 0.38  | 6.57  | 1.14   |
| 74011 | 'Slc25a27'      | 14.36 | 20.44 | 24.9 | 9.13 | 17.8 | 9.41  | 11.8 | 20.89 | 35.05 | 2.65   |
| 74012 | 'Rap2b'         | 10.86 | 10.55 | 9.1  | 14.8 | 13.5 | 9.74  | 10.4 | 10.6  | 4.22  | 5.34   |
| 74013 | 'Rftn2'         | 5.65  | 0     | 4.26 | 6.5  | 0.02 | 3.53  | 10   | 6.09  | 6.39  | 0.13   |
| 74015 | 'Fcho1'         | 33.02 | 24.32 | 18.8 | 4.61 | 35.9 | 21.91 | 35.2 | 32.24 | 50.69 | 21.02  |
| 74016 | 'Phf19'         | 0     | 0     | 0.01 | 0    | 0    | 0     | 0    | 0     | 0     | 0      |
| 74018 | 'Als2'          | 1.47  | 4.24  | 4.69 | 8.95 | 1.9  | 3.37  | 4.56 | 0.72  | 3.02  | 1.3    |
| 74019 | 'Traf3ip1'      | 1.58  | 5.31  | 1.9  | 9.54 | 2.4  | 0.02  | 1.4  | 3.08  | 4.92  | 0.92   |
| 74020 | 'Cpne4'         | 11.04 | 5.48  | 18.9 | 6.45 | 8.78 | 7.59  | 0    | 4.84  | 0.01  | 2.55   |
| 74022 | 'Glyr1'         | 61.84 | 52.97 | 86.3 | 36.3 | 35.5 | 29.75 | 72.2 | 49.78 | 54.54 | 59.57  |
| 74023 | 'Rd3'           | 0     | 1.56  | 0    | 0    | 24.3 | 0     | 0    | 0.12  | 0     | 0      |
| 74025 | 'Nphp3'         | 0.86  | 0.05  | 0.58 | 3.32 | 2.27 | 4.01  | 0.77 | 0.38  | 1.36  | 0.76   |
| 74026 | 'Msl1'          | 5.01  | 13.57 | 5.53 | 12.1 | 8.94 | 13.99 | 3.42 | 5.18  | 9.84  | 5.76   |
| 74030 | 'Rin2'          | 2.85  | 1.53  | 2.62 | 3.03 | 4.09 | 0.8   | 17.6 | 2.03  | 0.28  | 0      |
| 74032 | 'Sdr42e1'       | 0     | 13.66 | 9.28 | 0    | 4.81 | 11.45 | 10   | 16.82 | 0     | 6.3    |
| 74035 | 'Nol9'          | 3.24  | 1.51  | 3.03 | 0.07 | 0.11 | 8.37  | 3.47 | 2.61  | 4.86  | 1.56   |
| 74039 | 'Nfam1'         | 0.02  | 0     | 0.04 | 0.04 | 0    | 1.55  | 0    | 0     | 0     | 0.01   |
| 74041 | 'Ddias'         | 0     | 0     | 0    | 0    | 0    | 0.63  | 0    | 0     | 0     | 0      |
| 74043 | 'Pex26'         | 1.67  | 4.84  | 1.89 | 0.02 | 2.09 | 0     | 4.42 | 3.33  | 5.24  | 1.66   |
| 74044 | 'Ttf2'          | 0     | 0     | 0    | 0    | 0    | 0     | 0    | 0.64  | 1.89  | 0      |
| 74048 | 'Vsir'          | 0     | 0.83  | 3.07 | 0    | 1.19 | 4.31  | 0    | 0     | 1.07  | 0      |
| 74051 | 'Steap2'        | 1.13  | 0.29  | 5.5  | 2.27 | 0.09 | 0.51  | 1.82 | 2.08  | 0.48  | 1.46   |
| 74052 | 'Ttc21a'        | 1.14  | 0     | 0    | 2.17 | 0    | 0.97  | 0.19 | 0.34  | 0     | 0      |
| 74053 | 'Grip1'         | 1.74  | 2.81  | 3.5  | 0.72 | 4.54 | 2.94  | 4.59 | 4.44  | 4.96  | 0.89   |
| 74055 | 'Plce1'         | 0.02  | 0.83  | 0    | 0    | 0    | 0     | 0.82 | 0     | 0     | 0.32   |
| 74071 | 'Lmntd1'        | 0.02  | 0.03  | 1.81 | 0    | 0    | 0     | 0    | 0     | 0     | 1.29   |
| 74075 | 'Syce1'         | 0     | 0     | 0    | 8.63 | 0    | 0.41  | 0    | 0     | 0     | 0      |

|       |                 |       |       |      |      |      |       |      |       |       |       |
|-------|-----------------|-------|-------|------|------|------|-------|------|-------|-------|-------|
| 74080 | 'Nmnat3'        | 10.86 | 3.14  | 0    | 0.39 | 0    | 4.21  | 0    | 5.25  | 6.45  | 2.6   |
| 74081 | 'Cep350'        | 0     | 1.26  | 1.28 | 3.14 | 1.66 | 0.12  | 1.23 | 0.85  | 1.06  | 0.8   |
| 74090 | 'Paqr5'         | 0     | 0     | 0    | 5.97 | 0    | 0     | 0    | 0     | 0.79  | 0.41  |
| 74091 | 'Npl'           | 2.78  | 6.02  | 0    | 1.32 | 0    | 5.24  | 3.84 | 3.81  | 0     | 3.4   |
| 74094 | 'Tjap1'         | 7.22  | 5.78  | 5.53 | 0.02 | 2.3  | 7.35  | 9.11 | 8.04  | 4.36  | 0.77  |
| 74096 | 'Hvcn1'         | 0.02  | 0.21  | 0    | 0    | 1.46 | 4.75  | 0    | 0     | 0.09  | 0     |
| 74097 | 'Pop7'          | 54.96 | 55.5  | 47.4 | 41.1 | 75   | 46.67 | 49.3 | 62.38 | 25.67 | 68.69 |
| 74098 | '0610037L13Rik' | 45.06 | 40.53 | 53.8 | 41.8 | 60.9 | 34.79 | 76.9 | 50.49 | 33.62 | 68.28 |
| 74100 | 'Arpp21'        | 15.07 | 13.95 | 8.48 | 18.1 | 56   | 28.35 | 23.4 | 29.72 | 8.24  | 4.62  |
| 74102 | 'Slc35a5'       | 8.95  | 6.67  | 6.91 | 4.56 | 5.46 | 6.75  | 7.64 | 13.26 | 17.49 | 16.03 |
| 74103 | 'Nebi'          | 18.23 | 8.37  | 20.2 | 20.8 | 8.45 | 6.07  | 14.4 | 5.61  | 11.7  | 4.67  |
| 74104 | 'Abcb6'         | 5.96  | 14.88 | 17.7 | 0    | 11.2 | 19.36 | 8.22 | 13.42 | 8.14  | 16.91 |
| 74105 | 'Gga2'          | 2.16  | 3.44  | 1.39 | 4.96 | 4.98 | 4.45  | 5.09 | 7.12  | 7.01  | 3.99  |
| 74106 | 'Dcaf6'         | 5.97  | 8.05  | 4.95 | 0.56 | 6.17 | 1.59  | 4.51 | 6.73  | 1.09  | 1.23  |
| 74107 | 'Cep55'         | 0     | 0     | 0.09 | 0    | 0    | 0     | 0    | 0     | 0     | 0     |
| 74108 | 'Parn'          | 8.24  | 24.36 | 24.1 | 19.1 | 14.3 | 10.43 | 20.7 | 16.5  | 19.53 | 24.61 |
| 74111 | 'Rbm19'         | 1.6   | 2.46  | 1.21 | 4.37 | 3.39 | 2.01  | 7.36 | 1.48  | 9.77  | 4.02  |
| 74112 | 'Usp16'         | 6.73  | 4.5   | 5.22 | 13.2 | 5.71 | 5.74  | 9.77 | 5.54  | 7.3   | 12.65 |
| 74114 | 'Crot'          | 10.06 | 5.24  | 15.9 | 0    | 3.07 | 14.84 | 10.9 | 9.9   | 20.49 | 10.55 |
| 74116 | 'Pi16'          | 19.56 | 21.69 | 14.5 | 11.3 | 12.5 | 32.12 | 3.45 | 12.38 | 14.06 | 32.65 |
| 74117 | 'Actr3'         | 52.62 | 44.93 | 46.7 | 53.7 | 49   | 32.24 | 45.6 | 58.19 | 50.22 | 74.21 |
| 74120 | 'Zfp263'        | 6.52  | 22.86 | 18.5 | 5.76 | 30.3 | 7.55  | 5.02 | 16.61 | 23.99 | 11.58 |
| 74121 | 'Acox1'         | 0     | 0     | 0    | 0.43 | 0    | 0     | 0    | 0.31  | 0     | 0     |
| 74122 | 'Tmem43'        | 21.79 | 34.84 | 31.6 | 33.7 | 20.5 | 17.91 | 25.4 | 39.05 | 30.68 | 52    |
| 74123 | 'Foxp4'         | 6.73  | 10.18 | 16.6 | 5    | 4.44 | 4.29  | 7.6  | 10.2  | 23.87 | 1.5   |
| 74125 | 'Armc8'         | 53.13 | 45.82 | 37.1 | 42.2 | 18.1 | 34.65 | 16.3 | 39.41 | 55.52 | 43.86 |
| 74126 | 'Syvn1'         | 7.24  | 11.05 | 9.24 | 10.8 | 13.4 | 6.17  | 9.46 | 13.49 | 18.87 | 15.97 |
| 74129 | 'Dmgdh'         | 0     | 1.37  | 0    | 0    | 0    | 0     | 0.27 | 0.11  | 0     | 0.2   |
| 74131 | 'Sash3'         | 1.13  | 0     | 0    | 0    | 0    | 0     | 0    | 0     | 0     | 0     |
| 74132 | 'Rnf6'          | 33.95 | 47.21 | 28.8 | 28.5 | 27.6 | 54.66 | 35   | 42.74 | 34.47 | 37.64 |
| 74133 | 'Smg8'          | 1.82  | 6.15  | 5.26 | 0    | 4.73 | 4.53  | 7.07 | 3.37  | 3.5   | 8.22  |
| 74134 | 'Cyp2s1'        | 2.84  | 0     | 8.41 | 0.02 | 0    | 6.05  | 0    | 1.97  | 0     | 0     |
| 74136 | 'Sec14l1'       | 4.61  | 8.25  | 4.5  | 3.85 | 1.5  | 5.68  | 7.81 | 7.26  | 2.2   | 7.04  |
| 74137 | 'Nuak2'         | 0     | 1.78  | 0    | 0    | 0    | 2.15  | 0    | 1.93  | 5.49  | 0     |
| 74140 | 'Tm9sf1'        | 15.54 | 22.94 | 39   | 4.77 | 26.5 | 19.88 | 21.3 | 18.28 | 33.69 | 22.8  |
| 74142 | 'Lonp1'         | 8.83  | 9.47  | 6.39 | 21.4 | 24.6 | 8.2   | 8.39 | 10.54 | 7.26  | 17.3  |
| 74143 | 'Opa1'          | 9.5   | 6.54  | 13.7 | 2.45 | 4.6  | 2.37  | 12.9 | 7.48  | 7.92  | 14.08 |
| 74147 | 'Ehhadh'        | 0.02  | 0     | 0    | 0    | 0    | 0.02  | 4.85 | 0     | 0     | 0.94  |
| 74148 | 'Cluh'          | 8.02  | 5.34  | 19.8 | 8.66 | 6.82 | 5.07  | 0.44 | 5.16  | 7.8   | 2.95  |
| 74149 | 'Zfp946'        | 6.7   | 6.14  | 7.84 | 0    | 6.46 | 3.16  | 6.78 | 13.38 | 2.14  | 8.06  |
| 74150 | 'Slc35f5'       | 19.36 | 15.54 | 9.64 | 10.4 | 4.2  | 13.02 | 16.1 | 22.47 | 4.57  | 18.57 |
| 74152 | 'Stra6l'        | 0     | 0     | 0    | 0.02 | 0    | 0     | 8.23 | 0     | 0     | 0.01  |
| 74153 | 'Uba7'          | 0     | 0     | 0    | 0    | 0    | 10.29 | 0.2  | 0     | 0     | 2.62  |
| 74154 | 'Unkl'          | 20.31 | 10.23 | 11.4 | 5.86 | 14.5 | 3.2   | 10.9 | 13.71 | 19.42 | 26.12 |
| 74155 | 'Errfi1'        | 10.79 | 15.55 | 16.1 | 10.4 | 14.5 | 15.12 | 19.4 | 11.04 | 3.23  | 5.48  |
| 74156 | 'Acot12'        | 0     | 1.87  | 0    | 0    | 0    | 0     | 0    | 0     | 0     | 0     |
| 74157 | 'Cmtr1'         | 42.06 | 44.58 | 52.6 | 42.7 | 26.9 | 23.29 | 42.3 | 36.34 | 54.36 | 47.28 |
| 74158 | 'Josd1'         | 4.66  | 1.92  | 1.29 | 4.36 | 7.92 | 1.01  | 5.26 | 5.41  | 5.38  | 10.01 |
| 74159 | 'Acbd5'         | 15.31 | 12.64 | 16.8 | 5.12 | 13.4 | 9.76  | 12.7 | 7.53  | 11.26 | 14.18 |
| 74164 | 'Nfx1'          | 30.45 | 37.69 | 38.4 | 32.7 | 23.6 | 22.01 | 50.9 | 25.63 | 32    | 31.74 |
| 74165 | 'Fbxl22'        | 3.01  | 0.36  | 0.06 | 0    | 3.61 | 0.04  | 0.03 | 0.5   | 0.01  | 0.5   |
| 74166 | 'Tmem38a'       | 16.94 | 42.04 | 70.9 | 6.78 | 26   | 36.14 | 37   | 42.78 | 36.3  | 40.4  |
| 74167 | 'Nudt9'         | 39.6  | 22.03 | 19   | 40.8 | 18.1 | 12.81 | 17.7 | 17.32 | 26.79 | 25.15 |
| 74168 | 'Zdhhc16'       | 27.48 | 14.94 | 15.8 | 25.8 | 24.8 | 21.55 | 42.7 | 29.54 | 9.31  | 34.85 |
| 74174 | 'Gtsf1'         | 0     | 0     | 0.29 | 0    | 0    | 0     | 3.4  | 0     | 0     | 0     |
| 74178 | 'Stk40'         | 0.14  | 3.4   | 4.26 | 5.34 | 1.9  | 0     | 1.45 | 0.31  | 0.01  | 0.19  |
| 74180 | 'Muc5b'         | 0     | 0     | 0    | 0    | 0    | 0     | 0    | 0     | 0     | 0     |
| 74182 | 'Gpcpd1'        | 13.99 | 15.19 | 22.2 | 8.95 | 18.5 | 11.69 | 5.22 | 22.29 | 21.33 | 31.03 |

|       |                 |       |       |      |      |      |       |      |       |       |        |
|-------|-----------------|-------|-------|------|------|------|-------|------|-------|-------|--------|
| 74183 | 'Perm1'         | 0.3   | 0.22  | 1.19 | 0.01 | 1.55 | 0.24  | 0.08 | 0     | 0.46  | 1.15   |
| 74185 | 'Gbe1'          | 1.88  | 7.33  | 4.83 | 0    | 2.35 | 0.8   | 2.74 | 4.69  | 2.21  | 9.5    |
| 74186 | 'Ccadc3'        | 0     | 0     | 0    | 0    | 0    | 0     | 0    | 4.96  | 0     | 0.02   |
| 74187 | 'Katnb1'        | 36.72 | 24.3  | 46.9 | 44   | 17.2 | 22.62 | 36.5 | 32.1  | 57.47 | 44.83  |
| 74189 | 'Phactr3'       | 11.95 | 17.94 | 12.5 | 26   | 10.7 | 9.97  | 10.7 | 18.99 | 13.13 | 10.65  |
| 74190 | 'Exoc3l4'       | 1.54  | 2.88  | 0    | 2.77 | 0    | 2.82  | 2.4  | 1.01  | 0.38  | 5.08   |
| 74191 | 'P2ry13'        | 0     | 0     | 0    | 0    | 0    | 17.05 | 0    | 0     | 0     | 0      |
| 74192 | 'Arpc5l'        | 123.2 | 143.9 | 122  | 195  | 215  | 237.5 | 164  | 206.6 | 175.3 | 188.6  |
| 74194 | 'Rnd3'          | 9.85  | 10.18 | 9.87 | 36   | 2.33 | 6.57  | 7.01 | 11.61 | 10.07 | 3.9    |
| 74195 | 'Elp3'          | 45.42 | 51.88 | 53.6 | 43.6 | 40.7 | 38.36 | 49.5 | 46.23 | 52.6  | 46.16  |
| 74196 | 'Ttc27'         | 2.14  | 12.9  | 8.6  | 0.71 | 12.1 | 7.08  | 4.69 | 9.72  | 0.03  | 7.21   |
| 74197 | 'Gtf2e1'        | 2.58  | 9.69  | 7.36 | 13.3 | 14.9 | 1.26  | 7.2  | 3.83  | 8.7   | 7.67   |
| 74198 | 'Dtx2'          | 3.23  | 1.05  | 6.53 | 6.74 | 0    | 0.32  | 0    | 0     | 0     | 0.73   |
| 74199 | 'Vit'           | 2.25  | 1.58  | 0.01 | 0.04 | 0    | 0     | 4.24 | 0     | 0.59  | 0      |
| 74200 | 'Khdc4'         | 18.12 | 19.74 | 16   | 6.63 | 6.94 | 8.89  | 15   | 23.68 | 23.26 | 29.2   |
| 74201 | 'Cep97'         | 3.49  | 0.68  | 1.02 | 0.51 | 2.8  | 0     | 0.46 | 1.8   | 0     | 1.13   |
| 74202 | 'Fblim1'        | 0.03  | 0.19  | 0.03 | 0.02 | 0.02 | 0.01  | 0.02 | 0     | 0.91  | 0.01   |
| 74203 | 'Eif4enif1'     | 6.43  | 9.03  | 4.11 | 4.91 | 13.8 | 2.83  | 4.98 | 6.68  | 9.75  | 6.65   |
| 74204 | 'Xpo6'          | 30.17 | 98.04 | 9.7  | 41.1 | 90.4 | 16.55 | 7.34 | 10.61 | 10.86 | 23.16  |
| 74205 | 'Acsl3'         | 10.8  | 19.52 | 7.47 | 22.4 | 11.4 | 13.54 | 9.27 | 17.72 | 22.16 | 7.51   |
| 74206 | 'Sipa1l3'       | 0.02  | 0.82  | 0.2  | 3.4  | 0.97 | 0.01  | 0.02 | 0.51  | 1.09  | 0.22   |
| 74211 | '1700017B05Rik' | 3.13  | 1.13  | 0.08 | 0    | 5.24 | 6.69  | 5.47 | 3.04  | 2.12  | 7.24   |
| 74213 | 'Rbm26'         | 10.59 | 19.42 | 10.2 | 15.7 | 21.2 | 8.79  | 7.67 | 10.01 | 17.4  | 12.64  |
| 74229 | 'Paqr8'         | 10.83 | 6.3   | 3.79 | 6.27 | 5.72 | 4.66  | 5.17 | 2.89  | 3.03  | 2.76   |
| 74230 | '1700016K19Rik' | 0     | 0.06  | 0    | 5.57 | 1.39 | 5.87  | 0    | 0.38  | 0     | 4.6    |
| 74237 | 'Tubgcp2'       | 22.72 | 27.89 | 30.1 | 29.6 | 24   | 20.33 | 17.9 | 20.14 | 22.32 | 23.77  |
| 74238 | 'Mterf2'        | 12.58 | 18.88 | 14.2 | 29.2 | 10.7 | 7.66  | 14.5 | 26.57 | 12.35 | 8.2    |
| 74239 | 'Iqce'          | 4.27  | 9.83  | 11.4 | 2.49 | 12.5 | 10.5  | 11.8 | 3.89  | 8.78  | 13.14  |
| 74241 | 'Chpf'          | 13.34 | 14.09 | 12.9 | 5.65 | 23.6 | 13.49 | 8.78 | 8.85  | 23.89 | 4.56   |
| 74243 | 'Slx4ip'        | 4.04  | 5.12  | 0.46 | 1.97 | 7.83 | 2.43  | 0.35 | 1.65  | 1.12  | 1.63   |
| 74244 | 'Atg7'          | 9.84  | 9.82  | 20.2 | 4.94 | 2.28 | 0.95  | 4.47 | 6.58  | 10.6  | 9.15   |
| 74245 | 'Ctbs'          | 1.84  | 0.05  | 1.05 | 5.92 | 1.85 | 1.51  | 1.97 | 0.01  | 0     | 1.29   |
| 74246 | 'Gale'          | 18.26 | 28.25 | 21.1 | 8.64 | 17.8 | 19.8  | 11.9 | 29.39 | 25.47 | 23.87  |
| 74249 | 'Lrrc2'         | 1.62  | 0.48  | 0.16 | 0.14 | 0.2  | 0.07  | 2.81 | 0.01  | 0.1   | 1.17   |
| 74251 | 'Ankrd9'        | 4.81  | 7.13  | 10.3 | 0.04 | 6.39 | 22.56 | 14.3 | 7.87  | 8.57  | 9.1    |
| 74252 | 'Armc1'         | 44.6  | 38.11 | 37.2 | 20   | 24.5 | 46.13 | 28.2 | 36.6  | 40.4  | 28.27  |
| 74253 | 'Klrg2'         | 0     | 0     | 0    | 0    | 0    | 0     | 0    | 0     | 0     | 0.45   |
| 74254 | 'Gpn1'          | 46.58 | 65.42 | 68.5 | 69.4 | 38.1 | 67.61 | 60.1 | 64.77 | 52.25 | 86.26  |
| 74255 | 'Smu1'          | 62    | 68.8  | 54.8 | 74.1 | 36.5 | 22.42 | 48.6 | 49.07 | 46.61 | 76.02  |
| 74256 | 'Cylid'         | 13.47 | 14.36 | 13.8 | 13.4 | 11.3 | 6.83  | 21.9 | 8.09  | 13.69 | 12.21  |
| 74257 | 'Tspan17'       | 35.61 | 20.44 | 31   | 54.6 | 28.9 | 22.16 | 17.9 | 30.18 | 44.02 | 19.52  |
| 74264 | 'Rnf138rt1'     | 12.51 | 9.89  | 10.7 | 78.1 | 5.32 | 16.63 | 19   | 11.26 | 12.51 | 31.53  |
| 74268 | 'Aven'          | 0.34  | 0.1   | 0    | 0    | 3.18 | 3.79  | 0    | 3.32  | 0.98  | 0      |
| 74270 | 'Usp20'         | 37.43 | 42.2  | 48.8 | 6.31 | 32.4 | 15.27 | 29.7 | 46.02 | 44.69 | 26.3   |
| 74277 | 'Chic2'         | 0     | 0.3   | 0.47 | 9.37 | 0    | 0.07  | 1.5  | 0.61  | 0     | 0      |
| 74281 | 'Spatc1'        | 0     | 0     | 0    | 0    | 0    | 0     | 0    | 0     | 0     | 0.08   |
| 74286 | 'Tbc1d21'       | 0     | 0     | 0    | 0    | 0    | 0.22  | 0    | 0     | 0     | 0      |
| 74287 | 'Kcmf1'         | 4.53  | 2.21  | 4.43 | 7.73 | 9.99 | 1.34  | 6.88 | 1.99  | 3.55  | 5.43   |
| 74302 | 'Mtmr3'         | 1.05  | 4.72  | 7.1  | 11   | 8.64 | 9.02  | 3.96 | 0.34  | 2.35  | 5.64   |
| 74307 | '1700092M07Rik' | 0     | 0     | 0    | 0    | 0    | 0     | 0    | 0     | 0     | 1.06   |
| 74309 | 'Osbp2'         | 0.65  | 3.72  | 11.4 | 3.72 | 2.86 | 0.01  | 6.31 | 7.22  | 4.34  | 2.52   |
| 74315 | 'Rnf145'        | 17.45 | 13.99 | 5.35 | 32.3 | 20.5 | 6.69  | 13.5 | 17.33 | 21.59 | 7.05   |
| 74316 | 'Isca2'         | 132.6 | 81.39 | 99.6 | 105  | 147  | 197.1 | 48.7 | 145.3 | 113.8 | 102.07 |
| 74318 | 'Hopx'          | 0     | 0     | 1.24 | 0    | 4.17 | 0.09  | 1.68 | 0     | 0.07  | 0.84   |
| 74319 | 'Mettl23'       | 21.59 | 21.01 | 12.6 | 23.4 | 6.44 | 11.55 | 30.8 | 6.79  | 9.68  | 22.29  |
| 74320 | 'Wdr33'         | 20.86 | 37.56 | 29.9 | 43.5 | 30.2 | 23.37 | 20.1 | 16.72 | 27.63 | 43.25  |
| 74322 | 'Cxxc1'         | 26.81 | 16.19 | 22.1 | 13   | 20.5 | 8.73  | 8.2  | 17.54 | 31.12 | 14.97  |
| 74325 | 'Cltb'          | 183.1 | 155.4 | 179  | 124  | 190  | 154.6 | 182  | 166.5 | 229.8 | 130.73 |

|       |                 |       |       |      |      |      |       |      |       |       |       |
|-------|-----------------|-------|-------|------|------|------|-------|------|-------|-------|-------|
| 74326 | 'Hnrnr'         | 74.48 | 84.17 | 76.5 | 80.3 | 54.7 | 56.17 | 54.8 | 71.97 | 46.76 | 74.07 |
| 74330 | 'Dnajc14'       | 14.06 | 10.54 | 17.3 | 6.2  | 8.4  | 10.92 | 4.8  | 16.4  | 13.43 | 31.44 |
| 74334 | 'Ranbp10'       | 8.4   | 4.84  | 1.5  | 5.97 | 0.6  | 2.26  | 3.32 | 0.35  | 2.62  | 1.18  |
| 74335 | 'Xrcc3'         | 14.72 | 6.28  | 16.2 | 0.02 | 26.3 | 0     | 0.04 | 35.34 | 11.42 | 0     |
| 74337 | 'Palm3'         | 0     | 1.5   | 0.66 | 0    | 0    | 1.5   | 0    | 1.32  | 0     | 1.51  |
| 74338 | 'Slc6a19'       | 0     | 0     | 0    | 0    | 0    | 0.01  | 0    | 0     | 0     | 0     |
| 74340 | 'Ahcyl2'        | 9.87  | 4.88  | 2.66 | 9.96 | 2.94 | 0.99  | 9.75 | 2.39  | 1.1   | 4.85  |
| 74342 | 'Lrrtm1'        | 20.48 | 24.17 | 47.9 | 7.43 | 58.8 | 41.26 | 43.4 | 56.65 | 41.73 | 13.56 |
| 74343 | 'Crtc2'         | 10.22 | 6.79  | 16.4 | 17.4 | 4.48 | 5.44  | 6.2  | 6.89  | 8.29  | 0.12  |
| 74347 | 'Tlhc1'         | 4.34  | 4.75  | 1.06 | 2.62 | 0    | 0.02  | 0    | 1.07  | 2.55  | 0.02  |
| 74349 | 'Fam160a2'      | 3.64  | 3.8   | 3    | 2.59 | 3.28 | 1.94  | 6.51 | 2.23  | 3.74  | 3.73  |
| 74351 | 'Ddx23'         | 7.66  | 9.09  | 4.75 | 2.01 | 0.88 | 0.9   | 5.02 | 4.32  | 4.34  | 10.65 |
| 74352 | 'Zfp84'         | 1.03  | 0     | 1.5  | 4.15 | 3.01 | 2.98  | 1.87 | 1.39  | 3.43  | 3.97  |
| 74354 | 'Lrguk'         | 2.05  | 1.89  | 3.44 | 4.77 | 0.37 | 1.62  | 0    | 0.49  | 0.26  | 0.6   |
| 74355 | 'Smchd1'        | 2.77  | 2.88  | 5.32 | 10.1 | 1.92 | 5.77  | 2.01 | 1     | 3.31  | 2.64  |
| 74356 | '4931428F04Rik' | 12.86 | 6.19  | 12.5 | 3.76 | 2.34 | 4.86  | 18.4 | 13.15 | 20.7  | 10.67 |
| 74359 | '4931414P19Rik' | 0.87  | 1.29  | 3.36 | 2.99 | 1.76 | 1.99  | 0.52 | 0.45  | 4     | 0.45  |
| 74360 | 'Cep57'         | 13.9  | 6.19  | 14.1 | 12.1 | 5.06 | 11.57 | 17.1 | 8.86  | 13.81 | 12.67 |
| 74361 | '4931429L15Rik' | 0     | 0     | 0    | 0.24 | 0    | 0     | 0    | 0     | 0     | 0     |
| 74362 | 'Spag17'        | 0     | 0     | 0    | 0    | 0    | 0     | 0    | 0.06  | 0.21  | 0     |
| 74365 | 'Lonrf3'        | 0.64  | 0.99  | 1.06 | 2.96 | 1.77 | 0.92  | 2.1  | 0.01  | 0.01  | 0     |
| 74369 | 'Mei1'          | 0     | 0     | 0    | 0    | 0    | 0     | 0    | 0     | 0     | 0.03  |
| 74370 | 'Rptor'         | 1.75  | 2.28  | 6.49 | 0.43 | 9.23 | 1.96  | 5.82 | 3.71  | 2.5   | 8.74  |
| 74374 | 'Clec16a'       | 38.13 | 46.62 | 51.8 | 60.9 | 24.3 | 28.74 | 33   | 40.79 | 30.68 | 39.45 |
| 74375 | 'Gcc1'          | 2.65  | 10.16 | 5.21 | 9.22 | 8.9  | 2.71  | 11.1 | 4.85  | 2.27  | 1.93  |
| 74376 | 'Myo18b'        | 1.03  | 0     | 0.41 | 1.56 | 0    | 0.02  | 1.6  | 0     | 0.01  | 0.01  |
| 74377 | 'Hsf2bp'        | 0     | 4.7   | 0.06 | 0    | 0    | 0     | 3.28 | 0     | 0     | 0     |
| 74383 | 'Ubap2l'        | 32.28 | 25.84 | 26   | 33.4 | 39.4 | 20.09 | 29.3 | 42.15 | 33.81 | 44.63 |
| 74385 | 'Ap5m1'         | 6.32  | 4.81  | 7.11 | 5.69 | 7.28 | 1.95  | 12.6 | 10.23 | 14.84 | 6.57  |
| 74386 | 'Rmi1'          | 9.04  | 6.21  | 10.3 | 0.62 | 6.86 | 3.16  | 0.01 | 6.11  | 7.1   | 7.05  |
| 74387 | '4932438H23Rik' | 1.55  | 4.7   | 0.08 | 1.72 | 0    | 0.02  | 0.98 | 0.02  | 1.84  | 5.56  |
| 74388 | 'Dpp8'          | 5.61  | 1.31  | 2.41 | 5.88 | 1.72 | 0.47  | 12.6 | 3.87  | 3.97  | 3.57  |
| 74392 | 'Specc1l'       | 0.91  | 1.6   | 5.49 | 3.69 | 7.59 | 3.63  | 3.85 | 5.25  | 8.42  | 0.76  |
| 74393 | 'Map10'         | 2.97  | 3.29  | 3.91 | 0.35 | 0    | 0.01  | 1.1  | 1.48  | 5.05  | 2     |
| 74400 | 'Zfp819'        | 0     | 7.02  | 0.05 | 0    | 0.02 | 4.95  | 0    | 0     | 0     | 3.64  |
| 74405 | 'Efhc2'         | 0.08  | 2.14  | 0.28 | 4.96 | 1.7  | 1.22  | 0    | 2.1   | 3.75  | 7.27  |
| 74407 | 'Ttc25'         | 0     | 0     | 0    | 0.19 | 0.7  | 2.5   | 0.17 | 0     | 5.93  | 2.37  |
| 74410 | 'Tll11'         | 1.53  | 1.83  | 4.2  | 0    | 3.76 | 0.01  | 4.19 | 0.05  | 4.45  | 0.73  |
| 74411 | 'Plpp6'         | 2.83  | 3.34  | 2.83 | 1.65 | 3.34 | 1.74  | 6.2  | 1.94  | 3.09  | 5.33  |
| 74412 | 'Gle1'          | 35.84 | 20.64 | 33.6 | 23.6 | 26.2 | 12.57 | 17.6 | 18.68 | 29.15 | 29.52 |
| 74413 | 'Tc2n'          | 0.23  | 0.03  | 0.04 | 0.13 | 0.14 | 0.34  | 0.2  | 0.25  | 0.16  | 0.46  |
| 74414 | 'Polr3c'        | 26.49 | 19.44 | 18.5 | 25   | 9.35 | 5.39  | 28.1 | 12.7  | 12.73 | 22.32 |
| 74419 | 'Tktl2'         | 0.01  | 0     | 0    | 1.69 | 0    | 0     | 0    | 0     | 0     | 0     |
| 74426 | '4933402D24Rik' | 0     | 0.28  | 0    | 0    | 0    | 0     | 0    | 0     | 0     | 0     |
| 74427 | 'Eaf1'          | 3.36  | 0.85  | 6.38 | 0.22 | 0.07 | 0.3   | 2.02 | 1.92  | 8.13  | 3.39  |
| 74430 | '4930452B06Rik' | 0.64  | 3.37  | 0.7  | 0    | 0    | 0.44  | 4.84 | 7.4   | 0     | 0     |
| 74435 | 'Lrriq3'        | 0     | 0     | 0.31 | 0    | 2.05 | 0.04  | 0    | 0     | 0     | 0     |
| 74438 | 'Clvs1'         | 12.32 | 13.73 | 15.2 | 1.89 | 18.8 | 7.75  | 0.07 | 19.62 | 24.89 | 14.6  |
| 74440 | 'Cmip'          | 87.64 | 118.9 | 66.5 | 89   | 84.9 | 112.8 | 117  | 92.12 | 83.02 | 91.35 |
| 74442 | 'Sgms2'         | 0.25  | 1.15  | 0.64 | 0.29 | 0.01 | 0     | 0    | 0.01  | 0     | 0.13  |
| 74443 | 'P4htm'         | 99.26 | 74.91 | 124  | 91.6 | 87.5 | 86.76 | 96.4 | 76.4  | 74.41 | 82.06 |
| 74446 | 'Slc9b1'        | 0     | 0     | 0    | 0    | 0    | 0     | 0    | 0     | 0     | 0.19  |
| 74448 | 'Arl13a'        | 0     | 0     | 0    | 0    | 0    | 0     | 0    | 0     | 0     | 0.1   |
| 74450 | 'Pank2'         | 0.6   | 2.27  | 0.06 | 3.04 | 4.31 | 3.15  | 1.06 | 5.26  | 0     | 0.48  |
| 74451 | 'Pgs1'          | 19.1  | 25.14 | 32.3 | 44.3 | 31   | 25.54 | 38.2 | 13.41 | 27.12 | 10.08 |
| 74453 | 'Cfap53'        | 0     | 0     | 0    | 0    | 0    | 0     | 0    | 0.55  | 0     | 0     |
| 74455 | 'Nsun6'         | 6.12  | 6.9   | 3.97 | 0.49 | 2.65 | 3.7   | 0    | 4.92  | 6.8   | 0.4   |
| 74464 | 'Zswim5'        | 0     | 0.09  | 2.33 | 2.92 | 0    | 1.22  | 0    | 0.33  | 0     | 0.11  |

|       |                 |       |       |      |      |      |       |      |       |       |        |
|-------|-----------------|-------|-------|------|------|------|-------|------|-------|-------|--------|
| 74466 | 'Mfsd13b'       | 0     | 1.91  | 0    | 0    | 0    | 1.27  | 0    | 0     | 0     | 0      |
| 74467 | 'Pus10'         | 1.08  | 3.32  | 2.67 | 3    | 4.78 | 1.44  | 1.14 | 2.4   | 6.48  | 8.02   |
| 74469 | 'Taf7l'         | 0.1   | 0.07  | 0    | 0    | 0    | 0     | 0    | 0     | 0     | 0      |
| 74470 | 'Cep72'         | 0     | 0.63  | 0    | 6.76 | 0    | 0     | 0.2  | 0     | 0     | 0.24   |
| 74471 | '4933440N22Rik' | 0     | 0.22  | 0.05 | 0    | 0    | 1.24  | 0    | 0     | 0.28  | 0      |
| 74477 | '4933427D14Rik' | 8.89  | 6.74  | 5.54 | 13   | 2.36 | 6.22  | 14.5 | 4.2   | 4.93  | 15.37  |
| 74478 | 'Snx29'         | 2.05  | 2.79  | 2.47 | 4.61 | 5.88 | 10.78 | 6.91 | 5     | 5.78  | 3.46   |
| 74479 | 'Snx11'         | 16.14 | 5.61  | 8.54 | 7.62 | 9.41 | 6.94  | 3.73 | 19.79 | 14.61 | 6.97   |
| 74480 | 'Samd4'         | 3.87  | 2.06  | 4.44 | 7.26 | 6.9  | 6.65  | 4.46 | 2.52  | 8.21  | 3.31   |
| 74482 | 'Ifitm7'        | 1.87  | 1.86  | 3.64 | 13   | 2.78 | 5.22  | 2.2  | 2.76  | 2.74  | 2.59   |
| 74485 | 'Lrrc71'        | 2.23  | 0.72  | 0    | 0    | 0.73 | 0     | 0    | 0.2   | 1.8   | 0      |
| 74486 | 'Osbp110'       | 0.57  | 0     | 5.55 | 4.74 | 6    | 0.79  | 0.02 | 4.38  | 7.18  | 3.23   |
| 74490 | 'Mamstr'        | 0     | 0     | 1.28 | 2.97 | 0    | 0     | 0    | 0     | 0     | 1.74   |
| 74492 | 'Kbtbd13'       | 0     | 0     | 0.24 | 0    | 0    | 0     | 0    | 0     | 0     | 0      |
| 74493 | 'Tnks2'         | 3.61  | 2.42  | 0.66 | 2.27 | 2.82 | 1.39  | 2.09 | 0.59  | 2.72  | 2.93   |
| 74498 | 'Gorasp1'       | 13.97 | 27.48 | 29   | 1.82 | 11.7 | 22.43 | 29.5 | 28.03 | 19.22 | 17.05  |
| 74504 | 'Fam53a'        | 19.23 | 30.08 | 27.3 | 13.7 | 22.1 | 11.49 | 25.4 | 28.3  | 27    | 25.6   |
| 74513 | 'Neto2'         | 3.39  | 1.15  | 0.74 | 3.95 | 3.06 | 1.7   | 0.55 | 0.97  | 0.65  | 1.07   |
| 74519 | 'Cyp2j9'        | 14.74 | 14.15 | 17.7 | 28.9 | 5.64 | 36.32 | 10.8 | 11.68 | 7.79  | 7.01   |
| 74521 | 'Ppp4r4'        | 1.44  | 4.17  | 2.27 | 7.21 | 2.01 | 2.15  | 0    | 3.01  | 3.14  | 4.64   |
| 74522 | 'Morc2a'        | 1.48  | 4.72  | 6.6  | 10.9 | 1.07 | 1.17  | 9.38 | 2.88  | 1.33  | 4.12   |
| 74525 | 'Fam234b'       | 60.1  | 61.98 | 93   | 10   | 62.8 | 66.48 | 79   | 75.52 | 88.89 | 104.66 |
| 74528 | 'Mgme1'         | 2.23  | 7.64  | 0    | 6.75 | 3.26 | 5.87  | 3.56 | 5.38  | 7.49  | 3.42   |
| 74533 | 'Gzf1'          | 14.85 | 5.39  | 8.2  | 0    | 4.08 | 17.64 | 15.5 | 8.44  | 3.47  | 10.19  |
| 74548 | 'Gsdmc4'        | 0     | 0.02  | 0.02 | 0    | 0    | 2.19  | 0    | 0     | 0     | 0.1    |
| 74549 | 'Mau2'          | 24.98 | 29.31 | 35.1 | 20.7 | 14.8 | 18.37 | 42.7 | 25.96 | 10.78 | 43.81  |
| 74551 | 'Pck2'          | 6.66  | 13.73 | 13.2 | 9.1  | 12.6 | 22.46 | 23.6 | 23.74 | 24.22 | 13.97  |
| 74552 | 'Nipal3'        | 6.83  | 11.15 | 6.89 | 2.66 | 10.7 | 8.49  | 16   | 9.22  | 10.91 | 6.07   |
| 74558 | 'Gvin1'         | 0     | 0     | 0    | 0    | 0.36 | 0.21  | 0    | 0     | 0     | 0      |
| 74559 | 'Elovl7'        | 0     | 1.26  | 0.03 | 0    | 0.94 | 2.89  | 0    | 0.65  | 0     | 0.31   |
| 74561 | 'Nkx6-3'        | 0     | 0     | 0    | 0.33 | 0    | 0     | 0    | 0     | 0     | 1.12   |
| 74563 | 'Rasgef1c'      | 9.94  | 5.17  | 3.19 | 3.22 | 1.68 | 0     | 9.55 | 3.97  | 0.02  | 3.43   |
| 74568 | 'Mlkl'          | 0     | 0     | 0    | 0    | 0    | 0.16  | 0    | 0     | 0     | 0      |
| 74569 | 'Ttc17'         | 3.97  | 2.61  | 12.2 | 2.52 | 6.11 | 12.5  | 9    | 6.71  | 7.32  | 12.75  |
| 74570 | 'Zkscan1'       | 3.43  | 3.48  | 4.21 | 1.86 | 3.68 | 5.16  | 2.5  | 2.04  | 6.31  | 1.92   |
| 74577 | 'Glb1l'         | 6.3   | 1.95  | 2.55 | 2.86 | 0.81 | 1.05  | 0.62 | 1.37  | 5.52  | 0.03   |
| 74580 | 'Pyroxd2'       | 0     | 0     | 0    | 0    | 0    | 0.96  | 0    | 0     | 0.12  | 1.3    |
| 74585 | 'Sppl3'         | 7.13  | 5.02  | 7.45 | 6.66 | 4.46 | 1.11  | 18.4 | 5.39  | 17.41 | 7.97   |
| 74589 | 'Kbtbd12'       | 0     | 0     | 0    | 0    | 0    | 0.02  | 0    | 1.63  | 0.46  | 1.84   |
| 74596 | 'Cds1'          | 1.4   | 0     | 0.43 | 7.33 | 3.46 | 0.98  | 1.57 | 3.82  | 6.44  | 5.48   |
| 74600 | 'Mrpl47'        | 21.95 | 36.76 | 39.8 | 0.21 | 33.5 | 55.68 | 32.4 | 28.81 | 18.59 | 23.28  |
| 74610 | 'Abcb8'         | 32.75 | 21.07 | 23.3 | 14.3 | 39.3 | 33.74 | 27.7 | 26.96 | 23.44 | 33.38  |
| 74616 | 'Scrn3'         | 5.88  | 6.2   | 4.47 | 3.31 | 3.72 | 5.22  | 14.2 | 2.09  | 5.81  | 2.29   |
| 74617 | 'Scpep1'        | 24.65 | 29.85 | 22.5 | 21.6 | 16.8 | 16.89 | 32.3 | 26.66 | 57.85 | 65.09  |
| 74637 | 'Shpk'          | 0.25  | 0     | 0    | 0    | 2.48 | 0     | 9    | 4.99  | 0.02  | 3.29   |
| 74644 | '4930426D05Rik' | 0     | 0     | 0.95 | 0    | 0    | 0.8   | 0    | 0     | 0     | 0      |
| 74645 | 'Tent5c'        | 0     | 2.94  | 0    | 8.46 | 0    | 1.76  | 0    | 0     | 0     | 0      |
| 74646 | 'Spsb1'         | 1.17  | 1.23  | 1.82 | 15   | 0.08 | 0.3   | 0    | 2.15  | 0     | 0.01   |
| 74648 | 'S100pbbp'      | 7.51  | 6.26  | 4.71 | 10.6 | 7.96 | 4.19  | 7.91 | 2.92  | 7.53  | 11.78  |
| 74649 | 'Cpa5'          | 0     | 0     | 3.2  | 0    | 0    | 4.66  | 0    | 0     | 0     | 0      |
| 74653 | 'Pomk'          | 29.33 | 24.24 | 24.4 | 25.5 | 20.9 | 33.74 | 39.9 | 22.7  | 23.14 | 24.71  |
| 74665 | 'Drc3'          | 18.96 | 5.83  | 13.4 | 0    | 19.3 | 13.15 | 6.83 | 6.24  | 1.23  | 5.28   |
| 74666 | '4930432K21Rik' | 7.47  | 5.21  | 3.83 | 0    | 0.02 | 1.62  | 7.56 | 2.91  | 0.06  | 18.18  |
| 74670 | 'Zfp943'        | 2.72  | 7.59  | 3.14 | 2.07 | 8.85 | 6.01  | 3.51 | 5.54  | 4.84  | 5.05   |
| 74682 | 'Wdr35'         | 26.93 | 18.25 | 18.7 | 12.8 | 17.6 | 3.92  | 13   | 26.01 | 21.78 | 17.71  |
| 74685 | 'Lrrc74b'       | 0     | 0     | 0.07 | 0.25 | 0    | 0     | 0    | 0.02  | 0.04  | 0      |
| 74691 | 'Tdrd9'         | 0     | 0     | 0.98 | 0    | 0.31 | 0     | 0    | 0     | 0     | 0      |
| 74694 | 'Tbc1d30'       | 3.03  | 6.14  | 4.41 | 1    | 0.19 | 2.36  | 0    | 0.64  | 4.37  | 1.48   |

|       |                 |       |       |      |      |      |       |      |       |       |       |
|-------|-----------------|-------|-------|------|------|------|-------|------|-------|-------|-------|
| 74711 | 'Ttl9'          | 2.34  | 4.96  | 2.4  | 8.95 | 5.22 | 11.98 | 0.03 | 2.84  | 2.51  | 3.6   |
| 74717 | 'Spata17'       | 0.38  | 0     | 0    | 0    | 0.54 | 0.14  | 0    | 0.66  | 0     | 0     |
| 74718 | 'Snx16'         | 39.56 | 22.04 | 17.9 | 33.9 | 18.8 | 32.64 | 27.6 | 39.71 | 15.83 | 20.12 |
| 74720 | 'Tmem114'       | 0     | 0     | 0    | 0    | 3.31 | 0     | 0    | 2.52  | 0     | 0     |
| 74729 | 'Setmar'        | 3.3   | 2.55  | 0    | 0    | 4.27 | 2.74  | 0.03 | 4.78  | 0     | 7.08  |
| 74732 | 'Stx11'         | 0     | 0     | 0    | 0    | 0    | 0     | 0    | 0     | 0     | 2.38  |
| 74734 | 'Rhh'           | 0.01  | 0.01  | 0.01 | 0.02 | 0.01 | 7.51  | 0    | 0     | 0.67  | 2.36  |
| 74735 | 'Trim14'        | 0.26  | 3.46  | 0.03 | 0.03 | 0.03 | 0     | 0.02 | 0     | 2.27  | 0     |
| 74737 | 'Pcf11'         | 3.63  | 1.46  | 1.25 | 3.95 | 1.71 | 1.09  | 0.32 | 2.75  | 2.4   | 0.98  |
| 74741 | 'C2cd5'         | 11.31 | 11.21 | 15.8 | 5.95 | 5.07 | 7.9   | 11   | 6     | 8.22  | 25.83 |
| 74747 | 'Ddit4'         | 1.58  | 1.44  | 5.61 | 2.39 | 3.21 | 1.2   | 3.62 | 2.09  | 0     | 1.96  |
| 74748 | 'Slamf8'        | 0     | 0.05  | 0.07 | 0.08 | 0.04 | 0.02  | 0    | 0.04  | 0     | 0     |
| 74753 | 'Trmo'          | 5.31  | 0.34  | 0.24 | 0.54 | 0.15 | 0.07  | 3.89 | 4.11  | 1.17  | 2.41  |
| 74754 | 'Dhcr24'        | 3.63  | 8.35  | 8.83 | 2.74 | 8.6  | 12.11 | 12.6 | 9.86  | 3.57  | 5.49  |
| 74760 | 'Rab3il1'       | 11.7  | 8.22  | 16.6 | 27.7 | 7.92 | 23.51 | 9.96 | 4.37  | 13    | 9.68  |
| 74761 | 'Mxra8'         | 8.48  | 7.76  | 0.06 | 4.97 | 10.7 | 30.3  | 53.5 | 0     | 35.45 | 8.07  |
| 74762 | 'Mdga1'         | 3.98  | 3.23  | 13.8 | 0    | 7.87 | 0.87  | 5    | 2.92  | 0.7   | 4.98  |
| 74763 | 'Naa60'         | 35.98 | 32.58 | 58.5 | 36.8 | 38.6 | 19.51 | 34.4 | 33.72 | 33.14 | 32.1  |
| 74764 | 'Klc4'          | 17.57 | 34.89 | 20.1 | 7.61 | 20.7 | 24.09 | 30.1 | 17.57 | 36.46 | 32.76 |
| 74766 | 'Yipf2'         | 20.77 | 25.52 | 16.4 | 6.06 | 59.1 | 34.96 | 33.5 | 36.79 | 42.86 | 30.87 |
| 74769 | 'Pik3cb'        | 0     | 0.34  | 1.38 | 1.46 | 0.05 | 0     | 0.85 | 0.33  | 0.15  | 0.06  |
| 74770 | 'Hhat1'         | 15.09 | 0.02  | 0.08 | 0    | 5.36 | 0.03  | 0    | 0     | 3.76  | 1.13  |
| 74772 | 'Atp13a2'       | 14.15 | 8.56  | 13.3 | 7.39 | 6.55 | 6.51  | 8.21 | 13.3  | 18.03 | 5.79  |
| 74775 | 'Lmbr1l'        | 0     | 1.53  | 0.02 | 2.97 | 6.81 | 0     | 0.69 | 2.57  | 0.1   | 2.61  |
| 74776 | 'Ppa2'          | 31.74 | 57.7  | 48   | 45.4 | 31.4 | 25.63 | 50.2 | 57.55 | 76.65 | 17.57 |
| 74777 | 'Selenon'       | 2.32  | 5.15  | 0.81 | 7.93 | 3.16 | 0.01  | 0.46 | 1.01  | 2.21  | 2.67  |
| 74778 | 'Rrp7a'         | 89.37 | 71.28 | 59.4 | 74.4 | 74.7 | 87.48 | 50.3 | 81.11 | 110   | 88.24 |
| 74781 | 'Wipi2'         | 38.39 | 34.14 | 44.2 | 31.8 | 15.2 | 19.28 | 57   | 29.78 | 33.84 | 11.39 |
| 74782 | 'Glt8d2'        | 3.21  | 0     | 9.98 | 0.03 | 6.99 | 0.25  | 0.16 | 2.77  | 0     | 0     |
| 74838 | 'Naa15'         | 7.61  | 2.38  | 3.74 | 2.42 | 4.83 | 0.5   | 0.78 | 1.36  | 4.08  | 1.83  |
| 74840 | 'Manf'          | 57.49 | 78.2  | 37.4 | 87.7 | 39.7 | 53.08 | 38.6 | 44.6  | 57.97 | 51.94 |
| 74841 | 'Usp38'         | 2.57  | 3.03  | 2.83 | 8.92 | 1.06 | 0.32  | 10.5 | 1.64  | 2.58  | 5.16  |
| 74843 | 'Mss51'         | 0     | 0.11  | 0    | 0    | 0    | 0.03  | 0    | 0     | 0.49  | 0     |
| 74854 | '4930402F06Rik' | 0.07  | 0     | 0    | 0    | 0    | 0     | 0    | 0     | 0     | 0     |
| 74855 | 'Fam228a'       | 1.02  | 0.25  | 0    | 0.3  | 0.19 | 0     | 0    | 1.33  | 0.06  | 0.23  |
| 74868 | 'Tmem65'        | 1.26  | 0.61  | 3.41 | 4.95 | 7.24 | 0.48  | 9.29 | 0.74  | 1.39  | 0.39  |
| 74890 | 'Morn3'         | 2.95  | 0     | 0.16 | 0    | 0    | 0     | 0    | 0     | 0     | 0     |
| 74892 | '4930447A16Rik' | 0     | 0.18  | 0    | 0    | 0    | 0     | 0    | 0     | 0     | 0     |
| 74895 | 'Ccdc181'       | 19.05 | 13.12 | 7.97 | 15.8 | 23.4 | 38.28 | 14.7 | 17.52 | 14.19 | 19.78 |
| 74901 | 'Kbtbd11'       | 8.65  | 3.45  | 4.92 | 2.39 | 5.36 | 7.62  | 8.2  | 2.27  | 5.3   | 3.37  |
| 74918 | 'Iqca'          | 0.3   | 0     | 0    | 0.21 | 0    | 0     | 0.19 | 0.3   | 0     | 0.09  |
| 74919 | 'Slc35f6'       | 25.08 | 23.19 | 17.6 | 6.02 | 13.6 | 8.43  | 9.68 | 14.22 | 22.16 | 25.44 |
| 74934 | 'Armc4'         | 0     | 0     | 0    | 0    | 0    | 0     | 0    | 0.18  | 0     | 0     |
| 74978 | 'Lrriq1'        | 4.32  | 2.32  | 3.46 | 11   | 0.46 | 4.34  | 0    | 1.25  | 1.28  | 1.33  |
| 74989 | 'Csm2os'        | 0     | 0     | 0    | 0    | 0.06 | 0     | 0.02 | 1.47  | 1.73  | 0.01  |
| 74996 | 'Usp47'         | 5.53  | 7.46  | 13.9 | 22.1 | 11.1 | 6.93  | 17.4 | 7.78  | 16.18 | 9.97  |
| 74998 | 'Rab11fip2'     | 2.66  | 1.59  | 5.16 | 6.18 | 3.53 | 3.47  | 0    | 4.07  | 2.79  | 2.89  |
| 75007 | 'Mindy1'        | 7.96  | 7.13  | 6.94 | 8.13 | 6.74 | 1.97  | 10.6 | 1.52  | 14.33 | 16.01 |
| 75011 | '4930488N24Rik' | 0     | 0     | 0    | 0    | 0    | 0     | 0.02 | 0     | 0     | 0     |
| 75013 | '4930502E18Rik' | 1.23  | 0     | 1.31 | 0    | 0    | 0     | 0    | 4.63  | 0     | 0     |
| 75015 | '4930503B20Rik' | 0.41  | 0     | 0    | 0    | 0    | 0     | 0    | 0     | 0     | 2.05  |
| 75029 | 'Purg'          | 0.25  | 0     | 4.86 | 4.7  | 2.73 | 0     | 0    | 1.26  | 1.97  | 0.06  |
| 75033 | 'Mei4'          | 3.5   | 0     | 1.18 | 0.15 | 0    | 0.88  | 0    | 3.72  | 0     | 0.18  |
| 75040 | 'Efcab10'       | 32.62 | 40.37 | 37.3 | 74.5 | 28.7 | 82.2  | 17   | 43.02 | 68.52 | 65.49 |
| 75050 | 'Kif27'         | 0.52  | 0.26  | 1.5  | 0.06 | 0.06 | 2.38  | 0.01 | 0.7   | 0.02  | 0.04  |
| 75051 | 'Ccdc173'       | 7.55  | 3.96  | 0.2  | 0.83 | 0.47 | 0.17  | 1.73 | 0.63  | 2.46  | 0.35  |
| 75062 | 'Sf3a3'         | 52.37 | 44.1  | 56.6 | 68.9 | 35.6 | 47.5  | 45.5 | 61.77 | 49.08 | 49.79 |
| 75079 | 'Zbtb49'        | 1.69  | 2.58  | 1.46 | 0    | 2.73 | 6.47  | 0    | 0.98  | 7.24  | 2.83  |

|        |                 |       |       |      |      |      |       |      |       |       |        |
|--------|-----------------|-------|-------|------|------|------|-------|------|-------|-------|--------|
| 75083  | 'Usp50'         | 0     | 0     | 0    | 0.13 | 0    | 0     | 0    | 0     | 0     | 0      |
| 75087  | '4930505A04Rik' | 0     | 0     | 0    | 0    | 1.83 | 0     | 0.06 | 0     | 0.15  | 0      |
| 75089  | 'Uhrf1bp1l'     | 5.72  | 8.93  | 18.2 | 7.14 | 4.35 | 4.52  | 3.57 | 5.78  | 9.79  | 9.03   |
| 75099  | 'Lysmd4'        | 9.54  | 5.59  | 11.9 | 3.09 | 17.2 | 14.63 | 23.9 | 14.7  | 23.96 | 8.74   |
| 75104  | 'Mmd2'          | 91.38 | 85.63 | 74   | 68.1 | 40.1 | 87.5  | 57.8 | 38.21 | 40.79 | 47.38  |
| 75106  | '4930519F16Rik' | 0     | 0.4   | 0.25 | 0    | 0.36 | 0     | 0.09 | 0     | 0     | 0      |
| 75124  | 'Nxn12'         | 4.1   | 2.27  | 0    | 4.55 | 3.05 | 0     | 0    | 1.83  | 3.73  | 0.04   |
| 75137  | 'Rprd2'         | 1.27  | 2.4   | 3.91 | 1.41 | 3.96 | 1.85  | 1.9  | 2.45  | 2.14  | 3.95   |
| 75141  | 'Rasd2'         | 17.14 | 24.27 | 10.8 | 10.2 | 12.2 | 5.92  | 3.06 | 15.54 | 17.55 | 14.37  |
| 75146  | 'Mfsd13a'       | 44.76 | 18.52 | 21.3 | 4.71 | 20.7 | 11.2  | 28.1 | 23.01 | 11.72 | 14.17  |
| 75172  | 'Ccdc146'       | 0.01  | 0     | 0    | 0    | 0.42 | 0.01  | 0    | 0.71  | 0     | 1.44   |
| 75173  | 'Tex38'         | 0     | 0.92  | 0    | 0    | 0    | 3.3   | 0    | 0     | 0     | 0      |
| 75178  | 'Meiob'         | 0.03  | 0     | 0    | 0    | 0    | 0     | 0    | 0     | 0.31  | 0      |
| 75180  | 'Tmem269'       | 0     | 0     | 6.45 | 4.89 | 2.46 | 5.21  | 0    | 5.05  | 2.01  | 0.62   |
| 751865 | 'Sap25'         | 1.41  | 2.23  | 4.94 | 0    | 8.2  | 0     | 6.11 | 1.09  | 2.92  | 0      |
| 75196  | 'Ankrd7'        | 0.44  | 0.26  | 0.25 | 0.01 | 0.52 | 0.04  | 0.02 | 0.55  | 0.01  | 0.43   |
| 75202  | 'Spaca6'        | 5.23  | 3.69  | 1.64 | 12.6 | 3.94 | 5.05  | 0.44 | 5.2   | 4.36  | 5.44   |
| 75209  | 'Sv2c'          | 5.45  | 5.91  | 3.12 | 0.95 | 0    | 0     | 1.39 | 4.4   | 1.14  | 2.12   |
| 75210  | 'Prr3'          | 35.31 | 27.35 | 32.4 | 34.8 | 15.3 | 18.43 | 33.9 | 52.53 | 29.68 | 21.63  |
| 75212  | 'Rnf121'        | 23.81 | 23.91 | 30.5 | 2.46 | 19.6 | 24.12 | 44.1 | 35.18 | 35.09 | 32.59  |
| 75216  | 'Cep128'        | 0.01  | 0.93  | 0.03 | 0    | 0    | 4.51  | 0    | 0     | 0     | 0.01   |
| 75219  | 'Dusp18'        | 1.22  | 6.89  | 15.8 | 7.28 | 3.81 | 7.35  | 7.42 | 2.06  | 0     | 9.49   |
| 75221  | 'Dpp3'          | 34.24 | 13.59 | 25.2 | 20.7 | 34.6 | 40.57 | 16.2 | 33.52 | 35.07 | 37.82  |
| 75234  | 'Rnf19b'        | 4.05  | 5.87  | 3.55 | 0.07 | 0.15 | 0.14  | 2.48 | 5.2   | 0.05  | 3.08   |
| 75258  | '4930563M21Rik' | 0     | 0.98  | 0.71 | 1.44 | 0    | 0     | 0    | 0     | 0     | 0      |
| 75266  | 'Tomm20l'       | 0     | 3.85  | 0    | 0    | 0    | 0     | 0    | 0     | 0     | 0      |
| 75273  | 'Pelp1'         | 8.32  | 6.07  | 5.52 | 0.18 | 5.98 | 4.08  | 6.56 | 1.78  | 10.8  | 7.94   |
| 75275  | 'Tmco5b'        | 0     | 0     | 0    | 0    | 0    | 2.74  | 0    | 0     | 0     | 0      |
| 75284  | 'Bcdin3d'       | 19.65 | 13.89 | 8.27 | 7.75 | 7.67 | 6.25  | 6.71 | 3.29  | 10.92 | 17.53  |
| 75288  | 'Slc35f4'       | 25.63 | 14.23 | 4.03 | 10.9 | 6.83 | 27.66 | 21.4 | 21.37 | 24.81 | 15.49  |
| 75291  | 'Zbtb3'         | 6.76  | 3.07  | 2.66 | 0    | 0.03 | 0     | 4.4  | 3.33  | 1.89  | 0      |
| 75292  | 'Prkd3'         | 0.45  | 0     | 1.9  | 2.71 | 0.66 | 0     | 0    | 0     | 1.57  | 0.21   |
| 75296  | 'Fgfr1op'       | 13.09 | 7.75  | 6.67 | 6.77 | 16.9 | 4.9   | 11.9 | 11.1  | 4.09  | 13.11  |
| 75302  | 'Asxl2'         | 1.39  | 3.28  | 2.16 | 2.92 | 2.76 | 2.89  | 3.38 | 0.92  | 0.99  | 3.44   |
| 75304  | '4930563E22Rik' | 4.04  | 5.95  | 4.56 | 5.68 | 5.59 | 4.95  | 1.75 | 5.71  | 9.35  | 5.86   |
| 75305  | 'Ankrd53'       | 0.51  | 0.25  | 0    | 0    | 0    | 0     | 0    | 0     | 0     | 0      |
| 75311  | '4930550C14Rik' | 0.72  | 0.12  | 0    | 0    | 0.3  | 0     | 0.47 | 0.83  | 1.28  | 0      |
| 75316  | 'Taf1d'         | 17.19 | 8.61  | 17.5 | 32.4 | 11.8 | 12.37 | 12.3 | 7.06  | 17.25 | 6.8    |
| 75317  | 'Parpbp'        | 0     | 0     | 1.29 | 0    | 1.21 | 0     | 0    | 1.39  | 0     | 0      |
| 75320  | 'Etnk1'         | 10.18 | 4.4   | 12.2 | 20.9 | 10.1 | 12.92 | 23.9 | 4.28  | 6.7   | 13.14  |
| 75329  | 'Atf7ip2'       | 0     | 0     | 2    | 0    | 0    | 0     | 0    | 0.55  | 0     | 0      |
| 75339  | 'Mphosph8'      | 20.45 | 10.06 | 14.9 | 26.4 | 29.9 | 32.01 | 24.9 | 13.66 | 19.28 | 24.91  |
| 75345  | 'Slamf7'        | 0     | 0     | 0    | 2.26 | 0    | 0     | 0    | 0     | 0     | 0      |
| 75368  | '4930558K02Rik' | 0     | 0     | 0.03 | 0    | 1.67 | 0     | 0.03 | 0.04  | 0     | 0      |
| 75387  | 'Sirt4'         | 15.42 | 17.7  | 17.4 | 13.4 | 9.22 | 40.87 | 16.6 | 10.55 | 13.7  | 23.73  |
| 75396  | 'Spp2'          | 0     | 0     | 0.1  | 0    | 9.32 | 0     | 0    | 0     | 0     | 2.49   |
| 75398  | 'Mrpl32'        | 55.39 | 63.54 | 38.8 | 45.5 | 79.4 | 38.58 | 65.7 | 65.68 | 45.37 | 76.25  |
| 75404  | 'Arhgap36'      | 187   | 304.2 | 39.9 | 5.16 | 31.8 | 50.14 | 10   | 162.4 | 48.14 | 124.27 |
| 75406  | 'Ndufs7'        | 560.6 | 471.1 | 596  | 520  | 676  | 976.1 | 528  | 550.3 | 535.9 | 564.25 |
| 75409  | 'Slitrk5'       | 10.49 | 3.12  | 0.23 | 2.42 | 7.82 | 0.81  | 0.7  | 7.8   | 4.92  | 4.77   |
| 75410  | 'Kmt2b'         | 1.37  | 0.82  | 0.67 | 2.15 | 0.84 | 0.03  | 4.48 | 0.58  | 2.2   | 0.31   |
| 75415  | 'Arhgap12'      | 12.87 | 9.54  | 14.7 | 14.1 | 9.17 | 12.84 | 17.8 | 10.65 | 19.34 | 16.37  |
| 75416  | 'Nop14'         | 5.32  | 17.9  | 10.1 | 10.6 | 18   | 6.95  | 16.4 | 13.78 | 14.1  | 14.42  |
| 75420  | 'Secisbp2'      | 14.82 | 9.3   | 12.3 | 16.9 | 5.12 | 10.51 | 19.6 | 8.8   | 14.63 | 7.04   |
| 75422  | 'Mettl5'        | 32.78 | 17.79 | 24.3 | 48.5 | 39.5 | 49.88 | 32.8 | 33.31 | 36.93 | 34.13  |
| 75423  | 'Arl5a'         | 2.13  | 2.23  | 7.43 | 0.22 | 4.17 | 3.11  | 1.46 | 3.6   | 0.99  | 0.83   |
| 75424  | 'Zfp820'        | 0.08  | 0.17  | 0.11 | 0.06 | 0.07 | 0.19  | 0.2  | 0.16  | 0.03  | 1.11   |
| 75425  | 'Tti1'          | 2.91  | 3.42  | 7.9  | 3.82 | 5.8  | 3.88  | 0.6  | 5.87  | 5.56  | 8.06   |

|       |                 |       |       |      |      |      |       |      |       |       |        |
|-------|-----------------|-------|-------|------|------|------|-------|------|-------|-------|--------|
| 75426 | 'Igfbp11'       | 0     | 7.46  | 0    | 0    | 2.9  | 1.06  | 5.12 | 0     | 0     | 0      |
| 75429 | 'Fam183b'       | 214.1 | 152.5 | 32.5 | 234  | 104  | 181.9 | 59.5 | 53.72 | 60.63 | 186.83 |
| 75430 | 'Anapc15'       | 13.46 | 12.79 | 33.6 | 29.8 | 4.85 | 5.23  | 18.6 | 12.83 | 6.46  | 8.07   |
| 75434 | '1700001C02Rik' | 0     | 0     | 0    | 0    | 2.83 | 0     | 0    | 4.48  | 0     | 0      |
| 75444 | 'Ccdc192'       | 0     | 0     | 0.06 | 6.87 | 0    | 0     | 0    | 0.24  | 2.41  | 0      |
| 75452 | 'Ascc2'         | 6.86  | 7.93  | 5.11 | 7.33 | 2.45 | 8.45  | 11.2 | 6.48  | 3.45  | 4.13   |
| 75454 | 'Phpt1'         | 141.6 | 114   | 186  | 202  | 96.2 | 126.2 | 154  | 133.3 | 109.4 | 177.39 |
| 75458 | 'Cklf'          | 4.2   | 4.22  | 6.72 | 9.6  | 8.42 | 0.02  | 3.86 | 2.82  | 0     | 4.93   |
| 75459 | 'Syce3'         | 0     | 0     | 0.12 | 0    | 0    | 0     | 0    | 0     | 0     | 0      |
| 75465 | 'Dynlrb2'       | 0     | 0     | 0    | 9.9  | 16.8 | 26.05 | 0    | 2.6   | 6.36  | 12.23  |
| 75469 | 'Spata19'       | 0     | 0     | 0.08 | 0    | 0    | 5.18  | 0    | 1.32  | 0     | 2.89   |
| 75470 | 'Iqcf5'         | 0     | 0     | 0    | 0    | 4.16 | 0     | 0    | 0     | 0     | 0      |
| 75472 | 'Cfap126'       | 0.1   | 14.53 | 0    | 17.7 | 4.24 | 14.21 | 0    | 5.75  | 0     | 7.16   |
| 75475 | 'Oplah'         | 3.58  | 4.65  | 7.82 | 0    | 0.98 | 0     | 5.67 | 5.11  | 2.64  | 2.11   |
| 75477 | 'Pfn3'          | 0     | 0     | 3.1  | 0    | 0    | 8.04  | 0    | 3.25  | 0     | 2.69   |
| 75480 | '1700003F12Rik' | 0     | 1.6   | 6.6  | 0    | 2.41 | 3.63  | 3.04 | 3.55  | 28.07 | 12.77  |
| 75495 | 'Morn5'         | 0     | 9.29  | 0    | 0    | 0    | 0.29  | 0    | 6.43  | 0     | 2.86   |
| 75497 | 'Fabp12'        | 0     | 0     | 0    | 0    | 0    | 0     | 0    | 0     | 1.06  | 0      |
| 75504 | '1700013F07Rik' | 8.98  | 3.26  | 3.18 | 7.6  | 1.98 | 1.02  | 6.34 | 4.89  | 2.63  | 9.08   |
| 75507 | 'Pou5f2'        | 0.03  | 0     | 0    | 0    | 0    | 0     | 0    | 0     | 1.91  | 0      |
| 75516 | 'Ttc32'         | 4.38  | 1.39  | 3.91 | 0    | 2.29 | 7.42  | 4.42 | 3.85  | 5.49  | 10.18  |
| 75526 | 'Eppin'         | 0     | 5.32  | 0    | 0    | 0    | 0     | 0    | 0     | 0     | 0      |
| 75528 | 'Tex29'         | 0     | 0.12  | 0.16 | 0    | 0    | 0.12  | 0    | 0     | 0     | 0      |
| 75530 | 'Lymr7'         | 11.05 | 10.07 | 8.33 | 6.03 | 9.3  | 8.78  | 11.8 | 9.15  | 13.78 | 4.93   |
| 75533 | 'Nme5'          | 35.52 | 19.88 | 26.2 | 101  | 46.9 | 69.19 | 8.3  | 31.53 | 6.86  | 35.31  |
| 75538 | 'Fam71e1'       | 12.74 | 6.78  | 11.2 | 19.7 | 14.4 | 9.05  | 5.43 | 11.77 | 9.59  | 5.41   |
| 75540 | 'Fpgt'          | 3.77  | 2.11  | 2.99 | 8.77 | 0.71 | 0.26  | 18.9 | 7.44  | 0.43  | 2.21   |
| 75541 | 'Nat8f4'        | 1.76  | 8.33  | 3.58 | 0    | 9.65 | 7.78  | 0.02 | 1.79  | 0.01  | 8.13   |
| 75547 | 'Akap13'        | 0.47  | 1.08  | 0.69 | 0.21 | 1.3  | 0.73  | 0    | 0.88  | 1.9   | 1.79   |
| 75552 | 'Paqr9'         | 4.34  | 10.29 | 5.26 | 3.62 | 4.45 | 6.91  | 11   | 0.88  | 1.5   | 3.24   |
| 75553 | 'Zc3h14'        | 10.6  | 10.3  | 8.16 | 16.7 | 6.04 | 8.36  | 11.6 | 11.14 | 7.06  | 15.84  |
| 75555 | '1700020D05Rik' | 0     | 0     | 0    | 0    | 0    | 0     | 0    | 2.2   | 0     | 0      |
| 75556 | 'Cfap161'       | 17.16 | 12.04 | 2.37 | 16.5 | 1.05 | 21.08 | 6.81 | 8.92  | 5.08  | 3.3    |
| 75558 | 'Spata45'       | 0     | 0     | 0    | 0    | 0.65 | 0     | 0    | 0     | 0     | 0      |
| 75560 | 'Ep400'         | 6.06  | 4.21  | 6.13 | 4.21 | 9.06 | 3.38  | 7.6  | 3.79  | 3.51  | 8.64   |
| 75563 | 'Dnali1'        | 0     | 0     | 0    | 0    | 3.78 | 0     | 0    | 0.02  | 0.53  | 3.72   |
| 75564 | 'Rsph9'         | 121.1 | 154.7 | 142  | 155  | 194  | 140   | 78.4 | 98.3  | 104.4 | 193.05 |
| 75565 | 'Sgf29'         | 13.6  | 12.32 | 28.1 | 50.7 | 29.3 | 25.12 | 31.5 | 23.13 | 57.96 | 28.33  |
| 75568 | 'Capsl'         | 2.58  | 3.78  | 2.7  | 6.73 | 0.22 | 16.3  | 0    | 5.61  | 0     | 4.08   |
| 75570 | 'Nhej1'         | 2.99  | 6.9   | 1.78 | 0    | 2.23 | 0.24  | 5.71 | 8.66  | 4.87  | 9.58   |
| 75571 | 'Spata9'        | 0.98  | 3.47  | 0.46 | 0.91 | 0    | 13.57 | 0.15 | 0     | 2.48  | 0.25   |
| 75572 | 'Acyp2'         | 40.64 | 59.65 | 44.4 | 57.3 | 66.3 | 105.5 | 64.5 | 80.64 | 74.95 | 67.36  |
| 75578 | 'Fgyy'          | 13.4  | 12.85 | 18.4 | 31.4 | 14.5 | 27.35 | 28.6 | 29.93 | 40.79 | 14.63  |
| 75580 | 'Zbtb4'         | 3.23  | 1.09  | 3.57 | 1.37 | 3.47 | 4.71  | 1.95 | 4.02  | 2.41  | 2.88   |
| 75581 | 'Yipf7'         | 0.04  | 0     | 0.44 | 0    | 0.08 | 0.15  | 0.04 | 0.03  | 0.04  | 0.07   |
| 75590 | 'Dusp9'         | 0     | 0     | 0    | 0    | 0    | 0     | 0    | 0.38  | 0     | 0      |
| 75593 | 'Malsu1'        | 23.48 | 23.19 | 13.3 | 17   | 20.2 | 16.92 | 25.5 | 16.22 | 13.69 | 25.06  |
| 75597 | 'Ndufaf2'       | 67.01 | 43.62 | 77.3 | 23   | 35.3 | 26.7  | 61.6 | 26.01 | 50.72 | 56.02  |
| 75599 | 'Pcdh1'         | 3.91  | 0.46  | 2.05 | 2.69 | 2.38 | 3.82  | 0.27 | 0     | 1.1   | 0.48   |
| 75600 | 'Calm14'        | 0.2   | 0     | 0    | 0    | 0.21 | 0     | 0    | 0.6   | 0     | 0      |
| 75604 | 'Tm4sf5'        | 22.36 | 3.32  | 2.46 | 24.2 | 8.22 | 15.64 | 3.78 | 10.48 | 13.99 | 6.92   |
| 75605 | 'Kdm5b'         | 4.89  | 2.83  | 8.44 | 10.5 | 9.04 | 3.21  | 4.71 | 3.38  | 2.24  | 1.62   |
| 75607 | 'Wnk2'          | 1.53  | 2.55  | 3.39 | 7.06 | 1.62 | 1.68  | 6.69 | 4.2   | 5.42  | 1.81   |
| 75608 | 'Chmp4b'        | 6.85  | 7.07  | 3.63 | 9.97 | 5.79 | 13.94 | 11.9 | 3.96  | 8.13  | 6.62   |
| 75610 | '2010109A12Rik' | 0.27  | 0.38  | 0    | 0    | 0    | 4.74  | 0    | 0     | 0     | 0      |
| 75612 | 'Gns'           | 12.9  | 16.12 | 23   | 23.4 | 19.8 | 3.99  | 17.2 | 9.55  | 20.51 | 4.46   |
| 75613 | 'Med25'         | 3.66  | 20.04 | 16.7 | 9.14 | 9.46 | 15.68 | 11.4 | 6.02  | 20.73 | 4.91   |
| 75616 | 'Smim15'        | 12.65 | 11.41 | 6.48 | 11.3 | 9.2  | 19.89 | 19.6 | 5.2   | 11.59 | 6.48   |



|       |                 |       |       |      |      |      |       |      |       |       |        |
|-------|-----------------|-------|-------|------|------|------|-------|------|-------|-------|--------|
| 75617 | 'Rps25'         | 375.9 | 401.6 | 447  | 451  | 325  | 464.3 | 372  | 224.5 | 490.2 | 329.69 |
| 75619 | 'Fastkd2'       | 34.59 | 12.63 | 19.6 | 7.7  | 2.51 | 1.58  | 4.81 | 14.14 | 10.38 | 9.84   |
| 75620 | 'Kxd1'          | 51.82 | 40.83 | 52.2 | 60.2 | 19.4 | 15.42 | 27.9 | 43.42 | 31.1  | 45.63  |
| 75623 | 'Tex30'         | 8.92  | 19.98 | 11.4 | 16.7 | 3.19 | 0.04  | 9.66 | 15.85 | 10.16 | 5.39   |
| 75624 | 'Metap1'        | 24.33 | 52.41 | 39   | 41.8 | 28.3 | 17.86 | 29.5 | 17.97 | 9.69  | 17.09  |
| 75625 | 'Mageh1'        | 93.46 | 96.92 | 52.6 | 17.8 | 44.4 | 49.06 | 94.7 | 78.65 | 127.5 | 97.91  |
| 75627 | 'Snapc1'        | 38.85 | 28.79 | 23.4 | 31.9 | 18.5 | 22.76 | 43.7 | 36.47 | 26.23 | 59.14  |
| 75641 | '1700029I15Rik' | 0.29  | 0.15  | 0    | 0.19 | 1.58 | 0     | 0.81 | 0     | 2.27  | 0.14   |
| 75646 | 'Rai14'         | 0.83  | 0     | 0    | 0    | 0    | 0     | 0.08 | 0.94  | 0     | 0.05   |
| 75647 | 'Ssmem1'        | 0     | 0     | 0    | 0    | 0    | 0     | 1.03 | 0     | 0     | 0      |
| 75657 | 'Speer4a'       | 0     | 0.17  | 0    | 2.31 | 0.03 | 0     | 0    | 0     | 0     | 1      |
| 75659 | 'Wdr54'         | 32.88 | 30.57 | 47.8 | 38.6 | 45   | 34.78 | 35.7 | 30.78 | 29.47 | 59.3   |
| 75660 | 'Lin37'         | 67.21 | 33.74 | 38.1 | 65.4 | 47.6 | 42.67 | 24.6 | 42.75 | 74.84 | 61.44  |
| 75665 | 'Bicd11'        | 5.93  | 11.25 | 7.23 | 6.8  | 6.27 | 11.02 | 4.12 | 10.6  | 13.76 | 0.49   |
| 75668 | 'Rasl10a'       | 0     | 1.05  | 0    | 0    | 1.23 | 0     | 0    | 6.9   | 0     | 0      |
| 75669 | 'Pik3r4'        | 6.86  | 9.19  | 12.7 | 4.87 | 3.71 | 0.37  | 10.1 | 2.76  | 5.75  | 2.86   |
| 75671 | 'Tex22'         | 0     | 0     | 0    | 0    | 0    | 0     | 0    | 0.05  | 0     | 0.14   |
| 75677 | 'Cldn22'        | 0     | 0     | 0.85 | 0    | 0    | 0     | 0    | 0     | 0     | 0      |
| 75678 | 'lppk'          | 7.72  | 9.31  | 9.69 | 9.92 | 4.49 | 8.03  | 13.3 | 16.33 | 3.13  | 3.92   |
| 75686 | 'Nudt16'        | 20.88 | 19.72 | 22.4 | 15.2 | 42.1 | 33.89 | 16.6 | 45.83 | 28.16 | 39.17  |
| 75687 | 'Ripor1'        | 11.54 | 14.79 | 37   | 29   | 14.9 | 6.26  | 9.96 | 13.25 | 27.6  | 16.95  |
| 75689 | 'Higd1b'        | 0     | 0     | 0    | 1.94 | 0    | 0     | 0    | 0     | 0     | 0      |
| 75690 | 'Vsig10l'       | 2.4   | 6.37  | 1.07 | 0    | 4.24 | 0     | 0    | 1.5   | 5.24  | 0.89   |
| 75691 | 'Anks6'         | 0.06  | 0.08  | 1.67 | 3.61 | 0    | 0.33  | 0.54 | 0     | 1     | 0.42   |
| 75692 | 'Nr2c2ap'       | 28.83 | 17.88 | 29.1 | 0    | 19.9 | 27.41 | 2.94 | 40.35 | 40.54 | 69.06  |
| 75695 | 'Rilpl1'        | 18.17 | 3.71  | 9.29 | 5.69 | 7.76 | 8.85  | 2.18 | 14.18 | 13.73 | 6.46   |
| 75697 | 'C2cd4b'        | 0     | 1.05  | 0.23 | 9.58 | 0    | 0.37  | 0    | 0.37  | 0     | 0.14   |
| 75698 | 'Shld2'         | 0     | 0     | 0    | 0    | 1.26 | 1.91  | 0    | 0.75  | 0     | 0.69   |
| 75705 | 'Eif4b'         | 22.63 | 27.97 | 37.9 | 40.5 | 31.9 | 18.87 | 20.8 | 18.86 | 30.27 | 22.05  |
| 75710 | 'Rbm12'         | 2.25  | 5.32  | 2.76 | 3.56 | 6.34 | 3.01  | 9.62 | 8.58  | 3.66  | 6.15   |
| 75712 | 'Tmem14a'       | 53.9  | 30.57 | 33.2 | 61.8 | 38.4 | 56.05 | 48.8 | 30.78 | 22.33 | 67.02  |
| 75717 | 'Cul5'          | 16.19 | 11.5  | 12.9 | 12.3 | 9.67 | 10.82 | 10.4 | 5.18  | 9.48  | 8.43   |
| 75718 | 'Vwa5b1'        | 2.49  | 2.47  | 4.35 | 0.01 | 5.59 | 4     | 2.72 | 3.28  | 4.09  | 3.54   |
| 75723 | 'Amotl1'        | 8.09  | 16.01 | 13.8 | 9.6  | 9.57 | 3.92  | 7.64 | 11.1  | 10.16 | 13.17  |
| 75725 | 'Phf14'         | 7.7   | 6.08  | 3.31 | 10.5 | 1.37 | 0.39  | 9.97 | 6.36  | 5.37  | 2.86   |
| 75729 | 'Fam227a'       | 1.61  | 3.37  | 3.9  | 8    | 5.05 | 4.19  | 6.05 | 0.66  | 0.47  | 0      |
| 75731 | 'ldnk'          | 33.19 | 48.2  | 25.6 | 28.3 | 17.5 | 52.26 | 11.2 | 37.08 | 41.42 | 39.33  |
| 75732 | 'lqcd'          | 0     | 0.61  | 1.08 | 2.38 | 0    | 2.18  | 0    | 1.31  | 0.28  | 0.01   |
| 75734 | 'Mff'           | 249   | 260.1 | 245  | 296  | 192  | 237.7 | 295  | 290.9 | 223.8 | 234.55 |
| 75735 | 'Pank1'         | 1.82  | 0.46  | 0.94 | 1.8  | 2.19 | 0.04  | 1.99 | 0.98  | 0.63  | 2.54   |
| 75736 | 'Bcl2l12'       | 5.77  | 0     | 3.25 | 0    | 0    | 0     | 5.23 | 0     | 0     | 0.9    |
| 75739 | 'Mpp7'          | 2.89  | 5.15  | 0.35 | 0.1  | 0.12 | 0.08  | 0.02 | 2.21  | 0.11  | 2.88   |
| 75740 | 'Egfem1'        | 7.48  | 4.05  | 0.3  | 9.63 | 12.5 | 2.28  | 8.11 | 6.12  | 1.47  | 2.7    |
| 75744 | 'Svip'          | 14.68 | 19.97 | 9.48 | 8.8  | 27.8 | 6     | 11.9 | 9.7   | 11.88 | 11.94  |
| 75746 | 'Morc4'         | 1.74  | 0.04  | 0.35 | 0    | 1.58 | 1.29  | 0.82 | 1.14  | 0.87  | 0      |
| 75747 | 'Sesn3'         | 9.2   | 2.27  | 4.94 | 0.82 | 6.02 | 3.42  | 7.69 | 5.44  | 2.22  | 0.1    |
| 75750 | 'Slc10a6'       | 0     | 0.43  | 0    | 0    | 0    | 0     | 1.01 | 0     | 0     | 0      |
| 75751 | 'lpo4'          | 29.31 | 41.53 | 44.3 | 32   | 38.4 | 23.07 | 55.7 | 39.18 | 25.64 | 46.27  |
| 75758 | '9130401M01Rik' | 33.73 | 21.17 | 31   | 28.5 | 50.9 | 50.6  | 68.9 | 28.13 | 30.44 | 38.71  |
| 75763 | 'Dcaf17'        | 8.71  | 8.06  | 4.67 | 7.75 | 13.9 | 9.1   | 8.16 | 1.5   | 13.91 | 14.11  |
| 75764 | 'Slx1b'         | 3.71  | 4.67  | 5.68 | 6.56 | 4.83 | 11.85 | 13   | 5.41  | 4.98  | 2.26   |
| 75766 | 'Dcstamp'       | 0     | 0     | 0    | 0    | 0    | 0     | 0    | 2     | 0     | 0      |
| 75767 | 'Rab11fip1'     | 0.04  | 0.01  | 0.09 | 0.06 | 0.75 | 0.01  | 0.06 | 0.01  | 0.55  | 0.06   |
| 75769 | 'Plppr5'        | 4.17  | 1.52  | 3.49 | 1.25 | 0.65 | 0.08  | 0    | 2.76  | 2.5   | 0.38   |
| 75770 | 'Brsk2'         | 1.05  | 3.08  | 7.44 | 5.1  | 4.51 | 4.39  | 7.01 | 3.94  | 1.7   | 3.51   |
| 75778 | 'Them4'         | 47.85 | 25.93 | 30.8 | 19.5 | 17.4 | 11.45 | 15.8 | 23.31 | 42.56 | 14.79  |
| 75782 | 'Lca5'          | 1.67  | 0.98  | 3.5  | 2.75 | 1    | 0.01  | 0    | 2.05  | 0.56  | 3.35   |
| 75785 | 'Klhl24'        | 2.3   | 7.34  | 5.49 | 7.58 | 6.98 | 6.24  | 1    | 5.32  | 4.6   | 10.83  |

|       |                 |       |       |      |      |      |       |      |       |       |       |
|-------|-----------------|-------|-------|------|------|------|-------|------|-------|-------|-------|
| 75786 | 'Ckap5'         | 12.56 | 6.06  | 9.91 | 12.1 | 16.1 | 7.4   | 7    | 6.79  | 5.76  | 13.78 |
| 75788 | 'Smurf1'        | 0.27  | 1.98  | 2.49 | 2.8  | 2.58 | 0.39  | 1.47 | 0.93  | 0.01  | 0.17  |
| 75796 | 'Cdy12'         | 4.71  | 2.8   | 2.57 | 5.23 | 8.13 | 3.2   | 0.17 | 4.8   | 5.42  | 11.88 |
| 75799 | '4930444P10Rik' | 2.28  | 1.34  | 0    | 0    | 0.3  | 0     | 1.8  | 0.34  | 14.32 | 1.42  |
| 75801 | '4930447C04Rik' | 6.7   | 3.26  | 1.29 | 5.73 | 6.01 | 7.89  | 1.71 | 2.55  | 6.18  | 6.64  |
| 75805 | 'Nln'           | 8.22  | 11.43 | 15.2 | 5.48 | 12.8 | 1.02  | 0.82 | 11.93 | 6.36  | 2.36  |
| 75812 | 'Tasp1'         | 9.71  | 17.48 | 19.9 | 20.8 | 27.6 | 28.47 | 6.67 | 38.38 | 39.94 | 25.78 |
| 75820 | 'Wdr64'         | 0.71  | 0     | 0    | 0    | 0    | 0     | 0    | 0     | 0     | 0.71  |
| 75823 | 'Fam227b'       | 0     | 0     | 0.06 | 4.17 | 0    | 0     | 0    | 0     | 0.06  | 0     |
| 75826 | 'Senp2'         | 5.83  | 11.2  | 6.82 | 12   | 1.9  | 3.75  | 6.03 | 9.47  | 10.74 | 7.52  |
| 75841 | 'Rnf139'        | 3.77  | 9.34  | 8.26 | 7.84 | 1.73 | 4.02  | 0.13 | 1.14  | 3.48  | 3.96  |
| 75847 | 'Ispd'          | 6.86  | 15.83 | 12   | 12.3 | 4.08 | 13.41 | 4.92 | 16.23 | 17.5  | 4.13  |
| 75860 | 'Tex26'         | 3.93  | 0     | 5.01 | 0    | 4.46 | 0     | 0.03 | 0     | 0     | 4.31  |
| 75869 | 'Arl5b'         | 3.06  | 1.72  | 3.17 | 0.02 | 0.45 | 0.73  | 0.88 | 1.15  | 0.73  | 0.16  |
| 75870 | 'Tcam1'         | 0     | 0     | 0    | 0    | 0    | 0     | 0    | 0     | 0.01  | 0     |
| 75871 | 'Zfp821'        | 2.33  | 5.84  | 2.85 | 41.6 | 14.4 | 15.15 | 7.4  | 12.68 | 7.98  | 5.54  |
| 75894 | 'Adal'          | 15.21 | 5.39  | 12.2 | 7.44 | 20.5 | 9.56  | 21.5 | 15.97 | 9.25  | 9.82  |
| 75901 | 'Dcp1a'         | 0     | 2.91  | 5.39 | 4.36 | 1.29 | 3.38  | 0.01 | 1.86  | 8.82  | 2.19  |
| 75906 | 'Fam184a'       | 1.71  | 3.19  | 2.16 | 7.41 | 0.42 | 3.4   | 0.08 | 0.34  | 2.65  | 1.9   |
| 75909 | 'Vmp1'          | 70.84 | 83.9  | 74.2 | 57.6 | 82.4 | 92.74 | 62.6 | 75.59 | 81.76 | 69.6  |
| 75914 | 'Exoc6b'        | 11.55 | 8.35  | 30.8 | 19.8 | 10.3 | 5.98  | 11.8 | 7.36  | 16.51 | 20.08 |
| 75939 | '4930579G24Rik' | 0.14  | 0.24  | 0.13 | 7.09 | 0.35 | 0.21  | 0.16 | 1.31  | 0.33  | 4.39  |
| 75953 | 'Samd7'         | 1.43  | 2.33  | 0    | 0    | 0    | 2.68  | 0    | 0     | 0.01  | 0     |
| 75956 | 'Srrm2'         | 54.77 | 45.75 | 71.1 | 86.1 | 113  | 27.3  | 44.5 | 24.9  | 86.69 | 49.64 |
| 75964 | 'Trappc8'       | 0.92  | 1.2   | 0.69 | 1.3  | 0.96 | 0     | 0.4  | 1.11  | 1.04  | 0.01  |
| 75965 | 'Zdhhc20'       | 34.74 | 22.28 | 16.6 | 27   | 17   | 15.39 | 15.2 | 27.24 | 25.83 | 17.64 |
| 75973 | 'Ccdc162'       | 0.04  | 0.01  | 0.13 | 0    | 0    | 0     | 0    | 0     | 0.07  | 0     |
| 75974 | 'Dock11'        | 0.59  | 2.97  | 1.68 | 1.67 | 0.72 | 0.88  | 0.01 | 0.52  | 0.05  | 4.15  |
| 75985 | 'Rab30'         | 1     | 5.28  | 5.61 | 14.5 | 3.68 | 14.61 | 10.2 | 1.3   | 3.24  | 0.16  |
| 75991 | 'Slain2'        | 0.02  | 0.04  | 1.17 | 0.03 | 1.43 | 0.35  | 0    | 1.4   | 0.2   | 0.65  |
| 76007 | 'Zmym2'         | 5.43  | 4.77  | 6.21 | 14.2 | 4.62 | 4.98  | 5.39 | 3.15  | 11.31 | 6.26  |
| 76014 | 'Zc3h18'        | 4.03  | 1.91  | 1.84 | 4.87 | 3.8  | 3.06  | 3.84 | 6.16  | 1.21  | 2.8   |
| 76022 | 'Gon4l'         | 9.36  | 9.63  | 7.77 | 11.2 | 9.06 | 16.53 | 10.7 | 7.17  | 12.37 | 12.92 |
| 76025 | 'Cant1'         | 19.52 | 10.88 | 26.1 | 13.3 | 20.7 | 21.57 | 36.5 | 31.53 | 29.14 | 22.06 |
| 76041 | 'Ccdc125'       | 0.06  | 0.16  | 0    | 0    | 0    | 0     | 0.75 | 0     | 1.31  | 0     |
| 76044 | 'Ncapg2'        | 0     | 0.01  | 0    | 0    | 0    | 0     | 0    | 0     | 0     | 0.6   |
| 76051 | 'Ganc'          | 2.44  | 1.63  | 1.17 | 0    | 3.29 | 1.12  | 0    | 1.19  | 1.6   | 0.22  |
| 76055 | 'Mgea5'         | 11.44 | 12    | 14.3 | 24.9 | 4.99 | 14.65 | 11.2 | 7.92  | 28.63 | 7.99  |
| 76071 | 'Jakmip1'       | 38.83 | 37.24 | 43.6 | 43.3 | 32   | 31.76 | 65.1 | 23.72 | 29.91 | 22.71 |
| 76072 | 'Rnf183'        | 2.69  | 0     | 0    | 0    | 0    | 0     | 0    | 0     | 0     | 0     |
| 76073 | 'Pcgf5'         | 18.49 | 10.97 | 4.16 | 15.6 | 7.63 | 19.58 | 11.7 | 5.41  | 6.18  | 23.11 |
| 76074 | 'Gbp8'          | 0     | 0     | 0    | 0.02 | 0.31 | 0     | 0    | 0     | 0     | 0     |
| 76080 | 'Ttpal'         | 5.45  | 3.02  | 4.33 | 0.01 | 8.7  | 2.66  | 3.49 | 3.7   | 6.31  | 14.94 |
| 76088 | 'Dock8'         | 0     | 0     | 0    | 0    | 0.01 | 0.02  | 0    | 0     | 2.12  | 1.52  |
| 76089 | 'Rapgef2'       | 2.67  | 4.97  | 5.61 | 2.3  | 3.9  | 3.4   | 4.66 | 2.65  | 3.95  | 3.16  |
| 76108 | 'Rap2a'         | 5.77  | 6.01  | 0.81 | 13.8 | 7.08 | 1.04  | 6.66 | 2.39  | 4.07  | 4.4   |
| 76113 | 'Lpo'           | 3.62  | 1.07  | 0.02 | 0    | 0    | 0     | 0    | 3.54  | 0     | 2.44  |
| 76117 | 'Arhgap15'      | 23.57 | 18.19 | 28.2 | 48.4 | 39   | 41.18 | 31.6 | 14.2  | 32.1  | 23.81 |
| 76123 | 'Gpsm2'         | 0     | 1.35  | 0    | 5.23 | 0    | 0.05  | 0.02 | 0.03  | 0     | 1.73  |
| 76130 | 'Las1l'         | 23.28 | 31.22 | 54   | 62.7 | 48.6 | 25.73 | 33.4 | 40.41 | 29.75 | 26.6  |
| 76131 | 'Depdc1a'       | 0     | 0     | 0.58 | 0    | 0    | 0     | 0    | 0     | 0     | 0.32  |
| 76132 | 'Faxc'          | 1.36  | 0.98  | 1.6  | 0.47 | 0.31 | 1.76  | 0.48 | 0.58  | 2.23  | 1.52  |
| 76137 | 'Mcur1'         | 4.66  | 1.33  | 2.5  | 0    | 3.38 | 0.02  | 1.93 | 0.54  | 0.04  | 0.06  |
| 76138 | 'Ccdc138'       | 5.96  | 1.57  | 3.45 | 3.54 | 3.98 | 5.13  | 3.11 | 2.69  | 3.61  | 0.63  |
| 76142 | 'Ppp1r14c'      | 10.78 | 15.24 | 16.3 | 24   | 4.81 | 8.24  | 27   | 11.65 | 16.88 | 9.2   |
| 76156 | 'Fam131b'       | 0.18  | 0     | 0.01 | 0    | 1.09 | 3.16  | 0.2  | 0.73  | 0     | 0     |
| 76157 | 'Slc35d3'       | 0     | 3.85  | 0    | 0    | 0    | 0     | 0    | 1     | 0     | 0     |
| 76161 | 'Lamp5'         | 27.31 | 74.64 | 0.75 | 18.3 | 0.08 | 0.07  | 74.6 | 167.9 | 0.03  | 0.67  |

|       |                 |       |       |      |      |      |       |      |       |       |        |
|-------|-----------------|-------|-------|------|------|------|-------|------|-------|-------|--------|
| 76166 | 'Rsg1'          | 1.64  | 0     | 6.57 | 8.01 | 9.47 | 10.76 | 5.65 | 7.78  | 1.98  | 8.27   |
| 76167 | 'Snrnp35'       | 10.6  | 14.97 | 9.03 | 11   | 14.6 | 1.6   | 17.6 | 12.71 | 3.73  | 19.44  |
| 76178 | 'Coa5'          | 28    | 29.89 | 41.2 | 23.3 | 31.9 | 12.1  | 32.4 | 21.31 | 22.38 | 34.69  |
| 76179 | 'Usp31'         | 0.86  | 2.47  | 1.38 | 1.17 | 1.88 | 1.81  | 0.7  | 0.21  | 1.12  | 0.72   |
| 76183 | 'Celf6'         | 91.73 | 57.97 | 30.6 | 40.6 | 64   | 31.86 | 22   | 40.06 | 75.58 | 75.54  |
| 76184 | 'Abca6'         | 0.01  | 0.25  | 2.18 | 0.38 | 0.02 | 0.01  | 0    | 0.01  | 0.04  | 0.02   |
| 76187 | 'Adhfe1'        | 2.57  | 2.97  | 4.06 | 7.91 | 7.05 | 7.9   | 0    | 3.85  | 0     | 5.14   |
| 76192 | 'Abhd12'        | 108.1 | 102.3 | 140  | 113  | 136  | 128.6 | 106  | 119.4 | 150.4 | 79.62  |
| 76199 | 'Med13l'        | 0.89  | 1.59  | 1.24 | 2.61 | 2.48 | 0.71  | 1.22 | 0.73  | 2.65  | 1.02   |
| 76205 | 'Stard3nl'      | 128.1 | 110.9 | 92.7 | 54.1 | 91.9 | 147.9 | 107  | 101.2 | 65.2  | 121.95 |
| 76206 | 'Gpr165'        | 16.83 | 17.93 | 28   | 6.03 | 1.02 | 2.48  | 16.4 | 35.49 | 57.33 | 36.83  |
| 76217 | 'Jakmip2'       | 25.03 | 26.45 | 17.8 | 6.16 | 30.8 | 23.98 | 15.2 | 27.72 | 26.56 | 24.64  |
| 76219 | 'Arxes1'        | 138.6 | 182.9 | 70.4 | 88.7 | 75.9 | 107.9 | 90.7 | 120   | 74.47 | 76.34  |
| 76223 | 'Agbl3'         | 4.99  | 6.85  | 9.96 | 9.43 | 8.57 | 18.38 | 5.57 | 1.6   | 5.34  | 5.05   |
| 76229 | 'Vmn2r29'       | 0.09  | 0.76  | 0.69 | 0    | 0.78 | 0.27  | 0.47 | 0.33  | 0.12  | 0.5    |
| 76233 | 'Dnttip1'       | 8.34  | 5.56  | 3.59 | 0    | 12.8 | 12.03 | 9.49 | 4.09  | 16.38 | 3.51   |
| 76237 | '6430628N08Rik' | 5.21  | 0     | 0    | 0    | 4.13 | 0     | 4.84 | 2.65  | 0     | 1.93   |
| 76238 | 'Grhpr'         | 60.92 | 70.1  | 59.5 | 63.5 | 34.3 | 80.85 | 72.7 | 66.58 | 52.28 | 46.61  |
| 76246 | 'Rtf1'          | 5.27  | 4.63  | 6.67 | 6.72 | 13.6 | 7.36  | 4.95 | 7.55  | 7.38  | 6.29   |
| 76251 | 'Ercc6l2'       | 1.21  | 3.61  | 3.38 | 3.71 | 1.82 | 2.49  | 4.08 | 2.29  | 2.44  | 0.03   |
| 76252 | 'Atp6v0e2'      | 319.4 | 300.9 | 403  | 273  | 302  | 525.4 | 419  | 466   | 407   | 367.18 |
| 76257 | 'Slc38a3'       | 11.9  | 4.46  | 13.9 | 6.11 | 1.06 | 6.48  | 13   | 5.39  | 0.02  | 3.84   |
| 76260 | 'Ttc8'          | 26.26 | 25.68 | 27.2 | 16.7 | 22.8 | 41.04 | 10   | 24.99 | 19.19 | 33.82  |
| 76261 | '0610040J01Rik' | 3.97  | 0     | 7.62 | 9.49 | 0    | 0     | 5.56 | 2.58  | 0     | 3.52   |
| 76263 | 'Gstk1'         | 11.15 | 1.94  | 7.49 | 30.2 | 10.2 | 36.88 | 6.95 | 9.59  | 0     | 15.86  |
| 76265 | 'Tsen54'        | 2.51  | 1.78  | 0    | 2.55 | 6.59 | 4.96  | 3.41 | 2.14  | 0     | 3.29   |
| 76267 | 'Fads1'         | 29.03 | 32.27 | 40.4 | 7.87 | 25.7 | 20.25 | 25.1 | 22.13 | 17.36 | 16.26  |
| 76273 | 'Ndfip2'        | 34.93 | 14.04 | 37.3 | 38.1 | 17.8 | 12.41 | 14.7 | 34.26 | 33.55 | 15.92  |
| 76281 | 'Tax1bp3'       | 5.22  | 8.09  | 2.1  | 16   | 8.57 | 8.59  | 14.2 | 13.28 | 3.45  | 14.89  |
| 76282 | 'Gpt'           | 0     | 2.08  | 0    | 0    | 0.5  | 0     | 0    | 0     | 2.87  | 0.02   |
| 76294 | 'Asb5'          | 0.03  | 0     | 0.07 | 0.65 | 0    | 0     | 0    | 0.03  | 0.03  | 0      |
| 76295 | 'Atp11b'        | 7.75  | 3.36  | 12.5 | 13   | 5.99 | 2.35  | 4.14 | 5.32  | 19.85 | 3.92   |
| 76299 | 'Erp44'         | 43.65 | 44.29 | 19.7 | 24.6 | 27.1 | 38.97 | 19.9 | 36.68 | 47.37 | 48.58  |
| 76302 | 'Pcnp'          | 184.1 | 173.9 | 166  | 176  | 174  | 169.3 | 107  | 159.8 | 213.1 | 194.25 |
| 76303 | 'Osbp'          | 2.25  | 1.22  | 0.83 | 2.68 | 2.17 | 2.1   | 1.96 | 1.08  | 1.82  | 0.34   |
| 76306 | 'Slc18b1'       | 12.01 | 2.31  | 6.09 | 8.33 | 6.88 | 6.22  | 3.06 | 4.14  | 13.31 | 10.45  |
| 76308 | 'Rab1b'         | 146.3 | 224.9 | 145  | 161  | 175  | 217.5 | 163  | 162.9 | 139.2 | 186.67 |
| 76332 | 'Cog2'          | 9.72  | 7.64  | 16.1 | 0.12 | 9.91 | 4.11  | 12.2 | 7.8   | 26.59 | 7.26   |
| 76338 | 'Rab2b'         | 37.02 | 20.43 | 29.9 | 4.37 | 10.9 | 18.98 | 49.6 | 34.46 | 20.34 | 34.2   |
| 76355 | 'Tgds'          | 8.32  | 2.2   | 7.16 | 7.38 | 3.47 | 4.8   | 5.95 | 1.61  | 9.4   | 5.93   |
| 76357 | 'Trmt5'         | 3.99  | 16.05 | 9.69 | 0    | 3.1  | 0.08  | 11.9 | 14    | 0     | 15.02  |
| 76366 | 'Mtif3'         | 13.3  | 9.35  | 12.5 | 23.7 | 16.2 | 7.49  | 17   | 13.23 | 6.8   | 18.13  |
| 76367 | 'Trp53rkb'      | 0.27  | 1.55  | 0.19 | 3.11 | 3.18 | 2.88  | 6.02 | 1.41  | 0.02  | 0      |
| 76373 | 'Zfp773'        | 0.1   | 0.03  | 2.52 | 2.67 | 0.05 | 0.04  | 0.13 | 0     | 2.73  | 0      |
| 76375 | 'Det1'          | 0     | 1.74  | 0    | 0    | 5.75 | 0.76  | 0    | 0.08  | 0     | 3.59   |
| 76376 | 'Slc24a2'       | 4.59  | 0.88  | 6.26 | 2.01 | 5.83 | 3.37  | 3.12 | 2.64  | 1.54  | 1.12   |
| 76380 | 'Cep112'        | 4.88  | 4.03  | 2.5  | 9.7  | 5.13 | 6.3   | 5.14 | 2.7   | 3.67  | 10.18  |
| 76405 | '1700018B08Rik' | 0     | 0     | 0    | 0    | 1.9  | 0     | 0    | 0     | 0     | 0      |
| 76406 | 'Tex45'         | 0     | 2.64  | 0    | 4.18 | 0    | 0     | 0    | 0     | 2.32  | 0      |
| 76408 | 'Abcc3'         | 0     | 0     | 0    | 0    | 0    | 0.73  | 0    | 0.49  | 0.24  | 0      |
| 76411 | 'lft43'         | 23.76 | 14.39 | 12   | 25.4 | 51.7 | 22.16 | 15.8 | 31.78 | 30.7  | 25.18  |
| 76413 | '1700016D06Rik' | 0.11  | 0.23  | 0    | 0    | 0    | 0     | 0.52 | 0.03  | 0     | 0      |
| 76415 | 'Fam187b'       | 0     | 0     | 0    | 0    | 3.77 | 0     | 0    | 0     | 0     | 0      |
| 76416 | 'Znrd1as'       | 15.6  | 10.86 | 4.6  | 9.42 | 7.31 | 7.75  | 0    | 0.17  | 0     | 16.36  |
| 76421 | '1700028K03Rik' | 0.21  | 0.19  | 1.65 | 0    | 0.26 | 0     | 1.26 | 0.01  | 0     | 0.22   |
| 76425 | 'Gid8'          | 27.07 | 37.28 | 34.6 | 25.6 | 51.7 | 39.37 | 31.8 | 48.05 | 39.42 | 23.05  |
| 76426 | 'Fam209'        | 0     | 0.16  | 0    | 3.33 | 0    | 0.31  | 0    | 0     | 0     | 1.28   |
| 76429 | 'Lhpp'          | 6.59  | 2.65  | 11.2 | 0.04 | 13.9 | 12.24 | 24   | 13.65 | 0     | 13.43  |

|       |                 |       |       |      |      |      |       |      |       |       |        |
|-------|-----------------|-------|-------|------|------|------|-------|------|-------|-------|--------|
| 76438 | 'Rftn1'         | 15.58 | 20.56 | 4.08 | 23.6 | 17   | 29.01 | 13.8 | 11.14 | 26.52 | 19.37  |
| 76441 | 'Daam2'         | 2.04  | 0.56  | 0.01 | 3.27 | 5.81 | 0     | 1.75 | 0     | 0.06  | 1.42   |
| 76448 | 'Ppp1r18'       | 0.02  | 4.45  | 0.25 | 0    | 0.04 | 0     | 0    | 1.52  | 0     | 3.28   |
| 76453 | 'Prss23'        | 3.24  | 0     | 0    | 0    | 19.3 | 0     | 0    | 3.66  | 0     | 0      |
| 76454 | 'Fbxo31'        | 8.17  | 2.43  | 6.13 | 8.43 | 7.87 | 4.54  | 15.7 | 4.53  | 4.62  | 0.33   |
| 76457 | 'Ccdc134'       | 3.22  | 0.55  | 11.6 | 8.89 | 4.05 | 0     | 2    | 3.86  | 0     | 1.95   |
| 76459 | 'Car12'         | 1.25  | 0     | 6.42 | 0    | 0    | 0.12  | 0.01 | 2.56  | 0.05  | 0      |
| 76464 | 'Knl1'          | 0     | 0     | 0.01 | 0.01 | 0    | 0.01  | 0    | 0     | 0.01  | 0      |
| 76467 | 'Msr2'          | 64.04 | 21.37 | 23.3 | 52.2 | 21.2 | 25.85 | 20.2 | 29.14 | 19.37 | 26.46  |
| 76469 | 'Cmya5'         | 0     | 0.23  | 0.02 | 0.22 | 0.01 | 0.01  | 0.02 | 0.01  | 0     | 0.02   |
| 76477 | 'Pcolce2'       | 3.49  | 24.3  | 1.81 | 4.05 | 5.38 | 0     | 16.2 | 1.53  | 1.34  | 2.91   |
| 76478 | 'Haus8'         | 24.01 | 13.47 | 29.8 | 0.04 | 23   | 46.77 | 9.61 | 21.32 | 8.16  | 27.44  |
| 76479 | 'Smndc1'        | 21.59 | 22    | 17.2 | 23.6 | 14.1 | 6.82  | 17.9 | 19.35 | 17.01 | 13.18  |
| 76482 | 'Rmc1'          | 24.39 | 18.79 | 32.2 | 26.6 | 19.2 | 63.03 | 30.7 | 33.61 | 14.81 | 40.39  |
| 76483 | 'Lmf1'          | 11.22 | 30.23 | 13.6 | 49.8 | 13.4 | 0.46  | 13.4 | 14.37 | 13.36 | 28.42  |
| 76484 | 'Kndc1'         | 1.93  | 3.36  | 2.93 | 7.59 | 3.48 | 1.23  | 3.79 | 4.95  | 3.07  | 4.02   |
| 76485 | 'Glt8d1'        | 19.22 | 24.84 | 10.5 | 20.5 | 37.8 | 20.11 | 21.6 | 8.12  | 27.29 | 20.84  |
| 76487 | 'Ppp1r3g'       | 0     | 2.12  | 0    | 0    | 0    | 0     | 0    | 2.43  | 0     | 0      |
| 76491 | 'Abhd14b'       | 9.49  | 19.2  | 19.3 | 11   | 56.7 | 37.39 | 26.2 | 8.66  | 29.48 | 22.1   |
| 76497 | 'Ppp1r11'       | 122   | 103.9 | 109  | 111  | 146  | 112.1 | 96   | 110.1 | 116.1 | 111.11 |
| 76498 | 'Paqr4'         | 23.76 | 9.2   | 36.6 | 26.4 | 18.7 | 3.31  | 18.4 | 13.3  | 18.92 | 10.63  |
| 76499 | 'Clasp2'        | 30.52 | 29.19 | 32.9 | 39.4 | 23   | 21.81 | 32.3 | 25.04 | 53.43 | 42.01  |
| 76500 | 'Ip6k2'         | 56.97 | 86.41 | 96.9 | 147  | 61.9 | 87.35 | 92.6 | 124.3 | 97.69 | 67.66  |
| 76501 | 'Commd9'        | 98.39 | 68.2  | 81.6 | 157  | 86.5 | 167.7 | 53   | 108.4 | 122.4 | 91.29  |
| 76507 | 'Aoc1'          | 0     | 1.82  | 0    | 0    | 0    | 0     | 0    | 0     | 0     | 0      |
| 76509 | 'Plet1'         | 0     | 0.03  | 0    | 0    | 0    | 0     | 0    | 1.46  | 0     | 0      |
| 76510 | 'Trappc9'       | 27.2  | 38.32 | 48.2 | 29.4 | 24.1 | 25.84 | 27.9 | 38.18 | 40.25 | 29.28  |
| 76522 | 'Lsm8'          | 42.19 | 45.26 | 27.1 | 13.1 | 27   | 46.7  | 25.6 | 28.96 | 34.96 | 38.19  |
| 76524 | 'Cln6'          | 3.19  | 0     | 0    | 0    | 0.65 | 4.4   | 0    | 2.33  | 0     | 0      |
| 76527 | 'Il34'          | 41.45 | 39.65 | 44.2 | 11.1 | 20.6 | 62.17 | 34.1 | 39.09 | 18.51 | 26.45  |
| 76539 | 'Fam204a'       | 15.74 | 12.02 | 16   | 36.6 | 27.2 | 25.74 | 16.4 | 16.29 | 23.31 | 16.23  |
| 76547 | 'Tmem101'       | 14.37 | 20.12 | 18.6 | 24.3 | 25   | 26.94 | 41.3 | 31.55 | 38.87 | 34.08  |
| 76551 | 'Ccdc6'         | 7.55  | 15.14 | 8.7  | 5.63 | 9.87 | 12.14 | 6.05 | 7.93  | 12.28 | 12.11  |
| 76559 | 'Atg2b'         | 4.13  | 4.48  | 8.91 | 7    | 4.53 | 3.53  | 5.56 | 7.62  | 6.95  | 4.48   |
| 76560 | 'Prss8'         | 0     | 2.96  | 0    | 0    | 0    | 0     | 0    | 0     | 0.05  | 0      |
| 76561 | 'Snx7'          | 10.91 | 13.04 | 7.5  | 9.83 | 12.5 | 8.29  | 17.2 | 8.92  | 11.06 | 1.35   |
| 76563 | 'Qrs11'         | 11.18 | 12.83 | 5.05 | 1.2  | 1.04 | 16.57 | 8.43 | 9.52  | 12.76 | 18.95  |
| 76566 | 'Rflnb'         | 2.4   | 1.72  | 0.16 | 0    | 3.64 | 0.86  | 1.51 | 0.87  | 3.35  | 0.44   |
| 76568 | 'Ift46'         | 30.11 | 52.27 | 37.8 | 46   | 34.3 | 47.33 | 59.6 | 33.52 | 44.7  | 64.72  |
| 76571 | 'Styx11'        | 0     | 1.04  | 0.03 | 0    | 3.83 | 0     | 1.38 | 4.19  | 0.49  | 0.62   |
| 76574 | 'Mfsd2a'        | 0     | 3.01  | 30.7 | 0    | 0.75 | 8.69  | 23.1 | 9.14  | 0     | 0      |
| 76577 | 'Faf2'          | 21.5  | 17.33 | 25.1 | 16.8 | 13.8 | 26.01 | 14.3 | 22.82 | 24.33 | 28.41  |
| 76580 | 'Mib2'          | 7.33  | 16.03 | 38.1 | 21.2 | 22.7 | 11.4  | 44.9 | 14.54 | 45.36 | 16.6   |
| 76582 | 'lpo11'         | 7     | 2.83  | 8.64 | 7.39 | 3.76 | 4.12  | 6.03 | 3.85  | 3.93  | 5.93   |
| 76589 | 'Unc5cl'        | 0     | 0     | 0    | 0    | 0    | 0     | 0    | 0     | 1.38  | 0      |
| 76594 | 'Dnajc18'       | 17.75 | 20.38 | 19.3 | 4.48 | 23.1 | 19.23 | 11.5 | 20.78 | 21.33 | 16.56  |
| 76608 | 'Hectd3'        | 10.15 | 10.56 | 17.4 | 3.98 | 3.71 | 0.08  | 16.8 | 3.92  | 13.02 | 4.22   |
| 76612 | 'Lrrc27'        | 7.36  | 12.31 | 3.63 | 4.91 | 6.2  | 8     | 6.8  | 8.12  | 10.08 | 11.1   |
| 76614 | 'Immt'          | 67.98 | 91.35 | 108  | 73   | 79.7 | 53.31 | 63.8 | 75.56 | 72.16 | 93.86  |
| 76615 | 'Got111'        | 0     | 0     | 9.06 | 0    | 3.79 | 4.88  | 20.7 | 7.18  | 8.18  | 0      |
| 76626 | 'Msi2'          | 5.35  | 5.39  | 4.67 | 10.1 | 3.58 | 1.96  | 3.13 | 0.86  | 2.22  | 1.99   |
| 76630 | 'Stambpl1'      | 30.52 | 39.54 | 36.5 | 40.8 | 14.5 | 21.65 | 18.1 | 19.55 | 24.73 | 31.18  |
| 76645 | 'Pkd1l2'        | 0     | 0     | 0    | 0.04 | 0    | 0     | 0.15 | 1.38  | 0     | 0.15   |
| 76650 | 'Srxn1'         | 21.95 | 23.76 | 19.4 | 5.95 | 20.5 | 12.04 | 6.48 | 27.99 | 17.28 | 24.34  |
| 76652 | 'Actrt3'        | 2.2   | 1.02  | 2.45 | 0    | 0    | 0     | 0    | 3.38  | 7.6   | 0      |
| 76654 | 'Upp2'          | 0     | 0.3   | 1.16 | 0.76 | 3.4  | 4.05  | 5.33 | 1.85  | 0.06  | 2.91   |
| 76658 | '1700123K08Rik' | 0     | 0     | 0.13 | 0    | 0    | 0     | 0    | 0     | 0     | 0      |
| 76668 | 'Mdh1b'         | 1.45  | 1.1   | 0    | 7.99 | 5.22 | 0     | 5.42 | 2.2   | 0     | 13.13  |

|       |                 |       |       |      |      |      |       |      |       |       |        |
|-------|-----------------|-------|-------|------|------|------|-------|------|-------|-------|--------|
| 76670 | 'Cfap70'        | 0.07  | 2.11  | 1.16 | 2.73 | 0.1  | 0     | 0    | 0.43  | 0     | 2.37   |
| 76681 | 'Trim12a'       | 0     | 0     | 0    | 0    | 0    | 0     | 6.1  | 0     | 0     | 0      |
| 76686 | 'Clip3'         | 34.95 | 35.22 | 110  | 31.6 | 48   | 24.46 | 40.8 | 62.35 | 35.68 | 32.29  |
| 76687 | 'Spes3'         | 25.56 | 27.17 | 7.81 | 16.1 | 20.6 | 8.87  | 12.4 | 17.88 | 28.73 | 49.96  |
| 76688 | 'Arfrp1'        | 34.1  | 50.67 | 43.7 | 52   | 33.3 | 41.36 | 49.6 | 50.35 | 57.89 | 53.74  |
| 76707 | 'Clasp1'        | 6.59  | 6.01  | 12.3 | 3.17 | 4.28 | 11.11 | 4.58 | 3.98  | 4.07  | 7.4    |
| 76709 | 'Arpc2'         | 122.1 | 118.6 | 101  | 125  | 107  | 99.69 | 120  | 110.9 | 174.8 | 88.48  |
| 76718 | 'Catsperg2'     | 0     | 0.85  | 0.11 | 0    | 3.44 | 0     | 0.03 | 0     | 0     | 0      |
| 76719 | 'Kansl1'        | 10.02 | 4.75  | 12.3 | 8.25 | 4.57 | 8.53  | 12   | 7.37  | 15.32 | 6.84   |
| 76722 | 'Ckmt2'         | 1.55  | 3.16  | 3.84 | 0.74 | 0.82 | 1.41  | 0.75 | 0.45  | 1.05  | 1.34   |
| 76737 | 'Creld2'        | 59.97 | 60.54 | 41.9 | 38.8 | 32.9 | 43.45 | 46.1 | 26.67 | 35.45 | 67.12  |
| 76740 | 'Efr3a'         | 22.87 | 16.39 | 27.8 | 3.28 | 14   | 9.76  | 20.1 | 16.57 | 20.6  | 24.61  |
| 76742 | 'Snx27'         | 9.73  | 10.1  | 4.43 | 7.5  | 5.18 | 3.49  | 8.45 | 5.56  | 7.04  | 5.42   |
| 76743 | 'Gje1'          | 0.06  | 0.19  | 0.39 | 0.55 | 0.46 | 0.1   | 0.39 | 0.07  | 0.4   | 0.16   |
| 76757 | 'Trdn'          | 0.02  | 0     | 0.15 | 0.05 | 0.04 | 0.06  | 0.01 | 0.01  | 0.03  | 0.03   |
| 76758 | 'Gsdma2'        | 0     | 0     | 0.12 | 0    | 0    | 0     | 0    | 0     | 0     | 0      |
| 76763 | 'Mospd2'        | 4.65  | 0.6   | 0.27 | 0.16 | 0.22 | 1.57  | 0.78 | 1.59  | 0.19  | 0      |
| 76768 | 'Alpi'          | 0     | 0.02  | 0    | 0    | 0    | 0     | 0    | 0     | 0     | 0      |
| 76770 | '2010005H15Rik' | 22.69 | 0.78  | 16.3 | 148  | 0    | 4.43  | 6.06 | 37.75 | 26.34 | 0.99   |
| 76773 | 'Wdyhv1'        | 19.5  | 24.06 | 15.2 | 42.8 | 12.5 | 38.25 | 0    | 35.69 | 21.01 | 57.57  |
| 76775 | 'Slc10a7'       | 2.08  | 0.67  | 1.5  | 5.4  | 3.86 | 0.2   | 6.75 | 4.11  | 2.69  | 3.64   |
| 76779 | 'Cluap1'        | 23.79 | 31.42 | 44.2 | 25.5 | 33.9 | 28.19 | 26.1 | 21.05 | 8.35  | 46.5   |
| 76781 | 'Mettl4'        | 6.13  | 1.67  | 1.26 | 1.56 | 0.01 | 0.44  | 4.78 | 1.65  | 4.26  | 1.53   |
| 76784 | 'Mtif2'         | 19.59 | 9.22  | 6.05 | 10.7 | 18.7 | 9.75  | 18.4 | 12.51 | 16.99 | 10.38  |
| 76787 | 'Ppfia3'        | 6.69  | 3.37  | 6.8  | 9.44 | 7.35 | 3.71  | 12.1 | 7.27  | 2.34  | 5.4    |
| 76788 | 'Klhdc10'       | 4.38  | 4.2   | 4.9  | 9.22 | 3.98 | 1.87  | 5.37 | 5.47  | 5.76  | 4.39   |
| 76789 | 'Mzt1'          | 41.19 | 38.67 | 49.2 | 34.5 | 28.1 | 40.65 | 41.4 | 42.34 | 24.36 | 39.75  |
| 76792 | '2410131K14Rik' | 21.22 | 22.36 | 25.8 | 15.4 | 17.8 | 27.56 | 18.4 | 28.13 | 26.29 | 27.99  |
| 76793 | 'Snip1'         | 12.99 | 8.84  | 6.75 | 24.5 | 6.5  | 7.4   | 8.46 | 6.1   | 19.69 | 2.42   |
| 76795 | 'Tbc1d9b'       | 11.47 | 18.51 | 20.7 | 7.07 | 23.1 | 6.73  | 15.5 | 11.37 | 8.26  | 11.22  |
| 76797 | '2410137M14Rik' | 0     | 0     | 0    | 0    | 0    | 0     | 1.58 | 1.51  | 0     | 0      |
| 76799 | 'Tmem234'       | 62.59 | 60.12 | 50.3 | 39.6 | 95.9 | 81.6  | 89.8 | 73.45 | 70.75 | 43.46  |
| 76800 | 'Usp42'         | 2.99  | 1.25  | 4.75 | 7.73 | 3.71 | 1.59  | 0.24 | 1.86  | 1.67  | 4.33   |
| 76803 | '2410141K09Rik' | 0.1   | 0.03  | 0    | 0    | 0    | 0     | 0    | 0     | 0     | 0      |
| 76804 | 'Kdm4c'         | 3.31  | 5.51  | 0.79 | 10.3 | 4.29 | 0.69  | 1.91 | 1.89  | 5.91  | 12.77  |
| 76808 | 'Rpl18a'        | 238.7 | 276.7 | 291  | 423  | 224  | 310.4 | 278  | 227.7 | 290.5 | 233.64 |
| 76809 | 'Bri3bp'        | 5.57  | 4.15  | 6.76 | 3.43 | 3.34 | 2.98  | 12   | 4.84  | 5.03  | 4.1    |
| 76813 | 'Armc6'         | 30.12 | 43.57 | 30.6 | 2.6  | 26.2 | 24.45 | 17.5 | 43.53 | 37.67 | 13.56  |
| 76815 | 'Calcoco2'      | 0     | 0     | 0.02 | 0    | 0    | 0     | 0    | 0     | 0.23  | 0.02   |
| 76816 | 'Sdccag8'       | 11.27 | 17.96 | 1.98 | 11.5 | 18.7 | 5.45  | 7.68 | 10.07 | 6.8   | 11.18  |
| 76820 | 'Fam49a'        | 17.62 | 9.06  | 10.1 | 11.4 | 23.4 | 17.22 | 26.2 | 18.52 | 7.96  | 14.77  |
| 76824 | 'Mtfr1l'        | 97.96 | 82.15 | 66.5 | 114  | 57.8 | 117.1 | 82.5 | 34.8  | 93.2  | 45.95  |
| 76826 | 'Nubpl'         | 0.3   | 2.27  | 6.16 | 0    | 12.3 | 13.18 | 3.27 | 7.38  | 0     | 11.81  |
| 76829 | 'Dok5'          | 0.65  | 4.17  | 6.87 | 7.95 | 12.4 | 20.31 | 9.08 | 3.36  | 3.6   | 10.9   |
| 76832 | 'Hyls1'         | 3.33  | 8.49  | 6.47 | 0    | 0    | 0.81  | 0    | 2.86  | 8.94  | 5.08   |
| 76843 | 'Dtl'           | 0     | 0     | 0.01 | 0.09 | 0    | 0.03  | 0    | 0.91  | 0     | 0      |
| 76846 | 'Rps9'          | 421.4 | 439.6 | 335  | 536  | 361  | 387.9 | 280  | 327.8 | 249.1 | 356.03 |
| 76850 | 'Ago4'          | 1.29  | 1.31  | 0    | 5.5  | 0.75 | 2.58  | 2.14 | 0.06  | 0     | 1.49   |
| 76854 | 'Gper1'         | 0     | 0     | 0    | 0    | 0    | 0.02  | 0    | 0     | 0     | 3.89   |
| 76856 | 'Catsper3'      | 0     | 0     | 0    | 0    | 0    | 0     | 0    | 0     | 2.83  | 0      |
| 76857 | 'Spopl'         | 0.28  | 0.19  | 0.1  | 0.27 | 0.64 | 1.95  | 0    | 3.02  | 5.06  | 0.27   |
| 76863 | 'Dcun1d5'       | 24.91 | 17.01 | 7.84 | 26.9 | 14.3 | 22.47 | 3.4  | 19.8  | 22.57 | 9.31   |
| 76866 | 'Morn1'         | 7.45  | 10.33 | 12.3 | 12.4 | 15   | 21.15 | 11.5 | 5.32  | 7.57  | 16.14  |
| 76867 | 'Rhbdd1'        | 1.73  | 1.53  | 1.05 | 0    | 0.24 | 3.57  | 4    | 1.08  | 0.35  | 3.57   |
| 76872 | 'Ccadc116'      | 7.53  | 0.63  | 1.9  | 7.71 | 3.97 | 0.06  | 0.31 | 3.37  | 3.3   | 5.55   |
| 76877 | 'Rab36'         | 31.38 | 43.46 | 32   | 17.8 | 38.6 | 39.86 | 23.6 | 37.47 | 29.16 | 51.01  |
| 76884 | 'Cyfip2'        | 40.61 | 31.76 | 78.7 | 32.9 | 20.3 | 16.4  | 62.7 | 31.82 | 37.32 | 34.01  |
| 76886 | 'Fam81a'        | 21.19 | 23.31 | 5.39 | 20.1 | 47.7 | 25.81 | 22.4 | 17.05 | 7.27  | 17.8   |

|       |                 |       |       |      |      |      |       |      |       |       |        |
|-------|-----------------|-------|-------|------|------|------|-------|------|-------|-------|--------|
| 76889 | 'Coq8b'         | 15.72 | 27.8  | 15.1 | 14.3 | 28.7 | 14.79 | 31.9 | 25.56 | 51.56 | 35.65  |
| 76890 | 'Memo1'         | 8.8   | 5.25  | 10.3 | 9.56 | 6.52 | 7.73  | 18.1 | 6.34  | 10.12 | 8.17   |
| 76892 | 'Rnft1'         | 1.78  | 1.34  | 1.63 | 2.06 | 1.66 | 1.18  | 0    | 1.62  | 3.17  | 2.16   |
| 76893 | 'Cers2'         | 35.21 | 38.44 | 28   | 2.52 | 38.9 | 16.57 | 17.7 | 32.66 | 26.17 | 23.06  |
| 76894 | 'Mettl15'       | 8.11  | 12.79 | 3    | 0    | 9.41 | 6.17  | 3.55 | 2.96  | 0     | 6.96   |
| 76895 | 'Bicd2'         | 4.49  | 0.85  | 2.62 | 4.68 | 2.6  | 1.38  | 1.2  | 2.76  | 1.49  | 0.02   |
| 76897 | 'Raly1'         | 99.42 | 80.23 | 72.3 | 121  | 162  | 209   | 79.2 | 99.28 | 194.2 | 101.24 |
| 76898 | 'B3gat1'        | 1.01  | 0.73  | 2.51 | 1.03 | 1.95 | 1.33  | 1.3  | 1.38  | 2.04  | 0.53   |
| 76899 | 'Golga1'        | 3.54  | 2.57  | 3.98 | 0.21 | 8.27 | 5.14  | 9.96 | 5.79  | 1.18  | 9.31   |
| 76900 | 'Ssbp4'         | 69.16 | 63.31 | 92.2 | 72.1 | 68.4 | 52.27 | 68.5 | 54.85 | 106.6 | 36.92  |
| 76901 | 'Jade2'         | 1.43  | 1.31  | 3.97 | 1.86 | 2.25 | 1.41  | 5.89 | 0.57  | 3.56  | 2.9    |
| 76905 | 'Lrg1'          | 1.59  | 0     | 0    | 0    | 0    | 0.1   | 0    | 0.03  | 0.03  | 0      |
| 76915 | 'Mnd1'          | 2.6   | 0     | 2.82 | 0    | 3.59 | 0     | 4.37 | 1.93  | 0     | 3.9    |
| 76916 | 'Timmdc1'       | 31.36 | 26.1  | 29.7 | 33.3 | 18.6 | 22.1  | 4.68 | 16.14 | 19.72 | 37.29  |
| 76917 | 'Flywch2'       | 82.62 | 58.66 | 71.1 | 139  | 84.8 | 163.3 | 101  | 79.41 | 149.4 | 135.86 |
| 76925 | 'Spata46'       | 1.79  | 2.01  | 0    | 0    | 2.35 | 0     | 0    | 0     | 0     | 0      |
| 76927 | 'Tsacc'         | 5.27  | 1.32  | 3.68 | 6.34 | 3.54 | 0.17  | 7.98 | 2.85  | 0.31  | 0.5    |
| 76932 | 'Arfp2'         | 37.07 | 29.43 | 52   | 23.9 | 36.8 | 27.03 | 51.1 | 35    | 34.33 | 25.27  |
| 76933 | 'lfi27l2a'      | 6.91  | 9.71  | 0.08 | 36.9 | 8.2  | 0     | 0    | 0     | 12.16 | 10.26  |
| 76936 | 'Hnrnpm'        | 41.18 | 53.36 | 43.7 | 39.6 | 46.5 | 47.98 | 76.6 | 52.39 | 56.13 | 46.71  |
| 76938 | 'Rbm17'         | 25.22 | 24.08 | 45.1 | 39.3 | 17   | 6.21  | 49.9 | 24.34 | 41.02 | 7.43   |
| 76947 | 'Ndufaf6'       | 21.42 | 39.05 | 31.3 | 51.6 | 34.1 | 19.02 | 15.3 | 28.79 | 23.37 | 6.29   |
| 76952 | 'Nt5c2'         | 21.83 | 26.38 | 23.8 | 27.3 | 14.2 | 25.76 | 12.8 | 18.37 | 27.76 | 22.03  |
| 76954 | 'St5'           | 2.22  | 3.39  | 9.3  | 19.3 | 0.76 | 5.1   | 2.22 | 0.95  | 6.57  | 2.01   |
| 76959 | 'Chmp5'         | 117.8 | 131.9 | 103  | 51.2 | 104  | 121   | 71.4 | 93.43 | 159.6 | 115.02 |
| 76960 | 'Bcas1'         | 3.83  | 2.58  | 8.89 | 0    | 200  | 16.83 | 17.5 | 0     | 5.29  | 2.22   |
| 76964 | '2610028H24Rik' | 0     | 0     | 0    | 0    | 0    | 0     | 0    | 0     | 0.42  | 0      |
| 76965 | 'Slitrk1'       | 21.35 | 6.7   | 12.7 | 6.91 | 19.2 | 7.37  | 14.6 | 20.86 | 5.51  | 3.65   |
| 76967 | '2700049A03Rik' | 2.86  | 1.81  | 1.99 | 6.15 | 3.02 | 3.59  | 0    | 1.64  | 0.33  | 1.93   |
| 76969 | 'Chst1'         | 51.41 | 46.5  | 43.1 | 37.6 | 58.6 | 62.52 | 29.3 | 32.37 | 41.4  | 29.47  |
| 76974 | 'Urah'          | 0     | 0.7   | 0.08 | 0    | 0    | 0     | 0    | 0     | 0     | 0      |
| 76976 | 'Arxes2'        | 362.3 | 505.4 | 240  | 268  | 263  | 444.8 | 312  | 450.2 | 258.5 | 378.34 |
| 76980 | 'Ube2q11'       | 6.6   | 18.61 | 9.6  | 14.7 | 19   | 13.69 | 19.8 | 17.35 | 9.52  | 9.62   |
| 76982 | 'Vxn'           | 0.04  | 6.65  | 10.8 | 0.12 | 0.9  | 0.01  | 8.48 | 15.31 | 4.74  | 7.74   |
| 76983 | 'Scfd1'         | 56.73 | 53.66 | 46.4 | 82.5 | 51.5 | 64.09 | 47.6 | 70.12 | 48.37 | 75.88  |
| 76987 | 'Hdhd2'         | 95.96 | 75.66 | 144  | 69.9 | 78   | 99.28 | 47.9 | 98.76 | 84.97 | 81.3   |
| 77006 | 'Ddrgk1'        | 83.43 | 88.88 | 91.2 | 122  | 105  | 133.8 | 94.7 | 102.7 | 119.4 | 121.59 |
| 77015 | 'Mpped2'        | 10.93 | 9.67  | 9.63 | 7.39 | 16.1 | 19.94 | 7.09 | 1.65  | 5.07  | 5.75   |
| 77018 | 'Col25a1'       | 5.91  | 6.31  | 7.53 | 0.96 | 3.48 | 4.4   | 6.98 | 6.17  | 5.07  | 3.36   |
| 77031 | 'Slc9a8'        | 13.65 | 8.65  | 21.2 | 3.46 | 5.16 | 2.97  | 20.9 | 17.43 | 5.65  | 21.14  |
| 77032 | 'Tstd3'         | 28.84 | 37.05 | 14.3 | 0.04 | 16.5 | 6.6   | 9.02 | 15.58 | 25.18 | 13.46  |
| 77034 | '2510039O18Rik' | 3.22  | 0.51  | 0.33 | 4.02 | 0.02 | 0.61  | 0    | 3.17  | 5.11  | 0.53   |
| 77035 | 'Kdm8'          | 0.48  | 2.67  | 2.72 | 0    | 0.4  | 0     | 4.04 | 0     | 3.37  | 3.14   |
| 77036 | '1700109H08Rik' | 0     | 0     | 0    | 0    | 0    | 0     | 0    | 0.06  | 0     | 0.19   |
| 77037 | 'Mrap'          | 0     | 2.06  | 0    | 0    | 0    | 0     | 0    | 0     | 0     | 0      |
| 77038 | 'Arfgap2'       | 32.89 | 38.34 | 35.2 | 24.4 | 18.4 | 39.04 | 32.2 | 32.08 | 53.49 | 21.17  |
| 77040 | 'Atg16l1'       | 30.07 | 27.02 | 27.3 | 33.9 | 27.6 | 19.05 | 17.8 | 30.77 | 26.55 | 32.13  |
| 77041 | 'Arsk'          | 3.01  | 0.39  | 0.21 | 0.34 | 2.16 | 1.62  | 0.7  | 0.14  | 0.95  | 2.23   |
| 77044 | 'Arid2'         | 2.63  | 1.96  | 0.95 | 3.95 | 0.53 | 0.56  | 3.02 | 0.86  | 1.45  | 1.92   |
| 77045 | 'Bcl7a'         | 2.15  | 3.46  | 5.63 | 2.59 | 10   | 5.92  | 3.07 | 7.46  | 6.09  | 7.6    |
| 77048 | 'Cep83'         | 0.62  | 1.7   | 0    | 4.66 | 0.25 | 0.18  | 0    | 1.38  | 0.53  | 0.9    |
| 77053 | 'Sun1'          | 20.62 | 29.54 | 30.4 | 17.8 | 16.2 | 1.54  | 17.8 | 17.86 | 20.69 | 26.65  |
| 77056 | 'Tmco4'         | 0     | 0     | 0    | 0    | 0.13 | 0     | 0    | 0.4   | 1.35  | 0      |
| 77058 | 'Ccgc183'       | 0.1   | 0.17  | 0.03 | 0    | 0.09 | 0.11  | 0    | 0.12  | 0     | 0      |
| 77065 | 'Ints7'         | 8.37  | 6.51  | 4    | 4.66 | 3.55 | 5.9   | 1.33 | 5.37  | 4.22  | 9.6    |
| 77087 | 'Ankrd11'       | 4.23  | 5.75  | 5.05 | 10.9 | 9.56 | 5.69  | 6.62 | 6.26  | 3.68  | 7.13   |
| 77090 | 'Ocel1'         | 0     | 0     | 0.46 | 2.61 | 0    | 0.37  | 0    | 1.15  | 0     | 2.47   |
| 77097 | 'Tanc2'         | 7.16  | 5.77  | 5.8  | 11.7 | 11   | 6.69  | 9.95 | 4.07  | 5.1   | 9.04   |



|       |                 |       |       |      |      |      |       |      |       |       |       |
|-------|-----------------|-------|-------|------|------|------|-------|------|-------|-------|-------|
| 77705 | '9230104L09Rik' | 0.79  | 0     | 0    | 0    | 0    | 0     | 0    | 0     | 0     | 0     |
| 77721 | 'Mrps5'         | 29.16 | 53    | 43.8 | 46.7 | 46.5 | 26.58 | 61   | 42.05 | 30.68 | 52.95 |
| 77733 | 'Rnf170'        | 8.41  | 9.75  | 10.3 | 11.9 | 8.21 | 9.91  | 24   | 7.42  | 9.96  | 9.85  |
| 77739 | 'Adamtsl1'      | 0     | 0.19  | 0.88 | 0    | 0    | 0.38  | 0.23 | 0     | 0     | 0     |
| 77744 | 'Bora'          | 6.17  | 8.02  | 12   | 18.3 | 12.8 | 11.3  | 11.1 | 5.51  | 10.76 | 8.05  |
| 77766 | 'Elp4'          | 3.35  | 1.48  | 4.62 | 3.43 | 0.11 | 2     | 3.28 | 2.7   | 3.39  | 4.43  |
| 77767 | 'Ernm'          | 4.87  | 9.34  | 0.5  | 0    | 12.6 | 13.55 | 0    | 1.04  | 0.01  | 0.01  |
| 77771 | 'Csrnp3'        | 11.55 | 13.41 | 7.58 | 7.76 | 5.31 | 5.63  | 13.1 | 9.08  | 6.91  | 5.99  |
| 77772 | 'Dcst1'         | 0     | 0     | 0.05 | 0    | 0.15 | 0     | 0.32 | 0.05  | 0     | 0     |
| 77777 | 'Ulbp1'         | 0     | 0     | 0    | 0    | 0    | 0.03  | 0    | 0     | 0     | 0     |
| 77781 | 'Epm2aip1'      | 12.69 | 19.81 | 15   | 28.1 | 9.94 | 10.2  | 14.4 | 7.37  | 8.52  | 13.21 |
| 77782 | 'Polq'          | 0     | 0     | 0    | 0    | 0.01 | 0.04  | 0.05 | 0.12  | 0.17  | 0.01  |
| 77794 | 'Adamtsl2'      | 1.53  | 4.47  | 0    | 7.71 | 0    | 0.01  | 0    | 0.01  | 0     | 2.86  |
| 77798 | 'A930009A15Rik' | 0     | 2.35  | 9.12 | 0    | 0    | 4.77  | 1.83 | 0     | 0     | 0     |
| 77799 | 'Sla2'          | 0     | 0     | 0    | 0    | 0    | 1.35  | 0    | 0     | 0     | 0     |
| 77803 | 'Shisal2b'      | 0     | 2.73  | 0    | 0    | 4.4  | 3.71  | 0    | 1.06  | 11.48 | 11.96 |
| 77805 | 'Esco1'         | 4.42  | 7.59  | 7.81 | 5.39 | 9.34 | 7.53  | 2.14 | 3.5   | 5.78  | 3.73  |
| 77809 | 'Lrrc42'        | 10    | 24.99 | 15   | 9.08 | 21.8 | 2.09  | 0.52 | 11.26 | 8.75  | 5.55  |
| 77827 | 'Krba1'         | 9.07  | 11.97 | 13.9 | 4.71 | 10.3 | 5.54  | 13   | 7.63  | 16.09 | 9.77  |
| 77832 | 'Tchp'          | 5.64  | 11.13 | 8.86 | 0.07 | 3.38 | 2.36  | 0.05 | 4.89  | 0.05  | 3.84  |
| 77836 | 'Mlana'         | 0     | 0.12  | 0    | 0    | 0    | 0     | 0    | 0.48  | 0     | 0     |
| 77853 | 'Msl2'          | 0.46  | 1.55  | 0.7  | 7.52 | 0.91 | 0.27  | 3.23 | 0.65  | 0.4   | 1.03  |
| 77862 | 'Thyn1'         | 100.1 | 83.41 | 137  | 85.8 | 94.2 | 90.03 | 95.8 | 119   | 67.76 | 54.7  |
| 77864 | 'Ypel2'         | 6.18  | 7.88  | 3.7  | 9.06 | 8.31 | 9.22  | 3.33 | 4.17  | 1.14  | 1.2   |
| 77877 | '6030458C11Rik' | 9.05  | 6.21  | 8.67 | 9.45 | 6.35 | 3.65  | 13.2 | 11.69 | 6.99  | 4.81  |
| 77883 | '6030498E09Rik' | 0     | 0     | 0    | 0    | 0    | 1.43  | 0    | 0     | 0     | 0     |
| 77889 | 'Lbh'           | 6.3   | 4.53  | 4.56 | 0    | 8.54 | 4.26  | 9.87 | 12.21 | 7.16  | 7.07  |
| 77891 | 'Ube2s'         | 26.27 | 33.11 | 23.7 | 15.4 | 20.8 | 29.05 | 24.2 | 47.9  | 69.47 | 32.77 |
| 77914 | 'Krtap17-1'     | 0     | 19.98 | 3.54 | 31.7 | 0    | 0     | 3.54 | 4.3   | 0     | 2.56  |
| 77929 | 'Yipf6'         | 4.89  | 1.44  | 5.8  | 8.16 | 3.48 | 4.62  | 1.59 | 3.27  | 2.17  | 8.21  |
| 77938 | 'Fam53b'        | 2.65  | 3.24  | 0.14 | 0.01 | 0.91 | 0.33  | 1.33 | 2.4   | 1.52  | 0.99  |
| 77945 | 'Rpgr1p1'       | 7.01  | 5.73  | 2.62 | 6.24 | 14.6 | 0.82  | 11   | 9.54  | 13.43 | 5.92  |
| 77951 | 'Cyp20a1'       | 9.56  | 12.25 | 17.4 | 16.2 | 10.9 | 13.36 | 10.4 | 0.8   | 5.87  | 14.72 |
| 77963 | 'Hook1'         | 18.2  | 15.75 | 12.7 | 8.29 | 16.4 | 21.67 | 18.4 | 21.93 | 26.97 | 11.44 |
| 77974 | 'Rdh12'         | 1.38  | 0     | 3.52 | 0    | 2.25 | 10.07 | 0    | 3.42  | 10.19 | 4.76  |
| 77975 | 'Tmem50b'       | 139.6 | 91.97 | 81.4 | 78.6 | 66.2 | 89.68 | 81.9 | 102.7 | 67.57 | 52.7  |
| 77976 | 'Nuak1'         | 0.11  | 0     | 2.58 | 0.75 | 3.37 | 0.24  | 2.01 | 0.02  | 1.14  | 1.58  |
| 77980 | 'Sbf1'          | 10.42 | 9.57  | 13.9 | 1.42 | 12.5 | 5.45  | 18.1 | 10.14 | 10.22 | 4.09  |
| 77987 | 'Ascc3'         | 2.08  | 2.51  | 1.93 | 2.6  | 1.24 | 2.38  | 2.64 | 0.68  | 4.32  | 1.58  |
| 77996 | 'Cutal'         | 0     | 0     | 0    | 0    | 0    | 0     | 0    | 0     | 0.13  | 0     |
| 77998 | 'Grifin'        | 0     | 0     | 0    | 0    | 0    | 0     | 8.38 | 0     | 0     | 0     |
| 78004 | 'Prr15'         | 0.06  | 0.11  | 0    | 0.84 | 0.4  | 0     | 1.14 | 0.06  | 1.3   | 0.19  |
| 78016 | 'Ccdc150'       | 0     | 0     | 0    | 0    | 0    | 0     | 0.04 | 0     | 0.41  | 0     |
| 78038 | 'Mccc2'         | 28.56 | 21.75 | 22.2 | 26.8 | 22.7 | 33.27 | 21.5 | 26.8  | 19.61 | 22.92 |
| 78070 | 'Cpt1c'         | 78.15 | 98.67 | 30.6 | 48.3 | 62.5 | 49.72 | 43.7 | 84.32 | 89.32 | 81.76 |
| 78088 | 'Sowahb'        | 0     | 0     | 0    | 6.04 | 0    | 0     | 0    | 0.98  | 0     | 0     |
| 78100 | 'Msantd4'       | 27    | 21.31 | 30.7 | 28.1 | 30.4 | 30.82 | 25.9 | 30.52 | 22.89 | 15.84 |
| 78134 | 'Lpar4'         | 0.03  | 0     | 0    | 0    | 0    | 0     | 0    | 0.07  | 0     | 0     |
| 78174 | 'Cox7b2'        | 2.25  | 1.65  | 1.66 | 0    | 0    | 1.69  | 0    | 0     | 2.11  | 0     |
| 78177 | 'Ninl'          | 1.24  | 0.04  | 0    | 3.29 | 2.35 | 0.01  | 0    | 0     | 0.09  | 1.22  |
| 78232 | 'Trappc6b'      | 78.3  | 45.24 | 87.3 | 112  | 54.6 | 55.75 | 21.6 | 49.93 | 60.36 | 48.02 |
| 78244 | 'Dnajc21'       | 4.75  | 7.99  | 2.63 | 16.2 | 2.9  | 4.87  | 2.39 | 2.21  | 0.17  | 0.17  |
| 78245 | 'Acbd7'         | 14.58 | 4.05  | 13.4 | 14.2 | 65.7 | 0     | 4.53 | 4.07  | 0     | 3.46  |
| 78246 | 'Phf23'         | 20.13 | 35.23 | 14.9 | 24.2 | 27.4 | 10.42 | 25.7 | 28.55 | 19.99 | 20.17 |
| 78248 | 'Armxc1'        | 47.87 | 51.86 | 59.5 | 64.1 | 50.9 | 57.65 | 73.9 | 61.21 | 51.1  | 68.2  |
| 78249 | 'Adgrf4'        | 2.48  | 0     | 0    | 0    | 0    | 0     | 0    | 0     | 0     | 2.42  |
| 78250 | 'lqch'          | 0.51  | 0.4   | 0.61 | 0.44 | 0.58 | 0.45  | 0.46 | 0.39  | 0.67  | 0.31  |
| 78251 | 'Zfp712'        | 0.32  | 3.61  | 1.44 | 2.75 | 4.17 | 3.47  | 1.55 | 0.37  | 0.4   | 0.67  |



|       |                 |       |       |      |      |      |       |      |       |       |        |
|-------|-----------------|-------|-------|------|------|------|-------|------|-------|-------|--------|
| 78252 | 'Nxpe2'         | 0     | 0     | 0.66 | 0    | 0    | 0     | 0    | 0     | 0     | 0      |
| 78255 | 'Ralgps2'       | 4.28  | 11.89 | 2.47 | 6.57 | 6.39 | 4.8   | 3.28 | 5.68  | 2.98  | 4.91   |
| 78257 | 'Lrrc9'         | 1.84  | 0.68  | 2.09 | 2.27 | 2.18 | 1.37  | 0    | 0.25  | 3.52  | 2.16   |
| 78266 | 'Zfp687'        | 1.61  | 4.96  | 6.01 | 7.83 | 3.3  | 0.36  | 1.71 | 1.93  | 11.11 | 4.56   |
| 78267 | 'Klhdc8b'       | 98.16 | 125.5 | 54.4 | 92.1 | 168  | 66.5  | 42.9 | 37.21 | 37.48 | 73.41  |
| 78283 | 'Map7d2'        | 28.96 | 29.87 | 32.3 | 34.5 | 35.2 | 29.05 | 25.9 | 36.62 | 23.95 | 23.37  |
| 78284 | 'Creb3l4'       | 0     | 0.04  | 0    | 7.31 | 0    | 0     | 0    | 0     | 0     | 0      |
| 78286 | 'Nav2'          | 2.24  | 4.83  | 2.41 | 6.02 | 1.09 | 1.84  | 3.32 | 2.82  | 5.12  | 2.77   |
| 78287 | 'Rbsn'          | 7.35  | 8.58  | 8.27 | 22.9 | 10.1 | 1.28  | 3.01 | 11.28 | 9.39  | 8.58   |
| 78294 | 'Rps27a'        | 271.2 | 315   | 342  | 366  | 310  | 344.8 | 327  | 233   | 188.3 | 283.56 |
| 78303 | 'Hist3h2ba'     | 147.9 | 130.4 | 135  | 75.5 | 162  | 127.4 | 120  | 156.4 | 117.8 | 95.83  |
| 78304 | 'Naa38'         | 122.4 | 158.5 | 151  | 157  | 110  | 184.7 | 164  | 76.06 | 124.2 | 118.7  |
| 78308 | 'Gpr108'        | 49.14 | 18.37 | 22.9 | 34.1 | 32.2 | 37.91 | 27.4 | 36.32 | 37.85 | 28.06  |
| 78309 | 'Cul9'          | 4.27  | 1.82  | 3.75 | 1.88 | 0.44 | 0.9   | 2.03 | 0.98  | 1.7   | 3.57   |
| 78317 | 'Ccdc88b'       | 0.62  | 0     | 0.06 | 0    | 0    | 0     | 0    | 0     | 0     | 0.61   |
| 78321 | 'Ankrd23'       | 1.49  | 14.18 | 6.69 | 4.36 | 2.41 | 11.08 | 6.69 | 6.89  | 11.24 | 8.82   |
| 78323 | 'Fam219b'       | 9.22  | 11.5  | 12.8 | 23.8 | 30.6 | 13.6  | 7.06 | 9.2   | 17.91 | 9.31   |
| 78330 | 'Ndufv3'        | 384.7 | 303.3 | 429  | 510  | 328  | 570.7 | 316  | 228.5 | 400.1 | 382.97 |
| 78334 | 'Cdk19'         | 2.58  | 0.3   | 3.5  | 0    | 0.11 | 0.05  | 0    | 1.44  | 0.13  | 0      |
| 78339 | 'Ttyh3'         | 0.74  | 0.54  | 2.8  | 0.84 | 1.68 | 0.88  | 3    | 1.13  | 2.31  | 2.51   |
| 78369 | 'Icam4'         | 0     | 0     | 0    | 0    | 3.56 | 0     | 0    | 1.16  | 2.33  | 0.49   |
| 78372 | 'Snrrp25'       | 28.15 | 29.36 | 57.3 | 48   | 106  | 95.79 | 60.8 | 57.41 | 23.19 | 53.11  |
| 78373 | 'Nudt17'        | 33.82 | 37.68 | 26   | 29.7 | 23.5 | 23.97 | 33.2 | 23.63 | 52.55 | 26.9   |
| 78376 | 'Sapcd1'        | 0     | 0     | 1.43 | 0    | 0    | 1.1   | 0    | 0     | 0     | 0      |
| 78388 | 'Mvp'           | 0     | 0.15  | 0    | 0    | 0.91 | 4.17  | 0    | 0     | 3.99  | 0      |
| 78390 | 'Pla2g4d'       | 0     | 0     | 0    | 0    | 0    | 0     | 0    | 0     | 0.57  | 0      |
| 78394 | 'Ddx52'         | 5.55  | 14.6  | 11   | 7.47 | 7.5  | 12.74 | 4.94 | 7.56  | 7.88  | 6.14   |
| 78405 | 'Ntf5'          | 0.95  | 0     | 0    | 0    | 0    | 0     | 0    | 0     | 0     | 0      |
| 78408 | 'Fam131a'       | 69.99 | 72.6  | 43.9 | 28.8 | 56.6 | 52.86 | 38.2 | 62.6  | 34.33 | 47.66  |
| 78412 | 'Cyren'         | 3.12  | 3.19  | 0.02 | 0.05 | 1.79 | 17.43 | 0.6  | 0.54  | 1.85  | 4.04   |
| 78416 | 'Rnase6'        | 11.69 | 6.64  | 0.02 | 0    | 4.99 | 0     | 4.33 | 4.75  | 7.25  | 0      |
| 78428 | 'Pym1'          | 8.32  | 9.58  | 16.2 | 14.2 | 8.2  | 7.72  | 4.12 | 19.27 | 16.06 | 16.85  |
| 78444 | 'Pgpep1l'       | 0     | 0.89  | 1.95 | 0    | 0.8  | 0.2   | 0    | 2.11  | 0.36  | 0.33   |
| 78455 | 'Helz'          | 8.52  | 3.94  | 9.18 | 4.41 | 8.57 | 3.22  | 9.82 | 5.63  | 17.85 | 5.8    |
| 78465 | 'Ccdc190'       | 0.48  | 0.71  | 1.86 | 0    | 5.06 | 0     | 5.11 | 0     | 0     | 3.16   |
| 78473 | 'Skap1'         | 2.67  | 4.28  | 2.13 | 0    | 0.03 | 3.65  | 3.71 | 11    | 0.04  | 9.38   |
| 78506 | 'Micu3'         | 65.78 | 72.69 | 49.6 | 110  | 63.2 | 55.23 | 64.4 | 58.44 | 59.12 | 61.85  |
| 78514 | 'Arhgap10'      | 0.62  | 0     | 0    | 0    | 0    | 0     | 0    | 0.02  | 2.6   | 0      |
| 78521 | 'B230219D22Rik' | 6.98  | 4.73  | 4.82 | 7.37 | 4    | 1.31  | 1.26 | 5.58  | 8.56  | 5.87   |
| 78523 | 'Mrpl9'         | 36.29 | 56    | 57.1 | 29.4 | 27.9 | 23.02 | 57.6 | 44.95 | 14.12 | 54.34  |
| 78541 | 'Asb8'          | 41.67 | 43.67 | 49   | 40.2 | 26.9 | 56.1  | 47.7 | 36.71 | 40.65 | 54.49  |
| 78558 | 'Htra3'         | 0     | 0     | 1.25 | 0.03 | 0    | 1.29  | 0    | 1.71  | 0     | 0      |
| 78560 | 'Adgra2'        | 0     | 0.05  | 0.97 | 0    | 0.11 | 0     | 0.22 | 0     | 0     | 0.04   |
| 78581 | 'Utp23'         | 6.1   | 7.97  | 8.38 | 11.7 | 10.9 | 2.45  | 2.95 | 8.05  | 8.76  | 6.72   |
| 78586 | 'Srbd1'         | 2.61  | 2.83  | 1.91 | 0    | 3.88 | 1.63  | 1.62 | 0.86  | 4.07  | 1.48   |
| 78593 | 'Nrip3'         | 20.22 | 22.26 | 39.6 | 24.8 | 47.7 | 41.44 | 58.8 | 24.38 | 72.03 | 57.66  |
| 78600 | 'Pde6h'         | 0     | 2.35  | 0.85 | 0    | 0    | 0     | 0    | 0     | 0     | 0      |
| 78610 | 'Uvrag'         | 5.21  | 0.83  | 0.08 | 11.1 | 3.78 | 3.16  | 13.6 | 5.26  | 3.52  | 0.05   |
| 78617 | 'Cstad'         | 4.68  | 8.78  | 4.15 | 0    | 4.12 | 0     | 0    | 9.48  | 0     | 7.28   |
| 78618 | 'Acap2'         | 0.89  | 1.72  | 2.44 | 1.56 | 1.77 | 5.39  | 2.55 | 1.62  | 1.86  | 1.65   |
| 78619 | 'Zfp449'        | 2.17  | 1.99  | 0    | 0.71 | 1.14 | 0.01  | 0.09 | 4.08  | 1.39  | 5.35   |
| 78625 | '1700061G19Rik' | 0.15  | 0     | 0.74 | 0    | 0    | 0     | 0.66 | 0     | 0.51  | 0      |
| 78651 | 'Lsm6'          | 34.19 | 32.98 | 28.3 | 31.2 | 33.4 | 44.03 | 40   | 33.02 | 46.62 | 36.32  |
| 78653 | 'Bola3'         | 99.04 | 76.58 | 66.5 | 112  | 83.9 | 82.19 | 65.1 | 79.37 | 79.73 | 103.64 |
| 78654 | '1700066C05Rik' | 0.78  | 0.14  | 2.5  | 3.29 | 1.84 | 0     | 0    | 0.23  | 0     | 0.38   |
| 78655 | 'Eif3j1'        | 5.8   | 6.84  | 2.35 | 4.55 | 0.89 | 16.05 | 1.18 | 0.5   | 2.85  | 3.3    |
| 78656 | 'Brd8'          | 42.91 | 35.85 | 38.9 | 59.5 | 56.2 | 36.13 | 32.1 | 30.86 | 46.97 | 35.72  |
| 78658 | 'Ncapd3'        | 1.55  | 3.71  | 2.3  | 3.67 | 5.48 | 5.54  | 7    | 5.95  | 2.1   | 4.07   |

|       |                 |       |       |      |      |      |       |      |       |       |       |
|-------|-----------------|-------|-------|------|------|------|-------|------|-------|-------|-------|
| 78670 | 'Plekhj1'       | 48.26 | 57.69 | 39.3 | 42.5 | 56.9 | 45.65 | 46.7 | 61.02 | 46.98 | 56.62 |
| 78672 | '9530057J20Rik' | 5.88  | 4.64  | 2.83 | 15.6 | 8.61 | 3.13  | 8.99 | 4.68  | 1.27  | 2.95  |
| 78688 | 'Nol3'          | 11.7  | 17.25 | 17   | 11.4 | 24.6 | 20.96 | 14   | 24.37 | 8.27  | 19.52 |
| 78689 | 'Naa35'         | 19.17 | 25.77 | 21.9 | 44.6 | 20.9 | 18.86 | 41.7 | 25.67 | 23.78 | 40.08 |
| 78697 | 'Pus7'          | 3.16  | 6.97  | 6.33 | 10.1 | 7.34 | 0.06  | 4.77 | 5.84  | 2.24  | 2.68  |
| 78703 | 'Zfp972'        | 0.89  | 0.63  | 3.76 | 10.6 | 0.99 | 0.54  | 4.98 | 0.4   | 2.09  | 3.4   |
| 78748 | 'Rassf10'       | 0.22  | 1.38  | 0    | 0    | 0    | 0     | 0    | 0     | 0     | 0     |
| 78749 | 'Filip11'       | 0     | 0.53  | 0    | 1.56 | 0    | 0     | 0.02 | 0     | 0     | 0.08  |
| 78751 | 'Zc3h6'         | 0.15  | 2.62  | 1.19 | 4.1  | 2.67 | 0.51  | 0.31 | 0.28  | 0.72  | 0.68  |
| 78752 | 'Csgalnact2'    | 0.93  | 1.51  | 0    | 7.42 | 0    | 3.62  | 0.02 | 1.4   | 0.05  | 3.93  |
| 78754 | 'Galnt15'       | 0     | 0.08  | 0    | 0    | 0    | 0     | 0    | 0     | 0     | 0     |
| 78755 | 'Fam122b'       | 1.25  | 2.27  | 0    | 0    | 0.01 | 0     | 2.32 | 4.01  | 0     | 3.86  |
| 78757 | 'Rictor'        | 12.91 | 14.98 | 34.4 | 13.6 | 26.1 | 15    | 28.4 | 9.16  | 19.93 | 24.66 |
| 78767 | 'Efcab11'       | 0     | 0     | 0    | 0    | 0    | 0     | 0.17 | 0     | 0     | 0     |
| 78771 | 'Mctp1'         | 0.22  | 1.46  | 0.55 | 0    | 0.74 | 0.32  | 1.19 | 0.69  | 0.34  | 1.18  |
| 78772 | 'Hhipl2'        | 1.43  | 0.86  | 0.29 | 1.41 | 0.13 | 0.25  | 0.04 | 0.81  | 0     | 0     |
| 78774 | 'Cfap61'        | 2.09  | 2.3   | 0.37 | 0    | 3.95 | 0     | 0    | 0.91  | 0     | 0.3   |
| 78777 | 'Tepsin'        | 5.24  | 7.25  | 16.9 | 4.84 | 2.45 | 12.71 | 14.9 | 15.09 | 5.88  | 6.78  |
| 78779 | 'Spata2l'       | 14.07 | 10.6  | 13.8 | 45.3 | 11   | 6.11  | 9.59 | 13.75 | 2.44  | 4.4   |
| 78781 | 'Zc3hav1'       | 2.6   | 1.08  | 4.78 | 6.21 | 1.83 | 2.64  | 2.69 | 0.87  | 0.08  | 0.07  |
| 78783 | 'Brpf1'         | 3.07  | 3.37  | 5.93 | 11.5 | 0    | 4.77  | 1.39 | 1.24  | 0.42  | 0.04  |
| 78784 | 'Celf3'         | 71.83 | 94.21 | 44   | 53.5 | 89.7 | 86.97 | 56.4 | 72.88 | 86.4  | 98.16 |
| 78785 | 'Clip4'         | 0.04  | 5.27  | 3.92 | 0.66 | 2.71 | 1.27  | 3.62 | 0.79  | 0.72  | 0.59  |
| 78787 | 'Usp54'         | 1.5   | 2.35  | 4.42 | 3.93 | 5.31 | 0.35  | 2.27 | 1.8   | 3.26  | 1.98  |
| 78789 | 'Vsig1'         | 0     | 0     | 0    | 0    | 7.26 | 15.93 | 0    | 0.02  | 32.46 | 5.98  |
| 78795 | 'Armc9'         | 25.14 | 21.75 | 25.8 | 25.6 | 30.9 | 16.04 | 29.5 | 40.22 | 23.06 | 41.58 |
| 78796 | 'Zcchc4'        | 6.45  | 6.73  | 2.56 | 6.95 | 3.93 | 3.79  | 7.24 | 7.13  | 8.21  | 14.43 |
| 78797 | 'Ndor1'         | 10.39 | 4.81  | 6.56 | 8.68 | 15.3 | 4.65  | 15.5 | 8.02  | 6.36  | 11.16 |
| 78798 | 'Eml4'          | 0.62  | 1.46  | 0.28 | 4.06 | 1.62 | 2.15  | 2.22 | 0.35  | 7.53  | 0.58  |
| 78801 | 'Ak7'           | 0.47  | 0     | 0    | 0    | 0    | 0     | 0    | 0.04  | 0     | 0     |
| 78802 | 'Ttc30a1'       | 7.02  | 6.03  | 4.67 | 5.88 | 0    | 0     | 4    | 2.67  | 4.03  | 10.51 |
| 78803 | 'Fbxo43'        | 0.05  | 0.04  | 0.07 | 0.03 | 0.08 | 0.09  | 0.06 | 0.01  | 0.07  | 0.09  |
| 78806 | 'Stpg1'         | 0.27  | 0     | 0.11 | 0    | 0    | 0     | 0.77 | 1.81  | 0.64  | 0.24  |
| 78808 | 'Sixbp5'        | 1.73  | 1.34  | 3.39 | 9.23 | 3.96 | 2.08  | 2.78 | 1.06  | 0.98  | 2.5   |
| 78809 | '4930562C15Rik' | 0     | 0.28  | 0    | 0.7  | 0    | 0     | 0    | 0     | 0.36  | 0     |
| 78816 | 'Gmip'          | 0.96  | 6.71  | 4.88 | 8.92 | 4.9  | 5.69  | 0    | 6.33  | 9.69  | 13.36 |
| 78825 | 'Desi2'         | 1.5   | 0.22  | 0.64 | 0.24 | 0.6  | 0.13  | 3.25 | 2.07  | 1.9   | 1.18  |
| 78829 | 'Tsc22d4'       | 14.1  | 19.01 | 9    | 13   | 24.9 | 29.32 | 34.7 | 10.11 | 16.93 | 12.85 |
| 78830 | 'Slc25a12'      | 110   | 117.7 | 152  | 87.4 | 60.5 | 62.33 | 126  | 143.7 | 89.18 | 87.4  |
| 78832 | 'Cacul1'        | 9.75  | 4.3   | 11.7 | 12   | 5.17 | 7.38  | 7.98 | 7.24  | 12.39 | 2.46  |
| 78833 | 'Gins3'         | 2.74  | 0     | 1.09 | 0    | 2.07 | 2.26  | 0    | 0     | 2.85  | 2.06  |
| 78834 | 'Zfp623'        | 9.81  | 10.71 | 8.72 | 0.27 | 15   | 6.24  | 7.98 | 15.85 | 7.85  | 1.98  |
| 78885 | 'Coro7'         | 9.69  | 8.68  | 8.8  | 13.6 | 23.5 | 14.88 | 20.2 | 23.81 | 22.48 | 12.02 |
| 78887 | 'Sfi1'          | 2.42  | 9.23  | 12.1 | 0.07 | 5.84 | 11.74 | 6.79 | 8.3   | 7.8   | 2.5   |
| 78889 | 'Wsb1'          | 101.7 | 134.7 | 92.5 | 113  | 103  | 69.3  | 97.4 | 101.2 | 210.1 | 116.8 |
| 78890 | 'Trmt44'        | 2.25  | 3.72  | 3.51 | 7.06 | 2.04 | 0     | 0    | 3.34  | 0.83  | 0.08  |
| 78891 | 'Scyl1'         | 20.31 | 44.88 | 32.5 | 21.4 | 18.8 | 25.48 | 47.3 | 45.34 | 38.41 | 29.49 |
| 78892 | 'Crispld2'      | 0     | 0     | 0.01 | 0.37 | 4.02 | 0.04  | 0    | 0     | 0     | 0     |
| 78893 | 'Cnot10'        | 22.44 | 27.69 | 30.6 | 61.2 | 26.7 | 34.4  | 22.5 | 41.14 | 27.36 | 40.58 |
| 78894 | 'Aacs'          | 22.33 | 21.84 | 13.8 | 6.58 | 20.6 | 12.35 | 13.2 | 18.71 | 30.16 | 25.17 |
| 78895 | 'Pus7l'         | 0     | 0     | 0    | 0    | 0    | 0     | 0    | 0     | 2.33  | 2.03  |
| 78896 | '1500015O10Rik' | 3.59  | 0     | 0    | 0    | 0    | 0.05  | 0    | 0     | 0     | 0     |
| 78903 | 'Wrnip1'        | 14.25 | 7.41  | 11   | 17   | 10.1 | 16.92 | 6.65 | 10.54 | 15.88 | 3.83  |
| 78906 | 'Misp'          | 1.93  | 0     | 0    | 0    | 0    | 0     | 0    | 0.35  | 0     | 0     |
| 78908 | 'Igsf3'         | 4.33  | 4.06  | 7.87 | 8.31 | 1.89 | 4.98  | 0.01 | 5.49  | 10.45 | 1.99  |
| 78910 | 'Asb15'         | 0     | 0     | 0.01 | 0    | 0    | 0.01  | 0    | 0     | 0.02  | 0     |
| 78912 | 'Sp2'           | 3.16  | 2.1   | 2.28 | 0    | 8.16 | 0.83  | 2.39 | 2.11  | 6.08  | 4.39  |
| 78913 | 'Ltn1'          | 1.99  | 1.45  | 12.4 | 2.3  | 2.61 | 0.62  | 2.01 | 2.77  | 4.85  | 4.31  |

|       |                 |       |       |      |      |      |       |      |       |       |        |
|-------|-----------------|-------|-------|------|------|------|-------|------|-------|-------|--------|
| 78914 | 'Nadsyn1'       | 5.82  | 8.17  | 4.34 | 13.1 | 6.06 | 2.27  | 5.61 | 3.85  | 5.5   | 12.61  |
| 78919 | 'Fndc8'         | 0     | 1.15  | 0    | 0    | 0.76 | 0     | 2.41 | 0     | 1.42  | 0.39   |
| 78920 | 'Dlst'          | 15.86 | 18.2  | 45.8 | 12.8 | 12.3 | 8.36  | 40.2 | 26.08 | 16.08 | 17.11  |
| 78921 | '9130019O22Rik' | 2.4   | 0.12  | 3.82 | 0.01 | 4.24 | 0.22  | 0.01 | 6.95  | 1.83  | 1.58   |
| 78923 | 'Chsy3'         | 1.08  | 1.02  | 0    | 0    | 0    | 0     | 0    | 0     | 0.22  | 1.34   |
| 78925 | 'Srd5a1'        | 12.79 | 6.28  | 1.46 | 5.09 | 11.2 | 2.68  | 11.7 | 15.17 | 2.22  | 0      |
| 78926 | 'Gas2l1'        | 4.46  | 1.16  | 0.44 | 5.99 | 4.74 | 0.16  | 0.75 | 2.71  | 10.21 | 0.95   |
| 78928 | 'Pigt'          | 31.39 | 25.22 | 46.9 | 1.12 | 14.9 | 24.43 | 48.1 | 24.9  | 40.14 | 14.04  |
| 78929 | 'Polar3h'       | 60.56 | 63.74 | 65   | 45.5 | 68.1 | 51.62 | 76.9 | 78.27 | 55.1  | 20.41  |
| 78933 | 'Agbl4'         | 14.51 | 10.83 | 16.4 | 19.5 | 17   | 11.01 | 5.52 | 10.98 | 3.95  | 12.8   |
| 78935 | 'Saal1'         | 3.01  | 10.17 | 6.28 | 8.2  | 7.73 | 1.32  | 22.9 | 10.52 | 6.46  | 4.72   |
| 78937 | 'Avl9'          | 2.2   | 1.79  | 2.05 | 2.25 | 3.3  | 1.32  | 4.17 | 2.92  | 2.08  | 3.48   |
| 78938 | 'Fbxo34'        | 13.49 | 17.48 | 8.55 | 40.9 | 3.38 | 16.31 | 19   | 18.76 | 23.83 | 19.82  |
| 78943 | 'Ern1'          | 0.61  | 0.05  | 0.12 | 0    | 0.18 | 0     | 1.28 | 0.07  | 0     | 0.47   |
| 78977 | 'Popdc3'        | 0     | 1.93  | 0    | 0    | 0    | 0     | 0    | 0     | 0.05  | 0      |
| 79043 | 'Spsb3'         | 47.74 | 41.25 | 51.4 | 9.61 | 33.4 | 49.01 | 46.9 | 46.81 | 46.23 | 32.48  |
| 79044 | 'Mrps34'        | 109   | 84.36 | 119  | 155  | 121  | 119.2 | 95.5 | 115.5 | 128.5 | 100.48 |
| 79059 | 'Nme3'          | 90.21 | 82.16 | 100  | 147  | 92.3 | 172.9 | 74.1 | 134.5 | 59.87 | 95.82  |
| 79196 | 'Osbp15'        | 3.19  | 5.19  | 0.04 | 2.49 | 1.86 | 0.17  | 15.6 | 0.74  | 7.11  | 4.49   |
| 79202 | 'Tnfrsf22'      | 2.71  | 1.63  | 6.42 | 3.33 | 4.16 | 1.73  | 2.19 | 1.91  | 2.63  | 0.98   |
| 79221 | 'Hdac9'         | 1.11  | 0.79  | 0.41 | 0.07 | 2.59 | 4.87  | 0    | 1.69  | 2.25  | 0.52   |
| 79233 | 'Zfp319'        | 0.81  | 3.99  | 3.04 | 0.15 | 0.83 | 0.84  | 2.7  | 1.27  | 0     | 0.92   |
| 79263 | 'Trim39'        | 5.38  | 1.52  | 1.89 | 4.92 | 13   | 0.25  | 5.8  | 4.34  | 3.8   | 9.22   |
| 79264 | 'Krit1'         | 7.94  | 5.52  | 5.82 | 3.5  | 3.99 | 4.69  | 7.85 | 6.73  | 11.39 | 5.81   |
| 79362 | 'Bhlhe41'       | 42.43 | 24.59 | 30.4 | 59.1 | 41.4 | 17.38 | 31.2 | 28.19 | 31.23 | 39.87  |
| 79401 | 'Spz1'          | 0     | 0     | 0    | 0    | 0    | 0     | 0    | 1.87  | 0     | 0      |
| 79456 | 'Recql4'        | 0     | 0     | 0    | 2.3  | 0.05 | 0     | 0    | 0     | 0     | 0.51   |
| 79464 | 'Lias'          | 18.02 | 18.16 | 32.6 | 28.2 | 35.1 | 42.17 | 13.7 | 19.12 | 25.24 | 25.56  |
| 79554 | 'Cptp'          | 15.01 | 21.53 | 39.3 | 33.4 | 14.5 | 29.13 | 20.2 | 43.87 | 37.15 | 10.98  |
| 79555 | 'BC005537'      | 5.87  | 1.93  | 8.81 | 7.53 | 2.36 | 2.81  | 3.42 | 2.06  | 10.52 | 2.14   |
| 79560 | 'Ublcp1'        | 38.99 | 16.78 | 46.9 | 18.3 | 42.5 | 47.2  | 50.9 | 35.35 | 46.63 | 32.81  |
| 79565 | 'Mettl27'       | 0     | 5.32  | 5.75 | 9.65 | 6.47 | 21.39 | 4.58 | 2.25  | 0.37  | 6.46   |
| 79566 | 'Sh3bp5l'       | 20.12 | 21.23 | 23.3 | 0.02 | 24.3 | 10.24 | 28.3 | 26.72 | 11.65 | 24.67  |
| 80280 | 'Cdk5rap3'      | 38.18 | 43.52 | 39.7 | 32.7 | 28.4 | 65.28 | 38.1 | 44.47 | 33.54 | 47.49  |
| 80281 | 'Cttnbp2nl'     | 1.12  | 0.39  | 0.94 | 3.52 | 2.87 | 0.5   | 0.01 | 1.29  | 0.63  | 3.23   |
| 80283 | 'Abtb1'         | 16.79 | 11.69 | 22.8 | 21.1 | 30.8 | 22.4  | 14.4 | 17.64 | 26.14 | 10.12  |
| 80284 | 'Smim12'        | 60.73 | 53.66 | 79.6 | 0    | 92.6 | 70.23 | 67.1 | 68.07 | 37.15 | 33.64  |
| 80285 | 'Parp9'         | 0.02  | 0.02  | 0.11 | 0.59 | 0.69 | 1.08  | 4.76 | 0     | 0     | 0      |
| 80286 | 'Tusc3'         | 281.9 | 359.9 | 227  | 318  | 253  | 286.5 | 350  | 214   | 265.4 | 223.06 |
| 80287 | 'Apobec3'       | 1.33  | 0.75  | 0.91 | 0    | 1.45 | 1.37  | 4.18 | 1.98  | 0.48  | 2.88   |
| 80288 | 'Bcl9l'         | 2.06  | 1.26  | 3.44 | 0.84 | 1.4  | 1.94  | 2.85 | 0.18  | 0.52  | 0.17   |
| 80289 | 'Lysmd3'        | 0     | 4.41  | 0.02 | 0    | 2.07 | 0.83  | 3.51 | 2.36  | 2.93  | 4.23   |
| 80290 | 'Gpr146'        | 0.74  | 2.39  | 1.76 | 3.31 | 0.01 | 1.94  | 4.85 | 1.22  | 1.34  | 2.06   |
| 80291 | 'Rilpl2'        | 25.7  | 15.96 | 15.4 | 24.5 | 28.7 | 10.88 | 14   | 15.03 | 25.17 | 8.59   |
| 80292 | 'Zxdc'          | 0.92  | 2.07  | 0.83 | 8.18 | 2.56 | 0.03  | 4.51 | 0.87  | 0     | 1.63   |
| 80294 | 'Pofut2'        | 33.88 | 42.01 | 18.6 | 28.8 | 43.6 | 29.62 | 9.91 | 34.57 | 43.25 | 43.71  |
| 80297 | 'Sptbn4'        | 0.89  | 2.48  | 0.97 | 0.45 | 4.41 | 0.2   | 3.6  | 1.83  | 3.46  | 2.11   |
| 80334 | 'Kcnp4'         | 107.1 | 59.31 | 65.9 | 35.5 | 41.6 | 70.39 | 27.7 | 29.72 | 60.73 | 74.08  |
| 80384 | 'Tex21'         | 0     | 0     | 0.22 | 0    | 0    | 0     | 0    | 0     | 0     | 0      |
| 80385 | 'Tusc2'         | 63.22 | 38.29 | 28.4 | 71.7 | 40.4 | 30.58 | 56.3 | 41.66 | 45.32 | 4.82   |
| 80509 | 'Med8'          | 16.8  | 19.54 | 27   | 13.8 | 8.73 | 16.77 | 9.78 | 29.86 | 44.98 | 21.62  |
| 80517 | 'Herpud2'       | 1.5   | 4.58  | 4.14 | 6.73 | 6.89 | 6.15  | 2.61 | 4.44  | 0     | 0      |
| 80707 | 'Wwox'          | 10.05 | 20.32 | 17.5 | 12.7 | 7.38 | 16.54 | 25.3 | 30.14 | 27.93 | 20.71  |
| 80708 | 'Pacsin3'       | 13.8  | 4.56  | 10.7 | 0.57 | 3.54 | 5.07  | 8    | 8.7   | 0.24  | 3.62   |
| 80718 | 'Rab27b'        | 9.65  | 13.85 | 6.2  | 12.4 | 39.3 | 14.84 | 9.2  | 13.45 | 28.02 | 36.34  |
| 80719 | 'Igsf6'         | 1.49  | 0     | 0.71 | 0.83 | 0    | 0     | 0.13 | 0     | 0     | 0      |
| 80720 | 'Pbx4'          | 20.28 | 17.7  | 21   | 15.2 | 24.1 | 21.99 | 29.5 | 12.11 | 14.95 | 36.68  |
| 80721 | 'Slc19a3'       | 0     | 0     | 0    | 0    | 0.08 | 0     | 0    | 0     | 0.08  | 0      |

|       |            |       |       |      |      |      |       |      |       |       |        |
|-------|------------|-------|-------|------|------|------|-------|------|-------|-------|--------|
| 80732 | 'Mynn'     | 4.81  | 3.81  | 0.87 | 2.58 | 2.38 | 0.45  | 2.15 | 4.42  | 7.34  | 6.16   |
| 80733 | 'Car15'    | 1.91  | 0.33  | 0    | 0    | 3.57 | 0.03  | 0    | 0.11  | 1     | 1.34   |
| 80743 | 'Vps16'    | 38.86 | 30.57 | 52.9 | 15.7 | 69.9 | 39.71 | 67.2 | 46.4  | 67.25 | 65.78  |
| 80744 | 'Cwc22'    | 0.73  | 7.25  | 5.29 | 2.5  | 6.24 | 1.74  | 0.31 | 3.63  | 1.5   | 3.82   |
| 80748 | 'BC004004' | 91.8  | 95.78 | 63.9 | 113  | 72.7 | 115.2 | 78   | 114.5 | 82.54 | 119.29 |
| 80749 | 'Lrfn1'    | 2.6   | 0     | 0.1  | 0.42 | 0.62 | 0.52  | 0.02 | 2.27  | 0.87  | 1.1    |
| 80750 | 'N4bp1'    | 4.67  | 6.24  | 3.27 | 6.44 | 4.16 | 4.47  | 2.36 | 2.83  | 4.34  | 7.17   |
| 80751 | 'Rnf34'    | 25.88 | 40.87 | 53.9 | 29.1 | 29   | 36.46 | 41.5 | 31.67 | 44.94 | 32.01  |
| 80752 | 'Fam20c'   | 32.19 | 24.46 | 20.8 | 31.5 | 18.2 | 14.89 | 47.4 | 28.64 | 15.33 | 10.63  |
| 80794 | 'Cb1c'     | 0     | 0.03  | 1.31 | 0    | 0    | 0     | 0    | 0     | 0     | 0      |
| 80795 | 'Selenok'  | 400   | 464.9 | 246  | 475  | 425  | 469.8 | 323  | 363.3 | 382.9 | 481.93 |
| 80797 | 'Clca3a2'  | 0     | 1.04  | 0    | 0.55 | 0.1  | 0.39  | 0    | 1.46  | 0     | 0.02   |
| 80837 | 'Rhoj'     | 2.25  | 1.3   | 0.87 | 1.2  | 1.37 | 1.48  | 3.45 | 0.12  | 1.05  | 0      |
| 80859 | 'Nfkbiz'   | 0     | 12.36 | 7.5  | 9.9  | 0.59 | 3.39  | 0.34 | 0.02  | 0.02  | 3.01   |
| 80860 | 'Ghdc'     | 1.39  | 3.96  | 8.86 | 12.5 | 11.2 | 14.6  | 0.1  | 3.33  | 2.1   | 6.76   |
| 80861 | 'Dhx58'    | 0.04  | 2.1   | 2.56 | 2    | 0    | 1.77  | 0    | 0.55  | 0     | 0.02   |
| 80876 | 'Ifitm2'   | 0     | 1.24  | 0.5  | 30.1 | 0.34 | 13.61 | 0    | 1.6   | 0.9   | 5.77   |
| 80877 | 'Lrba'     | 0.45  | 0.4   | 1.49 | 0.02 | 8.69 | 1.64  | 0.3  | 0.55  | 1.43  | 1.52   |
| 80879 | 'Slc16a3'  | 0     | 0     | 0    | 0    | 0    | 0     | 0    | 3.04  | 1.28  | 0      |
| 80880 | 'Kank3'    | 1.38  | 6.4   | 3.12 | 1.98 | 7.26 | 2.75  | 5.74 | 4.32  | 6.4   | 9.76   |
| 80883 | 'Ntng1'    | 15.3  | 6.27  | 0.44 | 14.2 | 6.56 | 2.11  | 9.7  | 4.89  | 0.03  | 0      |
| 80884 | 'Maged2'   | 98.63 | 134.4 | 131  | 150  | 86.3 | 116.3 | 141  | 160.2 | 115.6 | 130.53 |
| 80886 | 'Senp3'    | 23.06 | 13.55 | 15.4 | 8.52 | 24.3 | 10.23 | 6.25 | 17.22 | 14.64 | 14.64  |
| 80888 | 'Hspb8'    | 3.29  | 10.34 | 19.7 | 10.7 | 25   | 1.67  | 5.29 | 2.97  | 4.16  | 43.69  |
| 80889 | 'Tlnrd1'   | 1.14  | 2.23  | 0.06 | 3.78 | 0.35 | 0     | 1.21 | 0.16  | 0.78  | 1.33   |
| 80890 | 'Trim2'    | 36.98 | 38.94 | 43.1 | 23.4 | 30.8 | 24.08 | 33.7 | 34.92 | 28.64 | 35.2   |
| 80891 | 'Fcr1s'    | 1.44  | 5.29  | 3.78 | 5.94 | 6.89 | 18.72 | 0    | 0     | 0     | 0      |
| 80892 | 'Zfhx4'    | 3.4   | 1.57  | 3.5  | 3.47 | 3.33 | 5.05  | 2.59 | 3.93  | 3.97  | 4.23   |
| 80893 | 'Tmprss5'  | 0     | 0     | 0    | 0    | 0    | 0     | 0    | 0     | 0     | 0.13   |
| 80898 | 'Erap1'    | 1.24  | 0.01  | 0.83 | 0    | 0    | 0     | 1.2  | 1.55  | 8.74  | 1.74   |
| 80902 | 'Zfp202'   | 3.11  | 5.74  | 0.57 | 3.05 | 1.9  | 6.31  | 1.08 | 4.53  | 0.57  | 1.48   |
| 80904 | 'Dtx3'     | 81.51 | 76.86 | 78.4 | 36.6 | 135  | 55.08 | 119  | 97.9  | 128.1 | 108.51 |
| 80905 | 'Polh'     | 1.64  | 1.98  | 2.71 | 0.55 | 1.48 | 0.01  | 0.94 | 0.88  | 0.48  | 0.56   |
| 80906 | 'Kcnp2'    | 8     | 15.55 | 14.1 | 7.48 | 21.3 | 35.24 | 2.9  | 8.25  | 12.06 | 51.66  |
| 80907 | 'Lactb'    | 0     | 1.47  | 3.91 | 1.88 | 2.07 | 0     | 2.45 | 1.83  | 1.36  | 0.18   |
| 80909 | 'Castor2'  | 11.78 | 11.73 | 7.59 | 4.34 | 4.64 | 2.95  | 3.76 | 4.54  | 8.94  | 6.35   |
| 80910 | 'Gpr84'    | 0     | 0.98  | 0    | 10.4 | 0    | 8.74  | 0.03 | 0     | 0     | 0      |
| 80911 | 'Acox3'    | 1.74  | 4.32  | 11.1 | 3.16 | 7.41 | 1.15  | 2.54 | 8.34  | 3.51  | 2.89   |
| 80912 | 'Pum1'     | 23.04 | 20.9  | 21.8 | 28.5 | 17.8 | 14.52 | 28.4 | 18.38 | 26.78 | 26.32  |
| 80913 | 'Pum2'     | 9.37  | 9.55  | 6.46 | 16.2 | 11.9 | 6.2   | 5.98 | 5.77  | 7.7   | 7.88   |
| 80914 | 'Uck2'     | 2.15  | 1.1   | 4.39 | 4.02 | 4.23 | 0     | 7.58 | 4.42  | 3.53  | 0.3    |
| 80915 | 'Dusp12'   | 13.1  | 14.5  | 7.56 | 0    | 2.22 | 20.67 | 20.7 | 32.28 | 30.37 | 15.03  |
| 80976 | 'Sy113'    | 53.51 | 30.96 | 64.7 | 17.4 | 41.7 | 16.84 | 36.3 | 34    | 61.59 | 18.39  |
| 80979 | 'Slc26a5'  | 0     | 0     | 0.05 | 0    | 0    | 1.18  | 1.18 | 0     | 0     | 0.08   |
| 80981 | 'Arl4d'    | 10.88 | 0     | 3.08 | 0    | 6.08 | 0     | 7.81 | 4.93  | 0.03  | 0.03   |
| 80982 | 'Cemip'    | 0     | 0.45  | 0    | 0    | 0    | 1.07  | 0    | 0.89  | 0.01  | 0      |
| 80985 | 'Trim44'   | 10.99 | 6     | 11.3 | 16.8 | 4.4  | 11.85 | 8.24 | 3.69  | 5.07  | 5.33   |
| 80986 | 'Ckap2'    | 0     | 1.61  | 0    | 0    | 0    | 0     | 0    | 0     | 0     | 0      |
| 80987 | 'Nckip2d'  | 48.8  | 26.69 | 53.3 | 23.4 | 36.9 | 41.31 | 102  | 47.09 | 42.69 | 40.72  |
| 81000 | 'Rad54l2'  | 2.01  | 1.07  | 2.37 | 0.61 | 3.39 | 2.74  | 1.76 | 0.72  | 0     | 0.97   |
| 81003 | 'Trim23'   | 12.06 | 13.82 | 14.5 | 18   | 8.54 | 6.48  | 6.63 | 13.95 | 10.79 | 12.93  |
| 81004 | 'Tbl1xr1'  | 0.48  | 0.83  | 1.75 | 0    | 1.51 | 0.77  | 1.87 | 0.45  | 1.21  | 0.06   |
| 81011 | 'Vmn1r148' | 0     | 0     | 0.02 | 0    | 0    | 0.29  | 0    | 0     | 0     | 0      |
| 81013 | 'Vmn1r65'  | 0.38  | 0.22  | 0.49 | 1.1  | 0.85 | 0.28  | 0.7  | 0.43  | 0.37  | 0.33   |
| 81014 | 'Vmn1r58'  | 10.98 | 13.26 | 14.5 | 20.4 | 16.4 | 10.67 | 15.9 | 9     | 16.23 | 11.73  |
| 81018 | 'Rnf114'   | 39.67 | 41.61 | 32.3 | 21.4 | 51.8 | 29.24 | 52   | 44.28 | 36.85 | 39.85  |
| 81489 | 'Dnajb1'   | 72.17 | 128.2 | 118  | 227  | 36   | 60.04 | 54.8 | 44.32 | 67.91 | 114.97 |
| 81500 | 'Sil1'     | 86    | 95.84 | 52.1 | 55.7 | 52.2 | 80.7  | 66.4 | 61.9  | 112   | 97.09  |

|       |            |       |       |      |      |      |       |      |       |       |        |
|-------|------------|-------|-------|------|------|------|-------|------|-------|-------|--------|
| 81535 | 'Sgpp1'    | 1.2   | 4.8   | 4.46 | 1.96 | 5.01 | 4.67  | 2.22 | 4.85  | 1.36  | 0      |
| 81600 | 'Chia1'    | 0     | 3.22  | 0.03 | 9.84 | 23.7 | 7.01  | 0.37 | 0     | 0     | 2.94   |
| 81601 | 'Kat5'     | 41.97 | 34    | 30.7 | 20.9 | 27.9 | 45.2  | 33.2 | 54.23 | 35.85 | 33.52  |
| 81630 | 'Zbtb22'   | 0.02  | 7.25  | 9.39 | 0    | 6.31 | 2.24  | 5.34 | 0.81  | 1.83  | 0      |
| 81701 | 'Egfl8'    | 0     | 0.04  | 0.3  | 0    | 0    | 1.47  | 0.29 | 0     | 0     | 0      |
| 81702 | 'Ankrd17'  | 12.98 | 15.62 | 12.7 | 13.8 | 7.79 | 7.77  | 7.58 | 9.55  | 17.69 | 8.35   |
| 81703 | 'Jdp2'     | 0.9   | 0.25  | 0.19 | 2.63 | 0.47 | 1.09  | 0.13 | 0.23  | 0.96  | 0      |
| 81799 | 'C1qtnf3'  | 0     | 0     | 0    | 0    | 0    | 0     | 0    | 0     | 0     | 0.05   |
| 81840 | 'Sorcs2'   | 0.63  | 1.54  | 3.35 | 0.02 | 1.47 | 4.05  | 0    | 0.85  | 5.01  | 4.48   |
| 81845 | 'Gpank1'   | 9.84  | 13.47 | 24.3 | 1.43 | 26   | 15.84 | 12.1 | 35.39 | 14.62 | 23.01  |
| 81877 | 'Tnxb'     | 0.9   | 1.74  | 4.06 | 6.46 | 1.18 | 0.29  | 0.71 | 0.02  | 1.54  | 0.26   |
| 81879 | 'Tfcp2l1'  | 0.55  | 0     | 0    | 0    | 0    | 0.01  | 0.01 | 0.69  | 0.03  | 0      |
| 81896 | 'Ift122'   | 6.56  | 5.75  | 2.96 | 14.5 | 13.3 | 6.34  | 10.2 | 8.45  | 5.2   | 14.62  |
| 81898 | 'Sf3b1'    | 119.4 | 86.25 | 103  | 136  | 97.7 | 99.69 | 85.9 | 97.97 | 107.5 | 120.65 |
| 81904 | 'Cacng7'   | 0     | 0.09  | 1.11 | 0.22 | 0    | 0.67  | 0    | 0     | 0     | 0.21   |
| 81905 | 'Cacng8'   | 0.03  | 0.9   | 0.23 | 0.24 | 0    | 0.13  | 0    | 0.25  | 2.49  | 1.01   |
| 81906 | 'Cyp4x1'   | 5.27  | 17    | 9.58 | 7.92 | 1.44 | 2.49  | 7.71 | 8.1   | 7.53  | 16.43  |
| 81907 | 'Tmem108'  | 12.7  | 5.25  | 19.1 | 6.47 | 17.7 | 12.04 | 13   | 13.43 | 17.07 | 24.5   |
| 81909 | 'Zfp11'    | 71.17 | 70.29 | 67.3 | 63.4 | 63.6 | 81.66 | 56.3 | 51.98 | 99    | 85.28  |
| 81910 | 'Rrbp1'    | 2.48  | 5.51  | 5.15 | 25.6 | 8    | 5.55  | 4.27 | 3.66  | 6.6   | 2.41   |
| 83383 | 'Tfap4'    | 0     | 1.79  | 0.05 | 0    | 0.21 | 1.79  | 2.67 | 3.96  | 1.69  | 2.72   |
| 83396 | 'Glis2'    | 0.25  | 1.29  | 3.47 | 0    | 4.26 | 0.14  | 0.27 | 1.67  | 1.51  | 1.03   |
| 83397 | 'Akap12'   | 0.97  | 2.4   | 4.35 | 11.4 | 4.16 | 1.88  | 1.11 | 2.23  | 2     | 5.96   |
| 83398 | 'Ndst3'    | 2.13  | 0.97  | 2.83 | 3.09 | 3.49 | 6.44  | 8.58 | 3.72  | 1.74  | 2.89   |
| 83408 | 'Gimap3'   | 0     | 0.02  | 0    | 0    | 0.05 | 0     | 0    | 0     | 0     | 0      |
| 83409 | 'Lamtor2'  | 219   | 242   | 222  | 303  | 254  | 377.6 | 296  | 310.4 | 375.8 | 265.93 |
| 83410 | 'Cstf2t'   | 36.73 | 26.28 | 40   | 22.8 | 17.1 | 4.37  | 40.6 | 28.51 | 41.78 | 35.73  |
| 83428 | 'Ucn3'     | 0     | 0.03  | 0.07 | 0.04 | 0.03 | 111.8 | 0    | 0     | 207.1 | 27.12  |
| 83429 | 'Ctns'     | 8.3   | 12.53 | 10.8 | 10.4 | 5.31 | 11.52 | 0.06 | 12.02 | 6.05  | 7.97   |
| 83430 | 'Il23a'    | 0     | 2.01  | 0    | 0    | 0    | 0     | 0    | 0.03  | 0     | 0      |
| 83431 | 'Ndel1'    | 71.49 | 78.89 | 63.5 | 102  | 41   | 42.06 | 37.9 | 65.46 | 53.81 | 63.52  |
| 83433 | 'Trem2'    | 0     | 7.21  | 0.05 | 10.8 | 6    | 86.16 | 6.52 | 4.55  | 0.04  | 4.12   |
| 83434 | 'Rsph6a'   | 0     | 0     | 0.47 | 0    | 0    | 0.55  | 0    | 0     | 0     | 0.19   |
| 83435 | 'Plekha3'  | 7.29  | 2.98  | 0.65 | 7.03 | 1.94 | 9.13  | 2.65 | 0.92  | 2.59  | 3.18   |
| 83436 | 'Plekha2'  | 0.01  | 0.04  | 0.33 | 3.53 | 0.08 | 0     | 3.31 | 0.05  | 3.67  | 0      |
| 83453 | 'Chrdl1'   | 0     | 0     | 1.98 | 0    | 0    | 0     | 0    | 0     | 0     | 0      |
| 83454 | 'Nxf2'     | 0     | 0     | 0    | 4.13 | 0    | 0     | 0    | 0     | 0     | 1.03   |
| 83456 | 'Mov10l1'  | 0.03  | 0     | 0.09 | 0.03 | 0    | 0.03  | 0.06 | 0     | 0     | 0.08   |
| 83485 | 'Ngrn'     | 44.81 | 50.42 | 62.7 | 67.2 | 64.7 | 53.32 | 55.1 | 54.08 | 50.87 | 49.47  |
| 83486 | 'Rbm5'     | 68.49 | 64.06 | 61.5 | 73.7 | 49.8 | 47.98 | 48.2 | 59.88 | 49.46 | 84.65  |
| 83490 | 'Pik3ap1'  | 0     | 0     | 0    | 0    | 0.22 | 0     | 0    | 0.56  | 0     | 0      |
| 83493 | 'Sacm1l'   | 37.6  | 20.06 | 19.8 | 23.4 | 18   | 16.66 | 36.1 | 31.39 | 43.01 | 39.95  |
| 83553 | 'Tktl1'    | 0     | 1.95  | 0.06 | 0    | 0    | 0     | 0    | 0.03  | 0     | 0      |
| 83554 | 'Fstl3'    | 0     | 9.59  | 1.41 | 0    | 4.5  | 0     | 0.31 | 0     | 0     | 1.84   |
| 83555 | 'Tex13b'   | 0.02  | 0     | 0    | 0    | 0    | 0     | 0    | 0     | 0     | 0      |
| 83556 | 'Tex16'    | 0     | 0     | 0.01 | 0    | 0    | 0     | 0    | 0.13  | 0.02  | 1.45   |
| 83557 | 'Lin28a'   | 0     | 0     | 0    | 0    | 0    | 0     | 0    | 0.02  | 0     | 0      |
| 83560 | 'Tex14'    | 0.01  | 0     | 0    | 0    | 0    | 0     | 0    | 0     | 0.04  | 3.33   |
| 83602 | 'Gtf2a1'   | 7.78  | 7.51  | 8.01 | 7    | 6.34 | 1.2   | 7.96 | 4.7   | 4.24  | 7.28   |
| 83603 | 'Elov14'   | 25.68 | 29.68 | 23.1 | 9.93 | 24.5 | 10.86 | 33.1 | 35.38 | 24.72 | 21.37  |
| 83669 | 'Wdr6'     | 271.5 | 223.9 | 358  | 233  | 307  | 128.2 | 235  | 291.4 | 229.5 | 310.53 |
| 83671 | 'Sytl2'    | 3.28  | 0     | 0.65 | 0    | 8.46 | 5.38  | 10.8 | 6.14  | 6.63  | 2.11   |
| 83674 | 'Cnrm1'    | 5     | 1.93  | 8.22 | 6.84 | 8.26 | 7.89  | 6.12 | 7.51  | 5.06  | 9.41   |
| 83675 | 'Bicc1'    | 0     | 0     | 0    | 1.59 | 0.01 | 0.8   | 0    | 0.11  | 0     | 0.01   |
| 83679 | 'Pde4dip'  | 12.03 | 13.1  | 19.2 | 14.2 | 10.3 | 7.61  | 4.71 | 9.99  | 8.5   | 8.24   |
| 83691 | 'Crispld1' | 0     | 2.7   | 0    | 0    | 2.69 | 0.98  | 3.11 | 0.97  | 0     | 0.33   |
| 83701 | 'Srrt'     | 26.14 | 16.13 | 17.2 | 15   | 25.4 | 28.68 | 19.8 | 29.35 | 29.59 | 17.22  |
| 83703 | 'Dbr1'     | 12.61 | 10.76 | 16.9 | 21.9 | 3.29 | 3.06  | 15.6 | 12.36 | 12.23 | 12.32  |

|       |           |       |       |      |      |      |       |      |       |       |        |
|-------|-----------|-------|-------|------|------|------|-------|------|-------|-------|--------|
| 83704 | 'Slc12a9' | 0.73  | 11.22 | 9.68 | 5.11 | 6.13 | 1.14  | 12   | 3.6   | 0.12  | 0.79   |
| 83762 | 'Otof'    | 0.01  | 2.12  | 9.94 | 2.21 | 2.23 | 1.76  | 11.6 | 2.02  | 1.34  | 0.51   |
| 83766 | 'Actl6b'  | 64.08 | 82.35 | 64.3 | 74.6 | 94.2 | 51.15 | 62.6 | 75.44 | 75.02 | 104.53 |
| 83767 | 'Wasf1'   | 17.55 | 12.32 | 16.3 | 25.3 | 24.9 | 2.92  | 14.4 | 12.62 | 21.3  | 6.03   |
| 83768 | 'Dpp7'    | 53.01 | 35.03 | 16.1 | 45.4 | 40.5 | 62.56 | 30   | 32.42 | 20.79 | 52.93  |
| 83770 | 'Tas1r2'  | 0     | 0     | 0    | 1.44 | 0    | 0     | 0    | 0     | 0     | 0      |
| 83771 | 'Tas1r3'  | 0     | 0     | 0    | 0    | 1.04 | 0     | 0.01 | 0     | 0     | 0      |
| 83796 | 'Smarcd2' | 2.39  | 4.27  | 0    | 0    | 2.26 | 0     | 2.67 | 0     | 0.8   | 0      |
| 83797 | 'Smarcd1' | 6.03  | 8.26  | 6.28 | 11.4 | 7.74 | 3.03  | 2.83 | 5.05  | 5.16  | 3.61   |
| 83813 | 'Tnk1'    | 0.02  | 0     | 0    | 0    | 0    | 0     | 1.67 | 0     | 0     | 0      |
| 83814 | 'Nedd4l'  | 7.77  | 7.31  | 4.73 | 8.98 | 7.94 | 8.44  | 3.83 | 6.51  | 10.87 | 6.93   |
| 83815 | 'Cenpq'   | 4.63  | 1.18  | 6.19 | 0    | 3.08 | 0.39  | 0    | 2.4   | 0     | 0.81   |
| 83885 | 'Slc25a2' | 0.67  | 0     | 0    | 0    | 0    | 0     | 0    | 0     | 0     | 1.87   |
| 83921 | 'Cemip2'  | 2.51  | 2.4   | 1.4  | 2    | 1.06 | 1.39  | 1.52 | 0.7   | 0.22  | 0.84   |
| 83922 | 'Cep41'   | 5.68  | 8.65  | 1.06 | 0.15 | 1.71 | 2.16  | 13.1 | 3.16  | 8.54  | 17.37  |
| 83924 | 'Gpr137b' | 7.44  | 1.64  | 7.14 | 16.1 | 5.55 | 13.26 | 10.5 | 6.93  | 20.17 | 14.25  |
| 83925 | 'Trps1'   | 0.51  | 4.69  | 0.14 | 4.67 | 0.84 | 0.33  | 1.47 | 0.04  | 0.88  | 0.94   |
| 83945 | 'Dnaja3'  | 51.95 | 45.16 | 51.4 | 43.2 | 31.1 | 44.23 | 66   | 63.36 | 56.05 | 72.69  |
| 83946 | 'Phip'    | 3.57  | 6.14  | 4.97 | 11.2 | 8.54 | 4.47  | 2.89 | 4.33  | 8.15  | 8.58   |
| 83961 | 'Nrg4'    | 1.08  | 0.31  | 1.15 | 0.9  | 0    | 2.41  | 0.57 | 2.14  | 1.17  | 0      |
| 83962 | 'Btbd1'   | 8.26  | 15.71 | 4.16 | 9.78 | 8.36 | 8.45  | 4.34 | 7.11  | 2.39  | 9.73   |
| 83964 | 'Jam3'    | 6.05  | 15.81 | 17.9 | 0.93 | 14.9 | 15.93 | 9.96 | 9.71  | 5.74  | 7.28   |
| 83965 | 'Enpp5'   | 160.9 | 154.3 | 127  | 128  | 155  | 170.1 | 113  | 171.6 | 200.6 | 181.63 |
| 83984 | 'Tssk6'   | 2.47  | 6.84  | 0    | 0    | 1.84 | 6.97  | 3.88 | 0     | 4.83  | 0      |
| 83997 | 'Slmap'   | 2.57  | 2.74  | 5.96 | 5.78 | 4.09 | 0.55  | 1.62 | 0.9   | 2.35  | 1.78   |
| 84004 | 'Mcam'    | 0.08  | 0.1   | 6.8  | 0    | 0.07 | 0.02  | 0    | 0     | 0     | 0      |
| 84035 | 'Kremen1' | 0.01  | 0.84  | 0    | 0    | 0    | 0     | 0    | 0.01  | 0     | 0      |
| 84036 | 'Kcnn1'   | 1.52  | 0.01  | 5.2  | 0    | 0    | 0     | 1.5  | 3.8   | 0     | 0.01   |
| 84092 | 'Usp8'    | 31.73 | 16.34 | 28.4 | 35.5 | 17.5 | 21.83 | 42.7 | 36.16 | 35.81 | 27.01  |
| 84094 | 'Plvap'   | 11.79 | 16.44 | 32.3 | 3.31 | 10.5 | 36.25 | 27.5 | 15.77 | 19.87 | 15.97  |
| 84095 | 'Pi4k2a'  | 2.66  | 3.81  | 6.1  | 23.5 | 14.4 | 0.24  | 3.26 | 5.39  | 3.4   | 2.36   |
| 84111 | 'Gpr87'   | 1.3   | 0     | 0.44 | 0    | 0    | 0     | 0    | 0     | 0     | 0.69   |
| 84113 | 'Ptov1'   | 38.97 | 47.27 | 53.1 | 75.1 | 55.7 | 86.51 | 79.2 | 58.22 | 43.59 | 46.84  |
| 84505 | 'Setdb1'  | 2.26  | 9.33  | 8.1  | 3.41 | 6.64 | 2.04  | 2.88 | 5.01  | 5.97  | 9.8    |
| 84544 | 'Cd96'    | 0     | 0.68  | 0    | 0    | 0    | 0     | 0    | 0     | 0     | 0      |
| 84585 | 'Rnf123'  | 10.2  | 10.2  | 13.8 | 2.4  | 6.2  | 1.87  | 14.2 | 10.61 | 15.44 | 12.85  |
| 84652 | 'Fam126a' | 2.46  | 3.7   | 5.42 | 0.04 | 1.19 | 1.32  | 1.28 | 0.3   | 1.67  | 3.18   |
| 84653 | 'Hes7'    | 0.02  | 0.05  | 0.26 | 0.06 | 0    | 0.21  | 0    | 0.04  | 0     | 0      |
| 84682 | 'Cox4i2'  | 0     | 0     | 0    | 0    | 0    | 0     | 0    | 0     | 0     | 2.32   |
| 84704 | 'Snurf'   | 55.05 | 74.86 | 71.4 | 61.7 | 88.8 | 101.1 | 74   | 74.75 | 59.81 | 113.08 |
| 85031 | 'Pla1a'   | 1.05  | 0.24  | 0    | 3.78 | 0    | 0     | 0    | 1.12  | 0     | 0      |
| 85305 | 'Kars'    | 67.74 | 60.91 | 80.5 | 51.8 | 94.4 | 63.94 | 104  | 71.73 | 91.64 | 67.69  |
| 85308 | 'Emc9'    | 187.1 | 110.4 | 128  | 139  | 161  | 301.5 | 140  | 201.3 | 111   | 143.82 |
| 93670 | 'Tac4'    | 1.05  | 0     | 0.59 | 0    | 0    | 0     | 0    | 0     | 0     | 0      |
| 93671 | 'Cd163'   | 0.42  | 0     | 0    | 0    | 0    | 0     | 0    | 0     | 0     | 0      |
| 93674 | 'Nat8f3'  | 0     | 0     | 0    | 0    | 0.4  | 0     | 0    | 0     | 0     | 0      |
| 93675 | 'Clec2i'  | 0     | 0     | 0    | 0.1  | 0    | 0     | 0.04 | 0     | 0.1   | 0      |
| 93677 | 'Lmod2'   | 0.02  | 0     | 0.1  | 0.03 | 0.05 | 0.02  | 0.03 | 0     | 0.09  | 0.02   |
| 93679 | 'Trim8'   | 12.82 | 14.33 | 11   | 15.6 | 9.41 | 6.53  | 16.3 | 5.63  | 10.72 | 8.31   |
| 93681 | 'Zkscan8' | 0.11  | 3.68  | 1.58 | 0    | 3.15 | 0.13  | 0    | 3.52  | 0     | 1.76   |
| 93683 | 'Glce'    | 7.09  | 2.8   | 2.14 | 1.25 | 7.14 | 0.2   | 5.49 | 3.38  | 4.8   | 9.82   |
| 93684 | 'Selenof' | 271.2 | 206.8 | 238  | 318  | 291  | 289.7 | 247  | 254.2 | 176.9 | 294.92 |
| 93685 | 'Entpd7'  | 2.1   | 3.58  | 3.91 | 0.9  | 1.06 | 1     | 0.84 | 0.81  | 0.12  | 2.86   |
| 93686 | 'Rbfox2'  | 20.09 | 14.77 | 14.4 | 14.2 | 22.7 | 11.17 | 30.9 | 17.9  | 15.03 | 18.48  |
| 93687 | 'Csnk1a1' | 99.64 | 134.4 | 110  | 91.4 | 85.8 | 89.9  | 123  | 103.9 | 88.09 | 105.15 |
| 93688 | 'Klhl1'   | 21.39 | 2.96  | 0.02 | 0.83 | 6.77 | 2.95  | 19.9 | 13.45 | 6.17  | 4.56   |
| 93689 | 'Lmod1'   | 0.1   | 0.36  | 0    | 0    | 0    | 0     | 0    | 0     | 0.14  | 0.12   |
| 93690 | 'Gpr45'   | 0.89  | 1.85  | 0.01 | 0    | 0    | 0     | 1.19 | 0.97  | 2.41  | 0.82   |

|       |             |       |       |      |      |      |       |      |       |       |        |
|-------|-------------|-------|-------|------|------|------|-------|------|-------|-------|--------|
| 93691 | 'Klf7'      | 29.81 | 18.39 | 20   | 45.9 | 15.8 | 40.58 | 2.91 | 6.87  | 28.7  | 42.85  |
| 93692 | 'Glrx'      | 38.36 | 34.32 | 63.1 | 26.9 | 47.8 | 55.31 | 69.3 | 67.62 | 64.42 | 7.19   |
| 93695 | 'Gpnmb'     | 1.63  | 0     | 0    | 0    | 0    | 0     | 0    | 0     | 0     | 0      |
| 93696 | 'Chrac1'    | 88.24 | 61.05 | 59.9 | 23.5 | 98.8 | 84.16 | 86.5 | 62.23 | 54.62 | 61.17  |
| 93697 | 'Ice2'      | 5.71  | 3.71  | 1.77 | 1.32 | 2.21 | 1.48  | 1.62 | 3.28  | 4.95  | 2.49   |
| 93699 | 'Pcdhgb1'   | 0     | 1.93  | 0.59 | 0    | 0    | 0.1   | 0    | 1.2   | 0     | 0.1    |
| 93700 | 'Pcdhgb2'   | 0     | 0.9   | 4.4  | 15.3 | 2.27 | 0.46  | 0.02 | 2.06  | 0     | 4.31   |
| 93701 | 'Pcdhgb4'   | 0.75  | 1.89  | 4    | 0.04 | 0    | 0     | 0    | 0     | 1.08  | 0      |
| 93702 | 'Pcdhgb5'   | 0     | 0     | 0.74 | 0    | 0    | 0     | 0    | 0.65  | 3.06  | 0.56   |
| 93703 | 'Pcdhgb6'   | 3.61  | 10.28 | 8.26 | 0    | 1.53 | 3.86  | 6.67 | 1.16  | 14.56 | 7.24   |
| 93704 | 'Pcdhgb7'   | 1.87  | 0.64  | 4.79 | 0    | 3.85 | 0.88  | 6.27 | 2.96  | 0     | 2.78   |
| 93705 | 'Pcdhgb8'   | 1.35  | 0.21  | 1.62 | 0    | 0    | 0     | 3.71 | 0     | 0     | 0      |
| 93706 | 'Pcdhgc3'   | 1.73  | 3.65  | 5.83 | 0    | 0.13 | 0.06  | 1.85 | 0     | 0.05  | 1.65   |
| 93707 | 'Pcdhgc4'   | 20.63 | 13.67 | 10.5 | 7.19 | 11.2 | 7.97  | 21.9 | 17.88 | 20.99 | 23.47  |
| 93708 | 'Pcdhgc5'   | 7.02  | 0     | 4.33 | 0.86 | 3.58 | 0.03  | 0    | 0.84  | 0.02  | 6.87   |
| 93709 | 'Pcdhga1'   | 0     | 2.53  | 3.48 | 0    | 0    | 0     | 0    | 0     | 0     | 0      |
| 93710 | 'Pcdhga2'   | 0.95  | 1.66  | 12   | 0    | 3.84 | 0     | 0.09 | 1.49  | 2.58  | 0      |
| 93711 | 'Pcdhga3'   | 2.95  | 3.74  | 0.21 | 0    | 8.51 | 1.26  | 1.1  | 0.23  | 4.23  | 4.35   |
| 93712 | 'Pcdhga4'   | 2     | 2.27  | 8.84 | 0    | 7.92 | 0.36  | 2.65 | 5.3   | 2.79  | 4.92   |
| 93713 | 'Pcdhga5'   | 0.14  | 2.53  | 2.14 | 4.62 | 2.52 | 4.95  | 0    | 2.05  | 0     | 6.58   |
| 93714 | 'Pcdhga6'   | 2.85  | 2.52  | 13.8 | 0.56 | 6.29 | 0.09  | 0.66 | 7.67  | 6.16  | 1.67   |
| 93715 | 'Pcdhga7'   | 9.71  | 12.21 | 9.8  | 5.36 | 6.76 | 8.5   | 13.4 | 6.24  | 4.58  | 7.64   |
| 93716 | 'Pcdhga8'   | 0.48  | 1.49  | 8.92 | 0    | 0    | 0.22  | 0    | 5.51  | 2.98  | 9.38   |
| 93717 | 'Pcdhga9'   | 2.57  | 1.29  | 1.19 | 4.1  | 0    | 1.13  | 0    | 0     | 0     | 0.56   |
| 93721 | 'Cpn1'      | 0     | 0.03  | 0    | 0    | 0    | 0     | 0    | 0     | 0     | 0      |
| 93722 | 'Pcdhga10'  | 0.35  | 2.86  | 2.26 | 0    | 0    | 1.33  | 0    | 3.55  | 0     | 0      |
| 93723 | 'Pcdhga11'  | 9.85  | 1.45  | 2.64 | 3    | 2.33 | 0.11  | 3.22 | 2.93  | 2.82  | 4.92   |
| 93724 | 'Pcdhga12'  | 2.47  | 3.29  | 1.73 | 0    | 0.44 | 2.69  | 0    | 5.26  | 10.22 | 1.18   |
| 93728 | 'Pabpc5'    | 0     | 0     | 2.03 | 0    | 1.93 | 4.1   | 0    | 0     | 0.14  | 0      |
| 93730 | 'Lztf11'    | 9.79  | 7.05  | 9.7  | 5.5  | 10.9 | 10.63 | 8.24 | 8.38  | 3.01  | 10.2   |
| 93734 | 'Mpv17l'    | 37.2  | 35.9  | 20.9 | 42.6 | 31   | 26.37 | 19.9 | 36.42 | 30.87 | 30.22  |
| 93735 | 'Wnt16'     | 0     | 0     | 0    | 0    | 1.27 | 0     | 0    | 0     | 0     | 0      |
| 93736 | 'Aff4'      | 9.15  | 5.39  | 7.28 | 9.78 | 5.2  | 1.11  | 5.18 | 4.16  | 2.9   | 4.88   |
| 93737 | 'Pard6g'    | 0.69  | 0.47  | 1.67 | 8.24 | 0.46 | 4.03  | 0.18 | 2.59  | 2.7   | 0      |
| 93739 | 'Gabarapl2' | 541.3 | 682.7 | 555  | 653  | 498  | 714.1 | 571  | 458.3 | 530.2 | 651.81 |
| 93742 | 'Pard3'     | 5.41  | 2.6   | 1.56 | 0.04 | 3.14 | 0.83  | 1.1  | 2.97  | 0.46  | 0.49   |
| 93746 | 'Gprc5d'    | 0     | 0.99  | 0    | 0.22 | 0    | 0.39  | 0    | 0     | 0     | 0      |
| 93747 | 'Echs1'     | 36.78 | 38.61 | 48.5 | 28.1 | 43.8 | 74.74 | 49.2 | 57.73 | 48.07 | 32.96  |
| 93757 | 'Immpt2l'   | 7.04  | 2.62  | 10.5 | 6.34 | 17.1 | 13.26 | 14.9 | 1.44  | 0     | 8      |
| 93759 | 'Sirt1'     | 1.09  | 0.35  | 1.53 | 0    | 0.15 | 1.49  | 2.36 | 2     | 2.17  | 1.58   |
| 93760 | 'Arid1a'    | 5.25  | 8.59  | 7.6  | 10.3 | 4.66 | 5.3   | 1.54 | 3.42  | 5.99  | 2.89   |
| 93761 | 'Smarca1'   | 15.19 | 16.62 | 7.61 | 23.1 | 9.3  | 7.91  | 10.9 | 15.26 | 7.88  | 20.06  |
| 93762 | 'Smarca5'   | 6.15  | 7.24  | 4.39 | 14.4 | 3.12 | 1.11  | 6.45 | 5.78  | 2.89  | 3.68   |
| 93765 | 'Ube2n'     | 168.2 | 136.4 | 134  | 163  | 124  | 168.6 | 168  | 203.3 | 195.5 | 176.77 |
| 93790 | 'Nipa2'     | 7.93  | 10.41 | 7.84 | 20.4 | 6.17 | 4.25  | 5.74 | 5.56  | 7.63  | 5.06   |
| 93834 | 'Peli2'     | 0.05  | 0.03  | 0    | 2.54 | 0    | 0     | 0.05 | 1.46  | 0     | 0      |
| 93835 | 'Amn'       | 5.07  | 0.34  | 22.1 | 4.09 | 6.92 | 20.77 | 2.79 | 5.13  | 19.69 | 12.81  |
| 93836 | 'Rnf111'    | 7.53  | 1.88  | 5.08 | 3.59 | 2.74 | 1.58  | 9.05 | 1.06  | 5.21  | 2.42   |
| 93837 | 'Dach2'     | 0     | 0     | 0    | 0    | 0    | 2.01  | 0    | 0     | 0     | 0.01   |
| 93838 | 'Dqx1'      | 0.06  | 0     | 0.05 | 0.11 | 0.03 | 0.03  | 0.02 | 0.97  | 0.01  | 0.93   |
| 93840 | 'Vangl2'    | 2.21  | 7.6   | 18.3 | 0.01 | 6.04 | 13.52 | 3.88 | 19.78 | 20.51 | 11.1   |
| 93841 | 'Uchl4'     | 0     | 0.26  | 0.04 | 9.1  | 0    | 2.4   | 0.05 | 0     | 0.94  | 0      |
| 93842 | 'Igsf9'     | 2.47  | 3.31  | 4.87 | 0    | 2.8  | 2.83  | 0.03 | 1.99  | 2.65  | 1.23   |
| 93843 | 'Pnck'      | 672   | 657.3 | 558  | 703  | 496  | 824.1 | 645  | 667.7 | 382.9 | 529.14 |
| 93871 | 'Brwd1'     | 40.49 | 41.36 | 66.5 | 28.1 | 24.7 | 15.62 | 84.1 | 27.26 | 41.28 | 25.11  |
| 93873 | 'Pcdhb2'    | 2.8   | 0     | 0    | 0    | 0    | 0     | 0    | 0     | 0     | 0      |
| 93874 | 'Pcdhb3'    | 1.24  | 2.74  | 2.02 | 0    | 0.47 | 0     | 0.01 | 0.83  | 0     | 0      |
| 93875 | 'Pcdhb4'    | 0     | 0     | 0    | 1.33 | 1.35 | 0     | 0    | 1.13  | 0     | 1.13   |

|       |            |       |       |      |      |      |       |      |       |       |        |
|-------|------------|-------|-------|------|------|------|-------|------|-------|-------|--------|
| 93876 | 'Pcdhb5'   | 0.79  | 4.98  | 5.82 | 0.03 | 1.25 | 0     | 0    | 0.74  | 2.7   | 0      |
| 93877 | 'Pcdhb6'   | 0     | 1.02  | 0    | 0    | 0.02 | 0     | 0    | 0.59  | 0     | 0      |
| 93878 | 'Pcdhb7'   | 5.34  | 2.29  | 3.41 | 6.92 | 0    | 0     | 0.01 | 0     | 5.03  | 10.56  |
| 93879 | 'Pcdhb8'   | 0     | 4.62  | 0    | 0.02 | 0    | 0     | 0    | 1.5   | 0     | 0      |
| 93880 | 'Pcdhb9'   | 20.2  | 3.06  | 20.8 | 14.8 | 33.8 | 0     | 10.9 | 36.25 | 3.64  | 0.76   |
| 93881 | 'Pcdhb10'  | 1.64  | 2.5   | 0    | 0    | 0    | 0     | 0    | 4.35  | 5.31  | 0      |
| 93882 | 'Pcdhb11'  | 0.38  | 0     | 0    | 1.88 | 1.68 | 0     | 0    | 0.25  | 0     | 0      |
| 93883 | 'Pcdhb12'  | 9.64  | 0.94  | 15.5 | 0.02 | 1.74 | 0.36  | 23.3 | 7.29  | 0     | 0      |
| 93884 | 'Pcdhb13'  | 0.63  | 0     | 2.22 | 0    | 0    | 0     | 4.25 | 0.56  | 0.03  | 0      |
| 93885 | 'Pcdhb14'  | 3.48  | 6.24  | 9.2  | 6.36 | 0.57 | 6.98  | 0    | 1.08  | 1.59  | 0.76   |
| 93887 | 'Pcdhb16'  | 0     | 0     | 0.27 | 3.21 | 3.53 | 0.17  | 0    | 0.01  | 0.65  | 0      |
| 93888 | 'Pcdhb17'  | 10.02 | 0     | 2.86 | 2.63 | 0.13 | 1.07  | 4.34 | 12.29 | 9.15  | 2.08   |
| 93889 | 'Pcdhb18'  | 0.33  | 0.25  | 0    | 0    | 0    | 0     | 0    | 0     | 0     | 0      |
| 93890 | 'Pcdhb19'  | 2.75  | 0     | 0.02 | 0    | 0    | 0.01  | 4.98 | 1.12  | 0     | 0.08   |
| 93891 | 'Pcdhb20'  | 2.17  | 0.43  | 0.98 | 0    | 3.4  | 0.04  | 2.74 | 6.8   | 1.71  | 0      |
| 93892 | 'Pcdhb21'  | 0     | 0     | 0    | 0    | 0    | 0     | 0    | 0.04  | 0     | 0      |
| 93893 | 'Pcdhb22'  | 1.24  | 0     | 4.84 | 0    | 0    | 0     | 0    | 0     | 0     | 0      |
| 93896 | 'Glp2r'    | 0     | 0     | 0    | 1.91 | 0    | 0     | 0    | 0     | 0     | 0      |
| 93898 | 'Cers1'    | 18.36 | 45.91 | 39.4 | 45   | 19.8 | 22.52 | 35.5 | 19.71 | 39.19 | 19.54  |
| 93960 | 'Nkd1'     | 0.04  | 0     | 0.01 | 1.74 | 0    | 0.93  | 1.31 | 0.01  | 1.47  | 0      |
| 93961 | 'B3galt5'  | 6.63  | 6.03  | 7.65 | 0    | 4.31 | 5.54  | 3.03 | 4.43  | 11.86 | 7.71   |
| 94040 | 'Clmn'     | 0.63  | 0.82  | 1.28 | 0.01 | 0.14 | 1.24  | 1    | 1.11  | 0.92  | 0.3    |
| 94041 | 'Allc'     | 0     | 5.7   | 0    | 0    | 0.67 | 0     | 0    | 0     | 0     | 0      |
| 94043 | 'Tm2d1'    | 54.97 | 99.09 | 92.7 | 158  | 92.2 | 61.13 | 70.5 | 96.85 | 120.7 | 96.82  |
| 94044 | 'Bcl2l13'  | 1.41  | 5.58  | 4.15 | 0.01 | 6.3  | 0.66  | 2.19 | 6.32  | 6.06  | 1.12   |
| 94045 | 'P2rx5'    | 0     | 0     | 0    | 5.22 | 3.94 | 1.09  | 1.7  | 0     | 0     | 0      |
| 94047 | 'Tmem121b' | 0     | 1.83  | 1.43 | 0    | 1.71 | 0     | 0    | 0.01  | 0     | 0.56   |
| 94061 | 'Mrpl1'    | 10.51 | 12.24 | 11.4 | 14.5 | 10.9 | 3.16  | 10.4 | 15.37 | 14.41 | 15.68  |
| 94062 | 'Mrpl3'    | 32.68 | 30.89 | 47.3 | 26.7 | 29.7 | 49.32 | 32.6 | 48.67 | 13.6  | 14.44  |
| 94063 | 'Mrpl16'   | 38.2  | 27.64 | 32.4 | 22.1 | 35.2 | 32.03 | 22.9 | 22.53 | 31.91 | 20.22  |
| 94064 | 'Mrpl27'   | 217.9 | 130.6 | 158  | 125  | 251  | 293.8 | 230  | 270.8 | 159.1 | 168.83 |
| 94065 | 'Mrpl34'   | 78.45 | 81.31 | 76.2 | 83.9 | 41.4 | 113.2 | 131  | 63.1  | 80.93 | 67.29  |
| 94066 | 'Mrpl36'   | 50.4  | 60.12 | 36.6 | 17.6 | 61.7 | 95.2  | 48.1 | 70.85 | 32.7  | 48.55  |
| 94067 | 'Mrpl43'   | 85.45 | 68.58 | 37.9 | 29.2 | 86.5 | 78.05 | 64.3 | 81.56 | 64.37 | 53.63  |
| 94088 | 'Trim6'    | 0     | 0     | 0    | 0    | 0    | 0     | 0    | 0     | 0     | 1.92   |
| 94089 | 'Trim7'    | 0.02  | 0.09  | 0    | 0    | 0    | 1.15  | 0    | 0.03  | 1.52  | 0.63   |
| 94090 | 'Trim9'    | 22.06 | 13.19 | 20.3 | 16.4 | 6.28 | 7.63  | 15.2 | 6.62  | 16.46 | 12.2   |
| 94091 | 'Trim11'   | 14.14 | 0.93  | 7.32 | 14.2 | 4.7  | 15.94 | 6.24 | 10.58 | 19.5  | 10.7   |
| 94093 | 'Trim33'   | 0.6   | 1.25  | 0.12 | 0.86 | 1.93 | 1.09  | 6.06 | 0.93  | 1.79  | 2.4    |
| 94094 | 'Trim34a'  | 0     | 0.82  | 0    | 0    | 0    | 0     | 0    | 2.95  | 0     | 0.54   |
| 94109 | 'Csmd1'    | 0.23  | 0.98  | 2.79 | 0.29 | 1.44 | 1.45  | 1.82 | 0.44  | 0.39  | 0.78   |
| 94112 | 'Med15'    | 9.86  | 10.99 | 5.69 | 16.3 | 8.75 | 3.39  | 28.9 | 12.22 | 22.92 | 15.11  |
| 94176 | 'Dock2'    | 0     | 0.66  | 0.11 | 0    | 0    | 0     | 0    | 0     | 0     | 0.31   |
| 94178 | 'Mcoln1'   | 62.95 | 25.13 | 93.6 | 40.8 | 37.3 | 43.1  | 79.5 | 26.61 | 82.49 | 20.54  |
| 94180 | 'Acsbg1'   | 39.64 | 36.95 | 28.5 | 44   | 19.2 | 53.03 | 57.8 | 25.38 | 26.11 | 22.19  |
| 94181 | 'Nans'     | 6.41  | 24.86 | 11   | 7.99 | 6.28 | 31.38 | 20.8 | 28.83 | 37.25 | 18.82  |
| 94184 | 'Pdxdc1'   | 27.16 | 31.27 | 35.2 | 8.11 | 28.8 | 24.05 | 35.7 | 31.32 | 34.45 | 21.55  |
| 94185 | 'Tnfrsf21' | 60.57 | 35.82 | 55.6 | 28.4 | 21.8 | 18.65 | 57.9 | 76.3  | 47.54 | 42.24  |
| 94186 | 'Strn3'    | 5.87  | 13.42 | 12.8 | 28.6 | 6.81 | 11.79 | 3.48 | 3.69  | 5.35  | 9.34   |
| 94187 | 'Zfp423'   | 5.29  | 9.68  | 0.07 | 0.72 | 2.18 | 5.24  | 10.1 | 2.79  | 1.85  | 7.43   |
| 94190 | 'Ophn1'    | 3.47  | 8.54  | 9.07 | 2.36 | 11   | 1.72  | 5.15 | 6.53  | 2.33  | 3.97   |
| 94191 | 'Adarb2'   | 19.02 | 2.7   | 4.63 | 0.68 | 0.86 | 1.39  | 3.54 | 0.66  | 1.36  | 1.37   |
| 94212 | 'Pag1'     | 0.05  | 2.28  | 0.07 | 0    | 0.48 | 0.13  | 0.47 | 0.18  | 0.05  | 0.56   |
| 94213 | 'Ddx50'    | 40.96 | 52.7  | 28.9 | 33.6 | 25.3 | 29.85 | 17.9 | 29.95 | 35.07 | 35.65  |
| 94214 | 'Spock2'   | 46.12 | 55.98 | 51.3 | 18.2 | 47.8 | 35.04 | 60.4 | 51.93 | 53.14 | 52.33  |
| 94216 | 'Col4a6'   | 0     | 0.01  | 0    | 0    | 0.49 | 0     | 0    | 0     | 0     | 0.07   |
| 94217 | 'Lrp1b'    | 5.08  | 6.56  | 2.49 | 11.5 | 0.86 | 5.63  | 7.22 | 5.4   | 3.61  | 3.92   |
| 94218 | 'Cnrm3'    | 3.84  | 1.2   | 1.36 | 0.12 | 1.01 | 0.01  | 1.65 | 0.99  | 0.21  | 3.81   |



|       |                 |       |       |      |      |      |       |      |       |       |        |
|-------|-----------------|-------|-------|------|------|------|-------|------|-------|-------|--------|
| 94219 | 'Cnnm2'         | 6.18  | 6.48  | 12.1 | 28.9 | 4.78 | 3.79  | 5.95 | 4.77  | 3.59  | 3.71   |
| 94220 | 'Cnnm4'         | 6.2   | 6.46  | 4.82 | 3.17 | 9.86 | 1.57  | 1.53 | 1.73  | 3.61  | 3.31   |
| 94221 | 'Gopc'          | 2.64  | 1.11  | 3.99 | 11   | 1.73 | 1.44  | 0    | 2.29  | 0.8   | 2.81   |
| 94223 | 'Dgcr8'         | 9.98  | 7.24  | 4.34 | 3.21 | 8.52 | 1.74  | 11.7 | 4.62  | 14.9  | 2.48   |
| 94226 | 'S1pr5'         | 5.6   | 3.47  | 3.91 | 0    | 12.9 | 11.02 | 4.95 | 0.3   | 3.02  | 0.07   |
| 94227 | 'Pi15'          | 0.17  | 0.33  | 0.29 | 0.37 | 0.35 | 0.22  | 0.35 | 0.16  | 0.18  | 0.14   |
| 94229 | 'Slc4a10'       | 7.51  | 7.46  | 23.3 | 16.9 | 7.2  | 5.2   | 19.2 | 9.92  | 23.6  | 16.68  |
| 94230 | 'Cpsf1'         | 8.8   | 12.79 | 22   | 11.7 | 16.1 | 12.76 | 36.7 | 11.77 | 6.57  | 11.87  |
| 94232 | 'Ubqln4'        | 11.19 | 5.28  | 6.27 | 7.49 | 6.28 | 1.8   | 5.49 | 4.32  | 8.77  | 2.81   |
| 94242 | 'Tinagl1'       | 0     | 3.52  | 0    | 0    | 0    | 0     | 0    | 0     | 4.2   | 0      |
| 94245 | 'Dtnbp1'        | 21.13 | 29.87 | 38.4 | 24.4 | 30.1 | 86.23 | 16.7 | 38.48 | 19.4  | 29.48  |
| 94246 | 'Arid4b'        | 23.01 | 20.2  | 16.8 | 32   | 19.7 | 17.83 | 16   | 20.08 | 31.07 | 28.36  |
| 94249 | 'Slc24a3'       | 7.34  | 6.31  | 11.1 | 4.67 | 22.8 | 14.29 | 17.1 | 6.46  | 5.92  | 2.02   |
| 94253 | 'Hecw1'         | 2.52  | 0.8   | 2.41 | 5.81 | 2.47 | 3.39  | 1.32 | 4.23  | 2.28  | 1.24   |
| 94254 | 'Rcc1l'         | 8.23  | 16.43 | 7.8  | 10.4 | 13.7 | 12.02 | 11.2 | 5.07  | 9.83  | 2.76   |
| 94275 | 'Maged1'        | 1211  | 1051  | 893  | 955  | 608  | 553.1 | 835  | 1415  | 912.9 | 942.94 |
| 94279 | 'Sfxn2'         | 1.54  | 1.11  | 0.47 | 0.02 | 1.29 | 1.98  | 1.34 | 0.81  | 0.2   | 0.05   |
| 94280 | 'Sfxn3'         | 32.55 | 23    | 43.4 | 6.57 | 33.9 | 10.18 | 25.1 | 26.69 | 31.2  | 18.57  |
| 94281 | 'Sfxn4'         | 13.51 | 14.53 | 17.6 | 35.8 | 8.09 | 42.07 | 6.45 | 18.93 | 30.28 | 18.56  |
| 94282 | 'Sfxn5'         | 64.76 | 45.46 | 37.8 | 35   | 77.8 | 74.15 | 75.9 | 54.31 | 56.16 | 50.09  |
| 94284 | 'Ugt1a6a'       | 0     | 0     | 0    | 0    | 0    | 0     | 0    | 0.22  | 0     | 2.08   |
| 94315 | 'Prcc'          | 0.64  | 2.44  | 2.93 | 2.11 | 3.91 | 0.38  | 0.15 | 4.47  | 10.47 | 1.37   |
| 94332 | 'Cadm3'         | 56.75 | 43.82 | 64.1 | 16.1 | 49.3 | 20.23 | 62.1 | 77.46 | 173.7 | 57.75  |
| 94346 | 'Tmem40'        | 3.05  | 0     | 2.8  | 0.05 | 0    | 0     | 0    | 0     | 0     | 0      |
| 94352 | 'Loxl2'         | 0.8   | 3.68  | 3.82 | 16.1 | 2.62 | 2.2   | 0.77 | 0.92  | 1.15  | 2.99   |
| 94353 | 'Hmgn3'         | 75.05 | 90.61 | 49.5 | 122  | 112  | 85.23 | 60.7 | 82.03 | 61.08 | 80.9   |
| 96875 | 'Prg4'          | 0     | 0     | 0    | 0.03 | 0    | 0.05  | 0.7  | 0     | 0.14  | 0      |
| 96935 | 'Susd4'         | 96.5  | 108.1 | 155  | 55.2 | 52.4 | 99.83 | 71.6 | 117.3 | 100.3 | 131.14 |
| 96957 | 'Tmem62'        | 9.89  | 11.39 | 9.15 | 19.3 | 10.5 | 10.97 | 3.19 | 10.44 | 32.45 | 8.7    |
| 96979 | 'Ptges2'        | 15.16 | 0.15  | 13.7 | 3.42 | 12.8 | 9.59  | 18.3 | 23.55 | 9.14  | 15.12  |
| 97031 | 'Tprn'          | 9.3   | 5.86  | 4.88 | 1.79 | 5.19 | 10.5  | 20.4 | 0.03  | 0     | 0      |
| 97064 | 'Wwtr1'         | 0.01  | 0.32  | 0.06 | 0.07 | 0.18 | 0.01  | 0    | 0     | 0     | 1.76   |
| 97086 | 'Slc9b2'        | 4.06  | 5.19  | 0.72 | 2.65 | 1.6  | 0     | 0    | 4.67  | 2.57  | 2.06   |
| 97112 | 'Nmd3'          | 23.17 | 18.69 | 33.8 | 52.5 | 20   | 51.78 | 13.7 | 33.65 | 32.39 | 36.16  |
| 97114 | 'Hist2h3c2'     | 0     | 0     | 1.06 | 0    | 1.82 | 0.15  | 0.25 | 1.24  | 0     | 0      |
| 97122 | 'Hist2h4'       | 2.04  | 8.41  | 4.11 | 0    | 3.56 | 5.81  | 8.02 | 4.29  | 5.31  | 0      |
| 97130 | 'C77080'        | 0.01  | 1.63  | 0.84 | 0.7  | 0.02 | 0.01  | 3.49 | 1.76  | 0     | 2.71   |
| 97159 | 'A430005L14Rik' | 15.75 | 51.06 | 32.4 | 29.1 | 31.3 | 77.58 | 46.5 | 60.26 | 50.73 | 42.73  |
| 97165 | 'Hmgb2'         | 0.89  | 22.91 | 12.7 | 32   | 8.69 | 7.53  | 10   | 6.56  | 3.25  | 0.37   |
| 97212 | 'Hadha'         | 12.53 | 21.11 | 15.1 | 10.6 | 8.38 | 14.8  | 21.3 | 11.1  | 12.71 | 16.16  |
| 97287 | 'Mtmr14'        | 12.69 | 14.34 | 9.39 | 9    | 7.02 | 0.02  | 5.68 | 10.21 | 15.28 | 7.01   |
| 97387 | 'Strn4'         | 7.55  | 6.68  | 5.12 | 18.9 | 5.69 | 5.08  | 28.6 | 6.54  | 8.52  | 5.74   |
| 97440 | 'B3gnt9'        | 0     | 1.73  | 4.48 | 0    | 1.81 | 0.76  | 3.52 | 0     | 3.15  | 6.12   |
| 97484 | 'Cog8'          | 22.59 | 18.47 | 14.6 | 27.5 | 16.8 | 22.17 | 13.1 | 25.41 | 11.35 | 28.41  |
| 97487 | 'Cmtm4'         | 2.89  | 2.19  | 2.99 | 0.38 | 1.66 | 4.05  | 3.98 | 0.42  | 2.18  | 1.16   |
| 97541 | 'Qars'          | 5.36  | 7.93  | 20.2 | 23.8 | 11.6 | 16.16 | 6.11 | 15.73 | 29.88 | 25.29  |
| 97761 | 'Sgsm2'         | 10.12 | 9.22  | 8.03 | 10.2 | 7.13 | 2.05  | 2.32 | 5.78  | 1.77  | 5.86   |
| 97820 | '4833439L19Rik' | 151.1 | 114.1 | 102  | 138  | 96.8 | 109.4 | 157  | 160.6 | 126.1 | 109.54 |
| 97827 | 'Exd2'          | 13.04 | 14.15 | 12.7 | 15.2 | 12.7 | 12.64 | 17.7 | 7.35  | 18.34 | 13.85  |
| 97848 | 'Serpib6c'      | 0     | 0     | 0    | 0    | 0    | 0     | 2.35 | 0     | 0     | 0      |
| 97863 | 'Fam8a1'        | 9.16  | 6.29  | 3.38 | 14.2 | 4.91 | 4     | 9.35 | 2.79  | 4.49  | 1.16   |
| 97884 | 'B3galnt2'      | 3.26  | 1.23  | 0.82 | 0.48 | 5.58 | 4     | 1.66 | 4.07  | 1.03  | 0      |
| 97895 | 'Nlrp4f'        | 0.01  | 0.11  | 0.15 | 0    | 0.04 | 0.06  | 0.13 | 0.07  | 0     | 0      |
| 97908 | 'Hist1h3g'      | 1.5   | 0     | 0.89 | 0    | 0    | 0     | 0    | 1.74  | 3.15  | 0      |
| 97961 | 'Nol12'         | 20.69 | 25.08 | 21.6 | 39.5 | 27.2 | 33.24 | 25.8 | 26.65 | 14.03 | 41.61  |
| 97998 | 'Deptor'        | 0.86  | 15.93 | 0.02 | 6.02 | 3.02 | 3.29  | 0.04 | 1.11  | 5.44  | 10.15  |
| 98053 | 'Gtf2f1'        | 54.14 | 38.61 | 44.3 | 11.4 | 53.9 | 60.83 | 59.4 | 40.66 | 44.32 | 33.73  |
| 98170 | 'Tmem132a'      | 16.23 | 24.13 | 31.4 | 0    | 23.1 | 19.98 | 34.7 | 15.41 | 33.31 | 18.59  |

|       |                 |       |       |      |      |      |       |      |       |       |        |
|-------|-----------------|-------|-------|------|------|------|-------|------|-------|-------|--------|
| 98193 | 'Dcaf8'         | 61.09 | 53.61 | 54.8 | 33   | 48.4 | 36.66 | 35.7 | 50.74 | 32.03 | 54.62  |
| 98221 | 'Eif3m'         | 115.2 | 112.6 | 131  | 79.7 | 113  | 184.1 | 102  | 108.4 | 106.1 | 119.1  |
| 98238 | 'Lrrc59'        | 6.75  | 11.59 | 10.7 | 15   | 10   | 8.77  | 9.69 | 11.07 | 12.15 | 4.92   |
| 98258 | 'Txndc9'        | 49.99 | 39.38 | 24.1 | 55.9 | 36.5 | 42.8  | 45.4 | 48.47 | 39.64 | 52.09  |
| 98267 | 'Stk17b'        | 0     | 1.2   | 0    | 0    | 0    | 0     | 1.09 | 2.17  | 0     | 0.76   |
| 98303 | 'D630023F18Rik' | 7.12  | 26.62 | 7.69 | 13.2 | 2.95 | 9.96  | 16   | 13.96 | 9.67  | 13.33  |
| 98314 | 'D2hgdh'        | 10.7  | 11.33 | 2.82 | 3.8  | 0    | 9.28  | 4.71 | 4.23  | 5.83  | 6.47   |
| 98363 | 'Efhd1'         | 5.85  | 1.2   | 5.02 | 0    | 0.89 | 16.06 | 0    | 2.04  | 0     | 0      |
| 98365 | 'Slamf9'        | 0     | 1.98  | 0.04 | 0    | 11.9 | 3.54  | 0    | 0     | 0     | 0      |
| 98366 | 'Smap1'         | 15.32 | 2.8   | 2.86 | 11.3 | 14.5 | 13.11 | 5.41 | 5.54  | 8.39  | 14.45  |
| 98376 | 'Gorab'         | 5.01  | 7.14  | 14.6 | 9.87 | 1.52 | 0.21  | 4.11 | 3.85  | 12.24 | 8.43   |
| 98386 | 'Lbr'           | 0.21  | 7.57  | 2.8  | 0    | 3.93 | 2.77  | 3.42 | 5.89  | 6.59  | 6.39   |
| 98388 | 'Chst10'        | 22.21 | 4.73  | 13.9 | 17.8 | 4.63 | 0.58  | 6.84 | 16    | 25.53 | 2.88   |
| 98396 | 'Slc41a1'       | 4.84  | 2     | 11.6 | 2.35 | 6.83 | 0     | 5.26 | 3.48  | 4     | 5.84   |
| 98402 | 'Sh3bp4'        | 1.36  | 0.04  | 6.29 | 8    | 3.66 | 0.02  | 12.3 | 1.59  | 0.97  | 0      |
| 98403 | 'Zfp451'        | 9.91  | 1.8   | 6.1  | 27.9 | 25.7 | 5.94  | 8    | 14.62 | 11.59 | 14.19  |
| 98404 | 'Al597479'      | 15.42 | 11.78 | 11.4 | 5.77 | 27   | 5.82  | 33.7 | 15.14 | 16.62 | 28.15  |
| 98415 | 'Nucks1'        | 5.83  | 7.13  | 8.33 | 12.2 | 8.15 | 3.72  | 7.43 | 6.39  | 4.15  | 5.47   |
| 98417 | 'Cnih4'         | 4.56  | 13.64 | 9.02 | 8.23 | 22.2 | 2.98  | 2.24 | 8.92  | 7.6   | 8.3    |
| 98432 | 'Phlpp1'        | 1.04  | 2.64  | 0.67 | 5.75 | 1.7  | 0.01  | 0.17 | 1.03  | 1.56  | 0.88   |
| 98488 | 'Gtf3c3'        | 11.41 | 5.58  | 13.7 | 7.63 | 6.88 | 11.32 | 5.25 | 10.12 | 18.89 | 6.24   |
| 98496 | 'Pid1'          | 30.94 | 16.41 | 28.1 | 4.68 | 16.4 | 11.42 | 39.4 | 35.85 | 36.77 | 45.62  |
| 98558 | 'Mael'          | 0     | 0     | 0    | 0    | 0.03 | 0     | 0    | 0     | 0     | 0      |
| 98660 | 'Atp1a2'        | 20.84 | 28.8  | 15.1 | 25.8 | 15.5 | 20.71 | 18.1 | 20.83 | 23.97 | 12.02  |
| 98682 | 'Mfsd6'         | 8.46  | 4.34  | 3.02 | 13.1 | 11.5 | 6.51  | 10.9 | 2.92  | 10.08 | 2.56   |
| 98685 | 'Trmt1l'        | 22.81 | 22.35 | 14.6 | 14.3 | 9.39 | 7.72  | 21.4 | 13.99 | 10.11 | 13.59  |
| 98710 | 'Rabif'         | 28.54 | 37.12 | 46   | 20.9 | 23.5 | 44.1  | 33.6 | 37.82 | 52.66 | 27.83  |
| 98711 | 'Rdh10'         | 0.08  | 3.32  | 3.62 | 1.19 | 3.23 | 0     | 0    | 1.18  | 0     | 0.11   |
| 98732 | 'Rab3gap2'      | 5.65  | 8.29  | 17.2 | 12.2 | 12   | 6.18  | 17.2 | 6.12  | 15.46 | 6.36   |
| 98733 | 'Obsl1'         | 2.16  | 4.65  | 1.97 | 0.62 | 5.75 | 2.71  | 8.24 | 1.45  | 5.02  | 1.67   |
| 98741 | 'Kcnb2'         | 1.93  | 2.18  | 2.46 | 7.25 | 1.54 | 0.01  | 2.98 | 0.87  | 0.73  | 5.05   |
| 98758 | 'Hnrnpf'        | 48.82 | 34.3  | 26.9 | 16.4 | 25.1 | 45.75 | 47.6 | 37.17 | 35.19 | 38.33  |
| 98766 | 'Ubac1'         | 15.12 | 17.58 | 7.7  | 16.1 | 13.7 | 36    | 1.06 | 11.42 | 27.9  | 9.87   |
| 98828 | 'Cdc123'        | 100.1 | 139.7 | 165  | 200  | 175  | 310.9 | 96.6 | 190.7 | 139.8 | 176.49 |
| 98845 | 'Eps8l2'        | 0     | 0.14  | 0    | 0    | 8.79 | 5.26  | 0    | 0     | 4.25  | 9.2    |
| 98870 | 'Al182371'      | 0     | 0     | 0    | 0    | 0    | 0     | 0    | 0     | 0     | 0.06   |
| 98878 | 'Ehd4'          | 16.45 | 14.24 | 12.3 | 16.2 | 14.9 | 27.83 | 9.61 | 3.38  | 18.34 | 7.04   |
| 98910 | 'Usp6nl'        | 1.27  | 0.31  | 0.59 | 2.11 | 0.37 | 0.08  | 0.14 | 0.71  | 1.21  | 0.83   |
| 98932 | 'Myl9'          | 0     | 3.66  | 5.13 | 0    | 6.65 | 10.91 | 0    | 4.55  | 7.33  | 2.24   |
| 98952 | 'Fam102a'       | 3.77  | 3.9   | 2.82 | 8.35 | 1.68 | 3.62  | 8.99 | 9.19  | 2.26  | 2.04   |
| 98956 | 'Nat10'         | 2.13  | 1.55  | 10.4 | 0    | 3.12 | 3.39  | 9.69 | 1.82  | 8.72  | 6.94   |
| 98970 | 'Fibcd1'        | 0.42  | 1.56  | 1.85 | 1.51 | 0.37 | 11.32 | 0.01 | 0.35  | 4.58  | 5.78   |
| 98985 | 'Clp1'          | 2.85  | 14.72 | 10.9 | 33.1 | 4.14 | 3.39  | 0    | 1.36  | 4.52  | 3.44   |
| 98999 | 'Znfx1'         | 0.43  | 0.18  | 0    | 10.1 | 0.34 | 4.52  | 0    | 0.57  | 0.55  | 2.92   |
| 99003 | 'Qser1'         | 0.91  | 0     | 0.01 | 0    | 0.16 | 0.51  | 0    | 0.29  | 1.85  | 0.04   |
| 99010 | 'Lpcat4'        | 18.92 | 9.88  | 18.8 | 17.6 | 12.8 | 3.32  | 3.06 | 5.05  | 23.78 | 15.76  |
| 99011 | 'Pomt1'         | 4.36  | 13.25 | 5.72 | 12.5 | 5.8  | 10.81 | 14.1 | 9.07  | 9.29  | 13.53  |
| 99031 | 'Osbp16'        | 17.76 | 11.25 | 11   | 10.2 | 13.9 | 8.28  | 9.52 | 11.3  | 19.02 | 8.82   |
| 99035 | 'Olah'          | 0     | 0     | 0    | 0    | 1.82 | 0     | 0    | 0     | 3.11  | 0      |
| 99045 | 'Mrps26'        | 155   | 125.1 | 147  | 81.9 | 174  | 126.1 | 161  | 187.6 | 88.26 | 102.34 |
| 99100 | 'Cep152'        | 0     | 1.3   | 0    | 0.35 | 1.52 | 2.13  | 0.9  | 0.81  | 0.22  | 0.01   |
| 99138 | 'Stard7'        | 31.11 | 32.19 | 19.3 | 34   | 25.9 | 32.34 | 47.8 | 39.73 | 44.42 | 24.48  |
| 99151 | 'Cercam'        | 3.33  | 2.11  | 4.21 | 9.11 | 9.32 | 11.81 | 7.98 | 5.02  | 0.25  | 3.24   |
| 99152 | 'Anapc2'        | 54.33 | 55.54 | 67.1 | 45.5 | 64.2 | 36.43 | 85.2 | 42.22 | 93.35 | 44.31  |
| 99167 | 'Ssx2ip'        | 8.49  | 8.04  | 7.96 | 4.26 | 9.97 | 8.62  | 5.09 | 13.35 | 4.57  | 10.1   |
| 99237 | 'Tm9sf4'        | 27.71 | 47.37 | 48.8 | 13.4 | 29.6 | 27.87 | 57.7 | 48.17 | 40.24 | 57.05  |
| 99296 | 'Hrh3'          | 9.91  | 4.43  | 15.8 | 8.58 | 21.6 | 12.38 | 4.92 | 10.14 | 4.26  | 2.95   |
| 99311 | 'Commd7'        | 34.93 | 44.04 | 41.9 | 48   | 31.9 | 62.12 | 25   | 36.63 | 55.91 | 55.93  |

|       |                 |       |       |      |      |      |       |      |       |       |        |
|-------|-----------------|-------|-------|------|------|------|-------|------|-------|-------|--------|
| 99326 | 'Garnl3'        | 16.18 | 11.47 | 22.1 | 26.8 | 15.4 | 5.9   | 44.6 | 21.67 | 17.4  | 8.09   |
| 99334 | 'Zscan29'       | 0.11  | 0.08  | 2.11 | 0    | 2.66 | 2.62  | 0    | 0.22  | 0.5   | 4.02   |
| 99349 | 'Dnajc24'       | 13.71 | 12.28 | 13.8 | 27.7 | 9.26 | 6.54  | 7.7  | 14.45 | 2.39  | 7.01   |
| 99371 | 'Arfgef2'       | 0.26  | 0.01  | 2.05 | 1.7  | 1.57 | 0.03  | 4.75 | 1.09  | 1.38  | 2.11   |
| 99375 | 'Cul4a'         | 15.07 | 14.03 | 15.3 | 20.6 | 26.3 | 8.22  | 16.7 | 17.38 | 13.22 | 12.7   |
| 99377 | 'Sall4'         | 0     | 0     | 0    | 0    | 0    | 0     | 0.02 | 0     | 0     | 0      |
| 99382 | 'Abtb2'         | 2.97  | 1.19  | 3.95 | 3.34 | 0.01 | 0     | 0    | 0.01  | 0.01  | 0      |
| 99412 | 'Golga2'        | 7.29  | 12.41 | 7.06 | 11.6 | 15.3 | 4.9   | 17.1 | 9.96  | 8.03  | 16.41  |
| 99439 | 'Duox1'         | 0.01  | 0     | 0    | 0    | 0    | 0     | 0    | 0     | 0     | 0      |
| 99470 | 'Magi3'         | 3.8   | 1.49  | 1.03 | 1.03 | 2.9  | 0.01  | 1.12 | 2.61  | 0.01  | 0.9    |
| 99480 | 'Dnttip2'       | 26.84 | 27.46 | 18.2 | 28.4 | 29.5 | 17.96 | 35   | 28.4  | 18.79 | 27.24  |
| 99512 | 'Wdr47'         | 31.25 | 25    | 38.1 | 26.3 | 16.3 | 11.58 | 43.7 | 35.1  | 51.71 | 29.73  |
| 99526 | 'Usp53'         | 2.16  | 1.69  | 2.78 | 0    | 1.79 | 1.21  | 0.6  | 0.77  | 2.79  | 0.31   |
| 99543 | 'Olfml3'        | 3.63  | 2.56  | 4.24 | 0.03 | 6.05 | 48.19 | 22.5 | 6.3   | 0.27  | 0      |
| 99586 | 'Dpyd'          | 1.93  | 2.92  | 2.2  | 10.5 | 0.85 | 4.54  | 1.71 | 4.59  | 4.05  | 4.76   |
| 99633 | 'Adgrl2'        | 5.14  | 19.55 | 13.6 | 3.34 | 10   | 2.27  | 3.49 | 6.25  | 1.57  | 10.14  |
| 99650 | '4933434E20Rik' | 91.31 | 77.9  | 43.5 | 100  | 114  | 93.04 | 67.4 | 95.91 | 101.7 | 108.34 |
| 99662 | 'Eps8l3'        | 1.63  | 1.64  | 3.12 | 1.6  | 2.77 | 1.78  | 4.29 | 1.46  | 2.25  | 0.11   |
| 99663 | 'Clca4a'        | 0     | 0.11  | 0    | 0    | 0    | 0     | 0    | 0     | 0     | 0      |
| 99681 | 'Tchh'          | 0.63  | 4.42  | 2.48 | 0    | 0.8  | 3.42  | 3.45 | 1.52  | 1.51  | 0.94   |
| 99683 | 'Sec24b'        | 3.44  | 6.96  | 6.3  | 13.4 | 3.01 | 9.03  | 4.45 | 4.86  | 9.99  | 10.38  |
| 99696 | 'Ankrd50'       | 1.73  | 1.35  | 1.2  | 2.08 | 1.13 | 1.18  | 1.3  | 1.13  | 0.74  | 2.28   |
| 99712 | 'Cept1'         | 54.5  | 65.83 | 34.9 | 9.17 | 35.2 | 60.48 | 31.1 | 48.86 | 50.9  | 82.11  |
| 99730 | 'Taf13'         | 11.18 | 21.48 | 9.63 | 37.3 | 38.3 | 51.07 | 11.9 | 21.28 | 28.08 | 16.7   |
| 99738 | 'Kcnc4'         | 20.45 | 2.66  | 12.3 | 0.02 | 4.42 | 13.56 | 16.7 | 11.04 | 19.4  | 1.76   |
| 99887 | 'Tmem56'        | 2.74  | 2.72  | 1.34 | 4.59 | 1.6  | 3.54  | 2.72 | 1.65  | 1.11  | 1.75   |
| 99889 | 'Arfip1'        | 7.98  | 8.05  | 4.39 | 3.14 | 12   | 4.51  | 5.57 | 3.43  | 6.38  | 4.27   |
| 99890 | 'Prmt6'         | 1.12  | 5.95  | 0.7  | 3.55 | 0.44 | 0     | 0    | 0     | 5.41  | 4.09   |
| 99929 | 'Tiparp'        | 7.87  | 21.87 | 3.51 | 49   | 1.35 | 4.06  | 5.84 | 7.51  | 6.24  | 19.53  |
| 99982 | 'Kdm1a'         | 1.54  | 6.8   | 4.79 | 4.62 | 2.36 | 23.65 | 2.69 | 4.5   | 6.07  | 2.81   |

**Supplementary Table 2** Differentially expressed genes (in FPKM) and their test statistical P value of ARC and PVH-projecting apMPOA neurons from RNA-seq analysis. Values from each biological replicate are all included. ARC-projecting apMPOA replicates: A5, A6, A8, A10, A12; PVH-projecting apMPOA replicates: P11, P12, P15, P16, P17

| Gene ID   | Gene Symbol     | A_10 | A_12  | A_5   | A_6  | A_8  | P_11  | P_12 | P_15 | P_16 | P_17 | Pvalue(P/A) |
|-----------|-----------------|------|-------|-------|------|------|-------|------|------|------|------|-------------|
| 100040048 | 'Ccl27b'        | 0    | 0     | 0     | 5.43 | 0    | 12.44 | 0    | 2.3  | 7.92 | 13.7 | 0.0894044   |
| 100041546 | 'Ly6c2'         | 0    | 0     | 0     | 0    | 0    | 0     | 0    | 0    | 5.51 | 0    | 1.04E-11    |
| 100042514 | 'Sprr2a3'       | 0    | 0     | 0     | 0    | 0    | 0     | 0    | 0    | 6    | 0    | 6.97E-12    |
| 100042784 | 'Prdm11'        | 0    | 0     | 1.94  | 0    | 0    | 0     | 0    | 0    | 0    | 0    | 2.44E-12    |
| 100043757 | 'Zfp831'        | 0.38 | 0     | 2.37  | 0    | 0    | 0     | 0    | 0.01 | 0.01 | 0    | 0.0040358   |
| 100043861 | 'Klrb1'         | 0    | 2.95  | 0     | 0    | 0    | 0     | 0    | 0    | 0    | 0    | 0.0359111   |
| 100045778 | 'Rnf223'        | 0    | 0     | 1.14  | 0    | 0    | 0     | 0    | 0    | 0    | 0    | 6.10E-13    |
| 100503545 | 'Nuggc'         | 0    | 0     | 0     | 0    | 0    | 0     | 4.8  | 0    | 0    | 0    | 1.55E-12    |
| 100504180 | 'LOC100504180'  | 0    | 0     | 0     | 0    | 0    | 0.78  | 0    | 0    | 0    | 0    | 1.53E-11    |
| 100504234 | 'Ccdc170'       | 0    | 0     | 0     | 0    | 1.68 | 0     | 0    | 0    | 0    | 0    | 8.01E-13    |
| 100861647 | 'Gm21104'       | 0    | 0     | 0     | 0    | 0    | 0     | 0    | 0    | 9.99 | 0    | 4.28E-12    |
| 101056205 | 'Gm29797'       | 0    | 0     | 0     | 0    | 0    | 2.26  | 0    | 0    | 0    | 0    | 8.86E-13    |
| 102638268 | '1700014D04Rik' | 0    | 0     | 0     | 0    | 0    | 0     | 0    | 0    | 0    | 1.68 | 1.64E-12    |
| 102640920 | 'Pvrig'         | 0    | 0     | 0     | 0    | 0    | 0     | 0    | 0    | 2.23 | 0    | 1.14E-11    |
| 104443    | 'Npffr2'        | 0    | 0     | 0     | 0    | 0    | 0     | 0    | 2.1  | 0    | 0    | 1.05E-11    |
| 104709    | 'Pik3r6'        | 0    | 0     | 0     | 0    | 1.59 | 0     | 0    | 0    | 0    | 0    | 5.76E-13    |
| 104759    | 'Pld4'          | 0    | 0     | 0     | 0    | 0.05 | 13.97 | 12.9 | 0    | 5.17 | 0    | 2.14E-05    |
| 105243944 | 'Gm39653'       | 0    | 0     | 0     | 0    | 0    | 0     | 0    | 3.56 | 0    | 0    | 5.63E-12    |
| 105247125 | '105247125'     | 0    | 0     | 0     | 0    | 0    | 0     | 1.54 | 0    | 0    | 0    | 2.42E-12    |
| 105732    | 'Fam83h'        | 0    | 0     | 0     | 0    | 1.04 | 0     | 0    | 0    | 0    | 0    | 7.72E-13    |
| 105855    | 'Nckap1l'       | 0    | 0     | 0     | 0    | 1.33 | 0     | 0    | 0    | 0    | 0    | 2.80E-13    |
| 106757    | 'Catsperd'      | 0    | 0     | 0     | 0    | 0    | 2.61  | 5.09 | 1.64 | 0.1  | 0.37 | 6.13E-07    |
| 107321    | 'Lpxn'          | 0    | 0     | 0     | 0    | 0    | 12.78 | 4.83 | 0    | 0    | 0    | 1.13E-14    |
| 107527    | 'Il1rl2'        | 0    | 0     | 0     | 0    | 0    | 2.04  | 0    | 0    | 0    | 0    | 8.90E-12    |
| 107751    | 'Prrxl1'        | 0    | 0     | 2.09  | 0    | 0    | 0     | 0    | 0    | 0    | 0    | 3.98E-13    |
| 107995    | 'Cdc20'         | 0.02 | 0     | 0     | 0    | 3.97 | 0     | 0    | 0    | 0    | 0    | 2.00E-13    |
| 108012    | 'Ap1s2'         | 13.1 | 46.54 | 38.42 | 48   | 78   | 77.77 | 168  | 115  | 115  | 183  | 5.04E-05    |
| 108043    | 'Chrb3'         | 1.29 | 0     | 0     | 0    | 0    | 0     | 0    | 0    | 0    | 0    | 3.85E-13    |
| 108167560 | 'Gm46058'       | 0    | 0     | 2.8   | 2.83 | 0    | 0     | 0    | 0    | 0    | 0    | 0.0117877   |
| 108168756 | 'Gm46741'       | 0    | 0     | 0     | 0.02 | 0    | 0     | 11.9 | 0    | 0.02 | 0    | 0.0022382   |
| 108802    | 'Calr4'         | 2.24 | 0     | 0     | 0    | 0    | 0     | 0    | 0    | 0    | 0    | 7.80E-13    |
| 108897    | 'Aif1l'         | 1.08 | 0.98  | 3.66  | 0    | 0    | 0     | 0    | 0    | 0    | 0    | 0.0024934   |
| 108912    | 'Cdca2'         | 0    | 0     | 0     | 0    | 0    | 0     | 0    | 1.26 | 0    | 0    | 9.75E-12    |
| 108995    | 'Tbc1d10c'      | 0    | 0     | 0     | 5.73 | 0    | 0     | 0    | 0    | 6.26 | 0    | 0.9538081   |
| 110454    | 'Ly6a'          | 0    | 0     | 0     | 0    | 0    | 5.54  | 0    | 0    | 0    | 0    | 4.44E-12    |
| 114230    | 'Aipl1'         | 0    | 0     | 0     | 0    | 0    | 0     | 0    | 0    | 0    | 2.06 | 1.87E-11    |
| 114249    | 'Npnt'          | 0    | 0     | 0.01  | 0    | 0    | 0     | 2.74 | 0.01 | 6.95 | 0.92 | 4.34E-06    |
| 11471     | 'Actl7b'        | 0    | 3.43  | 0     | 0    | 0    | 0     | 0    | 0    | 0    | 0    | 7.63E-13    |
| 11541     | 'Adora2b'       | 0    | 2.17  | 0     | 0    | 0    | 0     | 0    | 0    | 0    | 0    | 1.40E-12    |
| 11552     | 'Adra2b'        | 0    | 0     | 0     | 0    | 0    | 0     | 0    | 0    | 2.12 | 0    | 6.84E-11    |
| 11576     | 'Afp'           | 0    | 0     | 0     | 0    | 0    | 2.54  | 0    | 0    | 0    | 0    | 3.86E-12    |
| 11609     | 'Agtr2'         | 0    | 0     | 5.05  | 0    | 0    | 0     | 0    | 0    | 0    | 0    | 1.85E-14    |
| 11614     | 'Nr0b1'         | 0    | 0     | 0     | 0    | 0    | 0     | 0    | 0    | 0    | 3.1  | 3.81E-12    |
| 11630     | 'Crybg1'        | 0    | 0     | 0     | 0    | 0    | 0     | 1.28 | 0    | 0    | 0    | 6.29E-13    |
| 11658     | 'Alcam'         | 43.9 | 35.14 | 24.96 | 7.53 | 38   | 50.39 | 131  | 43.3 | 148  | 159  | 4.62E-05    |
| 116872    | 'Serpinb7'      | 0    | 0     | 0     | 0    | 0    | 0     | 0    | 1.83 | 0    | 0    | 1.71E-11    |
| 11810     | 'Apobec1'       | 0    | 0     | 0     | 0    | 0    | 0     | 0    | 2.63 | 3.76 | 7.61 | 2.35E-04    |
| 11830     | 'Aqp5'          | 0    | 0     | 2.41  | 0.04 | 0    | 0     | 0    | 0    | 0    | 0    | 0.0326133   |
| 118453    | 'Mmp28'         | 0    | 0     | 0     | 0    | 1.13 | 0     | 0    | 0    | 0    | 0    | 1.41E-12    |
| 11997     | 'Akr1b7'        | 0    | 0     | 4.21  | 0    | 0    | 0     | 0    | 0    | 0    | 0    | 6.72E-13    |
| 12029     | 'Bcl6b'         | 0    | 0     | 2.63  | 0    | 0    | 0     | 0    | 0    | 0    | 0    | 9.56E-14    |
| 12062     | 'Bdkrb2'        | 0    | 0     | 0     | 0    | 0    | 0     | 0    | 0    | 0    | 1.46 | 3.91E-12    |
| 12142     | 'Prdm1'         | 0    | 0     | 1.49  | 0    | 0    | 0     | 0    | 0    | 0    | 0    | 1.60E-13    |
| 12145     | 'Cxcr5'         | 0    | 0     | 0     | 0    | 0    | 0     | 0    | 0    | 3.74 | 0    | 2.11E-11    |

|        |           |      |       |       |      |      |       |      |      |      |      |           |
|--------|-----------|------|-------|-------|------|------|-------|------|------|------|------|-----------|
| 12159  | 'Bmp4'    | 0    | 0     | 8.41  | 0    | 0    | 0     | 0    | 0    | 0    | 0    | 7.94E-14  |
| 12164  | 'Bmp8b'   | 0    | 0     | 0     | 0    | 0    | 0     | 0    | 0    | 1.99 | 2.5  | 2.10E-13  |
| 12268  | 'C4b'     | 0    | 0     | 3.43  | 5.43 | 24.3 | 0     | 0.01 | 0    | 0.01 | 0.01 | 5.11E-06  |
| 12310  | 'Calca'   | 0    | 0     | 0     | 0    | 0    | 20.55 | 0    | 0    | 0    | 11.3 | 9.47E-15  |
| 12316  | 'Aspm'    | 0    | 0     | 0     | 0.02 | 0    | 0     | 1.78 | 0    | 0    | 0    | 0.0268953 |
| 12490  | 'Cd34'    | 0    | 0     | 0     | 75.8 | 0    | 4.04  | 4.97 | 2.73 | 0    | 0    | 0.3663714 |
| 12493  | 'Cd37'    | 0    | 0     | 0     | 0    | 0    | 25.75 | 0    | 0    | 0    | 4.31 | 4.07E-15  |
| 12508  | 'Cd53'    | 0    | 0     | 0.05  | 0    | 0    | 10.14 | 3.49 | 0.55 | 0    | 2.53 | 9.08E-06  |
| 12532  | 'Cdc25c'  | 0    | 0     | 0     | 0    | 0    | 5.2   | 0.03 | 0    | 0    | 0    | 4.36E-13  |
| 12566  | 'Cdk2'    | 0    | 0     | 0     | 0    | 0    | 0     | 4.69 | 0    | 0    | 0    | 4.43E-13  |
| 12609  | 'Cebpd'   | 0.65 | 1.56  | 1.47  | 8.72 | 1.09 | 0     | 0    | 0    | 0    | 0    | 5.42E-09  |
| 12677  | 'Vsx2'    | 0    | 0     | 0     | 0    | 2.71 | 0     | 0    | 0    | 0    | 0    | 1.01E-13  |
| 12767  | 'Cxcr4'   | 0    | 0     | 0     | 0    | 2.41 | 0     | 0    | 0    | 0    | 0    | 1.21E-12  |
| 12922  | 'Crhr2'   | 96   | 120.6 | 86.78 | 50   | 0    | 0     | 0    | 0    | 0    | 0    | 6.53E-15  |
| 12931  | 'Crif1'   | 0    | 0     | 3.05  | 0    | 0    | 0     | 0    | 0    | 0    | 0    | 7.15E-13  |
| 12959  | 'Cryba4'  | 0    | 0     | 4.2   | 0    | 0    | 0     | 0    | 0    | 0    | 0    | 0.0391199 |
| 13013  | 'Cst9'    | 0    | 0     | 0     | 0    | 0    | 0     | 15.4 | 0    | 0    | 0    | 1.96E-11  |
| 13089  | 'Cyp2b13' | 0    | 0     | 0     | 0    | 4.31 | 0     | 0    | 0    | 0    | 0    | 2.45E-13  |
| 13179  | 'Dcn'     | 0    | 0     | 0     | 0    | 3.04 | 0     | 0    | 0    | 0    | 0    | 4.11E-13  |
| 13195  | 'Ddc'     | 118  | 81.17 | 29.82 | 94.9 | 31.2 | 12.03 | 4.26 | 12.8 | 16.3 | 7.03 | 8.78E-09  |
| 13214  | 'Defb1'   | 0    | 0     | 0     | 0    | 0    | 0     | 35.1 | 0    | 0    | 0    | 4.08E-14  |
| 13490  | 'Drd3'    | 36.3 | 0     | 64.02 | 0    | 40.5 | 190.2 | 0    | 114  | 154  | 267  | 4.93E-09  |
| 13605  | 'Ect2'    | 0    | 0     | 0     | 0    | 0    | 0     | 0    | 1.46 | 0    | 0    | 2.84E-12  |
| 13608  | 'Edar'    | 2.35 | 0     | 0     | 1.22 | 0    | 0     | 0    | 0    | 0    | 0    | 2.55E-14  |
| 13639  | 'Efna4'   | 0    | 0     | 1.92  | 0    | 0    | 0     | 0    | 0    | 0    | 0    | 0.042011  |
| 13797  | 'Emx2'    | 0    | 0     | 0     | 0    | 0    | 3.04  | 0    | 0    | 11.9 | 3.61 | 3.37E-05  |
| 13806  | 'Eno1'    | 1030 | 928.3 | 999.8 | 851  | 876  | 1503  | 1320 | 1291 | 1390 | 1216 | 5.20E-07  |
| 13846  | 'Ephb4'   | 0    | 0     | 0     | 1.51 | 0    | 0     | 0    | 0    | 1.5  | 0    | 0.9989031 |
| 13861  | 'Epx'     | 0    | 2.06  | 0     | 0    | 0    | 0     | 0    | 0    | 0    | 0    | 1.74E-12  |
| 13866  | 'Erbb2'   | 0    | 0     | 0     | 0    | 0    | 0     | 0.01 | 0.05 | 2.4  | 0    | 2.86E-13  |
| 14063  | 'F2rl1'   | 0    | 0     | 1.4   | 0    | 0    | 0     | 0    | 0    | 0    | 0    | 1.80E-12  |
| 140806 | 'Il25'    | 0    | 0     | 0     | 0    | 0    | 0     | 0    | 0    | 0    | 3.06 | 1.87E-11  |
| 14089  | 'Fap'     | 0    | 0     | 0     | 0    | 0    | 0     | 2.91 | 0    | 0    | 0    | 1.50E-12  |
| 14107  | 'Fat1'    | 0.88 | 1.16  | 0.76  | 0.29 | 0.48 | 0     | 0    | 0.02 | 0.01 | 0.11 | 3.80E-05  |
| 14119  | 'Fbn2'    | 2.16 | 1.41  | 1.14  | 0    | 1.38 | 0     | 0.01 | 0.03 | 0.14 | 0    | 0.0014945 |
| 14129  | 'Fcgr1'   | 0    | 0     | 0     | 0    | 0    | 6.74  | 0    | 1.46 | 0    | 0.74 | 8.47E-04  |
| 14233  | 'Foxi1'   | 0    | 0     | 0     | 0    | 0    | 1.64  | 0    | 0    | 0    | 0    | 1.06E-11  |
| 14254  | 'Flt1'    | 0    | 0     | 0     | 0    | 0.56 | 0     | 0    | 0    | 0    | 0    | 0.0327819 |
| 14264  | 'Fmod'    | 0    | 0     | 0     | 0    | 0    | 0     | 1.93 | 0    | 0    | 0    | 4.07E-12  |
| 142681 | 'Slc34a3' | 0    | 0     | 0     | 0    | 1.97 | 0     | 0    | 0    | 0    | 0    | 1.36E-12  |
| 14427  | 'Galr1'   | 8.2  | 18.8  | 23.8  | 0    | 0    | 75.9  | 45.5 | 51.7 | 49.6 | 60.3 | 1.833E-05 |
| 14555  | 'Gpd1'    | 0.45 | 0.51  | 6.8   | 10.1 | 0.19 | 0.03  | 0    | 0.09 | 0.15 | 0.02 | 4.36E-06  |
| 14587  | 'Gfra3'   | 1.94 | 0     | 0     | 0    | 0    | 0     | 0    | 0    | 0    | 0    | 1.62E-12  |
| 14872  | 'Gstt2'   | 9.08 | 12.35 | 6.78  | 16.2 | 5.88 | 39.35 | 28.7 | 9.83 | 19.1 | 36.5 | 0.0022469 |
| 14961  | 'H2-Ab1'  | 0    | 0     | 0     | 0    | 0    | 9.44  | 0    | 0    | 0    | 0    | 3.56E-13  |
| 14964  | 'H2-D1'   | 70   | 41.7  | 82.19 | 133  | 64.5 | 223.8 | 83.5 | 34.4 | 340  | 363  | 0.0044216 |
| 15000  | 'H2-DMb2' | 0    | 0     | 10.72 | 0    | 0    | 0     | 0    | 0    | 0    | 0    | 1.57E-13  |
| 15214  | 'Hey2'    | 0    | 0     | 0     | 0    | 0    | 0     | 0    | 0    | 4.16 | 0    | 8.89E-13  |
| 15450  | 'Lipc'    | 0    | 0     | 0     | 0    | 3    | 0     | 0    | 0    | 0    | 0    | 5.58E-13  |
| 15485  | 'Hsd17b1' | 0    | 0     | 0     | 0    | 0    | 0     | 0    | 0    | 1.63 | 0    | 2.21E-11  |
| 15486  | 'Hsd17b2' | 0    | 0     | 0     | 0    | 0    | 0     | 0    | 4.32 | 0    | 0    | 3.90E-12  |
| 15557  | 'Htr1f'   | 54.4 | 33.2  | 0     | 74   | 0    | 0     | 0    | 0    | 0    | 0    | 4.99E-15  |
| 15894  | 'Icam1'   | 0    | 0     | 0     | 0    | 0    | 6.16  | 0    | 0    | 0    | 0    | 9.74E-14  |
| 15945  | 'Cxcl10'  | 0    | 0     | 0.04  | 13.3 | 5.7  | 0     | 0    | 0    | 0    | 0    | 0.0027536 |
| 16145  | 'Igtf'    | 2.59 | 0     | 0.15  | 31.3 | 4.14 | 0     | 0.02 | 0    | 0    | 0    | 1.23E-07  |
| 16172  | 'Il17ra'  | 0    | 0     | 0     | 0    | 0    | 1.51  | 0.01 | 0    | 5.92 | 4.38 | 3.68E-06  |
| 16177  | 'Il1r1'   | 0.92 | 0     | 0     | 0    | 0    | 0     | 0    | 0    | 0    | 0    | 2.42E-12  |
| 16398  | 'Itga2'   | 0    | 0     | 0.85  | 0    | 0    | 0     | 0    | 0    | 0    | 0    | 2.38E-12  |
| 16414  | 'Itgb2'   | 0    | 0     | 0     | 0    | 0    | 5.89  | 0    | 0    | 0    | 0.08 | 6.94E-14  |
| 16416  | 'Itgb3'   | 0    | 0     | 1.16  | 0    | 0    | 0     | 0    | 0    | 0    | 0    | 2.58E-13  |
| 16419  | 'Itgb5'   | 20   | 5.2   | 10.09 | 0    | 30.8 | 58.03 | 80.8 | 101  | 50   | 40   | 2.07E-04  |



|        |             |      |       |       |      |      |       |      |      |      |      |           |
|--------|-------------|------|-------|-------|------|------|-------|------|------|------|------|-----------|
| 20197  | 'S100a3'    | 0    | 0     | 1.79  | 0    | 0    | 0     | 0    | 0    | 0    | 0    | 0.0412546 |
| 20276  | 'Scnn1a'    | 0    | 0     | 0     | 7.07 | 0    | 0     | 0.04 | 1.28 | 3.71 | 2.24 | 0.9776893 |
| 20277  | 'Scnn1b'    | 0    | 6.09  | 0     | 0    | 0    | 0     | 0    | 0    | 0    | 0    | 1.10E-14  |
| 20299  | 'Ccl22'     | 5.89 | 0     | 0     | 0    | 0    | 0     | 0    | 0    | 0    | 0    | 5.54E-14  |
| 20495  | 'Slc12a1'   | 0    | 0     | 0     | 0    | 0    | 0     | 0.89 | 0    | 0    | 0    | 1.01E-11  |
| 20526  | 'Slc2a2'    | 0    | 0     | 0     | 0.02 | 0    | 0     | 2.32 | 0    | 0    | 0    | 0.0242788 |
| 20657  | 'Sod3'      | 2.89 | 1.88  | 2.17  | 0    | 0    | 0     | 0    | 0    | 0    | 0    | 0.004283  |
| 20669  | 'Sox14'     | 0    | 0     | 0     | 0    | 0    | 0     | 0    | 3.09 | 0    | 0.02 | 2.22E-12  |
| 20700  | 'Serpina1a' | 2.66 | 0     | 0     | 0    | 0    | 0     | 0    | 0    | 0    | 0    | 9.14E-13  |
| 20703  | 'Serpina1d' | 4.49 | 0     | 0     | 0    | 0    | 0     | 0    | 0    | 0    | 0    | 7.80E-13  |
| 207742 | 'Rnf43'     | 0    | 0     | 1.19  | 0    | 0    | 0     | 0    | 0    | 0    | 0    | 6.52E-13  |
| 208595 | 'Mterf1b'   | 0    | 0     | 0     | 0    | 0    | 11.24 | 0    | 0    | 2.52 | 0    | 2.90E-13  |
| 208760 | 'Aqp12'     | 0    | 0     | 3.28  | 0    | 0    | 0     | 0    | 0    | 0    | 0    | 0.0359563 |
| 209707 | 'Lcorl'     | 3.54 | 7.87  | 5.36  | 4.72 | 4.55 | 1.44  | 1.58 | 2    | 2.23 | 2.34 | 1.00E-04  |
| 211488 | 'Ado'       | 14.6 | 11.43 | 9     | 8.59 | 11.9 | 4.31  | 4.67 | 4.3  | 4.1  | 1.74 | 1.83E-05  |
| 212541 | 'Rho'       | 0    | 1.37  | 0     | 0    | 0    | 0     | 0    | 0    | 0    | 0    | 8.39E-13  |
| 212989 | 'Best2'     | 0    | 0     | 0     | 0    | 0    | 0     | 0    | 0.02 | 0    | 2.76 | 4.84E-12  |
| 21337  | 'Tacr2'     | 0    | 0     | 0     | 0    | 0    | 0     | 0    | 0    | 2.82 | 0    | 2.80E-12  |
| 213409 | 'Lemd1'     | 0.52 | 0     | 0     | 0.3  | 2.23 | 15.08 | 6.08 | 2.99 | 25.9 | 11.1 | 2.99E-04  |
| 213527 | 'Pth2r'     | 0    | 1.5   | 3.22  | 5.24 | 8.12 | 0     | 0    | 0    | 0    | 0    | 2.28E-07  |
| 213696 | 'Duoxa1'    | 0    | 0     | 3.8   | 0    | 0    | 0     | 0    | 0    | 0    | 0    | 5.82E-13  |
| 214058 | 'Megf11'    | 6.8  | 3.2   | 30.17 | 2.55 | 12.5 | 4.41  | 2.17 | 4.1  | 0.97 | 2.04 | 0.0035413 |
| 214111 | 'Slc24a1'   | 0.25 | 1.13  | 1.25  | 2.16 | 1.58 | 0     | 0    | 0    | 0.01 | 0    | 6.05E-11  |
| 214359 | 'Tmem51'    | 4.86 | 2.57  | 0.03  | 10.2 | 4.35 | 0     | 0    | 0    | 0    | 0    | 1.41E-08  |
| 214425 | 'Cilp'      | 0    | 0     | 0     | 0    | 0    | 0     | 0    | 0    | 0    | 1.69 | 1.64E-12  |
| 215632 | 'Psd4'      | 0    | 0     | 0     | 0    | 2.17 | 0     | 0    | 0    | 0    | 0    | 1.04E-13  |
| 216049 | 'Zfp365'    | 21   | 17.2  | 11.25 | 9.18 | 29   | 8.23  | 9.44 | 7.07 | 11.9 | 8.89 | 0.0094139 |
| 216225 | 'Slc5a8'    | 0    | 0     | 0.73  | 0    | 0    | 0     | 0    | 0    | 0    | 0    | 1.64E-12  |
| 217216 | 'BC030867'  | 0    | 0     | 3.6   | 0    | 0    | 0     | 0    | 0    | 0    | 0    | 9.95E-13  |
| 217262 | 'Abca9'     | 0.84 | 0     | 0     | 0    | 0    | 0     | 0    | 0    | 0    | 0    | 6.93E-13  |
| 217304 | 'Cd300lb'   | 0    | 0     | 0     | 0    | 0    | 0     | 0    | 0    | 0    | 2.4  | 1.76E-12  |
| 217333 | 'Trim47'    | 0    | 0     | 0     | 4.1  | 1.48 | 0     | 0    | 0    | 0    | 0    | 3.47E-14  |
| 217369 | 'Uts2r'     | 40.2 | 77.2  | 11.5  | 0    | 59.3 | 216.1 | 195  | 134  | 168  | 154  | 5.31E-04  |
| 21815  | 'Tgif1'     | 0    | 0     | 0     | 0    | 0    | 5.03  | 0    | 3.95 | 0    | 0    | 1.05E-13  |
| 21824  | 'Thbd'      | 0    | 0     | 0     | 0    | 0    | 3.82  | 0    | 0    | 0.4  | 0    | 9.33E-14  |
| 21828  | 'Thbs4'     | 18.6 | 0     | 0     | 2.95 | 0    | 0     | 0    | 0    | 0    | 0    | 5.47E-19  |
| 218630 | 'Ccno'      | 0    | 0     | 1.6   | 0    | 0    | 0     | 0    | 0    | 0    | 0    | 0.0427915 |
| 218877 | 'Sema3g'    | 0    | 0     | 0     | 0    | 0    | 0     | 0    | 0    | 3.07 | 0    | 2.91E-13  |
| 219103 | 'Cenpj'     | 0.55 | 1.57  | 0.99  | 0    | 0.97 | 0     | 0    | 0.01 | 0    | 0    | 4.31E-05  |
| 22178  | 'Tyrp1'     | 0    | 0     | 0     | 0    | 0    | 0     | 0    | 0    | 0    | 4.12 | 3.35E-13  |
| 22242  | 'Umod'      | 0    | 0     | 0     | 0    | 0    | 0     | 0    | 0    | 6.3  | 0    | 1.14E-13  |
| 22262  | 'Uox'       | 2.95 | 0     | 0     | 0    | 0    | 0     | 0    | 0    | 0    | 0    | 5.74E-13  |
| 22269  | 'Upk2'      | 3.55 | 0     | 0     | 0    | 0    | 0     | 0    | 0    | 0    | 0    | 0.0425297 |
| 22359  | 'Vldlr'     | 6.15 | 12.78 | 13.18 | 7.09 | 8.79 | 3.59  | 3.76 | 5.36 | 4.96 | 3.98 | 9.19E-05  |
| 22361  | 'Vnn1'      | 0    | 0     | 2.58  | 0    | 0    | 0     | 0    | 0    | 0    | 0    | 5.93E-13  |
| 223915 | 'Krt73'     | 1.04 | 2.09  | 2.57  | 9.38 | 0.02 | 0     | 0.02 | 0    | 0    | 0    | 2.19E-07  |
| 224694 | 'Zfp81'     | 3.3  | 6.43  | 6.97  | 3.13 | 8.22 | 0.61  | 0.02 | 1.28 | 1.2  | 0.09 | 7.95E-04  |
| 225471 | 'Ticam2'    | 0    | 0     | 0     | 0    | 0    | 0     | 0    | 1.66 | 0    | 0    | 3.75E-12  |
| 226421 | 'Rab7b'     | 0    | 0     | 0     | 0    | 1.56 | 0     | 0    | 0    | 0    | 0    | 2.03E-13  |
| 226564 | 'Fmo4'      | 0    | 0     | 0     | 0    | 2.02 | 0     | 0    | 0    | 0    | 0    | 1.66E-12  |
| 227231 | 'Cps1'      | 0    | 0     | 0     | 0    | 0    | 2     | 0    | 0    | 0    | 0.02 | 2.98E-13  |
| 227358 | 'Erfe'      | 0    | 0     | 0     | 0    | 0    | 0     | 0    | 0    | 4.65 | 0    | 2.40E-13  |
| 228993 | 'Slc17a9'   | 0    | 0     | 0     | 0    | 0    | 3.64  | 0    | 0    | 0    | 0    | 9.56E-13  |
| 229003 | 'Helz2'     | 0    | 0     | 0     | 0    | 0    | 0     | 0    | 0    | 0    | 0.84 | 1.00E-10  |
| 229055 | 'Zbtb10'    | 0.2  | 0.21  | 0.76  | 2.36 | 0.03 | 0     | 0.01 | 0.01 | 0.02 | 0.01 | 1.94E-06  |
| 229302 | 'Tm4sf4'    | 2.31 | 0     | 0     | 0    | 0    | 0     | 0    | 0    | 0    | 0    | 0.0391328 |
| 229499 | 'Fcr11'     | 0    | 0     | 0     | 0    | 0    | 6.99  | 0    | 0    | 0    | 0    | 1.61E-13  |
| 230579 | 'Fam151a'   | 0    | 3.58  | 0     | 0    | 0    | 0     | 0    | 0    | 0    | 0    | 2.45E-13  |
| 230824 | 'Grhl3'     | 2.73 | 0     | 0     | 4.35 | 0    | 0     | 0    | 0    | 0    | 0    | 3.68E-13  |
| 232345 | 'A2m'       | 0    | 0     | 0     | 0    | 1.31 | 0     | 0    | 0    | 0    | 0    | 3.27E-13  |
| 232406 | 'BC035044'  | 0    | 0     | 0     | 0    | 0    | 7.48  | 0    | 0    | 2.95 | 0.02 | 1.92E-16  |

|        |                 |      |       |       |      |      |       |      |      |      |      |           |
|--------|-----------------|------|-------|-------|------|------|-------|------|------|------|------|-----------|
| 232431 | 'Gprc5a'        | 0    | 0     | 0     | 0    | 5.94 | 0     | 0    | 0    | 0    | 0    | 5.20E-14  |
| 232493 | 'Gys2'          | 0    | 0     | 1.11  | 0    | 0    | 0     | 0    | 0    | 0    | 0    | 0.0427915 |
| 232974 | 'Gm4881'        | 0    | 0     | 0     | 0    | 0    | 0     | 19.2 | 0    | 0    | 0    | 1.03E-14  |
| 234582 | 'Ccgc102a'      | 2.36 | 0     | 0     | 0    | 0    | 0     | 0    | 0    | 0    | 0    | 5.55E-13  |
| 234724 | 'Tat'           | 0    | 1.59  | 0     | 0    | 0    | 0     | 0    | 0    | 0    | 0    | 1.74E-12  |
| 235135 | 'Tmem45b'       | 0    | 0     | 5.4   | 0    | 20.5 | 0     | 0    | 0    | 0.04 | 0    | 3.41E-04  |
| 235415 | 'Cplx3'         | 0    | 0     | 5.3   | 0    | 0.02 | 0     | 0    | 0    | 0    | 0    | 1.58E-14  |
| 235587 | 'Parp3'         | 0    | 0     | 0     | 6.43 | 0    | 3.41  | 2.57 | 1.06 | 0.02 | 3.1  | 0.7474219 |
| 236573 | 'Gbp9'          | 0    | 0     | 0     | 0    | 3.16 | 0     | 0    | 0    | 0    | 0    | 3.65E-14  |
| 237523 | 'Ptpqr'         | 0.81 | 0     | 0     | 0    | 0    | 0     | 0    | 0    | 0    | 0    | 7.12E-13  |
| 23796  | 'Aplnr'         | 21.2 | 11.4  | 30.5  | 25.2 | 13.1 | 151.1 | 113  | 253  | 102  | 233  | 3.364E-08 |
| 23855  | 'Defa17'        | 0    | 0     | 0     | 0    | 0    | 0     | 34.3 | 0    | 0    | 0    | 5.74E-12  |
| 238663 | 'Spata31d1d'    | 0    | 0     | 0     | 0    | 0    | 1.64  | 0    | 0    | 0    | 0    | 2.06E-12  |
| 23923  | 'Aadat'         | 0    | 0     | 0     | 0    | 0    | 0     | 0    | 0    | 0    | 5.37 | 5.05E-13  |
| 239845 | 'Gpr156'        | 0    | 0     | 1.24  | 0    | 0    | 0     | 0    | 0    | 0    | 0    | 1.18E-12  |
| 240754 | 'Lax1'          | 1.29 | 0     | 0     | 0    | 0    | 0     | 0    | 0    | 0    | 0    | 0.0425297 |
| 24088  | 'Tlr2'          | 0    | 0     | 0     | 0    | 0    | 2.98  | 0    | 0    | 0    | 1.92 | 1.49E-13  |
| 24102  | 'Trex2'         | 0    | 3.33  | 0     | 0    | 0    | 0     | 0    | 0    | 0    | 0    | 0.0371568 |
| 241327 | 'Olfml2a'       | 0    | 0     | 0     | 0    | 0    | 0     | 0    | 0    | 2.94 | 0    | 1.95E-12  |
| 241633 | 'Atp8b4'        | 0    | 0.89  | 0     | 0    | 0    | 0     | 0    | 0    | 0    | 0    | 6.70E-13  |
| 242505 | 'Rasef'         | 0    | 0     | 0     | 0    | 0    | 0.6   | 0.88 | 0.01 | 0.31 | 0.46 | 6.86E-05  |
| 242646 | 'Tctex1d4'      | 0    | 0     | 0     | 0    | 0    | 0     | 0    | 7.89 | 0    | 0    | 1.21E-12  |
| 242702 | 'Myom3'         | 0.76 | 0     | 0     | 0    | 0    | 0     | 0    | 0    | 0    | 0    | 0.0397741 |
| 243653 | 'Clec1a'        | 0    | 0     | 2.13  | 0    | 0    | 0     | 0    | 0    | 0    | 0    | 2.58E-13  |
| 243911 | 'Kirrel2'       | 0    | 1.57  | 0     | 12.7 | 0    | 0     | 0    | 0    | 0    | 0    | 1.80E-15  |
| 244548 | 'Elmod2'        | 2.02 | 0.9   | 4.21  | 3.63 | 0.98 | 3.72  | 7.22 | 3.09 | 9.99 | 7.69 | 0.0017617 |
| 244813 | 'Bsx'           | 0    | 0     | 0     | 0    | 5.48 | 0     | 0    | 0    | 0    | 0    | 1.77E-13  |
| 245026 | 'Col6a6'        | 0    | 0     | 0     | 0    | 0    | 0     | 0    | 0    | 1.81 | 0.45 | 1.10E-13  |
| 245424 | 'Gpr101'        | 20.9 | 7.67  | 13.19 | 0    | 14.5 | 21.75 | 35.6 | 44.2 | 156  | 88.1 | 0.0296404 |
| 245532 | 'Awat2'         | 0    | 0     | 2.72  | 0    | 0    | 0     | 0    | 0    | 0    | 0    | 9.95E-13  |
| 245671 | 'Klf8'          | 0    | 0.03  | 0.02  | 0.02 | 0    | 0.35  | 0.02 | 1.57 | 5.11 | 1.22 | 2.06E-06  |
| 245695 | 'Tceanc'        | 2.2  | 1.06  | 0.97  | 0.17 | 0.57 | 0     | 0.01 | 0.08 | 0.08 | 0.03 | 2.01E-04  |
| 245877 | 'Map7d1'        | 22.9 | 22.73 | 16.77 | 31.4 | 27.2 | 9.72  | 11.5 | 12.2 | 16.6 | 11.2 | 8.20E-05  |
| 257947 | 'Olf1543'       | 0    | 0     | 0     | 0    | 0    | 0     | 0    | 0    | 3.33 | 0    | 1.75E-11  |
| 258470 | 'Olf191'        | 0    | 0     | 0     | 4.75 | 0    | 4.22  | 0    | 0    | 0    | 0    | 0.9876207 |
| 258745 | 'Olf1689'       | 0    | 0     | 0     | 0    | 3.24 | 0     | 0    | 0    | 0    | 0    | 0.0404979 |
| 258938 | 'Olf1417'       | 0    | 0     | 0     | 0    | 0    | 0     | 6.81 | 0    | 0    | 0    | 2.84E-12  |
| 259051 | 'Olf1658'       | 0    | 0     | 0     | 0    | 0    | 3.1   | 0    | 0    | 0    | 0.06 | 5.84E-13  |
| 260408 | 'Prss45'        | 0    | 0     | 0     | 0    | 0    | 0     | 0    | 0    | 2.96 | 0    | 1.90E-11  |
| 26366  | 'Ceacam10'      | 0    | 0     | 0     | 0    | 0    | 0     | 0    | 6.72 | 0    | 0    | 3.01E-12  |
| 266632 | 'Irak4'         | 69.3 | 20.5  | 50.3  | 0    | 12.5 | 399.5 | 0    | 301  | 223  | 195  | 0.021491  |
| 268288 | 'Samd3'         | 8.9  | 3.2   | 10.41 | 0    | 5.24 | 87.08 | 3.24 | 4.25 | 56.7 | 82   | 0.0157809 |
| 268379 | 'Abca13'        | 0    | 0     | 0     | 0    | 0    | 0     | 1.23 | 0    | 0    | 0    | 7.94E-14  |
| 269053 | 'Gpr152'        | 0    | 0     | 0     | 0    | 0    | 0     | 0    | 0    | 0    | 1.08 | 8.79E-12  |
| 27220  | 'Cartpt'        | 341  | 616.6 | 449.3 | 260  | 153  | 26.1  | 8.57 | 28.8 | 332  | 74.5 | 0.0268095 |
| 27411  | 'Slc14a2'       | 0    | 0     | 0     | 0    | 0    | 0     | 0    | 0    | 0    | 8.34 | 3.08E-13  |
| 27643  | 'Ubl4a'         | 28.5 | 32.74 | 39.59 | 79.6 | 50.6 | 71.55 | 73.1 | 63.7 | 74.7 | 60.6 | 0.0294218 |
| 27883  | 'Tango2'        | 104  | 113.6 | 172.7 | 126  | 175  | 273.4 | 250  | 249  | 248  | 179  | 6.24E-05  |
| 279706 | 'Nup62cl'       | 0    | 0     | 0     | 21.4 | 0    | 0     | 0    | 0    | 0    | 31.1 | 0.9062676 |
| 29870  | 'Gtse1'         | 0    | 0     | 0     | 8.11 | 2.14 | 0     | 0    | 0    | 0    | 0    | 1.92E-15  |
| 30806  | 'Adamts8'       | 0    | 0     | 0     | 0    | 0    | 0     | 0    | 0    | 0    | 0.94 | 8.79E-12  |
| 30878  | 'Apln'          | 1.12 | 2.9   | 2.78  | 0    | 3.41 | 0     | 0    | 0    | 0    | 0    | 1.38E-06  |
| 30941  | 'Usp21'         | 54.1 | 31.8  | 25.28 | 5.05 | 38.1 | 16.96 | 18.4 | 24   | 15.3 | 12.8 | 0.117979  |
| 317757 | 'Gimap5'        | 0    | 0     | 0     | 0    | 0    | 0     | 0    | 0    | 0    | 3.52 | 3.81E-12  |
| 319259 | 'Bricd5'        | 0    | 0     | 0     | 0    | 0    | 0     | 13.8 | 0    | 0    | 0    | 2.19E-13  |
| 319433 | 'Serpine3'      | 0    | 0     | 0     | 0    | 0    | 0     | 0.04 | 0    | 3.64 | 0    | 6.01E-12  |
| 319776 | 'Tmem72'        | 0    | 0     | 0     | 0    | 3.09 | 0     | 0    | 0    | 0    | 0    | 3.65E-14  |
| 320309 | '1520401A03Rik' | 0    | 0     | 0     | 0    | 0    | 2.59  | 0    | 0    | 0    | 0    | 1.84E-12  |
| 320701 | 'Fam19a4'       | 0    | 12.71 | 10.75 | 0    | 0    | 0     | 0.02 | 0    | 0.02 | 0    | 2.25E-04  |
| 320747 | 'Lingo4'        | 0    | 1.46  | 1.26  | 0    | 2.45 | 0     | 0.02 | 0    | 0    | 0    | 0.0020198 |
| 320981 | 'Enpp6'         | 0    | 0     | 0     | 0    | 5.12 | 0     | 0    | 0    | 0    | 0    | 2.02E-14  |



|        |                 |      |       |       |      |      |       |      |      |      |      |           |
|--------|-----------------|------|-------|-------|------|------|-------|------|------|------|------|-----------|
| 328258 | 'Slc25a48'      | 0    | 0     | 0     | 0    | 0    | 0     | 0    | 0    | 0    | 3.23 | 5.91E-12  |
| 328643 | 'Vwa5b2'        | 6.9  | 7.38  | 15.62 | 0.97 | 13.1 | 2.22  | 3.66 | 5.78 | 4.61 | 2    | 0.0406949 |
| 328779 | 'Hs3st6'        | 3.53 | 0     | 0     | 0    | 0    | 0     | 0    | 0    | 0    | 0    | 5.25E-12  |
| 329064 | 'Pkd2l1'        | 1.15 | 0     | 0     | 0    | 0    | 0     | 0    | 0    | 0    | 0    | 1.62E-12  |
| 329738 | 'Aknad1'        | 0    | 2.89  | 0     | 0    | 0    | 0     | 0    | 0    | 0    | 0    | 3.01E-13  |
| 330050 | 'Fam185a'       | 20.5 | 15.79 | 15    | 15.2 | 9.61 | 5.7   | 8.69 | 5.32 | 6.8  | 7.33 | 7.70E-06  |
| 333669 | 'Gm5134'        | 0    | 0     | 0     | 0    | 2.29 | 0     | 0    | 0    | 0    | 0    | 2.78E-13  |
| 338403 | 'Cndp1'         | 0    | 0     | 1.6   | 0    | 0    | 0     | 0    | 0    | 0    | 0    | 0.0377994 |
| 353344 | 'Opn5'          | 0    | 0     | 0.03  | 0    | 0    | 0     | 0    | 0.02 | 25   | 22.8 | 4.07E-06  |
| 380924 | 'Olfm4'         | 0    | 0     | 4.66  | 0    | 0    | 0     | 0    | 0    | 0    | 0    | 3.56E-14  |
| 381201 | 'Ap5b1'         | 0.02 | 0     | 0     | 0    | 3.48 | 0     | 0    | 0    | 0    | 0    | 6.27E-14  |
| 381293 | 'Kif14'         | 0    | 0     | 0     | 0    | 0    | 0     | 0    | 0    | 0.53 | 0    | 1.45E-11  |
| 381319 | 'Batf3'         | 0    | 0     | 0     | 0    | 0    | 6.21  | 0    | 0    | 0    | 0    | 8.90E-12  |
| 381546 | 'Ccdc24'        | 0    | 0     | 0     | 7.87 | 0    | 0     | 0    | 0    | 0    | 3.5  | 0.7031542 |
| 384071 | 'Slc25a34'      | 0    | 0     | 0     | 0    | 0    | 0     | 0    | 0    | 0    | 3.31 | 7.66E-13  |
| 384198 | 'Fam47e'        | 0    | 0     | 0     | 0    | 0    | 0     | 0    | 0    | 3.76 | 0    | 2.01E-12  |
| 385354 | 'Frm7'          | 0    | 0     | 0     | 0    | 0    | 0     | 1.67 | 0    | 0    | 0    | 1.29E-12  |
| 386753 | 'Dbpht2'        | 41.2 | 72.72 | 34.37 | 107  | 67.7 | 14.74 | 29.3 | 23.4 | 15.1 | 28   | 1.36E-05  |
| 399599 | 'Ccdc87'        | 0    | 0     | 0     | 0    | 0    | 2.35  | 0    | 1.11 | 0    | 0    | 0.0079868 |
| 403180 | 'Ccdc121'       | 0    | 0     | 0     | 0    | 0    | 0     | 0    | 0.02 | 0    | 5.82 | 3.74E-11  |
| 406219 | 'Krt87'         | 0    | 0     | 0     | 0    | 0    | 0     | 0    | 0    | 4.67 | 0    | 6.84E-11  |
| 408059 | 'BC049352'      | 0    | 5.32  | 0.06  | 0    | 0    | 0     | 0    | 0    | 0    | 0    | 9.39E-14  |
| 432677 | 'Vrtn'          | 0    | 0     | 0     | 0    | 2.79 | 0     | 0    | 0    | 0    | 0    | 1.24E-13  |
| 434215 | 'Lrrc32'        | 0    | 0     | 0     | 0    | 0    | 0     | 0    | 0    | 3.77 | 0    | 5.19E-13  |
| 435529 | 'Adgrf2'        | 0    | 0     | 0     | 0    | 0    | 0     | 2.05 | 0    | 1.19 | 0    | 4.83E-14  |
| 503491 | 'Defa24'        | 0    | 0     | 0     | 0    | 0    | 0     | 43.5 | 0    | 0    | 0    | 1.15E-13  |
| 50706  | 'Postn'         | 0    | 0     | 0     | 0    | 0    | 0     | 0    | 0    | 7.12 | 0    | 3.51E-14  |
| 52020  | 'Umodl1'        | 0.68 | 0     | 0     | 0    | 0    | 0     | 0    | 0    | 0    | 0    | 2.54E-12  |
| 52551  | 'Sgta'          | 137  | 156.9 | 152.7 | 201  | 137  | 184.1 | 248  | 230  | 163  | 234  | 0.0067916 |
| 52570  | 'Ccdc69'        | 0    | 0     | 3.24  | 0    | 0    | 0     | 0    | 0    | 0    | 0    | 1.03E-12  |
| 53419  | 'Corin'         | 0.03 | 3.01  | 0.02  | 0    | 0.01 | 0.01  | 0    | 0    | 0.01 | 0    | 0.0024889 |
| 53867  | 'Col5a3'        | 0    | 0     | 1.67  | 0    | 0    | 0     | 0    | 0    | 0    | 0    | 6.26E-14  |
| 53868  | 'Rab25'         | 0    | 0     | 0     | 0    | 16.8 | 0     | 0    | 0    | 0    | 0    | 9.16E-15  |
| 53945  | 'Slc40a1'       | 0    | 0     | 0.01  | 0    | 0.03 | 0.12  | 3.31 | 0    | 1.83 | 1.94 | 9.81E-05  |
| 54485  | 'Dil4'          | 0    | 0     | 0     | 0    | 0    | 0     | 0    | 0    | 2.23 | 0    | 1.44E-12  |
| 545055 | 'Cma2'          | 4.03 | 0     | 0     | 0    | 0    | 0     | 0    | 0    | 0    | 0    | 1.48E-12  |
| 545758 | 'Gm5868'        | 0    | 2.87  | 0     | 0    | 0    | 0     | 0    | 0    | 0    | 0    | 4.90E-12  |
| 54624  | 'Paf1'          | 52   | 64.97 | 44.88 | 32.4 | 57   | 104.6 | 132  | 69.4 | 97.6 | 77.2 | 2.15E-04  |
| 546519 | 'Tmem235'       | 0    | 0     | 0     | 0    | 0    | 0     | 0    | 0    | 4.9  | 2.49 | 2.16E-13  |
| 56050  | 'Cyp39a1'       | 0    | 0     | 0     | 0.64 | 0    | 0     | 0    | 1.03 | 0    | 0    | 0.7885752 |
| 56183  | 'Nmu'           | 0    | 0     | 0     | 0    | 0    | 0     | 0    | 17.9 | 0    | 0    | 1.63E-13  |
| 56212  | 'Rhog'          | 3.14 | 19.37 | 26.86 | 0    | 17.9 | 1.22  | 0.04 | 1.36 | 3.61 | 3.42 | 0.0266861 |
| 56318  | 'Acpp'          | 0    | 0     | 0     | 0    | 2.03 | 0     | 0    | 0    | 0    | 0    | 7.99E-14  |
| 56460  | 'Pkp3'          | 0    | 0     | 0     | 0    | 0    | 0     | 0    | 0    | 2.51 | 5.03 | 4.21E-14  |
| 56485  | 'Slc2a5'        | 0    | 0     | 0     | 0    | 0    | 6.24  | 0    | 0    | 2.72 | 1.71 | 3.63E-04  |
| 56643  | 'Slc15a1'       | 0    | 0     | 0     | 0    | 0    | 0     | 0    | 1.07 | 0    | 0    | 1.83E-11  |
| 56720  | 'Tdo2'          | 0    | 0     | 0     | 0    | 0    | 0     | 0    | 0    | 3.23 | 0    | 5.44E-12  |
| 56735  | 'Krt71'         | 0    | 0     | 0     | 0    | 0    | 0     | 9.5  | 0    | 0    | 0    | 5.33E-14  |
| 56811  | 'Dkk2'          | 0    | 0     | 0     | 0    | 0    | 0     | 0    | 0    | 1.61 | 1.77 | 2.53E-13  |
| 57444  | 'Isg20'         | 0    | 0     | 0     | 0.07 | 0    | 0     | 0    | 5.38 | 0    | 0    | 0.0221525 |
| 58185  | 'Rsad2'         | 0    | 1.88  | 1.97  | 0.62 | 3.44 | 0     | 0    | 0    | 0    | 0.01 | 2.53E-06  |
| 58203  | 'Zbp1'          | 0    | 0     | 0     | 0    | 0    | 14.57 | 0    | 0    | 0    | 0    | 3.64E-13  |
| 59058  | 'Bhlhe22'       | 0    | 0     | 0     | 0    | 0    | 2.12  | 0.25 | 0.42 | 1.59 | 0    | 5.05E-04  |
| 59083  | 'Fetub'         | 0    | 3.03  | 0     | 0    | 0    | 0     | 0    | 0    | 0    | 0    | 1.40E-12  |
| 60363  | 'Cldn15'        | 0    | 0     | 2.45  | 0.87 | 0    | 0     | 0    | 0    | 0    | 0    | 0.0178771 |
| 619332 | '4933416C03Rik' | 0    | 0     | 0     | 0    | 0    | 0     | 2.28 | 0    | 0    | 0    | 5.23E-12  |
| 620292 | 'Cntnap5c'      | 0.81 | 1.7   | 6.93  | 11.4 | 3.31 | 8.38  | 31.9 | 6.83 | 28.7 | 20.9 | 0.001538  |
| 622307 | '5830473C10Rik' | 1.51 | 0     | 0     | 0    | 0    | 0     | 0    | 0    | 0    | 0    | 1.88E-12  |
| 622554 | 'Majin'         | 0    | 0     | 2.6   | 0    | 0    | 0     | 0    | 0    | 0    | 0    | 1.67E-13  |
| 626215 | 'Gm6657'        | 0    | 0     | 0     | 0    | 0    | 0     | 0    | 0    | 1.06 | 0    | 1.87E-11  |
| 626578 | 'Gbp10'         | 0    | 0     | 0     | 0    | 2.55 | 0     | 0    | 0    | 0    | 0    | 2.14E-13  |

|        |                 |      |       |       |      |      |       |      |      |      |      |           |
|--------|-----------------|------|-------|-------|------|------|-------|------|------|------|------|-----------|
| 631323 | 'Gm12250'       | 1.7  | 0     | 0     | 0    | 0    | 0     | 0    | 0    | 0    | 0    | 9.14E-13  |
| 631797 | 'Fer1l6'        | 0    | 1.11  | 0     | 0    | 0    | 0     | 0    | 0    | 0    | 0    | 3.13E-13  |
| 636931 | 'Trim71'        | 0    | 0     | 0     | 0    | 0    | 0     | 0    | 1.54 | 0    | 0    | 1.22E-12  |
| 64008  | 'Aqp9'          | 0    | 0     | 0     | 0    | 0    | 0     | 3.68 | 0    | 0    | 0    | 2.01E-11  |
| 64009  | 'Syne1'         | 13.3 | 17.67 | 9.46  | 32.2 | 17.8 | 22.23 | 23.5 | 18.5 | 51.3 | 46.4 | 0.0120642 |
| 64074  | 'Smoc2'         | 2.79 | 0     | 21.14 | 0    | 0    | 0     | 0    | 0    | 0    | 0    | 7.97E-19  |
| 64075  | 'Smoc1'         | 21.9 | 42.68 | 25.45 | 1.83 | 22.3 | 3.85  | 14.7 | 5.73 | 9.74 | 14.7 | 0.0514525 |
| 64899  | 'Lpin3'         | 0    | 0     | 0     | 0    | 0    | 2.36  | 0    | 0    | 2.51 | 1.03 | 0.0014822 |
| 654821 | 'Gcnt7'         | 0    | 0     | 0     | 0    | 0.02 | 2.46  | 4.59 | 0    | 0.29 | 0.02 | 6.52E-04  |
| 65971  | 'Tbata'         | 0    | 2.98  | 0     | 0    | 0    | 0     | 0    | 0    | 0    | 0    | 1.25E-12  |
| 66442  | 'Spc25'         | 0    | 3.08  | 0     | 0    | 0    | 0     | 0    | 0    | 0    | 0    | 1.08E-12  |
| 665095 | 'Cyp2j8'        | 1.91 | 0     | 0     | 0    | 0    | 0     | 0    | 0    | 0    | 0    | 0.0411123 |
| 665574 | 'Gm7694'        | 1.47 | 1.95  | 4.64  | 0    | 0    | 0     | 0    | 0    | 0    | 0    | 2.01E-04  |
| 66765  | '4933411K16Rik' | 0    | 0     | 0     | 0    | 0    | 0     | 0    | 0    | 0    | 3.13 | 8.79E-12  |
| 667663 | 'Myo3a'         | 0    | 0     | 0.68  | 0    | 0    | 0     | 0    | 0    | 0    | 0    | 0.0353757 |
| 66864  | 'Clec14a'       | 0    | 0     | 0     | 0    | 0    | 0     | 2.73 | 0    | 0    | 0    | 1.35E-12  |
| 66940  | 'Shisa5'        | 69.5 | 94.16 | 63.33 | 157  | 61.5 | 153.2 | 95.9 | 154  | 205  | 194  | 0.0038767 |
| 66953  | 'Cdca7'         | 0    | 0     | 0     | 0    | 0    | 0     | 3.78 | 0    | 0    | 2.59 | 1.36E-13  |
| 67109  | 'Zfp787'        | 0.19 | 0.28  | 0.1   | 1.36 | 0.39 | 4.17  | 1.02 | 0.96 | 2.55 | 1.58 | 0.0229686 |
| 67375  | 'Qprt'          | 0    | 5.3   | 0     | 0    | 0    | 0     | 0    | 0    | 0    | 0    | 3.42E-13  |
| 67498  | 'Kcnv1'         | 1.53 | 4.25  | 0.95  | 0.01 | 0.03 | 0.02  | 0.01 | 0.01 | 0.01 | 0.02 | 5.93E-05  |
| 67666  | 'Hapln3'        | 0    | 0     | 0     | 0    | 0    | 0     | 5.71 | 0    | 0    | 0    | 1.55E-12  |
| 67749  | 'Mgarp'         | 0    | 0     | 0     | 0.05 | 6.58 | 0     | 0    | 0    | 0    | 0    | 1.33E-13  |
| 67849  | 'Cdca5'         | 0    | 0     | 1.62  | 0    | 0    | 0     | 0    | 0    | 0    | 0    | 0.0412546 |
| 67859  | 'Cysrt1'        | 0    | 0     | 0     | 0    | 0    | 8.91  | 0    | 0    | 0    | 0    | 1.93E-12  |
| 68021  | 'Bphl'          | 39.4 | 23.47 | 32.5  | 24.5 | 30.2 | 63.57 | 62.5 | 53.6 | 57.2 | 56.3 | 8.65E-06  |
| 68172  | 'Rpl39l'        | 0    | 9.36  | 0     | 0    | 0    | 0     | 0    | 0    | 0    | 0    | 2.07E-13  |
| 68279  | 'Mcoln2'        | 0    | 0     | 1.32  | 0    | 0    | 0     | 0    | 0    | 0    | 0    | 1.14E-12  |
| 68375  | 'Ndufa8'        | 508  | 460.2 | 473.6 | 550  | 446  | 784.7 | 539  | 664  | 734  | 659  | 3.04E-04  |
| 68792  | 'SrpX2'         | 0    | 0     | 0     | 0    | 0    | 0     | 3.2  | 0    | 0    | 0    | 7.38E-13  |
| 68857  | 'Dtw2'          | 0.62 | 0.15  | 0.86  | 0    | 1.55 | 0     | 0    | 0.01 | 0    | 0    | 0.0020127 |
| 69068  | 'Tcim'          | 0    | 0     | 0     | 0    | 0    | 0.04  | 0    | 0    | 5.03 | 0    | 2.51E-12  |
| 69121  | 'Chrdl2'        | 0    | 0     | 3.07  | 0    | 0    | 0     | 0    | 0    | 0    | 0    | 9.62E-13  |
| 69123  | 'Eci3'          | 0    | 0     | 0     | 0    | 2.94 | 0     | 0    | 0    | 0    | 0    | 1.66E-12  |
| 69146  | 'Gsdmd'         | 0    | 0     | 0     | 0    | 0    | 0     | 0    | 0    | 0    | 2.97 | 4.57E-12  |
| 69387  | 'Dnajb13'       | 0    | 0     | 0     | 0    | 0    | 0     | 0    | 0    | 0    | 4.26 | 6.40E-12  |
| 70316  | 'Ndufab1'       | 467  | 428.7 | 431.8 | 362  | 405  | 616.2 | 512  | 528  | 611  | 574  | 2.64E-04  |
| 70866  | 'Slco6d1'       | 0    | 0     | 0     | 0    | 0    | 0     | 0    | 0    | 0    | 1.35 | 1.27E-11  |
| 70989  | 'Jhy'           | 0    | 0     | 0     | 0    | 3.45 | 0     | 0    | 0    | 0    | 0    | 4.53E-14  |
| 71093  | 'Atoh8'         | 0    | 0     | 0     | 0    | 2.31 | 0     | 0    | 0    | 0    | 0    | 5.08E-13  |
| 71355  | 'Col24a1'       | 0    | 0     | 1.2   | 0    | 0    | 0     | 0    | 0    | 0    | 0    | 4.08E-13  |
| 71367  | 'Chst9'         | 0    | 0     | 3.01  | 0    | 0    | 0     | 0    | 0    | 0    | 0    | 1.03E-11  |
| 71724  | 'Aox3'          | 0    | 0     | 0     | 0    | 0    | 0     | 0    | 0    | 0    | 1.66 | 2.22E-12  |
| 71839  | 'Osgin1'        | 0    | 0     | 0     | 0    | 0    | 0     | 2.25 | 0    | 0    | 0    | 8.76E-12  |
| 71862  | 'Gpr160'        | 0    | 0     | 0     | 0.03 | 0    | 9.06  | 0    | 0    | 0    | 0    | 0.0055067 |
| 71872  | 'Aox4'          | 0    | 0     | 0     | 0    | 0    | 0     | 0    | 1.77 | 0    | 0    | 7.26E-13  |
| 71874  | '2310007B03Rik' | 0    | 0     | 0     | 0    | 0    | 0     | 0    | 0    | 0    | 1.73 | 1.10E-11  |
| 71951  | 'Gpc2'          | 2.72 | 1.44  | 0.89  | 0    | 0.19 | 0     | 0    | 0    | 0    | 0    | 5.83E-04  |
| 72112  | 'Ppp1r14d'      | 0    | 0     | 0     | 0    | 4.96 | 0     | 0    | 0    | 0    | 0    | 0.0338858 |
| 72169  | 'Trim29'        | 0    | 0     | 0     | 0    | 0    | 0     | 0    | 1.05 | 0    | 0    | 2.41E-11  |
| 72293  | 'Nkd2'          | 0    | 0.01  | 0     | 0    | 0    | 0     | 0    | 2.45 | 8.34 | 0.01 | 1.54E-04  |
| 72388  | 'Ripk4'         | 0    | 0     | 0     | 0    | 1.05 | 0     | 0    | 0    | 0    | 0    | 1.72E-12  |
| 72392  | 'Tmem175'       | 35.9 | 52.38 | 33.58 | 42.9 | 38.9 | 73.12 | 51.5 | 79.3 | 64.9 | 68.3 | 1.86E-05  |
| 72415  | 'Sgo1'          | 0    | 0     | 0     | 0    | 0    | 0     | 0    | 0    | 3.36 | 0.63 | 1.66E-13  |
| 72512  | 'Tmem173'       | 0    | 0     | 0     | 0    | 0.02 | 26.37 | 0    | 0    | 0.02 | 0    | 2.88E-04  |
| 72535  | 'Aldh1b1'       | 11.8 | 4.77  | 2.98  | 4.81 | 7.62 | 28.02 | 20.3 | 12.1 | 24.4 | 17.7 | 1.06E-04  |
| 73149  | 'Clec4a3'       | 0    | 0     | 0     | 0    | 0    | 3.54  | 0    | 0    | 0    | 0    | 9.47E-12  |
| 73167  | 'Arhgap8'       | 0    | 0     | 0     | 0    | 0    | 0     | 5    | 0    | 3.63 | 0    | 2.45E-13  |
| 73363  | '1700056E22Rik' | 0    | 0     | 0     | 0    | 0    | 0     | 4.78 | 0    | 0    | 0    | 1.10E-11  |
| 73713  | 'Rbm20'         | 1.75 | 0.17  | 0.04  | 0.02 | 0.94 | 0.01  | 0    | 0.01 | 0.01 | 0.01 | 1.25E-05  |
| 73936  | 'Ccadc175'      | 0    | 0     | 0     | 0    | 2.49 | 0     | 0    | 0    | 0    | 0    | 2.47E-13  |

|       |                 |      |       |      |      |      |       |      |      |      |      |           |
|-------|-----------------|------|-------|------|------|------|-------|------|------|------|------|-----------|
| 74044 | 'Ttf2'          | 0    | 0     | 0    | 0    | 0    | 0     | 0    | 0.64 | 1.89 | 0    | 0.0089332 |
| 74131 | 'Sash3'         | 1.13 | 0     | 0    | 0    | 0    | 0     | 0    | 0    | 0    | 0    | 0.0411123 |
| 74152 | 'Stra6'         | 0    | 0     | 0    | 0.02 | 0    | 0     | 8.23 | 0    | 0    | 0.01 | 0.0026536 |
| 74153 | 'Uba7'          | 0    | 0     | 0    | 0    | 0    | 10.29 | 0.2  | 0    | 0    | 2.62 | 1.07E-04  |
| 74156 | 'Acot12'        | 0    | 1.87  | 0    | 0    | 0    | 0     | 0    | 0    | 0    | 0    | 4.62E-13  |
| 74186 | 'Ccdc3'         | 0    | 0     | 0    | 0    | 0    | 0     | 0    | 4.96 | 0    | 0.02 | 1.84E-13  |
| 74191 | 'P2ry13'        | 0    | 0     | 0    | 0    | 0    | 17.05 | 0    | 0    | 0    | 0    | 2.52E-15  |
| 74204 | 'Xpo6'          | 30.2 | 98.04 | 9.7  | 41.1 | 90.4 | 16.55 | 7.34 | 10.6 | 10.9 | 23.2 | 3.18E-04  |
| 74732 | 'Stx11'         | 0    | 0     | 0    | 0    | 0    | 0     | 0    | 0    | 0    | 2.38 | 4.99E-12  |
| 74734 | 'Rhoh'          | 0.01 | 0.01  | 0.01 | 0.02 | 0.01 | 7.51  | 0    | 0    | 0.67 | 2.36 | 1.54E-05  |
| 75526 | 'Eppin'         | 0    | 5.32  | 0    | 0    | 0    | 0     | 0    | 0    | 0    | 0    | 1.74E-12  |
| 75766 | 'Dcstamp'       | 0    | 0     | 0    | 0    | 0    | 0     | 0    | 2    | 0    | 0    | 1.48E-11  |
| 76072 | 'Rnf183'        | 2.69 | 0     | 0    | 0    | 0    | 0     | 0    | 0    | 0    | 0    | 1.14E-11  |
| 76405 | '1700018B08Rik' | 0    | 0     | 0    | 0    | 1.9  | 0     | 0    | 0    | 0    | 0    | 0.0369408 |
| 76415 | 'Fam187b'       | 0    | 0     | 0    | 0    | 3.77 | 0     | 0    | 0    | 0    | 0    | 5.27E-13  |
| 76507 | 'Aoc1'          | 0    | 1.82  | 0    | 0    | 0    | 0     | 0    | 0    | 0    | 0    | 5.89E-13  |
| 76589 | 'Unc5cl'        | 0    | 0     | 0    | 0    | 0    | 0     | 0    | 0    | 1.38 | 0    | 1.40E-11  |
| 76681 | 'Trim12a'       | 0    | 0     | 0    | 0    | 0    | 0     | 6.1  | 0    | 0    | 0    | 7.64E-13  |
| 76854 | 'Gper1'         | 0    | 0     | 0    | 0    | 0    | 0.02  | 0    | 0    | 0    | 3.89 | 5.58E-13  |
| 76856 | 'Catsper3'      | 0    | 0     | 0    | 0    | 0    | 0     | 0    | 0    | 2.83 | 0    | 2.43E-11  |
| 77799 | 'Sla2'          | 0    | 0     | 0    | 0    | 0    | 1.35  | 0    | 0    | 0    | 0    | 1.17E-11  |
| 77998 | 'Grifin'        | 0    | 0     | 0    | 0    | 0    | 0     | 8.38 | 0    | 0    | 0    | 6.56E-12  |
| 78088 | 'Sowahb'        | 0    | 0     | 0    | 6.04 | 0    | 0     | 0    | 0.98 | 0    | 0    | 0.3835219 |
| 78895 | 'Pus7l'         | 0    | 0     | 0    | 0    | 0    | 0     | 0    | 0    | 2.33 | 2.03 | 2.66E-13  |
| 80986 | 'Ckap2'         | 0    | 1.61  | 0    | 0    | 0    | 0     | 0    | 0    | 0    | 0    | 1.16E-12  |
| 83428 | 'Ucn3'          | 0    | 0.03  | 0.07 | 0.04 | 0.03 | 111.8 | 0    | 0    | 207  | 27.1 | 2.24E-07  |
| 83453 | 'Chrdl1'        | 0    | 0     | 1.98 | 0    | 0    | 0     | 0    | 0    | 0    | 0    | 1.41E-13  |
| 84004 | 'Mcam'          | 0.08 | 0.1   | 6.8  | 0    | 0.07 | 0.02  | 0    | 0    | 0    | 0    | 4.48E-04  |
| 93695 | 'Gpnmb'         | 1.63 | 0     | 0    | 0    | 0    | 0     | 0    | 0    | 0    | 0    | 3.24E-13  |
| 93709 | 'Pcdhga1'       | 0    | 2.53  | 3.48 | 0    | 0    | 0     | 0    | 0    | 0    | 0    | 1.83E-15  |
| 93837 | 'Dach2'         | 0    | 0     | 0    | 0    | 0    | 2.01  | 0    | 0    | 0    | 0.01 | 3.38E-12  |
| 93873 | 'Pcdhb2'        | 2.8  | 0     | 0    | 0    | 0    | 0     | 0    | 0    | 0    | 0    | 1.55E-13  |
| 94088 | 'Trim6'         | 0    | 0     | 0    | 0    | 0    | 0     | 0    | 0    | 0    | 1.92 | 1.44E-12  |
| 94220 | 'Cnnm4'         | 6.2  | 6.46  | 4.82 | 3.17 | 9.86 | 1.57  | 1.53 | 1.73 | 3.61 | 3.31 | 0.0031149 |
| 99382 | 'Abtb2'         | 2.97 | 1.19  | 3.95 | 3.34 | 0.01 | 0     | 0    | 0.01 | 0.01 | 0    | 2.97E-09  |
